# Supplementary material for: The genomic landscape of canine diffuse large B-cell lymphoma identifies distinct subtypes with clinical and therapeutic implications
Source: Research Square preprint supplement (doi:10.21203/rs.3.rs-916612/v1), 2021-09-21
Supplement: Supplementary file 2 [file 2d641c502b3271e6926cb09f.xlsx]

## Sheet: Index
Supplementary Data 2: Survival analysis of 77 cDLBCLs sequenced in this study.

## Sheet: Treatment
Median TTP and LSS for dogs treated with chemo-immunotherapy (CH-IM) and chemotherapy alone (CH).
		Median TTP (days)	p-value		Hazard ratio (95% CI)	Median LLS (days)	p-value		Hazard ratio (95% CI)
			Log-rank test	Cox univariate			Log-rank test	Cox univariate
Treatment	CH-IM	283	p=1e-04	p=2e-04	0.38 (0.23-0.63)	470	p=4e-05	p=1e-04	0.36 (0.21-0.6)
	CH	42			ref	90			ref

## Sheet: CH_TTP
Median TTP and survival analysis for dogs treated with chemotherapy alone.
		Median TTP (days)	p-value			Hazard ratio (95% CI)
			Log-rank test	Cox univariate	Cox multivariate
Breed	Pure	32	p=0.07	p=0.0751	p=0.016	2.103 (0.927-4.768)
	Mixed	144				ref
Age	<10 years	38	p=0.9	p=0.86		0.934 (0.435-2.002)
	≥10 years	63				ref
Sex	Male	42	p=1.00	p=0.988		1.006 (0.481-2.1)
	Female	44				ref
Weight	<10 Kg	63	p=0.8	p=0.793		0.850 (0.253-2.863)
	≥10 Kg	39				ref
Stage	4	78				ref
	5	34	p=0.1	p=0.153	p=0.35	1.88 (0.791-4.471)
Substage	a	63				ref
	b	38	p=0.2	p=0.212		1.638 (0.755-3.553)
Bone marrow	Infiltrated	33	p=0.2	p=0.201		1.646 (0.767-3.534)
	Not infiltrated	63				ref
Bone marrow infiltration (%)				p=0.066	p=0.93	1.029 (0.998-1.06)
Blood infiltration (%)				P=0.021	p=0.38	1.047 (1.007-1.088)
LDH	Normal	44				ref
	Increased	26	p=0.4	p=0.358		1.438 (0.663-3.119)
Pre-treatment with steroids	yes	113	p=0.4	p=0.378		0.697 (0.312-1.555)
	no	38				ref
TMB	>0.28	34	p=0.8	p=0.8		1.127 (0.375-3.389)
	<0.21	98				ref
TP53	mut	32	p=0.03	p=0.037	p=0.02	2.41 (1.056-5.499)
	wt	98				ref
MYC	mut	26	p=0.01	p=0.0197	p=0.04	3.138 (1.2-8.205)
	wt	78				ref

## Sheet: CH_LSS
Median LSS and survival analysis for dogs treated with chemotherapy alone.
		Median LSS (days)	p-value			Hazard ratio (95% CI)
			Log-rank test	Cox univariate	Cox multivariate
Breed	Pure	87	p=0.3	p=0.328		1.49 (0.669-3.315)
	Mixed	179				ref
Age	<10 years	160	p=0.6	p=0.562		0.797 (0.371-1.714)
	≥10 years	90				ref
Sex	Male	132	p=0.9	p=0.9		0.954 (0.459-1.984)
	Female	87				ref
Weight	<10 Kg	82	p=0.9	p=0.948		0.960 (0.284-3.252)
	≥10 Kg	100				ref
Stage	4	176				ref
	5	84	p=0.1	p=0.151	p=0.5	1.887 (0.793-4.486)
Substage	a	100				ref
	b	84	p=0.3	p=0.344		1.448 (0.673-3.116)
Bone marrow	Infiltrated	72	p=0.4	p=0.359		1.435 (0.663-3.104)
	Not infiltrated	100				ref
Bone marrow infiltration (%)				p=0.028	p=0.71	1.039 (1.004-1.074)
Blood infiltration (%)				p=0.021	p=0.4	1.046 (1.007-1.086)
LDH	Normal	165				ref
	Increased	62.5	p=0.1	p=0.13	p=0.9	1.807 (0.840-3.883)
Pre-treatment with steroids	yes	178	p=0.5	p=0.522		0.771 (0.347-1.711)
	no	87				ref
TMB	>0.28	75.5	p=0.7	p=0.7		1.285(0.41-4.02)
	<0.21	178				ref
TP53	mut	60	p=0.008	p=0.011	p=0.04	2.866 (1.272-6.459)
	wt	176				ref
MYC	mut	82	p=0.04	p=0.046	p=0.23	2.613 (1.016-6.724)
	wt	176				ref

## Sheet: CH-IM_TTP
Median TTP and survival analysis for dogs treated with chemo-immunotherapy.
		Median TTP (days)	p-value			Hazard ratio (95% CI)
			Log-rank test	Cox univariate	Cox multivariate
Breed	Pure	291	p=0.3	p=0.32		0.667 (0.3-1.483)
	Mixed	262				ref
Age	<10 years	270	p=0.3	p=0.339		1.502 (0.652-3.46)
	≥10 years	355				ref
Sex	Male	317	p=0.1	p=0.137	p=0.17	0.5896 (0.294-1.182)
	Female	260				ref
Weight	<10 Kg	273	p=0.8	p=0.765		1.157 (0.446-3.002)
	≥10 Kg	283				ref
Stage	4	283				ref
	5	300	p=1	p=0.983		0.993 (0.505-1.952)
Substage	a	300				ref
	b	160	p=0.1	p=0.126	p=0.37	1.821 (0.846-3.922)
Bone marrow	Infiltrated	260	p=0.3	p=0.275		1.539 (0.7098-3.338)
	Not infiltrated	283				ref
Bone marrow infiltration (%)				p=0.118	p=0.33	1.025 (0.994-1.058)
Blood infiltration (%)				p=0.316		1.011 (0.989-1.034)
LDH	Normal	308				ref
	Increased	246	p=0.4	p=0.359		1.366 (0.701-2.664)
Pre-treatment with steroids	yes	272	p=0.9	p=0.924		1.036 (0.506-2.119)
	no	291				ref
TMB	>0.28	291	p=0.03	p=0.04		3.07 (1.075-8.8)
	<0.21	649				ref

## Sheet: CH-IM_LSS
Median LSS and survival analysis for dogs treated with chemo-immunotherapy.
		Median LSS (days)	p-value			Hazard ratio (95% CI)
			Log-rank test	Cox univariate	Cox multivariate
Breed	Pure	544	p=0.3	p=0.354		0.671 (0.288-1.56)
	Mixed	422				ref
Age	<10 years	544	p=0.8	p=0.798		0.900 (0.403-2.01)
	≥10 years	330				ref
Sex	Male	585	p=0.1	p=0.104	p=0.45	0.551 (0.269-1.131)
	Female	356				ref
Weight	<10 Kg	757	p=0.4	p=0.377		0.583 (0.176-1.93)
	≥10 Kg	470				ref
Stage	4	356				ref
	5	544	p=0.7	p=0.688		0.868 (0.434-1.734)
Substage	a	547				ref
	b	263	p=0.04	p=0.041	p=0.18	2.245 (1.032-4.887)
Bone marrow	Infiltrated	404	p=0.2	p=0.194	p=0.57	1.675 (0.769-3.649)
	Not infiltrated	470				ref
Bone marrow infiltration (%)				p=0.015	p=0.29	1.042 (1.008-1.077)
Blood infiltration (%)				p=0.403		1.011 (0.986-1.036)
LDH	Normal	547				ref
	Increased	302	p=0.09	p=0.0916	p=0.54	1.809 (0.908-3.601)
Pre-treatment with steroids	yes	374	p=0.8	p=0.812		1.094 (0.52-2.303)
	no	544				ref
TMB	>0.28	435	p=0.03	p=0.04		3.07 (1.06-8.89)
	<0.21	1153				ref
POT1	mut	330	p=0.02	p=0.0217	p=0.14	2.508 (1.144-5.501)
	wt	547				ref
TP53	mut	138	p=0.03	p=0.0374	p=0.013	2.464 (1.054-5.762)
	wt	544				ref
