# Supplementary material for: The genomic landscape of canine diffuse large B-cell lymphoma identifies distinct subtypes with clinical and therapeutic implications
Source: Research Square preprint supplement (doi:10.21203/rs.3.rs-916612/v1), 2021-09-21
Supplement: Supplementary file 3 [file 38c6968d1ce70abe032707b0.xlsx]

## Sheet: Index
Supplementary Data 7: Median TTP and LSS and survival analysis in dogs carrying CFA13, CFA14 and CFA31 aberrations.

## Sheet: CH_TTP
Median TTP and survival analysis for dogs treated with chemotherapy alone.
		Median TTP (days)	p-value		Hazard ratio (95% CI)
			Log-rank test	Cox univariate
Gain CFA 13	no	78			ref
	yes	26	p=0.076	p=0.0766	2.019(0.9277-4.394)
Loss CFA 14	no	38			ref
	yes	42	p=0.55	p=0.57	1.27(0.5559-2.903)
Gain CFA 31	no	63			ref
	yes	39	p=0.27	p=0.272	1.596(0.6937-3.67)

## Sheet: CH_LSS
Median LSS and survival analysis for dogs treated with chemotherapy alone.
		Median LSS (days)	p-value		Hazard ratio (95% CI)
			Log-rank test	Cox univariate
Gain CFA 13	no	165			ref
	yes	69	p=0.1	p=0.107	1.889(0.8709-4.097)
Loss CFA 14	no	90			ref
	yes	100	p=0.41	p=0.41	1.418(0.6174-3.257)
Gain CFA 31	no	160			ref
	yes	90	p=0.58	p=0.586	1.275(0.5325-3.051)

## Sheet: CH-IM_TTP
Median TTP and survival analysis for dogs treated with chemo-immunotherapy.
		Median TTP (days)	p-value		Hazard ratio (95% CI)
			Log-rank test	Cox univariate
Gain CFA 13	no	237			ref
	yes	317	p=0.027	p=0.0309	0.4652(0.2322-0.9319)
Loss CFA 14	no	291			ref
	yes	260	p=0.62	p=0.624	1.248(0.5145-3.029)
Gain CFA 31	no	260			ref
	yes	291	p=0.82	p=0.814	1.091(0.5298-2.246)

## Sheet: CH-IM_LSS
Median LSS and survival analysis for dogs treated with chemo-immunotherapy.
		Median LSS (days)	p-value		Hazard ratio (95% CI)
			Log-rank test	Cox univariate
Gain CFA 13	no	278			ref
	yes	603	p=0.084	p=0.0885	0.5494(0.2759-1.094)
Loss CFA 14	no	442			ref
	yes	546	p=0.66	p=0.671	0.8105(0.3074-2.137)
Gain CFA 31	no	544			ref
	yes	442	p=0.77	p=0.777	1.114(0.5269-2.357)
