# Supplementary material for: The genomic landscape of canine diffuse large B-cell lymphoma identifies distinct subtypes with clinical and therapeutic implications
Source: Research Square preprint supplement (doi:10.21203/rs.3.rs-916612/v1), 2021-09-21
Supplement: Supplementary file 4 [file 3bc1f3d464816e77a91b5b41.xlsx]

## Sheet: Supplementary Data 5
Supplementary Data 5: Significant regions affected by CNAs identified by GISTIC.
Region	Extended Region	Type	Q-Bound	G-Score	% of CNV Overlap	Genes
chr13:59,312,889-59,946,226	chr13:58,994,662-62,935,981	CN Gain	8.3e-15	18.0615	0	UGT2A1,SULT1B1,CSN2,ODAM,CSN3,AMTN,AMBN,ENAM,UTP3,RUFY3,GRSF1,MOB1B,DCK,SLC4A4,GC,NPFFR2,COX18,ANKRD17,AFP,RASSF6,CXCL8,EPGN,AREG,U6,CXCL6,SNORA62,CSN1S1,MTHFD2L,JCHAIN,EREG,PRR27,PPBP,FDCSP,U2,LOC100856129,ALB,LOC475163,LOC482182,CABS1,LOC482194,LOC106557449,LOC111098430,LOC482178,SMR3A,MUC7,LOC111098636,SULT1D1,AFM,ADAMTS3,LOC102152328,LOC102154125,LOC111098479,LOC111098480,LOC111098481,STATH,L…
chr5:40,772,561-40,772,650	chr5:40,772,434-40,772,666	CN Gain	8.3e-15	17.1369	0	-
chr27:13,166,106-13,166,630	chr27:13,166,106-13,189,857	CN Gain	8.3e-15	14.4183	0	MUC19
chr6:43,078,369-43,079,328	chr6:43,061,947-43,081,365	CN Gain	2.19e-13	12.8577	0	LOC102157388,LOC611891,LOC106558951,LOC111096356
chr4:10,464,703-10,464,726	chr4:10,463,137-10,464,751	CN Gain	2.07e-12	12.4276	0	5S_rRNA
chr31:38,190,501-38,263,385	chr31:37,282,697-39,828,555	CN Gain	1.45e-11	11.9971	0	PCBP3,CRYAA,HSF2BP,RRP1B,CSTB,RRP1,AGPAT3,TRAPPC10,AIRE,PFKL,CFAP410,TSPEAR,ITGB2,FAM207A,ADARB1,SLC19A1,COL6A1,FTCD,SPATC1L,LSS,MCM3AP,YBEY,PCNT,DIP2A,S100B,PRMT2,C31H21orf58,POFUT2,LRRC3,UBE2G2,PDXK,U4,SUMO3,PTTG1IP,SIK1,LOC102151942,LOC611489,LOC100855886,LOC100855906,LOC100856490,LOC100855866,C31H21orf2,LOC102151833,LOC106558106,ICOSLG,COL6A2,LOC100855763,LOC111093468,LOC106557509,C31H21orf33…
chrM:16,054-16,727	chrM:0-16,727	CN Loss	1.58e-09	192.798	0	MT-ND1,MT-ND2,MT-CO1,MT-CO2,MT-ATP8,MT-ATP6,MT-CO3,MT-ND3,ND4L,MT-ND4,MT-ND5,MT-ND6,MT-CYB
chr17:61,223,075-61,224,704	chr17:61,223,019-61,225,171	CN Gain	2.78e-09	10.6474	0	FLG
chr7:80,965,692-80,965,694	chr7:80,965,679-80,965,705	CN Gain	5.06e-09	10.4707	0	LOC102153568,LOC111096846
chr17:37,693,236-37,702,642	chr17:37,690,522-37,753,596	CN Loss	7.47e-09	126.781	0	IGKC,LOC111090617,LOC111090618,LOC111090621
chr26:27,546,674-27,552,755	chr26:27,364,916-27,601,234	CN Loss	7.47e-09	106.53	0	LOC607368,LOC111092623
chr8:73,005,832-73,027,618	chr8:73,004,167-73,028,708	CN Loss	7.47e-09	99.2277	0	-
chr9:18,007,117-18,008,566	chr9:18,001,843-18,016,386	CN Loss	7.47e-09	31.4339	0	LOC102153199,RDM1,LOC611199
chr26:31,264,895-31,298,605	chr26:31,264,895-31,310,841	CN Loss	7.47e-09	27.443	0	LOC102154172
chr7:80,965,567-80,965,580	chr7:80,965,549-80,965,581	CN Loss	7.47e-09	26.8366	0	LOC102153568,LOC111096846
chr9:8,672,592-8,693,283	chr9:8,661,879-8,831,410	CN Loss	1.01e-08	21.7061	0	LOC102156711,LOC102156794,LOC111097306
chr17:21,597,892-21,620,944	chr17:21,543,846-21,622,512	CN Gain	1.39e-08	10.2225	0	GPN1,ZNF512,SUPT7L,SLC4A1AP,MIR1837-2,LOC100688011,LOC475708,LOC102152653,LOC608308,LOC102152842,LOC100855940
chr4:10,464,879-10,464,880	chr4:10,464,851-10,464,881	CN Loss	4.65e-08	19.933	0	5S_rRNA
chr5:78,324,367-78,346,465	chr5:78,224,396-78,388,578	CN Loss	4.65e-08	19.8499	0	LOC102153393,LOC106558859,LOC111096044
chrX:336,294-346,406	chrX:0-350,090	CN Loss	7.56e-08	19.4202	0	GTPBP6,PPP2R3B,LOC100855509,LOC102152626,PLCXD1,LOC102156180,LOC607103,LOC102152911,LOC102154958,LOC102152688,LOC111094897
chr38:21,090,503-21,111,922	chr38:21,090,503-21,111,922	CN Loss	1.74e-07	18.7385	0	-
chr23:20,489,372-20,715,408	chr23:20,489,372-21,724,986	CN Loss	4.49e-07	18.0198	0	U6,UBE2E2,ZNF385D,LOC111091908
chr28:41,168,167-41,182,112	chr28:41,156,544-41,182,112	CN Loss	7.33e-07	17.6472	0	SYCE1,MIR8818,LOC102154926,LOC111092986,LOC111092960,LOC102154876
chr1:60,597,277-60,597,278	chr1:60,597,014-60,597,303	CN Loss	8.36e-07	17.5547	0	-
chr20:51,790,951-51,791,032	chr20:51,790,951-51,792,728	CN Gain	1.03e-06	9.04328	0	LOC106560102,LOC476718
chr9:21,550,573-21,557,274	chr9:21,526,119-21,557,309	CN Loss	1.69e-06	17.0604	0	LOC100685086
chr5:78,450,339-78,454,429	chr5:78,450,339-78,454,506	CN Gain	7.98e-06	8.46684	0	ZFHX3,LOC102153393
chr17:37,625,064-37,628,212	chr17:37,557,724-37,633,496	CN Loss	8.8e-06	15.9149	0	-
chr18:49,083,713-49,103,950	chr18:49,083,713-49,157,520	CN Gain	1.35e-05	8.29544	0	IGHMBP2,CPT1A,MRPL21,LOC102151880
chr2:84,133,700-84,139,169	chr2:84,133,637-84,141,711	CN Loss	1.87e-05	15.2719	0	VPS13D,TNFRSF1B
chr19:52,563,802-52,565,186	chr19:52,562,630-52,578,208	CN Loss	1.98e-05	15.2348	0	NEB,LOC111091205
chr13:3,977,390-3,979,344	chr13:3,681,617-4,088,146	CN Gain	2.31e-05	8.14143	0	RRM2B,UBR5,NCALD,LOC100684029,LOC102156908,LOC111098500
chr14:27,527,840-28,662,969	chr14:27,527,840-28,662,969	CN Loss	5.04e-05	14.324	0	ARL4A,ETV1,LOC111098673,LOC102151173
chr3:91,859,125-91,889,043	chr3:91,840,728-91,889,043	CN Loss	0.000153	13.3215	0	PIGG,MIR8899,LOC102154042,LOC106558600
chr16:59,362,511-59,366,964	chr16:59,054,237-59,444,311	CN Loss	0.000182	13.0291	0	LOC100684338,LOC611251,LOC111090195,LOC102152737,LOC611292,LOC611374
chr1:60,597,012-60,597,014	chr1:60,596,277-60,599,297	CN Gain	0.000186	7.46266	0	-
chr6:8,841,389-8,841,820	chr6:8,838,299-8,841,820	CN Loss	0.000204	12.9074	0	LOC102151823
chr12:72,497,916-72,498,081	chr12:72,495,651-72,498,081	CN Loss	0.000217	12.854	0	-
chr24:19,241,033-19,241,409	chr24:19,228,408-19,323,069	CN Loss	0.00023	12.6831	0	U6,LOC100856302,LOC111092148,LOC477182,LOC102156897,LOC111092094
chr13:63,237,837-63,241,923	chr13:63,237,739-63,241,923	CN Loss	0.00023	12.6224	0	-
chr2:23,209,177-23,209,988	chr2:23,177,951-23,235,569	CN Loss	0.000238	12.2869	0	SEPHS1,PHYH,LOC607509,LOC478001
chr30:40,207,999-40,214,260	chr30:40,197,860-40,214,260	CN Loss	0.000238	12.2538	0	LOC111093318
chr32:16,642,264-16,643,456	chr32:16,637,154-16,643,456	CN Loss	0.000274	11.8392	0	GRID2
chr16:1,291,027-1,293,098	chr16:1,253,399-1,319,730	CN Loss	0.00035	11.4588	0	MIR8853,LOC102152535,LOC106559822
chr9:10,368,207-10,370,823	chr9:10,348,286-10,375,232	CN Loss	0.000436	11.2461	0	LOC102154635,LOC490917
chr6:77,561,433-77,573,801	chr6:77,539,322-77,573,801	CN Loss	0.000452	11.2078	0	-
chr38:23,900,741-23,914,537	chr38:23,899,573-23,914,537	CN Loss	0.000521	10.9611	0	LOC111094573
chr26:25,277,887-25,595,608	chr26:25,277,887-25,609,092	CN Gain	0.00091	6.93917	0	LOC111092502,LOC111092676
chr27:13,143,937-13,144,157	chr27:13,143,937-13,146,240	CN Loss	0.000957	10.3259	0	MUC19
chr25:51,593,357-51,628,933	chr25:51,588,394-51,628,933	CN Loss	0.00144984	10.0072	0	GAL3ST2,PDCD1,NEU4,RTP5
chr21:50,752,480-50,767,833	chr21:50,750,923-50,858,623	CN Loss	0.00200945	9.75159	0	MIR8813-1,LOC102156346
chr9:18,195,737-18,244,395	chr9:18,194,829-18,248,574	CN Loss	0.00223172	9.67687	0	ARHGAP27,LOC106559274
chr2:4,511,428-4,541,058	chr2:4,511,428-4,541,058	CN Gain	0.00253366	6.57241	0	LOC607646
chr9:18,025,479-18,039,373	chr9:18,025,479-18,039,373	CN Gain	0.00282735	6.53426	0	LOC102151133,LOC102151216,LOC111097340
chrX:123,835,293-123,869,142	chrX:123,828,689-123,869,142	CN Loss	0.00301194	9.44921	0	IL9R
chr10:17,397,230-18,242,411	chr10:17,394,371-19,522,417	CN Loss	0.00421436	9.18561	0	BRD1,TBC1D22A,FAM19A5,LOC106559363,LOC102157395,LOC102151191,LOC111097829,LOC102157253,LOC102151247
chr18:18,452,025-18,792,144	chr18:18,452,025-18,792,144	CN Loss	0.00523332	9.01	0	MAGI2
chr4:78,211,711-78,964,840	chr4:76,241,384-86,277,217	CN Loss	0.00536833	9.0019	0	CDH9,CDH10,CDH12,CDH18,U2,SNORA62,U6,AP5M1,LOC102156814,LOC102156065,LOC111095657,LOC111095658,LOC102156538,LOC111095659,LOC111095660,LOC102156602,LOC111095661,LOC111095662,LOC111095663,LOC111095664,LOC111095665,LOC111095666,LOC111095667,LOC111095668,LOC111095669,LOC111095732,LOC111095733,LOC111095734,LOC111095735,LOC111095736,LOC111095737,LOC111095738,LOC111095739,LOC111095740,LOC111095741,LOC11…
chr1:101,927,993-102,014,225	chr1:101,842,475-102,014,225	CN Loss	0.00572092	8.95947	0	NLRP5,NLRP8,NLRP9,NLRP13,LOC102155284
chr26:28,850,744-28,884,123	chr26:28,850,744-28,891,032	CN Loss	0.00683923	8.80581	0	MIR8905,LOC102152878
chr8:44,110,194-44,122,195	chr8:44,110,194-44,122,448	CN Gain	0.00741217	6.15133	0	LOC611720,LOC111097092
chr20:57,857,188-58,030,549	chr20:57,806,351-58,130,099	CN Loss	0.00831601	8.64992	0	PLPPR3,PTBP1,PALM,PRSS57,RNF126,FGF22,POLRMT,HCN2,BSG,TPGS1,ODF3L2,C2CD4C,THEG,MIER2,PLPP2,MADCAM1,FSTL3,MISP,CDC34,SHC2,LOC102155774,LOC111091410,LOC111091411,LOC102156186,LOC102156540
chr5:40,772,469-40,772,511	chr5:40,772,391-40,772,896	CN Loss	0.00848752	8.63384	0	-
chr8:73,580,157-73,647,021	chr8:73,547,906-73,675,159	CN Loss	0.00880992	8.60669	0	-
chr18:45,535,895-45,537,062	chr18:45,533,332-45,537,062	CN Loss	0.00880992	8.59197	0	MUC5B
chr37:30,883,798-30,902,991	chr37:30,860,972-30,902,991	CN Loss	0.00948589	8.53721	0	CLN8
chr8:2,839,953-2,848,954	chr8:2,837,000-2,857,542	CN Loss	0.0193013	7.94769	0	LOC102155413
chr3:56,598,639-56,598,718	chr3:56,598,551-56,598,721	CN Gain	0.019932	5.75099	0	CFAP161
chrM:0-16,727	chrM:0-16,727	CN Gain	0.0203404	5.74433	0	MT-ND1,MT-ND2,MT-CO1,MT-CO2,MT-ATP8,MT-ATP6,MT-CO3,MT-ND3,ND4L,MT-ND4,MT-ND5,MT-ND6,MT-CYB
chr9:17,013,106-17,258,816	chr9:17,013,106-17,308,236	CN Gain	0.0288543	5.60401	0	U6,U4,U2,LOC111097530
chr9:7,498,535-8,027,254	chr9:7,498,535-8,027,254	CN Loss	0.030652	7.53962	0	LOC100856617,LOC111097302,LOC111097303
chr8:72,426,506-72,426,519	chr8:72,425,881-72,851,053	CN Gain	0.0324771	5.56228	0	CDCA4,JAG2,NUDT14,BRF1,BTBD6,PACS2,MTA1,CRIP2,CRIP1,TEDC1,TMEM121,TEX22,CLBA1,GPR132,LOC111097176,LOC111097177,AHNAK2,LOC111097254
chr12:985,558-997,785	chr12:985,558-1,002,623	CN Loss	0.0327427	7.48219	0	DLA-64,DLA88,LOC106559562
chr33:31,123,416-31,124,550	chr33:31,118,941-31,126,526	CN Loss	0.0341107	7.43997	0	LSG1
chr11:41,168,807-41,264,140	chr11:40,712,135-41,579,466	CN Loss	0.0341107	7.43708	0	MTAP,DMRTA1,KLHL9,IFNA7,IFNA5,MIR31,LOC100685213,LOC100687692,LOC100687778,LOC100687857,LOC100687928,LOC100688005,LOC100688084,CDKN2B,CDKN2A,IFNE,LOC611406,LOC102152624,LOC106559483,LOC106559482,LOC111098066,LOC102153066,LOC102153108,LOC111098067
chr16:10,435,478-10,452,651	chr16:10,346,061-10,504,020	CN Gain	0.0358264	5.51141	0	CCM2,MIR8794-1,MIR8793-2,MIR8907,AKR1D1,LOC102155933,LOC102155169
chr3:10,013,567-10,372,670	chr3:10,013,567-11,261,800	CN Loss	0.0401952	7.26577	0	FAM174A,U6,LOC100688177,LOC111095120
chr19:20,163,908-20,319,782	chr19:20,074,158-20,348,500	CN Gain	0.0464113	5.40173	0	CFC1,LOC111091126,LOC102156811,LOC102156891
