# Supplementary material for: The genomic landscape of canine diffuse large B-cell lymphoma identifies distinct subtypes with clinical and therapeutic implications
Source: Research Square preprint supplement (doi:10.21203/rs.3.rs-916612/v1), 2021-09-21
Supplement: Supplementary file 6 [file 6b154c63ee4f5157d575f8d0.xlsx]

## Sheet: Index
Supplementary Data 8: Gene-set enrichment analysis (GSEA) in cDLBCL based on TRAF3 mutational status (mut vs wt).

## Sheet: pos
Positively enriched pathways in TRAF3 mutated samples compared to wild-type.
NAME	GS<br> follow link to MSigDB	GS DETAILS	SIZE	ES	NES	NOM p-val	FDR q-val	FWER p-val	RANK AT MAX	LEADING EDGE
KEGG_RIBOSOME	KEGG_RIBOSOME	Details ...	40	0.750327	2.50201	0	0	0	1330	tags=68%, list=11%, signal=76%
GOMF_STRUCTURAL_CONSTITUENT_OF_RIBOSOME	GOMF_STRUCTURAL_CONSTITUENT_OF_RIBOSOME	Details ...	94	0.624192	2.36192	0	0.000767842	0.002	2613	tags=56%, list=22%, signal=72%
GOCC_RIBOSOME	GOCC_RIBOSOME	Details ...	146	0.562202	2.24155	0	0.00152717	0.006	2613	tags=51%, list=22%, signal=65%
GOCC_RIBOSOMAL_SUBUNIT	GOCC_RIBOSOMAL_SUBUNIT	Details ...	116	0.573656	2.23042	0	0.00133873	0.007	2613	tags=55%, list=22%, signal=70%
GOCC_LARGE_RIBOSOMAL_SUBUNIT	GOCC_LARGE_RIBOSOMAL_SUBUNIT	Details ...	74	0.611856	2.2203	0	0.00137344	0.009	2613	tags=57%, list=22%, signal=72%
GOCC_POLYSOMAL_RIBOSOME	GOCC_POLYSOMAL_RIBOSOME	Details ...	16	0.850908	2.20315	0	0.0015303	0.012	712	tags=50%, list=6%, signal=53%
GOBP_COTRANSLATIONAL_PROTEIN_TARGETING_TO_MEMBRANE	GOBP_COTRANSLATIONAL_PROTEIN_TARGETING_TO_MEMBRANE	Details ...	52	0.64971	2.20227	0	0.00131168	0.012	2012	tags=58%, list=17%, signal=69%
GOBP_RIBOSOME_ASSEMBLY	GOBP_RIBOSOME_ASSEMBLY	Details ...	43	0.643955	2.15412	0	0.0028797	0.029	2030	tags=47%, list=17%, signal=56%
GOCC_CYTOSOLIC_LARGE_RIBOSOMAL_SUBUNIT	GOCC_CYTOSOLIC_LARGE_RIBOSOMAL_SUBUNIT	Details ...	28	0.711295	2.15018	0	0.00281572	0.032	1321	tags=57%, list=11%, signal=64%
GOCC_CYTOSOLIC_RIBOSOME	GOCC_CYTOSOLIC_RIBOSOME	Details ...	52	0.621059	2.10448	0	0.00729826	0.091	2613	tags=71%, list=22%, signal=91%
GOBP_TRANSLATIONAL_INITIATION	GOBP_TRANSLATIONAL_INITIATION	Details ...	126	0.510161	2.02892	0	0.0267571	0.322	2184	tags=40%, list=18%, signal=48%
GOBP_CYTOPLASMIC_TRANSLATION	GOBP_CYTOPLASMIC_TRANSLATION	Details ...	72	0.559925	1.99704	0	0.0413129	0.483	2294	tags=43%, list=19%, signal=53%
GOCC_INTRACILIARY_TRANSPORT_PARTICLE	GOCC_INTRACILIARY_TRANSPORT_PARTICLE	Details ...	22	0.692719	1.97826	0	0.0504034	0.581	2951	tags=68%, list=25%, signal=91%
GOBP_RIBONUCLEOPROTEIN_COMPLEX_SUBUNIT_ORGANIZATION	GOBP_RIBONUCLEOPROTEIN_COMPLEX_SUBUNIT_ORGANIZATION	Details ...	155	0.478389	1.97703	0	0.0477368	0.589	2347	tags=33%, list=20%, signal=41%
GOBP_VIRAL_GENE_EXPRESSION	GOBP_VIRAL_GENE_EXPRESSION	Details ...	139	0.488766	1.96929	0	0.0483974	0.624	2205	tags=33%, list=19%, signal=40%
GSE2405_0H_VS_9H_A_PHAGOCYTOPHILUM_STIM_NEUTROPHIL_DN	GSE2405_0H_VS_9H_A_PHAGOCYTOPHILUM_STIM_NEUTROPHIL_DN	Details ...	130	0.490959	1.95844	0	0.0523026	0.672	3155	tags=45%, list=27%, signal=61%
GOCC_CILIARY_TRANSITION_ZONE	GOCC_CILIARY_TRANSITION_ZONE	Details ...	48	0.596285	1.9519	0	0.0534369	0.69	2578	tags=48%, list=22%, signal=61%
GOBP_RIBONUCLEOPROTEIN_COMPLEX_BIOGENESIS	GOBP_RIBONUCLEOPROTEIN_COMPLEX_BIOGENESIS	Details ...	353	0.431325	1.95166	0	0.0504682	0.69	2546	tags=31%, list=22%, signal=39%
GOBP_NUCLEAR_TRANSCRIBED_MRNA_CATABOLIC_PROCESS_NONSENSE_MEDIATED_DECAY	GOBP_NUCLEAR_TRANSCRIBED_MRNA_CATABOLIC_PROCESS_NONSENSE_MEDIATED_DECAY	Details ...	71	0.518887	1.94563	0.00352113	0.051785	0.719	1332	tags=38%, list=11%, signal=43%
GOCC_PHOTORECEPTOR_CONNECTING_CILIUM	GOCC_PHOTORECEPTOR_CONNECTING_CILIUM	Details ...	25	0.656995	1.93927	0	0.0531176	0.75	1936	tags=48%, list=16%, signal=57%
GOCC_CILIARY_BASAL_BODY	GOCC_CILIARY_BASAL_BODY		122	0.487068	1.93311	0	0.0544755	0.776	3052	tags=44%, list=26%, signal=59%
GOBP_MITOCHONDRIAL_RESPIRATORY_CHAIN_COMPLEX_ASSEMBLY	GOBP_MITOCHONDRIAL_RESPIRATORY_CHAIN_COMPLEX_ASSEMBLY		84	0.513755	1.93215	0	0.0528033	0.783	2811	tags=43%, list=24%, signal=56%
GOCC_ORGANELLAR_RIBOSOME	GOCC_ORGANELLAR_RIBOSOME		71	0.52901	1.92788	0	0.0534483	0.807	3703	tags=61%, list=31%, signal=88%
GOCC_MITOCHONDRIAL_PROTEIN_CONTAINING_COMPLEX	GOCC_MITOCHONDRIAL_PROTEIN_CONTAINING_COMPLEX		205	0.458739	1.92023	0	0.0573795	0.839	3703	tags=50%, list=31%, signal=72%
HP_ERYTHROID_HYPOPLASIA	HP_ERYTHROID_HYPOPLASIA		15	0.739243	1.9174	0	0.0571152	0.85	2012	tags=73%, list=17%, signal=88%
GOBP_MITOCHONDRIAL_TRANSLATIONAL_TERMINATION	GOBP_MITOCHONDRIAL_TRANSLATIONAL_TERMINATION		73	0.529659	1.91595	0	0.056193	0.855	3703	tags=59%, list=31%, signal=85%
GOBP_MITOCHONDRIAL_GENE_EXPRESSION	GOBP_MITOCHONDRIAL_GENE_EXPRESSION		147	0.474408	1.91211	0	0.0566476	0.871	3468	tags=48%, list=29%, signal=67%
GOBP_TRNA_PROCESSING	GOBP_TRNA_PROCESSING		113	0.497539	1.9067	0	0.0583692	0.89	2939	tags=42%, list=25%, signal=56%
GOMF_RRNA_BINDING	GOMF_RRNA_BINDING		46	0.573707	1.89513	0	0.0647425	0.927	2405	tags=46%, list=20%, signal=57%
GOBP_ESTABLISHMENT_OF_PROTEIN_LOCALIZATION_TO_ENDOPLASMIC_RETICULUM	GOBP_ESTABLISHMENT_OF_PROTEIN_LOCALIZATION_TO_ENDOPLASMIC_RETICULUM		65	0.533629	1.87975	0	0.0749365	0.958	1139	tags=37%, list=10%, signal=41%
GOBP_MITOCHONDRIAL_TRANSLATION	GOBP_MITOCHONDRIAL_TRANSLATION		117	0.474555	1.8665	0	0.0843452	0.978	3703	tags=51%, list=31%, signal=74%
GOBP_RIBOSOME_BIOGENESIS	GOBP_RIBOSOME_BIOGENESIS		243	0.42223	1.85889	0	0.0895117	0.985	2546	tags=32%, list=22%, signal=40%
GOCC_MITOCHONDRIAL_LARGE_RIBOSOMAL_SUBUNIT	GOCC_MITOCHONDRIAL_LARGE_RIBOSOMAL_SUBUNIT		45	0.561754	1.85465	0	0.0913206	0.988	3703	tags=67%, list=31%, signal=97%
GOBP_TRANSLATIONAL_TERMINATION	GOBP_TRANSLATIONAL_TERMINATION		87	0.497308	1.85158	0	0.0921614	0.993	3703	tags=54%, list=31%, signal=78%
HP_MALIGNANT_GENITOURINARY_TRACT_TUMOR	HP_MALIGNANT_GENITOURINARY_TRACT_TUMOR		16	0.7133	1.84999	0.00913242	0.0911515	0.993	2012	tags=63%, list=17%, signal=75%
GOBP_TERMINATION_OF_RNA_POLYMERASE_I_TRANSCRIPTION	GOBP_TERMINATION_OF_RNA_POLYMERASE_I_TRANSCRIPTION		24	0.64405	1.8385	0.00699301	0.10016	1	2603	tags=58%, list=22%, signal=75%
GOCC_INNER_MITOCHONDRIAL_MEMBRANE_PROTEIN_COMPLEX	GOCC_INNER_MITOCHONDRIAL_MEMBRANE_PROTEIN_COMPLEX		104	0.47876	1.82469	0	0.113485	1	2699	tags=39%, list=23%, signal=51%
GOBP_TRANSLATIONAL_ELONGATION	GOBP_TRANSLATIONAL_ELONGATION		107	0.469262	1.8238	0	0.111369	1	3703	tags=50%, list=31%, signal=71%
GOBP_SPLICEOSOMAL_COMPLEX_ASSEMBLY	GOBP_SPLICEOSOMAL_COMPLEX_ASSEMBLY		48	0.545941	1.82368	0	0.108711	1	1148	tags=23%, list=10%, signal=25%
GOBP_DNA_TEMPLATED_TRANSCRIPTION_TERMINATION	GOBP_DNA_TEMPLATED_TRANSCRIPTION_TERMINATION		56	0.519766	1.81008	0.00319489	0.122699	1	2637	tags=38%, list=22%, signal=48%
HP_PERSISTENCE_OF_HEMOGLOBIN_F	HP_PERSISTENCE_OF_HEMOGLOBIN_F		17	0.678305	1.80001	0.0112613	0.13243	1	2012	tags=59%, list=17%, signal=71%
HP_ADENOCARCINOMA_OF_THE_INTESTINES	HP_ADENOCARCINOMA_OF_THE_INTESTINES		24	0.614785	1.78736	0.00765306	0.147799	1	1139	tags=38%, list=10%, signal=41%
GOMF_RNA_POLYMERASE_ACTIVITY	GOMF_RNA_POLYMERASE_ACTIVITY		32	0.575247	1.78701	0	0.144971	1	2383	tags=38%, list=20%, signal=47%
HP_STREAK_OVARY	HP_STREAK_OVARY		17	0.677293	1.78487	0.00236407	0.144523	1	515	tags=18%, list=4%, signal=18%
GOCC_POLYSOME	GOCC_POLYSOME		46	0.536627	1.77344	0.00595238	0.15906	1	712	tags=24%, list=6%, signal=25%
GOCC_CILIARY_TIP	GOCC_CILIARY_TIP		40	0.544556	1.77167	0.00294985	0.158362	1	2951	tags=50%, list=25%, signal=66%
GOBP_NADH_DEHYDROGENASE_COMPLEX_ASSEMBLY	GOBP_NADH_DEHYDROGENASE_COMPLEX_ASSEMBLY		56	0.504159	1.76608	0.00864553	0.16315	1	2807	tags=41%, list=24%, signal=54%
HP_ABNORMAL_NUMBER_OF_ERYTHROID_PRECURSORS	HP_ABNORMAL_NUMBER_OF_ERYTHROID_PRECURSORS		23	0.620582	1.76254	0.0025974	0.165512	1	2164	tags=52%, list=18%, signal=64%
HP_ADENOCARCINOMA_OF_THE_LARGE_INTESTINE	HP_ADENOCARCINOMA_OF_THE_LARGE_INTESTINE		19	0.632348	1.76198	0.0195122	0.163046	1	2012	tags=53%, list=17%, signal=63%
GOBP_RESPIRATORY_SYSTEM_PROCESS	GOBP_RESPIRATORY_SYSTEM_PROCESS		22	0.628498	1.76004	0.00735294	0.162536	1	1812	tags=41%, list=15%, signal=48%
GOBP_RIBOSOMAL_SMALL_SUBUNIT_BIOGENESIS	GOBP_RIBOSOMAL_SMALL_SUBUNIT_BIOGENESIS		58	0.500194	1.75139	0.0030303	0.173112	1	2196	tags=38%, list=19%, signal=46%
GOBP_RRNA_METABOLIC_PROCESS	GOBP_RRNA_METABOLIC_PROCESS		194	0.416164	1.74941	0	0.173277	1	3704	tags=42%, list=31%, signal=61%
GOBP_TRNA_MODIFICATION	GOBP_TRNA_MODIFICATION		77	0.480451	1.74521	0.0035461	0.176858	1	2939	tags=40%, list=25%, signal=53%
GOBP_PROTEIN_LOCALIZATION_TO_ENDOPLASMIC_RETICULUM	GOBP_PROTEIN_LOCALIZATION_TO_ENDOPLASMIC_RETICULUM		87	0.465742	1.73736	0.00390625	0.187552	1	1139	tags=29%, list=10%, signal=32%
GOBP_INTRACILIARY_TRANSPORT_INVOLVED_IN_CILIUM_ASSEMBLY	GOBP_INTRACILIARY_TRANSPORT_INVOLVED_IN_CILIUM_ASSEMBLY		33	0.562186	1.73593	0.00253807	0.186927	1	1655	tags=36%, list=14%, signal=42%
GOBP_TRANSCRIPTION_ELONGATION_FROM_RNA_POLYMERASE_I_PROMOTER	GOBP_TRANSCRIPTION_ELONGATION_FROM_RNA_POLYMERASE_I_PROMOTER		22	0.628961	1.73515	0.0101266	0.184732	1	2603	tags=59%, list=22%, signal=76%
HP_NEPHRONOPHTHISIS	HP_NEPHRONOPHTHISIS		31	0.574235	1.73469	0.0100503	0.182355	1	3024	tags=45%, list=26%, signal=61%
GOBP_TRANSCRIPTION_INITIATION_FROM_RNA_POLYMERASE_I_PROMOTER	GOBP_TRANSCRIPTION_INITIATION_FROM_RNA_POLYMERASE_I_PROMOTER		29	0.578907	1.73112	0.00527705	0.184911	1	2743	tags=48%, list=23%, signal=63%
HP_PRIMARY_GONADAL_INSUFFICIENCY	HP_PRIMARY_GONADAL_INSUFFICIENCY		15	0.675878	1.72406	0.00485437	0.194599	1	426	tags=20%, list=4%, signal=21%
GOBP_TRNA_METHYLATION	GOBP_TRNA_METHYLATION		34	0.548514	1.72205	0.00286533	0.194875	1	2939	tags=47%, list=25%, signal=62%
HP_ABNORMAL_ERYTHROCYTE_ENZYME_LEVEL	HP_ABNORMAL_ERYTHROCYTE_ENZYME_LEVEL		16	0.660294	1.72009	0.013245	0.194993	1	2012	tags=63%, list=17%, signal=75%
GOBP_EXTRACELLULAR_TRANSPORT	GOBP_EXTRACELLULAR_TRANSPORT		22	0.611062	1.7181	0.0116279	0.195223	1	669	tags=32%, list=6%, signal=34%
HP_EPISODIC_TACHYPNEA	HP_EPISODIC_TACHYPNEA		32	0.55576	1.70895	0.00828729	0.207566	1	4670	tags=69%, list=40%, signal=113%
GOBP_REGULATION_OF_GLUCONEOGENESIS	GOBP_REGULATION_OF_GLUCONEOGENESIS		31	0.56149	1.70788	0.00738916	0.206296	1	295	tags=16%, list=2%, signal=16%
HP_CELLULAR_IMMUNODEFICIENCY	HP_CELLULAR_IMMUNODEFICIENCY		28	0.570174	1.70626	0.00527705	0.206067	1	2185	tags=36%, list=18%, signal=44%
GOBP_RIBOSOMAL_LARGE_SUBUNIT_BIOGENESIS	GOBP_RIBOSOMAL_LARGE_SUBUNIT_BIOGENESIS		49	0.49332	1.69478	0.00882353	0.224318	1	2017	tags=35%, list=17%, signal=42%
GOBP_NCRNA_PROCESSING	GOBP_NCRNA_PROCESSING		331	0.371666	1.68356	0	0.243335	1	3839	tags=44%, list=32%, signal=63%
HP_GENU_VARUM	HP_GENU_VARUM		37	0.528464	1.6802	0.0026738	0.247416	1	1633	tags=32%, list=14%, signal=38%
GOCC_U2_SNRNP	GOCC_U2_SNRNP		17	0.635486	1.6789	0.017199	0.246503	1	1148	tags=29%, list=10%, signal=33%
HP_CONSTRICTION_OF_PERIPHERAL_VISUAL_FIELD	HP_CONSTRICTION_OF_PERIPHERAL_VISUAL_FIELD		49	0.511966	1.67833	0.00569801	0.244138	1	2662	tags=45%, list=23%, signal=58%
GSE14000_TRANSLATED_RNA_VS_MRNA_DC_DN	GSE14000_TRANSLATED_RNA_VS_MRNA_DC_DN		111	0.420105	1.67682	0	0.243745	1	2853	tags=44%, list=24%, signal=58%
KEGG_RNA_POLYMERASE	KEGG_RNA_POLYMERASE		22	0.595017	1.67454	0.0209974	0.24484	1	2383	tags=41%, list=20%, signal=51%
GOBP_RIBOSOMAL_LARGE_SUBUNIT_ASSEMBLY	GOBP_RIBOSOMAL_LARGE_SUBUNIT_ASSEMBLY		18	0.623081	1.66663	0.0214797	0.258797	1	1321	tags=44%, list=11%, signal=50%
HP_LUMBAR_HYPERLORDOSIS	HP_LUMBAR_HYPERLORDOSIS		55	0.488711	1.65996	0.00297619	0.269804	1	464	tags=11%, list=4%, signal=11%
KEGG_STEROID_HORMONE_BIOSYNTHESIS	KEGG_STEROID_HORMONE_BIOSYNTHESIS		17	0.629892	1.65713	0.0241546	0.272106	1	936	tags=35%, list=8%, signal=38%
GOBP_NUCLEAR_TRANSCRIBED_MRNA_CATABOLIC_PROCESS	GOBP_NUCLEAR_TRANSCRIBED_MRNA_CATABOLIC_PROCESS		148	0.404169	1.65661	0	0.269709	1	2108	tags=30%, list=18%, signal=37%
GOBP_MONOSACCHARIDE_BIOSYNTHETIC_PROCESS	GOBP_MONOSACCHARIDE_BIOSYNTHETIC_PROCESS		66	0.463506	1.65627	0	0.266886	1	450	tags=14%, list=4%, signal=14%
HP_LOW_ANTERIOR_HAIRLINE	HP_LOW_ANTERIOR_HAIRLINE		81	0.444561	1.65438	0	0.267282	1	2193	tags=28%, list=19%, signal=35%
HP_ABNORMALITY_OF_THE_THENAR_EMINENCE	HP_ABNORMALITY_OF_THE_THENAR_EMINENCE		16	0.633115	1.65375	0.00900901	0.26537	1	2012	tags=69%, list=17%, signal=83%
GSE2405_0H_VS_24H_A_PHAGOCYTOPHILUM_STIM_NEUTROPHIL_UP	GSE2405_0H_VS_24H_A_PHAGOCYTOPHILUM_STIM_NEUTROPHIL_UP		133	0.422348	1.65237	0	0.264943	1	1700	tags=30%, list=14%, signal=35%
GOCC_SMALL_RIBOSOMAL_SUBUNIT	GOCC_SMALL_RIBOSOMAL_SUBUNIT		44	0.49756	1.64658	0.0154321	0.274563	1	2514	tags=50%, list=21%, signal=63%
GOBP_DNA_DOUBLE_STRAND_BREAK_PROCESSING	GOBP_DNA_DOUBLE_STRAND_BREAK_PROCESSING		21	0.599145	1.64587	0.0184211	0.272894	1	2187	tags=33%, list=19%, signal=41%
GOMF_TRNA_METHYLTRANSFERASE_ACTIVITY	GOMF_TRNA_METHYLTRANSFERASE_ACTIVITY		28	0.552365	1.64333	0.0169972	0.275698	1	2546	tags=43%, list=22%, signal=55%
GOCC_DNA_POLYMERASE_COMPLEX	GOCC_DNA_POLYMERASE_COMPLEX		16	0.629923	1.64039	0.0195228	0.278958	1	3815	tags=69%, list=32%, signal=101%
HP_ABNORMAL_RENAL_MEDULLA_MORPHOLOGY	HP_ABNORMAL_RENAL_MEDULLA_MORPHOLOGY		42	0.505714	1.63838	0.00293255	0.280397	1	3315	tags=45%, list=28%, signal=63%
HP_NORMOCHROMIC_ANEMIA	HP_NORMOCHROMIC_ANEMIA		19	0.595348	1.63504	0.0248307	0.285027	1	2012	tags=58%, list=17%, signal=70%
HP_ABNORMAL_BRAINSTEM_MRI_SIGNAL_INTENSITY	HP_ABNORMAL_BRAINSTEM_MRI_SIGNAL_INTENSITY		36	0.517462	1.63438	0.00821918	0.283141	1	3111	tags=47%, list=26%, signal=64%
HP_FOCAL_T2_HYPERINTENSE_BRAINSTEM_LESION	HP_FOCAL_T2_HYPERINTENSE_BRAINSTEM_LESION		30	0.537187	1.63158	0.0215054	0.28645	1	2412	tags=43%, list=20%, signal=54%
GOCC_CYTOSOLIC_SMALL_RIBOSOMAL_SUBUNIT	GOCC_CYTOSOLIC_SMALL_RIBOSOMAL_SUBUNIT		21	0.584763	1.62592	0.0217918	0.295801	1	2184	tags=71%, list=18%, signal=87%
HP_ELEVATED_CIRCULATING_FOLLICLE_STIMULATING_HORMONE_LEVEL	HP_ELEVATED_CIRCULATING_FOLLICLE_STIMULATING_HORMONE_LEVEL		16	0.624345	1.62579	0.0277778	0.292848	1	50	tags=13%, list=0%, signal=13%
GOMF_DNA_POLYMERASE_ACTIVITY	GOMF_DNA_POLYMERASE_ACTIVITY		27	0.555054	1.62509	0.0156658	0.291124	1	4059	tags=67%, list=34%, signal=101%
GOBP_RESPIRATORY_ELECTRON_TRANSPORT_CHAIN	GOBP_RESPIRATORY_ELECTRON_TRANSPORT_CHAIN		88	0.430641	1.6243	0	0.289834	1	2542	tags=30%, list=22%, signal=37%
GOCC_U12_TYPE_SPLICEOSOMAL_COMPLEX	GOCC_U12_TYPE_SPLICEOSOMAL_COMPLEX		22	0.58228	1.62372	0.03125	0.288175	1	1885	tags=36%, list=16%, signal=43%
GOBP_NON_MOTILE_CILIUM_ASSEMBLY	GOBP_NON_MOTILE_CILIUM_ASSEMBLY		37	0.521923	1.62267	0.0116279	0.287737	1	2990	tags=49%, list=25%, signal=65%
GOBP_RNA_CAPPING	GOBP_RNA_CAPPING		29	0.528798	1.62178	0.0158311	0.286573	1	2603	tags=45%, list=22%, signal=57%
GOCC_RESPIRATORY_CHAIN_COMPLEX	GOCC_RESPIRATORY_CHAIN_COMPLEX		63	0.457117	1.62033	0.00606061	0.286794	1	2807	tags=37%, list=24%, signal=48%
HP_INCREASED_MEAN_CORPUSCULAR_VOLUME	HP_INCREASED_MEAN_CORPUSCULAR_VOLUME		25	0.556668	1.61894	0.0149254	0.287201	1	1139	tags=32%, list=10%, signal=35%
GOBP_MISMATCH_REPAIR	GOBP_MISMATCH_REPAIR		26	0.544619	1.61826	0.0217391	0.285798	1	3539	tags=54%, list=30%, signal=77%
HP_ABNORMALITY_OF_LOWER_LIMB_METAPHYSES	HP_ABNORMALITY_OF_LOWER_LIMB_METAPHYSES		18	0.607611	1.61341	0.0303797	0.293999	1	2769	tags=39%, list=23%, signal=51%
GOBP_POSITIVE_REGULATION_OF_HORMONE_SECRETION	GOBP_POSITIVE_REGULATION_OF_HORMONE_SECRETION		69	0.449942	1.61149	0.00632911	0.295609	1	714	tags=17%, list=6%, signal=18%
HP_ABNORMAL_FOVEAL_MORPHOLOGY	HP_ABNORMAL_FOVEAL_MORPHOLOGY		22	0.563681	1.61054	0.0291777	0.294723	1	446	tags=18%, list=4%, signal=19%
GOBP_INTRACILIARY_TRANSPORT	GOBP_INTRACILIARY_TRANSPORT		42	0.49936	1.60273	0.0190736	0.310146	1	1655	tags=38%, list=14%, signal=44%
GOBP_POSTREPLICATION_REPAIR	GOBP_POSTREPLICATION_REPAIR		43	0.49381	1.59924	0.0252809	0.315424	1	2233	tags=30%, list=19%, signal=37%
GSE10500_ARTHRITIC_SYNOVIAL_FLUID_VS_HEALTHY_MACROPHAGE_UP	GSE10500_ARTHRITIC_SYNOVIAL_FLUID_VS_HEALTHY_MACROPHAGE_UP		121	0.405124	1.5983	0.00429185	0.314557	1	1835	tags=31%, list=16%, signal=37%
HP_OSTEOSARCOMA	HP_OSTEOSARCOMA		19	0.589729	1.59773	0.0294118	0.312924	1	2164	tags=63%, list=18%, signal=77%
GOBP_RNA_5_END_PROCESSING	GOBP_RNA_5_END_PROCESSING		21	0.569239	1.59584	0.0170316	0.31439	1	4384	tags=81%, list=37%, signal=128%
HP_AXIAL_MUSCLE_WEAKNESS	HP_AXIAL_MUSCLE_WEAKNESS		18	0.58944	1.5939	0.0190024	0.316154	1	91	tags=11%, list=1%, signal=11%
GOBP_MULTICELLULAR_ORGANISMAL_MOVEMENT	GOBP_MULTICELLULAR_ORGANISMAL_MOVEMENT		31	0.521777	1.59148	0.0138122	0.31899	1	1832	tags=23%, list=16%, signal=27%
GOBP_CYTOPLASMIC_TRANSLATIONAL_INITIATION	GOBP_CYTOPLASMIC_TRANSLATIONAL_INITIATION		29	0.531432	1.59121	0.016	0.316778	1	2294	tags=41%, list=19%, signal=51%
GOMF_VITAMIN_TRANSMEMBRANE_TRANSPORTER_ACTIVITY	GOMF_VITAMIN_TRANSMEMBRANE_TRANSPORTER_ACTIVITY		19	0.586487	1.59077	0.0289474	0.314899	1	432	tags=16%, list=4%, signal=16%
HP_HYPOVENTILATION	HP_HYPOVENTILATION		28	0.526581	1.59038	0.0257009	0.312886	1	1898	tags=32%, list=16%, signal=38%
HP_MUSCLE_HYPERTROPHY_OF_THE_LOWER_EXTREMITIES	HP_MUSCLE_HYPERTROPHY_OF_THE_LOWER_EXTREMITIES		36	0.512064	1.58658	0.0135501	0.319422	1	828	tags=19%, list=7%, signal=21%
GOBP_INTERSTRAND_CROSS_LINK_REPAIR	GOBP_INTERSTRAND_CROSS_LINK_REPAIR		43	0.487337	1.58449	0.0189702	0.321617	1	2584	tags=37%, list=22%, signal=47%
GOBP_ERROR_PRONE_TRANSLESION_SYNTHESIS	GOBP_ERROR_PRONE_TRANSLESION_SYNTHESIS		18	0.581498	1.58236	0.0533981	0.323998	1	1925	tags=33%, list=16%, signal=40%
GOBP_HOMOLOGOUS_RECOMBINATION	GOBP_HOMOLOGOUS_RECOMBINATION		35	0.503835	1.57276	0.0300546	0.34502	1	4608	tags=69%, list=39%, signal=112%
HP_ABNORMAL_ACTIVITY_OF_MITOCHONDRIAL_RESPIRATORY_CHAIN	HP_ABNORMAL_ACTIVITY_OF_MITOCHONDRIAL_RESPIRATORY_CHAIN		71	0.431852	1.56846	0.00993378	0.353008	1	2931	tags=38%, list=25%, signal=50%
GOBP_DNA_REPAIR	GOBP_DNA_REPAIR		458	0.337492	1.56826	0	0.350379	1	3825	tags=40%, list=32%, signal=57%
GOBP_ACYLGLYCEROL_HOMEOSTASIS	GOBP_ACYLGLYCEROL_HOMEOSTASIS		17	0.60886	1.56807	0.048718	0.347847	1	1225	tags=29%, list=10%, signal=33%
GOCC_PROTON_TRANSPORTING_TWO_SECTOR_ATPASE_COMPLEX_PROTON_TRANSPORTING_DOMAIN	GOCC_PROTON_TRANSPORTING_TWO_SECTOR_ATPASE_COMPLEX_PROTON_TRANSPORTING_DOMAIN		19	0.574977	1.56268	0.0350877	0.358862	1	1415	tags=32%, list=12%, signal=36%
HP_PARTIAL_DUPLICATION_OF_THE_PHALANX_OF_HAND	HP_PARTIAL_DUPLICATION_OF_THE_PHALANX_OF_HAND		25	0.530702	1.56052	0.0275	0.361877	1	2012	tags=48%, list=17%, signal=58%
GOBP_RNA_METHYLATION	GOBP_RNA_METHYLATION		71	0.437271	1.5584	0.0107527	0.36434	1	3868	tags=46%, list=33%, signal=69%
GSE21546_UNSTIM_VS_ANTI_CD3_STIM_SAP1A_KO_DP_THYMOCYTES_DN	GSE21546_UNSTIM_VS_ANTI_CD3_STIM_SAP1A_KO_DP_THYMOCYTES_DN		71	0.427229	1.55341	0.0121212	0.374865	1	1408	tags=25%, list=12%, signal=29%
HP_DROWSINESS	HP_DROWSINESS		20	0.56445	1.54911	0.0275689	0.383784	1	1375	tags=35%, list=12%, signal=40%
HP_CHILDHOOD_ONSET	HP_CHILDHOOD_ONSET		74	0.42376	1.5477	0.0033557	0.384604	1	318	tags=9%, list=3%, signal=10%
GOMF_DNA_DIRECTED_DNA_POLYMERASE_ACTIVITY	GOMF_DNA_DIRECTED_DNA_POLYMERASE_ACTIVITY		22	0.545621	1.54659	0.0456853	0.384544	1	3777	tags=59%, list=32%, signal=87%
GOMF_NAD_BINDING	GOMF_NAD_BINDING		44	0.462858	1.54415	0.0235294	0.388459	1	1314	tags=25%, list=11%, signal=28%
GOCC_RESPIRASOME	GOCC_RESPIRASOME		73	0.426976	1.54107	0.0142349	0.394057	1	3554	tags=42%, list=30%, signal=60%
GSE14413_UNSTIM_VS_IFNB_STIM_RAW264_CELLS_DN	GSE14413_UNSTIM_VS_IFNB_STIM_RAW264_CELLS_DN		59	0.444048	1.54099	0.02	0.39123	1	532	tags=20%, list=5%, signal=21%
HP_ABNORMALITY_OF_CHROMOSOME_STABILITY	HP_ABNORMALITY_OF_CHROMOSOME_STABILITY		45	0.465299	1.53894	0.0243161	0.394024	1	3135	tags=49%, list=27%, signal=66%
GOCC_INTRINSIC_COMPONENT_OF_MITOCHONDRIAL_INNER_MEMBRANE	GOCC_INTRINSIC_COMPONENT_OF_MITOCHONDRIAL_INNER_MEMBRANE		44	0.462004	1.53607	0.0117302	0.39921	1	3305	tags=50%, list=28%, signal=69%
GOCC_SM_LIKE_PROTEIN_FAMILY_COMPLEX	GOCC_SM_LIKE_PROTEIN_FAMILY_COMPLEX		65	0.433245	1.53588	0.00928793	0.396826	1	2331	tags=32%, list=20%, signal=40%
GOMF_DAMAGED_DNA_BINDING	GOMF_DAMAGED_DNA_BINDING		61	0.434793	1.53374	0.0236487	0.400155	1	3824	tags=44%, list=32%, signal=65%
GOMF_RNA_METHYLTRANSFERASE_ACTIVITY	GOMF_RNA_METHYLTRANSFERASE_ACTIVITY		58	0.439571	1.53307	0.015528	0.399061	1	2546	tags=33%, list=22%, signal=42%
GOMF_TRANSLATION_INITIATION_FACTOR_ACTIVITY	GOMF_TRANSLATION_INITIATION_FACTOR_ACTIVITY		42	0.462564	1.53291	0.0257143	0.396495	1	2294	tags=38%, list=19%, signal=47%
GOCC_PRECATALYTIC_SPLICEOSOME	GOCC_PRECATALYTIC_SPLICEOSOME		41	0.477333	1.53182	0.0290237	0.39673	1	1549	tags=24%, list=13%, signal=28%
GOBP_SPLICEOSOMAL_SNRNP_ASSEMBLY	GOBP_SPLICEOSOMAL_SNRNP_ASSEMBLY		31	0.503409	1.53146	0.0265252	0.394951	1	1148	tags=23%, list=10%, signal=25%
GOBP_PROTEIN_NEDDYLATION	GOBP_PROTEIN_NEDDYLATION		15	0.592286	1.53128	0.0604534	0.392529	1	2652	tags=67%, list=22%, signal=86%
HP_APLASIA_HYPOPLASIA_OF_THE_LUNGS	HP_APLASIA_HYPOPLASIA_OF_THE_LUNGS		104	0.400086	1.53027	0.00757576	0.392543	1	1853	tags=21%, list=16%, signal=25%
GOCC_SNO_S_RNA_CONTAINING_RIBONUCLEOPROTEIN_COMPLEX	GOCC_SNO_S_RNA_CONTAINING_RIBONUCLEOPROTEIN_COMPLEX		21	0.541608	1.53008	0.056701	0.390217	1	3416	tags=52%, list=29%, signal=74%
GOCC_SWI_SNF_SUPERFAMILY_TYPE_COMPLEX	GOCC_SWI_SNF_SUPERFAMILY_TYPE_COMPLEX		65	0.428993	1.5298	0.0162866	0.388099	1	3974	tags=45%, list=34%, signal=67%
GOCC_NADH_DEHYDROGENASE_COMPLEX	GOCC_NADH_DEHYDROGENASE_COMPLEX		39	0.480577	1.52973	0.0267062	0.385586	1	2243	tags=31%, list=19%, signal=38%
GOBP_INNER_MITOCHONDRIAL_MEMBRANE_ORGANIZATION	GOBP_INNER_MITOCHONDRIAL_MEMBRANE_ORGANIZATION		44	0.455048	1.52953	0.0186916	0.383501	1	1949	tags=34%, list=16%, signal=41%
GOBP_PEPTIDYL_GLUTAMIC_ACID_MODIFICATION	GOBP_PEPTIDYL_GLUTAMIC_ACID_MODIFICATION		19	0.565322	1.52894	0.0435897	0.382372	1	2997	tags=58%, list=25%, signal=77%
HP_INCREASED_CONNECTIVE_TISSUE	HP_INCREASED_CONNECTIVE_TISSUE		19	0.563557	1.52746	0.0433735	0.384012	1	391	tags=21%, list=3%, signal=22%
GOBP_MITOCHONDRIAL_TRANSCRIPTION	GOBP_MITOCHONDRIAL_TRANSCRIPTION		15	0.592138	1.5256	0.0479616	0.386073	1	3150	tags=53%, list=27%, signal=73%
HP_BROAD_RIBS	HP_BROAD_RIBS		16	0.581845	1.52477	0.0439815	0.385708	1	515	tags=25%, list=4%, signal=26%
HP_ABSENCE_OF_SECONDARY_SEX_CHARACTERISTICS	HP_ABSENCE_OF_SECONDARY_SEX_CHARACTERISTICS		21	0.552629	1.52451	0.0440835	0.383848	1	603	tags=24%, list=5%, signal=25%
HP_NEPHROCALCINOSIS	HP_NEPHROCALCINOSIS		48	0.45292	1.52432	0.0236686	0.381744	1	1781	tags=27%, list=15%, signal=32%
GOBP_TRNA_METABOLIC_PROCESS	GOBP_TRNA_METABOLIC_PROCESS		157	0.370149	1.52224	0	0.385003	1	2939	tags=33%, list=25%, signal=44%
GSE37605_TREG_VS_TCONV_C57BL6_FOXP3_IRES_GFP_DN	GSE37605_TREG_VS_TCONV_C57BL6_FOXP3_IRES_GFP_DN		114	0.391146	1.52218	0.00843882	0.382539	1	2384	tags=33%, list=20%, signal=41%
HP_APLASIA_HYPOPLASIA_OF_THE_UVULA	HP_APLASIA_HYPOPLASIA_OF_THE_UVULA		23	0.526045	1.52003	0.0434783	0.385635	1	3942	tags=65%, list=33%, signal=98%
GOMF_HYDROLASE_ACTIVITY_ACTING_ON_CARBON_NITROGEN_BUT_NOT_PEPTIDE_BONDS_IN_LINEAR_AMIDES	GOMF_HYDROLASE_ACTIVITY_ACTING_ON_CARBON_NITROGEN_BUT_NOT_PEPTIDE_BONDS_IN_LINEAR_AMIDES		44	0.468996	1.5186	0.0288184	0.386753	1	1680	tags=25%, list=14%, signal=29%
GOMF_OXIDOREDUCTASE_ACTIVITY_ACTING_ON_NAD_P_H_QUINONE_OR_SIMILAR_COMPOUND_AS_ACCEPTOR	GOMF_OXIDOREDUCTASE_ACTIVITY_ACTING_ON_NAD_P_H_QUINONE_OR_SIMILAR_COMPOUND_AS_ACCEPTOR		45	0.46369	1.51804	0.0253165	0.385755	1	2540	tags=36%, list=22%, signal=45%
HP_SPINAL_CORD_COMPRESSION	HP_SPINAL_CORD_COMPRESSION		20	0.554442	1.5142	0.0447059	0.394047	1	514	tags=15%, list=4%, signal=16%
HP_GONADAL_DYSGENESIS	HP_GONADAL_DYSGENESIS		23	0.535454	1.51403	0.0481013	0.391966	1	50	tags=9%, list=0%, signal=9%
GSE34156_NOD2_LIGAND_VS_NOD2_AND_TLR1_TLR2_LIGAND_24H_TREATED_MONOCYTE_DN	GSE34156_NOD2_LIGAND_VS_NOD2_AND_TLR1_TLR2_LIGAND_24H_TREATED_MONOCYTE_DN		142	0.376395	1.5119	0.0052356	0.395214	1	2851	tags=36%, list=24%, signal=47%
GOBP_NEGATIVE_REGULATION_OF_DNA_REPAIR	GOBP_NEGATIVE_REGULATION_OF_DNA_REPAIR		28	0.493141	1.51115	0.0380048	0.394749	1	3548	tags=46%, list=30%, signal=66%
GOBP_MATURATION_OF_SSU_RRNA_FROM_TRICISTRONIC_RRNA_TRANSCRIPT_SSU_RRNA_5_8S_RRNA_LSU_RRNA	GOBP_MATURATION_OF_SSU_RRNA_FROM_TRICISTRONIC_RRNA_TRANSCRIPT_SSU_RRNA_5_8S_RRNA_LSU_RRNA		31	0.489665	1.50605	0.0354223	0.406389	1	3548	tags=48%, list=30%, signal=69%
HP_SEVERELY_REDUCED_VISUAL_ACUITY	HP_SEVERELY_REDUCED_VISUAL_ACUITY		16	0.579161	1.50508	0.0469136	0.406696	1	1936	tags=50%, list=16%, signal=60%
GOBP_NEGATIVE_REGULATION_OF_CARBOHYDRATE_METABOLIC_PROCESS	GOBP_NEGATIVE_REGULATION_OF_CARBOHYDRATE_METABOLIC_PROCESS		35	0.473619	1.50317	0.0237467	0.409769	1	303	tags=11%, list=3%, signal=12%
GSE16386_IL4_VS_IL4_AND_ROSIGLITAZONE_STIM_MACROPHAGE_6H_DN	GSE16386_IL4_VS_IL4_AND_ROSIGLITAZONE_STIM_MACROPHAGE_6H_DN		105	0.385595	1.50233	0.0152672	0.409534	1	1709	tags=30%, list=14%, signal=34%
GOMF_DEACETYLASE_ACTIVITY	GOMF_DEACETYLASE_ACTIVITY		29	0.505134	1.50173	0.0461957	0.408689	1	1740	tags=28%, list=15%, signal=32%
GOMF_TRANSFERASE_ACTIVITY_TRANSFERRING_ONE_CARBON_GROUPS	GOMF_TRANSFERASE_ACTIVITY_TRANSFERRING_ONE_CARBON_GROUPS		176	0.359979	1.50076	0	0.408946	1	3660	tags=41%, list=31%, signal=59%
GSE18893_TCONV_VS_TREG_24H_TNF_STIM_DN	GSE18893_TCONV_VS_TREG_24H_TNF_STIM_DN		140	0.375261	1.50028	0.00862069	0.407746	1	2653	tags=35%, list=22%, signal=45%
KEGG_SNARE_INTERACTIONS_IN_VESICULAR_TRANSPORT	KEGG_SNARE_INTERACTIONS_IN_VESICULAR_TRANSPORT		31	0.495582	1.49973	0.0393258	0.406871	1	3900	tags=65%, list=33%, signal=96%
GOBP_NEGATIVE_REGULATION_OF_SMALL_MOLECULE_METABOLIC_PROCESS	GOBP_NEGATIVE_REGULATION_OF_SMALL_MOLECULE_METABOLIC_PROCESS		60	0.427872	1.49837	0.0122699	0.408149	1	1268	tags=23%, list=11%, signal=26%
GOCC_PRERIBOSOME	GOCC_PRERIBOSOME		64	0.422354	1.49793	0.0103448	0.40671	1	3591	tags=44%, list=30%, signal=63%
GOBP_TRNA_5_END_PROCESSING	GOBP_TRNA_5_END_PROCESSING		15	0.580476	1.49732	0.0686499	0.405906	1	3868	tags=73%, list=33%, signal=109%
GOBP_REGULATION_OF_MITOCHONDRIAL_GENE_EXPRESSION	GOBP_REGULATION_OF_MITOCHONDRIAL_GENE_EXPRESSION		29	0.499101	1.49607	0.048913	0.407054	1	2611	tags=45%, list=22%, signal=57%
GOBP_RNA_MODIFICATION	GOBP_RNA_MODIFICATION		138	0.381104	1.49422	0.00490196	0.409964	1	2939	tags=33%, list=25%, signal=43%
GSE13485_DAY1_VS_DAY21_YF17D_VACCINE_PBMC_DN	GSE13485_DAY1_VS_DAY21_YF17D_VACCINE_PBMC_DN		159	0.364239	1.49182	0	0.414345	1	2591	tags=40%, list=22%, signal=50%
HP_ABNORMAL_EPIPHYSIS_MORPHOLOGY_OF_THE_PHALANGES_OF_THE_HAND	HP_ABNORMAL_EPIPHYSIS_MORPHOLOGY_OF_THE_PHALANGES_OF_THE_HAND		28	0.507878	1.49166	0.0574413	0.412397	1	1047	tags=21%, list=9%, signal=23%
HP_MACROCYTIC_ANEMIA	HP_MACROCYTIC_ANEMIA		41	0.453647	1.49052	0.0409357	0.413002	1	1139	tags=24%, list=10%, signal=27%
GOMF_STRUCTURAL_CONSTITUENT_OF_MUSCLE	GOMF_STRUCTURAL_CONSTITUENT_OF_MUSCLE		28	0.496545	1.48968	0.0578947	0.412968	1	91	tags=11%, list=1%, signal=11%
HP_ABNORMALITY_OF_THE_FRONTAL_HAIRLINE	HP_ABNORMALITY_OF_THE_FRONTAL_HAIRLINE		115	0.376888	1.48965	0.00719425	0.410652	1	2987	tags=34%, list=25%, signal=45%
GOCC_SPLICEOSOMAL_TRI_SNRNP_COMPLEX	GOCC_SPLICEOSOMAL_TRI_SNRNP_COMPLEX		24	0.51949	1.48798	0.0595855	0.412943	1	1535	tags=29%, list=13%, signal=33%
HP_OLIGOSPERMIA	HP_OLIGOSPERMIA		15	0.574738	1.48692	0.0613208	0.413436	1	455	tags=27%, list=4%, signal=28%
GOMF_NUCLEOSOMAL_DNA_BINDING	GOMF_NUCLEOSOMAL_DNA_BINDING		20	0.538287	1.48202	0.075	0.42523	1	2743	tags=35%, list=23%, signal=46%
HP_HYPERGONADOTROPIC_HYPOGONADISM	HP_HYPERGONADOTROPIC_HYPOGONADISM		40	0.461955	1.48184	0.0265487	0.423383	1	2074	tags=28%, list=18%, signal=33%
HP_DUODENAL_STENOSIS	HP_DUODENAL_STENOSIS		26	0.511446	1.47953	0.0410256	0.427485	1	2023	tags=31%, list=17%, signal=37%
HP_ABNORMALITY_OF_VITAMIN_D_METABOLISM	HP_ABNORMALITY_OF_VITAMIN_D_METABOLISM		25	0.50693	1.4794	0.0410959	0.425501	1	376	tags=20%, list=3%, signal=21%
GSE1740_MCSF_VS_MCSF_AND_IFNG_DAY2_DERIVED_MACROPHAGE_WITH_IFNA_STIM_DN	GSE1740_MCSF_VS_MCSF_AND_IFNG_DAY2_DERIVED_MACROPHAGE_WITH_IFNA_STIM_DN		94	0.385888	1.477	0.010989	0.430186	1	1809	tags=21%, list=15%, signal=25%
GOMF_TRANSLATION_FACTOR_ACTIVITY_RNA_BINDING	GOMF_TRANSLATION_FACTOR_ACTIVITY_RNA_BINDING		69	0.415745	1.47674	0.02	0.428607	1	2294	tags=32%, list=19%, signal=39%
GSE14000_TRANSLATED_RNA_VS_MRNA_4H_LPS_DC_UP	GSE14000_TRANSLATED_RNA_VS_MRNA_4H_LPS_DC_UP		171	0.359692	1.47657	0	0.426774	1	3581	tags=40%, list=30%, signal=56%
GOBP_ESTABLISHMENT_OF_PROTEIN_LOCALIZATION_TO_TELOMERE	GOBP_ESTABLISHMENT_OF_PROTEIN_LOCALIZATION_TO_TELOMERE		16	0.565062	1.47302	0.0816327	0.435382	1	1845	tags=31%, list=16%, signal=37%
HP_ABNORMAL_SHAPE_OF_THE_PALPEBRAL_FISSURE	HP_ABNORMAL_SHAPE_OF_THE_PALPEBRAL_FISSURE		35	0.458048	1.47206	0.0546448	0.435859	1	4053	tags=54%, list=34%, signal=82%
HP_DECREASED_ACTIVITY_OF_MITOCHONDRIAL_COMPLEX_I	HP_DECREASED_ACTIVITY_OF_MITOCHONDRIAL_COMPLEX_I		44	0.441779	1.47186	0.0473538	0.434148	1	4083	tags=55%, list=35%, signal=83%
GSE30971_2H_VS_4H_LPS_STIM_MACROPHAGE_WBP7_HET_UP	GSE30971_2H_VS_4H_LPS_STIM_MACROPHAGE_WBP7_HET_UP		127	0.361921	1.47167	0.00398406	0.432445	1	2991	tags=39%, list=25%, signal=51%
GOMF_PROTEIN_DEACETYLASE_ACTIVITY	GOMF_PROTEIN_DEACETYLASE_ACTIVITY		20	0.534815	1.47095	0.0594059	0.432156	1	1267	tags=20%, list=11%, signal=22%
GOMF_TRANSLATION_REGULATOR_ACTIVITY_NUCLEIC_ACID_BINDING	GOMF_TRANSLATION_REGULATOR_ACTIVITY_NUCLEIC_ACID_BINDING		82	0.401275	1.46903	0.0199336	0.435734	1	2294	tags=30%, list=19%, signal=38%
HP_ABNORMAL_MEAN_CORPUSCULAR_VOLUME	HP_ABNORMAL_MEAN_CORPUSCULAR_VOLUME		32	0.482325	1.46788	0.0601093	0.436754	1	2012	tags=34%, list=17%, signal=41%
GSE18791_CTRL_VS_NEWCASTLE_VIRUS_DC_6H_UP	GSE18791_CTRL_VS_NEWCASTLE_VIRUS_DC_6H_UP		162	0.355025	1.46696	0.00452489	0.437178	1	2685	tags=32%, list=23%, signal=41%
GOCC_EUKARYOTIC_TRANSLATION_INITIATION_FACTOR_3_COMPLEX	GOCC_EUKARYOTIC_TRANSLATION_INITIATION_FACTOR_3_COMPLEX		16	0.560182	1.46672	0.0872483	0.435599	1	2294	tags=44%, list=19%, signal=54%
GOBP_PROTEIN_TARGETING_TO_MEMBRANE	GOBP_PROTEIN_TARGETING_TO_MEMBRANE		123	0.36839	1.46643	0.00440529	0.434135	1	2012	tags=33%, list=17%, signal=40%
GOMF_NAD_P_H_DEHYDROGENASE_QUINONE_ACTIVITY	GOMF_NAD_P_H_DEHYDROGENASE_QUINONE_ACTIVITY		39	0.467503	1.46642	0.0539773	0.431925	1	2243	tags=31%, list=19%, signal=38%
GOMF_ENDORIBONUCLEASE_ACTIVITY_PRODUCING_5_PHOSPHOMONOESTERS	GOMF_ENDORIBONUCLEASE_ACTIVITY_PRODUCING_5_PHOSPHOMONOESTERS		25	0.501861	1.46288	0.065534	0.440016	1	3539	tags=56%, list=30%, signal=80%
GSE28237_FOLLICULAR_VS_EARLY_GC_BCELL_UP	GSE28237_FOLLICULAR_VS_EARLY_GC_BCELL_UP		156	0.356528	1.46077	0.00452489	0.444157	1	2818	tags=29%, list=24%, signal=37%
GOBP_CILIUM_ORGANIZATION	GOBP_CILIUM_ORGANIZATION		297	0.334547	1.46047	0	0.442749	1	3065	tags=40%, list=26%, signal=52%
GOBP_BASE_EXCISION_REPAIR	GOBP_BASE_EXCISION_REPAIR		35	0.467406	1.45875	0.0538244	0.445525	1	3824	tags=46%, list=32%, signal=67%
HP_FURROWED_TONGUE	HP_FURROWED_TONGUE		27	0.494341	1.45514	0.0673575	0.453812	1	2555	tags=37%, list=22%, signal=47%
GOCC_TRANSLATION_PREINITIATION_COMPLEX	GOCC_TRANSLATION_PREINITIATION_COMPLEX		17	0.549083	1.4533	0.0688836	0.457112	1	1468	tags=35%, list=12%, signal=40%
GOCC_RNA_POLYMERASE_COMPLEX	GOCC_RNA_POLYMERASE_COMPLEX		83	0.389598	1.45326	0.020339	0.454948	1	3587	tags=39%, list=30%, signal=55%
GAUCHER_PBMC_YF_VAX_STAMARIL_UNKNOWN_AGE_3DY_DN	GAUCHER_PBMC_YF_VAX_STAMARIL_UNKNOWN_AGE_3DY_DN		81	0.394217	1.44996	0.0334573	0.462943	1	1544	tags=28%, list=13%, signal=32%
KEGG_NUCLEOTIDE_EXCISION_REPAIR	KEGG_NUCLEOTIDE_EXCISION_REPAIR		38	0.453012	1.44833	0.0630373	0.465577	1	3792	tags=47%, list=32%, signal=70%
HP_GENERALIZED_HYPOPIGMENTATION_OF_HAIR	HP_GENERALIZED_HYPOPIGMENTATION_OF_HAIR		28	0.491075	1.44649	0.0612813	0.468901	1	2757	tags=36%, list=23%, signal=46%
HP_TRIPHALANGEAL_THUMB	HP_TRIPHALANGEAL_THUMB		49	0.427928	1.44536	0.0416667	0.470256	1	2023	tags=41%, list=17%, signal=49%
GOBP_POSITIVE_REGULATION_OF_MITOCHONDRIAL_TRANSLATION	GOBP_POSITIVE_REGULATION_OF_MITOCHONDRIAL_TRANSLATION		16	0.555575	1.44411	0.0645161	0.471794	1	4185	tags=75%, list=35%, signal=116%
HP_FATTY_REPLACEMENT_OF_SKELETAL_MUSCLE	HP_FATTY_REPLACEMENT_OF_SKELETAL_MUSCLE		18	0.527239	1.44133	0.0732861	0.477819	1	1074	tags=22%, list=9%, signal=24%
HP_BILATERAL_MICROPHTHALMOS	HP_BILATERAL_MICROPHTHALMOS		16	0.560576	1.43906	0.0992736	0.482772	1	93	tags=13%, list=1%, signal=13%
HP_EXTERNAL_EAR_MALFORMATION	HP_EXTERNAL_EAR_MALFORMATION		67	0.404646	1.43878	0.0212766	0.481228	1	2400	tags=36%, list=20%, signal=45%
GOBP_POSITIVE_REGULATION_OF_PEPTIDE_HORMONE_SECRETION	GOBP_POSITIVE_REGULATION_OF_PEPTIDE_HORMONE_SECRETION		50	0.424618	1.43788	0.0681115	0.481854	1	714	tags=18%, list=6%, signal=19%
GOBP_DNA_DAMAGE_RESPONSE_DETECTION_OF_DNA_DAMAGE	GOBP_DNA_DAMAGE_RESPONSE_DETECTION_OF_DNA_DAMAGE		29	0.486334	1.43768	0.0646067	0.480231	1	2030	tags=24%, list=17%, signal=29%
HP_MOLAR_TOOTH_SIGN_ON_MRI	HP_MOLAR_TOOTH_SIGN_ON_MRI		32	0.476309	1.43697	0.0606061	0.480205	1	4509	tags=59%, list=38%, signal=96%
GAUCHER_PBMC_YF_VAX_STAMARIL_UNKNOWN_AGE_7DY_DN	GAUCHER_PBMC_YF_VAX_STAMARIL_UNKNOWN_AGE_7DY_DN		133	0.358204	1.43623	0.00760456	0.480183	1	1544	tags=28%, list=13%, signal=32%
SCHERER_PBMC_YF_VAX_AGE_18_40YO_4_TO_7DY_DN	SCHERER_PBMC_YF_VAX_AGE_18_40YO_4_TO_7DY_DN		177	0.348426	1.43559	0	0.479889	1	2113	tags=25%, list=18%, signal=30%
HP_ABNORMALITY_OF_UPPER_LIMB_EPIPHYSIS_MORPHOLOGY	HP_ABNORMALITY_OF_UPPER_LIMB_EPIPHYSIS_MORPHOLOGY		37	0.454795	1.4353	0.0422535	0.478576	1	1047	tags=16%, list=9%, signal=18%
GOBP_CENTROSOME_DUPLICATION	GOBP_CENTROSOME_DUPLICATION		59	0.410906	1.43431	0.0314465	0.479507	1	3951	tags=56%, list=33%, signal=84%
GOCC_H4_H2A_HISTONE_ACETYLTRANSFERASE_COMPLEX	GOCC_H4_H2A_HISTONE_ACETYLTRANSFERASE_COMPLEX		17	0.551956	1.43313	0.10628	0.481001	1	4952	tags=76%, list=42%, signal=131%
GOBP_MITOCHONDRIAL_RNA_METABOLIC_PROCESS	GOBP_MITOCHONDRIAL_RNA_METABOLIC_PROCESS		45	0.436305	1.42743	0.0619469	0.496823	1	3150	tags=40%, list=27%, signal=54%
GOBP_PROTEIN_TRANSMEMBRANE_IMPORT_INTO_INTRACELLULAR_ORGANELLE	GOBP_PROTEIN_TRANSMEMBRANE_IMPORT_INTO_INTRACELLULAR_ORGANELLE		26	0.488052	1.42641	0.0673854	0.497864	1	2817	tags=50%, list=24%, signal=66%
GSE41978_ID2_KO_VS_ID2_KO_AND_BIM_KO_KLRG1_LOW_EFFECTOR_CD8_TCELL_DN	GSE41978_ID2_KO_VS_ID2_KO_AND_BIM_KO_KLRG1_LOW_EFFECTOR_CD8_TCELL_DN		139	0.351364	1.42145	0.0125	0.511803	1	1600	tags=24%, list=14%, signal=28%
GOBP_OXIDATIVE_PHOSPHORYLATION	GOBP_OXIDATIVE_PHOSPHORYLATION		108	0.373046	1.42041	0.012	0.51298	1	3622	tags=41%, list=31%, signal=58%
HP_MITOCHONDRIAL_MYOPATHY	HP_MITOCHONDRIAL_MYOPATHY		48	0.426411	1.42011	0.0443213	0.511666	1	4083	tags=52%, list=35%, signal=79%
GSE27241_WT_VS_RORGT_KO_TH17_POLARIZED_CD4_TCELL_DN	GSE27241_WT_VS_RORGT_KO_TH17_POLARIZED_CD4_TCELL_DN		135	0.359526	1.42003	0.00446429	0.509671	1	2257	tags=30%, list=19%, signal=36%
GOMF_S_ADENOSYLMETHIONINE_DEPENDENT_METHYLTRANSFERASE_ACTIVITY	GOMF_S_ADENOSYLMETHIONINE_DEPENDENT_METHYLTRANSFERASE_ACTIVITY		130	0.359629	1.41863	0.0285714	0.511984	1	3660	tags=42%, list=31%, signal=61%
GOBP_DNA_GEOMETRIC_CHANGE	GOBP_DNA_GEOMETRIC_CHANGE		99	0.367219	1.4182	0.0245614	0.511144	1	3640	tags=40%, list=31%, signal=58%
KEGG_PARKINSONS_DISEASE	KEGG_PARKINSONS_DISEASE		92	0.370239	1.41802	0.0162866	0.509469	1	2243	tags=23%, list=19%, signal=28%
GOBP_NUCLEOTIDE_EXCISION_REPAIR_PREINCISION_COMPLEX_ASSEMBLY	GOBP_NUCLEOTIDE_EXCISION_REPAIR_PREINCISION_COMPLEX_ASSEMBLY		23	0.509767	1.4173	0.0779221	0.509627	1	3522	tags=57%, list=30%, signal=80%
GOMF_CATALYTIC_ACTIVITY_ACTING_ON_A_TRNA	GOMF_CATALYTIC_ACTIVITY_ACTING_ON_A_TRNA		108	0.371176	1.41403	0.0339623	0.518149	1	2939	tags=35%, list=25%, signal=46%
GOCC_CHROMOSOME_TELOMERIC_REGION	GOCC_CHROMOSOME_TELOMERIC_REGION		115	0.358464	1.41304	0.0285714	0.519264	1	2498	tags=23%, list=21%, signal=29%
GSE5679_PPARG_LIGAND_ROSIGLITAZONE_VS_RARA_AGONIST_AM580_TREATED_DC_UP	GSE5679_PPARG_LIGAND_ROSIGLITAZONE_VS_RARA_AGONIST_AM580_TREATED_DC_UP		163	0.345224	1.41292	0.00985222	0.51738	1	2526	tags=32%, list=21%, signal=40%
HP_GASTROINTESTINAL_CARCINOMA	HP_GASTROINTESTINAL_CARCINOMA		53	0.407383	1.41059	0.045977	0.522911	1	1139	tags=23%, list=10%, signal=25%
KEGG_BASE_EXCISION_REPAIR	KEGG_BASE_EXCISION_REPAIR		29	0.467753	1.40825	0.0605263	0.528462	1	3089	tags=38%, list=26%, signal=51%
GOCC_SMALL_NUCLEAR_RIBONUCLEOPROTEIN_COMPLEX	GOCC_SMALL_NUCLEAR_RIBONUCLEOPROTEIN_COMPLEX		56	0.402961	1.40763	0.063253	0.52828	1	2331	tags=29%, list=20%, signal=35%
GOMF_ENDODEOXYRIBONUCLEASE_ACTIVITY	GOMF_ENDODEOXYRIBONUCLEASE_ACTIVITY		30	0.476239	1.40754	0.0567568	0.526329	1	2340	tags=33%, list=20%, signal=41%
HP_HORSESHOE_KIDNEY	HP_HORSESHOE_KIDNEY		56	0.405923	1.40743	0.0476191	0.524484	1	2023	tags=38%, list=17%, signal=45%
GOBP_MITOCHONDRIAL_CYTOCHROME_C_OXIDASE_ASSEMBLY	GOBP_MITOCHONDRIAL_CYTOCHROME_C_OXIDASE_ASSEMBLY		18	0.531497	1.40734	0.104408	0.52258	1	3617	tags=61%, list=31%, signal=88%
HP_ABNORMAL_SCAPULA_MORPHOLOGY	HP_ABNORMAL_SCAPULA_MORPHOLOGY		102	0.364708	1.40567	0.0223881	0.525969	1	1142	tags=18%, list=10%, signal=19%
GOCC_DNA_REPAIR_COMPLEX	GOCC_DNA_REPAIR_COMPLEX		33	0.448363	1.40562	0.0732984	0.523925	1	3760	tags=45%, list=32%, signal=66%
HP_INCREASED_SERUM_PYRUVATE	HP_INCREASED_SERUM_PYRUVATE		43	0.431758	1.40461	0.0512821	0.525092	1	4083	tags=51%, list=35%, signal=78%
HP_INFERTILITY	HP_INFERTILITY		81	0.375753	1.4043	0.0299003	0.523955	1	1826	tags=33%, list=15%, signal=39%
GOBP_CYTOCHROME_COMPLEX_ASSEMBLY	GOBP_CYTOCHROME_COMPLEX_ASSEMBLY		31	0.456511	1.40356	0.0733496	0.52426	1	3617	tags=52%, list=31%, signal=74%
GOBP_LONG_CHAIN_FATTY_ACID_BIOSYNTHETIC_PROCESS	GOBP_LONG_CHAIN_FATTY_ACID_BIOSYNTHETIC_PROCESS		15	0.546607	1.40325	0.0990099	0.523112	1	1352	tags=33%, list=11%, signal=38%
HP_MYELODYSPLASIA	HP_MYELODYSPLASIA		77	0.379638	1.40249	0.0233333	0.523485	1	3008	tags=40%, list=25%, signal=54%
GOBP_TRANSCRIPTION_COUPLED_NUCLEOTIDE_EXCISION_REPAIR	GOBP_TRANSCRIPTION_COUPLED_NUCLEOTIDE_EXCISION_REPAIR		61	0.408157	1.39836	0.0385852	0.535269	1	1983	tags=26%, list=17%, signal=31%
GSE18893_TCONV_VS_TREG_24H_TNF_STIM_UP	GSE18893_TCONV_VS_TREG_24H_TNF_STIM_UP		166	0.337677	1.3983	0	0.533261	1	4082	tags=47%, list=35%, signal=71%
GOBP_DOUBLE_STRAND_BREAK_REPAIR	GOBP_DOUBLE_STRAND_BREAK_REPAIR		215	0.32512	1.39564	0.0170455	0.540357	1	3817	tags=40%, list=32%, signal=57%
GOBP_MITOCHONDRIAL_ELECTRON_TRANSPORT_NADH_TO_UBIQUINONE	GOBP_MITOCHONDRIAL_ELECTRON_TRANSPORT_NADH_TO_UBIQUINONE		43	0.431338	1.39483	0.0547945	0.541055	1	2243	tags=28%, list=19%, signal=34%
GSE17974_2H_VS_72H_UNTREATED_IN_VITRO_CD4_TCELL_DN	GSE17974_2H_VS_72H_UNTREATED_IN_VITRO_CD4_TCELL_DN		161	0.339153	1.39453	0.00985222	0.539982	1	2267	tags=32%, list=19%, signal=39%
GOMF_NUCLEOTIDYLTRANSFERASE_ACTIVITY	GOMF_NUCLEOTIDYLTRANSFERASE_ACTIVITY		102	0.366255	1.39418	0.0323887	0.538963	1	2407	tags=28%, list=20%, signal=35%
GOMF_SNAP_RECEPTOR_ACTIVITY	GOMF_SNAP_RECEPTOR_ACTIVITY		29	0.473414	1.3938	0.0945946	0.538094	1	3900	tags=62%, list=33%, signal=92%
GOBP_DNA_REPLICATION_INITIATION	GOBP_DNA_REPLICATION_INITIATION		35	0.438028	1.39279	0.0707071	0.539439	1	3970	tags=57%, list=34%, signal=86%
GOBP_MULTICELLULAR_ORGANISM_AGING	GOBP_MULTICELLULAR_ORGANISM_AGING		23	0.47508	1.3915	0.0972222	0.541625	1	551	tags=13%, list=5%, signal=14%
GSE22886_NAIVE_BCELL_VS_NEUTROPHIL_UP	GSE22886_NAIVE_BCELL_VS_NEUTROPHIL_UP		146	0.340112	1.391	0	0.541192	1	1174	tags=23%, list=10%, signal=25%
GOBP_TRANSLESION_SYNTHESIS	GOBP_TRANSLESION_SYNTHESIS		34	0.444176	1.39064	0.0828877	0.540322	1	2233	tags=26%, list=19%, signal=33%
GSE44649_NAIVE_VS_ACTIVATED_CD8_TCELL_DN	GSE44649_NAIVE_VS_ACTIVATED_CD8_TCELL_DN		175	0.333058	1.38932	0.00515464	0.542679	1	3422	tags=42%, list=29%, signal=58%
GSE34156_NOD2_LIGAND_VS_TLR1_TLR2_LIGAND_24H_TREATED_MONOCYTE_UP	GSE34156_NOD2_LIGAND_VS_TLR1_TLR2_LIGAND_24H_TREATED_MONOCYTE_UP		110	0.356246	1.38654	0.0151515	0.549816	1	1067	tags=18%, list=9%, signal=20%
HP_RHABDOMYOSARCOMA	HP_RHABDOMYOSARCOMA		16	0.525382	1.3843	0.120988	0.555079	1	2870	tags=44%, list=24%, signal=58%
GOBP_CELL_DEATH_IN_RESPONSE_TO_HYDROGEN_PEROXIDE	GOBP_CELL_DEATH_IN_RESPONSE_TO_HYDROGEN_PEROXIDE		19	0.51877	1.38408	0.108434	0.553639	1	354	tags=11%, list=3%, signal=11%
HP_SHORT_THUMB	HP_SHORT_THUMB		68	0.379093	1.38363	0.0378549	0.552967	1	1139	tags=22%, list=10%, signal=24%
HP_ABSENT_THUMB	HP_ABSENT_THUMB		29	0.464399	1.38289	0.0953679	0.553455	1	2023	tags=45%, list=17%, signal=54%
GSE14000_TRANSLATED_RNA_VS_MRNA_DC_UP	GSE14000_TRANSLATED_RNA_VS_MRNA_DC_UP		177	0.328349	1.38281	0	0.551592	1	2805	tags=33%, list=24%, signal=42%
HP_BICORNUATE_UTERUS	HP_BICORNUATE_UTERUS		38	0.420226	1.38241	0.0750751	0.550849	1	2023	tags=29%, list=17%, signal=35%
HP_OVARIAN_CYST	HP_OVARIAN_CYST		53	0.403063	1.38192	0.0654206	0.550439	1	860	tags=15%, list=7%, signal=16%
HP_EMBRYONAL_RENAL_NEOPLASM	HP_EMBRYONAL_RENAL_NEOPLASM		33	0.443064	1.38151	0.072973	0.549722	1	2205	tags=30%, list=19%, signal=37%
HP_URETHRAL_ATRESIA	HP_URETHRAL_ATRESIA		17	0.516003	1.38129	0.0987342	0.548476	1	2555	tags=41%, list=22%, signal=52%
HP_MYOGLOBINURIA	HP_MYOGLOBINURIA		22	0.493633	1.37993	0.114428	0.551113	1	391	tags=14%, list=3%, signal=14%
GSE6674_CPG_VS_PL2_3_STIM_BCELL_UP	GSE6674_CPG_VS_PL2_3_STIM_BCELL_UP		164	0.337023	1.3775	0.00471698	0.557239	1	2417	tags=37%, list=20%, signal=45%
GOCC_CENTRIOLE	GOCC_CENTRIOLE		116	0.353584	1.37625	0.0325203	0.559434	1	2578	tags=34%, list=22%, signal=44%
GOBP_ATP_SYNTHESIS_COUPLED_ELECTRON_TRANSPORT	GOBP_ATP_SYNTHESIS_COUPLED_ELECTRON_TRANSPORT		74	0.379027	1.37605	0.0566667	0.55803	1	2243	tags=24%, list=19%, signal=30%
HALLMARK_MYC_TARGETS_V1	HALLMARK_MYC_TARGETS_V1		168	0.330347	1.37604	0.00970874	0.556008	1	2380	tags=21%, list=20%, signal=26%
HP_ABSENT_TESTIS	HP_ABSENT_TESTIS		23	0.482002	1.37592	0.0929648	0.554394	1	3942	tags=57%, list=33%, signal=85%
GOBP_MATURATION_OF_5_8S_RRNA	GOBP_MATURATION_OF_5_8S_RRNA		29	0.44332	1.37455	0.08	0.55694	1	2108	tags=31%, list=18%, signal=38%
HP_EMBRYONAL_NEOPLASM	HP_EMBRYONAL_NEOPLASM		41	0.418987	1.37029	0.0701754	0.569492	1	767	tags=15%, list=6%, signal=16%
HP_NEOPLASM_OF_THE_MALE_EXTERNAL_GENITALIA	HP_NEOPLASM_OF_THE_MALE_EXTERNAL_GENITALIA		22	0.483088	1.3693	0.104592	0.570897	1	50	tags=9%, list=0%, signal=9%
HP_BIFID_TONGUE	HP_BIFID_TONGUE		17	0.514509	1.36865	0.119048	0.571015	1	1052	tags=29%, list=9%, signal=32%
HP_PIGMENTARY_RETINOPATHY	HP_PIGMENTARY_RETINOPATHY		109	0.356062	1.36863	0.0211864	0.568987	1	3024	tags=30%, list=26%, signal=40%
HP_GERM_CELL_NEOPLASIA	HP_GERM_CELL_NEOPLASIA		25	0.473569	1.36793	0.0857909	0.569334	1	1284	tags=24%, list=11%, signal=27%
GOBP_CILIARY_BASAL_BODY_PLASMA_MEMBRANE_DOCKING	GOBP_CILIARY_BASAL_BODY_PLASMA_MEMBRANE_DOCKING		86	0.369111	1.36719	0.0418118	0.570075	1	3623	tags=48%, list=31%, signal=68%
GOMF_TELOMERIC_DNA_BINDING	GOMF_TELOMERIC_DNA_BINDING		33	0.437252	1.36692	0.0694445	0.568926	1	3943	tags=52%, list=33%, signal=77%
GOCC_NUCLEAR_REPLICATION_FORK	GOCC_NUCLEAR_REPLICATION_FORK		28	0.458926	1.36674	0.0978836	0.56744	1	3815	tags=54%, list=32%, signal=79%
HP_DUPLICATION_OF_THUMB_PHALANX	HP_DUPLICATION_OF_THUMB_PHALANX		36	0.437618	1.36586	0.0802292	0.56856	1	1430	tags=31%, list=12%, signal=35%
GOBP_MRNA_SPLICE_SITE_SELECTION	GOBP_MRNA_SPLICE_SITE_SELECTION		25	0.469317	1.36548	0.102902	0.567909	1	2541	tags=32%, list=22%, signal=41%
GSE3982_NEUTROPHIL_VS_BCELL_DN	GSE3982_NEUTROPHIL_VS_BCELL_DN		158	0.333547	1.36543	0.015	0.566115	1	2282	tags=22%, list=19%, signal=26%
GOBP_CRISTAE_FORMATION	GOBP_CRISTAE_FORMATION		29	0.447747	1.36508	0.0848329	0.565321	1	1909	tags=31%, list=16%, signal=37%
GOMF_TRNA_BINDING	GOMF_TRNA_BINDING		63	0.382725	1.36486	0.058309	0.564114	1	2449	tags=25%, list=21%, signal=32%
GOMF_CATALYTIC_ACTIVITY_ACTING_ON_DNA	GOMF_CATALYTIC_ACTIVITY_ACTING_ON_DNA		171	0.334411	1.36446	0.0231481	0.563518	1	3824	tags=43%, list=32%, signal=62%
GOBP_PYRIMIDINE_DEOXYRIBONUCLEOTIDE_METABOLIC_PROCESS	GOBP_PYRIMIDINE_DEOXYRIBONUCLEOTIDE_METABOLIC_PROCESS		16	0.517893	1.36432	0.11271	0.562061	1	1323	tags=25%, list=11%, signal=28%
GOCC_TRANSCRIPTION_FACTOR_TFIID_COMPLEX	GOCC_TRANSCRIPTION_FACTOR_TFIID_COMPLEX		28	0.449799	1.36409	0.108333	0.560944	1	3189	tags=46%, list=27%, signal=63%
GOMF_STRUCTURAL_MOLECULE_ACTIVITY	GOMF_STRUCTURAL_MOLECULE_ACTIVITY		388	0.299477	1.36287	0	0.563165	1	1225	tags=18%, list=10%, signal=19%
GOBP_CENTRIOLE_ASSEMBLY	GOBP_CENTRIOLE_ASSEMBLY		36	0.425471	1.36267	0.078125	0.561907	1	4082	tags=61%, list=35%, signal=93%
GOBP_REGULATION_OF_VOLTAGE_GATED_CALCIUM_CHANNEL_ACTIVITY	GOBP_REGULATION_OF_VOLTAGE_GATED_CALCIUM_CHANNEL_ACTIVITY		20	0.484158	1.36246	0.1025	0.5607	1	1677	tags=30%, list=14%, signal=35%
GSE37301_LYMPHOID_PRIMED_MPP_VS_GRAN_MONO_PROGENITOR_DN	GSE37301_LYMPHOID_PRIMED_MPP_VS_GRAN_MONO_PROGENITOR_DN		172	0.333293	1.36162	0.0180995	0.561823	1	2399	tags=23%, list=20%, signal=28%
GSE3982_EOSINOPHIL_VS_BASOPHIL_DN	GSE3982_EOSINOPHIL_VS_BASOPHIL_DN		163	0.331322	1.36131	0.0195122	0.560909	1	1658	tags=21%, list=14%, signal=25%
HALLMARK_DNA_REPAIR	HALLMARK_DNA_REPAIR		118	0.342915	1.3596	0.0362903	0.565068	1	3236	tags=37%, list=27%, signal=51%
GOBP_AXONEMAL_DYNEIN_COMPLEX_ASSEMBLY	GOBP_AXONEMAL_DYNEIN_COMPLEX_ASSEMBLY		17	0.510802	1.35936	0.13242	0.563984	1	1779	tags=53%, list=15%, signal=62%
HP_LACTIC_ACIDOSIS	HP_LACTIC_ACIDOSIS		140	0.337492	1.35875	0.0171674	0.56429	1	3243	tags=31%, list=27%, signal=43%
GOBP_MATURATION_OF_SSU_RRNA	GOBP_MATURATION_OF_SSU_RRNA		43	0.414874	1.35803	0.084058	0.564826	1	3548	tags=44%, list=30%, signal=63%
GOBP_POSITIVE_REGULATION_OF_EPIDERMAL_CELL_DIFFERENTIATION	GOBP_POSITIVE_REGULATION_OF_EPIDERMAL_CELL_DIFFERENTIATION		19	0.498871	1.35751	0.0994898	0.564711	1	1147	tags=26%, list=10%, signal=29%
GSE6259_33D1_POS_DC_VS_CD8_TCELL_UP	GSE6259_33D1_POS_DC_VS_CD8_TCELL_UP		66	0.37873	1.35749	0.0546075	0.562883	1	1572	tags=26%, list=13%, signal=30%
GSE45837_WT_VS_GFI1_KO_PDC_DN	GSE45837_WT_VS_GFI1_KO_PDC_DN		165	0.32512	1.35482	0.0100503	0.570427	1	2109	tags=25%, list=18%, signal=31%
HP_NEOPLASM_OF_THE_COLON	HP_NEOPLASM_OF_THE_COLON		62	0.384537	1.35412	0.0422961	0.571049	1	2185	tags=31%, list=18%, signal=37%
PATEL_SKIN_OF_BODY_ZOSTAVAX_AGE_70_93YO_VZV_CHALLENGE_3DY_DN	PATEL_SKIN_OF_BODY_ZOSTAVAX_AGE_70_93YO_VZV_CHALLENGE_3DY_DN		23	0.468929	1.35394	0.0909091	0.569796	1	3105	tags=48%, list=26%, signal=65%
HP_LIPID_ACCUMULATION_IN_HEPATOCYTES	HP_LIPID_ACCUMULATION_IN_HEPATOCYTES		96	0.362031	1.35357	0.0555556	0.56918	1	2019	tags=22%, list=17%, signal=26%
HP_ABNORMAL_CIRCULATING_ANDROGEN_LEVEL	HP_ABNORMAL_CIRCULATING_ANDROGEN_LEVEL		43	0.413091	1.35339	0.0926966	0.567968	1	963	tags=19%, list=8%, signal=20%
GOBP_ENDOCRINE_HORMONE_SECRETION	GOBP_ENDOCRINE_HORMONE_SECRETION		27	0.450652	1.3526	0.12234	0.568831	1	295	tags=11%, list=2%, signal=11%
GOMF_DNA_DEPENDENT_ATPASE_ACTIVITY	GOMF_DNA_DEPENDENT_ATPASE_ACTIVITY		46	0.407188	1.35077	0.070122	0.573472	1	4243	tags=46%, list=36%, signal=71%
HP_BREAST_CARCINOMA	HP_BREAST_CARCINOMA		52	0.404862	1.35068	0.0744337	0.571858	1	1284	tags=23%, list=11%, signal=26%
KEGG_HOMOLOGOUS_RECOMBINATION	KEGG_HOMOLOGOUS_RECOMBINATION		22	0.485125	1.35061	0.113402	0.570267	1	1959	tags=32%, list=17%, signal=38%
GOCC_M_BAND	GOCC_M_BAND		17	0.511231	1.3498	0.146341	0.571366	1	362	tags=12%, list=3%, signal=12%
GSE17974_CTRL_VS_ACT_IL4_AND_ANTI_IL12_24H_CD4_TCELL_DN	GSE17974_CTRL_VS_ACT_IL4_AND_ANTI_IL12_24H_CD4_TCELL_DN		160	0.327059	1.34976	0.00917431	0.569665	1	3010	tags=35%, list=25%, signal=46%
GOBP_NEGATIVE_REGULATION_OF_STEROID_METABOLIC_PROCESS	GOBP_NEGATIVE_REGULATION_OF_STEROID_METABOLIC_PROCESS		16	0.536752	1.34916	0.134146	0.569792	1	1226	tags=38%, list=10%, signal=42%
GOBP_RESPIRATORY_CHAIN_COMPLEX_IV_ASSEMBLY	GOBP_RESPIRATORY_CHAIN_COMPLEX_IV_ASSEMBLY		22	0.475775	1.34876	0.118421	0.569247	1	3617	tags=55%, list=31%, signal=78%
GOCC_BLOC_COMPLEX	GOCC_BLOC_COMPLEX		17	0.495097	1.34824	0.119617	0.569186	1	3180	tags=41%, list=27%, signal=56%
GOCC_U2_TYPE_SPLICEOSOMAL_COMPLEX	GOCC_U2_TYPE_SPLICEOSOMAL_COMPLEX		81	0.367817	1.34748	0.04811	0.570168	1	3378	tags=36%, list=29%, signal=50%
GOBP_NEGATIVE_REGULATION_OF_RESPONSE_TO_OXIDATIVE_STRESS	GOBP_NEGATIVE_REGULATION_OF_RESPONSE_TO_OXIDATIVE_STRESS		16	0.511822	1.34628	0.134474	0.572431	1	463	tags=13%, list=4%, signal=13%
HP_SCAPULAR_WINGING	HP_SCAPULAR_WINGING		55	0.38744	1.3447	0.0725076	0.576276	1	391	tags=9%, list=3%, signal=9%
GOMF_CYCLIN_DEPENDENT_PROTEIN_KINASE_ACTIVITY	GOMF_CYCLIN_DEPENDENT_PROTEIN_KINASE_ACTIVITY		23	0.466737	1.34419	0.119718	0.576182	1	1204	tags=30%, list=10%, signal=34%
GOCC_PRERIBOSOME_LARGE_SUBUNIT_PRECURSOR	GOCC_PRERIBOSOME_LARGE_SUBUNIT_PRECURSOR		17	0.507086	1.34355	0.126168	0.576489	1	2221	tags=35%, list=19%, signal=43%
HP_ABNORMALITY_OF_THE_MUSCULATURE_OF_THE_HAND	HP_ABNORMALITY_OF_THE_MUSCULATURE_OF_THE_HAND		59	0.388706	1.34309	0.0825688	0.57629	1	1375	tags=27%, list=12%, signal=31%
KEGG_DNA_REPLICATION	KEGG_DNA_REPLICATION		29	0.458205	1.34171	0.0941476	0.579221	1	3815	tags=38%, list=32%, signal=56%
GOBP_PYRIMIDINE_NUCLEOTIDE_METABOLIC_PROCESS	GOBP_PYRIMIDINE_NUCLEOTIDE_METABOLIC_PROCESS		33	0.432114	1.34123	0.0891892	0.579056	1	3236	tags=45%, list=27%, signal=62%
GOMF_METALLOCARBOXYPEPTIDASE_ACTIVITY	GOMF_METALLOCARBOXYPEPTIDASE_ACTIVITY		16	0.514865	1.34009	0.121654	0.581342	1	930	tags=31%, list=8%, signal=34%
KEGG_PYRIMIDINE_METABOLISM	KEGG_PYRIMIDINE_METABOLISM		73	0.364205	1.33988	0.0625	0.580287	1	3323	tags=41%, list=28%, signal=57%
HP_3_METHYLGLUTACONIC_ACIDURIA	HP_3_METHYLGLUTACONIC_ACIDURIA		15	0.512988	1.33962	0.13494	0.579385	1	3718	tags=40%, list=31%, signal=58%
GSE6269_HEALTHY_VS_FLU_INF_PBMC_UP	GSE6269_HEALTHY_VS_FLU_INF_PBMC_UP		134	0.33504	1.3394	0.040724	0.578352	1	1835	tags=21%, list=16%, signal=24%
HP_MUSCLE_ABNORMALITY_RELATED_TO_MITOCHONDRIAL_DYSFUNCTION	HP_MUSCLE_ABNORMALITY_RELATED_TO_MITOCHONDRIAL_DYSFUNCTION		60	0.38376	1.33819	0.0718563	0.580898	1	4083	tags=48%, list=35%, signal=73%
GOCC_ORGANELLE_INNER_MEMBRANE	GOCC_ORGANELLE_INNER_MEMBRANE		409	0.29914	1.33796	0	0.579965	1	2718	tags=31%, list=23%, signal=39%
GOBP_ESTABLISHMENT_OF_PROTEIN_LOCALIZATION_TO_CHROMOSOME	GOBP_ESTABLISHMENT_OF_PROTEIN_LOCALIZATION_TO_CHROMOSOME		24	0.472609	1.33708	0.122563	0.581287	1	4321	tags=50%, list=37%, signal=79%
GSE37533_UNTREATED_VS_PIOGLIZATONE_TREATED_CD4_TCELL_PPARG2_AND_FOXP3_TRASDUCED_UP	GSE37533_UNTREATED_VS_PIOGLIZATONE_TREATED_CD4_TCELL_PPARG2_AND_FOXP3_TRASDUCED_UP		104	0.342301	1.3365	0.0447154	0.581487	1	1596	tags=16%, list=14%, signal=19%
HP_CHROMOSOME_BREAKAGE	HP_CHROMOSOME_BREAKAGE		25	0.465964	1.3357	0.113801	0.582475	1	3419	tags=52%, list=29%, signal=73%
GOBP_PYRIMIDINE_NUCLEOTIDE_CATABOLIC_PROCESS	GOBP_PYRIMIDINE_NUCLEOTIDE_CATABOLIC_PROCESS		15	0.519515	1.33548	0.13615	0.581515	1	1323	tags=27%, list=11%, signal=30%
GOCC_SPLICEOSOMAL_COMPLEX	GOCC_SPLICEOSOMAL_COMPLEX		161	0.329501	1.33374	0.0176991	0.585729	1	3425	tags=36%, list=29%, signal=50%
HP_INCREASED_CSF_LACTATE	HP_INCREASED_CSF_LACTATE		78	0.358702	1.33126	0.0811808	0.592966	1	4083	tags=47%, list=35%, signal=72%
GOMF_POSTSYNAPTIC_NEUROTRANSMITTER_RECEPTOR_ACTIVITY	GOMF_POSTSYNAPTIC_NEUROTRANSMITTER_RECEPTOR_ACTIVITY		15	0.510773	1.3296	0.136891	0.597127	1	1307	tags=33%, list=11%, signal=37%
GOBP_RRNA_METHYLATION	GOBP_RRNA_METHYLATION		22	0.473767	1.32922	0.126551	0.596717	1	3374	tags=45%, list=29%, signal=64%
GOBP_MITOCHONDRIAL_TRANSMEMBRANE_TRANSPORT	GOBP_MITOCHONDRIAL_TRANSMEMBRANE_TRANSPORT		85	0.356066	1.3283	0.037037	0.59817	1	1758	tags=26%, list=15%, signal=30%
GOCC_COLLAGEN_TRIMER	GOCC_COLLAGEN_TRIMER		54	0.385676	1.32784	0.0971787	0.598043	1	747	tags=15%, list=6%, signal=16%
GOCC_RNA_POLYMERASE_II_HOLOENZYME	GOCC_RNA_POLYMERASE_II_HOLOENZYME		61	0.3761	1.32541	0.0822785	0.604928	1	3189	tags=36%, list=27%, signal=49%
GOBP_RNA_SPLICING_VIA_TRANSESTERIFICATION_REACTIONS	GOBP_RNA_SPLICING_VIA_TRANSESTERIFICATION_REACTIONS		291	0.301219	1.32477	0	0.605398	1	3800	tags=34%, list=32%, signal=49%
GSE5455_EX_VIVO_VS_POST_24H_INCUBATION_MONOCYTES_FROM_TUMOR_BEARING_MOUSE_UP	GSE5455_EX_VIVO_VS_POST_24H_INCUBATION_MONOCYTES_FROM_TUMOR_BEARING_MOUSE_UP		158	0.322965	1.32461	0.0351759	0.604157	1	2680	tags=34%, list=23%, signal=44%
GSE14908_RESTING_VS_HDM_STIM_CD4_TCELL_ATOPIC_PATIENT_UP	GSE14908_RESTING_VS_HDM_STIM_CD4_TCELL_ATOPIC_PATIENT_UP		167	0.317994	1.3238	0.0157895	0.605372	1	3089	tags=35%, list=26%, signal=47%
HP_MISSING_RIBS	HP_MISSING_RIBS		29	0.443018	1.32368	0.138504	0.604007	1	1439	tags=28%, list=12%, signal=31%
GOMF_OXIDOREDUCTASE_ACTIVITY_ACTING_ON_PAIRED_DONORS_WITH_INCORPORATION_OR_REDUCTION_OF_MOLECULAR_OXYGEN_NAD_P_H_AS_ONE_DONOR_AND_INCORPORATION_OF_ONE_ATOM_OF_OXYGEN	GOMF_OXIDOREDUCTASE_ACTIVITY_ACTING_ON_PAIRED_DONORS_WITH_INCORPORATION_OR_REDUCTION_OF_MOLECULAR_OXYGEN_NAD_P_H_AS_ONE_DONOR_AND_INCORPORATION_OF_ONE_ATOM_OF_OXYGEN		28	0.443001	1.32351	0.0981912	0.602903	1	576	tags=21%, list=5%, signal=22%
HP_DECREASED_CIRCULATING_ANDROGEN_LEVEL	HP_DECREASED_CIRCULATING_ANDROGEN_LEVEL		36	0.410428	1.32345	0.108401	0.601332	1	963	tags=19%, list=8%, signal=21%
GOCC_A_BAND	GOCC_A_BAND		24	0.452572	1.32242	0.140777	0.603203	1	1827	tags=25%, list=15%, signal=30%
HP_ABNORMAL_SPERMATOGENESIS	HP_ABNORMAL_SPERMATOGENESIS		70	0.365584	1.32125	0.0629139	0.605646	1	949	tags=17%, list=8%, signal=19%
HARALAMBIEVA_PBMC_FLUARIX_AGE_50_74YO_CORR_WITH_28D_MEM_B_CELL_RESPONSE_AT_0DY_POSITIVE	HARALAMBIEVA_PBMC_FLUARIX_AGE_50_74YO_CORR_WITH_28D_MEM_B_CELL_RESPONSE_AT_0DY_POSITIVE		350	0.297777	1.32112	0	0.60439	1	2617	tags=30%, list=22%, signal=37%
GOBP_NEGATIVE_REGULATION_OF_ACTIN_FILAMENT_POLYMERIZATION	GOBP_NEGATIVE_REGULATION_OF_ACTIN_FILAMENT_POLYMERIZATION		44	0.39766	1.32107	0.0982143	0.602848	1	1529	tags=25%, list=13%, signal=29%
GOBP_NEGATIVE_REGULATION_OF_OXIDATIVE_STRESS_INDUCED_CELL_DEATH	GOBP_NEGATIVE_REGULATION_OF_OXIDATIVE_STRESS_INDUCED_CELL_DEATH		33	0.425318	1.32026	0.117166	0.603871	1	303	tags=9%, list=3%, signal=9%
GSE45365_CD8A_DC_VS_CD11B_DC_IFNAR_KO_DN	GSE45365_CD8A_DC_VS_CD11B_DC_IFNAR_KO_DN		145	0.330515	1.31892	0.021097	0.607034	1	1592	tags=23%, list=13%, signal=27%
GOMF_NUCLEOTIDE_DIPHOSPHATASE_ACTIVITY	GOMF_NUCLEOTIDE_DIPHOSPHATASE_ACTIVITY		16	0.506689	1.31891	0.159314	0.605316	1	2025	tags=38%, list=17%, signal=45%
GOCC_METHYLTRANSFERASE_COMPLEX	GOCC_METHYLTRANSFERASE_COMPLEX		80	0.355835	1.31891	0.0666667	0.603621	1	3015	tags=33%, list=26%, signal=43%
GSE17721_LPS_VS_PAM3CSK4_1H_BMDC_UP	GSE17721_LPS_VS_PAM3CSK4_1H_BMDC_UP		153	0.321688	1.31792	0.0320856	0.605509	1	3492	tags=38%, list=30%, signal=53%
GSE34156_UNTREATED_VS_24H_TLR1_TLR2_LIGAND_TREATED_MONOCYTE_DN	GSE34156_UNTREATED_VS_24H_TLR1_TLR2_LIGAND_TREATED_MONOCYTE_DN		133	0.338646	1.31771	0.029661	0.604581	1	3832	tags=47%, list=32%, signal=69%
GOCC_GAMMA_TUBULIN_COMPLEX	GOCC_GAMMA_TUBULIN_COMPLEX		19	0.482967	1.3164	0.133017	0.607714	1	2240	tags=37%, list=19%, signal=45%
GSE11924_TFH_VS_TH2_CD4_TCELL_DN	GSE11924_TFH_VS_TH2_CD4_TCELL_DN		147	0.322805	1.31587	0.0175439	0.607985	1	1806	tags=20%, list=15%, signal=24%
GOBP_MRNA_CIS_SPLICING_VIA_SPLICEOSOME	GOBP_MRNA_CIS_SPLICING_VIA_SPLICEOSOME		17	0.484364	1.31544	0.153302	0.607865	1	2042	tags=29%, list=17%, signal=36%
HP_RENAL_HYPOPLASIA	HP_RENAL_HYPOPLASIA		82	0.350173	1.31537	0.0654545	0.606448	1	2558	tags=27%, list=22%, signal=34%
HP_GASTROPARESIS	HP_GASTROPARESIS		21	0.468457	1.31402	0.130332	0.609641	1	303	tags=14%, list=3%, signal=15%
GOBP_CILIUM_MOVEMENT	GOBP_CILIUM_MOVEMENT		65	0.37332	1.31354	0.0612245	0.609669	1	990	tags=25%, list=8%, signal=27%
HP_ANOPHTHALMIA	HP_ANOPHTHALMIA		53	0.381221	1.31311	0.0767045	0.60953	1	277	tags=9%, list=2%, signal=10%
HP_PROXIMAL_MUSCLE_WEAKNESS_IN_UPPER_LIMBS	HP_PROXIMAL_MUSCLE_WEAKNESS_IN_UPPER_LIMBS		27	0.441369	1.3127	0.135417	0.609346	1	1377	tags=26%, list=12%, signal=29%
KEGG_OXIDATIVE_PHOSPHORYLATION	KEGG_OXIDATIVE_PHOSPHORYLATION		92	0.347532	1.31208	0.0520446	0.609904	1	2243	tags=26%, list=19%, signal=32%
GOMF_ISOPRENOID_BINDING	GOMF_ISOPRENOID_BINDING		17	0.503286	1.31169	0.125641	0.609524	1	796	tags=35%, list=7%, signal=38%
GOBP_SKELETAL_MUSCLE_CONTRACTION	GOBP_SKELETAL_MUSCLE_CONTRACTION		22	0.471368	1.31035	0.130864	0.612633	1	2954	tags=36%, list=25%, signal=48%
GOBP_RRNA_CATABOLIC_PROCESS	GOBP_RRNA_CATABOLIC_PROCESS		15	0.499277	1.31035	0.148402	0.610983	1	3266	tags=47%, list=28%, signal=64%
GSE27291_0H_VS_6H_STIM_GAMMADELTA_TCELL_DN	GSE27291_0H_VS_6H_STIM_GAMMADELTA_TCELL_DN		115	0.329155	1.30978	0.0210084	0.611419	1	1748	tags=20%, list=15%, signal=23%
HP_MALE_REPRODUCTIVE_SYSTEM_NEOPLASM	HP_MALE_REPRODUCTIVE_SYSTEM_NEOPLASM		44	0.391719	1.30847	0.123684	0.614622	1	1003	tags=18%, list=8%, signal=20%
GOBP_POSITIVE_REGULATION_OF_PEPTIDE_SECRETION	GOBP_POSITIVE_REGULATION_OF_PEPTIDE_SECRETION		91	0.351241	1.30807	0.0683453	0.614396	1	755	tags=13%, list=6%, signal=14%
HP_OVARIAN_NEOPLASM	HP_OVARIAN_NEOPLASM		51	0.394026	1.30791	0.115152	0.613305	1	996	tags=18%, list=8%, signal=19%
GOMF_RNA_POLYMERASE_II_GENERAL_TRANSCRIPTION_INITIATION_FACTOR_ACTIVITY	GOMF_RNA_POLYMERASE_II_GENERAL_TRANSCRIPTION_INITIATION_FACTOR_ACTIVITY		31	0.434118	1.30746	0.113402	0.61332	1	3758	tags=52%, list=32%, signal=75%
GOMF_N_ACETYLTRANSFERASE_ACTIVITY	GOMF_N_ACETYLTRANSFERASE_ACTIVITY		51	0.381645	1.30692	0.0980392	0.613557	1	1499	tags=18%, list=13%, signal=20%
HP_ABNORMAL_MITOCHONDRIA_IN_MUSCLE_TISSUE	HP_ABNORMAL_MITOCHONDRIA_IN_MUSCLE_TISSUE		35	0.423174	1.30632	0.109859	0.614005	1	2412	tags=31%, list=20%, signal=39%
GSE10325_BCELL_VS_LUPUS_BCELL_UP	GSE10325_BCELL_VS_LUPUS_BCELL_UP		117	0.326482	1.30406	0.057377	0.620877	1	1555	tags=21%, list=13%, signal=24%
GSE26351_WNT_VS_BMP_PATHWAY_STIM_HEMATOPOIETIC_PROGENITORS_UP	GSE26351_WNT_VS_BMP_PATHWAY_STIM_HEMATOPOIETIC_PROGENITORS_UP		136	0.323134	1.29999	0.0211864	0.634372	1	1148	tags=18%, list=10%, signal=19%
HP_CHOANAL_STENOSIS	HP_CHOANAL_STENOSIS		17	0.489928	1.29886	0.16152	0.636906	1	1685	tags=41%, list=14%, signal=48%
GOCC_SMALL_SUBUNIT_PROCESSOME	GOCC_SMALL_SUBUNIT_PROCESSOME		34	0.415576	1.29885	0.123656	0.635278	1	2507	tags=32%, list=21%, signal=41%
GSE12963_UNINF_VS_ENV_AND_NEF_DEFICIENT_HIV1_INF_CD4_TCELL_DN	GSE12963_UNINF_VS_ENV_AND_NEF_DEFICIENT_HIV1_INF_CD4_TCELL_DN		109	0.330071	1.29876	0.0801527	0.633871	1	991	tags=15%, list=8%, signal=16%
GOBP_ACROSOME_REACTION	GOBP_ACROSOME_REACTION		15	0.515072	1.29849	0.167832	0.633264	1	2018	tags=40%, list=17%, signal=48%
HP_ABNORMAL_OVARIAN_MORPHOLOGY	HP_ABNORMAL_OVARIAN_MORPHOLOGY		100	0.336748	1.29632	0.0653846	0.639762	1	1212	tags=15%, list=10%, signal=17%
GSE22589_HEALTHY_VS_HIV_AND_SIV_INFECTED_DC_UP	GSE22589_HEALTHY_VS_HIV_AND_SIV_INFECTED_DC_UP		170	0.311037	1.29554	0.0142857	0.641022	1	2486	tags=26%, list=21%, signal=33%
GOBP_NEGATIVE_REGULATION_OF_RNA_SPLICING	GOBP_NEGATIVE_REGULATION_OF_RNA_SPLICING		19	0.485669	1.2954	0.131188	0.639845	1	206	tags=11%, list=2%, signal=11%
GSE18804_SPLEEN_MACROPHAGE_VS_BRAIN_TUMORAL_MACROPHAGE_DN	GSE18804_SPLEEN_MACROPHAGE_VS_BRAIN_TUMORAL_MACROPHAGE_DN		154	0.317476	1.29535	0.0371901	0.638401	1	1960	tags=25%, list=17%, signal=29%
HP_FLARED_METAPHYSIS	HP_FLARED_METAPHYSIS		35	0.41297	1.29423	0.125333	0.640964	1	347	tags=11%, list=3%, signal=12%
HP_ABNORMALITY_OF_THE_MUSCULATURE_OF_THE_UPPER_LIMBS	HP_ABNORMALITY_OF_THE_MUSCULATURE_OF_THE_UPPER_LIMBS		146	0.317738	1.29387	0.0588235	0.640738	1	2161	tags=25%, list=18%, signal=31%
GOMF_WNT_PROTEIN_BINDING	GOMF_WNT_PROTEIN_BINDING		27	0.445033	1.29334	0.117166	0.641065	1	1073	tags=30%, list=9%, signal=33%
HP_SCROTAL_HYPOPLASIA	HP_SCROTAL_HYPOPLASIA		36	0.41712	1.29327	0.123209	0.639674	1	1290	tags=22%, list=11%, signal=25%
HP_ACUTE_LEUKEMIA	HP_ACUTE_LEUKEMIA		79	0.353483	1.29264	0.0743802	0.640345	1	1491	tags=24%, list=13%, signal=27%
GOCC_OXIDOREDUCTASE_COMPLEX	GOCC_OXIDOREDUCTASE_COMPLEX		84	0.350065	1.29179	0.0706714	0.641866	1	2243	tags=26%, list=19%, signal=32%
GOBP_AXONEME_ASSEMBLY	GOBP_AXONEME_ASSEMBLY		39	0.403897	1.29096	0.138122	0.643359	1	990	tags=36%, list=8%, signal=39%
GSE15659_CD45RA_NEG_CD4_TCELL_VS_RESTING_TREG_DN	GSE15659_CD45RA_NEG_CD4_TCELL_VS_RESTING_TREG_DN		129	0.319353	1.29075	0.0528455	0.642485	1	2420	tags=28%, list=20%, signal=35%
GSE1460_DP_VS_CD4_THYMOCYTE_UP	GSE1460_DP_VS_CD4_THYMOCYTE_UP		153	0.315972	1.29048	0.0473934	0.641837	1	1222	tags=19%, list=10%, signal=21%
HP_ACUTE_MYELOID_LEUKEMIA	HP_ACUTE_MYELOID_LEUKEMIA		47	0.39206	1.29046	0.11746	0.640276	1	1153	tags=28%, list=10%, signal=31%
HP_DECREASED_FERTILITY_IN_MALES	HP_DECREASED_FERTILITY_IN_MALES		71	0.353672	1.28911	0.0961538	0.643691	1	990	tags=21%, list=8%, signal=23%
GSE20198_IL12_IL18_VS_IFNA_TREATED_ACT_CD4_TCELL_UP	GSE20198_IL12_IL18_VS_IFNA_TREATED_ACT_CD4_TCELL_UP		171	0.30763	1.28891	0.03125	0.642862	1	1588	tags=20%, list=13%, signal=23%
GSE31082_DN_VS_CD4_SP_THYMOCYTE_UP	GSE31082_DN_VS_CD4_SP_THYMOCYTE_UP		172	0.309897	1.28853	0.0320856	0.64268	1	3512	tags=39%, list=30%, signal=55%
GOMF_GENERAL_TRANSCRIPTION_INITIATION_FACTOR_BINDING	GOMF_GENERAL_TRANSCRIPTION_INITIATION_FACTOR_BINDING		41	0.398642	1.28797	0.114114	0.643133	1	3587	tags=44%, list=30%, signal=63%
GSE31082_DN_VS_DP_THYMOCYTE_UP	GSE31082_DN_VS_DP_THYMOCYTE_UP		169	0.319377	1.28765	0.0260417	0.64273	1	3188	tags=37%, list=27%, signal=50%
KEGG_SELENOAMINO_ACID_METABOLISM	KEGG_SELENOAMINO_ACID_METABOLISM		18	0.472356	1.28761	0.164649	0.641275	1	2566	tags=39%, list=22%, signal=50%
GOCC_U2_TYPE_CATALYTIC_STEP_2_SPLICEOSOME	GOCC_U2_TYPE_CATALYTIC_STEP_2_SPLICEOSOME		26	0.441075	1.28641	0.14532	0.64415	1	3378	tags=42%, list=29%, signal=59%
GOBP_NEGATIVE_REGULATION_OF_DOUBLE_STRAND_BREAK_REPAIR_VIA_HOMOLOGOUS_RECOMBINATION	GOBP_NEGATIVE_REGULATION_OF_DOUBLE_STRAND_BREAK_REPAIR_VIA_HOMOLOGOUS_RECOMBINATION		17	0.488625	1.28635	0.157761	0.642784	1	3548	tags=47%, list=30%, signal=67%
GSE11924_TFH_VS_TH17_CD4_TCELL_DN	GSE11924_TFH_VS_TH17_CD4_TCELL_DN		156	0.313096	1.28504	0.028436	0.646056	1	2141	tags=26%, list=18%, signal=31%
GSE27786_CD8_TCELL_VS_NKCELL_UP	GSE27786_CD8_TCELL_VS_NKCELL_UP		163	0.312193	1.28434	0.0205128	0.646989	1	1862	tags=24%, list=16%, signal=28%
GSE3982_CTRL_VS_LPS_4H_MAC_UP	GSE3982_CTRL_VS_LPS_4H_MAC_UP		166	0.310609	1.28431	0.0430622	0.645539	1	2678	tags=27%, list=23%, signal=35%
GOCC_OUTER_MITOCHONDRIAL_MEMBRANE_PROTEIN_COMPLEX	GOCC_OUTER_MITOCHONDRIAL_MEMBRANE_PROTEIN_COMPLEX		17	0.487999	1.28377	0.17506	0.64602	1	2573	tags=47%, list=22%, signal=60%
HP_ABNORMAL_FALLOPIAN_TUBE_MORPHOLOGY	HP_ABNORMAL_FALLOPIAN_TUBE_MORPHOLOGY		16	0.498805	1.28322	0.164706	0.646544	1	2164	tags=38%, list=18%, signal=46%
GOMF_RNA_POLYMERASE_II_GENERAL_TRANSCRIPTION_INITIATION_FACTOR_BINDING	GOMF_RNA_POLYMERASE_II_GENERAL_TRANSCRIPTION_INITIATION_FACTOR_BINDING		17	0.484617	1.28317	0.185446	0.645161	1	3587	tags=53%, list=30%, signal=76%
HP_RENAL_TUBULAR_ACIDOSIS	HP_RENAL_TUBULAR_ACIDOSIS		32	0.420172	1.28276	0.125326	0.645111	1	237	tags=9%, list=2%, signal=10%
HP_PAROXYSMAL_INVOLUNTARY_EYE_MOVEMENTS	HP_PAROXYSMAL_INVOLUNTARY_EYE_MOVEMENTS		32	0.415436	1.28236	0.11898	0.64503	1	4083	tags=59%, list=35%, signal=90%
GOBP_EXECUTION_PHASE_OF_APOPTOSIS	GOBP_EXECUTION_PHASE_OF_APOPTOSIS		54	0.378039	1.28204	0.0868263	0.644704	1	808	tags=13%, list=7%, signal=14%
GOMF_TRANSFERASE_ACTIVITY_TRANSFERRING_ALKYL_OR_ARYL_OTHER_THAN_METHYL_GROUPS	GOMF_TRANSFERASE_ACTIVITY_TRANSFERRING_ALKYL_OR_ARYL_OTHER_THAN_METHYL_GROUPS		38	0.406538	1.28124	0.132132	0.646195	1	2322	tags=34%, list=20%, signal=42%
GOBP_DRUG_METABOLIC_PROCESS	GOBP_DRUG_METABOLIC_PROCESS		15	0.503528	1.2812	0.176611	0.644809	1	1597	tags=33%, list=14%, signal=38%
GOBP_NUCLEOTIDE_EXCISION_REPAIR	GOBP_NUCLEOTIDE_EXCISION_REPAIR		87	0.339644	1.2805	0.0711864	0.645932	1	4167	tags=46%, list=35%, signal=71%
HP_ACIDEMIA	HP_ACIDEMIA		18	0.471744	1.28015	0.188917	0.645705	1	2677	tags=50%, list=23%, signal=65%
GOBP_TELOMERE_MAINTENANCE_VIA_SEMI_CONSERVATIVE_REPLICATION	GOBP_TELOMERE_MAINTENANCE_VIA_SEMI_CONSERVATIVE_REPLICATION		23	0.443126	1.28008	0.167939	0.644412	1	3879	tags=48%, list=33%, signal=71%
KEGG_CYSTEINE_AND_METHIONINE_METABOLISM	KEGG_CYSTEINE_AND_METHIONINE_METABOLISM		23	0.445548	1.27962	0.144357	0.644608	1	3570	tags=57%, list=30%, signal=81%
HP_RHABDOMYOLYSIS	HP_RHABDOMYOLYSIS		27	0.429468	1.27808	0.161111	0.648833	1	3229	tags=48%, list=27%, signal=66%
HP_POOR_APPETITE	HP_POOR_APPETITE		27	0.429595	1.27754	0.150794	0.64935	1	3817	tags=59%, list=32%, signal=87%
HP_MALE_INFERTILITY	HP_MALE_INFERTILITY		46	0.376453	1.27669	0.130919	0.651046	1	990	tags=26%, list=8%, signal=28%
GOCC_9PLUS0_NON_MOTILE_CILIUM	GOCC_9PLUS0_NON_MOTILE_CILIUM		61	0.368919	1.27607	0.0952381	0.651853	1	3024	tags=44%, list=26%, signal=59%
GOMF_UBIQUITIN_LIKE_PROTEIN_SPECIFIC_PROTEASE_ACTIVITY	GOMF_UBIQUITIN_LIKE_PROTEIN_SPECIFIC_PROTEASE_ACTIVITY		16	0.493599	1.27576	0.188544	0.651664	1	3732	tags=50%, list=32%, signal=73%
GSE27786_LSK_VS_MONO_MAC_UP	GSE27786_LSK_VS_MONO_MAC_UP		167	0.305247	1.27279	0.0218579	0.661617	1	2490	tags=28%, list=21%, signal=35%
GOBP_TRANSCRIPTION_PREINITIATION_COMPLEX_ASSEMBLY	GOBP_TRANSCRIPTION_PREINITIATION_COMPLEX_ASSEMBLY		32	0.418502	1.27275	0.160858	0.660185	1	3820	tags=44%, list=32%, signal=64%
HP_ABNORMALITY_OF_URINE_CALCIUM_CONCENTRATION	HP_ABNORMALITY_OF_URINE_CALCIUM_CONCENTRATION		35	0.408092	1.27268	0.136483	0.658918	1	908	tags=20%, list=8%, signal=22%
GSE22611_UNSTIM_VS_2H_MDP_STIM_NOD2_TRANSDUCED_HEK293T_CELL_DN	GSE22611_UNSTIM_VS_2H_MDP_STIM_NOD2_TRANSDUCED_HEK293T_CELL_DN		134	0.316469	1.27199	0.0555556	0.660045	1	1691	tags=18%, list=14%, signal=21%
GOBP_POSITIVE_REGULATION_OF_INSULIN_SECRETION	GOBP_POSITIVE_REGULATION_OF_INSULIN_SECRETION		41	0.387054	1.27167	0.142857	0.659719	1	560	tags=15%, list=5%, signal=15%
GOBP_BONE_GROWTH	GOBP_BONE_GROWTH		18	0.462509	1.27098	0.169192	0.660855	1	1284	tags=28%, list=11%, signal=31%
GOBP_SENSORY_PERCEPTION_OF_MECHANICAL_STIMULUS	GOBP_SENSORY_PERCEPTION_OF_MECHANICAL_STIMULUS		94	0.338676	1.27047	0.0813954	0.661303	1	694	tags=14%, list=6%, signal=15%
GOBP_CELLULAR_PROTEIN_COMPLEX_DISASSEMBLY	GOBP_CELLULAR_PROTEIN_COMPLEX_DISASSEMBLY		180	0.302254	1.27012	0.0537634	0.661029	1	2605	tags=32%, list=22%, signal=40%
GSE3691_IFN_PRODUCING_KILLER_DC_VS_CONVENTIONAL_DC_SPLEEN_DN	GSE3691_IFN_PRODUCING_KILLER_DC_VS_CONVENTIONAL_DC_SPLEEN_DN		134	0.322679	1.2682	0.0678733	0.667078	1	2149	tags=25%, list=18%, signal=31%
GOBP_MONOSACCHARIDE_METABOLIC_PROCESS	GOBP_MONOSACCHARIDE_METABOLIC_PROCESS		201	0.297402	1.26803	0.0430108	0.666207	1	1696	tags=16%, list=14%, signal=19%
GSE27786_LIN_NEG_VS_NEUTROPHIL_UP	GSE27786_LIN_NEG_VS_NEUTROPHIL_UP		161	0.307871	1.26707	0.04	0.66837	1	3373	tags=39%, list=29%, signal=53%
HP_HYPOPLASIA_OF_THE_FRONTAL_LOBES	HP_HYPOPLASIA_OF_THE_FRONTAL_LOBES		30	0.407035	1.26639	0.144703	0.669497	1	3040	tags=40%, list=26%, signal=54%
HP_ABNORMAL_CIRCULATING_ESTROGEN_LEVEL	HP_ABNORMAL_CIRCULATING_ESTROGEN_LEVEL		32	0.412493	1.26618	0.163158	0.668804	1	2185	tags=28%, list=18%, signal=34%
GSE16385_MONOCYTE_VS_MACROPHAGE_DN	GSE16385_MONOCYTE_VS_MACROPHAGE_DN		131	0.316581	1.26609	0.0669456	0.667651	1	1455	tags=23%, list=12%, signal=26%
HP_MEDIAL_FLARING_OF_THE_EYEBROW	HP_MEDIAL_FLARING_OF_THE_EYEBROW		21	0.462156	1.26564	0.154964	0.66784	1	3024	tags=48%, list=26%, signal=64%
HP_DEHYDRATION	HP_DEHYDRATION		56	0.373652	1.26523	0.136778	0.667918	1	1047	tags=20%, list=9%, signal=21%
GSE3565_DUSP1_VS_WT_SPLENOCYTES_POST_LPS_INJECTION_UP	GSE3565_DUSP1_VS_WT_SPLENOCYTES_POST_LPS_INJECTION_UP		131	0.315667	1.26474	0.0588235	0.668286	1	2731	tags=33%, list=23%, signal=42%
GSE41867_DAY6_VS_DAY8_LCMV_ARMSTRONG_EFFECTOR_CD8_TCELL_DN	GSE41867_DAY6_VS_DAY8_LCMV_ARMSTRONG_EFFECTOR_CD8_TCELL_DN		174	0.304805	1.26366	0.0465116	0.671174	1	2852	tags=33%, list=24%, signal=43%
HP_RENAL_TUBULAR_DYSFUNCTION	HP_RENAL_TUBULAR_DYSFUNCTION		78	0.348048	1.2635	0.10453	0.670259	1	2437	tags=31%, list=21%, signal=39%
HP_EPIPHYSEAL_DYSPLASIA	HP_EPIPHYSEAL_DYSPLASIA		18	0.465815	1.26283	0.173575	0.6714	1	347	tags=11%, list=3%, signal=11%
GSE39820_TGFBETA3_IL6_VS_TGFBETA3_IL6_IL23A_TREATED_CD4_TCELL_DN	GSE39820_TGFBETA3_IL6_VS_TGFBETA3_IL6_IL23A_TREATED_CD4_TCELL_DN		138	0.308585	1.26148	0.0533333	0.675166	1	2417	tags=29%, list=20%, signal=36%
GOBP_IRON_SULFUR_CLUSTER_ASSEMBLY	GOBP_IRON_SULFUR_CLUSTER_ASSEMBLY		17	0.468531	1.26141	0.156863	0.673888	1	3810	tags=65%, list=32%, signal=95%
GOBP_PYRIMIDINE_CONTAINING_COMPOUND_CATABOLIC_PROCESS	GOBP_PYRIMIDINE_CONTAINING_COMPOUND_CATABOLIC_PROCESS		26	0.435586	1.26038	0.169666	0.676412	1	1323	tags=23%, list=11%, signal=26%
GOCC_INTRINSIC_COMPONENT_OF_MITOCHONDRIAL_MEMBRANE	GOCC_INTRINSIC_COMPONENT_OF_MITOCHONDRIAL_MEMBRANE		68	0.354056	1.26028	0.107937	0.675278	1	3145	tags=41%, list=27%, signal=56%
HP_RICKETS	HP_RICKETS		26	0.440418	1.25955	0.160401	0.676676	1	908	tags=23%, list=8%, signal=25%
GOBP_NCRNA_CATABOLIC_PROCESS	GOBP_NCRNA_CATABOLIC_PROCESS		31	0.409052	1.25942	0.150134	0.675687	1	3266	tags=42%, list=28%, signal=58%
GOBP_HISTONE_PHOSPHORYLATION	GOBP_HISTONE_PHOSPHORYLATION		32	0.411372	1.2589	0.169231	0.676287	1	847	tags=13%, list=7%, signal=13%
HP_OLIGOMENORRHEA	HP_OLIGOMENORRHEA		26	0.435001	1.25879	0.154412	0.675258	1	1924	tags=19%, list=16%, signal=23%
GOMF_CATALYTIC_ACTIVITY_ACTING_ON_A_RRNA	GOMF_CATALYTIC_ACTIVITY_ACTING_ON_A_RRNA		21	0.455849	1.25825	0.156863	0.675885	1	3374	tags=43%, list=29%, signal=60%
GSE46606_IRF4HIGH_VS_IRF4MID_CD40L_IL2_IL5_DAY3_STIMULATED_BCELL_UP	GSE46606_IRF4HIGH_VS_IRF4MID_CD40L_IL2_IL5_DAY3_STIMULATED_BCELL_UP		170	0.301523	1.25647	0.0348259	0.681381	1	2660	tags=29%, list=23%, signal=37%
HP_SHORT_THORAX	HP_SHORT_THORAX		35	0.407865	1.25508	0.160112	0.685351	1	1654	tags=26%, list=14%, signal=30%
GOBP_NEGATIVE_REGULATION_OF_LIPID_BIOSYNTHETIC_PROCESS	GOBP_NEGATIVE_REGULATION_OF_LIPID_BIOSYNTHETIC_PROCESS		35	0.405307	1.25461	0.169054	0.685691	1	1226	tags=26%, list=10%, signal=29%
GSE2770_UNTREATED_VS_IL4_TREATED_ACT_CD4_TCELL_2H_DN	GSE2770_UNTREATED_VS_IL4_TREATED_ACT_CD4_TCELL_2H_DN		166	0.304898	1.2541	0.069869	0.68623	1	2380	tags=25%, list=20%, signal=31%
GOBP_NUCLEOTIDE_EXCISION_REPAIR_DNA_INCISION	GOBP_NUCLEOTIDE_EXCISION_REPAIR_DNA_INCISION		30	0.411984	1.25381	0.168478	0.685893	1	1925	tags=23%, list=16%, signal=28%
GSE21927_SPLEEN_C57BL6_VS_4T1_TUMOR_BALBC_MONOCYTES_UP	GSE21927_SPLEEN_C57BL6_VS_4T1_TUMOR_BALBC_MONOCYTES_UP		150	0.307737	1.25317	0.0657277	0.686897	1	2012	tags=29%, list=17%, signal=35%
GOBP_AMYLOID_FIBRIL_FORMATION	GOBP_AMYLOID_FIBRIL_FORMATION		19	0.459036	1.25239	0.207692	0.688406	1	1459	tags=32%, list=12%, signal=36%
GOMF_ISOPEPTIDASE_ACTIVITY	GOMF_ISOPEPTIDASE_ACTIVITY		16	0.482602	1.25222	0.186636	0.687533	1	4172	tags=50%, list=35%, signal=77%
HP_ABNORMAL_URINARY_ELECTROLYTE_CONCENTRATION	HP_ABNORMAL_URINARY_ELECTROLYTE_CONCENTRATION		62	0.350469	1.25174	0.12945	0.687862	1	908	tags=18%, list=8%, signal=19%
HP_ABNORMALITY_OF_THE_CLITORIS	HP_ABNORMALITY_OF_THE_CLITORIS		70	0.348896	1.25113	0.105263	0.688793	1	2539	tags=29%, list=21%, signal=36%
HP_COLON_CANCER	HP_COLON_CANCER		39	0.390536	1.25096	0.153203	0.688007	1	3240	tags=44%, list=27%, signal=60%
GSE45365_CTRL_VS_MCMV_INFECTION_NK_CELL_DN	GSE45365_CTRL_VS_MCMV_INFECTION_NK_CELL_DN		145	0.306564	1.25076	0.0663717	0.687319	1	2548	tags=33%, list=22%, signal=42%
GSE14308_TH2_VS_TH17_DN	GSE14308_TH2_VS_TH17_DN		172	0.300033	1.2501	0.0384615	0.688535	1	2271	tags=28%, list=19%, signal=34%
HP_ABSENT_EARLOBE	HP_ABSENT_EARLOBE		15	0.479987	1.24731	0.18932	0.697979	1	2240	tags=27%, list=19%, signal=33%
GSE34156_NOD2_LIGAND_VS_NOD2_AND_TLR1_TLR2_LIGAND_6H_TREATED_MONOCYTE_UP	GSE34156_NOD2_LIGAND_VS_NOD2_AND_TLR1_TLR2_LIGAND_6H_TREATED_MONOCYTE_UP		141	0.308606	1.24688	0.0627615	0.69814	1	2213	tags=28%, list=19%, signal=34%
HP_AGANGLIONIC_MEGACOLON	HP_AGANGLIONIC_MEGACOLON		98	0.324822	1.24641	0.10728	0.698548	1	3135	tags=36%, list=27%, signal=48%
GOBP_NEGATIVE_REGULATION_OF_NUCLEOTIDE_METABOLIC_PROCESS	GOBP_NEGATIVE_REGULATION_OF_NUCLEOTIDE_METABOLIC_PROCESS		15	0.488198	1.24625	0.204819	0.697664	1	338	tags=20%, list=3%, signal=21%
KEGG_HUNTINGTONS_DISEASE	KEGG_HUNTINGTONS_DISEASE		129	0.312492	1.24591	0.0658436	0.697567	1	2588	tags=29%, list=22%, signal=37%
GSE25123_CTRL_VS_ROSIGLITAZONE_STIM_MACROPHAGE_DN	GSE25123_CTRL_VS_ROSIGLITAZONE_STIM_MACROPHAGE_DN		142	0.308785	1.24529	0.0950226	0.698431	1	2025	tags=25%, list=17%, signal=30%
GOMF_NUCLEOSOME_BINDING	GOMF_NUCLEOSOME_BINDING		49	0.368582	1.24506	0.149584	0.697912	1	2743	tags=27%, list=23%, signal=34%
GOBP_PSEUDOURIDINE_SYNTHESIS	GOBP_PSEUDOURIDINE_SYNTHESIS		17	0.462413	1.24483	0.201946	0.697364	1	3416	tags=47%, list=29%, signal=66%
GSE2197_CPG_DNA_VS_UNTREATED_IN_DC_DN	GSE2197_CPG_DNA_VS_UNTREATED_IN_DC_DN		149	0.309185	1.24466	0.0649351	0.696537	1	3272	tags=34%, list=28%, signal=47%
HP_SUBCAPSULAR_CATARACT	HP_SUBCAPSULAR_CATARACT		21	0.4532	1.2425	0.179104	0.703792	1	760	tags=14%, list=6%, signal=15%
GOBP_DNA_SYNTHESIS_INVOLVED_IN_DNA_REPAIR	GOBP_DNA_SYNTHESIS_INVOLVED_IN_DNA_REPAIR		39	0.39521	1.24242	0.158046	0.702678	1	2233	tags=23%, list=19%, signal=28%
HP_METABOLIC_ACIDOSIS	HP_METABOLIC_ACIDOSIS		106	0.32428	1.24225	0.0981132	0.701916	1	2677	tags=29%, list=23%, signal=37%
GSE21927_C26GM_VS_4T1_TUMOR_MONOCYTE_BALBC_DN	GSE21927_C26GM_VS_4T1_TUMOR_MONOCYTE_BALBC_DN		163	0.303057	1.24165	0.0552995	0.702926	1	3557	tags=42%, list=30%, signal=60%
GOCC_REPLISOME	GOCC_REPLISOME		17	0.462224	1.24122	0.211055	0.70314	1	3815	tags=53%, list=32%, signal=78%
HP_SPINAL_RIGIDITY	HP_SPINAL_RIGIDITY		39	0.376831	1.24096	0.145604	0.702733	1	91	tags=5%, list=1%, signal=5%
GOCC_CILIUM	GOCC_CILIUM		386	0.275471	1.24082	0.00917431	0.701826	1	1334	tags=19%, list=11%, signal=21%
GOCC_H4_HISTONE_ACETYLTRANSFERASE_COMPLEX	GOCC_H4_HISTONE_ACETYLTRANSFERASE_COMPLEX		43	0.373387	1.23989	0.167647	0.704087	1	5027	tags=63%, list=43%, signal=109%
GSE45365_BCELL_VS_CD8_TCELL_UP	GSE45365_BCELL_VS_CD8_TCELL_UP		90	0.330165	1.23984	0.0978261	0.702842	1	724	tags=12%, list=6%, signal=13%
GOBP_NON_RECOMBINATIONAL_REPAIR	GOBP_NON_RECOMBINATIONAL_REPAIR		78	0.341346	1.23887	0.104869	0.705267	1	2584	tags=28%, list=22%, signal=36%
GSE13547_CTRL_VS_ANTI_IGM_STIM_BCELL_12H_DN	GSE13547_CTRL_VS_ANTI_IGM_STIM_BCELL_12H_DN		146	0.300267	1.23874	0.0758294	0.704345	1	2283	tags=32%, list=19%, signal=39%
KEGG_ECM_RECEPTOR_INTERACTION	KEGG_ECM_RECEPTOR_INTERACTION		65	0.353499	1.23858	0.142857	0.703529	1	347	tags=11%, list=3%, signal=11%
GOCC_SNARE_COMPLEX	GOCC_SNARE_COMPLEX		39	0.380748	1.23809	0.148256	0.704123	1	3900	tags=56%, list=33%, signal=84%
GOMF_ENDONUCLEASE_ACTIVITY_ACTIVE_WITH_EITHER_RIBO_OR_DEOXYRIBONUCLEIC_ACIDS_AND_PRODUCING_5_PHOSPHOMONOESTERS	GOMF_ENDONUCLEASE_ACTIVITY_ACTIVE_WITH_EITHER_RIBO_OR_DEOXYRIBONUCLEIC_ACIDS_AND_PRODUCING_5_PHOSPHOMONOESTERS		34	0.399539	1.23798	0.15847	0.70316	1	3539	tags=50%, list=30%, signal=71%
GOBP_ENDOCHONDRAL_BONE_MORPHOGENESIS	GOBP_ENDOCHONDRAL_BONE_MORPHOGENESIS		40	0.38165	1.2366	0.154062	0.70732	1	813	tags=15%, list=7%, signal=16%
HP_GLIOBLASTOMA_MULTIFORME	HP_GLIOBLASTOMA_MULTIFORME		19	0.460159	1.23568	0.217604	0.709536	1	3219	tags=53%, list=27%, signal=72%
GSE41978_KLRG1_HIGH_VS_LOW_EFFECTOR_CD8_TCELL_DN	GSE41978_KLRG1_HIGH_VS_LOW_EFFECTOR_CD8_TCELL_DN		133	0.302951	1.23465	0.0733945	0.712144	1	695	tags=15%, list=6%, signal=16%
GOMF_DNA_HELICASE_ACTIVITY	GOMF_DNA_HELICASE_ACTIVITY		67	0.339265	1.23457	0.133333	0.711012	1	3816	tags=39%, list=32%, signal=57%
GOMF_GENERAL_TRANSCRIPTION_INITIATION_FACTOR_ACTIVITY	GOMF_GENERAL_TRANSCRIPTION_INITIATION_FACTOR_ACTIVITY		36	0.394577	1.23395	0.193548	0.712036	1	3758	tags=44%, list=32%, signal=65%
GSE22886_NAIVE_BCELL_VS_DC_UP	GSE22886_NAIVE_BCELL_VS_DC_UP		139	0.311414	1.23373	0.0995851	0.711424	1	831	tags=14%, list=7%, signal=15%
GSE26495_NAIVE_VS_PD1LOW_CD8_TCELL_UP	GSE26495_NAIVE_VS_PD1LOW_CD8_TCELL_UP		127	0.310293	1.23369	0.0708333	0.710153	1	1665	tags=24%, list=14%, signal=28%
GOBP_RRNA_MODIFICATION	GOBP_RRNA_MODIFICATION		33	0.401617	1.23341	0.190202	0.709863	1	3696	tags=42%, list=31%, signal=62%
HP_NEOPLASM_OF_THE_LARGE_INTESTINE	HP_NEOPLASM_OF_THE_LARGE_INTESTINE		85	0.332452	1.23316	0.101083	0.709444	1	1139	tags=19%, list=10%, signal=21%
GOBP_MUSCLE_FILAMENT_SLIDING	GOBP_MUSCLE_FILAMENT_SLIDING		18	0.456334	1.2329	0.208232	0.709031	1	500	tags=17%, list=4%, signal=17%
ANDERSON_BLOOD_CN54GP140_ADJUVANTED_WITH_GLA_AF_AGE_18_45YO_1DY_UP	ANDERSON_BLOOD_CN54GP140_ADJUVANTED_WITH_GLA_AF_AGE_18_45YO_1DY_UP		36	0.385278	1.23288	0.175487	0.707681	1	3086	tags=44%, list=26%, signal=60%
GSE42724_NAIVE_VS_B1_BCELL_DN	GSE42724_NAIVE_VS_B1_BCELL_DN		150	0.300969	1.23286	0.0913242	0.706335	1	2334	tags=27%, list=20%, signal=34%
HP_GONADAL_NEOPLASM	HP_GONADAL_NEOPLASM		67	0.344525	1.23233	0.123418	0.707039	1	996	tags=15%, list=8%, signal=16%
HP_PRIMARY_ADRENAL_INSUFFICIENCY	HP_PRIMARY_ADRENAL_INSUFFICIENCY		37	0.387096	1.23151	0.151934	0.708917	1	2386	tags=32%, list=20%, signal=41%
GSE9006_TYPE_1_DIABETES_AT_DX_VS_4MONTH_POST_DX_PBMC_DN	GSE9006_TYPE_1_DIABETES_AT_DX_VS_4MONTH_POST_DX_PBMC_DN		113	0.309612	1.23145	0.100806	0.707756	1	1953	tags=29%, list=17%, signal=35%
GOBP_PROTEIN_TARGETING	GOBP_PROTEIN_TARGETING		301	0.277689	1.2313	0.0461538	0.706982	1	2826	tags=32%, list=24%, signal=41%
HP_ABNORMALITY_OF_LIMB_EPIPHYSIS_MORPHOLOGY	HP_ABNORMALITY_OF_LIMB_EPIPHYSIS_MORPHOLOGY		79	0.330032	1.22997	0.124113	0.710897	1	1627	tags=18%, list=14%, signal=20%
GOBP_REGULATION_OF_KERATINOCYTE_DIFFERENTIATION	GOBP_REGULATION_OF_KERATINOCYTE_DIFFERENTIATION		27	0.413124	1.22986	0.192412	0.70992	1	582	tags=15%, list=5%, signal=16%
GOBP_MICROTUBULE_ANCHORING	GOBP_MICROTUBULE_ANCHORING		23	0.437311	1.2293	0.203046	0.710801	1	2561	tags=30%, list=22%, signal=39%
GSE27786_LIN_NEG_VS_NKCELL_UP	GSE27786_LIN_NEG_VS_NKCELL_UP		160	0.298221	1.22833	0.0905172	0.713399	1	2929	tags=33%, list=25%, signal=43%
GOBP_ESTABLISHMENT_OF_PROTEIN_LOCALIZATION_TO_MEMBRANE	GOBP_ESTABLISHMENT_OF_PROTEIN_LOCALIZATION_TO_MEMBRANE		230	0.28479	1.22605	0.0596026	0.721114	1	2784	tags=33%, list=24%, signal=42%
HP_DECREASED_FERTILITY	HP_DECREASED_FERTILITY		135	0.308838	1.22502	0.0818182	0.723855	1	1867	tags=25%, list=16%, signal=30%
GOCC_PROTON_TRANSPORTING_TWO_SECTOR_ATPASE_COMPLEX	GOCC_PROTON_TRANSPORTING_TWO_SECTOR_ATPASE_COMPLEX		36	0.393128	1.22485	0.152284	0.72308	1	1742	tags=25%, list=15%, signal=29%
HP_ABNORMALITY_OF_THE_OVARY	HP_ABNORMALITY_OF_THE_OVARY		178	0.290961	1.22468	0.0492611	0.72238	1	3030	tags=31%, list=26%, signal=42%
GOCC_CYTOCHROME_COMPLEX	GOCC_CYTOCHROME_COMPLEX		22	0.429972	1.22396	0.190231	0.723885	1	3554	tags=50%, list=30%, signal=71%
GSE11961_PLASMA_CELL_DAY7_VS_GERMINAL_CENTER_BCELL_DAY40_DN	GSE11961_PLASMA_CELL_DAY7_VS_GERMINAL_CENTER_BCELL_DAY40_DN		138	0.306929	1.22306	0.0793651	0.726188	1	1714	tags=17%, list=15%, signal=19%
HP_ABNORMALITY_OF_THE_MUSCULATURE_OF_THE_LOWER_LIMBS	HP_ABNORMALITY_OF_THE_MUSCULATURE_OF_THE_LOWER_LIMBS		74	0.338621	1.22268	0.132686	0.72638	1	492	tags=11%, list=4%, signal=11%
GSE25123_CTRL_VS_IL4_AND_ROSIGLITAZONE_STIM_MACROPHAGE_DN	GSE25123_CTRL_VS_IL4_AND_ROSIGLITAZONE_STIM_MACROPHAGE_DN		128	0.310847	1.2226	0.07173	0.725282	1	2314	tags=30%, list=20%, signal=37%
HP_PROGRESSIVE_EXTERNAL_OPHTHALMOPLEGIA	HP_PROGRESSIVE_EXTERNAL_OPHTHALMOPLEGIA		21	0.428364	1.22245	0.199475	0.724437	1	3203	tags=38%, list=27%, signal=52%
HP_ABNORMALITY_OF_ACID_BASE_HOMEOSTASIS	HP_ABNORMALITY_OF_ACID_BASE_HOMEOSTASIS		286	0.287449	1.22202	0.0503597	0.724808	1	2620	tags=26%, list=22%, signal=32%
GOBP_MITOCHONDRIAL_RNA_PROCESSING	GOBP_MITOCHONDRIAL_RNA_PROCESSING		17	0.464154	1.22077	0.206089	0.72862	1	3931	tags=59%, list=33%, signal=88%
GOBP_RESPIRATORY_GASEOUS_EXCHANGE_BY_RESPIRATORY_SYSTEM	GOBP_RESPIRATORY_GASEOUS_EXCHANGE_BY_RESPIRATORY_SYSTEM		43	0.370011	1.22056	0.147799	0.72812	1	1812	tags=26%, list=15%, signal=30%
GOCC_MITOCHONDRIAL_MATRIX	GOCC_MITOCHONDRIAL_MATRIX		393	0.27446	1.21961	0.0222222	0.730664	1	2806	tags=30%, list=24%, signal=38%
HP_GYNECOMASTIA	HP_GYNECOMASTIA		57	0.350008	1.21892	0.158228	0.732164	1	860	tags=14%, list=7%, signal=15%
GSE14000_TRANSLATED_RNA_VS_MRNA_4H_LPS_DC_DN	GSE14000_TRANSLATED_RNA_VS_MRNA_4H_LPS_DC_DN		113	0.314013	1.21891	0.126923	0.730839	1	2530	tags=32%, list=21%, signal=40%
GSE26030_TH1_VS_TH17_RESTIMULATED_DAY5_POST_POLARIZATION_UP	GSE26030_TH1_VS_TH17_RESTIMULATED_DAY5_POST_POLARIZATION_UP		140	0.302011	1.21887	0.109244	0.729582	1	2225	tags=33%, list=19%, signal=40%
GOCC_CILIARY_PLASM	GOCC_CILIARY_PLASM		72	0.334172	1.21865	0.122867	0.729059	1	2578	tags=40%, list=22%, signal=51%
HP_TYPE_II_LISSENCEPHALY	HP_TYPE_II_LISSENCEPHALY		15	0.484648	1.21824	0.22695	0.729384	1	277	tags=13%, list=2%, signal=14%
GSE17721_POLYIC_VS_PAM3CSK4_0.5H_BMDC_UP	GSE17721_POLYIC_VS_PAM3CSK4_0.5H_BMDC_UP		126	0.309079	1.21746	0.127413	0.731256	1	2249	tags=29%, list=19%, signal=36%
HP_ABNORMALITY_OF_THE_TESTIS_SIZE	HP_ABNORMALITY_OF_THE_TESTIS_SIZE		110	0.315858	1.21673	0.118519	0.73281	1	1867	tags=23%, list=16%, signal=27%
HP_INCREASED_CIRCULATING_GONADOTROPIN_LEVEL	HP_INCREASED_CIRCULATING_GONADOTROPIN_LEVEL		32	0.393141	1.21629	0.193642	0.733182	1	569	tags=13%, list=5%, signal=13%
GOBP_ALDITOL_METABOLIC_PROCESS	GOBP_ALDITOL_METABOLIC_PROCESS		17	0.46174	1.21627	0.211587	0.731873	1	295	tags=12%, list=2%, signal=12%
GOBP_INNER_EAR_RECEPTOR_CELL_STEREOCILIUM_ORGANIZATION	GOBP_INNER_EAR_RECEPTOR_CELL_STEREOCILIUM_ORGANIZATION		18	0.453979	1.21502	0.230971	0.735717	1	1685	tags=33%, list=14%, signal=39%
GOBP_SPERM_MOTILITY	GOBP_SPERM_MOTILITY		36	0.388567	1.21494	0.202667	0.734619	1	911	tags=25%, list=8%, signal=27%
HP_EMG_IMPAIRED_NEUROMUSCULAR_TRANSMISSION	HP_EMG_IMPAIRED_NEUROMUSCULAR_TRANSMISSION		16	0.474087	1.21359	0.224096	0.738837	1	1440	tags=31%, list=12%, signal=36%
GOBP_REGULATION_OF_GLUCOSE_METABOLIC_PROCESS	GOBP_REGULATION_OF_GLUCOSE_METABOLIC_PROCESS		87	0.328323	1.2124	0.113333	0.74245	1	1493	tags=16%, list=13%, signal=18%
HARALAMBIEVA_PBMC_FLUARIX_AGE_50_74YO_CORR_WITH_28D_MEM_B_CELL_RESPONSE_AT_3DY_NEGATIVE	HARALAMBIEVA_PBMC_FLUARIX_AGE_50_74YO_CORR_WITH_28D_MEM_B_CELL_RESPONSE_AT_3DY_NEGATIVE		481	0.260606	1.21231	0.0123457	0.741426	1	3922	tags=41%, list=33%, signal=58%
GSE1460_INTRATHYMIC_T_PROGENITOR_VS_THYMIC_STROMAL_CELL_UP	GSE1460_INTRATHYMIC_T_PROGENITOR_VS_THYMIC_STROMAL_CELL_UP		158	0.292989	1.21194	0.0590909	0.741489	1	2279	tags=22%, list=19%, signal=26%
GOBP_NEGATIVE_REGULATION_OF_MRNA_SPLICING_VIA_SPLICEOSOME	GOBP_NEGATIVE_REGULATION_OF_MRNA_SPLICING_VIA_SPLICEOSOME		16	0.467618	1.21161	0.230769	0.741496	1	4143	tags=44%, list=35%, signal=67%
HP_DECREASED_TESTICULAR_SIZE	HP_DECREASED_TESTICULAR_SIZE		81	0.326853	1.21123	0.123711	0.741767	1	1859	tags=23%, list=16%, signal=28%
HP_ABNORMAL_VAGINA_MORPHOLOGY	HP_ABNORMAL_VAGINA_MORPHOLOGY		69	0.340246	1.21091	0.150641	0.741785	1	2490	tags=33%, list=21%, signal=42%
GOCC_PROTEIN_ACETYLTRANSFERASE_COMPLEX	GOCC_PROTEIN_ACETYLTRANSFERASE_COMPLEX		84	0.326925	1.21057	0.122302	0.741773	1	4209	tags=42%, list=36%, signal=64%
GOBP_PROTEIN_LOCALIZATION_TO_CHROMOSOME	GOBP_PROTEIN_LOCALIZATION_TO_CHROMOSOME		83	0.322898	1.21036	0.135314	0.741331	1	2673	tags=23%, list=23%, signal=29%
SCHERER_PBMC_YF_VAX_OR_APSV_WETVAX_AGE_18_40YO_JOINT_TO_VACCINIA_AND_YELLOW_FEVER_DN	SCHERER_PBMC_YF_VAX_OR_APSV_WETVAX_AGE_18_40YO_JOINT_TO_VACCINIA_AND_YELLOW_FEVER_DN		17	0.455809	1.21011	0.204706	0.740948	1	408	tags=24%, list=3%, signal=24%
GOCC_NON_MOTILE_CILIUM	GOCC_NON_MOTILE_CILIUM		77	0.327437	1.20918	0.133803	0.743366	1	1946	tags=27%, list=16%, signal=32%
GOBP_PROTEIN_TARGETING_TO_MITOCHONDRION	GOBP_PROTEIN_TARGETING_TO_MITOCHONDRION		79	0.326746	1.20912	0.109635	0.742224	1	2223	tags=27%, list=19%, signal=33%
HP_ABNORMAL_SIZE_OF_THE_CLITORIS	HP_ABNORMAL_SIZE_OF_THE_CLITORIS		53	0.352903	1.2091	0.162722	0.740933	1	2539	tags=30%, list=21%, signal=38%
ZAK_PBMC_MRKAD5_HIV_1_GAG_POL_NEF_AGE_20_50YO_CORRELATED_WITH_CD8_T_CELL_RESPONSE_3DY_POSITIVE	ZAK_PBMC_MRKAD5_HIV_1_GAG_POL_NEF_AGE_20_50YO_CORRELATED_WITH_CD8_T_CELL_RESPONSE_3DY_POSITIVE		61	0.338899	1.20877	0.161765	0.740915	1	3571	tags=43%, list=30%, signal=61%
GOBP_NEGATIVE_REGULATION_OF_LIPID_METABOLIC_PROCESS	GOBP_NEGATIVE_REGULATION_OF_LIPID_METABOLIC_PROCESS		63	0.342067	1.20856	0.146875	0.74045	1	1268	tags=21%, list=11%, signal=23%
GOBP_NCRNA_METABOLIC_PROCESS	GOBP_NCRNA_METABOLIC_PROCESS		402	0.267455	1.20856	0.01	0.739103	1	2999	tags=31%, list=25%, signal=40%
GSE5542_IFNA_VS_IFNA_AND_IFNG_TREATED_EPITHELIAL_CELLS_24H_DN	GSE5542_IFNA_VS_IFNA_AND_IFNG_TREATED_EPITHELIAL_CELLS_24H_DN		160	0.29541	1.20838	0.0790698	0.738527	1	2608	tags=28%, list=22%, signal=35%
GSE20727_CTRL_VS_DNFB_ALLERGEN_TREATED_DC_DN	GSE20727_CTRL_VS_DNFB_ALLERGEN_TREATED_DC_DN		118	0.30772	1.2083	0.129278	0.737499	1	1865	tags=26%, list=16%, signal=31%
HP_ABNORMAL_LABIA_MORPHOLOGY	HP_ABNORMAL_LABIA_MORPHOLOGY		56	0.345122	1.20793	0.17737	0.737765	1	1290	tags=14%, list=11%, signal=16%
GSE6259_FLT3L_INDUCED_33D1_POS_DC_VS_BCELL_UP	GSE6259_FLT3L_INDUCED_33D1_POS_DC_VS_BCELL_UP		157	0.297907	1.20685	0.0909091	0.740882	1	2806	tags=32%, list=24%, signal=41%
GOBP_REPLACEMENT_OSSIFICATION	GOBP_REPLACEMENT_OSSIFICATION		23	0.419708	1.20615	0.212195	0.742482	1	813	tags=17%, list=7%, signal=19%
HP_ABNORMALITY_OF_THE_SHOULDER_GIRDLE_MUSCULATURE	HP_ABNORMALITY_OF_THE_SHOULDER_GIRDLE_MUSCULATURE		82	0.319414	1.20606	0.131673	0.741525	1	1643	tags=17%, list=14%, signal=20%
HP_ABNORMALITY_OF_THE_AXILLARY_HAIR	HP_ABNORMALITY_OF_THE_AXILLARY_HAIR		26	0.41348	1.2056	0.213592	0.742018	1	1883	tags=31%, list=16%, signal=37%
GOMF_HYDROLASE_ACTIVITY_ACTING_ON_CARBON_NITROGEN_BUT_NOT_PEPTIDE_BONDS	GOMF_HYDROLASE_ACTIVITY_ACTING_ON_CARBON_NITROGEN_BUT_NOT_PEPTIDE_BONDS		75	0.327406	1.20556	0.149068	0.74086	1	1680	tags=21%, list=14%, signal=25%
GOBP_PROTEIN_AUTOUBIQUITINATION	GOBP_PROTEIN_AUTOUBIQUITINATION		55	0.350933	1.20518	0.171975	0.74113	1	996	tags=15%, list=8%, signal=16%
GSE369_SOCS3_KO_VS_WT_LIVER_DN	GSE369_SOCS3_KO_VS_WT_LIVER_DN		167	0.288168	1.20518	0.0872093	0.739806	1	2520	tags=23%, list=21%, signal=29%
GOMF_ATPASE_ACTIVITY_COUPLED_TO_TRANSMEMBRANE_MOVEMENT_OF_IONS_ROTATIONAL_MECHANISM	GOMF_ATPASE_ACTIVITY_COUPLED_TO_TRANSMEMBRANE_MOVEMENT_OF_IONS_ROTATIONAL_MECHANISM		17	0.454693	1.20477	0.23445	0.740159	1	4	tags=6%, list=0%, signal=6%
GOBP_REGULATION_OF_DNA_REPAIR	GOBP_REGULATION_OF_DNA_REPAIR		106	0.30888	1.20459	0.112	0.739612	1	1996	tags=23%, list=17%, signal=27%
GSE27786_NKTCELL_VS_ERYTHROBLAST_UP	GSE27786_NKTCELL_VS_ERYTHROBLAST_UP		162	0.292026	1.20459	0.1	0.738297	1	3017	tags=30%, list=26%, signal=40%
GSE5099_UNSTIM_VS_MCSF_TREATED_MONOCYTE_DAY7_UP	GSE5099_UNSTIM_VS_MCSF_TREATED_MONOCYTE_DAY7_UP		168	0.284648	1.2044	0.103448	0.737743	1	3903	tags=43%, list=33%, signal=63%
HP_ACANTHOSIS_NIGRICANS	HP_ACANTHOSIS_NIGRICANS		31	0.396811	1.20436	0.192412	0.736599	1	1284	tags=26%, list=11%, signal=29%
HP_METAPHYSEAL_IRREGULARITY	HP_METAPHYSEAL_IRREGULARITY		37	0.36373	1.20427	0.176812	0.735603	1	1633	tags=22%, list=14%, signal=25%
GOBP_REGULATION_OF_OXIDATIVE_STRESS_INDUCED_CELL_DEATH	GOBP_REGULATION_OF_OXIDATIVE_STRESS_INDUCED_CELL_DEATH		47	0.354468	1.20366	0.190202	0.736807	1	303	tags=6%, list=3%, signal=7%
GOBP_REGULATION_OF_HORMONE_SECRETION	GOBP_REGULATION_OF_HORMONE_SECRETION		152	0.292859	1.20271	0.0772947	0.739541	1	878	tags=14%, list=7%, signal=15%
HP_NONIMMUNE_HYDROPS_FETALIS	HP_NONIMMUNE_HYDROPS_FETALIS		29	0.398351	1.2023	0.221354	0.739866	1	1139	tags=28%, list=10%, signal=30%
GOBP_TRANSCRIPTION_BY_RNA_POLYMERASE_I	GOBP_TRANSCRIPTION_BY_RNA_POLYMERASE_I		54	0.346926	1.20218	0.20303	0.739077	1	2743	tags=31%, list=23%, signal=41%
BRCA1_DN.V1_UP	BRCA1_DN.V1_UP		52	0.348887	1.20176	0.159639	0.739483	1	1511	tags=27%, list=13%, signal=31%
HP_11_PAIRS_OF_RIBS	HP_11_PAIRS_OF_RIBS		20	0.429497	1.20174	0.229008	0.738286	1	2240	tags=40%, list=19%, signal=49%
HP_APLASIA_HYPOPLASIA_OF_THE_THUMB	HP_APLASIA_HYPOPLASIA_OF_THE_THUMB		92	0.318663	1.20095	0.156934	0.740242	1	1375	tags=21%, list=12%, signal=23%
HP_ABNORMALITY_OF_THE_PUBIC_HAIR	HP_ABNORMALITY_OF_THE_PUBIC_HAIR		27	0.406978	1.20088	0.200542	0.739227	1	1563	tags=22%, list=13%, signal=26%
GOBP_PROTEIN_TRANSPORT_ALONG_MICROTUBULE	GOBP_PROTEIN_TRANSPORT_ALONG_MICROTUBULE		54	0.352553	1.20059	0.178344	0.739109	1	1334	tags=33%, list=11%, signal=37%
GSE14413_UNSTIM_VS_IFNB_STIM_NIH3T3_CELLS_DN	GSE14413_UNSTIM_VS_IFNB_STIM_NIH3T3_CELLS_DN		116	0.301038	1.19988	0.101961	0.74081	1	2212	tags=23%, list=19%, signal=28%
GSE28449_WT_VS_LRF_KO_GERMINAL_CENTER_BCELL_DN	GSE28449_WT_VS_LRF_KO_GERMINAL_CENTER_BCELL_DN		137	0.295441	1.19921	0.0991735	0.742283	1	847	tags=13%, list=7%, signal=14%
GOMF_DEOXYRIBONUCLEASE_ACTIVITY	GOMF_DEOXYRIBONUCLEASE_ACTIVITY		47	0.360736	1.19826	0.1625	0.744973	1	2798	tags=32%, list=24%, signal=42%
GSE17721_CTRL_VS_GARDIQUIMOD_8H_BMDC_UP	GSE17721_CTRL_VS_GARDIQUIMOD_8H_BMDC_UP		164	0.283023	1.19683	0.125	0.749697	1	1621	tags=21%, list=14%, signal=24%
HP_ABNORMALITY_OF_SECONDARY_SEXUAL_HAIR	HP_ABNORMALITY_OF_SECONDARY_SEXUAL_HAIR		33	0.384271	1.19673	0.204986	0.748815	1	1883	tags=27%, list=16%, signal=32%
GOMF_O_METHYLTRANSFERASE_ACTIVITY	GOMF_O_METHYLTRANSFERASE_ACTIVITY		21	0.427244	1.19669	0.200477	0.747681	1	2903	tags=29%, list=25%, signal=38%
HP_ABNORMALITY_OF_THE_DENTAL_PULP	HP_ABNORMALITY_OF_THE_DENTAL_PULP		33	0.378586	1.19661	0.200573	0.746733	1	2782	tags=39%, list=24%, signal=51%
GSE1740_UNSTIM_VS_IFNA_STIMULATED_MCSF_DERIVED_MACROPHAGE_UP	GSE1740_UNSTIM_VS_IFNA_STIMULATED_MCSF_DERIVED_MACROPHAGE_UP		97	0.310399	1.19625	0.126394	0.746963	1	2248	tags=21%, list=19%, signal=25%
HP_ABNORMALITY_OF_THE_DENTAL_ROOT	HP_ABNORMALITY_OF_THE_DENTAL_ROOT		32	0.387698	1.19605	0.204188	0.746515	1	2782	tags=41%, list=24%, signal=53%
HP_ABNORMALITY_OF_ALKALINE_PHOSPHATASE_LEVEL	HP_ABNORMALITY_OF_ALKALINE_PHOSPHATASE_LEVEL		64	0.33085	1.19579	0.14433	0.746324	1	813	tags=16%, list=7%, signal=17%
GSE13522_CTRL_VS_T_CRUZI_BRAZIL_STRAIN_INF_SKIN_UP	GSE13522_CTRL_VS_T_CRUZI_BRAZIL_STRAIN_INF_SKIN_UP		99	0.321149	1.19574	0.142276	0.745214	1	1247	tags=15%, list=11%, signal=17%
HP_NEOPLASM_OF_THE_BREAST	HP_NEOPLASM_OF_THE_BREAST		70	0.334693	1.19549	0.132653	0.745045	1	1284	tags=21%, list=11%, signal=24%
HP_ABNORMAL_CIRCULATING_FOLLICLE_STIMULATING_HORMONE_LEVEL	HP_ABNORMAL_CIRCULATING_FOLLICLE_STIMULATING_HORMONE_LEVEL		26	0.406219	1.19547	0.211196	0.743819	1	50	tags=8%, list=0%, signal=8%
HP_ABSENT_HAIR	HP_ABSENT_HAIR		28	0.404497	1.19498	0.230563	0.74462	1	1225	tags=25%, list=10%, signal=28%
GOCC_NUCLEAR_EXOSOME_RNASE_COMPLEX	GOCC_NUCLEAR_EXOSOME_RNASE_COMPLEX		15	0.481911	1.19429	0.265854	0.74618	1	2108	tags=33%, list=18%, signal=41%
GOBP_MITOCHONDRIAL_ATP_SYNTHESIS_COUPLED_PROTON_TRANSPORT	GOBP_MITOCHONDRIAL_ATP_SYNTHESIS_COUPLED_PROTON_TRANSPORT		16	0.449424	1.19362	0.2125	0.747687	1	3622	tags=63%, list=31%, signal=90%
GOBP_SPERMATID_DIFFERENTIATION	GOBP_SPERMATID_DIFFERENTIATION		77	0.328032	1.19294	0.14	0.749163	1	911	tags=21%, list=8%, signal=22%
HP_HYPERVENTILATION	HP_HYPERVENTILATION		19	0.442302	1.19237	0.243373	0.75028	1	1380	tags=16%, list=12%, signal=18%
GOBP_NEUROPEPTIDE_SIGNALING_PATHWAY	GOBP_NEUROPEPTIDE_SIGNALING_PATHWAY		21	0.433351	1.19229	0.2475	0.749346	1	930	tags=24%, list=8%, signal=26%
GSE21670_TGFB_VS_IL6_TREATED_CD4_TCELL_DN	GSE21670_TGFB_VS_IL6_TREATED_CD4_TCELL_DN		158	0.28802	1.19181	0.104348	0.750116	1	2369	tags=30%, list=20%, signal=37%
GSE2770_TGFB_AND_IL4_VS_IL12_TREATED_ACT_CD4_TCELL_2H_UP	GSE2770_TGFB_AND_IL4_VS_IL12_TREATED_ACT_CD4_TCELL_2H_UP		132	0.300356	1.1916	0.104072	0.749816	1	2292	tags=27%, list=19%, signal=33%
GOMF_OXIDOREDUCTASE_ACTIVITY_ACTING_ON_NAD_P_H	GOMF_OXIDOREDUCTASE_ACTIVITY_ACTING_ON_NAD_P_H		77	0.318894	1.19056	0.131387	0.752815	1	2807	tags=32%, list=24%, signal=42%
HP_ABNORMALITY_OF_THE_CALF_MUSCULATURE	HP_ABNORMALITY_OF_THE_CALF_MUSCULATURE		52	0.357599	1.19039	0.175896	0.752334	1	391	tags=12%, list=3%, signal=12%
GSE4142_GC_BCELL_VS_MEMORY_BCELL_DN	GSE4142_GC_BCELL_VS_MEMORY_BCELL_DN		153	0.296851	1.18918	0.120773	0.756185	1	2158	tags=25%, list=18%, signal=30%
HP_APLASIA_HYPOPLASIA_OF_THE_OVARY	HP_APLASIA_HYPOPLASIA_OF_THE_OVARY		50	0.350264	1.1878	0.201201	0.760771	1	1212	tags=16%, list=10%, signal=18%
GOMF_PEPTIDE_N_ACETYLTRANSFERASE_ACTIVITY	GOMF_PEPTIDE_N_ACETYLTRANSFERASE_ACTIVITY		42	0.369089	1.18743	0.195846	0.761045	1	2419	tags=21%, list=20%, signal=27%
GOMF_TBP_CLASS_PROTEIN_BINDING	GOMF_TBP_CLASS_PROTEIN_BINDING		23	0.417629	1.18706	0.232143	0.761349	1	2468	tags=35%, list=21%, signal=44%
HP_ABNORMAL_LOCALIZATION_OF_KIDNEY	HP_ABNORMAL_LOCALIZATION_OF_KIDNEY		125	0.300583	1.1869	0.121339	0.760721	1	3040	tags=36%, list=26%, signal=48%
HP_FLAT_ACETABULAR_ROOF	HP_FLAT_ACETABULAR_ROOF		19	0.42064	1.18662	0.228438	0.760634	1	1805	tags=16%, list=15%, signal=19%
KEGG_PYRUVATE_METABOLISM	KEGG_PYRUVATE_METABOLISM		31	0.388023	1.18615	0.223188	0.76134	1	1317	tags=16%, list=11%, signal=18%
HP_AVASCULAR_NECROSIS_OF_THE_CAPITAL_FEMORAL_EPIPHYSIS	HP_AVASCULAR_NECROSIS_OF_THE_CAPITAL_FEMORAL_EPIPHYSIS		18	0.434009	1.1858	0.25	0.761582	1	2010	tags=28%, list=17%, signal=33%
GOMF_GAMMA_TUBULIN_BINDING	GOMF_GAMMA_TUBULIN_BINDING		26	0.403051	1.18453	0.216418	0.765573	1	1474	tags=23%, list=12%, signal=26%
GSE18791_UNSTIM_VS_NEWCATSLE_VIRUS_DC_2H_DN	GSE18791_UNSTIM_VS_NEWCATSLE_VIRUS_DC_2H_DN		101	0.312093	1.18448	0.0933852	0.764494	1	2375	tags=31%, list=20%, signal=38%
GOBP_PROTEIN_LOCALIZATION_TO_CILIUM	GOBP_PROTEIN_LOCALIZATION_TO_CILIUM		48	0.347652	1.18446	0.175439	0.763321	1	3064	tags=44%, list=26%, signal=59%
GOMF_CATALYTIC_ACTIVITY_ACTING_ON_RNA	GOMF_CATALYTIC_ACTIVITY_ACTING_ON_RNA		315	0.266181	1.18442	0.031746	0.762207	1	3636	tags=35%, list=31%, signal=49%
GSE14415_FOXP3_KO_NATURAL_TREG_VS_TCONV_DN	GSE14415_FOXP3_KO_NATURAL_TREG_VS_TCONV_DN		140	0.292964	1.1843	0.131687	0.761495	1	2211	tags=31%, list=19%, signal=38%
HP_PRIMARY_AMENORRHEA	HP_PRIMARY_AMENORRHEA		67	0.325229	1.18338	0.161716	0.764082	1	2362	tags=27%, list=20%, signal=33%
HP_NECK_FLEXOR_WEAKNESS	HP_NECK_FLEXOR_WEAKNESS		24	0.404356	1.18323	0.232843	0.763428	1	2019	tags=29%, list=17%, signal=35%
GOCC_MITOCHONDRIAL_SMALL_RIBOSOMAL_SUBUNIT	GOCC_MITOCHONDRIAL_SMALL_RIBOSOMAL_SUBUNIT		24	0.405556	1.18305	0.244275	0.762916	1	3431	tags=46%, list=29%, signal=64%
GOBP_NEGATIVE_REGULATION_OF_TRANSLATIONAL_INITIATION	GOBP_NEGATIVE_REGULATION_OF_TRANSLATIONAL_INITIATION		16	0.460331	1.18295	0.263158	0.762086	1	2449	tags=31%, list=21%, signal=39%
HP_ADIPOSE_TISSUE_LOSS	HP_ADIPOSE_TISSUE_LOSS		25	0.402455	1.18235	0.235589	0.763363	1	124	tags=8%, list=1%, signal=8%
HP_APLASIA_HYPOPLASIA_OF_THE_EYELID	HP_APLASIA_HYPOPLASIA_OF_THE_EYELID		27	0.394733	1.18233	0.233422	0.762192	1	1193	tags=26%, list=10%, signal=29%
GOBP_RNA_POLYMERASE_II_PREINITIATION_COMPLEX_ASSEMBLY	GOBP_RNA_POLYMERASE_II_PREINITIATION_COMPLEX_ASSEMBLY		20	0.425582	1.18159	0.230576	0.764061	1	3587	tags=45%, list=30%, signal=65%
HP_REDUCED_VITAL_CAPACITY	HP_REDUCED_VITAL_CAPACITY		16	0.454393	1.18153	0.241294	0.763072	1	1602	tags=38%, list=14%, signal=43%
HP_RENAL_HYPOPLASIA_APLASIA	HP_RENAL_HYPOPLASIA_APLASIA		224	0.27515	1.18148	0.0807453	0.762047	1	2506	tags=27%, list=21%, signal=33%
GOBP_DOPAMINE_METABOLIC_PROCESS	GOBP_DOPAMINE_METABOLIC_PROCESS		19	0.442926	1.18138	0.23918	0.761242	1	557	tags=16%, list=5%, signal=17%
HP_PYRIDOXINE_RESPONSIVE_SIDEROBLASTIC_ANEMIA	HP_PYRIDOXINE_RESPONSIVE_SIDEROBLASTIC_ANEMIA		22	0.409641	1.18079	0.242424	0.762509	1	3942	tags=59%, list=33%, signal=89%
HP_MUSCULAR_DYSTROPHY	HP_MUSCULAR_DYSTROPHY		65	0.33031	1.18008	0.163265	0.76426	1	391	tags=9%, list=3%, signal=9%
HP_ABNORMAL_CIRCULATING_GONADOTROPIN_LEVEL	HP_ABNORMAL_CIRCULATING_GONADOTROPIN_LEVEL		47	0.357257	1.18	0.210227	0.763367	1	603	tags=13%, list=5%, signal=13%
GOBP_RNA_SPLICING	GOBP_RNA_SPLICING		363	0.257603	1.17974	0.0520833	0.763184	1	3800	tags=36%, list=32%, signal=51%
GOBP_MRNA_PROCESSING	GOBP_MRNA_PROCESSING		413	0.260879	1.17944	0.03125	0.763166	1	3800	tags=34%, list=32%, signal=49%
GOBP_MALE_MEIOTIC_NUCLEAR_DIVISION	GOBP_MALE_MEIOTIC_NUCLEAR_DIVISION		26	0.404914	1.17942	0.240741	0.762036	1	949	tags=19%, list=8%, signal=21%
GOBP_STEROID_BIOSYNTHETIC_PROCESS	GOBP_STEROID_BIOSYNTHETIC_PROCESS		129	0.294093	1.17855	0.138075	0.764477	1	1400	tags=19%, list=12%, signal=22%
GSE46143_CTRL_VS_LMP2A_TRANSDUCED_CD10_POS_GC_BCELL_UP	GSE46143_CTRL_VS_LMP2A_TRANSDUCED_CD10_POS_GC_BCELL_UP		138	0.292707	1.17737	0.125561	0.768239	1	988	tags=12%, list=8%, signal=13%
GSE15330_HSC_VS_LYMPHOID_PRIMED_MULTIPOTENT_PROGENITOR_IKAROS_KO_UP	GSE15330_HSC_VS_LYMPHOID_PRIMED_MULTIPOTENT_PROGENITOR_IKAROS_KO_UP		155	0.288575	1.17693	0.119816	0.768898	1	2445	tags=30%, list=21%, signal=37%
GOCC_CARBOXY_TERMINAL_DOMAIN_PROTEIN_KINASE_COMPLEX	GOCC_CARBOXY_TERMINAL_DOMAIN_PROTEIN_KINASE_COMPLEX		18	0.432135	1.17662	0.256293	0.769013	1	4196	tags=56%, list=36%, signal=86%
GOCC_INO80_TYPE_COMPLEX	GOCC_INO80_TYPE_COMPLEX		23	0.412559	1.17582	0.251889	0.771149	1	2735	tags=30%, list=23%, signal=40%
GSE41867_NAIVE_VS_DAY8_LCMV_EFFECTOR_CD8_TCELL_UP	GSE41867_NAIVE_VS_DAY8_LCMV_EFFECTOR_CD8_TCELL_UP		171	0.281698	1.17454	0.0878049	0.775482	1	2209	tags=25%, list=19%, signal=30%
GOCC_GABA_ERGIC_SYNAPSE	GOCC_GABA_ERGIC_SYNAPSE		28	0.384288	1.17376	0.246851	0.777602	1	82	tags=7%, list=1%, signal=7%
HP_HYPERLORDOSIS	HP_HYPERLORDOSIS		141	0.288501	1.17347	0.125	0.777624	1	1633	tags=16%, list=14%, signal=18%
GOMF_MIRNA_BINDING	GOMF_MIRNA_BINDING		25	0.412107	1.17282	0.246851	0.779224	1	4883	tags=64%, list=41%, signal=109%
GOBP_SECONDARY_METABOLIC_PROCESS	GOBP_SECONDARY_METABOLIC_PROCESS		23	0.396843	1.17224	0.254808	0.780422	1	710	tags=22%, list=6%, signal=23%
GSE22033_WT_VS_PPARG_KO_MEF_UP	GSE22033_WT_VS_PPARG_KO_MEF_UP		141	0.292754	1.1717	0.14346	0.781404	1	1668	tags=21%, list=14%, signal=24%
GOMF_3_5_EXONUCLEASE_ACTIVITY	GOMF_3_5_EXONUCLEASE_ACTIVITY		51	0.345109	1.17165	0.195719	0.780384	1	4214	tags=49%, list=36%, signal=76%
GOMF_CYTOSKELETAL_ANCHOR_ACTIVITY	GOMF_CYTOSKELETAL_ANCHOR_ACTIVITY		18	0.433526	1.17131	0.250608	0.780617	1	1059	tags=28%, list=9%, signal=30%
GOBP_RNA_INTERFERENCE	GOBP_RNA_INTERFERENCE		16	0.446845	1.17123	0.263415	0.779759	1	2439	tags=25%, list=21%, signal=31%
GSE3982_BASOPHIL_VS_TH1_UP	GSE3982_BASOPHIL_VS_TH1_UP		154	0.291329	1.17096	0.110577	0.779625	1	1598	tags=20%, list=14%, signal=23%
GOBP_KERATAN_SULFATE_BIOSYNTHETIC_PROCESS	GOBP_KERATAN_SULFATE_BIOSYNTHETIC_PROCESS		20	0.425479	1.17082	0.258824	0.779019	1	1900	tags=30%, list=16%, signal=36%
HP_DUPLICATION_OF_HAND_BONES	HP_DUPLICATION_OF_HAND_BONES		161	0.285695	1.17076	0.110048	0.778066	1	2577	tags=28%, list=22%, signal=35%
HP_APLASIA_HYPOPLASIA_OF_THE_RIBS	HP_APLASIA_HYPOPLASIA_OF_THE_RIBS		80	0.320884	1.1694	0.191489	0.782651	1	1439	tags=21%, list=12%, signal=24%
GOBP_REGULATION_OF_RESPONSE_TO_OXIDATIVE_STRESS	GOBP_REGULATION_OF_RESPONSE_TO_OXIDATIVE_STRESS		66	0.32584	1.16914	0.198718	0.782527	1	463	tags=8%, list=4%, signal=8%
GSE22935_UNSTIM_VS_12H_MBOVIS_BCG_STIM_MACROPHAGE_DN	GSE22935_UNSTIM_VS_12H_MBOVIS_BCG_STIM_MACROPHAGE_DN		169	0.275963	1.16896	0.113402	0.782119	1	3263	tags=35%, list=28%, signal=48%
HP_CEREBRAL_EDEMA	HP_CEREBRAL_EDEMA		21	0.42327	1.16719	0.249428	0.788566	1	1817	tags=24%, list=15%, signal=28%
GSE17721_PAM3CSK4_VS_CPG_0.5H_BMDC_DN	GSE17721_PAM3CSK4_VS_CPG_0.5H_BMDC_DN		142	0.288665	1.16692	0.131915	0.788462	1	1545	tags=23%, list=13%, signal=26%
GOBP_REGULATION_OF_LIPID_STORAGE	GOBP_REGULATION_OF_LIPID_STORAGE		42	0.356517	1.16685	0.217984	0.787592	1	295	tags=10%, list=2%, signal=10%
GOBP_MICROTUBULE_BASED_TRANSPORT	GOBP_MICROTUBULE_BASED_TRANSPORT		146	0.286472	1.1664	0.126697	0.788304	1	1516	tags=26%, list=13%, signal=29%
GSE4142_NAIVE_VS_MEMORY_BCELL_DN	GSE4142_NAIVE_VS_MEMORY_BCELL_DN		112	0.29986	1.16626	0.171429	0.787692	1	1680	tags=25%, list=14%, signal=29%
HP_INCREASED_SERUM_LACTATE	HP_INCREASED_SERUM_LACTATE		148	0.28462	1.16554	0.117904	0.789526	1	3111	tags=30%, list=26%, signal=40%
GSE19941_UNSTIM_VS_LPS_AND_IL10_STIM_IL10_KO_MACROPHAGE_DN	GSE19941_UNSTIM_VS_LPS_AND_IL10_STIM_IL10_KO_MACROPHAGE_DN		164	0.284832	1.16552	0.133333	0.788378	1	2263	tags=29%, list=19%, signal=35%
GSE15330_HSC_VS_MEGAKARYOCYTE_ERYTHROID_PROGENITOR_DN	GSE15330_HSC_VS_MEGAKARYOCYTE_ERYTHROID_PROGENITOR_DN		141	0.291542	1.1655	0.112676	0.7873	1	2236	tags=28%, list=19%, signal=35%
GOMF_UBIQUITIN_LIKE_PROTEIN_CONJUGATING_ENZYME_BINDING	GOMF_UBIQUITIN_LIKE_PROTEIN_CONJUGATING_ENZYME_BINDING		31	0.376517	1.16429	0.216802	0.791444	1	3919	tags=61%, list=33%, signal=91%
GOBP_POSITIVE_REGULATION_OF_EPIDERMIS_DEVELOPMENT	GOBP_POSITIVE_REGULATION_OF_EPIDERMIS_DEVELOPMENT		23	0.412229	1.16419	0.260143	0.790694	1	291	tags=13%, list=2%, signal=13%
GSE14000_TRANSLATED_RNA_VS_MRNA_16H_LPS_DC_DN	GSE14000_TRANSLATED_RNA_VS_MRNA_16H_LPS_DC_DN		117	0.297826	1.16395	0.151751	0.790654	1	2680	tags=37%, list=23%, signal=47%
GSE20198_IL12_VS_IFNA_TREATED_ACT_CD4_TCELL_UP	GSE20198_IL12_VS_IFNA_TREATED_ACT_CD4_TCELL_UP		159	0.287842	1.16379	0.135135	0.790134	1	2507	tags=29%, list=21%, signal=36%
GSE14769_40MIN_VS_360MIN_LPS_BMDM_UP	GSE14769_40MIN_VS_360MIN_LPS_BMDM_UP		172	0.283228	1.16339	0.132653	0.790589	1	2610	tags=30%, list=22%, signal=38%
GOBP_TRNA_WOBBLE_BASE_MODIFICATION	GOBP_TRNA_WOBBLE_BASE_MODIFICATION		18	0.427153	1.1628	0.279012	0.791908	1	4447	tags=50%, list=38%, signal=80%
GOBP_REGULATION_OF_DOUBLE_STRAND_BREAK_REPAIR	GOBP_REGULATION_OF_DOUBLE_STRAND_BREAK_REPAIR		71	0.325124	1.16251	0.215054	0.791965	1	2529	tags=28%, list=21%, signal=36%
GSE22886_IL2_VS_IL15_STIM_NKCELL_DN	GSE22886_IL2_VS_IL15_STIM_NKCELL_DN		149	0.282574	1.16217	0.12766	0.792299	1	1171	tags=14%, list=10%, signal=15%
GOCC_PROTON_TRANSPORTING_V_TYPE_ATPASE_COMPLEX	GOCC_PROTON_TRANSPORTING_V_TYPE_ATPASE_COMPLEX		20	0.417682	1.16119	0.230415	0.795292	1	979	tags=15%, list=8%, signal=16%
GSE41176_UNSTIM_VS_ANTI_IGM_STIM_TAK1_KO_BCELL_6H_UP	GSE41176_UNSTIM_VS_ANTI_IGM_STIM_TAK1_KO_BCELL_6H_UP		145	0.284394	1.16112	0.126168	0.794364	1	1923	tags=22%, list=16%, signal=26%
GOMF_MONOOXYGENASE_ACTIVITY	GOMF_MONOOXYGENASE_ACTIVITY		45	0.358127	1.161	0.198347	0.79373	1	1027	tags=20%, list=9%, signal=22%
GOBP_CARDIAC_MUSCLE_CELL_MEMBRANE_REPOLARIZATION	GOBP_CARDIAC_MUSCLE_CELL_MEMBRANE_REPOLARIZATION		19	0.425955	1.16095	0.245192	0.792763	1	870	tags=26%, list=7%, signal=28%
GOMF_OXIDOREDUCTASE_ACTIVITY_ACTING_ON_PAIRED_DONORS_WITH_INCORPORATION_OR_REDUCTION_OF_MOLECULAR_OXYGEN	GOMF_OXIDOREDUCTASE_ACTIVITY_ACTING_ON_PAIRED_DONORS_WITH_INCORPORATION_OR_REDUCTION_OF_MOLECULAR_OXYGEN		97	0.308146	1.16093	0.168539	0.791668	1	1774	tags=26%, list=15%, signal=30%
GOBP_RESPONSE_TO_RETINOIC_ACID	GOBP_RESPONSE_TO_RETINOIC_ACID		67	0.329808	1.16068	0.228669	0.791557	1	698	tags=15%, list=6%, signal=16%
GOBP_NADP_METABOLIC_PROCESS	GOBP_NADP_METABOLIC_PROCESS		29	0.381184	1.16042	0.237374	0.791461	1	697	tags=10%, list=6%, signal=11%
ANDERSON_BLOOD_CN54GP140_ADJUVANTED_WITH_GLA_AF_AGE_18_45YO_6HR_UP	ANDERSON_BLOOD_CN54GP140_ADJUVANTED_WITH_GLA_AF_AGE_18_45YO_6HR_UP		28	0.396879	1.16032	0.274611	0.790734	1	2501	tags=39%, list=21%, signal=50%
HP_HYPOPLASIA_OF_THE_RADIUS	HP_HYPOPLASIA_OF_THE_RADIUS		30	0.381132	1.16017	0.210145	0.790221	1	2448	tags=37%, list=21%, signal=46%
HP_BELL_SHAPED_THORAX	HP_BELL_SHAPED_THORAX		19	0.422243	1.15995	0.265823	0.790041	1	2056	tags=26%, list=17%, signal=32%
GOBP_POSITIVE_REGULATION_OF_VIRAL_TRANSCRIPTION	GOBP_POSITIVE_REGULATION_OF_VIRAL_TRANSCRIPTION		24	0.404321	1.15945	0.273159	0.79106	1	2383	tags=29%, list=20%, signal=36%
HP_ABNORMAL_BLOOD_PHOSPHATE_CONCENTRATION	HP_ABNORMAL_BLOOD_PHOSPHATE_CONCENTRATION		41	0.351687	1.15928	0.219512	0.790617	1	1197	tags=22%, list=10%, signal=24%
GOMF_P53_BINDING	GOMF_P53_BINDING		53	0.339204	1.1578	0.229885	0.79588	1	2801	tags=32%, list=24%, signal=42%
GOBP_PYRIMIDINE_CONTAINING_COMPOUND_METABOLIC_PROCESS	GOBP_PYRIMIDINE_CONTAINING_COMPOUND_METABOLIC_PROCESS		57	0.332218	1.15738	0.189602	0.796564	1	3236	tags=37%, list=27%, signal=50%
GOMF_ATPASE_BINDING	GOMF_ATPASE_BINDING		65	0.324187	1.15693	0.207006	0.797368	1	1382	tags=14%, list=12%, signal=16%
GSE26351_UNSTIM_VS_BMP_PATHWAY_STIM_HEMATOPOIETIC_PROGENITORS_DN	GSE26351_UNSTIM_VS_BMP_PATHWAY_STIM_HEMATOPOIETIC_PROGENITORS_DN		133	0.291081	1.15644	0.154867	0.79823	1	1039	tags=17%, list=9%, signal=19%
HP_RENAL_AGENESIS	HP_RENAL_AGENESIS		121	0.288227	1.15518	0.140625	0.80247	1	2506	tags=31%, list=21%, signal=38%
HP_ABNORMALITY_OF_THE_SCROTUM	HP_ABNORMALITY_OF_THE_SCROTUM		93	0.303276	1.15512	0.167286	0.801597	1	1701	tags=17%, list=14%, signal=20%
GSE16385_MONOCYTE_VS_12H_ROSIGLITAZONE_TREATED_MACROPHAGE_UP	GSE16385_MONOCYTE_VS_12H_ROSIGLITAZONE_TREATED_MACROPHAGE_UP		133	0.285094	1.15501	0.156118	0.800852	1	1860	tags=23%, list=16%, signal=27%
HP_MULTIPLE_CAFE_AU_LAIT_SPOTS	HP_MULTIPLE_CAFE_AU_LAIT_SPOTS		55	0.33773	1.15498	0.200608	0.799854	1	3942	tags=47%, list=33%, signal=71%
GSE27786_BCELL_VS_MONO_MAC_UP	GSE27786_BCELL_VS_MONO_MAC_UP		160	0.280984	1.15489	0.141553	0.799064	1	2668	tags=29%, list=23%, signal=37%
HP_MACROGLOSSIA	HP_MACROGLOSSIA		89	0.307724	1.15454	0.189711	0.799454	1	2826	tags=30%, list=24%, signal=40%
GOBP_NEGATIVE_REGULATION_OF_NIK_NF_KAPPAB_SIGNALING	GOBP_NEGATIVE_REGULATION_OF_NIK_NF_KAPPAB_SIGNALING		16	0.425495	1.15427	0.271889	0.799472	1	1	tags=6%, list=0%, signal=6%
GSE16385_UNTREATED_VS_12H_ROSIGLITAZONE_IL4_TREATED_MACROPHAGE_DN	GSE16385_UNTREATED_VS_12H_ROSIGLITAZONE_IL4_TREATED_MACROPHAGE_DN		144	0.282313	1.15288	0.156682	0.804403	1	2262	tags=29%, list=19%, signal=36%
GOCC_PERICENTRIOLAR_MATERIAL	GOCC_PERICENTRIOLAR_MATERIAL		17	0.423955	1.15243	0.281863	0.80516	1	4452	tags=65%, list=38%, signal=104%
GOCC_HISTONE_DEACETYLASE_COMPLEX	GOCC_HISTONE_DEACETYLASE_COMPLEX		68	0.319603	1.15224	0.199396	0.804739	1	2735	tags=25%, list=23%, signal=32%
HP_DEPRESSED_NASAL_RIDGE	HP_DEPRESSED_NASAL_RIDGE		83	0.309356	1.15193	0.194139	0.80495	1	1474	tags=17%, list=12%, signal=19%
HP_CEREBRAL_HYPOPLASIA	HP_CEREBRAL_HYPOPLASIA		42	0.3481	1.15146	0.232836	0.80589	1	4012	tags=45%, list=34%, signal=68%
GSE31082_DN_VS_CD8_SP_THYMOCYTE_UP	GSE31082_DN_VS_CD8_SP_THYMOCYTE_UP		172	0.277095	1.15097	0.144385	0.806862	1	3613	tags=39%, list=31%, signal=55%
HP_TRUNCUS_ARTERIOSUS	HP_TRUNCUS_ARTERIOSUS		18	0.427538	1.15045	0.277136	0.807963	1	27	tags=6%, list=0%, signal=6%
GOBP_HISTONE_H2A_ACETYLATION	GOBP_HISTONE_H2A_ACETYLATION		16	0.448569	1.15025	0.281795	0.807681	1	4305	tags=56%, list=36%, signal=88%
GOBP_ELECTRON_TRANSPORT_CHAIN	GOBP_ELECTRON_TRANSPORT_CHAIN		129	0.28412	1.1494	0.146119	0.810282	1	2243	tags=26%, list=19%, signal=32%
GOBP_TELOMERE_ORGANIZATION	GOBP_TELOMERE_ORGANIZATION		123	0.292329	1.14861	0.149798	0.812577	1	4036	tags=41%, list=34%, signal=62%
GSE37301_HEMATOPOIETIC_STEM_CELL_VS_PRO_BCELL_DN	GSE37301_HEMATOPOIETIC_STEM_CELL_VS_PRO_BCELL_DN		131	0.289755	1.14836	0.168889	0.812527	1	2292	tags=29%, list=19%, signal=36%
HP_LEUKODYSTROPHY	HP_LEUKODYSTROPHY		85	0.310349	1.14701	0.223022	0.817345	1	2512	tags=33%, list=21%, signal=42%
GSE25085_FETAL_LIVER_VS_ADULT_BM_SP4_THYMIC_IMPLANT_DN	GSE25085_FETAL_LIVER_VS_ADULT_BM_SP4_THYMIC_IMPLANT_DN		175	0.273729	1.14651	0.121693	0.818466	1	2614	tags=27%, list=22%, signal=34%
HP_BIPARIETAL_NARROWING	HP_BIPARIETAL_NARROWING		53	0.328687	1.14624	0.202216	0.818473	1	2872	tags=32%, list=24%, signal=42%
GSE28737_FOLLICULAR_VS_MARGINAL_ZONE_BCELL_UP	GSE28737_FOLLICULAR_VS_MARGINAL_ZONE_BCELL_UP		158	0.279981	1.14603	0.157407	0.818224	1	3255	tags=34%, list=28%, signal=47%
KEGG_PPAR_SIGNALING_PATHWAY	KEGG_PPAR_SIGNALING_PATHWAY		49	0.344909	1.1459	0.226006	0.817651	1	576	tags=16%, list=5%, signal=17%
HP_DEVIATION_OF_THE_THUMB	HP_DEVIATION_OF_THE_THUMB		32	0.363378	1.14574	0.252055	0.817207	1	1599	tags=19%, list=14%, signal=22%
HP_DECREASED_FERTILITY_IN_FEMALES	HP_DECREASED_FERTILITY_IN_FEMALES		39	0.356274	1.14557	0.267241	0.816756	1	662	tags=18%, list=6%, signal=19%
HP_ABNORMALITY_OF_CORNEAL_THICKNESS	HP_ABNORMALITY_OF_CORNEAL_THICKNESS		66	0.320278	1.14543	0.22408	0.81617	1	2098	tags=29%, list=18%, signal=35%
HP_ABSENCE_OF_PUBERTAL_DEVELOPMENT	HP_ABSENCE_OF_PUBERTAL_DEVELOPMENT		15	0.435337	1.14492	0.268116	0.817331	1	603	tags=20%, list=5%, signal=21%
HP_COARCTATION_OF_AORTA	HP_COARCTATION_OF_AORTA		80	0.309732	1.14481	0.2	0.816703	1	2973	tags=35%, list=25%, signal=46%
GOBP_EMBRYONIC_SKELETAL_SYSTEM_DEVELOPMENT	GOBP_EMBRYONIC_SKELETAL_SYSTEM_DEVELOPMENT		79	0.315667	1.14475	0.211073	0.815809	1	1133	tags=18%, list=10%, signal=19%
HP_LEFT_VENTRICULAR_SYSTOLIC_DYSFUNCTION	HP_LEFT_VENTRICULAR_SYSTOLIC_DYSFUNCTION		15	0.442863	1.1443	0.298578	0.816608	1	2875	tags=47%, list=24%, signal=62%
GSE10239_KLRG1INT_VS_KLRG1HIGH_EFF_CD8_TCELL_UP	GSE10239_KLRG1INT_VS_KLRG1HIGH_EFF_CD8_TCELL_UP		142	0.285374	1.14353	0.1841	0.818852	1	2439	tags=29%, list=21%, signal=36%
GSE18893_CTRL_VS_TNF_TREATED_TCONV_2H_DN	GSE18893_CTRL_VS_TNF_TREATED_TCONV_2H_DN		175	0.276952	1.14298	0.143646	0.820113	1	3827	tags=43%, list=32%, signal=62%
HP_TRUNCAL_OBESITY	HP_TRUNCAL_OBESITY		40	0.352434	1.14189	0.283668	0.823786	1	455	tags=8%, list=4%, signal=8%
HP_SKELETAL_MUSCLE_HYPERTROPHY	HP_SKELETAL_MUSCLE_HYPERTROPHY		124	0.288278	1.14186	0.191057	0.822748	1	2826	tags=27%, list=24%, signal=35%
GSE3982_NEUTROPHIL_VS_TH1_DN	GSE3982_NEUTROPHIL_VS_TH1_DN		171	0.271167	1.14161	0.147059	0.822669	1	2452	tags=25%, list=21%, signal=31%
GSE26495_NAIVE_VS_PD1HIGH_CD8_TCELL_UP	GSE26495_NAIVE_VS_PD1HIGH_CD8_TCELL_UP		125	0.292401	1.14146	0.180672	0.822122	1	1604	tags=23%, list=14%, signal=27%
GSE11057_NAIVE_VS_MEMORY_CD4_TCELL_UP	GSE11057_NAIVE_VS_MEMORY_CD4_TCELL_UP		136	0.286653	1.14129	0.16	0.821766	1	1727	tags=19%, list=15%, signal=22%
HP_YELLOW_WHITE_LESIONS_OF_THE_RETINA	HP_YELLOW_WHITE_LESIONS_OF_THE_RETINA		22	0.409556	1.14055	0.284211	0.823921	1	455	tags=18%, list=4%, signal=19%
HP_CUTANEOUS_FINGER_SYNDACTYLY	HP_CUTANEOUS_FINGER_SYNDACTYLY		19	0.418031	1.14048	0.307494	0.823082	1	1685	tags=26%, list=14%, signal=31%
HP_ABNORMAL_TONGUE_MORPHOLOGY	HP_ABNORMAL_TONGUE_MORPHOLOGY		198	0.271429	1.13974	0.12426	0.825217	1	2849	tags=29%, list=24%, signal=37%
GOBP_GLUCOSE_METABOLIC_PROCESS	GOBP_GLUCOSE_METABOLIC_PROCESS		158	0.277649	1.13871	0.148148	0.828632	1	450	tags=7%, list=4%, signal=7%
GSE32034_UNTREATED_VS_ROSIGLIZATONE_TREATED_LY6C_HIGH_MONOCYTE_DN	GSE32034_UNTREATED_VS_ROSIGLIZATONE_TREATED_LY6C_HIGH_MONOCYTE_DN		149	0.278342	1.13871	0.150442	0.82749	1	2747	tags=36%, list=23%, signal=47%
GOBP_SENSORY_PERCEPTION_OF_LIGHT_STIMULUS	GOBP_SENSORY_PERCEPTION_OF_LIGHT_STIMULUS		92	0.300203	1.13799	0.166667	0.829507	1	1020	tags=16%, list=9%, signal=18%
GOBP_ERROR_FREE_TRANSLESION_SYNTHESIS	GOBP_ERROR_FREE_TRANSLESION_SYNTHESIS		19	0.413946	1.13771	0.286822	0.829621	1	833	tags=16%, list=7%, signal=17%
HP_WADDLING_GAIT	HP_WADDLING_GAIT		76	0.31215	1.13654	0.221865	0.833739	1	1633	tags=17%, list=14%, signal=20%
GSE3720_UNSTIM_VS_PMA_STIM_VD2_GAMMADELTA_TCELL_UP	GSE3720_UNSTIM_VS_PMA_STIM_VD2_GAMMADELTA_TCELL_UP		139	0.283003	1.13561	0.174274	0.836855	1	2369	tags=32%, list=20%, signal=40%
HP_ABNORMALITY_OF_THE_HAIRLINE	HP_ABNORMALITY_OF_THE_HAIRLINE		168	0.278104	1.13554	0.159624	0.836027	1	2193	tags=22%, list=19%, signal=27%
GOBP_REGULATION_OF_SUBSTRATE_ADHESION_DEPENDENT_CELL_SPREADING	GOBP_REGULATION_OF_SUBSTRATE_ADHESION_DEPENDENT_CELL_SPREADING		48	0.334263	1.13546	0.242515	0.835192	1	1611	tags=23%, list=14%, signal=26%
GOBP_LEUKOCYTE_TETHERING_OR_ROLLING	GOBP_LEUKOCYTE_TETHERING_OR_ROLLING		22	0.407485	1.13537	0.2891	0.834504	1	801	tags=23%, list=7%, signal=24%
GOBP_ATP_DEPENDENT_CHROMATIN_REMODELING	GOBP_ATP_DEPENDENT_CHROMATIN_REMODELING		56	0.329839	1.13504	0.249231	0.834782	1	4472	tags=50%, list=38%, signal=80%
HP_SPINAL_CANAL_STENOSIS	HP_SPINAL_CANAL_STENOSIS		23	0.398286	1.13497	0.276699	0.833994	1	514	tags=17%, list=4%, signal=18%
GOBP_NEURON_CELLULAR_HOMEOSTASIS	GOBP_NEURON_CELLULAR_HOMEOSTASIS		19	0.420477	1.13485	0.311856	0.833406	1	341	tags=21%, list=3%, signal=22%
HP_VERTEBRAL_CLEFTING	HP_VERTEBRAL_CLEFTING		22	0.407599	1.13457	0.293814	0.833474	1	813	tags=14%, list=7%, signal=15%
GSE10147_IL3_VS_IL3_AND_HIVP17_STIM_PDC_DN	GSE10147_IL3_VS_IL3_AND_HIVP17_STIM_PDC_DN		75	0.31216	1.13456	0.21831	0.83238	1	1468	tags=20%, list=12%, signal=23%
HP_MULTICYSTIC_KIDNEY_DYSPLASIA	HP_MULTICYSTIC_KIDNEY_DYSPLASIA		83	0.307083	1.13436	0.232975	0.832094	1	3024	tags=35%, list=26%, signal=47%
GOBP_POSITIVE_REGULATION_OF_DNA_REPAIR	GOBP_POSITIVE_REGULATION_OF_DNA_REPAIR		59	0.327039	1.13376	0.233227	0.833612	1	1892	tags=25%, list=16%, signal=30%
GSE18791_CTRL_VS_NEWCASTLE_VIRUS_DC_12H_UP	GSE18791_CTRL_VS_NEWCASTLE_VIRUS_DC_12H_UP		170	0.276327	1.1329	0.162011	0.836296	1	2390	tags=26%, list=20%, signal=32%
GOBP_EXCRETION	GOBP_EXCRETION		30	0.374128	1.13288	0.272727	0.835265	1	1350	tags=23%, list=11%, signal=26%
GOBP_REGULATION_OF_PEPTIDE_HORMONE_SECRETION	GOBP_REGULATION_OF_PEPTIDE_HORMONE_SECRETION		121	0.285585	1.13283	0.196653	0.834323	1	878	tags=15%, list=7%, signal=16%
GOMF_PROTEIN_METHYLTRANSFERASE_ACTIVITY	GOMF_PROTEIN_METHYLTRANSFERASE_ACTIVITY		66	0.321941	1.13274	0.234177	0.833596	1	3660	tags=38%, list=31%, signal=55%
GSE3982_NEUTROPHIL_VS_BASOPHIL_DN	GSE3982_NEUTROPHIL_VS_BASOPHIL_DN		172	0.274765	1.13247	0.180412	0.833667	1	2980	tags=31%, list=25%, signal=41%
GOBP_MICROTUBULE_BASED_MOVEMENT	GOBP_MICROTUBULE_BASED_MOVEMENT		230	0.263771	1.13219	0.12987	0.83378	1	1516	tags=22%, list=13%, signal=25%
GSE22886_NAIVE_BCELL_VS_MONOCYTE_UP	GSE22886_NAIVE_BCELL_VS_MONOCYTE_UP		141	0.275129	1.1313	0.180617	0.836707	1	663	tags=14%, list=6%, signal=15%
GOBP_CELLULAR_METABOLIC_COMPOUND_SALVAGE	GOBP_CELLULAR_METABOLIC_COMPOUND_SALVAGE		22	0.393667	1.13058	0.29602	0.838829	1	2783	tags=45%, list=24%, signal=59%
GSE14769_UNSTIM_VS_240MIN_LPS_BMDM_UP	GSE14769_UNSTIM_VS_240MIN_LPS_BMDM_UP		173	0.2745	1.1304	0.181818	0.838482	1	3144	tags=35%, list=27%, signal=47%
GSE27786_CD8_TCELL_VS_ERYTHROBLAST_UP	GSE27786_CD8_TCELL_VS_ERYTHROBLAST_UP		166	0.273394	1.13003	0.178571	0.83894	1	2293	tags=20%, list=19%, signal=25%
GSE15930_NAIVE_VS_48H_IN_VITRO_STIM_IFNAB_CD8_TCELL_DN	GSE15930_NAIVE_VS_48H_IN_VITRO_STIM_IFNAB_CD8_TCELL_DN		181	0.268911	1.12991	0.119171	0.838378	1	3743	tags=41%, list=32%, signal=59%
GOBP_NUCLEOTIDE_EXCISION_REPAIR_PREINCISION_COMPLEX_STABILIZATION	GOBP_NUCLEOTIDE_EXCISION_REPAIR_PREINCISION_COMPLEX_STABILIZATION		18	0.411695	1.12984	0.301587	0.837633	1	3189	tags=39%, list=27%, signal=53%
GSE37533_PPARG1_FOXP3_VS_PPARG2_FOXP3_TRANSDUCED_CD4_TCELL_DN	GSE37533_PPARG1_FOXP3_VS_PPARG2_FOXP3_TRANSDUCED_CD4_TCELL_DN		174	0.270399	1.12969	0.156977	0.837151	1	2559	tags=28%, list=22%, signal=35%
GSE18804_SPLEEN_MACROPHAGE_VS_TUMORAL_MACROPHAGE_DN	GSE18804_SPLEEN_MACROPHAGE_VS_TUMORAL_MACROPHAGE_DN		154	0.274075	1.12953	0.17757	0.836765	1	1911	tags=26%, list=16%, signal=31%
GSE37533_PPARG2_FOXP3_VS_FOXP3_TRANSDUCED_CD4_TCELL_PIOGLITAZONE_TREATED_UP	GSE37533_PPARG2_FOXP3_VS_FOXP3_TRANSDUCED_CD4_TCELL_PIOGLITAZONE_TREATED_UP		119	0.289977	1.12928	0.2	0.836815	1	1548	tags=19%, list=13%, signal=22%
ANDERSON_BLOOD_CN54GP140_ADJUVANTED_WITH_GLA_AF_AGE_18_45YO_3DY_UP	ANDERSON_BLOOD_CN54GP140_ADJUVANTED_WITH_GLA_AF_AGE_18_45YO_3DY_UP		16	0.433497	1.12919	0.290993	0.836079	1	2137	tags=31%, list=18%, signal=38%
GSE25088_CTRL_VS_ROSIGLITAZONE_STIM_MACROPHAGE_DN	GSE25088_CTRL_VS_ROSIGLITAZONE_STIM_MACROPHAGE_DN		102	0.289466	1.12779	0.20354	0.841218	1	1332	tags=18%, list=11%, signal=20%
HP_ABNORMALITY_OF_THE_TALUS	HP_ABNORMALITY_OF_THE_TALUS		40	0.353386	1.1269	0.294595	0.844203	1	2010	tags=20%, list=17%, signal=24%
GOBP_REGULATION_OF_CARBOHYDRATE_BIOSYNTHETIC_PROCESS	GOBP_REGULATION_OF_CARBOHYDRATE_BIOSYNTHETIC_PROCESS		68	0.313604	1.12418	0.245223	0.855111	1	295	tags=9%, list=2%, signal=9%
GSE24671_BAKIMULC_VS_SENDAI_VIRUS_INFECTED_MOUSE_SPLENOCYTES_UP	GSE24671_BAKIMULC_VS_SENDAI_VIRUS_INFECTED_MOUSE_SPLENOCYTES_UP		147	0.27797	1.12412	0.2	0.854258	1	1801	tags=25%, list=15%, signal=29%
GSE40441_NRP1_POS_INDUCED_TREG_VS_NRP1_NEG_NATURAL_TREG_DN	GSE40441_NRP1_POS_INDUCED_TREG_VS_NRP1_NEG_NATURAL_TREG_DN		153	0.274299	1.12326	0.161765	0.857065	1	2461	tags=29%, list=21%, signal=37%
HP_ABNORMAL_BLOOD_MONOVALENT_INORGANIC_CATION_CONCENTRATION	HP_ABNORMAL_BLOOD_MONOVALENT_INORGANIC_CATION_CONCENTRATION		70	0.307447	1.1225	0.251701	0.85936	1	908	tags=16%, list=8%, signal=17%
HP_DECREASED_ADIPOSE_TISSUE	HP_DECREASED_ADIPOSE_TISSUE		35	0.354717	1.1223	0.279373	0.859153	1	1028	tags=11%, list=9%, signal=12%
HP_THORACIC_HYPOPLASIA	HP_THORACIC_HYPOPLASIA		104	0.292322	1.12199	0.20155	0.859383	1	1805	tags=18%, list=15%, signal=21%
HP_HYPOKALEMIA	HP_HYPOKALEMIA		36	0.352328	1.12151	0.269022	0.860424	1	908	tags=17%, list=8%, signal=18%
GSE20366_EX_VIVO_VS_HOMEOSTATIC_CONVERSION_TREG_DN	GSE20366_EX_VIVO_VS_HOMEOSTATIC_CONVERSION_TREG_DN		150	0.271615	1.12072	0.183099	0.862805	1	3066	tags=31%, list=26%, signal=42%
HP_GLOSSOPTOSIS	HP_GLOSSOPTOSIS		19	0.411611	1.12047	0.319307	0.862843	1	1033	tags=26%, list=9%, signal=29%
GSE18791_CTRL_VS_NEWCASTLE_VIRUS_DC_4H_UP	GSE18791_CTRL_VS_NEWCASTLE_VIRUS_DC_4H_UP		155	0.273527	1.12003	0.174312	0.863723	1	3622	tags=38%, list=31%, signal=54%
KEGG_VIBRIO_CHOLERAE_INFECTION	KEGG_VIBRIO_CHOLERAE_INFECTION		40	0.342737	1.12	0.284884	0.862718	1	201	tags=5%, list=2%, signal=5%
GOBP_REGULATION_OF_LIPOPROTEIN_LIPASE_ACTIVITY	GOBP_REGULATION_OF_LIPOPROTEIN_LIPASE_ACTIVITY		15	0.435618	1.11935	0.339109	0.864657	1	1351	tags=27%, list=11%, signal=30%
HP_ABNORMAL_TRACHEA_MORPHOLOGY	HP_ABNORMAL_TRACHEA_MORPHOLOGY		108	0.29156	1.11883	0.222222	0.86599	1	2023	tags=26%, list=17%, signal=31%
GOBP_DNA_DEPENDENT_DNA_REPLICATION	GOBP_DNA_DEPENDENT_DNA_REPLICATION		135	0.277387	1.11867	0.207965	0.865556	1	3970	tags=43%, list=34%, signal=64%
GOBP_MITOTIC_RECOMBINATION	GOBP_MITOTIC_RECOMBINATION		17	0.428424	1.11858	0.331695	0.86481	1	1962	tags=29%, list=17%, signal=35%
HP_CYTOCHROME_C_OXIDASE_NEGATIVE_MUSCLE_FIBERS	HP_CYTOCHROME_C_OXIDASE_NEGATIVE_MUSCLE_FIBERS		16	0.432271	1.1181	0.305825	0.865783	1	2861	tags=44%, list=24%, signal=58%
HP_ABNORMALITY_OF_DNA_REPAIR	HP_ABNORMALITY_OF_DNA_REPAIR		15	0.426542	1.11807	0.319728	0.864844	1	3189	tags=47%, list=27%, signal=64%
HP_DECREASED_ACTIVITY_OF_THE_PYRUVATE_DEHYDROGENASE_COMPLEX	HP_DECREASED_ACTIVITY_OF_THE_PYRUVATE_DEHYDROGENASE_COMPLEX		30	0.368743	1.11784	0.297297	0.864705	1	2307	tags=30%, list=20%, signal=37%
GSE2770_IL12_AND_TGFB_VS_IL4_TREATED_ACT_CD4_TCELL_2H_DN	GSE2770_IL12_AND_TGFB_VS_IL4_TREATED_ACT_CD4_TCELL_2H_DN		169	0.267863	1.1169	0.211268	0.86794	1	3814	tags=40%, list=32%, signal=59%
HP_FUNCTIONAL_ABNORMALITY_OF_MALE_INTERNAL_GENITALIA	HP_FUNCTIONAL_ABNORMALITY_OF_MALE_INTERNAL_GENITALIA		120	0.286186	1.1168	0.212963	0.867241	1	990	tags=15%, list=8%, signal=16%
GOCC_NUCLEAR_CHROMOSOME	GOCC_NUCLEAR_CHROMOSOME		178	0.26877	1.11666	0.201005	0.866741	1	2841	tags=29%, list=24%, signal=38%
GSE3720_UNSTIM_VS_LPS_STIM_VD2_GAMMADELTA_TCELL_UP	GSE3720_UNSTIM_VS_LPS_STIM_VD2_GAMMADELTA_TCELL_UP		117	0.285741	1.11585	0.22449	0.869323	1	2012	tags=30%, list=17%, signal=36%
GSE12845_IGD_POS_BLOOD_VS_DARKZONE_GC_TONSIL_BCELL_DN	GSE12845_IGD_POS_BLOOD_VS_DARKZONE_GC_TONSIL_BCELL_DN		168	0.271588	1.11554	0.225962	0.869605	1	2283	tags=24%, list=19%, signal=29%
HP_FOCAL_T2_HYPERINTENSE_BASAL_GANGLIA_LESION	HP_FOCAL_T2_HYPERINTENSE_BASAL_GANGLIA_LESION		37	0.34748	1.11547	0.295393	0.868848	1	2307	tags=27%, list=20%, signal=33%
GOMF_EXONUCLEASE_ACTIVITY	GOMF_EXONUCLEASE_ACTIVITY		77	0.308077	1.11523	0.259259	0.868857	1	3931	tags=43%, list=33%, signal=64%
GOMF_RNA_POLYMERASE_II_TRANSCRIPTION_FACTOR_BINDING	GOMF_RNA_POLYMERASE_II_TRANSCRIPTION_FACTOR_BINDING		34	0.346636	1.11483	0.297376	0.869534	1	101	tags=6%, list=1%, signal=6%
GOCC_CILIARY_BASE	GOCC_CILIARY_BASE		25	0.376594	1.11464	0.305489	0.869216	1	2830	tags=44%, list=24%, signal=58%
GSE34217_MIR17_92_OVEREXPRESS_VS_WT_ACT_CD8_TCELL_DN	GSE34217_MIR17_92_OVEREXPRESS_VS_WT_ACT_CD8_TCELL_DN		98	0.292179	1.11427	0.213523	0.869819	1	1658	tags=21%, list=14%, signal=25%
HP_ABNORMALITY_OF_RETINAL_PIGMENTATION	HP_ABNORMALITY_OF_RETINAL_PIGMENTATION		219	0.26458	1.11416	0.177143	0.869212	1	3226	tags=31%, list=27%, signal=42%
HP_ABNORMALITY_OF_THE_MITOCHONDRION	HP_ABNORMALITY_OF_THE_MITOCHONDRION		139	0.276607	1.11383	0.2	0.869606	1	4091	tags=41%, list=35%, signal=62%
GOBP_EXIT_FROM_MITOSIS	GOBP_EXIT_FROM_MITOSIS		24	0.39592	1.11323	0.300493	0.871267	1	1756	tags=25%, list=15%, signal=29%
HP_HYPOPLASIA_OF_THE_ODONTOID_PROCESS	HP_HYPOPLASIA_OF_THE_ODONTOID_PROCESS		24	0.385677	1.11298	0.266839	0.871279	1	2186	tags=33%, list=19%, signal=41%
GSE21063_3H_VS_16H_ANTI_IGM_STIM_BCELL_DN	GSE21063_3H_VS_16H_ANTI_IGM_STIM_BCELL_DN		165	0.271755	1.1124	0.179724	0.872749	1	2803	tags=34%, list=24%, signal=44%
GSE9960_HEALTHY_VS_GRAM_POS_SEPSIS_PBMC_UP	GSE9960_HEALTHY_VS_GRAM_POS_SEPSIS_PBMC_UP		142	0.276701	1.11174	0.206422	0.874544	1	2345	tags=27%, list=20%, signal=34%
HP_ULNAR_DEVIATION_OF_THE_HAND_OR_OF_FINGERS_OF_THE_HAND	HP_ULNAR_DEVIATION_OF_THE_HAND_OR_OF_FINGERS_OF_THE_HAND		31	0.360661	1.11143	0.302872	0.87494	1	31	tags=6%, list=0%, signal=6%
HP_HAMARTOMA_OF_TONGUE	HP_HAMARTOMA_OF_TONGUE		17	0.425752	1.11072	0.31592	0.877108	1	3437	tags=47%, list=29%, signal=66%
HP_APLASIA_HYPOPLASIA_OF_THE_SPLEEN	HP_APLASIA_HYPOPLASIA_OF_THE_SPLEEN		45	0.339846	1.1105	0.278287	0.877032	1	1779	tags=33%, list=15%, signal=39%
HP_INSULIN_RESISTANCE	HP_INSULIN_RESISTANCE		51	0.326029	1.11026	0.292398	0.877032	1	455	tags=14%, list=4%, signal=14%
GOCC_CYTOPLASMIC_DYNEIN_COMPLEX	GOCC_CYTOPLASMIC_DYNEIN_COMPLEX		16	0.42923	1.11002	0.336683	0.877067	1	2313	tags=38%, list=20%, signal=47%
GOBP_REGULATION_OF_DOUBLE_STRAND_BREAK_REPAIR_VIA_HOMOLOGOUS_RECOMBINATION	GOBP_REGULATION_OF_DOUBLE_STRAND_BREAK_REPAIR_VIA_HOMOLOGOUS_RECOMBINATION		43	0.340425	1.10993	0.295858	0.876335	1	2498	tags=28%, list=21%, signal=35%
GOMF_PEPTIDE_LYSINE_N_ACETYLTRANSFERASE_ACTIVITY	GOMF_PEPTIDE_LYSINE_N_ACETYLTRANSFERASE_ACTIVITY		36	0.354688	1.10971	0.304233	0.876304	1	5146	tags=61%, list=44%, signal=108%
GOMF_BASAL_TRANSCRIPTION_MACHINERY_BINDING	GOMF_BASAL_TRANSCRIPTION_MACHINERY_BINDING		50	0.330355	1.10964	0.276968	0.875515	1	4394	tags=50%, list=37%, signal=79%
HP_CHORIORETINAL_DYSPLASIA	HP_CHORIORETINAL_DYSPLASIA		20	0.406049	1.10849	0.321101	0.879664	1	277	tags=10%, list=2%, signal=10%
HP_TRACHEAL_STENOSIS	HP_TRACHEAL_STENOSIS		22	0.388344	1.10787	0.324397	0.881421	1	659	tags=18%, list=6%, signal=19%
GOMF_UBIQUITIN_SPECIFIC_PROTEASE_BINDING	GOMF_UBIQUITIN_SPECIFIC_PROTEASE_BINDING		18	0.417121	1.1072	0.317734	0.883448	1	917	tags=17%, list=8%, signal=18%
GOBP_CELLULAR_RESPONSE_TO_CALCIUM_ION	GOBP_CELLULAR_RESPONSE_TO_CALCIUM_ION		51	0.327921	1.10683	0.290419	0.883956	1	2034	tags=27%, list=17%, signal=33%
GSE17721_PAM3CSK4_VS_CPG_12H_BMDC_UP	GSE17721_PAM3CSK4_VS_CPG_12H_BMDC_UP		151	0.273494	1.10637	0.164444	0.885052	1	2444	tags=27%, list=21%, signal=34%
GSE25087_TREG_VS_TCONV_ADULT_DN	GSE25087_TREG_VS_TCONV_ADULT_DN		136	0.279279	1.10631	0.213115	0.884192	1	1727	tags=24%, list=15%, signal=27%
HP_ABNORMAL_EYELID_PHYSIOLOGY	HP_ABNORMAL_EYELID_PHYSIOLOGY		25	0.380081	1.10579	0.312977	0.885588	1	1439	tags=28%, list=12%, signal=32%
GSE37301_MULTIPOTENT_PROGENITOR_VS_CD4_TCELL_DN	GSE37301_MULTIPOTENT_PROGENITOR_VS_CD4_TCELL_DN		164	0.264712	1.10519	0.227053	0.887274	1	2615	tags=20%, list=22%, signal=25%
HP_ABNORMALITY_OF_THE_CARPAL_BONES	HP_ABNORMALITY_OF_THE_CARPAL_BONES		59	0.318816	1.10429	0.280405	0.890329	1	1826	tags=22%, list=15%, signal=26%
GSE37532_TREG_VS_TCONV_CD4_TCELL_FROM_VISCERAL_ADIPOSE_TISSUE_DN	GSE37532_TREG_VS_TCONV_CD4_TCELL_FROM_VISCERAL_ADIPOSE_TISSUE_DN		138	0.271961	1.10428	0.222222	0.88928	1	2444	tags=27%, list=21%, signal=33%
HP_INSULIN_RESISTANT_DIABETES_MELLITUS	HP_INSULIN_RESISTANT_DIABETES_MELLITUS		24	0.378964	1.10407	0.319797	0.889134	1	455	tags=21%, list=4%, signal=22%
GOBP_REGULATION_OF_CELL_CYCLE_G2_M_PHASE_TRANSITION	GOBP_REGULATION_OF_CELL_CYCLE_G2_M_PHASE_TRANSITION		186	0.264327	1.10269	0.20202	0.89457	1	3623	tags=34%, list=31%, signal=48%
GOBP_PRIMARY_ALCOHOL_METABOLIC_PROCESS	GOBP_PRIMARY_ALCOHOL_METABOLIC_PROCESS		49	0.324779	1.10178	0.296407	0.897707	1	942	tags=20%, list=8%, signal=22%
GSE41867_NAIVE_VS_EFFECTOR_CD8_TCELL_DN	GSE41867_NAIVE_VS_EFFECTOR_CD8_TCELL_DN		170	0.26985	1.10139	0.233645	0.898436	1	2871	tags=33%, list=24%, signal=43%
GOBP_BARBED_END_ACTIN_FILAMENT_CAPPING	GOBP_BARBED_END_ACTIN_FILAMENT_CAPPING		21	0.38517	1.10103	0.311856	0.89899	1	1529	tags=29%, list=13%, signal=33%
GSE18791_UNSTIM_VS_NEWCATSLE_VIRUS_DC_10H_UP	GSE18791_UNSTIM_VS_NEWCATSLE_VIRUS_DC_10H_UP		166	0.269072	1.10077	0.231441	0.899098	1	3300	tags=33%, list=28%, signal=45%
GOBP_NEGATIVE_REGULATION_OF_FATTY_ACID_METABOLIC_PROCESS	GOBP_NEGATIVE_REGULATION_OF_FATTY_ACID_METABOLIC_PROCESS		19	0.40315	1.10024	0.347319	0.900478	1	1524	tags=32%, list=13%, signal=36%
HP_PULMONIC_STENOSIS	HP_PULMONIC_STENOSIS		85	0.290646	1.09995	0.262069	0.90078	1	1898	tags=15%, list=16%, signal=18%
GOBP_LATE_ENDOSOME_TO_VACUOLE_TRANSPORT	GOBP_LATE_ENDOSOME_TO_VACUOLE_TRANSPORT		18	0.404221	1.09983	0.321168	0.900299	1	2992	tags=39%, list=25%, signal=52%
GSE16385_MONOCYTE_VS_12H_ROSIGLITAZONE_IL4_TREATED_MACROPHAGE_UP	GSE16385_MONOCYTE_VS_12H_ROSIGLITAZONE_IL4_TREATED_MACROPHAGE_UP		147	0.267315	1.0997	0.213974	0.899812	1	3098	tags=31%, list=26%, signal=42%
HP_DISPLACEMENT_OF_THE_URETHRAL_MEATUS	HP_DISPLACEMENT_OF_THE_URETHRAL_MEATUS		246	0.255965	1.09929	0.215686	0.900673	1	2558	tags=22%, list=22%, signal=28%
HP_KETONURIA	HP_KETONURIA		16	0.420272	1.09906	0.330097	0.900665	1	866	tags=19%, list=7%, signal=20%
GOBP_PEPTIDYL_LYSINE_TRIMETHYLATION	GOBP_PEPTIDYL_LYSINE_TRIMETHYLATION		34	0.354012	1.0981	0.307087	0.904141	1	3820	tags=47%, list=32%, signal=69%
GSE41176_UNSTIM_VS_ANTI_IGM_STIM_TAK1_KO_BCELL_1H_UP	GSE41176_UNSTIM_VS_ANTI_IGM_STIM_TAK1_KO_BCELL_1H_UP		176	0.264481	1.09801	0.208333	0.903515	1	2554	tags=30%, list=22%, signal=38%
GOBP_CELL_DEATH_IN_RESPONSE_TO_OXIDATIVE_STRESS	GOBP_CELL_DEATH_IN_RESPONSE_TO_OXIDATIVE_STRESS		63	0.311238	1.09733	0.247619	0.90563	1	354	tags=6%, list=3%, signal=7%
HP_BEAKING_OF_VERTEBRAL_BODIES	HP_BEAKING_OF_VERTEBRAL_BODIES		21	0.401031	1.09669	0.348039	0.907559	1	2394	tags=38%, list=20%, signal=48%
GSE17721_LPS_VS_CPG_1H_BMDC_UP	GSE17721_LPS_VS_CPG_1H_BMDC_UP		165	0.264906	1.09429	0.222222	0.917981	1	3195	tags=33%, list=27%, signal=44%
GSE21670_UNTREATED_VS_TGFB_IL6_TREATED_CD4_TCELL_DN	GSE21670_UNTREATED_VS_TGFB_IL6_TREATED_CD4_TCELL_DN		111	0.279682	1.09421	0.279661	0.91724	1	1982	tags=28%, list=17%, signal=33%
GOCC_STEREOCILIUM_BUNDLE	GOCC_STEREOCILIUM_BUNDLE		36	0.353089	1.09408	0.32133	0.91672	1	1565	tags=28%, list=13%, signal=32%
GOMF_HSP70_PROTEIN_BINDING	GOMF_HSP70_PROTEIN_BINDING		28	0.362788	1.09393	0.297158	0.916367	1	1923	tags=25%, list=16%, signal=30%
GOBP_PROTEIN_LOCALIZATION_TO_MICROTUBULE_ORGANIZING_CENTER	GOBP_PROTEIN_LOCALIZATION_TO_MICROTUBULE_ORGANIZING_CENTER		31	0.354155	1.09378	0.311978	0.915935	1	3623	tags=39%, list=31%, signal=56%
HP_EMG_NEUROPATHIC_CHANGES	HP_EMG_NEUROPATHIC_CHANGES		34	0.348628	1.09293	0.306358	0.918887	1	1145	tags=18%, list=10%, signal=19%
HP_LOW_LEVELS_OF_VITAMIN_D	HP_LOW_LEVELS_OF_VITAMIN_D		17	0.414282	1.0929	0.351759	0.9179	1	376	tags=18%, list=3%, signal=18%
HP_METATARSUS_VALGUS	HP_METATARSUS_VALGUS		19	0.399364	1.09286	0.303614	0.916982	1	277	tags=11%, list=2%, signal=11%
GSE11057_NAIVE_VS_CENT_MEMORY_CD4_TCELL_UP	GSE11057_NAIVE_VS_CENT_MEMORY_CD4_TCELL_UP		123	0.279947	1.09263	0.268595	0.916954	1	1526	tags=17%, list=13%, signal=19%
HP_SEVERE_POSTNATAL_GROWTH_RETARDATION	HP_SEVERE_POSTNATAL_GROWTH_RETARDATION		24	0.378213	1.09232	0.303191	0.917375	1	4397	tags=58%, list=37%, signal=93%
GSE22886_IL2_VS_IL15_STIM_NKCELL_UP	GSE22886_IL2_VS_IL15_STIM_NKCELL_UP		95	0.292327	1.09203	0.269231	0.917677	1	1194	tags=17%, list=10%, signal=19%
GSE24634_NAIVE_CD4_TCELL_VS_DAY10_IL4_CONV_TREG_UP	GSE24634_NAIVE_CD4_TCELL_VS_DAY10_IL4_CONV_TREG_UP		121	0.278144	1.09177	0.222689	0.917852	1	1459	tags=20%, list=12%, signal=22%
GSE40274_CTRL_VS_FOXP3_TRANSDUCED_ACTIVATED_CD4_TCELL_UP	GSE40274_CTRL_VS_FOXP3_TRANSDUCED_ACTIVATED_CD4_TCELL_UP		163	0.263496	1.09063	0.221719	0.922143	1	2052	tags=23%, list=17%, signal=27%
GSE32901_TH1_VS_TH17_NEG_CD4_TCELL_DN	GSE32901_TH1_VS_TH17_NEG_CD4_TCELL_DN		70	0.300027	1.09018	0.271478	0.923123	1	950	tags=16%, list=8%, signal=17%
GSE22935_WT_VS_MYD88_KO_MACROPHAGE_DN	GSE22935_WT_VS_MYD88_KO_MACROPHAGE_DN		142	0.265636	1.09017	0.232068	0.922033	1	2046	tags=23%, list=17%, signal=27%
HP_NEOPLASM_OF_THE_SKELETAL_SYSTEM	HP_NEOPLASM_OF_THE_SKELETAL_SYSTEM		66	0.304365	1.08973	0.306897	0.923018	1	2395	tags=36%, list=20%, signal=45%
GOBP_DNA_REPLICATION	GOBP_DNA_REPLICATION		243	0.250743	1.08957	0.218182	0.922645	1	3569	tags=35%, list=30%, signal=50%
GSE22919_RESTING_VS_IL2_IL12_IL15_STIM_NK_CELL_DN	GSE22919_RESTING_VS_IL2_IL12_IL15_STIM_NK_CELL_DN		176	0.263217	1.08872	0.221622	0.925623	1	2001	tags=22%, list=17%, signal=26%
GOBP_RECOMBINATIONAL_REPAIR	GOBP_RECOMBINATIONAL_REPAIR		123	0.278066	1.08815	0.25	0.927203	1	2498	tags=26%, list=21%, signal=33%
GSE9946_MATURE_STIMULATORY_VS_PROSTAGLANDINE2_TREATED_MATURE_DC_DN	GSE9946_MATURE_STIMULATORY_VS_PROSTAGLANDINE2_TREATED_MATURE_DC_DN		68	0.304698	1.08806	0.29	0.926484	1	1022	tags=13%, list=9%, signal=14%
GSE35543_IN_VIVO_NTREG_VS_IN_VITRO_ITREG_UP	GSE35543_IN_VIVO_NTREG_VS_IN_VITRO_ITREG_UP		96	0.284584	1.08769	0.273723	0.927104	1	739	tags=13%, list=6%, signal=13%
HP_TREMOR_BY_ANATOMICAL_SITE	HP_TREMOR_BY_ANATOMICAL_SITE		50	0.321319	1.0873	0.309446	0.927921	1	4582	tags=62%, list=39%, signal=101%
GSE41867_NAIVE_VS_DAY8_LCMV_ARMSTRONG_EFFECTOR_CD8_TCELL_UP	GSE41867_NAIVE_VS_DAY8_LCMV_ARMSTRONG_EFFECTOR_CD8_TCELL_UP		141	0.268909	1.08694	0.243243	0.928523	1	2249	tags=27%, list=19%, signal=33%
GOBP_POSITIVE_REGULATION_OF_MITOCHONDRIAL_FISSION	GOBP_POSITIVE_REGULATION_OF_MITOCHONDRIAL_FISSION		15	0.423561	1.08653	0.359296	0.92936	1	303	tags=13%, list=3%, signal=14%
GOBP_REGULATION_OF_CELL_CYCLE_CHECKPOINT	GOBP_REGULATION_OF_CELL_CYCLE_CHECKPOINT		28	0.36575	1.08647	0.353234	0.928555	1	3055	tags=36%, list=26%, signal=48%
GOBP_CLEAVAGE_INVOLVED_IN_RRNA_PROCESSING	GOBP_CLEAVAGE_INVOLVED_IN_RRNA_PROCESSING		23	0.380796	1.08643	0.334963	0.927611	1	4006	tags=48%, list=34%, signal=72%
GSE41867_NAIVE_VS_DAY30_LCMV_ARMSTRONG_MEMORY_CD8_TCELL_UP	GSE41867_NAIVE_VS_DAY30_LCMV_ARMSTRONG_MEMORY_CD8_TCELL_UP		164	0.265931	1.08604	0.271739	0.928423	1	3026	tags=30%, list=26%, signal=40%
GSE26351_UNSTIM_VS_BMP_PATHWAY_STIM_HEMATOPOIETIC_PROGENITORS_UP	GSE26351_UNSTIM_VS_BMP_PATHWAY_STIM_HEMATOPOIETIC_PROGENITORS_UP		158	0.264597	1.08468	0.256039	0.933813	1	1893	tags=23%, list=16%, signal=28%
HP_ABNORMAL_CHOROID_MORPHOLOGY	HP_ABNORMAL_CHOROID_MORPHOLOGY		115	0.276048	1.08432	0.284553	0.934375	1	1281	tags=13%, list=11%, signal=14%
GSE14415_INDUCED_TREG_VS_FOXP3_KO_INDUCED_TREG_UP	GSE14415_INDUCED_TREG_VS_FOXP3_KO_INDUCED_TREG_UP		139	0.26863	1.08428	0.248927	0.933475	1	2170	tags=29%, list=18%, signal=36%
HP_TRANSPOSITION_OF_THE_GREAT_ARTERIES	HP_TRANSPOSITION_OF_THE_GREAT_ARTERIES		36	0.339369	1.08358	0.304348	0.935739	1	1779	tags=36%, list=15%, signal=42%
HP_ABNORMALITY_OF_THE_ODONTOID_PROCESS	HP_ABNORMALITY_OF_THE_ODONTOID_PROCESS		26	0.376389	1.08352	0.330645	0.93494	1	2186	tags=35%, list=19%, signal=42%
GSE18791_CTRL_VS_NEWCASTLE_VIRUS_DC_8H_UP	GSE18791_CTRL_VS_NEWCASTLE_VIRUS_DC_8H_UP		161	0.265528	1.08302	0.254717	0.936237	1	3622	tags=39%, list=31%, signal=55%
GSE18791_UNSTIM_VS_NEWCATSLE_VIRUS_DC_1H_DN	GSE18791_UNSTIM_VS_NEWCATSLE_VIRUS_DC_1H_DN		124	0.272122	1.08197	0.2875	0.940153	1	2794	tags=32%, list=24%, signal=42%
GSE22886_IGM_MEMORY_BCELL_VS_BLOOD_PLASMA_CELL_UP	GSE22886_IGM_MEMORY_BCELL_VS_BLOOD_PLASMA_CELL_UP		132	0.270459	1.08168	0.283262	0.940468	1	1238	tags=18%, list=10%, signal=20%
HP_LETHARGY	HP_LETHARGY		136	0.26632	1.08152	0.264151	0.940135	1	2551	tags=29%, list=22%, signal=36%
GSE12845_PRE_GC_VS_DARKZONE_GC_TONSIL_BCELL_DN	GSE12845_PRE_GC_VS_DARKZONE_GC_TONSIL_BCELL_DN		174	0.263214	1.08133	0.230769	0.939935	1	2512	tags=23%, list=21%, signal=29%
GSE1432_1H_VS_6H_IFNG_MICROGLIA_UP	GSE1432_1H_VS_6H_IFNG_MICROGLIA_UP		166	0.263916	1.08124	0.233333	0.93926	1	1664	tags=16%, list=14%, signal=19%
HP_HYPOPLASIA_OF_THE_UTERUS	HP_HYPOPLASIA_OF_THE_UTERUS		21	0.389111	1.08099	0.353247	0.939403	1	603	tags=14%, list=5%, signal=15%
GSE27786_LIN_NEG_VS_CD8_TCELL_UP	GSE27786_LIN_NEG_VS_CD8_TCELL_UP		171	0.259883	1.08084	0.255924	0.939066	1	1890	tags=16%, list=16%, signal=19%
GSE24210_TCONV_VS_TREG_UP	GSE24210_TCONV_VS_TREG_UP		143	0.263255	1.07953	0.286996	0.944469	1	786	tags=13%, list=7%, signal=14%
HP_CONE_CONE_ROD_DYSTROPHY	HP_CONE_CONE_ROD_DYSTROPHY		16	0.421984	1.07933	0.368812	0.944369	1	1556	tags=25%, list=13%, signal=29%
GOBP_DNA_CONFORMATION_CHANGE	GOBP_DNA_CONFORMATION_CHANGE		226	0.251369	1.07922	0.2125	0.943777	1	3640	tags=32%, list=31%, signal=45%
GSE22601_DOUBLE_NEGATIVE_VS_IMMATURE_CD4_SP_THYMOCYTE_UP	GSE22601_DOUBLE_NEGATIVE_VS_IMMATURE_CD4_SP_THYMOCYTE_UP		152	0.264972	1.07902	0.258687	0.943658	1	1758	tags=18%, list=15%, signal=21%
GOBP_PHAGOSOME_ACIDIFICATION	GOBP_PHAGOSOME_ACIDIFICATION		21	0.383771	1.07885	0.358056	0.94343	1	4	tags=5%, list=0%, signal=5%
HP_ROD_CONE_DYSTROPHY	HP_ROD_CONE_DYSTROPHY		136	0.267431	1.07859	0.26971	0.943629	1	3024	tags=37%, list=26%, signal=49%
GOCC_CLUSTER_OF_ACTIN_BASED_CELL_PROJECTIONS	GOCC_CLUSTER_OF_ACTIN_BASED_CELL_PROJECTIONS		94	0.28649	1.07824	0.314286	0.944214	1	1565	tags=19%, list=13%, signal=22%
GSE27786_BCELL_VS_NKCELL_UP	GSE27786_BCELL_VS_NKCELL_UP		163	0.260783	1.0779	0.282609	0.944723	1	3729	tags=38%, list=32%, signal=55%
GSE14308_TH17_VS_NATURAL_TREG_UP	GSE14308_TH17_VS_NATURAL_TREG_UP		158	0.259154	1.07764	0.252212	0.944894	1	2178	tags=27%, list=18%, signal=33%
GOBP_POSITIVE_REGULATION_OF_TRANSCRIPTION_INITIATION_FROM_RNA_POLYMERASE_II_PROMOTER	GOBP_POSITIVE_REGULATION_OF_TRANSCRIPTION_INITIATION_FROM_RNA_POLYMERASE_II_PROMOTER		25	0.372336	1.07729	0.324742	0.945527	1	699	tags=12%, list=6%, signal=13%
GSE43956_WT_VS_SGK1_KO_TH17_DIFFERENTIATED_CD4_TCELL_UP	GSE43956_WT_VS_SGK1_KO_TH17_DIFFERENTIATED_CD4_TCELL_UP		126	0.271204	1.07693	0.275304	0.946227	1	1917	tags=23%, list=16%, signal=27%
HP_SPRENGEL_ANOMALY	HP_SPRENGEL_ANOMALY		37	0.338646	1.07685	0.335065	0.94549	1	1139	tags=22%, list=10%, signal=24%
GOBP_ISOPRENOID_METABOLIC_PROCESS	GOBP_ISOPRENOID_METABOLIC_PROCESS		79	0.292428	1.07614	0.293375	0.947835	1	1379	tags=23%, list=12%, signal=26%
GOBP_REGULATION_OF_STEROID_BIOSYNTHETIC_PROCESS	GOBP_REGULATION_OF_STEROID_BIOSYNTHETIC_PROCESS		66	0.296801	1.07613	0.312715	0.946766	1	1400	tags=20%, list=12%, signal=22%
GOBP_NUCLEOTIDE_EXCISION_REPAIR_DNA_DUPLEX_UNWINDING	GOBP_NUCLEOTIDE_EXCISION_REPAIR_DNA_DUPLEX_UNWINDING		17	0.410461	1.07558	0.348259	0.948342	1	3522	tags=47%, list=30%, signal=67%
HP_ABNORMAL_FEMORAL_HEAD_MORPHOLOGY	HP_ABNORMAL_FEMORAL_HEAD_MORPHOLOGY		53	0.318892	1.07484	0.321534	0.951006	1	2010	tags=23%, list=17%, signal=27%
GSE27786_LIN_NEG_VS_MONO_MAC_UP	GSE27786_LIN_NEG_VS_MONO_MAC_UP		164	0.260124	1.07471	0.252294	0.950534	1	3777	tags=38%, list=32%, signal=56%
HP_APLASIA_HYPOPLASIA_INVOLVING_THE_VERTEBRAL_COLUMN	HP_APLASIA_HYPOPLASIA_INVOLVING_THE_VERTEBRAL_COLUMN		51	0.314354	1.07409	0.33237	0.95238	1	1866	tags=20%, list=16%, signal=23%
HP_ABNORMALITY_OF_THE_PUBIC_BONE	HP_ABNORMALITY_OF_THE_PUBIC_BONE		27	0.363091	1.07389	0.339674	0.952273	1	1829	tags=26%, list=15%, signal=31%
HP_ABNORMALITY_OF_THE_FEMALE_GENITALIA	HP_ABNORMALITY_OF_THE_FEMALE_GENITALIA		388	0.238927	1.07369	0.215686	0.952107	1	3031	tags=29%, list=26%, signal=38%
GOBP_ADULT_LOCOMOTORY_BEHAVIOR	GOBP_ADULT_LOCOMOTORY_BEHAVIOR		38	0.339829	1.07355	0.337143	0.951709	1	463	tags=11%, list=4%, signal=11%
HP_CONE_SHAPED_EPIPHYSES_OF_THE_PHALANGES_OF_THE_HAND	HP_CONE_SHAPED_EPIPHYSES_OF_THE_PHALANGES_OF_THE_HAND		22	0.37726	1.07329	0.354497	0.951897	1	1522	tags=23%, list=13%, signal=26%
GSE27786_NKCELL_VS_MONO_MAC_UP	GSE27786_NKCELL_VS_MONO_MAC_UP		170	0.256491	1.07269	0.278689	0.953618	1	2437	tags=25%, list=21%, signal=31%
GSE2770_TGFB_AND_IL4_VS_TGFB_AND_IL12_TREATED_ACT_CD4_TCELL_2H_UP	GSE2770_TGFB_AND_IL4_VS_TGFB_AND_IL12_TREATED_ACT_CD4_TCELL_2H_UP		98	0.277003	1.07222	0.286792	0.954863	1	2066	tags=26%, list=17%, signal=31%
HP_ABNORMAL_LIGHT_AND_DARK_ADAPTED_ELECTRORETINOGRAM	HP_ABNORMAL_LIGHT_AND_DARK_ADAPTED_ELECTRORETINOGRAM		17	0.404926	1.07221	0.355932	0.953833	1	423	tags=18%, list=4%, signal=18%
HP_POSTURAL_TREMOR	HP_POSTURAL_TREMOR		39	0.331618	1.07195	0.327778	0.953964	1	5	tags=3%, list=0%, signal=3%
HP_MORPHOLOGICAL_ABNORMALITY_OF_THE_MIDDLE_EAR	HP_MORPHOLOGICAL_ABNORMALITY_OF_THE_MIDDLE_EAR		16	0.415763	1.0718	0.364963	0.95359	1	515	tags=19%, list=4%, signal=20%
HP_BLEPHARITIS	HP_BLEPHARITIS		38	0.334779	1.07146	0.366492	0.95417	1	1996	tags=21%, list=17%, signal=25%
GOBP_REGULATION_OF_CENTROSOME_CYCLE	GOBP_REGULATION_OF_CENTROSOME_CYCLE		37	0.337096	1.07122	0.325926	0.954229	1	3811	tags=43%, list=32%, signal=64%
GSE34205_HEALTHY_VS_FLU_INF_INFANT_PBMC_UP	GSE34205_HEALTHY_VS_FLU_INF_INFANT_PBMC_UP		146	0.264288	1.0711	0.295	0.95377	1	1571	tags=19%, list=13%, signal=22%
GSE6875_TCONV_VS_TREG_DN	GSE6875_TCONV_VS_TREG_DN		129	0.262623	1.07026	0.313725	0.956722	1	1884	tags=23%, list=16%, signal=27%
GOMF_HISTONE_KINASE_ACTIVITY	GOMF_HISTONE_KINASE_ACTIVITY		15	0.418375	1.07025	0.381733	0.955662	1	847	tags=13%, list=7%, signal=14%
GSE41867_NAIVE_VS_DAY15_LCMV_EFFECTOR_CD8_TCELL_UP	GSE41867_NAIVE_VS_DAY15_LCMV_EFFECTOR_CD8_TCELL_UP		162	0.261117	1.0695	0.330144	0.95812	1	2506	tags=25%, list=21%, signal=31%
HP_PITUITARY_HYPOTHYROIDISM	HP_PITUITARY_HYPOTHYROIDISM		20	0.393329	1.0691	0.359897	0.959014	1	2743	tags=40%, list=23%, signal=52%
GSE24102_GRANULOCYSTIC_MDSC_VS_NEUTROPHIL_UP	GSE24102_GRANULOCYSTIC_MDSC_VS_NEUTROPHIL_UP		164	0.257007	1.06902	0.293103	0.958326	1	2124	tags=21%, list=18%, signal=25%
GOBP_REGULATION_OF_MICROTUBULE_DEPOLYMERIZATION	GOBP_REGULATION_OF_MICROTUBULE_DEPOLYMERIZATION		23	0.380503	1.06889	0.346354	0.957857	1	1675	tags=22%, list=14%, signal=25%
KEGG_MISMATCH_REPAIR	KEGG_MISMATCH_REPAIR		20	0.380151	1.06864	0.353846	0.958058	1	3792	tags=35%, list=32%, signal=51%
HP_LIMB_PAIN	HP_LIMB_PAIN		18	0.384487	1.06813	0.361323	0.959501	1	31	tags=6%, list=0%, signal=6%
KEGG_PURINE_METABOLISM	KEGG_PURINE_METABOLISM		115	0.281669	1.06812	0.306122	0.958459	1	2054	tags=26%, list=17%, signal=31%
GSE17974_IL4_AND_ANTI_IL12_VS_UNTREATED_0.5H_ACT_CD4_TCELL_UP	GSE17974_IL4_AND_ANTI_IL12_VS_UNTREATED_0.5H_ACT_CD4_TCELL_UP		116	0.269487	1.06754	0.311284	0.960281	1	758	tags=9%, list=6%, signal=9%
HP_ABNORMAL_ENCHONDRAL_OSSIFICATION	HP_ABNORMAL_ENCHONDRAL_OSSIFICATION		89	0.282496	1.06699	0.330961	0.961963	1	1290	tags=17%, list=11%, signal=19%
GOBP_POSITIVE_REGULATION_OF_SUBSTRATE_ADHESION_DEPENDENT_CELL_SPREADING	GOBP_POSITIVE_REGULATION_OF_SUBSTRATE_ADHESION_DEPENDENT_CELL_SPREADING		34	0.341536	1.0666	0.371429	0.962778	1	1611	tags=24%, list=14%, signal=27%
QI_PBMC_ZOSTAVAX_AGE_50_75YO_CORRELATED_WITH_CONTRACTION_OF_VZV_SPECIFIC_T_CELLS_PEAK_TO_28DYAT_1DY_NEGATIVE	QI_PBMC_ZOSTAVAX_AGE_50_75YO_CORRELATED_WITH_CONTRACTION_OF_VZV_SPECIFIC_T_CELLS_PEAK_TO_28DYAT_1DY_NEGATIVE		141	0.266873	1.06647	0.302752	0.962412	1	2417	tags=33%, list=20%, signal=41%
HP_MUSCLE_STIFFNESS	HP_MUSCLE_STIFFNESS		53	0.309563	1.06635	0.292308	0.961893	1	1821	tags=21%, list=15%, signal=24%
GSE1460_DP_THYMOCYTE_VS_THYMIC_STROMAL_CELL_DN	GSE1460_DP_THYMOCYTE_VS_THYMIC_STROMAL_CELL_DN		153	0.260001	1.06562	0.290909	0.964433	1	1453	tags=13%, list=12%, signal=15%
GSE13762_CTRL_VS_125_VITAMIND_DAY12_DC_DN	GSE13762_CTRL_VS_125_VITAMIND_DAY12_DC_DN		79	0.284752	1.06549	0.309609	0.963976	1	960	tags=14%, list=8%, signal=15%
GOCC_MEDIATOR_COMPLEX	GOCC_MEDIATOR_COMPLEX		36	0.329774	1.06549	0.329545	0.962922	1	1984	tags=22%, list=17%, signal=27%
GOMF_METALLOEXOPEPTIDASE_ACTIVITY	GOMF_METALLOEXOPEPTIDASE_ACTIVITY		44	0.321472	1.06534	0.357341	0.962581	1	930	tags=16%, list=8%, signal=17%
GSE4590_SMALL_VS_VPREB_POS_LARGE_PRE_BCELL_UP	GSE4590_SMALL_VS_VPREB_POS_LARGE_PRE_BCELL_UP		149	0.259857	1.06503	0.309524	0.963027	1	3750	tags=42%, list=32%, signal=61%
HP_RETINAL_ATROPHY	HP_RETINAL_ATROPHY		66	0.291909	1.06503	0.309598	0.961967	1	455	tags=11%, list=4%, signal=11%
GSE24574_BCL6_LOW_TFH_VS_TCONV_CD4_TCELL_UP	GSE24574_BCL6_LOW_TFH_VS_TCONV_CD4_TCELL_UP		132	0.264043	1.06498	0.285124	0.961164	1	1295	tags=14%, list=11%, signal=16%
GSE39820_TGFBETA1_IL6_VS_TGFBETA1_IL6_IL23A_TREATED_CD4_TCELL_DN	GSE39820_TGFBETA1_IL6_VS_TGFBETA1_IL6_IL23A_TREATED_CD4_TCELL_DN		142	0.264484	1.06484	0.274775	0.960794	1	2456	tags=31%, list=21%, signal=39%
HP_ABNORMAL_PULMONARY_VALVE_PHYSIOLOGY	HP_ABNORMAL_PULMONARY_VALVE_PHYSIOLOGY		102	0.276203	1.06422	0.346154	0.962823	1	2535	tags=22%, list=21%, signal=27%
GOCC_CATALYTIC_STEP_2_SPLICEOSOME	GOCC_CATALYTIC_STEP_2_SPLICEOSOME		72	0.295627	1.06421	0.309446	0.96178	1	3839	tags=36%, list=32%, signal=53%
GSE15330_LYMPHOID_MULTIPOTENT_VS_MEGAKARYOCYTE_ERYTHROID_PROGENITOR_IKAROS_KO_UP	GSE15330_LYMPHOID_MULTIPOTENT_VS_MEGAKARYOCYTE_ERYTHROID_PROGENITOR_IKAROS_KO_UP		139	0.268704	1.06413	0.27897	0.961151	1	2868	tags=33%, list=24%, signal=43%
HP_ABNORMALITY_OF_LOWER_LIMB_EPIPHYSIS_MORPHOLOGY	HP_ABNORMALITY_OF_LOWER_LIMB_EPIPHYSIS_MORPHOLOGY		50	0.317335	1.06399	0.366972	0.960731	1	1627	tags=20%, list=14%, signal=23%
KEGG_DRUG_METABOLISM_CYTOCHROME_P450	KEGG_DRUG_METABOLISM_CYTOCHROME_P450		19	0.393915	1.06388	0.381062	0.960241	1	1071	tags=21%, list=9%, signal=23%
GOBP_PROTEIN_DNA_COMPLEX_SUBUNIT_ORGANIZATION	GOBP_PROTEIN_DNA_COMPLEX_SUBUNIT_ORGANIZATION		173	0.258214	1.06311	0.259459	0.962839	1	3620	tags=35%, list=31%, signal=50%
GOMF_MANGANESE_ION_BINDING	GOMF_MANGANESE_ION_BINDING		55	0.304932	1.06306	0.367052	0.961998	1	906	tags=13%, list=8%, signal=14%
GSE411_WT_VS_SOCS3_KO_MACROPHAGE_DN	GSE411_WT_VS_SOCS3_KO_MACROPHAGE_DN		174	0.254146	1.06269	0.278607	0.962755	1	2846	tags=26%, list=24%, signal=34%
GOMF_ACETYLTRANSFERASE_ACTIVITY	GOMF_ACETYLTRANSFERASE_ACTIVITY		69	0.298419	1.06181	0.339869	0.96602	1	1499	tags=16%, list=13%, signal=18%
GOCC_NUCLEOID	GOCC_NUCLEOID		41	0.317828	1.06173	0.359773	0.965354	1	2330	tags=22%, list=20%, signal=27%
HP_POLYDACTYLY	HP_POLYDACTYLY		179	0.255219	1.0609	0.333333	0.968397	1	2782	tags=28%, list=24%, signal=37%
HP_ABNORMAL_POSTERIOR_SEGMENT_IMAGING	HP_ABNORMAL_POSTERIOR_SEGMENT_IMAGING		16	0.407637	1.06052	0.356436	0.969198	1	2953	tags=38%, list=25%, signal=50%
HP_ESOPHAGEAL_ATRESIA	HP_ESOPHAGEAL_ATRESIA		19	0.383253	1.0601	0.363636	0.97009	1	1599	tags=32%, list=14%, signal=36%
QI_PBMC_ZOSTAVAX_AGE_50_75YO_CORRELATED_WITH_28D_PEAK_T_CELL_RESPONSE_14DY_NEGATIVE	QI_PBMC_ZOSTAVAX_AGE_50_75YO_CORRELATED_WITH_28D_PEAK_T_CELL_RESPONSE_14DY_NEGATIVE		33	0.341251	1.06002	0.366477	0.969466	1	1069	tags=12%, list=9%, signal=13%
GOMF_N_METHYLTRANSFERASE_ACTIVITY	GOMF_N_METHYLTRANSFERASE_ACTIVITY		76	0.294008	1.05976	0.363014	0.96971	1	3829	tags=41%, list=32%, signal=60%
GSE15930_NAIVE_VS_24H_IN_VITRO_STIM_IL12_CD8_TCELL_DN	GSE15930_NAIVE_VS_24H_IN_VITRO_STIM_IL12_CD8_TCELL_DN		174	0.259476	1.05962	0.311403	0.969314	1	1684	tags=17%, list=14%, signal=19%
HP_ABNORMALITY_OF_VITAMIN_METABOLISM	HP_ABNORMALITY_OF_VITAMIN_METABOLISM		52	0.309179	1.05942	0.325503	0.969243	1	866	tags=13%, list=7%, signal=14%
GOBP_REGULATION_OF_GOLGI_ORGANIZATION	GOBP_REGULATION_OF_GOLGI_ORGANIZATION		15	0.399537	1.05891	0.354369	0.970713	1	3563	tags=47%, list=30%, signal=67%
HP_WEBBED_NECK	HP_WEBBED_NECK		80	0.285524	1.05839	0.336918	0.972228	1	2535	tags=29%, list=21%, signal=36%
GOBP_MICROTUBULE_BUNDLE_FORMATION	GOBP_MICROTUBULE_BUNDLE_FORMATION		66	0.295838	1.05831	0.340764	0.971544	1	990	tags=23%, list=8%, signal=25%
GSE21063_CTRL_VS_ANTI_IGM_STIM_BCELL_NFATC1_KO_8H_DN	GSE21063_CTRL_VS_ANTI_IGM_STIM_BCELL_NFATC1_KO_8H_DN		168	0.254474	1.05815	0.324074	0.971294	1	3724	tags=40%, list=32%, signal=58%
GOMF_UBIQUITIN_CONJUGATING_ENZYME_BINDING	GOMF_UBIQUITIN_CONJUGATING_ENZYME_BINDING		27	0.356647	1.05731	0.35589	0.974352	1	3762	tags=56%, list=32%, signal=81%
HP_HYPOPLASTIC_LABIA_MINORA	HP_HYPOPLASTIC_LABIA_MINORA		20	0.379014	1.05719	0.380488	0.973908	1	1290	tags=20%, list=11%, signal=22%
HP_PROXIMAL_TUBULOPATHY	HP_PROXIMAL_TUBULOPATHY		43	0.327442	1.05692	0.347953	0.974155	1	2416	tags=33%, list=20%, signal=41%
GOBP_LIPID_DROPLET_ORGANIZATION	GOBP_LIPID_DROPLET_ORGANIZATION		19	0.388904	1.05681	0.38404	0.973634	1	163	tags=11%, list=1%, signal=11%
GOBP_REGULATION_OF_MRNA_SPLICING_VIA_SPLICEOSOME	GOBP_REGULATION_OF_MRNA_SPLICING_VIA_SPLICEOSOME		77	0.287799	1.0565	0.344828	0.974093	1	3800	tags=35%, list=32%, signal=51%
HP_ABNORMALITY_OF_THE_RIBS	HP_ABNORMALITY_OF_THE_RIBS		201	0.253669	1.05639	0.275132	0.973576	1	1503	tags=17%, list=13%, signal=20%
GSE22432_MULTIPOTENT_VS_COMMON_DC_PROGENITOR_UNTREATED_DN	GSE22432_MULTIPOTENT_VS_COMMON_DC_PROGENITOR_UNTREATED_DN		167	0.25418	1.05616	0.314136	0.973716	1	2785	tags=29%, list=24%, signal=37%
HP_PANCREATIC_ADENOCARCINOMA	HP_PANCREATIC_ADENOCARCINOMA		23	0.368123	1.055	0.387342	0.978374	1	3219	tags=43%, list=27%, signal=60%
HP_OSTEOMALACIA	HP_OSTEOMALACIA		19	0.380689	1.05494	0.387409	0.977614	1	908	tags=26%, list=8%, signal=28%
HP_ABNORMALITY_OF_FEMALE_EXTERNAL_GENITALIA	HP_ABNORMALITY_OF_FEMALE_EXTERNAL_GENITALIA		103	0.273419	1.05421	0.352941	0.980188	1	2539	tags=24%, list=21%, signal=31%
GOBP_CELLULAR_RESPONSE_TO_VITAMIN	GOBP_CELLULAR_RESPONSE_TO_VITAMIN		22	0.377845	1.0538	0.374359	0.981176	1	997	tags=27%, list=8%, signal=30%
GOBP_ATP_METABOLIC_PROCESS	GOBP_ATP_METABOLIC_PROCESS		228	0.241288	1.05269	0.251534	0.985675	1	2243	tags=22%, list=19%, signal=27%
GOBP_FEMALE_GENITALIA_DEVELOPMENT	GOBP_FEMALE_GENITALIA_DEVELOPMENT		15	0.4063	1.05225	0.382353	0.986832	1	569	tags=20%, list=5%, signal=21%
GSE28783_CTRL_ANTI_MIR_VS_UNTREATED_ATHEROSCLEROSIS_MACROPHAGE_UP	GSE28783_CTRL_ANTI_MIR_VS_UNTREATED_ATHEROSCLEROSIS_MACROPHAGE_UP		133	0.266804	1.05188	0.330317	0.987618	1	1037	tags=14%, list=9%, signal=15%
HP_ABNORMAL_BASAL_GANGLIA_MRI_SIGNAL_INTENSITY	HP_ABNORMAL_BASAL_GANGLIA_MRI_SIGNAL_INTENSITY		44	0.323753	1.05126	0.340764	0.989724	1	2875	tags=32%, list=24%, signal=42%
GSE2706_R848_VS_LPS_2H_STIM_DC_UP	GSE2706_R848_VS_LPS_2H_STIM_DC_UP		80	0.28278	1.05048	0.336879	0.992573	1	1936	tags=21%, list=16%, signal=25%
HP_POOR_EYE_CONTACT	HP_POOR_EYE_CONTACT		68	0.299324	1.04977	0.356688	0.995009	1	4155	tags=49%, list=35%, signal=74%
HP_ATRESIA_OF_THE_EXTERNAL_AUDITORY_CANAL	HP_ATRESIA_OF_THE_EXTERNAL_AUDITORY_CANAL		38	0.332348	1.0495	0.352113	0.995311	1	1685	tags=21%, list=14%, signal=24%
HP_UNILATERAL_RENAL_AGENESIS	HP_UNILATERAL_RENAL_AGENESIS		48	0.320051	1.04942	0.365079	0.994618	1	4532	tags=52%, list=38%, signal=84%
HP_IRIS_HYPOPIGMENTATION	HP_IRIS_HYPOPIGMENTATION		38	0.3337	1.04897	0.37037	0.995895	1	1281	tags=18%, list=11%, signal=21%
GSE24210_CTRL_VS_IL35_TREATED_TCONV_CD4_TCELL_DN	GSE24210_CTRL_VS_IL35_TREATED_TCONV_CD4_TCELL_DN		167	0.256557	1.04882	0.323672	0.995582	1	2111	tags=20%, list=18%, signal=24%
GOCC_PROTON_TRANSPORTING_ATP_SYNTHASE_COMPLEX	GOCC_PROTON_TRANSPORTING_ATP_SYNTHASE_COMPLEX		15	0.402741	1.04876	0.400485	0.994828	1	1742	tags=33%, list=15%, signal=39%
HP_ULNAR_DEVIATION_OF_FINGER	HP_ULNAR_DEVIATION_OF_FINGER		18	0.377247	1.04849	0.378446	0.995145	1	5	tags=6%, list=0%, signal=6%
GSE3720_LPS_VS_PMA_STIM_VD1_GAMMADELTA_TCELL_DN	GSE3720_LPS_VS_PMA_STIM_VD1_GAMMADELTA_TCELL_DN		143	0.261167	1.04712	0.338983	1	1	2462	tags=35%, list=21%, signal=44%
GOMF_CHANNEL_INHIBITOR_ACTIVITY	GOMF_CHANNEL_INHIBITOR_ACTIVITY		26	0.354245	1.04687	0.381068	1	1	2579	tags=42%, list=22%, signal=54%
GSE19888_ADENOSINE_A3R_INH_VS_ACT_IN_MAST_CELL_UP	GSE19888_ADENOSINE_A3R_INH_VS_ACT_IN_MAST_CELL_UP		160	0.260781	1.04683	0.295918	1	1	2941	tags=27%, list=25%, signal=35%
GSE360_L_MAJOR_VS_T_GONDII_DC_UP	GSE360_L_MAJOR_VS_T_GONDII_DC_UP		102	0.272527	1.04654	0.320423	1	1	1862	tags=24%, list=16%, signal=28%
HP_UPPER_LIMB_UNDERGROWTH	HP_UPPER_LIMB_UNDERGROWTH		69	0.293795	1.046	0.371429	1	1	2489	tags=32%, list=21%, signal=40%
HP_DUPLICATION_INVOLVING_BONES_OF_THE_FEET	HP_DUPLICATION_INVOLVING_BONES_OF_THE_FEET		93	0.281351	1.04589	0.364706	1	1	2577	tags=28%, list=22%, signal=35%
GSE13738_RESTING_VS_TCR_ACTIVATED_CD4_TCELL_UP	GSE13738_RESTING_VS_TCR_ACTIVATED_CD4_TCELL_UP		137	0.261056	1.04581	0.352941	1	1	1643	tags=16%, list=14%, signal=18%
HP_IMPAIRED_SMOOTH_PURSUIT	HP_IMPAIRED_SMOOTH_PURSUIT		28	0.348882	1.04553	0.377005	1	1	4092	tags=46%, list=35%, signal=71%
HP_INCREASED_MUSCLE_LIPID_CONTENT	HP_INCREASED_MUSCLE_LIPID_CONTENT		15	0.398589	1.04531	0.395683	1	1	3471	tags=40%, list=29%, signal=57%
HP_ABNORMALITY_OF_THE_PREPUTIUM	HP_ABNORMALITY_OF_THE_PREPUTIUM		29	0.343025	1.04503	0.395466	1	1	3135	tags=45%, list=27%, signal=61%
HP_CONVEX_NASAL_RIDGE	HP_CONVEX_NASAL_RIDGE		58	0.301153	1.045	0.37963	1	1	2395	tags=24%, list=20%, signal=30%
GSE21927_SPLEEN_C57BL6_VS_EL4_TUMOR_BALBC_MONOCYTES_UP	GSE21927_SPLEEN_C57BL6_VS_EL4_TUMOR_BALBC_MONOCYTES_UP		167	0.254206	1.04428	0.325123	1	1	2668	tags=31%, list=23%, signal=40%
HP_ORGANIC_ACIDURIA	HP_ORGANIC_ACIDURIA		60	0.302962	1.0437	0.371622	1	1	3718	tags=43%, list=31%, signal=63%
HP_HYPOHIDROSIS	HP_HYPOHIDROSIS		43	0.318507	1.04345	0.385269	1	1	271	tags=9%, list=2%, signal=9%
GSE40655_FOXO1_KO_VS_WT_NTREG_DN	GSE40655_FOXO1_KO_VS_WT_NTREG_DN		139	0.261762	1.0434	0.325893	1	1	1890	tags=25%, list=16%, signal=30%
GSE40225_WT_VS_RIP_B7X_DIABETIC_MOUSE_PANCREATIC_CD8_TCELL_UP	GSE40225_WT_VS_RIP_B7X_DIABETIC_MOUSE_PANCREATIC_CD8_TCELL_UP		157	0.25063	1.04308	0.356784	1	1	2761	tags=29%, list=23%, signal=38%
GSE16385_UNTREATED_VS_12H_ROSIGLITAZONE_IFNG_TNF_TREATED_MACROPHAGE_DN	GSE16385_UNTREATED_VS_12H_ROSIGLITAZONE_IFNG_TNF_TREATED_MACROPHAGE_DN		137	0.260566	1.04306	0.318584	1	1	2660	tags=36%, list=23%, signal=46%
GSE36888_UNTREATED_VS_IL2_TREATED_TCELL_6H_DN	GSE36888_UNTREATED_VS_IL2_TREATED_TCELL_6H_DN		159	0.253828	1.04295	0.35514	1	1	1797	tags=21%, list=15%, signal=25%
GSE8921_UNSTIM_0H_VS_TLR1_2_STIM_MONOCYTE_12H_UP	GSE8921_UNSTIM_0H_VS_TLR1_2_STIM_MONOCYTE_12H_UP		160	0.254587	1.04203	0.312217	1	1	2743	tags=29%, list=23%, signal=37%
GSE42088_UNINF_VS_LEISHMANIA_INF_DC_2H_DN	GSE42088_UNINF_VS_LEISHMANIA_INF_DC_2H_DN		146	0.260323	1.0409	0.387755	1	1	2605	tags=34%, list=22%, signal=43%
HP_THROMBOCYTOSIS	HP_THROMBOCYTOSIS		36	0.326604	1.04058	0.398844	1	1	1491	tags=28%, list=13%, signal=32%
GOBP_G2_DNA_DAMAGE_CHECKPOINT	GOBP_G2_DNA_DAMAGE_CHECKPOINT		32	0.334179	1.04046	0.402089	1	1	1603	tags=22%, list=14%, signal=25%
HP_LEUKEMIA	HP_LEUKEMIA		111	0.268393	1.04044	0.357143	1	1	1491	tags=21%, list=13%, signal=23%
GSE38697_LIGHT_ZONE_VS_DARK_ZONE_BCELL_UP	GSE38697_LIGHT_ZONE_VS_DARK_ZONE_BCELL_UP		146	0.252164	1.04024	0.341346	1	1	2517	tags=27%, list=21%, signal=34%
GOBP_CELLULAR_RESPONSE_TO_CARBOHYDRATE_STIMULUS	GOBP_CELLULAR_RESPONSE_TO_CARBOHYDRATE_STIMULUS		90	0.276508	1.04002	0.360595	1	1	847	tags=14%, list=7%, signal=15%
HP_AMBIGUOUS_GENITALIA	HP_AMBIGUOUS_GENITALIA		71	0.286869	1.03986	0.394904	1	1	1818	tags=18%, list=15%, signal=22%
GSE26928_EFF_MEM_VS_CENTR_MEM_CD4_TCELL_DN	GSE26928_EFF_MEM_VS_CENTR_MEM_CD4_TCELL_DN		108	0.26912	1.03952	0.348921	1	1	2577	tags=31%, list=22%, signal=39%
GAUCHER_PBMC_YF_VAX_STAMARIL_UNKNOWN_AGE_60DY_DN	GAUCHER_PBMC_YF_VAX_STAMARIL_UNKNOWN_AGE_60DY_DN		25	0.364641	1.03893	0.391414	1	1	1467	tags=28%, list=12%, signal=32%
GSE43863_NAIVE_VS_LY6C_INT_CXCR5POS_CD4_EFF_TCELL_D6_LCMV_UP	GSE43863_NAIVE_VS_LY6C_INT_CXCR5POS_CD4_EFF_TCELL_D6_LCMV_UP		146	0.25705	1.03888	0.352381	1	1	2937	tags=31%, list=25%, signal=41%
HP_CONGENITAL_HEPATIC_FIBROSIS	HP_CONGENITAL_HEPATIC_FIBROSIS		35	0.329032	1.03884	0.38764	1	1	2772	tags=40%, list=23%, signal=52%
GOMF_EXTRACELLULAR_MATRIX_STRUCTURAL_CONSTITUENT_CONFERRING_TENSILE_STRENGTH	GOMF_EXTRACELLULAR_MATRIX_STRUCTURAL_CONSTITUENT_CONFERRING_TENSILE_STRENGTH		29	0.344546	1.0385	0.381471	1	1	747	tags=17%, list=6%, signal=18%
GSE19888_CTRL_VS_A3R_INHIBITOR_TREATED_MAST_CELL_UP	GSE19888_CTRL_VS_A3R_INHIBITOR_TREATED_MAST_CELL_UP		160	0.247268	1.03835	0.364532	1	1	2968	tags=33%, list=25%, signal=44%
GSE17974_0.5H_VS_72H_UNTREATED_IN_VITRO_CD4_TCELL_DN	GSE17974_0.5H_VS_72H_UNTREATED_IN_VITRO_CD4_TCELL_DN		158	0.252893	1.03792	0.376812	1	1	2267	tags=26%, list=19%, signal=32%
HP_CHORIORETINAL_COLOBOMA	HP_CHORIORETINAL_COLOBOMA		30	0.340129	1.03776	0.384422	1	1	2555	tags=33%, list=22%, signal=42%
HP_ABNORMAL_LABIA_MINORA_MORPHOLOGY	HP_ABNORMAL_LABIA_MINORA_MORPHOLOGY		26	0.351336	1.03771	0.428191	1	1	1290	tags=19%, list=11%, signal=22%
GOMF_ORGANIC_HYDROXY_COMPOUND_TRANSMEMBRANE_TRANSPORTER_ACTIVITY	GOMF_ORGANIC_HYDROXY_COMPOUND_TRANSMEMBRANE_TRANSPORTER_ACTIVITY		19	0.375938	1.03704	0.416	1	1	27	tags=11%, list=0%, signal=11%
HP_FRONTAL_LOBE_DEMENTIA	HP_FRONTAL_LOBE_DEMENTIA		15	0.403091	1.03684	0.414579	1	1	303	tags=13%, list=3%, signal=14%
HP_RETICULOCYTOPENIA	HP_RETICULOCYTOPENIA		23	0.366828	1.03661	0.386256	1	1	1139	tags=43%, list=10%, signal=48%
GSE9946_LISTERIA_INF_MATURE_VS_PROSTAGLANDINE2_TREATED_MATURE_DC_DN	GSE9946_LISTERIA_INF_MATURE_VS_PROSTAGLANDINE2_TREATED_MATURE_DC_DN		52	0.29759	1.03643	0.387195	1	1	1573	tags=29%, list=13%, signal=33%
GOBP_REGULATION_OF_TRANSCRIPTION_INITIATION_FROM_RNA_POLYMERASE_II_PROMOTER	GOBP_REGULATION_OF_TRANSCRIPTION_INITIATION_FROM_RNA_POLYMERASE_II_PROMOTER		28	0.350109	1.03639	0.410468	1	1	2766	tags=25%, list=23%, signal=33%
GOMF_CARBOXYPEPTIDASE_ACTIVITY	GOMF_CARBOXYPEPTIDASE_ACTIVITY		28	0.342853	1.03625	0.411429	1	1	930	tags=21%, list=8%, signal=23%
GSE17721_0.5H_VS_4H_POLYIC_BMDC_UP	GSE17721_0.5H_VS_4H_POLYIC_BMDC_UP		150	0.254591	1.03583	0.359813	1	1	2685	tags=23%, list=23%, signal=30%
HP_ABNORMAL_MALE_REPRODUCTIVE_SYSTEM_PHYSIOLOGY	HP_ABNORMAL_MALE_REPRODUCTIVE_SYSTEM_PHYSIOLOGY		155	0.258398	1.0356	0.375635	1	1	990	tags=14%, list=8%, signal=15%
GSE32901_TH1_VS_TH17_ENRICHED_CD4_TCELL_DN	GSE32901_TH1_VS_TH17_ENRICHED_CD4_TCELL_DN		113	0.262757	1.03546	0.347985	1	1	2915	tags=33%, list=25%, signal=43%
HP_HYPERTRIGLYCERIDEMIA	HP_HYPERTRIGLYCERIDEMIA		64	0.289123	1.03535	0.379538	1	1	576	tags=14%, list=5%, signal=15%
HP_CHORIORETINAL_DEGENERATION	HP_CHORIORETINAL_DEGENERATION		15	0.405803	1.0345	0.383333	1	1	26	tags=7%, list=0%, signal=7%
GSE23502_WT_VS_HDC_KO_MYELOID_DERIVED_SUPPRESSOR_CELL_BM_UP	GSE23502_WT_VS_HDC_KO_MYELOID_DERIVED_SUPPRESSOR_CELL_BM_UP		170	0.249553	1.03399	0.368421	1	1	3190	tags=41%, list=27%, signal=56%
GSE46606_IRF4MID_VS_WT_CD40L_IL2_IL5_DAY1_STIMULATED_BCELL_UP	GSE46606_IRF4MID_VS_WT_CD40L_IL2_IL5_DAY1_STIMULATED_BCELL_UP		166	0.247424	1.03392	0.360406	1	1	2163	tags=24%, list=18%, signal=29%
GOBP_REGULATION_OF_DENDRITE_MORPHOGENESIS	GOBP_REGULATION_OF_DENDRITE_MORPHOGENESIS		49	0.299377	1.0339	0.346041	1	1	2664	tags=27%, list=23%, signal=34%
GOBP_ATP_SYNTHESIS_COUPLED_PROTON_TRANSPORT	GOBP_ATP_SYNTHESIS_COUPLED_PROTON_TRANSPORT		18	0.38764	1.03382	0.415865	1	1	3622	tags=56%, list=31%, signal=80%
GSE22601_DOUBLE_POSITIVE_VS_CD4_SINGLE_POSITIVE_THYMOCYTE_UP	GSE22601_DOUBLE_POSITIVE_VS_CD4_SINGLE_POSITIVE_THYMOCYTE_UP		118	0.261345	1.03361	0.356557	1	1	2815	tags=31%, list=24%, signal=40%
HP_ABNORMAL_SHARPEY_FIBER_MORPHOLOGY	HP_ABNORMAL_SHARPEY_FIBER_MORPHOLOGY		16	0.385203	1.03354	0.418782	1	1	813	tags=19%, list=7%, signal=20%
GOBP_MICROTUBULE_DEPOLYMERIZATION	GOBP_MICROTUBULE_DEPOLYMERIZATION		35	0.335009	1.03344	0.419023	1	1	2825	tags=31%, list=24%, signal=41%
GSE45365_WT_VS_IFNAR_KO_CD8A_DC_MCMV_INFECTION_DN	GSE45365_WT_VS_IFNAR_KO_CD8A_DC_MCMV_INFECTION_DN		104	0.27198	1.03328	0.366038	1	1	1103	tags=12%, list=9%, signal=13%
GOBP_REGULATION_OF_STEM_CELL_PROLIFERATION	GOBP_REGULATION_OF_STEM_CELL_PROLIFERATION		29	0.353995	1.03306	0.400504	1	1	1199	tags=17%, list=10%, signal=19%
GSE15750_WT_VS_TRAF6KO_DAY10_EFF_CD8_TCELL_UP	GSE15750_WT_VS_TRAF6KO_DAY10_EFF_CD8_TCELL_UP		164	0.245618	1.03209	0.383784	1	1	3084	tags=38%, list=26%, signal=50%
GSE22935_UNSTIM_VS_48H_MBOVIS_BCG_STIM_MACROPHAGE_UP	GSE22935_UNSTIM_VS_48H_MBOVIS_BCG_STIM_MACROPHAGE_UP		108	0.268995	1.03197	0.369565	1	1	2473	tags=28%, list=21%, signal=35%
GOBP_NAD_BIOSYNTHETIC_PROCESS	GOBP_NAD_BIOSYNTHETIC_PROCESS		18	0.382122	1.03195	0.418269	1	1	690	tags=22%, list=6%, signal=24%
GOMF_ACTIN_MONOMER_BINDING	GOMF_ACTIN_MONOMER_BINDING		19	0.381881	1.03138	0.411911	1	1	396	tags=11%, list=3%, signal=11%
HP_DEVELOPMENTAL_CATARACT	HP_DEVELOPMENTAL_CATARACT		87	0.277339	1.03128	0.350181	1	1	3556	tags=38%, list=30%, signal=54%
GOBP_TERPENOID_METABOLIC_PROCESS	GOBP_TERPENOID_METABOLIC_PROCESS		63	0.290105	1.03113	0.371951	1	1	1225	tags=22%, list=10%, signal=25%
HP_BROAD_HALLUX_PHALANX	HP_BROAD_HALLUX_PHALANX		15	0.400023	1.03083	0.425837	1	1	1284	tags=27%, list=11%, signal=30%
HP_ABNORMAL_ALDOLASE_LEVEL	HP_ABNORMAL_ALDOLASE_LEVEL		18	0.388782	1.03077	0.42402	1	1	277	tags=11%, list=2%, signal=11%
GOBP_MATURATION_OF_LSU_RRNA	GOBP_MATURATION_OF_LSU_RRNA		20	0.378323	1.0307	0.406736	1	1	3584	tags=40%, list=30%, signal=57%
HP_ABNORMAL_AORTIC_ARCH_MORPHOLOGY	HP_ABNORMAL_AORTIC_ARCH_MORPHOLOGY		34	0.330311	1.02918	0.394521	1	1	1271	tags=12%, list=11%, signal=13%
GSE3982_DC_VS_BASOPHIL_DN	GSE3982_DC_VS_BASOPHIL_DN		160	0.255439	1.02914	0.383838	1	1	1593	tags=18%, list=13%, signal=20%
HP_NEOPLASM_OF_THE_GENITOURINARY_TRACT	HP_NEOPLASM_OF_THE_GENITOURINARY_TRACT		162	0.251194	1.02882	0.384259	1	1	1284	tags=16%, list=11%, signal=18%
HP_ABNORMAL_MORPHOLOGY_OF_THE_CHOROIDAL_VASCULATURE	HP_ABNORMAL_MORPHOLOGY_OF_THE_CHOROIDAL_VASCULATURE		15	0.402164	1.02809	0.417453	1	1	446	tags=27%, list=4%, signal=28%
GOBP_PEROXISOME_ORGANIZATION	GOBP_PEROXISOME_ORGANIZATION		55	0.303345	1.02794	0.392442	1	1	3381	tags=40%, list=29%, signal=56%
HP_ABNORMAL_ELECTRORETINOGRAM	HP_ABNORMAL_ELECTRORETINOGRAM		115	0.265269	1.02786	0.379592	1	1	1655	tags=17%, list=14%, signal=20%
HP_ABNORMALITY_OF_THE_URETHRA	HP_ABNORMALITY_OF_THE_URETHRA		286	0.232882	1.02776	0.37069	1	1	2558	tags=22%, list=22%, signal=27%
HP_RETINAL_DYSTROPHY	HP_RETINAL_DYSTROPHY		221	0.240511	1.02741	0.358382	1	1	3024	tags=31%, list=26%, signal=41%
HP_ABNORMAL_BLOOD_POTASSIUM_CONCENTRATION	HP_ABNORMAL_BLOOD_POTASSIUM_CONCENTRATION		51	0.306012	1.02664	0.411765	1	1	908	tags=14%, list=8%, signal=15%
GSE5099_UNSTIM_VS_MCSF_TREATED_MONOCYTE_DAY3_UP	GSE5099_UNSTIM_VS_MCSF_TREATED_MONOCYTE_DAY3_UP		153	0.249273	1.02606	0.409574	1	1	2656	tags=27%, list=22%, signal=34%
HP_ANAL_STENOSIS	HP_ANAL_STENOSIS		22	0.359819	1.02584	0.408867	1	1	2448	tags=32%, list=21%, signal=40%
GOBP_NEGATIVE_REGULATION_OF_PEPTIDE_HORMONE_SECRETION	GOBP_NEGATIVE_REGULATION_OF_PEPTIDE_HORMONE_SECRETION		23	0.365152	1.0258	0.415789	1	1	878	tags=22%, list=7%, signal=23%
GOBP_GLANDULAR_EPITHELIAL_CELL_DIFFERENTIATION	GOBP_GLANDULAR_EPITHELIAL_CELL_DIFFERENTIATION		28	0.344644	1.02578	0.397959	1	1	1816	tags=29%, list=15%, signal=34%
HP_WIDELY_PATENT_FONTANELLES_AND_SUTURES	HP_WIDELY_PATENT_FONTANELLES_AND_SUTURES		15	0.401419	1.02558	0.40281	1	1	1173	tags=33%, list=10%, signal=37%
GOMF_ENDORIBONUCLEASE_ACTIVITY	GOMF_ENDORIBONUCLEASE_ACTIVITY		46	0.305662	1.02496	0.418605	1	1	2742	tags=37%, list=23%, signal=48%
KEGG_ARACHIDONIC_ACID_METABOLISM	KEGG_ARACHIDONIC_ACID_METABOLISM		26	0.346616	1.02487	0.413625	1	1	1598	tags=31%, list=14%, signal=36%
GSE411_100MIN_VS_400MIN_IL6_STIM_MACROPHAGE_DN	GSE411_100MIN_VS_400MIN_IL6_STIM_MACROPHAGE_DN		170	0.244427	1.02485	0.357143	1	1	2999	tags=31%, list=25%, signal=40%
GOBP_REGULATION_OF_MITOCHONDRIAL_MEMBRANE_POTENTIAL	GOBP_REGULATION_OF_MITOCHONDRIAL_MEMBRANE_POTENTIAL		54	0.295873	1.02456	0.398176	1	1	812	tags=13%, list=7%, signal=14%
GOBP_REGULATION_OF_CELLULAR_CARBOHYDRATE_METABOLIC_PROCESS	GOBP_REGULATION_OF_CELLULAR_CARBOHYDRATE_METABOLIC_PROCESS		103	0.263635	1.02443	0.392562	1	1	303	tags=7%, list=3%, signal=7%
GOBP_REGULATION_OF_LYASE_ACTIVITY	GOBP_REGULATION_OF_LYASE_ACTIVITY		23	0.353923	1.02422	0.419023	1	1	1234	tags=26%, list=10%, signal=29%
GOBP_PULMONARY_VALVE_MORPHOGENESIS	GOBP_PULMONARY_VALVE_MORPHOGENESIS		15	0.39026	1.02414	0.441589	1	1	27	tags=7%, list=0%, signal=7%
GSE32533_WT_VS_MIR17_OVEREXPRESS_ACT_CD4_TCELL_DN	GSE32533_WT_VS_MIR17_OVEREXPRESS_ACT_CD4_TCELL_DN		135	0.253783	1.02387	0.38565	1	1	2565	tags=33%, list=22%, signal=41%
HP_EXTERNAL_GENITAL_HYPOPLASIA	HP_EXTERNAL_GENITAL_HYPOPLASIA		352	0.226325	1.02381	0.36036	1	1	1859	tags=17%, list=16%, signal=20%
HP_ABNORMAL_MACULAR_MORPHOLOGY	HP_ABNORMAL_MACULAR_MORPHOLOGY		101	0.267577	1.02368	0.398496	1	1	1272	tags=13%, list=11%, signal=14%
GOBP_FATTY_ACID_BETA_OXIDATION	GOBP_FATTY_ACID_BETA_OXIDATION		60	0.29213	1.02366	0.393836	1	1	1901	tags=22%, list=16%, signal=26%
GOBP_CELLULAR_RESPONSE_TO_GLUCAGON_STIMULUS	GOBP_CELLULAR_RESPONSE_TO_GLUCAGON_STIMULUS		16	0.393347	1.02366	0.407674	1	1	633	tags=13%, list=5%, signal=13%
GOBP_OLIGOSACCHARIDE_METABOLIC_PROCESS	GOBP_OLIGOSACCHARIDE_METABOLIC_PROCESS		31	0.331352	1.02302	0.407303	1	1	2087	tags=26%, list=18%, signal=31%
GOBP_DOPAMINE_TRANSPORT	GOBP_DOPAMINE_TRANSPORT		17	0.377041	1.02286	0.417453	1	1	1237	tags=18%, list=10%, signal=20%
GOBP_DEOXYRIBONUCLEOTIDE_METABOLIC_PROCESS	GOBP_DEOXYRIBONUCLEOTIDE_METABOLIC_PROCESS		30	0.334782	1.02243	0.41133	1	1	1323	tags=23%, list=11%, signal=26%
GOBP_REGULATION_OF_RESPONSE_TO_REACTIVE_OXYGEN_SPECIES	GOBP_REGULATION_OF_RESPONSE_TO_REACTIVE_OXYGEN_SPECIES		22	0.363065	1.02179	0.408978	1	1	12	tags=5%, list=0%, signal=5%
GOBP_NEGATIVE_REGULATION_OF_MRNA_PROCESSING	GOBP_NEGATIVE_REGULATION_OF_MRNA_PROCESSING		25	0.349338	1.02143	0.452316	1	1	1611	tags=12%, list=14%, signal=14%
GSE22886_NAIVE_TCELL_VS_DC_UP	GSE22886_NAIVE_TCELL_VS_DC_UP		153	0.250194	1.02134	0.373684	1	1	1507	tags=22%, list=13%, signal=24%
ANDERSON_BLOOD_CN54GP140_ADJUVANTED_WITH_GLA_AF_AGE_18_45YO_7DY_UP	ANDERSON_BLOOD_CN54GP140_ADJUVANTED_WITH_GLA_AF_AGE_18_45YO_7DY_UP		15	0.400701	1.02127	0.428198	1	1	1473	tags=33%, list=12%, signal=38%
HP_ABNORMAL_CHORIORETINAL_MORPHOLOGY	HP_ABNORMAL_CHORIORETINAL_MORPHOLOGY		93	0.269727	1.02115	0.397887	1	1	2555	tags=22%, list=22%, signal=27%
GSE18791_CTRL_VS_NEWCASTLE_VIRUS_DC_10H_UP	GSE18791_CTRL_VS_NEWCASTLE_VIRUS_DC_10H_UP		164	0.249677	1.02094	0.38835	1	1	3300	tags=35%, list=28%, signal=48%
GOBP_PROTEIN_LOCALIZATION_TO_CHROMOSOME_TELOMERIC_REGION	GOBP_PROTEIN_LOCALIZATION_TO_CHROMOSOME_TELOMERIC_REGION		27	0.344321	1.02005	0.412742	1	1	4321	tags=52%, list=37%, signal=82%
HP_HEPATIC_FIBROSIS	HP_HEPATIC_FIBROSIS		93	0.266766	1.01971	0.388	1	1	3024	tags=35%, list=26%, signal=47%
GSE11924_TFH_VS_TH1_CD4_TCELL_DN	GSE11924_TFH_VS_TH1_CD4_TCELL_DN		137	0.253148	1.01845	0.426606	1	1	3145	tags=36%, list=27%, signal=49%
HP_ABNORMALITY_OF_THE_ENDOMETRIUM	HP_ABNORMALITY_OF_THE_ENDOMETRIUM		19	0.36916	1.0179	0.430288	1	1	3219	tags=42%, list=27%, signal=58%
GSE7509_UNSTIM_VS_FCGRIIB_STIM_MONOCYTE_DN	GSE7509_UNSTIM_VS_FCGRIIB_STIM_MONOCYTE_DN		137	0.251065	1.01778	0.412017	1	1	2392	tags=21%, list=20%, signal=26%
HP_DISTAL_ARTHROGRYPOSIS	HP_DISTAL_ARTHROGRYPOSIS		15	0.403033	1.01771	0.451923	1	1	369	tags=13%, list=3%, signal=14%
GOBP_NEUROMUSCULAR_PROCESS	GOBP_NEUROMUSCULAR_PROCESS		48	0.303181	1.01712	0.441791	1	1	768	tags=15%, list=7%, signal=16%
HP_IMPAIRED_SOCIAL_INTERACTIONS	HP_IMPAIRED_SOCIAL_INTERACTIONS		96	0.265721	1.01688	0.449219	1	1	4083	tags=43%, list=35%, signal=65%
GSE35543_IN_VIVO_NTREG_VS_CONVERTED_EX_ITREG_DN	GSE35543_IN_VIVO_NTREG_VS_CONVERTED_EX_ITREG_DN		101	0.265091	1.0168	0.411321	1	1	1897	tags=29%, list=16%, signal=34%
HP_ABNORMAL_PENIS_MORPHOLOGY	HP_ABNORMAL_PENIS_MORPHOLOGY		453	0.219594	1.01537	0.361446	1	1	1331	tags=13%, list=11%, signal=14%
GSE11961_MEMORY_BCELL_DAY7_VS_PLASMA_CELL_DAY7_UP	GSE11961_MEMORY_BCELL_DAY7_VS_PLASMA_CELL_DAY7_UP		166	0.243036	1.01512	0.438775	1	1	2099	tags=23%, list=18%, signal=28%
HP_RIDGED_NAIL	HP_RIDGED_NAIL		17	0.376594	1.01489	0.4425	1	1	1883	tags=29%, list=16%, signal=35%
GOMF_TRANSLATION_REGULATOR_ACTIVITY	GOMF_TRANSLATION_REGULATOR_ACTIVITY		105	0.25939	1.01488	0.413534	1	1	2152	tags=28%, list=18%, signal=33%
GSE13493_CD4INTCD8POS_VS_CD8POS_THYMOCYTE_UP	GSE13493_CD4INTCD8POS_VS_CD8POS_THYMOCYTE_UP		155	0.255817	1.01484	0.428571	1	1	2571	tags=29%, list=22%, signal=37%
GOBP_REGULATION_OF_CELL_MORPHOGENESIS_INVOLVED_IN_DIFFERENTIATION	GOBP_REGULATION_OF_CELL_MORPHOGENESIS_INVOLVED_IN_DIFFERENTIATION		75	0.285807	1.01483	0.387543	1	1	1611	tags=19%, list=14%, signal=21%
HP_CONTRACTURES_INVOLVING_THE_JOINTS_OF_THE_FEET	HP_CONTRACTURES_INVOLVING_THE_JOINTS_OF_THE_FEET		53	0.2995	1.01464	0.427729	1	1	828	tags=8%, list=7%, signal=8%
GOBP_MITOCHONDRIAL_TRANSPORT	GOBP_MITOCHONDRIAL_TRANSPORT		212	0.23815	1.01443	0.427027	1	1	1758	tags=19%, list=15%, signal=22%
HOFT_CD4_POSITIVE_ALPHA_BETA_MEMORY_T_CELL_BCG_VACCINE_AGE_18_45YO_ID_56D_TOP_100_DEG_AFTER_IN_VITRO_RE_STIMULATION_DN	HOFT_CD4_POSITIVE_ALPHA_BETA_MEMORY_T_CELL_BCG_VACCINE_AGE_18_45YO_ID_56D_TOP_100_DEG_AFTER_IN_VITRO_RE_STIMULATION_DN		34	0.324728	1.01405	0.421488	1	1	2348	tags=32%, list=20%, signal=40%
HP_ABNORMAL_VISUAL_ELECTROPHYSIOLOGY	HP_ABNORMAL_VISUAL_ELECTROPHYSIOLOGY		143	0.249131	1.01404	0.433333	1	1	1655	tags=16%, list=14%, signal=18%
GSE15930_NAIVE_VS_72H_IN_VITRO_STIM_TRICHOSTATINA_CD8_TCELL_DN	GSE15930_NAIVE_VS_72H_IN_VITRO_STIM_TRICHOSTATINA_CD8_TCELL_DN		171	0.239594	1.014	0.368159	1	1	2035	tags=20%, list=17%, signal=24%
HP_PROGRESSIVE_NIGHT_BLINDNESS	HP_PROGRESSIVE_NIGHT_BLINDNESS		50	0.299076	1.0138	0.432507	1	1	2098	tags=26%, list=18%, signal=31%
GOBP_ALCOHOL_BIOSYNTHETIC_PROCESS	GOBP_ALCOHOL_BIOSYNTHETIC_PROCESS		115	0.259205	1.01376	0.457143	1	1	1400	tags=14%, list=12%, signal=16%
HP_ABNORMAL_PELVIS_BONE_MORPHOLOGY	HP_ABNORMAL_PELVIS_BONE_MORPHOLOGY		19	0.375811	1.01375	0.434466	1	1	3226	tags=37%, list=27%, signal=51%
HP_PREMATURE_OVARIAN_INSUFFICIENCY	HP_PREMATURE_OVARIAN_INSUFFICIENCY		47	0.302137	1.01371	0.442424	1	1	2092	tags=28%, list=18%, signal=33%
GOMF_CYCLIN_BINDING	GOMF_CYCLIN_BINDING		25	0.351522	1.01319	0.433511	1	1	883	tags=16%, list=7%, signal=17%
HOFT_CD4_POSITIVE_ALPHA_BETA_MEMORY_T_CELL_BCG_VACCINE_AGE_18_45YO_56D_TOP_100_DEG_AFTER_IN_VITRO_RE_STIMULATION_UP	HOFT_CD4_POSITIVE_ALPHA_BETA_MEMORY_T_CELL_BCG_VACCINE_AGE_18_45YO_56D_TOP_100_DEG_AFTER_IN_VITRO_RE_STIMULATION_UP		16	0.38116	1.01307	0.4475	1	1	3057	tags=44%, list=26%, signal=59%
HP_ADDUCTED_THUMB	HP_ADDUCTED_THUMB		64	0.283351	1.01303	0.444795	1	1	277	tags=5%, list=2%, signal=5%
HP_CARPAL_SYNOSTOSIS	HP_CARPAL_SYNOSTOSIS		22	0.366415	1.01291	0.417476	1	1	1375	tags=27%, list=12%, signal=31%
GSE15330_HSC_VS_MEGAKARYOCYTE_ERYTHROID_PROGENITOR_UP	GSE15330_HSC_VS_MEGAKARYOCYTE_ERYTHROID_PROGENITOR_UP		138	0.252627	1.01286	0.390946	1	1	2590	tags=31%, list=22%, signal=39%
GSE17721_0.5H_VS_12H_POLYIC_BMDC_UP	GSE17721_0.5H_VS_12H_POLYIC_BMDC_UP		154	0.247175	1.01232	0.448276	1	1	2709	tags=29%, list=23%, signal=37%
GOMF_PRENYLTRANSFERASE_ACTIVITY	GOMF_PRENYLTRANSFERASE_ACTIVITY		16	0.388601	1.01231	0.449275	1	1	846	tags=19%, list=7%, signal=20%
GOMF_HORMONE_RECEPTOR_BINDING	GOMF_HORMONE_RECEPTOR_BINDING		135	0.251965	1.01215	0.418699	1	1	1226	tags=11%, list=10%, signal=12%
GOBP_TRANSFERRIN_TRANSPORT	GOBP_TRANSFERRIN_TRANSPORT		26	0.349562	1.0118	0.439898	1	1	4	tags=4%, list=0%, signal=4%
GSE15930_STIM_VS_STIM_AND_TRICHOSTATINA_24H_CD8_T_CELL_UP	GSE15930_STIM_VS_STIM_AND_TRICHOSTATINA_24H_CD8_T_CELL_UP		127	0.256414	1.01169	0.440476	1	1	369	tags=6%, list=3%, signal=6%
GOBP_HISTONE_EXCHANGE	GOBP_HISTONE_EXCHANGE		31	0.326598	1.01042	0.417949	1	1	3606	tags=48%, list=31%, signal=69%
HP_CONGENITAL_HYPOTHYROIDISM	HP_CONGENITAL_HYPOTHYROIDISM		17	0.379633	1.01024	0.451306	1	1	2973	tags=47%, list=25%, signal=63%
GOBP_ACTIN_MEDIATED_CELL_CONTRACTION	GOBP_ACTIN_MEDIATED_CELL_CONTRACTION		69	0.28274	1.00996	0.432177	1	1	870	tags=14%, list=7%, signal=16%
GOBP_STEM_CELL_PROLIFERATION	GOBP_STEM_CELL_PROLIFERATION		45	0.304893	1.00993	0.450425	1	1	214	tags=9%, list=2%, signal=9%
GOBP_RESPONSE_TO_GLUCAGON	GOBP_RESPONSE_TO_GLUCAGON		24	0.346478	1.00986	0.439206	1	1	685	tags=13%, list=6%, signal=13%
GSE13887_RESTING_VS_NO_TREATED_CD4_TCELL_DN	GSE13887_RESTING_VS_NO_TREATED_CD4_TCELL_DN		77	0.272652	1.0098	0.405316	1	1	1704	tags=21%, list=14%, signal=24%
GSE2706_UNSTIM_VS_8H_LPS_DC_UP	GSE2706_UNSTIM_VS_8H_LPS_DC_UP		158	0.247353	1.00856	0.415	1	1	2885	tags=34%, list=24%, signal=44%
GOBP_CELLULAR_RESPONSE_TO_IONIZING_RADIATION	GOBP_CELLULAR_RESPONSE_TO_IONIZING_RADIATION		56	0.292922	1.00836	0.419558	1	1	2917	tags=34%, list=25%, signal=45%
HP_HYPERACTIVE_DEEP_TENDON_REFLEXES	HP_HYPERACTIVE_DEEP_TENDON_REFLEXES		25	0.34517	1.00785	0.450402	1	1	1693	tags=24%, list=14%, signal=28%
HP_COXA_VARA	HP_COXA_VARA		46	0.305136	1.00773	0.420118	1	1	1633	tags=22%, list=14%, signal=25%
HP_ABNORMAL_EPIPHYSEAL_OSSIFICATION	HP_ABNORMAL_EPIPHYSEAL_OSSIFICATION		39	0.30859	1.00745	0.453258	1	1	569	tags=10%, list=5%, signal=11%
GSE17186_MEMORY_VS_CD21LOW_TRANSITIONAL_BCELL_DN	GSE17186_MEMORY_VS_CD21LOW_TRANSITIONAL_BCELL_DN		163	0.242753	1.00682	0.423077	1	1	1517	tags=16%, list=13%, signal=18%
GOBP_MITOTIC_CYTOKINETIC_PROCESS	GOBP_MITOTIC_CYTOKINETIC_PROCESS		17	0.390696	1.00653	0.454545	1	1	2992	tags=41%, list=25%, signal=55%
HP_APLASIA_HYPOPLASIA_INVOLVING_BONES_OF_THE_THORAX	HP_APLASIA_HYPOPLASIA_INVOLVING_BONES_OF_THE_THORAX		116	0.261305	1.00641	0.420849	1	1	1439	tags=17%, list=12%, signal=19%
GOCC_PLASMA_MEMBRANE_BOUNDED_CELL_PROJECTION_CYTOPLASM	GOCC_PLASMA_MEMBRANE_BOUNDED_CELL_PROJECTION_CYTOPLASM		140	0.256698	1.006	0.390698	1	1	2578	tags=34%, list=22%, signal=43%
GSE15930_NAIVE_VS_24H_IN_VITRO_STIM_INFAB_CD8_TCELL_DN	GSE15930_NAIVE_VS_24H_IN_VITRO_STIM_INFAB_CD8_TCELL_DN		174	0.238458	1.00586	0.477778	1	1	2838	tags=25%, list=24%, signal=33%
HP_PELVIC_KIDNEY	HP_PELVIC_KIDNEY		18	0.379892	1.00577	0.439506	1	1	27	tags=6%, list=0%, signal=6%
HP_MACROGYRIA	HP_MACROGYRIA		19	0.371465	1.00553	0.431472	1	1	957	tags=16%, list=8%, signal=17%
GOCC_DYNEIN_COMPLEX	GOCC_DYNEIN_COMPLEX		32	0.329534	1.00508	0.426065	1	1	2499	tags=38%, list=21%, signal=47%
GOBP_CELLULAR_RESPIRATION	GOBP_CELLULAR_RESPIRATION		148	0.250858	1.00506	0.414847	1	1	2243	tags=20%, list=19%, signal=25%
HP_ADVANCED_ERUPTION_OF_TEETH	HP_ADVANCED_ERUPTION_OF_TEETH		32	0.32855	1.00501	0.459103	1	1	1430	tags=19%, list=12%, signal=21%
HP_RETINAL_DYSPLASIA	HP_RETINAL_DYSPLASIA		20	0.359516	1.00499	0.460621	1	1	277	tags=10%, list=2%, signal=10%
GSE2405_HEAT_KILLED_VS_LIVE_A_PHAGOCYTOPHILUM_STIM_NEUTROPHIL_9H_UP	GSE2405_HEAT_KILLED_VS_LIVE_A_PHAGOCYTOPHILUM_STIM_NEUTROPHIL_9H_UP		153	0.24882	1.00495	0.467593	1	1	2175	tags=23%, list=18%, signal=28%
HP_HYPOPLASTIC_ILIA	HP_HYPOPLASTIC_ILIA		36	0.321833	1.00486	0.433048	1	1	1593	tags=17%, list=13%, signal=19%
GOBP_SMOOTHENED_SIGNALING_PATHWAY	GOBP_SMOOTHENED_SIGNALING_PATHWAY		104	0.259345	1.00373	0.452381	1	1	2990	tags=33%, list=25%, signal=43%
GSE14308_NAIVE_CD4_TCELL_VS_NATURAL_TREG_UP	GSE14308_NAIVE_CD4_TCELL_VS_NATURAL_TREG_UP		136	0.253773	1.00352	0.429204	1	1	3262	tags=34%, list=28%, signal=46%
GSE40493_BCL6_KO_VS_WT_TREG_UP	GSE40493_BCL6_KO_VS_WT_TREG_UP		154	0.245083	1.00349	0.441964	1	1	2771	tags=25%, list=23%, signal=33%
GSE17721_POLYIC_VS_GARDIQUIMOD_0.5H_BMDC_UP	GSE17721_POLYIC_VS_GARDIQUIMOD_0.5H_BMDC_UP		128	0.251589	1.0032	0.418327	1	1	1635	tags=16%, list=14%, signal=19%
GOBP_REGULATION_OF_MRNA_PROCESSING	GOBP_REGULATION_OF_MRNA_PROCESSING		109	0.252937	1.00298	0.432	1	1	4481	tags=39%, list=38%, signal=62%
GSE14415_ACT_VS_CTRL_NATURAL_TREG_UP	GSE14415_ACT_VS_CTRL_NATURAL_TREG_UP		151	0.242576	1.00279	0.401747	1	1	2017	tags=23%, list=17%, signal=28%
GOBP_COLLAGEN_FIBRIL_ORGANIZATION	GOBP_COLLAGEN_FIBRIL_ORGANIZATION		46	0.292236	1.00199	0.476331	1	1	347	tags=11%, list=3%, signal=11%
GSE1112_OT1_CD8AB_VS_HY_CD8AA_THYMOCYTE_RTOC_CULTURE_DN	GSE1112_OT1_CD8AB_VS_HY_CD8AA_THYMOCYTE_RTOC_CULTURE_DN		120	0.25522	1.00126	0.447876	1	1	1980	tags=22%, list=17%, signal=26%
HP_ABNORMALITY_OF_PERIAURICULAR_REGION	HP_ABNORMALITY_OF_PERIAURICULAR_REGION		70	0.290239	1.00113	0.434164	1	1	1306	tags=17%, list=11%, signal=19%
GSE17721_PAM3CSK4_VS_GADIQUIMOD_24H_BMDC_UP	GSE17721_PAM3CSK4_VS_GADIQUIMOD_24H_BMDC_UP		147	0.247542	1.00054	0.451219	1	1	1884	tags=22%, list=16%, signal=26%
GSE39820_TGFBETA1_VS_TGFBETA3_IN_IL6_TREATED_CD4_TCELL_DN	GSE39820_TGFBETA1_VS_TGFBETA3_IN_IL6_TREATED_CD4_TCELL_DN		133	0.243282	1.0004	0.472727	1	1	1790	tags=20%, list=15%, signal=23%
GOBP_PROTEIN_CONTAINING_COMPLEX_DISASSEMBLY	GOBP_PROTEIN_CONTAINING_COMPLEX_DISASSEMBLY		264	0.229397	1.00027	0.472868	1	1	2630	tags=27%, list=22%, signal=34%
GOBP_PYRIDINE_CONTAINING_COMPOUND_METABOLIC_PROCESS	GOBP_PYRIDINE_CONTAINING_COMPOUND_METABOLIC_PROCESS		27	0.34297	1.00027	0.448549	1	1	690	tags=19%, list=6%, signal=20%
BCAT.100_UP.V1_DN	BCAT.100_UP.V1_DN		18	0.371519	1.00017	0.47561	1	1	2384	tags=50%, list=20%, signal=63%
GSE21360_SECONDARY_VS_TERTIARY_MEMORY_CD8_TCELL_UP	GSE21360_SECONDARY_VS_TERTIARY_MEMORY_CD8_TCELL_UP		171	0.242009	0.999915	0.426136	1	1	3362	tags=33%, list=28%, signal=46%
GSE24634_TREG_VS_TCONV_POST_DAY5_IL4_CONVERSION_UP	GSE24634_TREG_VS_TCONV_POST_DAY5_IL4_CONVERSION_UP		169	0.248776	0.999814	0.44086	1	1	2948	tags=30%, list=25%, signal=40%
HP_ABNORMAL_TRICUSPID_VALVE_MORPHOLOGY	HP_ABNORMAL_TRICUSPID_VALVE_MORPHOLOGY		30	0.335452	0.999287	0.448864	1	1	769	tags=10%, list=7%, signal=11%
GOBP_ATRIAL_SEPTUM_DEVELOPMENT	GOBP_ATRIAL_SEPTUM_DEVELOPMENT		16	0.385228	0.999119	0.440678	1	1	50	tags=6%, list=0%, signal=6%
GSE15735_CTRL_VS_HDAC_INHIBITOR_TREATED_CD4_TCELL_12H_UP	GSE15735_CTRL_VS_HDAC_INHIBITOR_TREATED_CD4_TCELL_12H_UP		158	0.243759	0.999036	0.455882	1	1	1572	tags=16%, list=13%, signal=18%
GOBP_DETERMINATION_OF_ADULT_LIFESPAN	GOBP_DETERMINATION_OF_ADULT_LIFESPAN		15	0.382892	0.998793	0.441463	1	1	2164	tags=27%, list=18%, signal=33%
GSE17721_0.5H_VS_8H_POLYIC_BMDC_UP	GSE17721_0.5H_VS_8H_POLYIC_BMDC_UP		159	0.243969	0.998781	0.459459	1	1	2418	tags=25%, list=20%, signal=31%
THAKAR_PBMC_INACTIVATED_INFLUENZA_AGE_70PLS_NONRESPONDER_2DY_UP	THAKAR_PBMC_INACTIVATED_INFLUENZA_AGE_70PLS_NONRESPONDER_2DY_UP		96	0.257252	0.998702	0.453875	1	1	2270	tags=23%, list=19%, signal=28%
GSE24726_WT_VS_E2_2_KO_PDC_DAY6_POST_DELETION_UP	GSE24726_WT_VS_E2_2_KO_PDC_DAY6_POST_DELETION_UP		168	0.241117	0.998633	0.431818	1	1	2811	tags=27%, list=24%, signal=35%
GOBP_POSITIVE_REGULATION_OF_RESPONSE_TO_DNA_DAMAGE_STIMULUS	GOBP_POSITIVE_REGULATION_OF_RESPONSE_TO_DNA_DAMAGE_STIMULUS		88	0.2652	0.998565	0.438662	1	1	2675	tags=28%, list=23%, signal=36%
GSE13887_HEALTHY_VS_LUPUS_RESTING_CD4_TCELL_DN	GSE13887_HEALTHY_VS_LUPUS_RESTING_CD4_TCELL_DN		88	0.267653	0.997746	0.428571	1	1	2243	tags=22%, list=19%, signal=26%
HP_PALLOR	HP_PALLOR		96	0.258815	0.99766	0.440476	1	1	1503	tags=21%, list=13%, signal=24%
HP_EXERCISE_INTOLERANCE	HP_EXERCISE_INTOLERANCE		68	0.279146	0.997512	0.464407	1	1	3229	tags=31%, list=27%, signal=42%
HP_ABNORMALITY_OF_REPRODUCTIVE_SYSTEM_PHYSIOLOGY	HP_ABNORMALITY_OF_REPRODUCTIVE_SYSTEM_PHYSIOLOGY		461	0.218103	0.997226	0.487179	1	1	2198	tags=21%, list=19%, signal=25%
GOBP_PROTEIN_ACETYLATION	GOBP_PROTEIN_ACETYLATION		161	0.245218	0.997106	0.481818	1	1	2746	tags=24%, list=23%, signal=30%
GOBP_CARTILAGE_DEVELOPMENT_INVOLVED_IN_ENDOCHONDRAL_BONE_MORPHOGENESIS	GOBP_CARTILAGE_DEVELOPMENT_INVOLVED_IN_ENDOCHONDRAL_BONE_MORPHOGENESIS		17	0.381798	0.995995	0.464467	1	1	801	tags=18%, list=7%, signal=19%
GOBP_RESPONSE_TO_IMMOBILIZATION_STRESS	GOBP_RESPONSE_TO_IMMOBILIZATION_STRESS		15	0.397006	0.995965	0.444717	1	1	37	tags=7%, list=0%, signal=7%
GOBP_PHYSIOLOGICAL_CARDIAC_MUSCLE_HYPERTROPHY	GOBP_PHYSIOLOGICAL_CARDIAC_MUSCLE_HYPERTROPHY		20	0.36355	0.995935	0.465011	1	1	264	tags=10%, list=2%, signal=10%
GOMF_HEME_COPPER_TERMINAL_OXIDASE_ACTIVITY	GOMF_HEME_COPPER_TERMINAL_OXIDASE_ACTIVITY		16	0.382059	0.995867	0.448198	1	1	3326	tags=38%, list=28%, signal=52%
GSE37534_PIOGLITAZONE_VS_ROSIGLITAZONE_TREATED_CD4_TCELL_PPARG1_FOXP3_TRANSDUCED_DN	GSE37534_PIOGLITAZONE_VS_ROSIGLITAZONE_TREATED_CD4_TCELL_PPARG1_FOXP3_TRANSDUCED_DN		123	0.250253	0.995826	0.492188	1	1	1637	tags=21%, list=14%, signal=24%
GSE11961_MEMORY_BCELL_DAY7_VS_MEMORY_BCELL_DAY40_DN	GSE11961_MEMORY_BCELL_DAY7_VS_MEMORY_BCELL_DAY40_DN		153	0.242692	0.995621	0.444444	1	1	1412	tags=16%, list=12%, signal=18%
GSE4142_PLASMA_CELL_VS_GC_BCELL_UP	GSE4142_PLASMA_CELL_VS_GC_BCELL_UP		152	0.242526	0.995587	0.492958	1	1	2545	tags=25%, list=22%, signal=31%
HP_ABNORMALITY_OF_THE_TONGUE	HP_ABNORMALITY_OF_THE_TONGUE		246	0.230236	0.995374	0.452381	1	1	2849	tags=28%, list=24%, signal=37%
GOBP_SYNAPTIC_TRANSMISSION_GABAERGIC	GOBP_SYNAPTIC_TRANSMISSION_GABAERGIC		15	0.393543	0.995195	0.472422	1	1	197	tags=13%, list=2%, signal=14%
GSE23505_IL6_IL1_VS_IL6_IL1_TGFB_TREATED_CD4_TCELL_UP	GSE23505_IL6_IL1_VS_IL6_IL1_TGFB_TREATED_CD4_TCELL_UP		158	0.24514	0.995135	0.507463	1	1	1276	tags=16%, list=11%, signal=18%
GOBP_NUCLEOBASE_CONTAINING_SMALL_MOLECULE_BIOSYNTHETIC_PROCESS	GOBP_NUCLEOBASE_CONTAINING_SMALL_MOLECULE_BIOSYNTHETIC_PROCESS		89	0.261421	0.995091	0.492754	1	1	1730	tags=24%, list=15%, signal=27%
GSE27786_NEUTROPHIL_VS_MONO_MAC_DN	GSE27786_NEUTROPHIL_VS_MONO_MAC_DN		165	0.243219	0.994938	0.461187	1	1	2966	tags=31%, list=25%, signal=41%
HP_MELANOMA	HP_MELANOMA		57	0.2907	0.994881	0.466238	1	1	996	tags=19%, list=8%, signal=21%
GOBP_REGULATION_OF_PLATELET_AGGREGATION	GOBP_REGULATION_OF_PLATELET_AGGREGATION		16	0.385696	0.994762	0.464286	1	1	679	tags=19%, list=6%, signal=20%
HP_WEAK_CRY	HP_WEAK_CRY		27	0.340631	0.994698	0.450495	1	1	2154	tags=26%, list=18%, signal=32%
HP_ANKLE_FLEXION_CONTRACTURE	HP_ANKLE_FLEXION_CONTRACTURE		33	0.32573	0.994587	0.445623	1	1	3353	tags=42%, list=28%, signal=59%
HP_GLAUCOMA	HP_GLAUCOMA		223	0.233248	0.994404	0.41573	1	1	2395	tags=25%, list=20%, signal=30%
GSE25502_WT_VS_KLF13_KO_THYMIC_MEMORY_LIKE_CD8_TCELL_DN	GSE25502_WT_VS_KLF13_KO_THYMIC_MEMORY_LIKE_CD8_TCELL_DN		76	0.268551	0.994243	0.405405	1	1	517	tags=11%, list=4%, signal=11%
GSE2405_0H_VS_9H_A_PHAGOCYTOPHILUM_STIM_NEUTROPHIL_UP	GSE2405_0H_VS_9H_A_PHAGOCYTOPHILUM_STIM_NEUTROPHIL_UP		128	0.248308	0.993893	0.461538	1	1	1855	tags=20%, list=16%, signal=24%
GSE26928_NAIVE_VS_EFF_MEMORY_CD4_TCELL_UP	GSE26928_NAIVE_VS_EFF_MEMORY_CD4_TCELL_UP		140	0.249507	0.993837	0.456897	1	1	1613	tags=22%, list=14%, signal=25%
GSE7509_FCGRIIB_VS_TNFA_IL1B_IL6_PGE_STIM_DC_DN	GSE7509_FCGRIIB_VS_TNFA_IL1B_IL6_PGE_STIM_DC_DN		105	0.258717	0.993788	0.468635	1	1	2319	tags=27%, list=20%, signal=33%
HALLMARK_OXIDATIVE_PHOSPHORYLATION	HALLMARK_OXIDATIVE_PHOSPHORYLATION		166	0.243467	0.993514	0.507109	1	1	2565	tags=23%, list=22%, signal=30%
GOBP_ORGANIC_HYDROXY_COMPOUND_BIOSYNTHETIC_PROCESS	GOBP_ORGANIC_HYDROXY_COMPOUND_BIOSYNTHETIC_PROCESS		169	0.242283	0.993371	0.425339	1	1	1400	tags=15%, list=12%, signal=17%
GOBP_ATP_BIOSYNTHETIC_PROCESS	GOBP_ATP_BIOSYNTHETIC_PROCESS		35	0.315961	0.993295	0.46	1	1	1909	tags=26%, list=16%, signal=31%
GOBP_CELLULAR_RESPONSE_TO_RETINOIC_ACID	GOBP_CELLULAR_RESPONSE_TO_RETINOIC_ACID		43	0.304533	0.992918	0.472222	1	1	698	tags=16%, list=6%, signal=17%
GOMF_CELL_ADHESION_MEDIATOR_ACTIVITY	GOMF_CELL_ADHESION_MEDIATOR_ACTIVITY		43	0.302539	0.992663	0.481268	1	1	494	tags=12%, list=4%, signal=12%
GSE22443_NAIVE_VS_ACT_AND_IL12_TREATED_CD8_TCELL_DN	GSE22443_NAIVE_VS_ACT_AND_IL12_TREATED_CD8_TCELL_DN		159	0.239693	0.992087	0.479263	1	1	1674	tags=18%, list=14%, signal=20%
GOBP_METHYLATION	GOBP_METHYLATION		267	0.226419	0.991897	0.497041	1	1	2973	tags=30%, list=25%, signal=40%
ALK_DN.V1_DN	ALK_DN.V1_DN		59	0.282808	0.991755	0.474576	1	1	832	tags=19%, list=7%, signal=20%
GOBP_MITOTIC_CELL_CYCLE_ARREST	GOBP_MITOTIC_CELL_CYCLE_ARREST		15	0.3914	0.991746	0.464198	1	1	902	tags=27%, list=8%, signal=29%
HP_VAGINAL_FISTULA	HP_VAGINAL_FISTULA		16	0.37674	0.991549	0.472222	1	1	2448	tags=44%, list=21%, signal=55%
HP_LARGE_BASAL_GANGLIA	HP_LARGE_BASAL_GANGLIA		38	0.303617	0.991471	0.460177	1	1	480	tags=8%, list=4%, signal=8%
GOBP_PEPTIDE_HORMONE_SECRETION	GOBP_PEPTIDE_HORMONE_SECRETION		147	0.24793	0.991207	0.470588	1	1	878	tags=12%, list=7%, signal=13%
HP_THORACIC_SCOLIOSIS	HP_THORACIC_SCOLIOSIS		31	0.326932	0.991149	0.468031	1	1	1602	tags=23%, list=14%, signal=26%
GSE40666_STAT1_KO_VS_STAT4_KO_CD8_TCELL_UP	GSE40666_STAT1_KO_VS_STAT4_KO_CD8_TCELL_UP		164	0.24197	0.990396	0.485714	1	1	4168	tags=42%, list=35%, signal=64%
PGF_UP.V1_UP	PGF_UP.V1_UP		165	0.239063	0.990307	0.471698	1	1	1580	tags=16%, list=13%, signal=18%
GSE17974_CTRL_VS_ACT_IL4_AND_ANTI_IL12_48H_CD4_TCELL_DN	GSE17974_CTRL_VS_ACT_IL4_AND_ANTI_IL12_48H_CD4_TCELL_DN		162	0.242374	0.989489	0.439394	1	1	2275	tags=23%, list=19%, signal=29%
HP_ENCEPHALOCELE	HP_ENCEPHALOCELE		82	0.268444	0.988776	0.472603	1	1	1272	tags=20%, list=11%, signal=22%
HP_CONGENITAL_SENSORINEURAL_HEARING_IMPAIRMENT	HP_CONGENITAL_SENSORINEURAL_HEARING_IMPAIRMENT		25	0.340094	0.988571	0.44757	1	1	603	tags=20%, list=5%, signal=21%
GOBP_NCRNA_TRANSCRIPTION	GOBP_NCRNA_TRANSCRIPTION		97	0.259041	0.988175	0.461017	1	1	4242	tags=41%, list=36%, signal=64%
HP_HYDROPS_FETALIS	HP_HYDROPS_FETALIS		70	0.276839	0.987304	0.400709	1	1	2026	tags=27%, list=17%, signal=33%
HP_ABNORMAL_INTERNAL_GENITALIA	HP_ABNORMAL_INTERNAL_GENITALIA		357	0.2201	0.987265	0.50505	1	1	2490	tags=22%, list=21%, signal=27%
HP_ABNORMAL_CARTILAGE_MORPHOLOGY	HP_ABNORMAL_CARTILAGE_MORPHOLOGY		32	0.319086	0.986911	0.450135	1	1	1284	tags=19%, list=11%, signal=21%
HP_TRACHEOESOPHAGEAL_FISTULA	HP_TRACHEOESOPHAGEAL_FISTULA		57	0.280127	0.986621	0.451411	1	1	2253	tags=30%, list=19%, signal=37%
HP_PROGEROID_FACIAL_APPEARANCE	HP_PROGEROID_FACIAL_APPEARANCE		16	0.36922	0.986391	0.483791	1	1	4160	tags=56%, list=35%, signal=87%
GSE14308_TH1_VS_NATURAL_TREG_UP	GSE14308_TH1_VS_NATURAL_TREG_UP		155	0.242531	0.986387	0.455959	1	1	2628	tags=27%, list=22%, signal=34%
HP_ABNORMAL_CONSUMPTION_BEHAVIOR	HP_ABNORMAL_CONSUMPTION_BEHAVIOR		72	0.275746	0.986314	0.483553	1	1	1440	tags=22%, list=12%, signal=25%
GOBP_ESTABLISHMENT_OF_PROTEIN_LOCALIZATION_TO_ORGANELLE	GOBP_ESTABLISHMENT_OF_PROTEIN_LOCALIZATION_TO_ORGANELLE		413	0.216852	0.985917	0.5	1	1	2731	tags=26%, list=23%, signal=33%
GOBP_KERATAN_SULFATE_METABOLIC_PROCESS	GOBP_KERATAN_SULFATE_METABOLIC_PROCESS		24	0.344502	0.98552	0.496241	1	1	2186	tags=33%, list=19%, signal=41%
HP_PEDAL_EDEMA	HP_PEDAL_EDEMA		25	0.340255	0.985313	0.455764	1	1	183	tags=8%, list=2%, signal=8%
GSE26928_NAIVE_VS_CENT_MEMORY_CD4_TCELL_UP	GSE26928_NAIVE_VS_CENT_MEMORY_CD4_TCELL_UP		138	0.246638	0.985161	0.508929	1	1	1102	tags=12%, list=9%, signal=13%
GSE411_UNSTIM_VS_400MIN_IL6_STIM_SOCS3_KO_MACROPHAGE_UP	GSE411_UNSTIM_VS_400MIN_IL6_STIM_SOCS3_KO_MACROPHAGE_UP		163	0.238993	0.985126	0.485849	1	1	2414	tags=26%, list=20%, signal=33%
GOBP_MULTIVESICULAR_BODY_ORGANIZATION	GOBP_MULTIVESICULAR_BODY_ORGANIZATION		24	0.338243	0.984977	0.486911	1	1	3811	tags=42%, list=32%, signal=61%
GOBP_CHROMATIN_REMODELING_AT_CENTROMERE	GOBP_CHROMATIN_REMODELING_AT_CENTROMERE		27	0.33569	0.984321	0.492147	1	1	3606	tags=56%, list=31%, signal=80%
GSE24210_RESTING_TREG_VS_TCONV_DN	GSE24210_RESTING_TREG_VS_TCONV_DN		170	0.238691	0.98417	0.476923	1	1	1899	tags=21%, list=16%, signal=24%
GSE19888_ADENOSINE_A3R_ACT_VS_A3R_ACT_WITH_A3R_INH_PRETREATMENT_IN_MAST_CELL_UP	GSE19888_ADENOSINE_A3R_ACT_VS_A3R_ACT_WITH_A3R_INH_PRETREATMENT_IN_MAST_CELL_UP		153	0.240736	0.984137	0.479821	1	1	2812	tags=29%, list=24%, signal=38%
GOBP_PEROXISOMAL_MEMBRANE_TRANSPORT	GOBP_PEROXISOMAL_MEMBRANE_TRANSPORT		15	0.382227	0.983433	0.465721	1	1	3157	tags=53%, list=27%, signal=73%
GOBP_ARP2_3_COMPLEX_MEDIATED_ACTIN_NUCLEATION	GOBP_ARP2_3_COMPLEX_MEDIATED_ACTIN_NUCLEATION		31	0.325711	0.983384	0.458333	1	1	2748	tags=32%, list=23%, signal=42%
GOCC_REPLICATION_FORK	GOCC_REPLICATION_FORK		55	0.284128	0.983223	0.458824	1	1	3815	tags=44%, list=32%, signal=64%
GOBP_HISTONE_MRNA_METABOLIC_PROCESS	GOBP_HISTONE_MRNA_METABOLIC_PROCESS		18	0.373737	0.982661	0.490338	1	1	2594	tags=28%, list=22%, signal=36%
GOBP_TRANSCRIPTION_INITIATION_FROM_RNA_POLYMERASE_II_PROMOTER	GOBP_TRANSCRIPTION_INITIATION_FROM_RNA_POLYMERASE_II_PROMOTER		145	0.239492	0.982228	0.495652	1	1	1984	tags=19%, list=17%, signal=23%
GOMF_TUBULIN_BINDING	GOMF_TUBULIN_BINDING		280	0.224285	0.982214	0.507246	1	1	1681	tags=18%, list=14%, signal=20%
GSE25088_CTRL_VS_IL4_AND_ROSIGLITAZONE_STIM_STAT6_KO_MACROPHAGE_UP	GSE25088_CTRL_VS_IL4_AND_ROSIGLITAZONE_STIM_STAT6_KO_MACROPHAGE_UP		157	0.241648	0.981401	0.502488	1	1	1835	tags=20%, list=16%, signal=24%
HP_VISUAL_FIELD_DEFECT	HP_VISUAL_FIELD_DEFECT		137	0.250317	0.980919	0.502304	1	1	2770	tags=27%, list=23%, signal=35%
HP_HYPOGONADISM	HP_HYPOGONADISM		262	0.225757	0.980837	0.507937	1	1	2185	tags=20%, list=18%, signal=24%
GSE34156_UNTREATED_VS_24H_NOD2_LIGAND_TREATED_MONOCYTE_UP	GSE34156_UNTREATED_VS_24H_NOD2_LIGAND_TREATED_MONOCYTE_UP		106	0.253095	0.980804	0.528302	1	1	1518	tags=23%, list=13%, signal=26%
GOMF_GLYCOLIPID_BINDING	GOMF_GLYCOLIPID_BINDING		19	0.363725	0.980667	0.496471	1	1	1082	tags=26%, list=9%, signal=29%
HP_ABNORMALITY_OF_THE_NASAL_DORSUM	HP_ABNORMALITY_OF_THE_NASAL_DORSUM		162	0.23971	0.980506	0.488889	1	1	1474	tags=15%, list=12%, signal=17%
HP_ABNORMAL_VENTRICULAR_SEPTUM_MORPHOLOGY	HP_ABNORMAL_VENTRICULAR_SEPTUM_MORPHOLOGY		311	0.221478	0.980429	0.53913	1	1	2558	tags=22%, list=22%, signal=28%
GOBP_REGULATION_OF_GENE_SILENCING	GOBP_REGULATION_OF_GENE_SILENCING		89	0.264937	0.980377	0.501887	1	1	2383	tags=21%, list=20%, signal=27%
GSE41867_DAY8_EFFECTOR_VS_DAY30_MEMORY_CD8_TCELL_LCMV_ARMSTRONG_UP	GSE41867_DAY8_EFFECTOR_VS_DAY30_MEMORY_CD8_TCELL_LCMV_ARMSTRONG_UP		171	0.235199	0.980353	0.475962	1	1	2836	tags=24%, list=24%, signal=31%
HP_ABNORMALITY_OF_BRAINSTEM_MORPHOLOGY	HP_ABNORMALITY_OF_BRAINSTEM_MORPHOLOGY		182	0.229809	0.980057	0.51462	1	1	2412	tags=24%, list=20%, signal=29%
HP_HYPOKINESIA	HP_HYPOKINESIA		25	0.342686	0.979787	0.471053	1	1	2500	tags=28%, list=21%, signal=35%
HP_SIDEROBLASTIC_ANEMIA	HP_SIDEROBLASTIC_ANEMIA		32	0.318192	0.97958	0.472376	1	1	3463	tags=44%, list=29%, signal=62%
GSE26928_EFF_MEMORY_VS_CXCR5_POS_CD4_TCELL_DN	GSE26928_EFF_MEMORY_VS_CXCR5_POS_CD4_TCELL_DN		132	0.247744	0.979171	0.5	1	1	1152	tags=12%, list=10%, signal=13%
GOMF_STEROID_HORMONE_RECEPTOR_ACTIVITY	GOMF_STEROID_HORMONE_RECEPTOR_ACTIVITY		18	0.372836	0.978951	0.465558	1	1	952	tags=22%, list=8%, signal=24%
GSE17721_LPS_VS_PAM3CSK4_8H_BMDC_DN	GSE17721_LPS_VS_PAM3CSK4_8H_BMDC_DN		159	0.23581	0.978877	0.515464	1	1	2617	tags=28%, list=22%, signal=35%
GOMF_3_5_DNA_HELICASE_ACTIVITY	GOMF_3_5_DNA_HELICASE_ACTIVITY		16	0.375943	0.9787	0.486076	1	1	7377	tags=100%, list=62%, signal=266%
HP_ABNORMAL_LUNG_LOBATION	HP_ABNORMAL_LUNG_LOBATION		31	0.3277	0.978595	0.490251	1	1	2386	tags=23%, list=20%, signal=28%
HP_OPHTHALMOPARESIS	HP_OPHTHALMOPARESIS		187	0.235189	0.978387	0.508475	1	1	2307	tags=22%, list=20%, signal=27%
GSE43955_10H_VS_60H_ACT_CD4_TCELL_UP	GSE43955_10H_VS_60H_ACT_CD4_TCELL_UP		151	0.243321	0.978207	0.495536	1	1	1472	tags=13%, list=12%, signal=15%
GSE10239_MEMORY_VS_KLRG1INT_EFF_CD8_TCELL_UP	GSE10239_MEMORY_VS_KLRG1INT_EFF_CD8_TCELL_UP		130	0.247272	0.977795	0.542986	1	1	2928	tags=32%, list=25%, signal=42%
GSE40274_FOXP3_VS_FOXP3_AND_XBP1_TRANSDUCED_ACTIVATED_CD4_TCELL_UP	GSE40274_FOXP3_VS_FOXP3_AND_XBP1_TRANSDUCED_ACTIVATED_CD4_TCELL_UP		88	0.261359	0.976868	0.498208	1	1	2251	tags=33%, list=19%, signal=40%
HP_HYPOPLASIA_OF_PENIS	HP_HYPOPLASIA_OF_PENIS		294	0.221588	0.976216	0.57554	1	1	1331	tags=13%, list=11%, signal=14%
HP_CLITORAL_HYPOPLASIA	HP_CLITORAL_HYPOPLASIA		23	0.340931	0.975286	0.477941	1	1	2987	tags=35%, list=25%, signal=46%
GOMF_PHOSPHATIDYLINOSITOL_3_5_BISPHOSPHATE_BINDING	GOMF_PHOSPHATIDYLINOSITOL_3_5_BISPHOSPHATE_BINDING		23	0.340753	0.974981	0.47	1	1	414	tags=9%, list=4%, signal=9%
GOBP_NEGATIVE_REGULATION_OF_PROTEIN_POLYMERIZATION	GOBP_NEGATIVE_REGULATION_OF_PROTEIN_POLYMERIZATION		55	0.274977	0.973771	0.509554	1	1	1311	tags=18%, list=11%, signal=20%
GSE26928_CENTR_MEMORY_VS_CXCR5_POS_CD4_TCELL_UP	GSE26928_CENTR_MEMORY_VS_CXCR5_POS_CD4_TCELL_UP		113	0.250569	0.973743	0.529183	1	1	1385	tags=15%, list=12%, signal=17%
GOBP_CATECHOL_CONTAINING_COMPOUND_METABOLIC_PROCESS	GOBP_CATECHOL_CONTAINING_COMPOUND_METABOLIC_PROCESS		25	0.340181	0.973624	0.480418	1	1	557	tags=12%, list=5%, signal=13%
GOBP_MRNA_MODIFICATION	GOBP_MRNA_MODIFICATION		22	0.346463	0.973575	0.469974	1	1	4058	tags=41%, list=34%, signal=62%
GOBP_FATTY_ACID_DERIVATIVE_BIOSYNTHETIC_PROCESS	GOBP_FATTY_ACID_DERIVATIVE_BIOSYNTHETIC_PROCESS		42	0.301778	0.973541	0.505181	1	1	1589	tags=24%, list=13%, signal=27%
GSE41978_WT_VS_ID2_KO_AND_BIM_KO_KLRG1_LOW_EFFECTOR_CD8_TCELL_UP	GSE41978_WT_VS_ID2_KO_AND_BIM_KO_KLRG1_LOW_EFFECTOR_CD8_TCELL_UP		154	0.239141	0.973314	0.544186	1	1	2139	tags=24%, list=18%, signal=29%
GSE16386_IL4_VS_IL4_AND_ROSIGLITAZONE_STIM_MACROPHAGE_6H_UP	GSE16386_IL4_VS_IL4_AND_ROSIGLITAZONE_STIM_MACROPHAGE_6H_UP		170	0.238192	0.972563	0.556701	1	1	3809	tags=36%, list=32%, signal=52%
GOBP_MEMBRANE_REPOLARIZATION	GOBP_MEMBRANE_REPOLARIZATION		24	0.340045	0.972186	0.481752	1	1	870	tags=21%, list=7%, signal=22%
GSE40685_NAIVE_CD4_TCELL_VS_FOXP3_KO_TREG_PRECURSOR_DN	GSE40685_NAIVE_CD4_TCELL_VS_FOXP3_KO_TREG_PRECURSOR_DN		128	0.242755	0.972166	0.52381	1	1	1441	tags=17%, list=12%, signal=19%
GOBP_PROTEIN_K11_LINKED_UBIQUITINATION	GOBP_PROTEIN_K11_LINKED_UBIQUITINATION		22	0.344935	0.971963	0.498753	1	1	1313	tags=18%, list=11%, signal=20%
GOBP_LIPID_STORAGE	GOBP_LIPID_STORAGE		65	0.27516	0.971839	0.489583	1	1	295	tags=6%, list=2%, signal=6%
GOBP_CELL_CYCLE_G2_M_PHASE_TRANSITION	GOBP_CELL_CYCLE_G2_M_PHASE_TRANSITION		235	0.227436	0.97144	0.57047	1	1	3623	tags=33%, list=31%, signal=47%
GSE11961_MEMORY_BCELL_DAY40_VS_GERMINAL_CENTER_BCELL_DAY40_UP	GSE11961_MEMORY_BCELL_DAY40_VS_GERMINAL_CENTER_BCELL_DAY40_UP		143	0.243517	0.970444	0.515695	1	1	1103	tags=11%, list=9%, signal=12%
GOBP_PYRIMIDINE_NUCLEOTIDE_BIOSYNTHETIC_PROCESS	GOBP_PYRIMIDINE_NUCLEOTIDE_BIOSYNTHETIC_PROCESS		16	0.375005	0.970318	0.498835	1	1	3236	tags=50%, list=27%, signal=69%
HP_ABNORMAL_RETICULOCYTE_MORPHOLOGY	HP_ABNORMAL_RETICULOCYTE_MORPHOLOGY		46	0.290854	0.969903	0.517045	1	1	1191	tags=26%, list=10%, signal=29%
GSE5589_WT_VS_IL10_KO_LPS_AND_IL6_STIM_MACROPHAGE_45MIN_DN	GSE5589_WT_VS_IL10_KO_LPS_AND_IL6_STIM_MACROPHAGE_45MIN_DN		133	0.24305	0.969781	0.504386	1	1	1566	tags=14%, list=13%, signal=16%
HP_ABNORMAL_URETER_PHYSIOLOGY	HP_ABNORMAL_URETER_PHYSIOLOGY		136	0.237559	0.969348	0.552885	1	1	2506	tags=24%, list=21%, signal=30%
GOCC_MLL1_2_COMPLEX	GOCC_MLL1_2_COMPLEX		26	0.331701	0.968268	0.465347	1	1	4060	tags=42%, list=34%, signal=64%
HP_ADRENAL_INSUFFICIENCY	HP_ADRENAL_INSUFFICIENCY		64	0.276619	0.968221	0.521595	1	1	2386	tags=27%, list=20%, signal=33%
GOBP_INSULIN_SECRETION	GOBP_INSULIN_SECRETION		128	0.241088	0.968075	0.544681	1	1	878	tags=13%, list=7%, signal=13%
GOBP_NEGATIVE_REGULATION_OF_CELL_AGING	GOBP_NEGATIVE_REGULATION_OF_CELL_AGING		15	0.370923	0.967108	0.50358	1	1	1146	tags=27%, list=10%, signal=29%
GSE21670_UNTREATED_VS_TGFB_IL6_TREATED_CD4_TCELL_UP	GSE21670_UNTREATED_VS_TGFB_IL6_TREATED_CD4_TCELL_UP		170	0.232058	0.966781	0.584699	1	1	2668	tags=29%, list=23%, signal=37%
HP_APLASIA_HYPOPLASIA_OF_FINGERS	HP_APLASIA_HYPOPLASIA_OF_FINGERS		249	0.226045	0.966027	0.596273	1	1	1439	tags=14%, list=12%, signal=16%
HP_BREECH_PRESENTATION	HP_BREECH_PRESENTATION		15	0.383349	0.966004	0.494505	1	1	1602	tags=20%, list=14%, signal=23%
GOBP_DNA_DEPENDENT_DNA_REPLICATION_MAINTENANCE_OF_FIDELITY	GOBP_DNA_DEPENDENT_DNA_REPLICATION_MAINTENANCE_OF_FIDELITY		41	0.294882	0.965624	0.501425	1	1	3816	tags=46%, list=32%, signal=68%
GSE557_WT_VS_CIITA_KO_DC_UP	GSE557_WT_VS_CIITA_KO_DC_UP		162	0.235845	0.965405	0.560606	1	1	2618	tags=31%, list=22%, signal=39%
GSE25087_FETAL_VS_ADULT_TCONV_DN	GSE25087_FETAL_VS_ADULT_TCONV_DN		126	0.243921	0.965228	0.559829	1	1	2209	tags=25%, list=19%, signal=30%
HP_FETAL_DISTRESS	HP_FETAL_DISTRESS		38	0.295654	0.964805	0.521277	1	1	2412	tags=34%, list=20%, signal=43%
HP_ATTENUATION_OF_RETINAL_BLOOD_VESSELS	HP_ATTENUATION_OF_RETINAL_BLOOD_VESSELS		21	0.336781	0.964455	0.507812	1	1	3040	tags=33%, list=26%, signal=45%
GOCC_SITE_OF_DOUBLE_STRAND_BREAK	GOCC_SITE_OF_DOUBLE_STRAND_BREAK		57	0.272124	0.964349	0.513513	1	1	2584	tags=33%, list=22%, signal=42%
GOBP_VIRAL_TRANSLATION	GOBP_VIRAL_TRANSLATION		16	0.371111	0.96419	0.487528	1	1	2449	tags=31%, list=21%, signal=39%
GSE2585_THYMIC_DC_VS_MTEC_UP	GSE2585_THYMIC_DC_VS_MTEC_UP		132	0.244352	0.963794	0.537445	1	1	1849	tags=19%, list=16%, signal=22%
GSE17974_0H_VS_6H_IN_VITRO_ACT_CD4_TCELL_DN	GSE17974_0H_VS_6H_IN_VITRO_ACT_CD4_TCELL_DN		173	0.229079	0.963585	0.565217	1	1	1795	tags=21%, list=15%, signal=24%
HP_CLUBBING_OF_TOES	HP_CLUBBING_OF_TOES		28	0.323558	0.963489	0.524064	1	1	3135	tags=39%, list=27%, signal=53%
GOBP_REGULATION_OF_DOUBLE_STRAND_BREAK_REPAIR_VIA_NONHOMOLOGOUS_END_JOINING	GOBP_REGULATION_OF_DOUBLE_STRAND_BREAK_REPAIR_VIA_NONHOMOLOGOUS_END_JOINING		21	0.350989	0.963295	0.498701	1	1	2529	tags=33%, list=21%, signal=42%
GSE22432_PDC_VS_TGFB1_TREATEDCOMMON_DC_PROGENITOR_UP	GSE22432_PDC_VS_TGFB1_TREATEDCOMMON_DC_PROGENITOR_UP		164	0.232873	0.963153	0.505	1	1	3525	tags=34%, list=30%, signal=48%
GOMF_EXOPEPTIDASE_ACTIVITY	GOMF_EXOPEPTIDASE_ACTIVITY		71	0.266395	0.963145	0.493243	1	1	930	tags=13%, list=8%, signal=14%
GSE14308_TH17_VS_NAIVE_CD4_TCELL_UP	GSE14308_TH17_VS_NAIVE_CD4_TCELL_UP		165	0.234984	0.96296	0.579787	1	1	2303	tags=21%, list=19%, signal=26%
HP_ACCELERATED_SKELETAL_MATURATION	HP_ACCELERATED_SKELETAL_MATURATION		53	0.277966	0.962844	0.509317	1	1	2539	tags=26%, list=21%, signal=33%
GSE369_SOCS3_KO_VS_WT_LIVER_POST_IL6_INJECTION_UP	GSE369_SOCS3_KO_VS_WT_LIVER_POST_IL6_INJECTION_UP		156	0.237854	0.962379	0.561086	1	1	1307	tags=18%, list=11%, signal=20%
GOBP_ESTABLISHMENT_OF_MITOCHONDRION_LOCALIZATION	GOBP_ESTABLISHMENT_OF_MITOCHONDRION_LOCALIZATION		20	0.355286	0.961428	0.506204	1	1	1889	tags=35%, list=16%, signal=42%
HP_PROSTATE_NEOPLASM	HP_PROSTATE_NEOPLASM		24	0.332841	0.961031	0.530806	1	1	1003	tags=25%, list=8%, signal=27%
GOBP_BLASTOCYST_GROWTH	GOBP_BLASTOCYST_GROWTH		16	0.362715	0.960977	0.52	1	1	1575	tags=19%, list=13%, signal=22%
GOBP_HISTONE_H2A_UBIQUITINATION	GOBP_HISTONE_H2A_UBIQUITINATION		24	0.333633	0.960942	0.528	1	1	2765	tags=33%, list=23%, signal=43%
GOBP_REGULATION_OF_STEROID_METABOLIC_PROCESS	GOBP_REGULATION_OF_STEROID_METABOLIC_PROCESS		85	0.262023	0.960802	0.538732	1	1	1400	tags=18%, list=12%, signal=20%
GSE25146_UNSTIM_VS_HELIOBACTER_PYLORI_LPS_STIM_AGS_CELL_UP	GSE25146_UNSTIM_VS_HELIOBACTER_PYLORI_LPS_STIM_AGS_CELL_UP		160	0.231497	0.960313	0.572139	1	1	3286	tags=31%, list=28%, signal=42%
GSE22033_UNTREATED_VS_ROSIGLITAZONE_TREATED_MEF_UP	GSE22033_UNTREATED_VS_ROSIGLITAZONE_TREATED_MEF_UP		171	0.232124	0.959865	0.562814	1	1	3394	tags=28%, list=29%, signal=39%
GOBP_PYRIMIDINE_CONTAINING_COMPOUND_BIOSYNTHETIC_PROCESS	GOBP_PYRIMIDINE_CONTAINING_COMPOUND_BIOSYNTHETIC_PROCESS		24	0.340949	0.959619	0.501393	1	1	3236	tags=46%, list=27%, signal=63%
GOMF_PEPTIDASE_ACTIVATOR_ACTIVITY_INVOLVED_IN_APOPTOTIC_PROCESS	GOMF_PEPTIDASE_ACTIVATOR_ACTIVITY_INVOLVED_IN_APOPTOTIC_PROCESS		15	0.38063	0.959174	0.518248	1	1	501	tags=20%, list=4%, signal=21%
GSE17974_0H_VS_72H_IN_VITRO_ACT_CD4_TCELL_DN	GSE17974_0H_VS_72H_IN_VITRO_ACT_CD4_TCELL_DN		162	0.231783	0.958891	0.584906	1	1	2024	tags=21%, list=17%, signal=25%
GOBP_RNA_PHOSPHODIESTER_BOND_HYDROLYSIS_ENDONUCLEOLYTIC	GOBP_RNA_PHOSPHODIESTER_BOND_HYDROLYSIS_ENDONUCLEOLYTIC		59	0.273375	0.957878	0.527331	1	1	3035	tags=39%, list=26%, signal=52%
GSE20152_HTNFA_OVERXPRESS_ANKLE_VS_CTRL_SPHK1_KO_ANKLE_DN	GSE20152_HTNFA_OVERXPRESS_ANKLE_VS_CTRL_SPHK1_KO_ANKLE_DN		130	0.239997	0.957841	0.570881	1	1	815	tags=8%, list=7%, signal=9%
GSE18791_CTRL_VS_NEWCASTLE_VIRUS_DC_16H_UP	GSE18791_CTRL_VS_NEWCASTLE_VIRUS_DC_16H_UP		174	0.225931	0.957631	0.59375	1	1	2851	tags=29%, list=24%, signal=38%
GSE17721_LPS_VS_GARDIQUIMOD_6H_BMDC_UP	GSE17721_LPS_VS_GARDIQUIMOD_6H_BMDC_UP		164	0.23131	0.957311	0.586207	1	1	1616	tags=17%, list=14%, signal=20%
GOBP_MITOCHONDRION_ORGANIZATION	GOBP_MITOCHONDRION_ORGANIZATION		439	0.208087	0.957065	0.666667	1	1	2313	tags=22%, list=20%, signal=26%
GOBP_POSITIVE_REGULATION_OF_CELL_CYCLE_G2_M_PHASE_TRANSITION	GOBP_POSITIVE_REGULATION_OF_CELL_CYCLE_G2_M_PHASE_TRANSITION		27	0.325957	0.956941	0.517333	1	1	2841	tags=26%, list=24%, signal=34%
GOBP_POSITIVE_REGULATION_OF_SYNAPTIC_TRANSMISSION	GOBP_POSITIVE_REGULATION_OF_SYNAPTIC_TRANSMISSION		80	0.258568	0.956861	0.572464	1	1	1340	tags=15%, list=11%, signal=17%
HP_ABNORMALITY_OF_THE_WRIST	HP_ABNORMALITY_OF_THE_WRIST		93	0.251559	0.956743	0.56705	1	1	1826	tags=19%, list=15%, signal=23%
GSE32986_UNSTIM_VS_GMCSF_STIM_DC_UP	GSE32986_UNSTIM_VS_GMCSF_STIM_DC_UP		140	0.240364	0.956174	0.58216	1	1	1643	tags=20%, list=14%, signal=23%
GOBP_NEGATIVE_REGULATION_OF_PROTEASOMAL_UBIQUITIN_DEPENDENT_PROTEIN_CATABOLIC_PROCESS	GOBP_NEGATIVE_REGULATION_OF_PROTEASOMAL_UBIQUITIN_DEPENDENT_PROTEIN_CATABOLIC_PROCESS		30	0.314667	0.955573	0.507389	1	1	2763	tags=30%, list=23%, signal=39%
HP_ABNORMAL_CIRCULATING_PROTEINOGENIC_AMINO_ACID_DERIVATIVE_CONCENTRATION	HP_ABNORMAL_CIRCULATING_PROTEINOGENIC_AMINO_ACID_DERIVATIVE_CONCENTRATION		42	0.294986	0.955562	0.527378	1	1	2482	tags=26%, list=21%, signal=33%
GOBP_NEGATIVE_REGULATION_OF_CHROMATIN_ORGANIZATION	GOBP_NEGATIVE_REGULATION_OF_CHROMATIN_ORGANIZATION		43	0.295309	0.955378	0.520588	1	1	2320	tags=28%, list=20%, signal=35%
HP_ABNORMAL_FULL_FIELD_ELECTRORETINOGRAM	HP_ABNORMAL_FULL_FIELD_ELECTRORETINOGRAM		27	0.320716	0.955032	0.514667	1	1	423	tags=11%, list=4%, signal=11%
GOBP_NUCLEAR_TRANSCRIBED_MRNA_CATABOLIC_PROCESS_EXONUCLEOLYTIC	GOBP_NUCLEAR_TRANSCRIBED_MRNA_CATABOLIC_PROCESS_EXONUCLEOLYTIC		31	0.315565	0.954908	0.533505	1	1	2108	tags=29%, list=18%, signal=35%
HP_TRACHEOMALACIA	HP_TRACHEOMALACIA		29	0.319824	0.954903	0.528796	1	1	2826	tags=34%, list=24%, signal=45%
HP_ABNORMAL_CIRCULATING_HORMONE_LEVEL	HP_ABNORMAL_CIRCULATING_HORMONE_LEVEL		272	0.220579	0.954216	0.609929	1	1	603	tags=8%, list=5%, signal=8%
GSE9960_GRAM_NEG_VS_GRAM_NEG_AND_POS_SEPSIS_PBMC_DN	GSE9960_GRAM_NEG_VS_GRAM_NEG_AND_POS_SEPSIS_PBMC_DN		148	0.233724	0.954175	0.529126	1	1	2807	tags=28%, list=24%, signal=37%
KEGG_ADIPOCYTOKINE_SIGNALING_PATHWAY	KEGG_ADIPOCYTOKINE_SIGNALING_PATHWAY		51	0.275138	0.954169	0.530547	1	1	295	tags=8%, list=2%, signal=8%
HP_ABNORMALITY_OF_HAIR_PIGMENTATION	HP_ABNORMALITY_OF_HAIR_PIGMENTATION		73	0.259101	0.954132	0.564263	1	1	1097	tags=14%, list=9%, signal=15%
GOBP_NEGATIVE_REGULATION_OF_SUPRAMOLECULAR_FIBER_ORGANIZATION	GOBP_NEGATIVE_REGULATION_OF_SUPRAMOLECULAR_FIBER_ORGANIZATION		116	0.249748	0.95406	0.560976	1	1	2185	tags=24%, list=18%, signal=29%
GOBP_PROTEIN_METHYLATION	GOBP_PROTEIN_METHYLATION		129	0.23931	0.953978	0.582222	1	1	3829	tags=35%, list=32%, signal=51%
HP_ABNORMAL_CSF_METABOLITE_LEVEL	HP_ABNORMAL_CSF_METABOLITE_LEVEL		92	0.253955	0.953936	0.541379	1	1	2542	tags=27%, list=22%, signal=34%
GOCC_GTPASE_COMPLEX	GOCC_GTPASE_COMPLEX		24	0.332617	0.9536	0.512376	1	1	1006	tags=21%, list=9%, signal=23%
HP_HYPOPLASTIC_FINGERNAIL	HP_HYPOPLASTIC_FINGERNAIL		34	0.304351	0.953399	0.5	1	1	403	tags=12%, list=3%, signal=12%
HP_CEREBRAL_WHITE_MATTER_ATROPHY	HP_CEREBRAL_WHITE_MATTER_ATROPHY		27	0.329396	0.95328	0.548718	1	1	3631	tags=41%, list=31%, signal=59%
GSE7459_UNTREATED_VS_IL6_TREATED_ACT_CD4_TCELL_UP	GSE7459_UNTREATED_VS_IL6_TREATED_ACT_CD4_TCELL_UP		95	0.248764	0.9532	0.583916	1	1	2497	tags=23%, list=21%, signal=29%
GOMF_ALCOHOL_BINDING	GOMF_ALCOHOL_BINDING		63	0.273154	0.952999	0.515924	1	1	976	tags=13%, list=8%, signal=14%
GOBP_ACTIN_NUCLEATION	GOBP_ACTIN_NUCLEATION		37	0.298146	0.952924	0.521368	1	1	3709	tags=41%, list=31%, signal=59%
GOMF_EXONUCLEASE_ACTIVITY_ACTIVE_WITH_EITHER_RIBO_OR_DEOXYRIBONUCLEIC_ACIDS_AND_PRODUCING_5_PHOSPHOMONOESTERS	GOMF_EXONUCLEASE_ACTIVITY_ACTIVE_WITH_EITHER_RIBO_OR_DEOXYRIBONUCLEIC_ACIDS_AND_PRODUCING_5_PHOSPHOMONOESTERS		54	0.276852	0.95287	0.538922	1	1	4214	tags=44%, list=36%, signal=69%
HP_ABNORMAL_ST_SEGMENT	HP_ABNORMAL_ST_SEGMENT		23	0.33382	0.952778	0.492308	1	1	870	tags=22%, list=7%, signal=23%
GOCC_FLEMMING_BODY	GOCC_FLEMMING_BODY		29	0.319956	0.952563	0.515385	1	1	3319	tags=34%, list=28%, signal=48%
HP_LARGE_FACE	HP_LARGE_FACE		198	0.227103	0.952051	0.625641	1	1	2574	tags=23%, list=22%, signal=29%
HP_ABNORMALITY_OF_THE_PULMONARY_VEINS	HP_ABNORMALITY_OF_THE_PULMONARY_VEINS		34	0.307319	0.951696	0.522788	1	1	990	tags=21%, list=8%, signal=22%
GSE2706_UNSTIM_VS_8H_LPS_AND_R848_DC_UP	GSE2706_UNSTIM_VS_8H_LPS_AND_R848_DC_UP		174	0.232146	0.951601	0.635417	1	1	2263	tags=23%, list=19%, signal=28%
HP_NATAL_TOOTH	HP_NATAL_TOOTH		26	0.330918	0.951538	0.498701	1	1	1430	tags=19%, list=12%, signal=22%
GSE2706_R848_VS_R848_AND_LPS_2H_STIM_DC_UP	GSE2706_R848_VS_R848_AND_LPS_2H_STIM_DC_UP		105	0.251116	0.951442	0.572052	1	1	2081	tags=20%, list=18%, signal=24%
GOBP_POSITIVE_REGULATION_OF_CELL_MORPHOGENESIS_INVOLVED_IN_DIFFERENTIATION	GOBP_POSITIVE_REGULATION_OF_CELL_MORPHOGENESIS_INVOLVED_IN_DIFFERENTIATION		61	0.271479	0.951136	0.541033	1	1	1611	tags=18%, list=14%, signal=21%
HP_RECURRENT_URINARY_TRACT_INFECTIONS	HP_RECURRENT_URINARY_TRACT_INFECTIONS		93	0.24848	0.951093	0.548263	1	1	2155	tags=20%, list=18%, signal=25%
GOBP_CELLULAR_GLUCOSE_HOMEOSTASIS	GOBP_CELLULAR_GLUCOSE_HOMEOSTASIS		91	0.253048	0.951048	0.573333	1	1	1436	tags=16%, list=12%, signal=19%
GSE26488_HDAC7_KO_VS_VP16_TRANSGENIC_HDAC7_KO_DOUBLE_POSITIVE_THYMOCYTE_UP	GSE26488_HDAC7_KO_VS_VP16_TRANSGENIC_HDAC7_KO_DOUBLE_POSITIVE_THYMOCYTE_UP		118	0.24133	0.95104	0.555102	1	1	2564	tags=31%, list=22%, signal=39%
GSE17721_POLYIC_VS_PAM3CSK4_24H_BMDC_DN	GSE17721_POLYIC_VS_PAM3CSK4_24H_BMDC_DN		167	0.229868	0.950133	0.589474	1	1	2214	tags=22%, list=19%, signal=27%
HP_OLIGOHYDRAMNIOS	HP_OLIGOHYDRAMNIOS		106	0.245651	0.94983	0.58871	1	1	1867	tags=18%, list=16%, signal=21%
GOMF_PROTON_CHANNEL_ACTIVITY	GOMF_PROTON_CHANNEL_ACTIVITY		17	0.35527	0.949775	0.521226	1	1	1742	tags=35%, list=15%, signal=41%
HP_HYPOPLASTIC_FEMALE_EXTERNAL_GENITALIA	HP_HYPOPLASTIC_FEMALE_EXTERNAL_GENITALIA		40	0.297885	0.9497	0.49422	1	1	3023	tags=33%, list=26%, signal=44%
GSE45365_HEALTHY_VS_MCMV_INFECTION_BCELL_IFNAR_KO_DN	GSE45365_HEALTHY_VS_MCMV_INFECTION_BCELL_IFNAR_KO_DN		139	0.23419	0.949256	0.561947	1	1	2591	tags=27%, list=22%, signal=34%
HP_APLASIA_HYPOPLASIA_OF_THE_UTERUS	HP_APLASIA_HYPOPLASIA_OF_THE_UTERUS		36	0.301126	0.948715	0.540786	1	1	2490	tags=25%, list=21%, signal=32%
GSE16385_ROSIGLITAZONE_IL4_VS_ROSIGLITAZONE_ALONE_STIM_MACROPHAGE_DN	GSE16385_ROSIGLITAZONE_IL4_VS_ROSIGLITAZONE_ALONE_STIM_MACROPHAGE_DN		160	0.227909	0.948335	0.590698	1	1	2977	tags=29%, list=25%, signal=39%
HP_LIMITED_ELBOW_EXTENSION	HP_LIMITED_ELBOW_EXTENSION		27	0.318963	0.947949	0.55163	1	1	1627	tags=19%, list=14%, signal=21%
GSE12366_GC_BCELL_VS_PLASMA_CELL_UP	GSE12366_GC_BCELL_VS_PLASMA_CELL_UP		160	0.226812	0.947674	0.635897	1	1	2902	tags=27%, list=25%, signal=35%
GOBP_HISTONE_H4_K16_ACETYLATION	GOBP_HISTONE_H4_K16_ACETYLATION		18	0.350114	0.947201	0.543424	1	1	3820	tags=39%, list=32%, signal=57%
HP_PROTUBERANT_ABDOMEN	HP_PROTUBERANT_ABDOMEN		20	0.338431	0.94687	0.532066	1	1	403	tags=15%, list=3%, signal=16%
GSE27786_LSK_VS_NEUTROPHIL_UP	GSE27786_LSK_VS_NEUTROPHIL_UP		173	0.22794	0.946787	0.605911	1	1	3014	tags=27%, list=26%, signal=36%
HP_PROGRESSIVE_CEREBELLAR_ATAXIA	HP_PROGRESSIVE_CEREBELLAR_ATAXIA		67	0.262423	0.9467	0.559006	1	1	3140	tags=31%, list=27%, signal=42%
GOBP_RIBONUCLEOSIDE_TRIPHOSPHATE_BIOSYNTHETIC_PROCESS	GOBP_RIBONUCLEOSIDE_TRIPHOSPHATE_BIOSYNTHETIC_PROCESS		45	0.286897	0.946389	0.545189	1	1	3622	tags=47%, list=31%, signal=67%
GOMF_DYNEIN_INTERMEDIATE_CHAIN_BINDING	GOMF_DYNEIN_INTERMEDIATE_CHAIN_BINDING		17	0.358132	0.946117	0.520482	1	1	1334	tags=29%, list=11%, signal=33%
GOBP_POSITIVE_REGULATION_OF_PEPTIDYL_THREONINE_PHOSPHORYLATION	GOBP_POSITIVE_REGULATION_OF_PEPTIDYL_THREONINE_PHOSPHORYLATION		24	0.32507	0.945786	0.537859	1	1	102	tags=8%, list=1%, signal=8%
GSE360_L_DONOVANI_VS_T_GONDII_DC_DN	GSE360_L_DONOVANI_VS_T_GONDII_DC_DN		136	0.234321	0.94564	0.626984	1	1	1199	tags=12%, list=10%, signal=13%
GSE21927_EL4_VS_MCA203_TUMOR_MONOCYTES_DN	GSE21927_EL4_VS_MCA203_TUMOR_MONOCYTES_DN		117	0.245156	0.945627	0.565041	1	1	1523	tags=20%, list=13%, signal=22%
HP_ABNORMAL_URINE_CARBOHYDRATE_LEVEL	HP_ABNORMAL_URINE_CARBOHYDRATE_LEVEL		16	0.365207	0.945518	0.55198	1	1	2755	tags=44%, list=23%, signal=57%
HP_CLUBBING	HP_CLUBBING		91	0.252388	0.945106	0.613475	1	1	2023	tags=26%, list=17%, signal=32%
HP_APLASIA_HYPOPLASIA_INVOLVING_THE_PELVIS	HP_APLASIA_HYPOPLASIA_INVOLVING_THE_PELVIS		49	0.28367	0.944988	0.535256	1	1	1866	tags=16%, list=16%, signal=19%
GOBP_REGULATION_OF_CENTRIOLE_REPLICATION	GOBP_REGULATION_OF_CENTRIOLE_REPLICATION		16	0.36764	0.944596	0.496259	1	1	891	tags=19%, list=8%, signal=20%
HP_ABNORMAL_RIB_CAGE_MORPHOLOGY	HP_ABNORMAL_RIB_CAGE_MORPHOLOGY		256	0.218568	0.944584	0.666667	1	1	1503	tags=15%, list=13%, signal=17%
GOCC_ROUGH_ENDOPLASMIC_RETICULUM_MEMBRANE	GOCC_ROUGH_ENDOPLASMIC_RETICULUM_MEMBRANE		19	0.356072	0.944465	0.53944	1	1	1139	tags=21%, list=10%, signal=23%
GOCC_COPI_COATED_VESICLE_MEMBRANE	GOCC_COPI_COATED_VESICLE_MEMBRANE		16	0.365344	0.944462	0.535176	1	1	1541	tags=19%, list=13%, signal=22%
GSE21033_1H_VS_24H_POLYIC_STIM_DC_DN	GSE21033_1H_VS_24H_POLYIC_STIM_DC_DN		130	0.236126	0.944462	0.641129	1	1	3046	tags=31%, list=26%, signal=41%
GOMF_RIBONUCLEASE_ACTIVITY	GOMF_RIBONUCLEASE_ACTIVITY		87	0.250506	0.944199	0.561837	1	1	3341	tags=37%, list=28%, signal=51%
GOBP_MITOCHONDRION_MORPHOGENESIS	GOBP_MITOCHONDRION_MORPHOGENESIS		17	0.358224	0.943672	0.5	1	1	2412	tags=29%, list=20%, signal=37%
HP_CEREBELLAR_VERMIS_ATROPHY	HP_CEREBELLAR_VERMIS_ATROPHY		21	0.340581	0.942945	0.539846	1	1	4284	tags=62%, list=36%, signal=97%
GOMF_ACTININ_BINDING	GOMF_ACTININ_BINDING		25	0.326133	0.942644	0.51597	1	1	827	tags=8%, list=7%, signal=9%
GOBP_LIPID_OXIDATION	GOBP_LIPID_OXIDATION		82	0.255617	0.942557	0.57197	1	1	2817	tags=30%, list=24%, signal=40%
GOBP_RNA_PHOSPHODIESTER_BOND_HYDROLYSIS	GOBP_RNA_PHOSPHODIESTER_BOND_HYDROLYSIS		118	0.239926	0.942531	0.618677	1	1	3341	tags=36%, list=28%, signal=49%
GOBP_DENDRITIC_SPINE_MAINTENANCE	GOBP_DENDRITIC_SPINE_MAINTENANCE		17	0.360999	0.942339	0.559902	1	1	2747	tags=41%, list=23%, signal=54%
HP_ABNORMAL_RIGHT_VENTRICLE_MORPHOLOGY	HP_ABNORMAL_RIGHT_VENTRICLE_MORPHOLOGY		24	0.332181	0.942081	0.524422	1	1	201	tags=8%, list=2%, signal=8%
HP_DISPROPORTIONATE_SHORT_LIMB_SHORT_STATURE	HP_DISPROPORTIONATE_SHORT_LIMB_SHORT_STATURE		68	0.261996	0.942044	0.584192	1	1	1324	tags=13%, list=11%, signal=15%
HP_OPTIC_DISC_PALLOR	HP_OPTIC_DISC_PALLOR		102	0.247042	0.941979	0.578182	1	1	2412	tags=24%, list=20%, signal=29%
GSE11961_GERMINAL_CENTER_BCELL_DAY7_VS_GERMINAL_CENTER_BCELL_DAY40_DN	GSE11961_GERMINAL_CENTER_BCELL_DAY7_VS_GERMINAL_CENTER_BCELL_DAY40_DN		157	0.228936	0.941906	0.632432	1	1	1653	tags=18%, list=14%, signal=20%
GOBP_REGULATION_OF_UBIQUITIN_PROTEIN_LIGASE_ACTIVITY	GOBP_REGULATION_OF_UBIQUITIN_PROTEIN_LIGASE_ACTIVITY		18	0.349321	0.94181	0.553957	1	1	1867	tags=28%, list=16%, signal=33%
GSE27786_LSK_VS_CD4_TCELL_UP	GSE27786_LSK_VS_CD4_TCELL_UP		163	0.227911	0.941748	0.602941	1	1	2178	tags=23%, list=18%, signal=28%
GSE21546_UNSTIM_VS_ANTI_CD3_STIM_ELK1_KO_DP_THYMOCYTES_DN	GSE21546_UNSTIM_VS_ANTI_CD3_STIM_ELK1_KO_DP_THYMOCYTES_DN		102	0.24647	0.941693	0.564748	1	1	1620	tags=22%, list=14%, signal=25%
GOBP_DNA_STRAND_ELONGATION	GOBP_DNA_STRAND_ELONGATION		23	0.335105	0.940925	0.526718	1	1	3970	tags=39%, list=34%, signal=59%
GSE29164_UNTREATED_VS_CD8_TCELL_TREATED_MELANOMA_DAY3_UP	GSE29164_UNTREATED_VS_CD8_TCELL_TREATED_MELANOMA_DAY3_UP		167	0.231294	0.940625	0.61413	1	1	2283	tags=22%, list=19%, signal=27%
GOBP_NEGATIVE_REGULATION_OF_CARDIAC_MUSCLE_TISSUE_GROWTH	GOBP_NEGATIVE_REGULATION_OF_CARDIAC_MUSCLE_TISSUE_GROWTH		17	0.350056	0.94062	0.52019	1	1	264	tags=12%, list=2%, signal=12%
GOBP_CHROMOSOME_LOCALIZATION	GOBP_CHROMOSOME_LOCALIZATION		65	0.26847	0.940396	0.591195	1	1	834	tags=8%, list=7%, signal=8%
GOMF_TRANSLATION_REPRESSOR_ACTIVITY	GOMF_TRANSLATION_REPRESSOR_ACTIVITY		18	0.349832	0.940273	0.546318	1	1	1881	tags=28%, list=16%, signal=33%
GOCC_ORGANELLE_ENVELOPE_LUMEN	GOCC_ORGANELLE_ENVELOPE_LUMEN		70	0.258069	0.940262	0.563574	1	1	3220	tags=37%, list=27%, signal=51%
KEGG_BIOSYNTHESIS_OF_UNSATURATED_FATTY_ACIDS	KEGG_BIOSYNTHESIS_OF_UNSATURATED_FATTY_ACIDS		18	0.351683	0.940261	0.539409	1	1	2091	tags=28%, list=18%, signal=34%
HP_HAND_MUSCLE_WEAKNESS	HP_HAND_MUSCLE_WEAKNESS		23	0.333141	0.940221	0.520681	1	1	1375	tags=26%, list=12%, signal=29%
HP_DISPROPORTIONATE_SHORT_STATURE	HP_DISPROPORTIONATE_SHORT_STATURE		89	0.248146	0.940211	0.608856	1	1	1627	tags=15%, list=14%, signal=17%
HP_NEOPLASM_OF_THE_PANCREAS	HP_NEOPLASM_OF_THE_PANCREAS		60	0.264123	0.939969	0.569492	1	1	2185	tags=25%, list=18%, signal=31%
HP_CONGENITAL_MALFORMATION_OF_THE_RIGHT_HEART	HP_CONGENITAL_MALFORMATION_OF_THE_RIGHT_HEART		41	0.288123	0.939772	0.55102	1	1	1779	tags=29%, list=15%, signal=34%
GSE3982_MAC_VS_NEUTROPHIL_LPS_STIM_UP	GSE3982_MAC_VS_NEUTROPHIL_LPS_STIM_UP		160	0.230406	0.939476	0.647619	1	1	2365	tags=24%, list=20%, signal=29%
GSE41867_DAY15_EFFECTOR_VS_DAY30_EXHAUSTED_CD8_TCELL_LCMV_CLONE13_DN	GSE41867_DAY15_EFFECTOR_VS_DAY30_EXHAUSTED_CD8_TCELL_LCMV_CLONE13_DN		173	0.225717	0.939471	0.681818	1	1	3814	tags=40%, list=32%, signal=58%
GSE5960_TH1_VS_ANERGIC_TH1_UP	GSE5960_TH1_VS_ANERGIC_TH1_UP		155	0.228768	0.939256	0.653333	1	1	2463	tags=26%, list=21%, signal=32%
HP_DENTAL_CROWDING	HP_DENTAL_CROWDING		74	0.261262	0.939077	0.594502	1	1	1912	tags=20%, list=16%, signal=24%
GSE6674_ANTI_IGM_VS_PL2_3_STIM_BCELL_UP	GSE6674_ANTI_IGM_VS_PL2_3_STIM_BCELL_UP		176	0.231563	0.938613	0.636364	1	1	2865	tags=30%, list=24%, signal=39%
GSE13485_CTRL_VS_DAY1_YF17D_VACCINE_PBMC_UP	GSE13485_CTRL_VS_DAY1_YF17D_VACCINE_PBMC_UP		166	0.223188	0.938312	0.674312	1	1	2695	tags=23%, list=23%, signal=29%
GOBP_PHOTORECEPTOR_CELL_MAINTENANCE	GOBP_PHOTORECEPTOR_CELL_MAINTENANCE		24	0.324708	0.938267	0.524675	1	1	1936	tags=29%, list=16%, signal=35%
HP_GENITAL_NEOPLASM	HP_GENITAL_NEOPLASM		110	0.24238	0.937938	0.619403	1	1	1118	tags=14%, list=9%, signal=15%
KEGG_SPLICEOSOME	KEGG_SPLICEOSOME		103	0.242947	0.937317	0.602317	1	1	3414	tags=35%, list=29%, signal=49%
HP_HYPOCALCEMIA	HP_HYPOCALCEMIA		52	0.278326	0.93717	0.58209	1	1	2575	tags=29%, list=22%, signal=37%
GSE3565_DUSP1_VS_WT_SPLENOCYTES_DN	GSE3565_DUSP1_VS_WT_SPLENOCYTES_DN		156	0.228601	0.937082	0.643192	1	1	1346	tags=19%, list=11%, signal=21%
HP_BOWING_OF_THE_LEGS	HP_BOWING_OF_THE_LEGS		151	0.230431	0.937051	0.661088	1	1	1633	tags=19%, list=14%, signal=21%
HP_NYCTALOPIA	HP_NYCTALOPIA		109	0.236447	0.937031	0.581395	1	1	2985	tags=29%, list=25%, signal=39%
GSE43863_NAIVE_VS_MEMORY_TH1_CD4_TCELL_D150_LCMV_DN	GSE43863_NAIVE_VS_MEMORY_TH1_CD4_TCELL_D150_LCMV_DN		84	0.250168	0.937019	0.598101	1	1	1310	tags=19%, list=11%, signal=21%
GSE17186_NAIVE_VS_CD21HIGH_TRANSITIONAL_BCELL_CORD_BLOOD_DN	GSE17186_NAIVE_VS_CD21HIGH_TRANSITIONAL_BCELL_CORD_BLOOD_DN		152	0.229107	0.936839	0.608911	1	1	1174	tags=13%, list=10%, signal=14%
GSE17721_CTRL_VS_LPS_8H_BMDC_UP	GSE17721_CTRL_VS_LPS_8H_BMDC_UP		173	0.227307	0.935764	0.640212	1	1	2639	tags=24%, list=22%, signal=31%
HP_SPARSE_OR_ABSENT_EYELASHES	HP_SPARSE_OR_ABSENT_EYELASHES		52	0.27663	0.935702	0.598039	1	1	1883	tags=27%, list=16%, signal=32%
HP_SPASTIC_TETRAPARESIS	HP_SPASTIC_TETRAPARESIS		45	0.277279	0.935406	0.557746	1	1	1715	tags=22%, list=15%, signal=26%
HP_ABNORMAL_FEMALE_REPRODUCTIVE_SYSTEM_PHYSIOLOGY	HP_ABNORMAL_FEMALE_REPRODUCTIVE_SYSTEM_PHYSIOLOGY		212	0.220919	0.935382	0.668449	1	1	2092	tags=19%, list=18%, signal=23%
GOBP_PEPTIDYL_LYSINE_DIMETHYLATION	GOBP_PEPTIDYL_LYSINE_DIMETHYLATION		18	0.351335	0.935221	0.535109	1	1	3829	tags=50%, list=32%, signal=74%
GOBP_KETONE_BIOSYNTHETIC_PROCESS	GOBP_KETONE_BIOSYNTHETIC_PROCESS		28	0.315111	0.934945	0.556675	1	1	2205	tags=29%, list=19%, signal=35%
GOBP_NEGATIVE_REGULATION_OF_DNA_RECOMBINATION	GOBP_NEGATIVE_REGULATION_OF_DNA_RECOMBINATION		32	0.306895	0.93475	0.52381	1	1	3548	tags=50%, list=30%, signal=71%
GSE44649_NAIVE_VS_ACTIVATED_CD8_TCELL_UP	GSE44649_NAIVE_VS_ACTIVATED_CD8_TCELL_UP		160	0.229396	0.934537	0.647059	1	1	3137	tags=32%, list=27%, signal=43%
GSE17721_CTRL_VS_CPG_1H_BMDC_UP	GSE17721_CTRL_VS_CPG_1H_BMDC_UP		164	0.225838	0.934106	0.64	1	1	2591	tags=22%, list=22%, signal=28%
GOBP_REGULATION_OF_CYCLASE_ACTIVITY	GOBP_REGULATION_OF_CYCLASE_ACTIVITY		21	0.326943	0.933511	0.547677	1	1	1234	tags=24%, list=10%, signal=27%
HP_SHORT_LONG_BONE	HP_SHORT_LONG_BONE		146	0.228289	0.932985	0.666667	1	1	2490	tags=25%, list=21%, signal=31%
GSE10325_LUPUS_BCELL_VS_LUPUS_MYELOID_UP	GSE10325_LUPUS_BCELL_VS_LUPUS_MYELOID_UP		155	0.226616	0.932912	0.625551	1	1	2320	tags=25%, list=20%, signal=31%
HP_ABNORMALITY_OF_THE_BREAST	HP_ABNORMALITY_OF_THE_BREAST		287	0.210753	0.932288	0.740458	1	1	1290	tags=12%, list=11%, signal=13%
HP_HORIZONTAL_NYSTAGMUS	HP_HORIZONTAL_NYSTAGMUS		42	0.290558	0.932188	0.564706	1	1	2144	tags=24%, list=18%, signal=29%
GOBP_G0_TO_G1_TRANSITION	GOBP_G0_TO_G1_TRANSITION		40	0.286669	0.931473	0.590258	1	1	3015	tags=33%, list=26%, signal=43%
HP_HYPOPHOSPHATEMIA	HP_HYPOPHOSPHATEMIA		32	0.304657	0.930985	0.543243	1	1	1503	tags=22%, list=13%, signal=25%
HP_ABNORMAL_CIRCULATING_NON_PROTEINOGENIC_AMINO_ACID_CONCENTRATION	HP_ABNORMAL_CIRCULATING_NON_PROTEINOGENIC_AMINO_ACID_CONCENTRATION		19	0.343191	0.930844	0.57385	1	1	450	tags=11%, list=4%, signal=11%
GSE14000_UNSTIM_VS_4H_LPS_DC_TRANSLATED_RNA_UP	GSE14000_UNSTIM_VS_4H_LPS_DC_TRANSLATED_RNA_UP		177	0.2228	0.930752	0.680203	1	1	3891	tags=41%, list=33%, signal=61%
HP_UPPER_LIMB_MUSCLE_WEAKNESS	HP_UPPER_LIMB_MUSCLE_WEAKNESS		53	0.279437	0.93073	0.604167	1	1	1377	tags=19%, list=12%, signal=21%
BCAT_GDS748_DN	BCAT_GDS748_DN		30	0.312433	0.930616	0.561644	1	1	1814	tags=27%, list=15%, signal=31%
GSE27786_LSK_VS_NEUTROPHIL_DN	GSE27786_LSK_VS_NEUTROPHIL_DN		128	0.231035	0.930486	0.642553	1	1	1834	tags=20%, list=16%, signal=24%
GOBP_REGULATION_OF_INTEGRIN_MEDIATED_SIGNALING_PATHWAY	GOBP_REGULATION_OF_INTEGRIN_MEDIATED_SIGNALING_PATHWAY		15	0.358121	0.93024	0.568807	1	1	679	tags=20%, list=6%, signal=21%
HP_OPTIC_NEUROPATHY	HP_OPTIC_NEUROPATHY		46	0.278376	0.930087	0.598291	1	1	2412	tags=26%, list=20%, signal=33%
GSE360_L_DONOVANI_VS_L_MAJOR_DC_UP	GSE360_L_DONOVANI_VS_L_MAJOR_DC_UP		143	0.234647	0.929861	0.658879	1	1	930	tags=13%, list=8%, signal=13%
GOBP_ORGANIC_CYCLIC_COMPOUND_CATABOLIC_PROCESS	GOBP_ORGANIC_CYCLIC_COMPOUND_CATABOLIC_PROCESS		463	0.202262	0.929837	0.786667	1	1	2108	tags=21%, list=18%, signal=25%
GOBP_PEPTIDYL_LYSINE_ACETYLATION	GOBP_PEPTIDYL_LYSINE_ACETYLATION		137	0.23238	0.929169	0.637209	1	1	2743	tags=23%, list=23%, signal=29%
HP_ABNORMAL_ANATOMIC_LOCATION_OF_THE_HEART	HP_ABNORMAL_ANATOMIC_LOCATION_OF_THE_HEART		75	0.251167	0.929156	0.637631	1	1	1937	tags=25%, list=16%, signal=30%
GOBP_REGULATION_OF_MITOCHONDRIAL_FISSION	GOBP_REGULATION_OF_MITOCHONDRIAL_FISSION		23	0.319874	0.929104	0.503722	1	1	1467	tags=17%, list=12%, signal=20%
GSE7852_THYMUS_VS_FAT_TREG_UP	GSE7852_THYMUS_VS_FAT_TREG_UP		171	0.220876	0.928908	0.678363	1	1	3358	tags=39%, list=28%, signal=53%
GOBP_CILIUM_OR_FLAGELLUM_DEPENDENT_CELL_MOTILITY	GOBP_CILIUM_OR_FLAGELLUM_DEPENDENT_CELL_MOTILITY		48	0.274738	0.928071	0.55493	1	1	911	tags=19%, list=8%, signal=20%
GOMF_SNARE_BINDING	GOMF_SNARE_BINDING		84	0.249412	0.928054	0.600733	1	1	2028	tags=21%, list=17%, signal=26%
HP_MICROCORNEA	HP_MICROCORNEA		93	0.243208	0.92805	0.626459	1	1	467	tags=6%, list=4%, signal=7%
GSE2405_0H_VS_12H_A_PHAGOCYTOPHILUM_STIM_NEUTROPHIL_DN	GSE2405_0H_VS_12H_A_PHAGOCYTOPHILUM_STIM_NEUTROPHIL_DN		151	0.225589	0.927087	0.688889	1	1	1708	tags=21%, list=14%, signal=24%
HP_ABNORMAL_HAND_MORPHOLOGY	HP_ABNORMAL_HAND_MORPHOLOGY		285	0.213256	0.926836	0.705479	1	1	1439	tags=14%, list=12%, signal=15%
HP_OVOID_VERTEBRAL_BODIES	HP_OVOID_VERTEBRAL_BODIES		25	0.321841	0.926616	0.574026	1	1	2769	tags=28%, list=23%, signal=36%
GOBP_VIRAL_RELEASE_FROM_HOST_CELL	GOBP_VIRAL_RELEASE_FROM_HOST_CELL		25	0.318793	0.926149	0.561856	1	1	1195	tags=16%, list=10%, signal=18%
HP_POOR_COORDINATION	HP_POOR_COORDINATION		23	0.320389	0.925689	0.546569	1	1	3295	tags=39%, list=28%, signal=54%
GOBP_PEROXISOMAL_TRANSPORT	GOBP_PEROXISOMAL_TRANSPORT		47	0.274527	0.92563	0.583587	1	1	3545	tags=43%, list=30%, signal=61%
GSE20366_CD103_POS_VS_NEG_TREG_KLRG1NEG_UP	GSE20366_CD103_POS_VS_NEG_TREG_KLRG1NEG_UP		109	0.239022	0.925085	0.651685	1	1	2265	tags=28%, list=19%, signal=34%
GSE17721_POLYIC_VS_CPG_0.5H_BMDC_DN	GSE17721_POLYIC_VS_CPG_0.5H_BMDC_DN		161	0.222904	0.924931	0.672043	1	1	2730	tags=27%, list=23%, signal=34%
GSE17721_POLYIC_VS_CPG_2H_BMDC_UP	GSE17721_POLYIC_VS_CPG_2H_BMDC_UP		177	0.222876	0.924861	0.70892	1	1	1562	tags=14%, list=13%, signal=15%
HP_APLASIA_HYPOPLASIA_OF_THE_EAR	HP_APLASIA_HYPOPLASIA_OF_THE_EAR		113	0.242245	0.924787	0.656652	1	1	2490	tags=26%, list=21%, signal=32%
GSE31622_WT_VS_KLF3_KO_BCELL_UP	GSE31622_WT_VS_KLF3_KO_BCELL_UP		143	0.230045	0.924452	0.634921	1	1	1596	tags=15%, list=14%, signal=17%
GSE14308_TH17_VS_INDUCED_TREG_UP	GSE14308_TH17_VS_INDUCED_TREG_UP		168	0.222814	0.923848	0.699029	1	1	1572	tags=14%, list=13%, signal=16%
GSE17186_NAIVE_VS_CD21HIGH_TRANSITIONAL_BCELL_CORD_BLOOD_UP	GSE17186_NAIVE_VS_CD21HIGH_TRANSITIONAL_BCELL_CORD_BLOOD_UP		172	0.223385	0.923335	0.69802	1	1	3188	tags=34%, list=27%, signal=46%
QI_PBMC_ZOSTAVAX_AGE_50_75YO_CORRELATED_WITH_EXPANSION_OF_VZV_SPECIFIC_T_CELLS_TO_PEAK_AT_1DY_NEGATIVE	QI_PBMC_ZOSTAVAX_AGE_50_75YO_CORRELATED_WITH_EXPANSION_OF_VZV_SPECIFIC_T_CELLS_TO_PEAK_AT_1DY_NEGATIVE		96	0.245606	0.922691	0.619048	1	1	1949	tags=30%, list=16%, signal=36%
GOBP_MEMBRANE_REPOLARIZATION_DURING_ACTION_POTENTIAL	GOBP_MEMBRANE_REPOLARIZATION_DURING_ACTION_POTENTIAL		15	0.359122	0.922186	0.545455	1	1	504	tags=20%, list=4%, signal=21%
GOBP_ADULT_BEHAVIOR	GOBP_ADULT_BEHAVIOR		65	0.256052	0.922022	0.622419	1	1	463	tags=9%, list=4%, signal=10%
HP_ABNORMAL_SCALP_MORPHOLOGY	HP_ABNORMAL_SCALP_MORPHOLOGY		259	0.211195	0.921517	0.707483	1	1	2193	tags=20%, list=19%, signal=24%
HP_ABNORMALITY_OF_URINE_CATECHOLAMINE_CONCENTRATION	HP_ABNORMALITY_OF_URINE_CATECHOLAMINE_CONCENTRATION		19	0.342939	0.921515	0.550117	1	1	1506	tags=26%, list=13%, signal=30%
GSE33292_DN3_THYMOCYTE_VS_TCELL_LYMPHOMA_FROM_TCF1_KO_UP	GSE33292_DN3_THYMOCYTE_VS_TCELL_LYMPHOMA_FROM_TCF1_KO_UP		148	0.226263	0.921504	0.687243	1	1	1417	tags=13%, list=12%, signal=14%
GSE3565_CTRL_VS_LPS_INJECTED_SPLENOCYTES_DN	GSE3565_CTRL_VS_LPS_INJECTED_SPLENOCYTES_DN		153	0.227113	0.921476	0.692982	1	1	2236	tags=27%, list=19%, signal=33%
GSE18791_CTRL_VS_NEWCASTLE_VIRUS_DC_14H_UP	GSE18791_CTRL_VS_NEWCASTLE_VIRUS_DC_14H_UP		167	0.219728	0.921442	0.678392	1	1	2801	tags=26%, list=24%, signal=34%
GSE37301_COMMON_LYMPHOID_PROGENITOR_VS_PRO_BCELL_DN	GSE37301_COMMON_LYMPHOID_PROGENITOR_VS_PRO_BCELL_DN		172	0.219547	0.921393	0.723005	1	1	1789	tags=16%, list=15%, signal=19%
GSE36392_EOSINOPHIL_VS_MAC_IL25_TREATED_LUNG_DN	GSE36392_EOSINOPHIL_VS_MAC_IL25_TREATED_LUNG_DN		172	0.217671	0.921194	0.650538	1	1	3955	tags=38%, list=33%, signal=56%
GSE45365_CD8A_DC_VS_CD11B_DC_DN	GSE45365_CD8A_DC_VS_CD11B_DC_DN		146	0.23024	0.920628	0.623256	1	1	2154	tags=25%, list=18%, signal=30%
GOBP_CARDIAC_ATRIUM_DEVELOPMENT	GOBP_CARDIAC_ATRIUM_DEVELOPMENT		26	0.307812	0.920535	0.58221	1	1	1254	tags=15%, list=11%, signal=17%
GSE17721_LPS_VS_GARDIQUIMOD_0.5H_BMDC_UP	GSE17721_LPS_VS_GARDIQUIMOD_0.5H_BMDC_UP		147	0.228545	0.920262	0.672199	1	1	2535	tags=27%, list=21%, signal=33%
GOBP_RESPONSE_TO_FOOD	GOBP_RESPONSE_TO_FOOD		15	0.363949	0.919955	0.577566	1	1	295	tags=13%, list=2%, signal=14%
GSE21380_NON_TFH_VS_GERMINAL_CENTER_TFH_CD4_TCELL_DN	GSE21380_NON_TFH_VS_GERMINAL_CENTER_TFH_CD4_TCELL_DN		170	0.218563	0.918775	0.72093	1	1	2192	tags=17%, list=19%, signal=21%
GOBP_VIRION_ASSEMBLY	GOBP_VIRION_ASSEMBLY		31	0.303281	0.918335	0.589005	1	1	3281	tags=35%, list=28%, signal=49%
GOBP_CEREBELLAR_PURKINJE_CELL_LAYER_DEVELOPMENT	GOBP_CEREBELLAR_PURKINJE_CELL_LAYER_DEVELOPMENT		16	0.351612	0.918242	0.561033	1	1	1906	tags=31%, list=16%, signal=37%
HP_BILATERAL_SENSORINEURAL_HEARING_IMPAIRMENT	HP_BILATERAL_SENSORINEURAL_HEARING_IMPAIRMENT		49	0.272041	0.918219	0.613924	1	1	4	tags=2%, list=0%, signal=2%
HP_POSTAXIAL_POLYDACTYLY	HP_POSTAXIAL_POLYDACTYLY		103	0.237784	0.918203	0.664122	1	1	3024	tags=33%, list=26%, signal=44%
GOBP_POSITIVE_REGULATION_OF_DOUBLE_STRAND_BREAK_REPAIR	GOBP_POSITIVE_REGULATION_OF_DOUBLE_STRAND_BREAK_REPAIR		34	0.290328	0.917664	0.591304	1	1	2529	tags=29%, list=21%, signal=37%
HP_ADRENAL_HYPOPLASIA	HP_ADRENAL_HYPOPLASIA		19	0.336236	0.91765	0.560197	1	1	37	tags=5%, list=0%, signal=5%
GSE16385_MONOCYTE_VS_12H_ROSIGLITAZONE_TREATED_MACROPHAGE_DN	GSE16385_MONOCYTE_VS_12H_ROSIGLITAZONE_TREATED_MACROPHAGE_DN		165	0.226784	0.917465	0.679803	1	1	3937	tags=39%, list=33%, signal=57%
HP_DEVELOPMENTAL_GLAUCOMA	HP_DEVELOPMENTAL_GLAUCOMA		43	0.281524	0.917315	0.584527	1	1	1284	tags=23%, list=11%, signal=26%
GSE16522_ANTI_CD3CD28_STIM_VS_UNSTIM_MEMORY_CD8_TCELL_DN	GSE16522_ANTI_CD3CD28_STIM_VS_UNSTIM_MEMORY_CD8_TCELL_DN		170	0.219638	0.917073	0.705556	1	1	3024	tags=32%, list=26%, signal=43%
GSE5542_IFNG_VS_IFNA_TREATED_EPITHELIAL_CELLS_6H_UP	GSE5542_IFNG_VS_IFNA_TREATED_EPITHELIAL_CELLS_6H_UP		171	0.222287	0.916833	0.736041	1	1	1652	tags=15%, list=14%, signal=17%
GSE13762_CTRL_VS_125_VITAMIND_DAY5_DC_DN	GSE13762_CTRL_VS_125_VITAMIND_DAY5_DC_DN		82	0.249881	0.916451	0.623616	1	1	2214	tags=29%, list=19%, signal=36%
HP_FRECKLING	HP_FRECKLING		35	0.29525	0.916041	0.594444	1	1	1312	tags=17%, list=11%, signal=19%
GOBP_MITOCHONDRIAL_CALCIUM_ION_HOMEOSTASIS	GOBP_MITOCHONDRIAL_CALCIUM_ION_HOMEOSTASIS		25	0.311647	0.916005	0.539846	1	1	2680	tags=32%, list=23%, signal=41%
HP_ABNORMALITY_OF_LIPOPROTEIN_CHOLESTEROL_CONCENTRATION	HP_ABNORMALITY_OF_LIPOPROTEIN_CHOLESTEROL_CONCENTRATION		34	0.294114	0.915757	0.590297	1	1	1225	tags=21%, list=10%, signal=23%
GOMF_PEPTIDASE_ACTIVATOR_ACTIVITY	GOMF_PEPTIDASE_ACTIVATOR_ACTIVITY		33	0.301793	0.91564	0.564171	1	1	501	tags=12%, list=4%, signal=13%
GSE13485_DAY3_VS_DAY7_YF17D_VACCINE_PBMC_UP	GSE13485_DAY3_VS_DAY7_YF17D_VACCINE_PBMC_UP		109	0.232195	0.915577	0.64794	1	1	1665	tags=18%, list=14%, signal=21%
GSE22432_UNTREATED_VS_TGFB1_TREATED_COMMON_DC_PROGENITOR_DN	GSE22432_UNTREATED_VS_TGFB1_TREATED_COMMON_DC_PROGENITOR_DN		169	0.222593	0.91547	0.694737	1	1	1955	tags=20%, list=17%, signal=23%
GSE7460_CTRL_VS_FOXP3_OVEREXPR_TCONV_UP	GSE7460_CTRL_VS_FOXP3_OVEREXPR_TCONV_UP		116	0.235962	0.915411	0.693878	1	1	3441	tags=37%, list=29%, signal=52%
GSE27786_LSK_VS_NKCELL_UP	GSE27786_LSK_VS_NKCELL_UP		167	0.223958	0.915146	0.688596	1	1	1036	tags=13%, list=9%, signal=14%
GSE41867_DAY15_EFFECTOR_VS_DAY30_MEMORY_CD8_TCELL_LCMV_ARMSTRONG_DN	GSE41867_DAY15_EFFECTOR_VS_DAY30_MEMORY_CD8_TCELL_LCMV_ARMSTRONG_DN		118	0.236762	0.915091	0.660633	1	1	1447	tags=15%, list=12%, signal=17%
HP_ABNORMAL_THUMB_MORPHOLOGY	HP_ABNORMAL_THUMB_MORPHOLOGY		266	0.21142	0.91505	0.776316	1	1	1701	tags=17%, list=14%, signal=19%
GSE11924_TH1_VS_TH2_CD4_TCELL_UP	GSE11924_TH1_VS_TH2_CD4_TCELL_UP		149	0.226311	0.914585	0.684444	1	1	875	tags=12%, list=7%, signal=13%
GOBP_REGULATION_OF_WATER_LOSS_VIA_SKIN	GOBP_REGULATION_OF_WATER_LOSS_VIA_SKIN		15	0.356561	0.914514	0.56974	1	1	971	tags=27%, list=8%, signal=29%
HP_UPSLANTED_PALPEBRAL_FISSURE	HP_UPSLANTED_PALPEBRAL_FISSURE		206	0.215558	0.914493	0.701031	1	1	2558	tags=22%, list=22%, signal=28%
GSE41867_DAY8_VS_DAY15_LCMV_ARMSTRONG_EFFECTOR_CD8_TCELL_UP	GSE41867_DAY8_VS_DAY15_LCMV_ARMSTRONG_EFFECTOR_CD8_TCELL_UP		76	0.24821	0.914421	0.659933	1	1	456	tags=8%, list=4%, signal=8%
GSE27786_LSK_VS_CD8_TCELL_DN	GSE27786_LSK_VS_CD8_TCELL_DN		161	0.221803	0.914106	0.753623	1	1	1949	tags=19%, list=16%, signal=23%
GOBP_RNA_PHOSPHODIESTER_BOND_HYDROLYSIS_EXONUCLEOLYTIC	GOBP_RNA_PHOSPHODIESTER_BOND_HYDROLYSIS_EXONUCLEOLYTIC		41	0.284621	0.914027	0.611594	1	1	4214	tags=46%, list=36%, signal=72%
HP_MACULAR_DEGENERATION	HP_MACULAR_DEGENERATION		50	0.271498	0.913874	0.616314	1	1	446	tags=10%, list=4%, signal=10%
HP_PULMONARY_ARTERY_ATRESIA	HP_PULMONARY_ARTERY_ATRESIA		15	0.359347	0.913865	0.58216	1	1	27	tags=7%, list=0%, signal=7%
GSE17721_CTRL_VS_CPG_8H_BMDC_UP	GSE17721_CTRL_VS_CPG_8H_BMDC_UP		171	0.220519	0.913581	0.704434	1	1	736	tags=8%, list=6%, signal=8%
HP_X_LINKED_DOMINANT_INHERITANCE	HP_X_LINKED_DOMINANT_INHERITANCE		50	0.27315	0.912654	0.591304	1	1	672	tags=6%, list=6%, signal=6%
GOBP_INNER_EAR_RECEPTOR_CELL_DEVELOPMENT	GOBP_INNER_EAR_RECEPTOR_CELL_DEVELOPMENT		24	0.314676	0.912203	0.559459	1	1	1685	tags=25%, list=14%, signal=29%
HP_OCULAR_ANTERIOR_SEGMENT_DYSGENESIS	HP_OCULAR_ANTERIOR_SEGMENT_DYSGENESIS		209	0.214424	0.912046	0.770492	1	1	2056	tags=20%, list=17%, signal=23%
HP_SHALLOW_ORBITS	HP_SHALLOW_ORBITS		22	0.319908	0.912045	0.591371	1	1	1805	tags=32%, list=15%, signal=37%
GOBP_NEGATIVE_REGULATION_OF_GENE_SILENCING	GOBP_NEGATIVE_REGULATION_OF_GENE_SILENCING		24	0.312057	0.911776	0.567204	1	1	2237	tags=38%, list=19%, signal=46%
GSE9239_CTRL_VS_TNF_INHIBITOR_TREATED_DC_UP	GSE9239_CTRL_VS_TNF_INHIBITOR_TREATED_DC_UP		144	0.222607	0.911538	0.668394	1	1	1718	tags=14%, list=15%, signal=16%
GOBP_STEROL_BIOSYNTHETIC_PROCESS	GOBP_STEROL_BIOSYNTHETIC_PROCESS		60	0.255824	0.911538	0.611111	1	1	1689	tags=15%, list=14%, signal=17%
GOBP_NUCLEOSIDE_PHOSPHATE_CATABOLIC_PROCESS	GOBP_NUCLEOSIDE_PHOSPHATE_CATABOLIC_PROCESS		65	0.258993	0.911478	0.646302	1	1	1730	tags=23%, list=15%, signal=27%
GOCC_TERMINAL_BOUTON	GOCC_TERMINAL_BOUTON		24	0.312159	0.910588	0.553191	1	1	755	tags=13%, list=6%, signal=13%
GSE1566_WT_VS_EZH2_KO_LN_TCELL_DN	GSE1566_WT_VS_EZH2_KO_LN_TCELL_DN		122	0.228665	0.909888	0.686992	1	1	2091	tags=20%, list=18%, signal=24%
GSE28237_FOLLICULAR_VS_LATE_GC_BCELL_UP	GSE28237_FOLLICULAR_VS_LATE_GC_BCELL_UP		131	0.227194	0.909679	0.689796	1	1	2270	tags=25%, list=19%, signal=31%
HP_ABNORMAL_CIRCULATING_CARBOHYDRATE_CONCENTRATION	HP_ABNORMAL_CIRCULATING_CARBOHYDRATE_CONCENTRATION		54	0.265384	0.909378	0.60625	1	1	2620	tags=30%, list=22%, signal=38%
GOBP_POSITIVE_REGULATION_OF_ATP_METABOLIC_PROCESS	GOBP_POSITIVE_REGULATION_OF_ATP_METABOLIC_PROCESS		29	0.298676	0.909162	0.592208	1	1	952	tags=17%, list=8%, signal=19%
GSE27786_BCELL_VS_ERYTHROBLAST_UP	GSE27786_BCELL_VS_ERYTHROBLAST_UP		167	0.219198	0.909139	0.70936	1	1	2303	tags=21%, list=19%, signal=26%
GSE20198_UNTREATED_VS_IL12_TREATED_ACT_CD4_TCELL_UP	GSE20198_UNTREATED_VS_IL12_TREATED_ACT_CD4_TCELL_UP		175	0.218865	0.909091	0.744493	1	1	2395	tags=23%, list=20%, signal=28%
KEGG_NICOTINATE_AND_NICOTINAMIDE_METABOLISM	KEGG_NICOTINATE_AND_NICOTINAMIDE_METABOLISM		19	0.33705	0.908975	0.569087	1	1	2025	tags=32%, list=17%, signal=38%
GOMF_MICROTUBULE_MOTOR_ACTIVITY	GOMF_MICROTUBULE_MOTOR_ACTIVITY		51	0.268446	0.908939	0.622356	1	1	2553	tags=31%, list=22%, signal=40%
GSE10239_NAIVE_VS_KLRG1HIGH_EFF_CD8_TCELL_UP	GSE10239_NAIVE_VS_KLRG1HIGH_EFF_CD8_TCELL_UP		156	0.224066	0.908932	0.698198	1	1	1977	tags=20%, list=17%, signal=24%
GSE27786_CD8_TCELL_VS_NEUTROPHIL_UP	GSE27786_CD8_TCELL_VS_NEUTROPHIL_UP		174	0.220261	0.908713	0.748634	1	1	2743	tags=26%, list=23%, signal=34%
HP_MICROPENIS	HP_MICROPENIS		169	0.216586	0.908582	0.763285	1	1	1290	tags=12%, list=11%, signal=13%
KEGG_FRUCTOSE_AND_MANNOSE_METABOLISM	KEGG_FRUCTOSE_AND_MANNOSE_METABOLISM		29	0.306147	0.908324	0.59116	1	1	1696	tags=24%, list=14%, signal=28%
GOMF_FERROUS_IRON_BINDING	GOMF_FERROUS_IRON_BINDING		16	0.359607	0.908026	0.572816	1	1	2505	tags=31%, list=21%, signal=40%
GSE39820_TGFBETA1_VS_TGFBETA3_IN_IL6_IL23A_TREATED_CD4_TCELL_UP	GSE39820_TGFBETA1_VS_TGFBETA3_IN_IL6_IL23A_TREATED_CD4_TCELL_UP		146	0.225789	0.908013	0.707763	1	1	2381	tags=22%, list=20%, signal=27%
GSE14908_ATOPIC_VS_NONATOPIC_PATIENT_HDM_STIM_CD4_TCELL_UP	GSE14908_ATOPIC_VS_NONATOPIC_PATIENT_HDM_STIM_CD4_TCELL_UP		158	0.224442	0.907834	0.756757	1	1	2988	tags=26%, list=25%, signal=34%
GOBP_NUCLEOSOME_ASSEMBLY	GOBP_NUCLEOSOME_ASSEMBLY		64	0.256252	0.907577	0.661342	1	1	3620	tags=33%, list=31%, signal=47%
GOBP_REGULATION_OF_VIRAL_TRANSCRIPTION	GOBP_REGULATION_OF_VIRAL_TRANSCRIPTION		38	0.291587	0.907532	0.619048	1	1	2383	tags=24%, list=20%, signal=30%
HP_ABNORMAL_CIRCULATING_PYRUVATE_FAMILY_AMINO_ACID_CONCENTRATION	HP_ABNORMAL_CIRCULATING_PYRUVATE_FAMILY_AMINO_ACID_CONCENTRATION		34	0.283982	0.907303	0.632768	1	1	2365	tags=24%, list=20%, signal=29%
HP_WIDE_INTERMAMILLARY_DISTANCE	HP_WIDE_INTERMAMILLARY_DISTANCE		78	0.246292	0.907159	0.659259	1	1	1805	tags=14%, list=15%, signal=17%
GSE6269_FLU_VS_E_COLI_INF_PBMC_DN	GSE6269_FLU_VS_E_COLI_INF_PBMC_DN		87	0.241124	0.907056	0.656357	1	1	1977	tags=28%, list=17%, signal=33%
HP_ANAL_ATRESIA	HP_ANAL_ATRESIA		101	0.233986	0.90701	0.669261	1	1	2558	tags=26%, list=22%, signal=33%
HP_PRIMITIVE_NEUROECTODERMAL_TUMOR	HP_PRIMITIVE_NEUROECTODERMAL_TUMOR		38	0.27681	0.906886	0.589674	1	1	3526	tags=42%, list=30%, signal=60%
GOBP_RESPONSE_TO_XENOBIOTIC_STIMULUS	GOBP_RESPONSE_TO_XENOBIOTIC_STIMULUS		46	0.267569	0.906767	0.622535	1	1	724	tags=11%, list=6%, signal=12%
GOBP_PYRIDINE_CONTAINING_COMPOUND_BIOSYNTHETIC_PROCESS	GOBP_PYRIDINE_CONTAINING_COMPOUND_BIOSYNTHETIC_PROCESS		23	0.316128	0.906421	0.594059	1	1	690	tags=17%, list=6%, signal=18%
HP_NEOPLASM_OF_THE_TONGUE	HP_NEOPLASM_OF_THE_TONGUE		32	0.296124	0.906317	0.59726	1	1	3437	tags=41%, list=29%, signal=57%
GSE14308_TH2_VS_NAIVE_CD4_TCELL_DN	GSE14308_TH2_VS_NAIVE_CD4_TCELL_DN		162	0.221906	0.906307	0.742489	1	1	2768	tags=23%, list=23%, signal=30%
GSE34156_UNTREATED_VS_24H_NOD2_AND_TLR1_TLR2_LIGAND_TREATED_MONOCYTE_DN	GSE34156_UNTREATED_VS_24H_NOD2_AND_TLR1_TLR2_LIGAND_TREATED_MONOCYTE_DN		76	0.249547	0.905587	0.658863	1	1	1819	tags=21%, list=15%, signal=25%
GOBP_PYRIMIDINE_NUCLEOSIDE_METABOLIC_PROCESS	GOBP_PYRIMIDINE_NUCLEOSIDE_METABOLIC_PROCESS		23	0.322944	0.905484	0.578947	1	1	1386	tags=26%, list=12%, signal=29%
GOBP_MODULATION_OF_EXCITATORY_POSTSYNAPTIC_POTENTIAL	GOBP_MODULATION_OF_EXCITATORY_POSTSYNAPTIC_POTENTIAL		24	0.315266	0.905123	0.565534	1	1	980	tags=13%, list=8%, signal=14%
HP_FEMORAL_BOWING	HP_FEMORAL_BOWING		29	0.298832	0.905118	0.602564	1	1	1284	tags=21%, list=11%, signal=23%
HP_ECTOPIC_ANUS	HP_ECTOPIC_ANUS		49	0.266944	0.904314	0.642857	1	1	1284	tags=16%, list=11%, signal=18%
GSE22601_DOUBLE_NEGATIVE_VS_CD8_SINGLE_POSITIVE_THYMOCYTE_DN	GSE22601_DOUBLE_NEGATIVE_VS_CD8_SINGLE_POSITIVE_THYMOCYTE_DN		104	0.233695	0.904157	0.665441	1	1	1660	tags=19%, list=14%, signal=22%
HP_METAPHYSEAL_WIDENING	HP_METAPHYSEAL_WIDENING		71	0.252026	0.904104	0.675277	1	1	1045	tags=10%, list=9%, signal=11%
HP_ABNORMAL_CONNECTION_OF_THE_CARDIAC_SEGMENTS	HP_ABNORMAL_CONNECTION_OF_THE_CARDIAC_SEGMENTS		155	0.218901	0.903921	0.781095	1	1	1867	tags=20%, list=16%, signal=23%
KEGG_GLYCOLYSIS_GLUCONEOGENESIS	KEGG_GLYCOLYSIS_GLUCONEOGENESIS		37	0.284843	0.903856	0.60119	1	1	1696	tags=22%, list=14%, signal=25%
HP_CONGENITAL_MUSCULAR_DYSTROPHY	HP_CONGENITAL_MUSCULAR_DYSTROPHY		17	0.352129	0.90382	0.577396	1	1	277	tags=12%, list=2%, signal=12%
HP_RESPIRATORY_FAILURE	HP_RESPIRATORY_FAILURE		152	0.221053	0.903458	0.710526	1	1	3140	tags=34%, list=27%, signal=45%
GOMF_METHYLATED_HISTONE_BINDING	GOMF_METHYLATED_HISTONE_BINDING		55	0.260617	0.903294	0.62037	1	1	3816	tags=36%, list=32%, signal=53%
GOBP_POSITIVE_REGULATION_OF_CILIUM_ASSEMBLY	GOBP_POSITIVE_REGULATION_OF_CILIUM_ASSEMBLY		16	0.349214	0.902981	0.589681	1	1	1787	tags=25%, list=15%, signal=29%
HP_IRREGULAR_MENSTRUATION	HP_IRREGULAR_MENSTRUATION		21	0.319335	0.902712	0.573643	1	1	455	tags=10%, list=4%, signal=10%
GOBP_N_TERMINAL_PROTEIN_AMINO_ACID_ACETYLATION	GOBP_N_TERMINAL_PROTEIN_AMINO_ACID_ACETYLATION		15	0.361885	0.902478	0.579853	1	1	2827	tags=27%, list=24%, signal=35%
GOMF_SNORNA_BINDING	GOMF_SNORNA_BINDING		30	0.294628	0.902469	0.611111	1	1	3525	tags=33%, list=30%, signal=47%
HP_HAND_POLYDACTYLY	HP_HAND_POLYDACTYLY		130	0.222307	0.902443	0.68018	1	1	2577	tags=25%, list=22%, signal=31%
HP_DECREASED_CIRCULATING_GONADOTROPIN_LEVEL	HP_DECREASED_CIRCULATING_GONADOTROPIN_LEVEL		15	0.346572	0.902246	0.592428	1	1	963	tags=20%, list=8%, signal=22%
GSE19401_PAM2CSK4_VS_RETINOIC_ACID_AND_PAM2CSK4_STIM_FOLLICULAR_DC_UP	GSE19401_PAM2CSK4_VS_RETINOIC_ACID_AND_PAM2CSK4_STIM_FOLLICULAR_DC_UP		135	0.225427	0.902095	0.742739	1	1	1315	tags=13%, list=11%, signal=14%
GOMF_VOLTAGE_GATED_CALCIUM_CHANNEL_ACTIVITY	GOMF_VOLTAGE_GATED_CALCIUM_CHANNEL_ACTIVITY		20	0.325434	0.901557	0.597436	1	1	1380	tags=30%, list=12%, signal=34%
GOBP_POSITIVE_REGULATION_OF_GENE_EXPRESSION_EPIGENETIC	GOBP_POSITIVE_REGULATION_OF_GENE_EXPRESSION_EPIGENETIC		39	0.276813	0.901483	0.620879	1	1	2383	tags=26%, list=20%, signal=32%
GSE27786_CD4_TCELL_VS_ERYTHTROBLAST_UP	GSE27786_CD4_TCELL_VS_ERYTHTROBLAST_UP		177	0.216108	0.901155	0.728972	1	1	2253	tags=18%, list=19%, signal=22%
HP_THORACIC_KYPHOSCOLIOSIS	HP_THORACIC_KYPHOSCOLIOSIS		15	0.352922	0.901105	0.592677	1	1	1375	tags=27%, list=12%, signal=30%
GSE14000_4H_VS_16H_LPS_DC_DN	GSE14000_4H_VS_16H_LPS_DC_DN		163	0.218783	0.900777	0.719388	1	1	1953	tags=20%, list=17%, signal=23%
GSE22886_IGM_MEMORY_BCELL_VS_BM_PLASMA_CELL_UP	GSE22886_IGM_MEMORY_BCELL_VS_BM_PLASMA_CELL_UP		157	0.220367	0.90077	0.746479	1	1	2379	tags=24%, list=20%, signal=30%
HP_SYNOSTOSIS_OF_CARPALS_TARSALS	HP_SYNOSTOSIS_OF_CARPALS_TARSALS		28	0.302374	0.900604	0.610127	1	1	1602	tags=25%, list=14%, signal=29%
GOBP_POSITIVE_REGULATION_OF_NUCLEOTIDE_METABOLIC_PROCESS	GOBP_POSITIVE_REGULATION_OF_NUCLEOTIDE_METABOLIC_PROCESS		28	0.304731	0.90057	0.620865	1	1	952	tags=18%, list=8%, signal=19%
GSE17721_CTRL_VS_POLYIC_8H_BMDC_UP	GSE17721_CTRL_VS_POLYIC_8H_BMDC_UP		169	0.21707	0.900489	0.780612	1	1	2763	tags=28%, list=23%, signal=36%
GSE15330_MEGAKARYOCYTE_ERYTHROID_VS_GRANULOCYTE_MONOCYTE_PROGENITOR_IKAROS_KO_UP	GSE15330_MEGAKARYOCYTE_ERYTHROID_VS_GRANULOCYTE_MONOCYTE_PROGENITOR_IKAROS_KO_UP		161	0.220491	0.900453	0.737327	1	1	2770	tags=29%, list=23%, signal=38%
GOBP_ENDOSOME_TRANSPORT_VIA_MULTIVESICULAR_BODY_SORTING_PATHWAY	GOBP_ENDOSOME_TRANSPORT_VIA_MULTIVESICULAR_BODY_SORTING_PATHWAY		26	0.310496	0.900141	0.59952	1	1	3265	tags=42%, list=28%, signal=58%
GOBP_REGULATION_OF_ALTERNATIVE_MRNA_SPLICING_VIA_SPLICEOSOME	GOBP_REGULATION_OF_ALTERNATIVE_MRNA_SPLICING_VIA_SPLICEOSOME		43	0.271402	0.899956	0.623188	1	1	3800	tags=33%, list=32%, signal=48%
GOBP_SIGNAL_TRANSDUCTION_INVOLVED_IN_CELL_CYCLE_CHECKPOINT	GOBP_SIGNAL_TRANSDUCTION_INVOLVED_IN_CELL_CYCLE_CHECKPOINT		67	0.252429	0.899878	0.677632	1	1	2164	tags=19%, list=18%, signal=24%
GSE18893_TCONV_VS_TREG_2H_TNF_STIM_UP	GSE18893_TCONV_VS_TREG_2H_TNF_STIM_UP		139	0.224354	0.89973	0.724138	1	1	2127	tags=19%, list=18%, signal=23%
HP_DEEP_PALMAR_CREASE	HP_DEEP_PALMAR_CREASE		15	0.348177	0.899377	0.59368	1	1	2826	tags=40%, list=24%, signal=53%
GOBP_REGULATION_OF_PROTEIN_LOCALIZATION_TO_CELL_SURFACE	GOBP_REGULATION_OF_PROTEIN_LOCALIZATION_TO_CELL_SURFACE		30	0.29767	0.899244	0.584699	1	1	626	tags=10%, list=5%, signal=11%
GSE2405_0H_VS_6H_A_PHAGOCYTOPHILUM_STIM_NEUTROPHIL_UP	GSE2405_0H_VS_6H_A_PHAGOCYTOPHILUM_STIM_NEUTROPHIL_UP		152	0.220457	0.899115	0.710145	1	1	1439	tags=15%, list=12%, signal=17%
HP_ABNORMAL_MUSCLE_FIBER_PROTEIN_EXPRESSION	HP_ABNORMAL_MUSCLE_FIBER_PROTEIN_EXPRESSION		23	0.313313	0.89877	0.580402	1	1	277	tags=9%, list=2%, signal=9%
KRAS.50_UP.V1_DN	KRAS.50_UP.V1_DN		18	0.331168	0.898592	0.595349	1	1	950	tags=28%, list=8%, signal=30%
GSE369_SOCS3_KO_VS_WT_LIVER_UP	GSE369_SOCS3_KO_VS_WT_LIVER_UP		170	0.216806	0.898258	0.73913	1	1	2807	tags=25%, list=24%, signal=33%
HP_ABNORMALLY_LARGE_GLOBE	HP_ABNORMALLY_LARGE_GLOBE		31	0.294477	0.897625	0.625344	1	1	1658	tags=16%, list=14%, signal=19%
HP_TETRALOGY_OF_FALLOT	HP_TETRALOGY_OF_FALLOT		112	0.224782	0.897146	0.693277	1	1	1867	tags=17%, list=16%, signal=20%
HP_FATIGABLE_WEAKNESS_OF_RESPIRATORY_MUSCLES	HP_FATIGABLE_WEAKNESS_OF_RESPIRATORY_MUSCLES		38	0.278645	0.89706	0.596542	1	1	3140	tags=39%, list=27%, signal=54%
HP_ABNORMALITY_OF_GLOBE_SIZE	HP_ABNORMALITY_OF_GLOBE_SIZE		205	0.211005	0.897043	0.764706	1	1	3060	tags=28%, list=26%, signal=37%
VEGF_A_UP.V1_DN	VEGF_A_UP.V1_DN		163	0.216582	0.896884	0.744792	1	1	885	tags=8%, list=7%, signal=9%
GOBP_DNA_RECOMBINATION	GOBP_DNA_RECOMBINATION		228	0.208316	0.896391	0.798701	1	1	2529	tags=24%, list=21%, signal=30%
GOMF_MICROTUBULE_BINDING	GOMF_MICROTUBULE_BINDING		208	0.206851	0.896366	0.818681	1	1	2368	tags=23%, list=20%, signal=28%
GOBP_STEROID_HORMONE_BIOSYNTHETIC_PROCESS	GOBP_STEROID_HORMONE_BIOSYNTHETIC_PROCESS		29	0.297002	0.896304	0.613158	1	1	2770	tags=41%, list=23%, signal=54%
HP_SMALL_FOR_GESTATIONAL_AGE	HP_SMALL_FOR_GESTATIONAL_AGE		160	0.21693	0.89626	0.741667	1	1	1552	tags=13%, list=13%, signal=15%
HP_WIDE_CRANIAL_SUTURES	HP_WIDE_CRANIAL_SUTURES		22	0.320736	0.895482	0.597015	1	1	1173	tags=23%, list=10%, signal=25%
HP_VERTEBRAL_SEGMENTATION_DEFECT	HP_VERTEBRAL_SEGMENTATION_DEFECT		87	0.238443	0.895422	0.65614	1	1	659	tags=10%, list=6%, signal=11%
GSE16385_IFNG_TNF_VS_IL4_STIM_MACROPHAGE_ROSIGLITAZONE_TREATED_DN	GSE16385_IFNG_TNF_VS_IL4_STIM_MACROPHAGE_ROSIGLITAZONE_TREATED_DN		159	0.216339	0.895341	0.704434	1	1	3179	tags=33%, list=27%, signal=45%
GSE20198_UNTREATED_VS_IFNA_TREATED_ACT_CD4_TCELL_DN	GSE20198_UNTREATED_VS_IFNA_TREATED_ACT_CD4_TCELL_DN		155	0.220186	0.895241	0.717822	1	1	2214	tags=25%, list=19%, signal=30%
HP_ABNORMAL_HAIR_PATTERN	HP_ABNORMAL_HAIR_PATTERN		223	0.206525	0.894988	0.812155	1	1	1455	tags=14%, list=12%, signal=16%
GSE17974_0H_VS_48H_IN_VITRO_ACT_CD4_TCELL_DN	GSE17974_0H_VS_48H_IN_VITRO_ACT_CD4_TCELL_DN		158	0.216778	0.894868	0.722222	1	1	3129	tags=35%, list=26%, signal=48%
GOBP_NEGATIVE_REGULATION_OF_CELL_CYCLE_G2_M_PHASE_TRANSITION	GOBP_NEGATIVE_REGULATION_OF_CELL_CYCLE_G2_M_PHASE_TRANSITION		89	0.24299	0.8948	0.699219	1	1	3951	tags=36%, list=33%, signal=54%
HP_ABNORMAL_CARDIAC_TEST	HP_ABNORMAL_CARDIAC_TEST		74	0.245147	0.894424	0.688312	1	1	1059	tags=14%, list=9%, signal=15%
HP_ECTOPIC_KIDNEY	HP_ECTOPIC_KIDNEY		51	0.260694	0.89356	0.638484	1	1	3570	tags=35%, list=30%, signal=50%
GSE2770_UNTREATED_VS_IL4_TREATED_ACT_CD4_TCELL_48H_DN	GSE2770_UNTREATED_VS_IL4_TREATED_ACT_CD4_TCELL_48H_DN		168	0.212657	0.893031	0.777202	1	1	3074	tags=31%, list=26%, signal=41%
GOBP_HISTONE_H3_K9_MODIFICATION	GOBP_HISTONE_H3_K9_MODIFICATION		36	0.283316	0.892205	0.626781	1	1	2743	tags=36%, list=23%, signal=47%
GSE34156_NOD2_LIGAND_VS_TLR1_TLR2_LIGAND_24H_TREATED_MONOCYTE_DN	GSE34156_NOD2_LIGAND_VS_TLR1_TLR2_LIGAND_24H_TREATED_MONOCYTE_DN		138	0.220192	0.891914	0.743478	1	1	2052	tags=24%, list=17%, signal=29%
GOBP_MONOCARBOXYLIC_ACID_CATABOLIC_PROCESS	GOBP_MONOCARBOXYLIC_ACID_CATABOLIC_PROCESS		96	0.233913	0.891621	0.735075	1	1	2730	tags=30%, list=23%, signal=39%
GOBP_POSITIVE_REGULATION_OF_STEM_CELL_PROLIFERATION	GOBP_POSITIVE_REGULATION_OF_STEM_CELL_PROLIFERATION		16	0.34269	0.891584	0.607317	1	1	1199	tags=19%, list=10%, signal=21%
HP_ABNORMAL_GLIAL_CELL_MORPHOLOGY	HP_ABNORMAL_GLIAL_CELL_MORPHOLOGY		119	0.226006	0.891528	0.745833	1	1	2185	tags=22%, list=18%, signal=27%
GOBP_RNA_CATABOLIC_PROCESS	GOBP_RNA_CATABOLIC_PROCESS		306	0.203475	0.891272	0.884615	1	1	2108	tags=20%, list=18%, signal=24%
GOBP_NEGATIVE_REGULATION_OF_PEPTIDYL_LYSINE_ACETYLATION	GOBP_NEGATIVE_REGULATION_OF_PEPTIDYL_LYSINE_ACETYLATION		15	0.343186	0.891142	0.599515	1	1	1664	tags=27%, list=14%, signal=31%
HP_METHYLMALONIC_ACIDURIA	HP_METHYLMALONIC_ACIDURIA		15	0.348097	0.890892	0.596372	1	1	3531	tags=53%, list=30%, signal=76%
GSE17721_POLYIC_VS_GARDIQUIMOD_4H_BMDC_UP	GSE17721_POLYIC_VS_GARDIQUIMOD_4H_BMDC_UP		161	0.217632	0.890862	0.800948	1	1	1462	tags=16%, list=12%, signal=18%
GOBP_REGULATION_OF_HEART_RATE_BY_CARDIAC_CONDUCTION	GOBP_REGULATION_OF_HEART_RATE_BY_CARDIAC_CONDUCTION		20	0.326514	0.890843	0.610825	1	1	1059	tags=30%, list=9%, signal=33%
HP_ATRIOVENTRICULAR_CANAL_DEFECT	HP_ATRIOVENTRICULAR_CANAL_DEFECT		31	0.288771	0.890663	0.632911	1	1	2535	tags=26%, list=21%, signal=33%
GSE22045_TREG_VS_TCONV_DN	GSE22045_TREG_VS_TCONV_DN		126	0.224999	0.890606	0.768559	1	1	1160	tags=13%, list=10%, signal=15%
KEGG_CITRATE_CYCLE_TCA_CYCLE	KEGG_CITRATE_CYCLE_TCA_CYCLE		27	0.301135	0.890146	0.624079	1	1	36	tags=4%, list=0%, signal=4%
GSE34006_UNTREATED_VS_A2AR_AGONIST_TREATED_TREG_UP	GSE34006_UNTREATED_VS_A2AR_AGONIST_TREATED_TREG_UP		157	0.217303	0.889956	0.729358	1	1	1401	tags=13%, list=12%, signal=15%
GSE40273_EOS_KO_VS_WT_TREG_DN	GSE40273_EOS_KO_VS_WT_TREG_DN		165	0.214564	0.889652	0.798969	1	1	1574	tags=15%, list=13%, signal=17%
GOBP_RESPONSE_TO_MITOCHONDRIAL_DEPOLARISATION	GOBP_RESPONSE_TO_MITOCHONDRIAL_DEPOLARISATION		19	0.325898	0.88893	0.618687	1	1	688	tags=16%, list=6%, signal=17%
GOBP_SULFUR_COMPOUND_CATABOLIC_PROCESS	GOBP_SULFUR_COMPOUND_CATABOLIC_PROCESS		38	0.273931	0.888693	0.633333	1	1	2400	tags=37%, list=20%, signal=46%
GOBP_ALTERNATIVE_MRNA_SPLICING_VIA_SPLICEOSOME	GOBP_ALTERNATIVE_MRNA_SPLICING_VIA_SPLICEOSOME		56	0.255469	0.887879	0.685535	1	1	3800	tags=32%, list=32%, signal=47%
GOBP_DNA_TEMPLATED_TRANSCRIPTION_INITIATION	GOBP_DNA_TEMPLATED_TRANSCRIPTION_INITIATION		181	0.215907	0.887582	0.815668	1	1	2037	tags=19%, list=17%, signal=23%
HP_INTELLECTUAL_DISABILITY_PROGRESSIVE	HP_INTELLECTUAL_DISABILITY_PROGRESSIVE		39	0.275508	0.887249	0.623595	1	1	3274	tags=41%, list=28%, signal=57%
GOBP_DNA_TEMPLATED_TRANSCRIPTION_ELONGATION	GOBP_DNA_TEMPLATED_TRANSCRIPTION_ELONGATION		95	0.236643	0.887129	0.715909	1	1	2603	tags=26%, list=22%, signal=33%
HP_NEOPLASM_BY_HISTOLOGY	HP_NEOPLASM_BY_HISTOLOGY		235	0.207383	0.886885	0.796296	1	1	1324	tags=14%, list=11%, signal=16%
HP_ABNORMAL_TONGUE_PHYSIOLOGY	HP_ABNORMAL_TONGUE_PHYSIOLOGY		33	0.288404	0.886679	0.667568	1	1	1368	tags=21%, list=12%, signal=24%
GOBP_PURINE_NUCLEOSIDE_MONOPHOSPHATE_BIOSYNTHETIC_PROCESS	GOBP_PURINE_NUCLEOSIDE_MONOPHOSPHATE_BIOSYNTHETIC_PROCESS		16	0.339193	0.886629	0.57554	1	1	1760	tags=25%, list=15%, signal=29%
GSE20198_IL12_VS_IL12_IL18_TREATED_ACT_CD4_TCELL_UP	GSE20198_IL12_VS_IL12_IL18_TREATED_ACT_CD4_TCELL_UP		171	0.213804	0.886443	0.835556	1	1	3253	tags=29%, list=28%, signal=40%
GOBP_NEGATIVE_REGULATION_OF_UBIQUITIN_DEPENDENT_PROTEIN_CATABOLIC_PROCESS	GOBP_NEGATIVE_REGULATION_OF_UBIQUITIN_DEPENDENT_PROTEIN_CATABOLIC_PROCESS		40	0.274697	0.886239	0.638728	1	1	1776	tags=18%, list=15%, signal=21%
GSE21927_HEALTHY_VS_TUMOROUS_BALBC_MOUSE_MONOCYTE_UP	GSE21927_HEALTHY_VS_TUMOROUS_BALBC_MOUSE_MONOCYTE_UP		134	0.218571	0.885603	0.772727	1	1	2946	tags=26%, list=25%, signal=34%
HP_OCULOMOTOR_APRAXIA	HP_OCULOMOTOR_APRAXIA		78	0.2397	0.884764	0.7	1	1	3331	tags=35%, list=28%, signal=48%
HP_SUPERNUMERARY_SPLEENS	HP_SUPERNUMERARY_SPLEENS		49	0.259523	0.884602	0.699387	1	1	1779	tags=27%, list=15%, signal=31%
HP_ABNORMAL_CALCIUM_PHOSPHATE_REGULATING_HORMONE_LEVEL	HP_ABNORMAL_CALCIUM_PHOSPHATE_REGULATING_HORMONE_LEVEL		30	0.288816	0.884189	0.631579	1	1	1397	tags=20%, list=12%, signal=23%
HP_ABNORMALITY_OF_THE_MUSCULATURE_OF_THE_LIMBS	HP_ABNORMALITY_OF_THE_MUSCULATURE_OF_THE_LIMBS		353	0.19497	0.88408	0.878788	1	1	1377	tags=13%, list=12%, signal=14%
HP_APLASIA_OF_THE_FINGERS	HP_APLASIA_OF_THE_FINGERS		44	0.270531	0.884014	0.659942	1	1	2023	tags=32%, list=17%, signal=38%
GOBP_DNA_REPLICATION_INDEPENDENT_NUCLEOSOME_ORGANIZATION	GOBP_DNA_REPLICATION_INDEPENDENT_NUCLEOSOME_ORGANIZATION		34	0.285792	0.883947	0.636364	1	1	3816	tags=47%, list=32%, signal=69%
GOBP_POSITIVE_REGULATION_OF_GLYCOLYTIC_PROCESS	GOBP_POSITIVE_REGULATION_OF_GLYCOLYTIC_PROCESS		19	0.318508	0.8838	0.629073	1	1	952	tags=21%, list=8%, signal=23%
GSE411_WT_VS_SOCS3_KO_MACROPHAGE_UP	GSE411_WT_VS_SOCS3_KO_MACROPHAGE_UP		166	0.214181	0.883786	0.816144	1	1	1776	tags=17%, list=15%, signal=20%
GSE1460_DP_THYMOCYTE_VS_THYMIC_STROMAL_CELL_UP	GSE1460_DP_THYMOCYTE_VS_THYMIC_STROMAL_CELL_UP		149	0.217475	0.883518	0.761062	1	1	1221	tags=12%, list=10%, signal=13%
HP_FALLS	HP_FALLS		18	0.324634	0.883443	0.598575	1	1	3215	tags=50%, list=27%, signal=69%
HP_STAGE_5_CHRONIC_KIDNEY_DISEASE	HP_STAGE_5_CHRONIC_KIDNEY_DISEASE		74	0.24254	0.882753	0.723906	1	1	1136	tags=12%, list=10%, signal=13%
HP_SUBCORTICAL_CEREBRAL_ATROPHY	HP_SUBCORTICAL_CEREBRAL_ATROPHY		17	0.333853	0.882448	0.617128	1	1	364	tags=12%, list=3%, signal=12%
GSE16385_IL4_VS_ROSIGLITAZONE_STIM_MACROPHAGE_UP	GSE16385_IL4_VS_ROSIGLITAZONE_STIM_MACROPHAGE_UP		158	0.213772	0.882116	0.806604	1	1	1835	tags=16%, list=16%, signal=19%
GOMF_DEAMINASE_ACTIVITY	GOMF_DEAMINASE_ACTIVITY		19	0.325458	0.882038	0.6125	1	1	1653	tags=26%, list=14%, signal=31%
GSE22611_UNSTIM_VS_2H_MDP_STIM_NOD2_TRANSDUCED_HEK293T_CELL_UP	GSE22611_UNSTIM_VS_2H_MDP_STIM_NOD2_TRANSDUCED_HEK293T_CELL_UP		134	0.220858	0.881833	0.767635	1	1	2571	tags=28%, list=22%, signal=36%
GSE15330_GRANULOCYTE_MONOCYTE_PROGENITOR_VS_PRO_BCELL_UP	GSE15330_GRANULOCYTE_MONOCYTE_PROGENITOR_VS_PRO_BCELL_UP		161	0.214903	0.881696	0.726804	1	1	3366	tags=32%, list=28%, signal=45%
GOBP_REGULATION_OF_POSTSYNAPTIC_MEMBRANE_POTENTIAL	GOBP_REGULATION_OF_POSTSYNAPTIC_MEMBRANE_POTENTIAL		58	0.251314	0.881321	0.694611	1	1	2984	tags=29%, list=25%, signal=39%
GOMF_LYSOPHOSPHOLIPASE_ACTIVITY	GOMF_LYSOPHOSPHOLIPASE_ACTIVITY		17	0.329953	0.881231	0.635036	1	1	925	tags=18%, list=8%, signal=19%
HP_MULTIPLE_JOINT_CONTRACTURES	HP_MULTIPLE_JOINT_CONTRACTURES		45	0.268106	0.881117	0.665635	1	1	5	tags=2%, list=0%, signal=2%
GOBP_TRANSCRIPTION_BY_RNA_POLYMERASE_III	GOBP_TRANSCRIPTION_BY_RNA_POLYMERASE_III		37	0.279474	0.881109	0.630208	1	1	4103	tags=43%, list=35%, signal=66%
GOBP_NEGATIVE_REGULATION_OF_RESPONSE_TO_DNA_DAMAGE_STIMULUS	GOBP_NEGATIVE_REGULATION_OF_RESPONSE_TO_DNA_DAMAGE_STIMULUS		67	0.246102	0.881073	0.745098	1	1	2153	tags=24%, list=18%, signal=29%
GSE31082_DP_VS_CD4_SP_THYMOCYTE_UP	GSE31082_DP_VS_CD4_SP_THYMOCYTE_UP		157	0.215867	0.880941	0.788991	1	1	2835	tags=25%, list=24%, signal=33%
HP_ABNORMAL_DIAPHYSIS_MORPHOLOGY	HP_ABNORMAL_DIAPHYSIS_MORPHOLOGY		217	0.205774	0.880536	0.825843	1	1	1678	tags=17%, list=14%, signal=20%
HP_ABSENT_EYEBROW	HP_ABSENT_EYEBROW		17	0.330867	0.880349	0.652393	1	1	381	tags=12%, list=3%, signal=12%
HP_PROGRESSIVE_SPASTIC_PARAPLEGIA	HP_PROGRESSIVE_SPASTIC_PARAPLEGIA		45	0.262521	0.880306	0.644118	1	1	2307	tags=24%, list=20%, signal=30%
GSE3982_EOSINOPHIL_VS_TH2_DN	GSE3982_EOSINOPHIL_VS_TH2_DN		168	0.209295	0.879616	0.808824	1	1	2618	tags=24%, list=22%, signal=30%
GSE22611_NOD2_TRANSDUCED_VS_CTRL_HEK293T_STIMULATED_WITH_MDP_2H_DN	GSE22611_NOD2_TRANSDUCED_VS_CTRL_HEK293T_STIMULATED_WITH_MDP_2H_DN		156	0.215813	0.879476	0.843049	1	1	2600	tags=25%, list=22%, signal=32%
GSE2770_IL4_ACT_VS_ACT_CD4_TCELL_2H_UP	GSE2770_IL4_ACT_VS_ACT_CD4_TCELL_2H_UP		178	0.210818	0.879003	0.825137	1	1	3356	tags=35%, list=28%, signal=49%
GSE32423_IL7_VS_IL4_MEMORY_CD8_TCELL_DN	GSE32423_IL7_VS_IL4_MEMORY_CD8_TCELL_DN		162	0.213093	0.878941	0.795	1	1	1919	tags=19%, list=16%, signal=22%
GOBP_CHEMICAL_SYNAPTIC_TRANSMISSION_POSTSYNAPTIC	GOBP_CHEMICAL_SYNAPTIC_TRANSMISSION_POSTSYNAPTIC		52	0.263259	0.878726	0.666667	1	1	2345	tags=23%, list=20%, signal=29%
GOBP_PYRUVATE_METABOLIC_PROCESS	GOBP_PYRUVATE_METABOLIC_PROCESS		113	0.230682	0.878675	0.74812	1	1	1789	tags=16%, list=15%, signal=19%
CRX_NRL_DN.V1_DN	CRX_NRL_DN.V1_DN		86	0.233997	0.878426	0.706107	1	1	665	tags=10%, list=6%, signal=11%
HP_WIDE_ANTERIOR_FONTANEL	HP_WIDE_ANTERIOR_FONTANEL		58	0.252307	0.878202	0.691395	1	1	2871	tags=31%, list=24%, signal=41%
GSE23505_UNTREATED_VS_4DAY_IL6_IL1_TREATED_CD4_TCELL_UP	GSE23505_UNTREATED_VS_4DAY_IL6_IL1_TREATED_CD4_TCELL_UP		171	0.214016	0.877792	0.794444	1	1	2098	tags=23%, list=18%, signal=28%
GOBP_MITOTIC_METAPHASE_PLATE_CONGRESSION	GOBP_MITOTIC_METAPHASE_PLATE_CONGRESSION		40	0.268687	0.877531	0.651351	1	1	3035	tags=28%, list=26%, signal=37%
GOBP_REGULATION_OF_EXTRACELLULAR_MATRIX_DISASSEMBLY	GOBP_REGULATION_OF_EXTRACELLULAR_MATRIX_DISASSEMBLY		15	0.337022	0.877329	0.618582	1	1	160	tags=13%, list=1%, signal=13%
GSE22886_UNSTIM_VS_IL15_STIM_NKCELL_UP	GSE22886_UNSTIM_VS_IL15_STIM_NKCELL_UP		133	0.222036	0.877308	0.811716	1	1	2127	tags=22%, list=18%, signal=26%
GSE17721_CTRL_VS_POLYIC_24H_BMDC_UP	GSE17721_CTRL_VS_POLYIC_24H_BMDC_UP		164	0.213356	0.877236	0.808612	1	1	2591	tags=30%, list=22%, signal=38%
GOBP_PROTEIN_LOCALIZATION_TO_MITOCHONDRION	GOBP_PROTEIN_LOCALIZATION_TO_MITOCHONDRION		117	0.223444	0.877192	0.758197	1	1	2223	tags=21%, list=19%, signal=25%
GSE37605_FOXP3_FUSION_GFP_VS_IRES_GFP_TREG_NOD_UP	GSE37605_FOXP3_FUSION_GFP_VS_IRES_GFP_TREG_NOD_UP		158	0.212912	0.877187	0.788136	1	1	1494	tags=16%, list=13%, signal=18%
GSE15330_WT_VS_IKAROS_KO_MEGAKARYOCYTE_ERYTHROID_PROGENITOR_UP	GSE15330_WT_VS_IKAROS_KO_MEGAKARYOCYTE_ERYTHROID_PROGENITOR_UP		153	0.214477	0.877059	0.796296	1	1	2713	tags=24%, list=23%, signal=30%
HP_GENERALIZED_HYPOPIGMENTATION	HP_GENERALIZED_HYPOPIGMENTATION		24	0.306543	0.876956	0.611529	1	1	1097	tags=13%, list=9%, signal=14%
GOBP_POSITIVE_REGULATION_OF_SIGNAL_TRANSDUCTION_BY_P53_CLASS_MEDIATOR	GOBP_POSITIVE_REGULATION_OF_SIGNAL_TRANSDUCTION_BY_P53_CLASS_MEDIATOR		17	0.328038	0.876887	0.638889	1	1	731	tags=18%, list=6%, signal=19%
KEGG_BUTANOATE_METABOLISM	KEGG_BUTANOATE_METABOLISM		21	0.315911	0.876187	0.604061	1	1	3718	tags=33%, list=31%, signal=49%
HP_SCOTOMA	HP_SCOTOMA		49	0.253894	0.875861	0.681818	1	1	1781	tags=14%, list=15%, signal=17%
GOBP_BILE_ACID_BIOSYNTHETIC_PROCESS	GOBP_BILE_ACID_BIOSYNTHETIC_PROCESS		23	0.309537	0.875752	0.64	1	1	1901	tags=35%, list=16%, signal=41%
GSE5542_IFNG_VS_IFNA_TREATED_EPITHELIAL_CELLS_24H_UP	GSE5542_IFNG_VS_IFNA_TREATED_EPITHELIAL_CELLS_24H_UP		175	0.210645	0.875139	0.897959	1	1	2913	tags=26%, list=25%, signal=34%
GOBP_SNRNA_TRANSCRIPTION	GOBP_SNRNA_TRANSCRIPTION		69	0.240973	0.875052	0.704082	1	1	4141	tags=43%, list=35%, signal=67%
HP_MOTOR_POLYNEUROPATHY	HP_MOTOR_POLYNEUROPATHY		17	0.328355	0.874319	0.62619	1	1	1756	tags=24%, list=15%, signal=28%
GOMF_CLATHRIN_BINDING	GOMF_CLATHRIN_BINDING		50	0.257844	0.874292	0.684543	1	1	233	tags=6%, list=2%, signal=6%
GSE33513_TCF7_KO_VS_HET_EARLY_THYMIC_PROGENITOR_DN	GSE33513_TCF7_KO_VS_HET_EARLY_THYMIC_PROGENITOR_DN		161	0.211456	0.874275	0.841121	1	1	2620	tags=27%, list=22%, signal=35%
GSE2770_UNTREATED_VS_TGFB_AND_IL12_TREATED_ACT_CD4_TCELL_48H_UP	GSE2770_UNTREATED_VS_TGFB_AND_IL12_TREATED_ACT_CD4_TCELL_48H_UP		151	0.218244	0.874114	0.813953	1	1	1840	tags=18%, list=16%, signal=21%
GSE19888_NO_PRETREAT_VS_ADENOSINE_A3R_INHIBITOR_PRETREATED_MAST_CELL_TCELL_MEMBRANES_ACT_DN	GSE19888_NO_PRETREAT_VS_ADENOSINE_A3R_INHIBITOR_PRETREATED_MAST_CELL_TCELL_MEMBRANES_ACT_DN		166	0.210654	0.873659	0.833333	1	1	2799	tags=28%, list=24%, signal=36%
HP_NARROW_MOUTH	HP_NARROW_MOUTH		156	0.21158	0.873654	0.829493	1	1	1701	tags=15%, list=14%, signal=17%
GOBP_REGULATION_OF_GENE_SILENCING_BY_RNA	GOBP_REGULATION_OF_GENE_SILENCING_BY_RNA		79	0.24056	0.873573	0.731629	1	1	2383	tags=19%, list=20%, signal=24%
HP_AMINOACIDURIA	HP_AMINOACIDURIA		74	0.240299	0.87276	0.685921	1	1	2620	tags=28%, list=22%, signal=36%
GSE22432_MULTIPOTENT_PROGENITOR_VS_PDC_DN	GSE22432_MULTIPOTENT_PROGENITOR_VS_PDC_DN		169	0.208919	0.872665	0.823232	1	1	3777	tags=36%, list=32%, signal=51%
GOBP_NEGATIVE_REGULATION_OF_ACTIN_FILAMENT_DEPOLYMERIZATION	GOBP_NEGATIVE_REGULATION_OF_ACTIN_FILAMENT_DEPOLYMERIZATION		33	0.290186	0.872538	0.652542	1	1	1529	tags=21%, list=13%, signal=24%
GSE21063_CTRL_VS_ANTI_IGM_STIM_BCELL_NFATC1_KO_16H_DN	GSE21063_CTRL_VS_ANTI_IGM_STIM_BCELL_NFATC1_KO_16H_DN		163	0.212856	0.872134	0.862069	1	1	1465	tags=16%, list=12%, signal=18%
GOCC_SITE_OF_DNA_DAMAGE	GOCC_SITE_OF_DNA_DAMAGE		76	0.23586	0.871819	0.744526	1	1	2584	tags=29%, list=22%, signal=37%
GSE27786_LSK_VS_ERYTHROBLAST_UP	GSE27786_LSK_VS_ERYTHROBLAST_UP		166	0.209937	0.871263	0.857778	1	1	2330	tags=21%, list=20%, signal=26%
GOBP_PYRIMIDINE_NUCLEOSIDE_TRIPHOSPHATE_METABOLIC_PROCESS	GOBP_PYRIMIDINE_NUCLEOSIDE_TRIPHOSPHATE_METABOLIC_PROCESS		15	0.334544	0.871232	0.624691	1	1	3728	tags=47%, list=32%, signal=68%
GOBP_CEREBELLAR_CORTEX_DEVELOPMENT	GOBP_CEREBELLAR_CORTEX_DEVELOPMENT		29	0.27884	0.871217	0.615385	1	1	1906	tags=24%, list=16%, signal=29%
GOBP_REGULATION_OF_FATTY_ACID_OXIDATION	GOBP_REGULATION_OF_FATTY_ACID_OXIDATION		22	0.309594	0.87101	0.641827	1	1	1524	tags=23%, list=13%, signal=26%
HP_ABNORMAL_GLUCOSE_HOMEOSTASIS	HP_ABNORMAL_GLUCOSE_HOMEOSTASIS		409	0.190534	0.870982	0.960396	1	1	2539	tags=22%, list=21%, signal=27%
GOCC_FIBRILLAR_CENTER	GOCC_FIBRILLAR_CENTER		119	0.223832	0.870823	0.774704	1	1	2543	tags=23%, list=22%, signal=29%
GOBP_CHROMATIN_REMODELING	GOBP_CHROMATIN_REMODELING		143	0.213417	0.870547	0.809302	1	1	3495	tags=31%, list=30%, signal=44%
HP_OSTEOARTHRITIS	HP_OSTEOARTHRITIS		43	0.26883	0.870485	0.685358	1	1	1593	tags=16%, list=13%, signal=19%
GOBP_MAINTENANCE_OF_CELL_POLARITY	GOBP_MAINTENANCE_OF_CELL_POLARITY		15	0.344529	0.870218	0.62704	1	1	1207	tags=20%, list=10%, signal=22%
GOBP_DETECTION_OF_CHEMICAL_STIMULUS	GOBP_DETECTION_OF_CHEMICAL_STIMULUS		27	0.289387	0.870121	0.670077	1	1	1848	tags=30%, list=16%, signal=35%
HP_THICK_NASAL_ALAE	HP_THICK_NASAL_ALAE		16	0.328895	0.869937	0.630332	1	1	1522	tags=19%, list=13%, signal=21%
GSE14415_TCONV_VS_FOXP3_KO_INDUCED_TREG_UP	GSE14415_TCONV_VS_FOXP3_KO_INDUCED_TREG_UP		141	0.213671	0.869887	0.797468	1	1	1855	tags=17%, list=16%, signal=20%
GOBP_MITOCHONDRIAL_MEMBRANE_ORGANIZATION	GOBP_MITOCHONDRIAL_MEMBRANE_ORGANIZATION		111	0.225788	0.869818	0.773585	1	1	2363	tags=25%, list=20%, signal=31%
HP_ABNORMAL_URINE_PH	HP_ABNORMAL_URINE_PH		71	0.241124	0.869412	0.719472	1	1	3718	tags=39%, list=31%, signal=57%
GOBP_DNA_REPLICATION_CHECKPOINT	GOBP_DNA_REPLICATION_CHECKPOINT		16	0.329941	0.868927	0.642336	1	1	2423	tags=31%, list=21%, signal=39%
HP_ABNORMALITY_OF_THE_PHALANGES_OF_THE_HALLUX	HP_ABNORMALITY_OF_THE_PHALANGES_OF_THE_HALLUX		29	0.285738	0.868776	0.67013	1	1	1284	tags=14%, list=11%, signal=15%
GOCC_UBIQUITIN_LIGASE_COMPLEX	GOCC_UBIQUITIN_LIGASE_COMPLEX		240	0.201314	0.868483	0.877301	1	1	2293	tags=16%, list=19%, signal=19%
GSE20727_DNFB_ALLERGEN_VS_ROS_INH_AND_DNFB_ALLERGEN_TREATED_DC_UP	GSE20727_DNFB_ALLERGEN_VS_ROS_INH_AND_DNFB_ALLERGEN_TREATED_DC_UP		125	0.216635	0.868126	0.791165	1	1	1491	tags=14%, list=13%, signal=16%
GSE46606_DAY1_VS_DAY3_CD40L_IL2_IL5_STIMULATED_IRF4HIGH_BCELL_UP	GSE46606_DAY1_VS_DAY3_CD40L_IL2_IL5_STIMULATED_IRF4HIGH_BCELL_UP		160	0.211183	0.868078	0.829146	1	1	2660	tags=28%, list=23%, signal=35%
GSE11864_UNTREATED_VS_CSF1_IFNG_PAM3CYS_IN_MAC_UP	GSE11864_UNTREATED_VS_CSF1_IFNG_PAM3CYS_IN_MAC_UP		148	0.215905	0.867827	0.808696	1	1	2186	tags=20%, list=19%, signal=25%
HP_ABNORMALITY_OF_CARPAL_BONE_OSSIFICATION	HP_ABNORMALITY_OF_CARPAL_BONE_OSSIFICATION		25	0.30498	0.866992	0.666667	1	1	1627	tags=16%, list=14%, signal=19%
GOBP_MRNA_METHYLATION	GOBP_MRNA_METHYLATION		16	0.332987	0.866911	0.635266	1	1	3782	tags=38%, list=32%, signal=55%
GSE42021_CD24LO_TREG_VS_CD24LO_TCONV_THYMUS_DN	GSE42021_CD24LO_TREG_VS_CD24LO_TCONV_THYMUS_DN		165	0.21192	0.866899	0.839024	1	1	2200	tags=22%, list=19%, signal=26%
GSE5589_UNSTIM_VS_45MIN_LPS_STIM_MACROPHAGE_DN	GSE5589_UNSTIM_VS_45MIN_LPS_STIM_MACROPHAGE_DN		153	0.211299	0.866884	0.819048	1	1	2646	tags=24%, list=22%, signal=31%
HP_APLASIA_HYPOPLASIA_OF_THE_CEREBELLAR_VERMIS	HP_APLASIA_HYPOPLASIA_OF_THE_CEREBELLAR_VERMIS		187	0.206768	0.86679	0.812155	1	1	2826	tags=26%, list=24%, signal=33%
GSE42021_CD24HI_TREG_VS_CD24HI_TCONV_THYMUS_UP	GSE42021_CD24HI_TREG_VS_CD24HI_TCONV_THYMUS_UP		164	0.209366	0.866556	0.831818	1	1	3222	tags=30%, list=27%, signal=41%
GSE2770_UNTREATED_VS_IL12_TREATED_ACT_CD4_TCELL_6H_DN	GSE2770_UNTREATED_VS_IL12_TREATED_ACT_CD4_TCELL_6H_DN		152	0.212977	0.866108	0.814346	1	1	2279	tags=22%, list=19%, signal=27%
HP_ABNORMAL_CARDIAC_VENTRICLE_MORPHOLOGY	HP_ABNORMAL_CARDIAC_VENTRICLE_MORPHOLOGY		421	0.192242	0.865931	0.946237	1	1	2558	tags=22%, list=22%, signal=27%
HP_LIMB_GIRDLE_MUSCLE_ATROPHY	HP_LIMB_GIRDLE_MUSCLE_ATROPHY		25	0.291577	0.865544	0.678392	1	1	1643	tags=20%, list=14%, signal=23%
HP_INSOMNIA	HP_INSOMNIA		31	0.2806	0.865296	0.637097	1	1	450	tags=10%, list=4%, signal=10%
GOBP_REGULATION_OF_NUCLEOTIDE_BIOSYNTHETIC_PROCESS	GOBP_REGULATION_OF_NUCLEOTIDE_BIOSYNTHETIC_PROCESS		23	0.306308	0.865088	0.643541	1	1	1221	tags=17%, list=10%, signal=19%
HP_STOMACH_CANCER	HP_STOMACH_CANCER		17	0.324312	0.864944	0.660891	1	1	2899	tags=41%, list=25%, signal=54%
GSE7852_LN_VS_FAT_TCONV_UP	GSE7852_LN_VS_FAT_TCONV_UP		159	0.214904	0.864928	0.868421	1	1	3515	tags=36%, list=30%, signal=50%
GSE15930_NAIVE_VS_24H_IN_VITRO_STIM_CD8_TCELL_DN	GSE15930_NAIVE_VS_24H_IN_VITRO_STIM_CD8_TCELL_DN		173	0.206991	0.864802	0.858757	1	1	2838	tags=25%, list=24%, signal=33%
GSE2770_UNTREATED_VS_TGFB_AND_IL12_TREATED_ACT_CD4_TCELL_6H_UP	GSE2770_UNTREATED_VS_TGFB_AND_IL12_TREATED_ACT_CD4_TCELL_6H_UP		163	0.208451	0.86461	0.86385	1	1	3832	tags=39%, list=32%, signal=56%
GSE36078_UNTREATED_VS_AD5_INF_IL1R_KO_MOUSE_LUNG_DC_UP	GSE36078_UNTREATED_VS_AD5_INF_IL1R_KO_MOUSE_LUNG_DC_UP		161	0.208893	0.864122	0.825893	1	1	2678	tags=26%, list=23%, signal=33%
GOMF_DNA_SECONDARY_STRUCTURE_BINDING	GOMF_DNA_SECONDARY_STRUCTURE_BINDING		29	0.283346	0.863747	0.702128	1	1	3616	tags=45%, list=31%, signal=64%
HP_RETINAL_COLOBOMA	HP_RETINAL_COLOBOMA		22	0.308094	0.863694	0.640777	1	1	3345	tags=41%, list=28%, signal=57%
GSE15930_STIM_VS_STIM_AND_IFNAB_72H_CD8_T_CELL_UP	GSE15930_STIM_VS_STIM_AND_IFNAB_72H_CD8_T_CELL_UP		132	0.216533	0.863566	0.826667	1	1	1879	tags=17%, list=16%, signal=20%
GOBP_MULTIVESICULAR_BODY_SORTING_PATHWAY	GOBP_MULTIVESICULAR_BODY_SORTING_PATHWAY		31	0.284477	0.863016	0.653226	1	1	3265	tags=39%, list=28%, signal=53%
GSE36009_WT_VS_NLRP10_KO_DC_LPS_STIM_DN	GSE36009_WT_VS_NLRP10_KO_DC_LPS_STIM_DN		159	0.211425	0.86298	0.830275	1	1	2163	tags=21%, list=18%, signal=25%
HP_GAZE_EVOKED_NYSTAGMUS	HP_GAZE_EVOKED_NYSTAGMUS		25	0.296664	0.86289	0.673629	1	1	4099	tags=52%, list=35%, signal=79%
GSE1740_UNSTIM_VS_IFNA_STIMULATED_MCSF_IFNG_DERIVED_MACROPHAGE_UP	GSE1740_UNSTIM_VS_IFNA_STIMULATED_MCSF_IFNG_DERIVED_MACROPHAGE_UP		117	0.217657	0.862809	0.783465	1	1	2056	tags=19%, list=17%, signal=23%
HP_UROGENITAL_FISTULA	HP_UROGENITAL_FISTULA		26	0.293301	0.862686	0.672872	1	1	2448	tags=35%, list=21%, signal=44%
GOBP_HISTONE_UBIQUITINATION	GOBP_HISTONE_UBIQUITINATION		43	0.263585	0.862358	0.683761	1	1	2765	tags=23%, list=23%, signal=30%
HALLMARK_BILE_ACID_METABOLISM	HALLMARK_BILE_ACID_METABOLISM		70	0.241009	0.861987	0.755486	1	1	1183	tags=19%, list=10%, signal=21%
GOMF_PHOSPHATASE_INHIBITOR_ACTIVITY	GOMF_PHOSPHATASE_INHIBITOR_ACTIVITY		26	0.289318	0.861838	0.661972	1	1	1471	tags=23%, list=12%, signal=26%
HP_ABNORMAL_SOFT_PALATE_MORPHOLOGY	HP_ABNORMAL_SOFT_PALATE_MORPHOLOGY		160	0.210502	0.861179	0.825641	1	1	1290	tags=14%, list=11%, signal=16%
GOBP_NUCLEOSIDE_MONOPHOSPHATE_BIOSYNTHETIC_PROCESS	GOBP_NUCLEOSIDE_MONOPHOSPHATE_BIOSYNTHETIC_PROCESS		29	0.283374	0.860939	0.673025	1	1	3532	tags=41%, list=30%, signal=59%
HP_MUSCLE_SPASM	HP_MUSCLE_SPASM		111	0.218332	0.860711	0.827586	1	1	532	tags=6%, list=5%, signal=7%
HP_DECREASED_CIRCULATING_CORTISOL_LEVEL	HP_DECREASED_CIRCULATING_CORTISOL_LEVEL		19	0.314834	0.86067	0.678304	1	1	2743	tags=32%, list=23%, signal=41%
GSE17721_CTRL_VS_CPG_2H_BMDC_UP	GSE17721_CTRL_VS_CPG_2H_BMDC_UP		172	0.207834	0.860346	0.871921	1	1	2656	tags=23%, list=22%, signal=29%
GSE9946_MATURE_STIMULATORY_VS_PROSTAGLANDINE2_TREATED_MATURE_DC_UP	GSE9946_MATURE_STIMULATORY_VS_PROSTAGLANDINE2_TREATED_MATURE_DC_UP		93	0.222607	0.859995	0.749064	1	1	1531	tags=15%, list=13%, signal=17%
GSE17721_CPG_VS_GARDIQUIMOD_0.5H_BMDC_UP	GSE17721_CPG_VS_GARDIQUIMOD_0.5H_BMDC_UP		134	0.212471	0.859932	0.813044	1	1	2307	tags=25%, list=20%, signal=31%
GSE16450_CTRL_VS_IFNA_12H_STIM_MATURE_NEURON_CELL_LINE_UP	GSE16450_CTRL_VS_IFNA_12H_STIM_MATURE_NEURON_CELL_LINE_UP		114	0.218472	0.859924	0.814229	1	1	3195	tags=37%, list=27%, signal=50%
GOCC_EUCHROMATIN	GOCC_EUCHROMATIN		20	0.317612	0.859887	0.63789	1	1	65	tags=5%, list=1%, signal=5%
HP_ABNORMALITY_OF_THE_MENSTRUAL_CYCLE	HP_ABNORMALITY_OF_THE_MENSTRUAL_CYCLE		164	0.207748	0.859611	0.858639	1	1	603	tags=7%, list=5%, signal=7%
HP_FATIGABLE_WEAKNESS_OF_SKELETAL_MUSCLES	HP_FATIGABLE_WEAKNESS_OF_SKELETAL_MUSCLES		20	0.318431	0.859462	0.657635	1	1	1602	tags=25%, list=14%, signal=29%
GOBP_REGULATION_OF_RESPONSE_TO_DNA_DAMAGE_STIMULUS	GOBP_REGULATION_OF_RESPONSE_TO_DNA_DAMAGE_STIMULUS		185	0.204426	0.859265	0.892473	1	1	2600	tags=24%, list=22%, signal=30%
GSE17721_0.5H_VS_4H_PAM3CSK4_BMDC_UP	GSE17721_0.5H_VS_4H_PAM3CSK4_BMDC_UP		161	0.206477	0.859218	0.833333	1	1	2826	tags=28%, list=24%, signal=36%
HP_APLASIA_HYPOPLASIA_OF_THE_5TH_FINGER	HP_APLASIA_HYPOPLASIA_OF_THE_5TH_FINGER		28	0.284211	0.85894	0.663158	1	1	942	tags=18%, list=8%, signal=19%
GOMF_HYDROLASE_ACTIVITY_HYDROLYZING_O_GLYCOSYL_COMPOUNDS	GOMF_HYDROLASE_ACTIVITY_HYDROLYZING_O_GLYCOSYL_COMPOUNDS		57	0.244632	0.858861	0.731707	1	1	2270	tags=19%, list=19%, signal=24%
HP_HAND_TREMOR	HP_HAND_TREMOR		19	0.317854	0.858735	0.635922	1	1	2507	tags=26%, list=21%, signal=33%
GSE17721_POLYIC_VS_PAM3CSK4_1H_BMDC_UP	GSE17721_POLYIC_VS_PAM3CSK4_1H_BMDC_UP		148	0.212876	0.858636	0.8	1	1	3333	tags=30%, list=28%, signal=42%
HP_WEAK_VOICE	HP_WEAK_VOICE		17	0.333712	0.85862	0.631043	1	1	54	tags=6%, list=0%, signal=6%
GSE41978_WT_VS_ID2_KO_KLRG1_LOW_EFFECTOR_CD8_TCELL_UP	GSE41978_WT_VS_ID2_KO_KLRG1_LOW_EFFECTOR_CD8_TCELL_UP		111	0.219638	0.858572	0.805907	1	1	626	tags=8%, list=5%, signal=8%
GSE27786_LIN_NEG_VS_NKTCELL_DN	GSE27786_LIN_NEG_VS_NKTCELL_DN		177	0.202193	0.85824	0.849162	1	1	1511	tags=14%, list=13%, signal=15%
GOBP_LONG_CHAIN_FATTY_ACID_METABOLIC_PROCESS	GOBP_LONG_CHAIN_FATTY_ACID_METABOLIC_PROCESS		59	0.243183	0.857998	0.690691	1	1	1736	tags=22%, list=15%, signal=26%
GOBP_CATECHOLAMINE_SECRETION	GOBP_CATECHOLAMINE_SECRETION		22	0.304472	0.857845	0.648019	1	1	1237	tags=18%, list=10%, signal=20%
HP_ABNORMALITY_OF_SKELETAL_MATURATION	HP_ABNORMALITY_OF_SKELETAL_MATURATION		261	0.197221	0.85709	0.888	1	1	2562	tags=20%, list=22%, signal=25%
GSE15930_NAIVE_VS_48H_IN_VITRO_STIM_CD8_TCELL_DN	GSE15930_NAIVE_VS_48H_IN_VITRO_STIM_CD8_TCELL_DN		175	0.203769	0.856684	0.88172	1	1	3743	tags=37%, list=32%, signal=54%
GOBP_MITOTIC_DNA_INTEGRITY_CHECKPOINT	GOBP_MITOTIC_DNA_INTEGRITY_CHECKPOINT		92	0.227711	0.856639	0.780731	1	1	3493	tags=30%, list=30%, signal=43%
HP_ABNORMALITY_OF_OCULAR_SMOOTH_PURSUIT	HP_ABNORMALITY_OF_OCULAR_SMOOTH_PURSUIT		46	0.252145	0.856475	0.696884	1	1	4161	tags=41%, list=35%, signal=64%
HP_ABNORMAL_SACRUM_MORPHOLOGY	HP_ABNORMAL_SACRUM_MORPHOLOGY		87	0.226513	0.856219	0.774648	1	1	1853	tags=17%, list=16%, signal=20%
GSE21927_SPLEEN_VS_C26GM_TUMOR_MONOCYTE_BALBC_DN	GSE21927_SPLEEN_VS_C26GM_TUMOR_MONOCYTE_BALBC_DN		145	0.211525	0.85605	0.86383	1	1	1567	tags=18%, list=13%, signal=20%
GOBP_REGULATION_OF_ATP_METABOLIC_PROCESS	GOBP_REGULATION_OF_ATP_METABOLIC_PROCESS		88	0.226055	0.855953	0.805654	1	1	952	tags=9%, list=8%, signal=10%
GOBP_NEGATIVE_REGULATION_OF_GLUCOSE_TRANSMEMBRANE_TRANSPORT	GOBP_NEGATIVE_REGULATION_OF_GLUCOSE_TRANSMEMBRANE_TRANSPORT		15	0.332037	0.855587	0.608479	1	1	2028	tags=27%, list=17%, signal=32%
GSE22432_MULTIPOTENT_PROGENITOR_VS_CDC_DN	GSE22432_MULTIPOTENT_PROGENITOR_VS_CDC_DN		167	0.208094	0.855184	0.863415	1	1	3048	tags=26%, list=26%, signal=34%
GOCC_MITOTIC_SPINDLE_POLE	GOCC_MITOTIC_SPINDLE_POLE		30	0.283631	0.855035	0.666667	1	1	2136	tags=20%, list=18%, signal=24%
GSE29164_UNTREATED_VS_CD8_TCELL_AND_IL12_TREATED_MELANOMA_DAY3_UP	GSE29164_UNTREATED_VS_CD8_TCELL_AND_IL12_TREATED_MELANOMA_DAY3_UP		163	0.20828	0.854198	0.85446	1	1	2186	tags=21%, list=19%, signal=26%
HP_ACCESSORY_SPLEEN	HP_ACCESSORY_SPLEEN		20	0.309476	0.854017	0.647215	1	1	2555	tags=25%, list=22%, signal=32%
GOMF_ION_CHANNEL_REGULATOR_ACTIVITY	GOMF_ION_CHANNEL_REGULATOR_ACTIVITY		63	0.241278	0.853932	0.716561	1	1	2579	tags=32%, list=22%, signal=40%
GOBP_NUCLEOSIDE_PHOSPHATE_BIOSYNTHETIC_PROCESS	GOBP_NUCLEOSIDE_PHOSPHATE_BIOSYNTHETIC_PROCESS		179	0.205435	0.853751	0.905759	1	1	2085	tags=19%, list=18%, signal=23%
GSE22601_DOUBLE_NEGATIVE_VS_CD8_SINGLE_POSITIVE_THYMOCYTE_UP	GSE22601_DOUBLE_NEGATIVE_VS_CD8_SINGLE_POSITIVE_THYMOCYTE_UP		119	0.211473	0.853538	0.842308	1	1	1759	tags=18%, list=15%, signal=22%
GSE17721_LPS_VS_POLYIC_4H_BMDC_DN	GSE17721_LPS_VS_POLYIC_4H_BMDC_DN		174	0.201672	0.853251	0.874372	1	1	1472	tags=14%, list=12%, signal=16%
HP_EXCESSIVE_DAYTIME_SOMNOLENCE	HP_EXCESSIVE_DAYTIME_SOMNOLENCE		47	0.25584	0.85283	0.701183	1	1	3718	tags=40%, list=31%, signal=59%
HP_PHOTOPHOBIA	HP_PHOTOPHOBIA		143	0.209866	0.851763	0.890351	1	1	1719	tags=17%, list=15%, signal=20%
GOMF_EXORIBONUCLEASE_ACTIVITY	GOMF_EXORIBONUCLEASE_ACTIVITY		38	0.263233	0.851741	0.722527	1	1	4214	tags=45%, list=36%, signal=69%
GOBP_MEMBRANE_DOCKING	GOBP_MEMBRANE_DOCKING		154	0.210321	0.850761	0.851064	1	1	2579	tags=26%, list=22%, signal=33%
GOBP_NEGATIVE_REGULATION_OF_DNA_REPLICATION	GOBP_NEGATIVE_REGULATION_OF_DNA_REPLICATION		26	0.292058	0.850097	0.704225	1	1	2188	tags=27%, list=19%, signal=33%
HP_URINARY_TRACT_NEOPLASM	HP_URINARY_TRACT_NEOPLASM		107	0.220588	0.850005	0.81746	1	1	2260	tags=21%, list=19%, signal=25%
GSE3400_UNTREATED_VS_IFNB_TREATED_MEF_UP	GSE3400_UNTREATED_VS_IFNB_TREATED_MEF_UP		168	0.206672	0.849981	0.88785	1	1	3388	tags=30%, list=29%, signal=42%
GSE14308_TH2_VS_NATURAL_TREG_UP	GSE14308_TH2_VS_NATURAL_TREG_UP		155	0.20677	0.849891	0.878453	1	1	2534	tags=26%, list=21%, signal=33%
GOBP_REGULATION_OF_NUCLEOTIDE_METABOLIC_PROCESS	GOBP_REGULATION_OF_NUCLEOTIDE_METABOLIC_PROCESS		84	0.231067	0.849694	0.810526	1	1	1221	tags=11%, list=10%, signal=12%
GSE22886_NAIVE_CD4_TCELL_VS_48H_ACT_TH1_DN	GSE22886_NAIVE_CD4_TCELL_VS_48H_ACT_TH1_DN		169	0.203911	0.849532	0.882051	1	1	2571	tags=23%, list=22%, signal=29%
GSE2770_TGFB_AND_IL4_VS_IL4_TREATED_ACT_CD4_TCELL_6H_UP	GSE2770_TGFB_AND_IL4_VS_IL4_TREATED_ACT_CD4_TCELL_6H_UP		151	0.209735	0.849347	0.810945	1	1	2743	tags=27%, list=23%, signal=35%
GOBP_NEGATIVE_REGULATION_OF_PROTEIN_CONTAINING_COMPLEX_DISASSEMBLY	GOBP_NEGATIVE_REGULATION_OF_PROTEIN_CONTAINING_COMPLEX_DISASSEMBLY		62	0.241127	0.849015	0.747692	1	1	3110	tags=31%, list=26%, signal=41%
HP_AMENORRHEA	HP_AMENORRHEA		104	0.219479	0.848927	0.830189	1	1	2253	tags=20%, list=19%, signal=25%
GSE23114_WT_VS_SLE2C1_MOUSE_PERITONEAL_CAVITY_B1A_BCELL_UP	GSE23114_WT_VS_SLE2C1_MOUSE_PERITONEAL_CAVITY_B1A_BCELL_UP		131	0.211821	0.848609	0.851064	1	1	2001	tags=21%, list=17%, signal=25%
GOMF_ELECTRON_TRANSFER_ACTIVITY	GOMF_ELECTRON_TRANSFER_ACTIVITY		99	0.223157	0.848602	0.811594	1	1	2699	tags=29%, list=23%, signal=38%
GSE18281_SUBCAPSULAR_CORTICAL_REGION_VS_WHOLE_CORTEX_THYMUS_UP	GSE18281_SUBCAPSULAR_CORTICAL_REGION_VS_WHOLE_CORTEX_THYMUS_UP		157	0.205583	0.848238	0.865471	1	1	1655	tags=19%, list=14%, signal=22%
GOBP_QUINONE_METABOLIC_PROCESS	GOBP_QUINONE_METABOLIC_PROCESS		21	0.308937	0.847814	0.668258	1	1	3324	tags=43%, list=28%, signal=60%
GSE46606_UNSTIM_VS_CD40L_IL2_IL5_3DAY_STIMULATED_IRF4HIGH_SORTED_BCELL_UP	GSE46606_UNSTIM_VS_CD40L_IL2_IL5_3DAY_STIMULATED_IRF4HIGH_SORTED_BCELL_UP		157	0.207929	0.847358	0.900497	1	1	2110	tags=18%, list=18%, signal=22%
GOBP_PROTEIN_MONOUBIQUITINATION	GOBP_PROTEIN_MONOUBIQUITINATION		57	0.24313	0.846794	0.763689	1	1	3193	tags=26%, list=27%, signal=36%
GSE37533_PPARG1_FOXP3_VS_PPARG2_FOXP3_TRANSDUCED_CD4_TCELL_UP	GSE37533_PPARG1_FOXP3_VS_PPARG2_FOXP3_TRANSDUCED_CD4_TCELL_UP		147	0.208337	0.84666	0.85654	1	1	2789	tags=22%, list=24%, signal=29%
GSE15330_LYMPHOID_MULTIPOTENT_VS_MEGAKARYOCYTE_ERYTHROID_PROGENITOR_UP	GSE15330_LYMPHOID_MULTIPOTENT_VS_MEGAKARYOCYTE_ERYTHROID_PROGENITOR_UP		169	0.206054	0.846649	0.872146	1	1	1825	tags=20%, list=15%, signal=23%
GSE24492_LYVE_NEG_VS_POS_MACROPHAGE_UP	GSE24492_LYVE_NEG_VS_POS_MACROPHAGE_UP		142	0.208748	0.846629	0.891626	1	1	2191	tags=21%, list=19%, signal=26%
HP_SPASTIC_PARAPLEGIA	HP_SPASTIC_PARAPLEGIA		104	0.216344	0.846567	0.770751	1	1	2521	tags=26%, list=21%, signal=33%
GOBP_NUCLEOTIDE_EXCISION_REPAIR_DNA_GAP_FILLING	GOBP_NUCLEOTIDE_EXCISION_REPAIR_DNA_GAP_FILLING		18	0.305568	0.846377	0.655087	1	1	1925	tags=17%, list=16%, signal=20%
OVSYANNIKOVA_PBMC_FLUARIX_AGE_55_64YO_RESPONDERS_VS_NONRESPONDERS_0DY_UP	OVSYANNIKOVA_PBMC_FLUARIX_AGE_55_64YO_RESPONDERS_VS_NONRESPONDERS_0DY_UP		23	0.296384	0.84624	0.683805	1	1	3176	tags=39%, list=27%, signal=53%
GOBP_CELLULAR_ALDEHYDE_METABOLIC_PROCESS	GOBP_CELLULAR_ALDEHYDE_METABOLIC_PROCESS		41	0.257366	0.846069	0.742604	1	1	2469	tags=34%, list=21%, signal=43%
GOMF_ATP_DEPENDENT_MICROTUBULE_MOTOR_ACTIVITY	GOMF_ATP_DEPENDENT_MICROTUBULE_MOTOR_ACTIVITY		25	0.286544	0.845851	0.690594	1	1	1358	tags=24%, list=11%, signal=27%
GOBP_WNT_SIGNALING_PATHWAY_CALCIUM_MODULATING_PATHWAY	GOBP_WNT_SIGNALING_PATHWAY_CALCIUM_MODULATING_PATHWAY		34	0.273888	0.845693	0.673352	1	1	3019	tags=35%, list=26%, signal=47%
GOMF_KINESIN_BINDING	GOMF_KINESIN_BINDING		31	0.279372	0.845627	0.704918	1	1	1655	tags=19%, list=14%, signal=22%
HP_ACUTE_LYMPHOBLASTIC_LEUKEMIA	HP_ACUTE_LYMPHOBLASTIC_LEUKEMIA		26	0.289304	0.845251	0.676923	1	1	3676	tags=46%, list=31%, signal=67%
GOBP_POSITIVE_REGULATION_OF_TELOMERE_MAINTENANCE	GOBP_POSITIVE_REGULATION_OF_TELOMERE_MAINTENANCE		45	0.255321	0.84525	0.763736	1	1	4343	tags=44%, list=37%, signal=70%
GSE22527_ANTI_CD3_INVIVO_VS_UNTREATED_MOUSE_TREG_DN	GSE22527_ANTI_CD3_INVIVO_VS_UNTREATED_MOUSE_TREG_DN		168	0.205497	0.844987	0.885321	1	1	2413	tags=22%, list=20%, signal=27%
GSE22432_CONVENTIONAL_CDC_VS_PLASMACYTOID_PDC_UP	GSE22432_CONVENTIONAL_CDC_VS_PLASMACYTOID_PDC_UP		169	0.202445	0.844743	0.905941	1	1	2680	tags=22%, list=23%, signal=28%
GOBP_NEGATIVE_REGULATION_OF_CYTOSKELETON_ORGANIZATION	GOBP_NEGATIVE_REGULATION_OF_CYTOSKELETON_ORGANIZATION		114	0.219309	0.84466	0.848624	1	1	2185	tags=21%, list=18%, signal=26%
PATEL_SKIN_OF_BODY_ZOSTAVAX_AGE_70_93YO_VZV_CHALLENGE_6HR_DN	PATEL_SKIN_OF_BODY_ZOSTAVAX_AGE_70_93YO_VZV_CHALLENGE_6HR_DN		77	0.229247	0.84449	0.815972	1	1	3236	tags=42%, list=27%, signal=57%
GSE13484_UNSTIM_VS_12H_YF17D_VACCINE_STIM_PBMC_UP	GSE13484_UNSTIM_VS_12H_YF17D_VACCINE_STIM_PBMC_UP		164	0.204319	0.843961	0.877273	1	1	2100	tags=19%, list=18%, signal=23%
GSE26488_WT_VS_HDAC7_KO_DOUBLE_POSITIVE_THYMOCYTE_UP	GSE26488_WT_VS_HDAC7_KO_DOUBLE_POSITIVE_THYMOCYTE_UP		140	0.210233	0.843945	0.854077	1	1	2870	tags=31%, list=24%, signal=41%
GOBP_FATTY_ACID_CATABOLIC_PROCESS	GOBP_FATTY_ACID_CATABOLIC_PROCESS		85	0.2282	0.843739	0.817544	1	1	2817	tags=29%, list=24%, signal=38%
HP_ABNORMAL_CARDIAC_ATRIUM_MORPHOLOGY	HP_ABNORMAL_CARDIAC_ATRIUM_MORPHOLOGY		318	0.189971	0.843486	0.984375	1	1	2023	tags=17%, list=17%, signal=20%
GOBP_DOSAGE_COMPENSATION	GOBP_DOSAGE_COMPENSATION		16	0.319219	0.843418	0.679545	1	1	4433	tags=50%, list=38%, signal=80%
GOBP_DEOXYRIBOSE_PHOSPHATE_CATABOLIC_PROCESS	GOBP_DEOXYRIBOSE_PHOSPHATE_CATABOLIC_PROCESS		22	0.300801	0.842846	0.660848	1	1	1323	tags=23%, list=11%, signal=26%
HP_ABNORMALITY_OF_THE_AUDITORY_CANAL	HP_ABNORMALITY_OF_THE_AUDITORY_CANAL		59	0.243383	0.842633	0.760252	1	1	1685	tags=15%, list=14%, signal=18%
GOBP_HISTONE_H3_K9_METHYLATION	GOBP_HISTONE_H3_K9_METHYLATION		28	0.287331	0.842491	0.683511	1	1	2743	tags=36%, list=23%, signal=46%
GSE7568_IL4_TGFB_DEXAMETHASONE_VS_IL4_TGFB_TREATED_MACROPHAGE_UP	GSE7568_IL4_TGFB_DEXAMETHASONE_VS_IL4_TGFB_TREATED_MACROPHAGE_UP		146	0.207286	0.842475	0.880478	1	1	2836	tags=25%, list=24%, signal=33%
GOCC_COPI_COATED_VESICLE	GOCC_COPI_COATED_VESICLE		24	0.294714	0.842158	0.718346	1	1	1541	tags=17%, list=13%, signal=19%
GSE19888_NO_PRETREAT_VS_ADENOSINE_A3R_INHIBITOR_PRETREATED_MAST_CELL_TCELL_MEMBRANES_ACT_UP	GSE19888_NO_PRETREAT_VS_ADENOSINE_A3R_INHIBITOR_PRETREATED_MAST_CELL_TCELL_MEMBRANES_ACT_UP		161	0.206808	0.841608	0.853774	1	1	1358	tags=15%, list=11%, signal=17%
GOBP_LEUKOTRIENE_METABOLIC_PROCESS	GOBP_LEUKOTRIENE_METABOLIC_PROCESS		16	0.330368	0.841298	0.7046	1	1	1389	tags=25%, list=12%, signal=28%
GOMF_CADHERIN_BINDING_INVOLVED_IN_CELL_CELL_ADHESION	GOMF_CADHERIN_BINDING_INVOLVED_IN_CELL_CELL_ADHESION		15	0.328753	0.84101	0.682119	1	1	494	tags=13%, list=4%, signal=14%
GSE26030_TH1_VS_TH17_RESTIMULATED_DAY15_POST_POLARIZATION_DN	GSE26030_TH1_VS_TH17_RESTIMULATED_DAY15_POST_POLARIZATION_DN		157	0.201446	0.840643	0.913265	1	1	2313	tags=25%, list=20%, signal=30%
HP_ABNORMALITY_OF_ADRENAL_MORPHOLOGY	HP_ABNORMALITY_OF_ADRENAL_MORPHOLOGY		64	0.241475	0.840534	0.764706	1	1	1439	tags=17%, list=12%, signal=19%
HP_ABNORMALITY_OF_THE_DIAPHRAGM	HP_ABNORMALITY_OF_THE_DIAPHRAGM		80	0.229422	0.840225	0.79021	1	1	91	tags=4%, list=1%, signal=4%
GSE17721_CTRL_VS_LPS_2H_BMDC_UP	GSE17721_CTRL_VS_LPS_2H_BMDC_UP		161	0.203909	0.840098	0.918033	1	1	3243	tags=31%, list=27%, signal=42%
GOCC_HISTONE_METHYLTRANSFERASE_COMPLEX	GOCC_HISTONE_METHYLTRANSFERASE_COMPLEX		58	0.245392	0.840079	0.736196	1	1	3015	tags=28%, list=26%, signal=37%
GOBP_UNSATURATED_FATTY_ACID_BIOSYNTHETIC_PROCESS	GOBP_UNSATURATED_FATTY_ACID_BIOSYNTHETIC_PROCESS		30	0.279479	0.839171	0.686441	1	1	1598	tags=27%, list=14%, signal=31%
GOBP_NUCLEOBASE_CONTAINING_SMALL_MOLECULE_CATABOLIC_PROCESS	GOBP_NUCLEOBASE_CONTAINING_SMALL_MOLECULE_CATABOLIC_PROCESS		35	0.268172	0.839008	0.72118	1	1	1597	tags=26%, list=14%, signal=30%
GOBP_REGULATION_OF_AUTOPHAGOSOME_ASSEMBLY	GOBP_REGULATION_OF_AUTOPHAGOSOME_ASSEMBLY		35	0.26883	0.838887	0.700831	1	1	2104	tags=23%, list=18%, signal=28%
GSE27786_CD4_TCELL_VS_MONO_MAC_UP	GSE27786_CD4_TCELL_VS_MONO_MAC_UP		162	0.206617	0.838628	0.893204	1	1	2281	tags=23%, list=19%, signal=28%
GOBP_VIRAL_BUDDING	GOBP_VIRAL_BUDDING		20	0.307291	0.838086	0.679901	1	1	2992	tags=30%, list=25%, signal=40%
GOBP_MITOCHONDRION_LOCALIZATION	GOBP_MITOCHONDRION_LOCALIZATION		34	0.273454	0.837913	0.731429	1	1	2251	tags=26%, list=19%, signal=33%
HP_ABNORMALITY_OF_THE_CEREBELLAR_VERMIS	HP_ABNORMALITY_OF_THE_CEREBELLAR_VERMIS		213	0.199103	0.837114	0.906433	1	1	2770	tags=25%, list=23%, signal=32%
GOBP_NUCLEOSIDE_TRIPHOSPHATE_BIOSYNTHETIC_PROCESS	GOBP_NUCLEOSIDE_TRIPHOSPHATE_BIOSYNTHETIC_PROCESS		53	0.241991	0.836754	0.780864	1	1	3270	tags=38%, list=28%, signal=52%
GSE2706_UNSTIM_VS_2H_LPS_AND_R848_DC_UP	GSE2706_UNSTIM_VS_2H_LPS_AND_R848_DC_UP		133	0.211408	0.83633	0.871369	1	1	3373	tags=33%, list=29%, signal=46%
GSE28737_BCL6_HET_VS_BCL6_KO_FOLLICULAR_BCELL_UP	GSE28737_BCL6_HET_VS_BCL6_KO_FOLLICULAR_BCELL_UP		156	0.205328	0.836299	0.882353	1	1	1436	tags=15%, list=12%, signal=17%
SIRNA_EIF4GI_DN	SIRNA_EIF4GI_DN		75	0.232527	0.836269	0.809365	1	1	1356	tags=15%, list=11%, signal=16%
GOMF_PROTEIN_TRANSPORTER_ACTIVITY	GOMF_PROTEIN_TRANSPORTER_ACTIVITY		20	0.301644	0.836238	0.673809	1	1	1758	tags=35%, list=15%, signal=41%
HP_VERTEBRAL_FUSION	HP_VERTEBRAL_FUSION		41	0.257789	0.836189	0.738903	1	1	467	tags=12%, list=4%, signal=13%
GOMF_THREONINE_TYPE_PEPTIDASE_ACTIVITY	GOMF_THREONINE_TYPE_PEPTIDASE_ACTIVITY		17	0.317461	0.836185	0.699507	1	1	1610	tags=24%, list=14%, signal=27%
HP_ABNORMALITY_OF_THE_CURVATURE_OF_THE_CORNEA	HP_ABNORMALITY_OF_THE_CURVATURE_OF_THE_CORNEA		192	0.199335	0.83594	0.904523	1	1	2098	tags=20%, list=18%, signal=24%
HP_ABNORMAL_MORPHOLOGY_OF_THE_RADIUS	HP_ABNORMAL_MORPHOLOGY_OF_THE_RADIUS		43	0.255389	0.835898	0.72807	1	1	2448	tags=30%, list=21%, signal=38%
GOBP_APOPTOTIC_DNA_FRAGMENTATION	GOBP_APOPTOTIC_DNA_FRAGMENTATION		18	0.3148	0.835793	0.71066	1	1	263	tags=11%, list=2%, signal=11%
GOMF_SYNTAXIN_BINDING	GOMF_SYNTAXIN_BINDING		53	0.24115	0.835398	0.801775	1	1	2028	tags=23%, list=17%, signal=27%
GSE26669_CTRL_VS_COSTIM_BLOCK_MLR_CD8_TCELL_DN	GSE26669_CTRL_VS_COSTIM_BLOCK_MLR_CD8_TCELL_DN		162	0.202467	0.835322	0.890909	1	1	1493	tags=14%, list=13%, signal=15%
GOMF_CYCLASE_ACTIVITY	GOMF_CYCLASE_ACTIVITY		15	0.326842	0.835023	0.675294	1	1	633	tags=20%, list=5%, signal=21%
HP_CEREBELLAR_MALFORMATION	HP_CEREBELLAR_MALFORMATION		273	0.189878	0.834907	0.986928	1	1	2770	tags=25%, list=23%, signal=31%
GSE411_100MIN_VS_400MIN_IL6_STIM_SOCS3_KO_MACROPHAGE_UP	GSE411_100MIN_VS_400MIN_IL6_STIM_SOCS3_KO_MACROPHAGE_UP		173	0.200308	0.83485	0.886598	1	1	2004	tags=20%, list=17%, signal=23%
HP_ABNORMALITY_OF_SMALL_INTESTINAL_VILLUS_MORPHOLOGY	HP_ABNORMALITY_OF_SMALL_INTESTINAL_VILLUS_MORPHOLOGY		15	0.316135	0.834807	0.683824	1	1	626	tags=13%, list=5%, signal=14%
HP_DEEPLY_SET_EYE	HP_DEEPLY_SET_EYE		158	0.202975	0.834338	0.90099	1	1	1281	tags=12%, list=11%, signal=13%
GSE27291_0H_VS_6H_STIM_GAMMADELTA_TCELL_UP	GSE27291_0H_VS_6H_STIM_GAMMADELTA_TCELL_UP		127	0.206458	0.83417	0.900415	1	1	2395	tags=27%, list=20%, signal=33%
GSE1925_3H_VS_24H_IFNG_STIM_IFNG_PRIMED_MACROPHAGE_DN	GSE1925_3H_VS_24H_IFNG_STIM_IFNG_PRIMED_MACROPHAGE_DN		156	0.204224	0.834154	0.915612	1	1	2281	tags=22%, list=19%, signal=27%
HP_NEOPLASM_OF_THE_ORAL_CAVITY	HP_NEOPLASM_OF_THE_ORAL_CAVITY		44	0.254836	0.833992	0.748485	1	1	3437	tags=36%, list=29%, signal=51%
GSE20727_H2O2_VS_ROS_INHIBITOR_TREATED_DC_DN	GSE20727_H2O2_VS_ROS_INHIBITOR_TREATED_DC_DN		157	0.201098	0.833923	0.90678	1	1	1955	tags=18%, list=17%, signal=22%
GOBP_REGULATION_OF_CELLULAR_AMINE_METABOLIC_PROCESS	GOBP_REGULATION_OF_CELLULAR_AMINE_METABOLIC_PROCESS		54	0.241899	0.833652	0.772861	1	1	526	tags=6%, list=4%, signal=6%
GSE17721_CTRL_VS_PAM3CSK4_8H_BMDC_UP	GSE17721_CTRL_VS_PAM3CSK4_8H_BMDC_UP		165	0.204278	0.833233	0.902326	1	1	2541	tags=26%, list=22%, signal=33%
GSE1460_INTRATHYMIC_T_PROGENITOR_VS_CD4_THYMOCYTE_UP	GSE1460_INTRATHYMIC_T_PROGENITOR_VS_CD4_THYMOCYTE_UP		159	0.204408	0.833179	0.954082	1	1	2454	tags=25%, list=21%, signal=31%
GSE20198_UNTREATED_VS_IL12_IL18_TREATED_ACT_CD4_TCELL_DN	GSE20198_UNTREATED_VS_IL12_IL18_TREATED_ACT_CD4_TCELL_DN		168	0.200271	0.833047	0.913044	1	1	2125	tags=21%, list=18%, signal=26%
KEGG_GLYCOSAMINOGLYCAN_BIOSYNTHESIS_HEPARAN_SULFATE	KEGG_GLYCOSAMINOGLYCAN_BIOSYNTHESIS_HEPARAN_SULFATE		17	0.30966	0.833017	0.684932	1	1	1808	tags=24%, list=15%, signal=28%
HP_PERIAURICULAR_SKIN_PITS	HP_PERIAURICULAR_SKIN_PITS		34	0.26627	0.832592	0.727273	1	1	722	tags=9%, list=6%, signal=9%
GOCC_PRC1_COMPLEX	GOCC_PRC1_COMPLEX		15	0.32311	0.832282	0.684932	1	1	4807	tags=53%, list=41%, signal=90%
GSE37301_COMMON_LYMPHOID_PROGENITOR_VS_CD4_TCELL_DN	GSE37301_COMMON_LYMPHOID_PROGENITOR_VS_CD4_TCELL_DN		170	0.201929	0.832113	0.910526	1	1	1489	tags=16%, list=13%, signal=18%
HP_SHORT_RIBS	HP_SHORT_RIBS		49	0.249806	0.832028	0.787425	1	1	1430	tags=18%, list=12%, signal=21%
GOBP_POSITIVE_REGULATION_OF_SMOOTHENED_SIGNALING_PATHWAY	GOBP_POSITIVE_REGULATION_OF_SMOOTHENED_SIGNALING_PATHWAY		30	0.267263	0.831989	0.727034	1	1	1828	tags=23%, list=15%, signal=28%
HP_ABNORMALITY_OF_THE_TARSAL_BONES	HP_ABNORMALITY_OF_THE_TARSAL_BONES		76	0.228492	0.831744	0.781457	1	1	672	tags=7%, list=6%, signal=7%
GOBP_CARDIAC_ATRIUM_MORPHOGENESIS	GOBP_CARDIAC_ATRIUM_MORPHOGENESIS		21	0.301089	0.830761	0.73201	1	1	1226	tags=14%, list=10%, signal=16%
HP_RESPIRATORY_DISTRESS	HP_RESPIRATORY_DISTRESS		131	0.209715	0.830531	0.869955	1	1	1898	tags=20%, list=16%, signal=23%
GSE3982_EOSINOPHIL_VS_EFF_MEMORY_CD4_TCELL_DN	GSE3982_EOSINOPHIL_VS_EFF_MEMORY_CD4_TCELL_DN		155	0.201972	0.830273	0.917355	1	1	1632	tags=17%, list=14%, signal=19%
HP_HYDROURETER	HP_HYDROURETER		59	0.236649	0.830123	0.796774	1	1	3463	tags=36%, list=29%, signal=50%
HP_PATENT_DUCTUS_ARTERIOSUS	HP_PATENT_DUCTUS_ARTERIOSUS		210	0.197564	0.829862	0.910714	1	1	2535	tags=20%, list=21%, signal=25%
GSE11864_UNTREATED_VS_CSF1_IFNG_PAM3CYS_IN_MAC_DN	GSE11864_UNTREATED_VS_CSF1_IFNG_PAM3CYS_IN_MAC_DN		146	0.203526	0.829735	0.908696	1	1	1531	tags=14%, list=13%, signal=16%
GSE21546_ELK1_KO_VS_SAP1A_KO_AND_ELK1_KO_DP_THYMOCYTES_DN	GSE21546_ELK1_KO_VS_SAP1A_KO_AND_ELK1_KO_DP_THYMOCYTES_DN		167	0.200303	0.829672	0.909524	1	1	3844	tags=40%, list=33%, signal=58%
HP_PROXIMAL_MUSCLE_WEAKNESS	HP_PROXIMAL_MUSCLE_WEAKNESS		134	0.204982	0.829576	0.914027	1	1	1440	tags=12%, list=12%, signal=13%
GSE27786_LIN_NEG_VS_BCELL_UP	GSE27786_LIN_NEG_VS_BCELL_UP		155	0.20175	0.829404	0.900433	1	1	1302	tags=14%, list=11%, signal=15%
GOCC_MITOTIC_SPINDLE	GOCC_MITOTIC_SPINDLE		123	0.210867	0.829223	0.868644	1	1	2136	tags=15%, list=18%, signal=19%
GOBP_DEMETHYLATION	GOBP_DEMETHYLATION		47	0.246961	0.828954	0.772455	1	1	1684	tags=15%, list=14%, signal=17%
HP_MALE_HYPOGONADISM	HP_MALE_HYPOGONADISM		25	0.284041	0.828714	0.702413	1	1	603	tags=8%, list=5%, signal=8%
GOMF_LYSINE_N_METHYLTRANSFERASE_ACTIVITY	GOMF_LYSINE_N_METHYLTRANSFERASE_ACTIVITY		47	0.249017	0.828686	0.766272	1	1	3090	tags=30%, list=26%, signal=40%
GSE411_UNSTIM_VS_400MIN_IL6_STIM_MACROPHAGE_DN	GSE411_UNSTIM_VS_400MIN_IL6_STIM_MACROPHAGE_DN		170	0.201485	0.828479	0.901099	1	1	2591	tags=27%, list=22%, signal=34%
GSE10239_MEMORY_VS_DAY4.5_EFF_CD8_TCELL_UP	GSE10239_MEMORY_VS_DAY4.5_EFF_CD8_TCELL_UP		138	0.210496	0.828187	0.884444	1	1	2249	tags=21%, list=19%, signal=26%
HP_AXONAL_DEGENERATION	HP_AXONAL_DEGENERATION		16	0.316303	0.827808	0.692825	1	1	1756	tags=25%, list=15%, signal=29%
HP_POLYPHAGIA	HP_POLYPHAGIA		37	0.2569	0.827409	0.733333	1	1	1281	tags=19%, list=11%, signal=21%
HP_BASAL_CELL_CARCINOMA	HP_BASAL_CELL_CARCINOMA		40	0.255678	0.827068	0.739521	1	1	3219	tags=40%, list=27%, signal=55%
HP_PREAURICULAR_SKIN_TAG	HP_PREAURICULAR_SKIN_TAG		50	0.241153	0.826991	0.765823	1	1	1306	tags=16%, list=11%, signal=18%
GSE411_UNSTIM_VS_100MIN_IL6_STIM_SOCS3_KO_MACROPHAGE_UP	GSE411_UNSTIM_VS_100MIN_IL6_STIM_SOCS3_KO_MACROPHAGE_UP		165	0.203863	0.826604	0.929907	1	1	2599	tags=23%, list=22%, signal=29%
GOBP_CALCIUM_MEDIATED_SIGNALING_USING_INTRACELLULAR_CALCIUM_SOURCE	GOBP_CALCIUM_MEDIATED_SIGNALING_USING_INTRACELLULAR_CALCIUM_SOURCE		17	0.309718	0.826399	0.715311	1	1	2100	tags=41%, list=18%, signal=50%
HP_ABNORMALITY_OF_CORNEAL_SIZE	HP_ABNORMALITY_OF_CORNEAL_SIZE		117	0.207921	0.825364	0.887681	1	1	467	tags=5%, list=4%, signal=5%
GOBP_RIBONUCLEOSIDE_TRIPHOSPHATE_METABOLIC_PROCESS	GOBP_RIBONUCLEOSIDE_TRIPHOSPHATE_METABOLIC_PROCESS		56	0.239764	0.825344	0.797342	1	1	1909	tags=20%, list=16%, signal=23%
GSE3039_NKT_CELL_VS_B1_BCELL_DN	GSE3039_NKT_CELL_VS_B1_BCELL_DN		171	0.19913	0.825293	0.938095	1	1	2870	tags=31%, list=24%, signal=40%
HP_SPINAL_MUSCULAR_ATROPHY	HP_SPINAL_MUSCULAR_ATROPHY		21	0.302949	0.82515	0.721053	1	1	1142	tags=14%, list=10%, signal=16%
GOBP_PROTEIN_ACYLATION	GOBP_PROTEIN_ACYLATION		192	0.191945	0.825148	0.925287	1	1	2746	tags=23%, list=23%, signal=29%
HP_TACHYPNEA	HP_TACHYPNEA		58	0.245776	0.82494	0.753012	1	1	2574	tags=22%, list=22%, signal=29%
GSE17721_CTRL_VS_POLYIC_4H_BMDC_UP	GSE17721_CTRL_VS_POLYIC_4H_BMDC_UP		168	0.197231	0.824555	0.919431	1	1	2122	tags=17%, list=18%, signal=20%
GSE29618_PRE_VS_DAY7_POST_TIV_FLU_VACCINE_PDC_UP	GSE29618_PRE_VS_DAY7_POST_TIV_FLU_VACCINE_PDC_UP		123	0.210068	0.824544	0.890244	1	1	830	tags=9%, list=7%, signal=10%
HP_HEAD_TREMOR	HP_HEAD_TREMOR		23	0.287419	0.824415	0.71599	1	1	4582	tags=70%, list=39%, signal=113%
THAKAR_PBMC_INACTIVATED_INFLUENZA_AGE_21_30YO_NONRESPONDER_28DY_UP	THAKAR_PBMC_INACTIVATED_INFLUENZA_AGE_21_30YO_NONRESPONDER_28DY_UP		151	0.202166	0.824382	0.935644	1	1	2291	tags=19%, list=19%, signal=23%
HP_LATE_ONSET	HP_LATE_ONSET		18	0.308777	0.824349	0.728155	1	1	293	tags=11%, list=2%, signal=11%
GOBP_PROTEIN_CONTAINING_COMPLEX_LOCALIZATION	GOBP_PROTEIN_CONTAINING_COMPLEX_LOCALIZATION		213	0.195632	0.824312	0.921053	1	1	2207	tags=19%, list=19%, signal=23%
GOBP_PROTEIN_DEPOLYMERIZATION	GOBP_PROTEIN_DEPOLYMERIZATION		89	0.223583	0.823488	0.792	1	1	1529	tags=17%, list=13%, signal=19%
GSE2128_CTRL_VS_MIMETOPE_NEGATIVE_SELECTION_DP_THYMOCYTE_C57BL6_DN	GSE2128_CTRL_VS_MIMETOPE_NEGATIVE_SELECTION_DP_THYMOCYTE_C57BL6_DN		158	0.202605	0.823	0.866667	1	1	3074	tags=35%, list=26%, signal=46%
HP_APLASIA_HYPOPLASIA_AFFECTING_THE_FUNDUS	HP_APLASIA_HYPOPLASIA_AFFECTING_THE_FUNDUS		77	0.224776	0.822985	0.820069	1	1	957	tags=9%, list=8%, signal=10%
GOBP_VIRAL_BUDDING_VIA_HOST_ESCRT_COMPLEX	GOBP_VIRAL_BUDDING_VIA_HOST_ESCRT_COMPLEX		15	0.323033	0.822931	0.6925	1	1	2992	tags=33%, list=25%, signal=45%
HP_LIMB_UNDERGROWTH	HP_LIMB_UNDERGROWTH		184	0.197318	0.822825	0.916667	1	1	1678	tags=15%, list=14%, signal=17%
GOBP_COVALENT_CHROMATIN_MODIFICATION	GOBP_COVALENT_CHROMATIN_MODIFICATION		375	0.183433	0.822666	0.978947	1	1	2765	tags=19%, list=23%, signal=25%
GOBP_MITOCHONDRIAL_GENOME_MAINTENANCE	GOBP_MITOCHONDRIAL_GENOME_MAINTENANCE		17	0.317075	0.822652	0.7	1	1	3315	tags=35%, list=28%, signal=49%
HP_ABNORMALITY_OF_THE_ACETABULUM	HP_ABNORMALITY_OF_THE_ACETABULUM		55	0.234396	0.822074	0.778878	1	1	1284	tags=13%, list=11%, signal=14%
GOBP_ENERGY_HOMEOSTASIS	GOBP_ENERGY_HOMEOSTASIS		27	0.279529	0.822004	0.72679	1	1	2185	tags=30%, list=18%, signal=36%
GSE6674_ANTI_IGM_VS_ANTI_IGM_AND_CPG_STIM_BCELL_UP	GSE6674_ANTI_IGM_VS_ANTI_IGM_AND_CPG_STIM_BCELL_UP		163	0.198985	0.821716	0.897196	1	1	2462	tags=23%, list=21%, signal=28%
GOBP_N_TERMINAL_PROTEIN_AMINO_ACID_MODIFICATION	GOBP_N_TERMINAL_PROTEIN_AMINO_ACID_MODIFICATION		22	0.294321	0.821632	0.732824	1	1	3126	tags=32%, list=26%, signal=43%
GOBP_REGULATION_OF_CARBOHYDRATE_CATABOLIC_PROCESS	GOBP_REGULATION_OF_CARBOHYDRATE_CATABOLIC_PROCESS		68	0.228688	0.821499	0.802508	1	1	264	tags=6%, list=2%, signal=6%
THAKAR_PBMC_INACTIVATED_INFLUENZA_AGE_21_30YO_RESPONDERS_28DY_UP	THAKAR_PBMC_INACTIVATED_INFLUENZA_AGE_21_30YO_RESPONDERS_28DY_UP		352	0.180827	0.82145	0.969388	1	1	3536	tags=34%, list=30%, signal=46%
GSE2197_IMMUNOSUPPRESSIVE_DNA_VS_UNTREATEDIN_DC_DN	GSE2197_IMMUNOSUPPRESSIVE_DNA_VS_UNTREATEDIN_DC_DN		164	0.200431	0.821334	0.912037	1	1	2232	tags=19%, list=19%, signal=23%
HP_RAGGED_RED_MUSCLE_FIBERS	HP_RAGGED_RED_MUSCLE_FIBERS		35	0.265584	0.821069	0.759259	1	1	3730	tags=34%, list=32%, signal=50%
HP_ABNORMAL_CIRCULATING_FATTY_ACID_CONCENTRATION	HP_ABNORMAL_CIRCULATING_FATTY_ACID_CONCENTRATION		40	0.25361	0.821046	0.766854	1	1	2730	tags=25%, list=23%, signal=32%
GSE39864_WT_VS_GATA3_KO_TREG_DN	GSE39864_WT_VS_GATA3_KO_TREG_DN		168	0.198204	0.820641	0.92268	1	1	2560	tags=21%, list=22%, signal=27%
HP_INTESTINAL_PSEUDO_OBSTRUCTION	HP_INTESTINAL_PSEUDO_OBSTRUCTION		20	0.297604	0.820617	0.741007	1	1	2849	tags=30%, list=24%, signal=39%
GOBP_NEGATIVE_REGULATION_OF_LIPID_CATABOLIC_PROCESS	GOBP_NEGATIVE_REGULATION_OF_LIPID_CATABOLIC_PROCESS		17	0.31218	0.820518	0.688249	1	1	1524	tags=24%, list=13%, signal=27%
GOBP_PEPTIDYL_ARGININE_MODIFICATION	GOBP_PEPTIDYL_ARGININE_MODIFICATION		19	0.299976	0.820446	0.708434	1	1	3919	tags=42%, list=33%, signal=63%
GOBP_C4_DICARBOXYLATE_TRANSPORT	GOBP_C4_DICARBOXYLATE_TRANSPORT		15	0.321218	0.820414	0.691589	1	1	995	tags=20%, list=8%, signal=22%
GSE5142_HTERT_TRANSDUCED_VS_CTRL_CD8_TCELL_LATE_PASSAGE_CLONE_UP	GSE5142_HTERT_TRANSDUCED_VS_CTRL_CD8_TCELL_LATE_PASSAGE_CLONE_UP		173	0.197406	0.820307	0.940092	1	1	1568	tags=18%, list=13%, signal=20%
GOBP_POSITIVE_REGULATION_OF_INSULIN_SECRETION_INVOLVED_IN_CELLULAR_RESPONSE_TO_GLUCOSE_STIMULUS	GOBP_POSITIVE_REGULATION_OF_INSULIN_SECRETION_INVOLVED_IN_CELLULAR_RESPONSE_TO_GLUCOSE_STIMULUS		21	0.293627	0.820296	0.698851	1	1	560	tags=14%, list=5%, signal=15%
GSE15330_WT_VS_IKAROS_KO_LYMPHOID_MULTIPOTENT_PROGENITOR_DN	GSE15330_WT_VS_IKAROS_KO_LYMPHOID_MULTIPOTENT_PROGENITOR_DN		163	0.198255	0.819985	0.930131	1	1	3140	tags=26%, list=27%, signal=35%
HP_ABNORMAL_CARDIAC_SEPTUM_MORPHOLOGY	HP_ABNORMAL_CARDIAC_SEPTUM_MORPHOLOGY		458	0.180111	0.819886	0.988889	1	1	2577	tags=20%, list=22%, signal=25%
GOMF_BETA_TUBULIN_BINDING	GOMF_BETA_TUBULIN_BINDING		31	0.272812	0.819789	0.718421	1	1	1270	tags=16%, list=11%, signal=18%
HP_APLASIA_HYPOPLASIA_OF_THE_ABDOMINAL_WALL_MUSCULATURE	HP_APLASIA_HYPOPLASIA_OF_THE_ABDOMINAL_WALL_MUSCULATURE		30	0.272258	0.819634	0.745902	1	1	358	tags=10%, list=3%, signal=10%
HP_MENINGOCELE	HP_MENINGOCELE		38	0.25293	0.819209	0.759668	1	1	659	tags=11%, list=6%, signal=11%
GSE17721_4_VS_24H_GARDIQUIMOD_BMDC_DN	GSE17721_4_VS_24H_GARDIQUIMOD_BMDC_DN		166	0.198534	0.818966	0.932735	1	1	3445	tags=36%, list=29%, signal=49%
GSE43863_NAIVE_VS_MEMORY_LY6C_INT_CXCR5POS_CD4_TCELL_D150_LCMV_DN	GSE43863_NAIVE_VS_MEMORY_LY6C_INT_CXCR5POS_CD4_TCELL_D150_LCMV_DN		168	0.197102	0.818795	0.93401	1	1	3511	tags=35%, list=30%, signal=49%
GOBP_INSULIN_LIKE_GROWTH_FACTOR_RECEPTOR_SIGNALING_PATHWAY	GOBP_INSULIN_LIKE_GROWTH_FACTOR_RECEPTOR_SIGNALING_PATHWAY		21	0.288698	0.818783	0.721053	1	1	942	tags=10%, list=8%, signal=10%
GOCC_ESCRT_COMPLEX	GOCC_ESCRT_COMPLEX		19	0.305963	0.818707	0.731051	1	1	2992	tags=32%, list=25%, signal=42%
KEGG_INOSITOL_PHOSPHATE_METABOLISM	KEGG_INOSITOL_PHOSPHATE_METABOLISM		46	0.241452	0.818685	0.776074	1	1	2335	tags=22%, list=20%, signal=27%
GOBP_REGULATION_OF_PROTEIN_TARGETING_TO_MITOCHONDRION	GOBP_REGULATION_OF_PROTEIN_TARGETING_TO_MITOCHONDRION		40	0.246884	0.818604	0.785714	1	1	1064	tags=13%, list=9%, signal=14%
GOBP_NEGATIVE_REGULATION_OF_PROTEIN_ACETYLATION	GOBP_NEGATIVE_REGULATION_OF_PROTEIN_ACETYLATION		17	0.308411	0.818589	0.728205	1	1	1664	tags=24%, list=14%, signal=27%
GSE22935_WT_VS_MYD88_KO_MACROPHAGE_48H_MBOVIS_BCG_STIM_UP	GSE22935_WT_VS_MYD88_KO_MACROPHAGE_48H_MBOVIS_BCG_STIM_UP		141	0.202744	0.818547	0.923423	1	1	3112	tags=30%, list=26%, signal=41%
HP_ABNORMAL_OVARIAN_PHYSIOLOGY	HP_ABNORMAL_OVARIAN_PHYSIOLOGY		60	0.23384	0.818478	0.804598	1	1	2253	tags=25%, list=19%, signal=31%
HP_APLASIA_HYPOPLASIA_INVOLVING_THE_FEMORAL_HEAD_AND_NECK	HP_APLASIA_HYPOPLASIA_INVOLVING_THE_FEMORAL_HEAD_AND_NECK		30	0.269126	0.817987	0.760204	1	1	1866	tags=17%, list=16%, signal=20%
GOBP_SMOOTH_MUSCLE_TISSUE_DEVELOPMENT	GOBP_SMOOTH_MUSCLE_TISSUE_DEVELOPMENT		16	0.306308	0.817943	0.706977	1	1	1234	tags=19%, list=10%, signal=21%
GOBP_PROTEIN_K48_LINKED_UBIQUITINATION	GOBP_PROTEIN_K48_LINKED_UBIQUITINATION		49	0.245836	0.817739	0.755952	1	1	3123	tags=31%, list=26%, signal=41%
HP_OPEN_BITE	HP_OPEN_BITE		36	0.258626	0.817631	0.757746	1	1	1284	tags=17%, list=11%, signal=19%
GOBP_GENERATION_OF_PRECURSOR_METABOLITES_AND_ENERGY	GOBP_GENERATION_OF_PRECURSOR_METABOLITES_AND_ENERGY		387	0.183224	0.817591	1	1	1	2270	tags=20%, list=19%, signal=24%
HP_FULL_CHEEKS	HP_FULL_CHEEKS		90	0.210904	0.817585	0.847826	1	1	2872	tags=24%, list=24%, signal=32%
GSE29617_CTRL_VS_DAY3_TIV_FLU_VACCINE_PBMC_2008_DN	GSE29617_CTRL_VS_DAY3_TIV_FLU_VACCINE_PBMC_2008_DN		159	0.199021	0.817494	0.920792	1	1	2392	tags=23%, list=20%, signal=28%
GOBP_REGULATION_OF_CILIUM_ASSEMBLY	GOBP_REGULATION_OF_CILIUM_ASSEMBLY		40	0.250758	0.817362	0.773134	1	1	2288	tags=28%, list=19%, signal=34%
GOBP_FLUID_TRANSPORT	GOBP_FLUID_TRANSPORT		18	0.304181	0.817358	0.708531	1	1	801	tags=17%, list=7%, signal=18%
HP_ARTHROGRYPOSIS_MULTIPLEX_CONGENITA	HP_ARTHROGRYPOSIS_MULTIPLEX_CONGENITA		81	0.220512	0.817337	0.861017	1	1	672	tags=6%, list=6%, signal=7%
GOBP_NUCLEOSOME_ORGANIZATION	GOBP_NUCLEOSOME_ORGANIZATION		91	0.216577	0.816727	0.866412	1	1	3620	tags=32%, list=31%, signal=46%
HP_HYPEREXTENSIBILITY_OF_THE_KNEE	HP_HYPEREXTENSIBILITY_OF_THE_KNEE		24	0.282991	0.8167	0.715405	1	1	927	tags=13%, list=8%, signal=14%
HP_PANCREATIC_FIBROSIS	HP_PANCREATIC_FIBROSIS		15	0.318532	0.816329	0.684337	1	1	4011	tags=53%, list=34%, signal=81%
GSE27786_LIN_NEG_VS_BCELL_DN	GSE27786_LIN_NEG_VS_BCELL_DN		162	0.19619	0.815515	0.941176	1	1	1467	tags=14%, list=12%, signal=16%
HP_ABNORMAL_FOREARM_BONE_MORPHOLOGY	HP_ABNORMAL_FOREARM_BONE_MORPHOLOGY		73	0.221083	0.81549	0.821429	1	1	2489	tags=29%, list=21%, signal=36%
HP_OVERGROWTH	HP_OVERGROWTH		20	0.301222	0.815304	0.72209	1	1	3015	tags=50%, list=26%, signal=67%
HP_EXTERNAL_OPHTHALMOPLEGIA	HP_EXTERNAL_OPHTHALMOPLEGIA		36	0.261314	0.814469	0.745592	1	1	2796	tags=31%, list=24%, signal=40%
GSE21546_ELK1_KO_VS_SAP1A_KO_AND_ELK1_KO_ANTI_CD3_STIM_DP_THYMOCYTES_UP	GSE21546_ELK1_KO_VS_SAP1A_KO_AND_ELK1_KO_ANTI_CD3_STIM_DP_THYMOCYTES_UP		156	0.20248	0.81412	0.922705	1	1	3745	tags=36%, list=32%, signal=52%
GSE23695_CD57_POS_VS_NEG_NK_CELL_UP	GSE23695_CD57_POS_VS_NEG_NK_CELL_UP		180	0.19508	0.813402	0.944162	1	1	2567	tags=23%, list=22%, signal=29%
GSE25085_FETAL_LIVER_VS_ADULT_BM_SP4_THYMIC_IMPLANT_UP	GSE25085_FETAL_LIVER_VS_ADULT_BM_SP4_THYMIC_IMPLANT_UP		177	0.195185	0.813295	0.934343	1	1	2980	tags=32%, list=25%, signal=42%
GSE11961_FOLLICULAR_BCELL_VS_MEMORY_BCELL_DAY7_DN	GSE11961_FOLLICULAR_BCELL_VS_MEMORY_BCELL_DAY7_DN		171	0.198034	0.813131	0.919192	1	1	2539	tags=26%, list=21%, signal=32%
HP_ABNORMALITY_OF_HAND_JOINT_MOBILITY	HP_ABNORMALITY_OF_HAND_JOINT_MOBILITY		25	0.285247	0.813035	0.728532	1	1	31	tags=4%, list=0%, signal=4%
KEGG_METABOLISM_OF_XENOBIOTICS_BY_CYTOCHROME_P450	KEGG_METABOLISM_OF_XENOBIOTICS_BY_CYTOCHROME_P450		15	0.317282	0.812557	0.715576	1	1	1071	tags=20%, list=9%, signal=22%
HP_GLUCOSE_INTOLERANCE	HP_GLUCOSE_INTOLERANCE		276	0.183939	0.812527	0.979592	1	1	3102	tags=29%, list=26%, signal=38%
GSE6674_CPG_VS_CPG_AND_ANTI_IGM_STIM_BCELL_UP	GSE6674_CPG_VS_CPG_AND_ANTI_IGM_STIM_BCELL_UP		160	0.198033	0.812231	0.92228	1	1	1574	tags=14%, list=13%, signal=16%
GSE15330_MEGAKARYOCYTE_ERYTHROID_PROGENITOR_VS_PRO_BCELL_DN	GSE15330_MEGAKARYOCYTE_ERYTHROID_PROGENITOR_VS_PRO_BCELL_DN		165	0.196562	0.811892	0.927536	1	1	3157	tags=30%, list=27%, signal=41%
GSE18791_CTRL_VS_NEWCASTLE_VIRUS_DC_2H_UP	GSE18791_CTRL_VS_NEWCASTLE_VIRUS_DC_2H_UP		137	0.201612	0.811692	0.900452	1	1	3117	tags=35%, list=26%, signal=47%
GSE29618_PRE_VS_DAY7_POST_TIV_FLU_VACCINE_BCELL_DN	GSE29618_PRE_VS_DAY7_POST_TIV_FLU_VACCINE_BCELL_DN		142	0.201657	0.811691	0.93133	1	1	2416	tags=21%, list=20%, signal=26%
GSE5099_MONOCYTE_VS_ALTERNATIVE_M2_MACROPHAGE_UP	GSE5099_MONOCYTE_VS_ALTERNATIVE_M2_MACROPHAGE_UP		110	0.208311	0.811482	0.904762	1	1	1369	tags=13%, list=12%, signal=14%
GOMF_TRANSLATION_INITIATION_FACTOR_BINDING	GOMF_TRANSLATION_INITIATION_FACTOR_BINDING		26	0.274358	0.811149	0.751295	1	1	2294	tags=31%, list=19%, signal=38%
GSE11864_UNTREATED_VS_CSF1_PAM3CYS_IN_MAC_UP	GSE11864_UNTREATED_VS_CSF1_PAM3CYS_IN_MAC_UP		154	0.19817	0.810942	0.924779	1	1	2584	tags=24%, list=22%, signal=30%
GOBP_PURINE_CONTAINING_COMPOUND_BIOSYNTHETIC_PROCESS	GOBP_PURINE_CONTAINING_COMPOUND_BIOSYNTHETIC_PROCESS		140	0.200144	0.81069	0.917431	1	1	1760	tags=16%, list=15%, signal=19%
NAKAYA_MYELOID_DENDRITIC_CELL_FLUARIX_FLUVIRIN_AGE_18_50YO_7DY_UP	NAKAYA_MYELOID_DENDRITIC_CELL_FLUARIX_FLUVIRIN_AGE_18_50YO_7DY_UP		326	0.180856	0.810493	0.975207	1	1	2035	tags=17%, list=17%, signal=21%
HP_ABNORMALITY_OF_THE_INTRAHEPATIC_BILE_DUCT	HP_ABNORMALITY_OF_THE_INTRAHEPATIC_BILE_DUCT		16	0.309408	0.810235	0.724057	1	1	2555	tags=38%, list=22%, signal=48%
HP_SPINAL_CORD_LESION	HP_SPINAL_CORD_LESION		24	0.284017	0.810206	0.743781	1	1	2773	tags=33%, list=23%, signal=43%
HP_ABNORMAL_METABOLISM	HP_ABNORMAL_METABOLISM		92	0.21388	0.810103	0.874539	1	1	866	tags=9%, list=7%, signal=9%
GSE22886_NAIVE_CD4_TCELL_VS_MEMORY_TCELL_DN	GSE22886_NAIVE_CD4_TCELL_VS_MEMORY_TCELL_DN		169	0.199955	0.810026	0.936893	1	1	3133	tags=28%, list=27%, signal=38%
GSE37533_PPARG2_FOXP3_VS_FOXP3_TRANSDUCED_CD4_TCELL_PIOGLITAZONE_TREATED_DN	GSE37533_PPARG2_FOXP3_VS_FOXP3_TRANSDUCED_CD4_TCELL_PIOGLITAZONE_TREATED_DN		154	0.200258	0.809862	0.907834	1	1	2056	tags=19%, list=17%, signal=23%
GSE36891_UNSTIM_VS_PAM_TLR2_STIM_PERITONEAL_MACROPHAGE_UP	GSE36891_UNSTIM_VS_PAM_TLR2_STIM_PERITONEAL_MACROPHAGE_UP		178	0.194258	0.80985	0.959184	1	1	2342	tags=24%, list=20%, signal=29%
GOMF_TRANSFERASE_ACTIVITY_TRANSFERRING_SULFUR_CONTAINING_GROUPS	GOMF_TRANSFERASE_ACTIVITY_TRANSFERRING_SULFUR_CONTAINING_GROUPS		35	0.253612	0.80976	0.758808	1	1	761	tags=11%, list=6%, signal=12%
HP_PIERRE_ROBIN_SEQUENCE	HP_PIERRE_ROBIN_SEQUENCE		15	0.31317	0.809631	0.723785	1	1	1271	tags=20%, list=11%, signal=22%
HP_WIDE_NOSE	HP_WIDE_NOSE		71	0.223515	0.808951	0.843972	1	1	148	tags=4%, list=1%, signal=4%
HP_APLASIA_HYPOPLASIA_AFFECTING_THE_EYE	HP_APLASIA_HYPOPLASIA_AFFECTING_THE_EYE		289	0.183029	0.808851	0.977099	1	1	3060	tags=25%, list=26%, signal=33%
GOBP_TERMINATION_OF_RNA_POLYMERASE_II_TRANSCRIPTION	GOBP_TERMINATION_OF_RNA_POLYMERASE_II_TRANSCRIPTION		24	0.283048	0.80875	0.746305	1	1	4362	tags=38%, list=37%, signal=59%
HP_LOW_SET_POSTERIORLY_ROTATED_EARS	HP_LOW_SET_POSTERIORLY_ROTATED_EARS		191	0.1895	0.808244	0.941489	1	1	3124	tags=31%, list=26%, signal=42%
HP_UNDERDEVELOPED_NASAL_ALAE	HP_UNDERDEVELOPED_NASAL_ALAE		64	0.229735	0.808188	0.83	1	1	1522	tags=16%, list=13%, signal=18%
GSE24634_TREG_VS_TCONV_POST_DAY3_IL4_CONVERSION_UP	GSE24634_TREG_VS_TCONV_POST_DAY3_IL4_CONVERSION_UP		174	0.195626	0.808176	0.943005	1	1	2966	tags=28%, list=25%, signal=36%
GOBP_NEGATIVE_REGULATION_OF_ATP_METABOLIC_PROCESS	GOBP_NEGATIVE_REGULATION_OF_ATP_METABOLIC_PROCESS		20	0.29705	0.808123	0.712589	1	1	264	tags=10%, list=2%, signal=10%
GOCC_TRANS_GOLGI_NETWORK_MEMBRANE	GOCC_TRANS_GOLGI_NETWORK_MEMBRANE		73	0.225477	0.808021	0.864407	1	1	2337	tags=19%, list=20%, signal=24%
GOBP_NEGATIVE_REGULATION_OF_PROTEOLYSIS_INVOLVED_IN_CELLULAR_PROTEIN_CATABOLIC_PROCESS	GOBP_NEGATIVE_REGULATION_OF_PROTEOLYSIS_INVOLVED_IN_CELLULAR_PROTEIN_CATABOLIC_PROCESS		52	0.233133	0.807562	0.805634	1	1	2938	tags=25%, list=25%, signal=33%
GOBP_COLUMNAR_CUBOIDAL_EPITHELIAL_CELL_DIFFERENTIATION	GOBP_COLUMNAR_CUBOIDAL_EPITHELIAL_CELL_DIFFERENTIATION		48	0.240413	0.807097	0.820122	1	1	1942	tags=21%, list=16%, signal=25%
GSE32986_UNSTIM_VS_GMCSF_AND_CURDLAN_HIGHDOSE_STIM_DC_DN	GSE32986_UNSTIM_VS_GMCSF_AND_CURDLAN_HIGHDOSE_STIM_DC_DN		146	0.195194	0.806966	0.944724	1	1	2953	tags=29%, list=25%, signal=38%
GOBP_DNA_INTEGRITY_CHECKPOINT	GOBP_DNA_INTEGRITY_CHECKPOINT		139	0.202759	0.806764	0.944223	1	1	3493	tags=32%, list=30%, signal=44%
GOBP_VESICLE_DOCKING	GOBP_VESICLE_DOCKING		48	0.240433	0.806705	0.809659	1	1	2028	tags=21%, list=17%, signal=25%
GSE17721_CTRL_VS_CPG_24H_BMDC_UP	GSE17721_CTRL_VS_CPG_24H_BMDC_UP		134	0.200132	0.806279	0.940426	1	1	2541	tags=24%, list=22%, signal=30%
GSE25677_R848_VS_MPL_AND_R848_STIM_BCELL_DN	GSE25677_R848_VS_MPL_AND_R848_STIM_BCELL_DN		137	0.204377	0.805537	0.916667	1	1	2312	tags=22%, list=20%, signal=27%
GSE21678_WT_VS_FOXO1_FOXO3_KO_TREG_DN	GSE21678_WT_VS_FOXO1_FOXO3_KO_TREG_DN		144	0.199035	0.805279	0.943878	1	1	1292	tags=12%, list=11%, signal=13%
GOCC_PHOTORECEPTOR_OUTER_SEGMENT	GOCC_PHOTORECEPTOR_OUTER_SEGMENT		36	0.256551	0.805082	0.778075	1	1	2953	tags=39%, list=25%, signal=52%
KAECH_NAIVE_VS_DAY8_EFF_CD8_TCELL_UP	KAECH_NAIVE_VS_DAY8_EFF_CD8_TCELL_UP		169	0.196497	0.804917	0.939252	1	1	2656	tags=26%, list=22%, signal=33%
GOBP_CELLULAR_COMPONENT_DISASSEMBLY_INVOLVED_IN_EXECUTION_PHASE_OF_APOPTOSIS	GOBP_CELLULAR_COMPONENT_DISASSEMBLY_INVOLVED_IN_EXECUTION_PHASE_OF_APOPTOSIS		25	0.271909	0.80444	0.736181	1	1	263	tags=8%, list=2%, signal=8%
HP_ABNORMAL_LEVELS_OF_ALPHA_FETOPROTEIN	HP_ABNORMAL_LEVELS_OF_ALPHA_FETOPROTEIN		19	0.302431	0.804064	0.705584	1	1	2584	tags=37%, list=22%, signal=47%
GOBP_REGULATION_OF_CLATHRIN_DEPENDENT_ENDOCYTOSIS	GOBP_REGULATION_OF_CLATHRIN_DEPENDENT_ENDOCYTOSIS		17	0.300173	0.803388	0.771429	1	1	54	tags=6%, list=0%, signal=6%
HP_ABNORMAL_SOCIAL_BEHAVIOR	HP_ABNORMAL_SOCIAL_BEHAVIOR		137	0.199005	0.802998	0.938326	1	1	3854	tags=36%, list=33%, signal=54%
GOBP_GLYCOSYL_COMPOUND_BIOSYNTHETIC_PROCESS	GOBP_GLYCOSYL_COMPOUND_BIOSYNTHETIC_PROCESS		28	0.272368	0.802836	0.751979	1	1	3221	tags=43%, list=27%, signal=59%
GOBP_REGULATION_OF_CHOLESTEROL_METABOLIC_PROCESS	GOBP_REGULATION_OF_CHOLESTEROL_METABOLIC_PROCESS		50	0.239183	0.802279	0.800595	1	1	1400	tags=14%, list=12%, signal=16%
GSE41867_LCMV_ARMSTRONG_VS_CLONE13_DAY6_EFFECTOR_CD8_TCELL_DN	GSE41867_LCMV_ARMSTRONG_VS_CLONE13_DAY6_EFFECTOR_CD8_TCELL_DN		168	0.193529	0.802184	0.936842	1	1	3907	tags=38%, list=33%, signal=56%
GSE22432_CDC_VS_COMMON_DC_PROGENITOR_DN	GSE22432_CDC_VS_COMMON_DC_PROGENITOR_DN		165	0.194647	0.802173	0.925764	1	1	2006	tags=19%, list=17%, signal=22%
GSE29618_PRE_VS_DAY7_FLU_VACCINE_BCELL_DN	GSE29618_PRE_VS_DAY7_FLU_VACCINE_BCELL_DN		133	0.2026	0.80203	0.903475	1	1	2507	tags=24%, list=21%, signal=30%
HP_HYPERURICEMIA	HP_HYPERURICEMIA		16	0.306169	0.801011	0.734597	1	1	455	tags=13%, list=4%, signal=13%
HP_ABSENT_FACIAL_HAIR	HP_ABSENT_FACIAL_HAIR		17	0.30634	0.800592	0.720482	1	1	1033	tags=18%, list=9%, signal=19%
GSE6090_UNSTIM_VS_DC_SIGN_STIM_DC_UP	GSE6090_UNSTIM_VS_DC_SIGN_STIM_DC_UP		142	0.200111	0.800293	0.923445	1	1	3955	tags=42%, list=33%, signal=63%
GSE5503_LIVER_DC_VS_PLN_DC_ACTIVATED_ALLOGENIC_TCELL_DN	GSE5503_LIVER_DC_VS_PLN_DC_ACTIVATED_ALLOGENIC_TCELL_DN		170	0.194559	0.800271	0.950739	1	1	2375	tags=22%, list=20%, signal=28%
GOBP_REGULATION_OF_POTASSIUM_ION_TRANSMEMBRANE_TRANSPORTER_ACTIVITY	GOBP_REGULATION_OF_POTASSIUM_ION_TRANSMEMBRANE_TRANSPORTER_ACTIVITY		29	0.264227	0.799672	0.792308	1	1	870	tags=17%, list=7%, signal=19%
GSE27786_CD4_TCELL_VS_NEUTROPHIL_UP	GSE27786_CD4_TCELL_VS_NEUTROPHIL_UP		172	0.19514	0.799292	0.951219	1	1	2668	tags=26%, list=23%, signal=33%
GOCC_90S_PRERIBOSOME	GOCC_90S_PRERIBOSOME		26	0.271241	0.79928	0.747368	1	1	4110	tags=38%, list=35%, signal=59%
GOMF_METALLOAMINOPEPTIDASE_ACTIVITY	GOMF_METALLOAMINOPEPTIDASE_ACTIVITY		22	0.280873	0.799035	0.769596	1	1	15	tags=5%, list=0%, signal=5%
GOBP_REGULATION_OF_ACTIN_NUCLEATION	GOBP_REGULATION_OF_ACTIN_NUCLEATION		23	0.285535	0.798873	0.734536	1	1	2016	tags=22%, list=17%, signal=26%
GSE20152_SPHK1_KO_VS_WT_HTNFA_OVERXPRESS_ANKLE_DN	GSE20152_SPHK1_KO_VS_WT_HTNFA_OVERXPRESS_ANKLE_DN		167	0.194579	0.798603	0.935829	1	1	2470	tags=20%, list=21%, signal=25%
GSE27241_CTRL_VS_DIGOXIN_TREATED_RORGT_KO_CD4_TCELL_IN_TH17_POLARIZING_CONDITIONS_UP	GSE27241_CTRL_VS_DIGOXIN_TREATED_RORGT_KO_CD4_TCELL_IN_TH17_POLARIZING_CONDITIONS_UP		159	0.194387	0.79858	0.960199	1	1	2293	tags=19%, list=19%, signal=24%
GOCC_INTERCELLULAR_BRIDGE	GOCC_INTERCELLULAR_BRIDGE		63	0.226306	0.798428	0.857605	1	1	3136	tags=35%, list=27%, signal=47%
HP_HEMIANOPIA	HP_HEMIANOPIA		32	0.255663	0.798293	0.764228	1	1	963	tags=9%, list=8%, signal=10%
GOBP_CEREBELLAR_CORTEX_MORPHOGENESIS	GOBP_CEREBELLAR_CORTEX_MORPHOGENESIS		21	0.286526	0.797721	0.753086	1	1	1226	tags=19%, list=10%, signal=21%
GOCC_EXORIBONUCLEASE_COMPLEX	GOCC_EXORIBONUCLEASE_COMPLEX		25	0.276126	0.797509	0.756164	1	1	4233	tags=44%, list=36%, signal=68%
GSE20500_CTRL_VS_RARA_ANTAGONIST_TREATED_CD4_TCELL_DN	GSE20500_CTRL_VS_RARA_ANTAGONIST_TREATED_CD4_TCELL_DN		166	0.191449	0.797243	0.950249	1	1	2620	tags=23%, list=22%, signal=29%
GOBP_NEGATIVE_REGULATION_OF_PROTEASOMAL_PROTEIN_CATABOLIC_PROCESS	GOBP_NEGATIVE_REGULATION_OF_PROTEASOMAL_PROTEIN_CATABOLIC_PROCESS		40	0.252168	0.797061	0.798883	1	1	3637	tags=35%, list=31%, signal=50%
GSE15330_HSC_VS_PRO_BCELL_UP	GSE15330_HSC_VS_PRO_BCELL_UP		176	0.188172	0.796728	0.973684	1	1	3555	tags=32%, list=30%, signal=46%
GSE22886_NAIVE_TCELL_VS_NEUTROPHIL_UP	GSE22886_NAIVE_TCELL_VS_NEUTROPHIL_UP		166	0.190223	0.795778	0.955445	1	1	2323	tags=19%, list=20%, signal=23%
HP_HIGH_ANTERIOR_HAIRLINE	HP_HIGH_ANTERIOR_HAIRLINE		34	0.252073	0.795442	0.793872	1	1	3090	tags=38%, list=26%, signal=52%
GOBP_SCF_DEPENDENT_PROTEASOMAL_UBIQUITIN_DEPENDENT_PROTEIN_CATABOLIC_PROCESS	GOBP_SCF_DEPENDENT_PROTEASOMAL_UBIQUITIN_DEPENDENT_PROTEIN_CATABOLIC_PROCESS		73	0.216149	0.795367	0.850649	1	1	3757	tags=36%, list=32%, signal=52%
GOBP_POSITIVE_REGULATION_OF_CALCIUM_ION_TRANSMEMBRANE_TRANSPORTER_ACTIVITY	GOBP_POSITIVE_REGULATION_OF_CALCIUM_ION_TRANSMEMBRANE_TRANSPORTER_ACTIVITY		26	0.271235	0.795237	0.770083	1	1	2251	tags=31%, list=19%, signal=38%
HP_MESOMELIA	HP_MESOMELIA		25	0.274259	0.795197	0.786601	1	1	1627	tags=16%, list=14%, signal=19%
GOCC_PML_BODY	GOCC_PML_BODY		83	0.218048	0.795172	0.868132	1	1	1925	tags=17%, list=16%, signal=20%
HP_JUVENILE_ASEPTIC_NECROSIS	HP_JUVENILE_ASEPTIC_NECROSIS		25	0.27579	0.795034	0.740385	1	1	1522	tags=16%, list=13%, signal=18%
GOBP_MATING	GOBP_MATING		19	0.290784	0.795028	0.726368	1	1	2468	tags=37%, list=21%, signal=46%
GOMF_EXODEOXYRIBONUCLEASE_ACTIVITY	GOMF_EXODEOXYRIBONUCLEASE_ACTIVITY		20	0.289054	0.794485	0.737245	1	1	3777	tags=45%, list=32%, signal=66%
GSE15324_NAIVE_VS_ACTIVATED_ELF4_KO_CD8_TCELL_DN	GSE15324_NAIVE_VS_ACTIVATED_ELF4_KO_CD8_TCELL_DN		167	0.19186	0.794368	0.936585	1	1	2275	tags=22%, list=19%, signal=27%
HOEK_NK_CELL_2011_2012_TIV_1D_VS_0DY_ADULT_1D_DN	HOEK_NK_CELL_2011_2012_TIV_1D_VS_0DY_ADULT_1D_DN		25	0.271458	0.794313	0.787062	1	1	2429	tags=40%, list=21%, signal=50%
GOBP_CELLULAR_CARBOHYDRATE_BIOSYNTHETIC_PROCESS	GOBP_CELLULAR_CARBOHYDRATE_BIOSYNTHETIC_PROCESS		64	0.225576	0.794191	0.851974	1	1	1493	tags=14%, list=13%, signal=16%
GOMF_N_ACYLTRANSFERASE_ACTIVITY	GOMF_N_ACYLTRANSFERASE_ACTIVITY		63	0.226693	0.793962	0.861635	1	1	1499	tags=14%, list=13%, signal=16%
[truncated: 664 more rows]

## Sheet: neg
Negatively enriched pathways in TRAF3 mutated samples compared to wild-type.
NAME	GS<br> follow link to MSigDB	GS DETAILS	SIZE	ES	NES	NOM p-val	FDR q-val	FWER p-val	RANK AT MAX	LEADING EDGE
GOBP_ADAPTIVE_IMMUNE_RESPONSE	GOBP_ADAPTIVE_IMMUNE_RESPONSE	Details ...	314	-0.658396	-2.42954	0	0	0	1720	tags=39%, list=15%, signal=45%
GOBP_HUMORAL_IMMUNE_RESPONSE	GOBP_HUMORAL_IMMUNE_RESPONSE	Details ...	128	-0.712466	-2.3939	0	0	0	1606	tags=43%, list=14%, signal=49%
KEGG_CYTOKINE_CYTOKINE_RECEPTOR_INTERACTION	KEGG_CYTOKINE_CYTOKINE_RECEPTOR_INTERACTION	Details ...	164	-0.683113	-2.37311	0	0	0	1600	tags=52%, list=14%, signal=59%
HALLMARK_TNFA_SIGNALING_VIA_NFKB	HALLMARK_TNFA_SIGNALING_VIA_NFKB	Details ...	171	-0.672863	-2.3391	0	0	0	2064	tags=54%, list=17%, signal=65%
GSE10325_BCELL_VS_MYELOID_DN	GSE10325_BCELL_VS_MYELOID_DN	Details ...	156	-0.674377	-2.31554	0	0	0	1858	tags=54%, list=16%, signal=63%
GOBP_REGULATION_OF_HUMORAL_IMMUNE_RESPONSE	GOBP_REGULATION_OF_HUMORAL_IMMUNE_RESPONSE	Details ...	48	-0.778219	-2.2968	0	0	0	958	tags=35%, list=8%, signal=38%
BMI1_DN_MEL18_DN.V1_UP	BMI1_DN_MEL18_DN.V1_UP	Details ...	116	-0.681625	-2.27758	0	0	0	1718	tags=49%, list=15%, signal=57%
GOBP_COMPLEMENT_ACTIVATION	GOBP_COMPLEMENT_ACTIVATION	Details ...	45	-0.791596	-2.27137	0	0	0	1341	tags=49%, list=11%, signal=55%
GSE34392_ST2_KO_VS_WT_DAY8_LCMV_EFFECTOR_CD8_TCELL_DN	GSE34392_ST2_KO_VS_WT_DAY8_LCMV_EFFECTOR_CD8_TCELL_DN	Details ...	175	-0.653172	-2.27121	0	0	0	1709	tags=46%, list=14%, signal=53%
GOBP_B_CELL_MEDIATED_IMMUNITY	GOBP_B_CELL_MEDIATED_IMMUNITY	Details ...	100	-0.696835	-2.27069	0	0	0	1720	tags=40%, list=15%, signal=46%
MEL18_DN.V1_UP	MEL18_DN.V1_UP	Details ...	113	-0.687941	-2.27058	0	0	0	1921	tags=54%, list=16%, signal=64%
GOCC_IMMUNOGLOBULIN_COMPLEX	GOCC_IMMUNOGLOBULIN_COMPLEX	Details ...	19	-0.921686	-2.2644	0	0	0	259	tags=47%, list=2%, signal=48%
GOBP_LYMPHOCYTE_MEDIATED_IMMUNITY	GOBP_LYMPHOCYTE_MEDIATED_IMMUNITY	Details ...	187	-0.638826	-2.25541	0	0	0	1317	tags=32%, list=11%, signal=36%
GOBP_ADAPTIVE_IMMUNE_RESPONSE_BASED_ON_SOMATIC_RECOMBINATION_OF_IMMUNE_RECEPTORS_BUILT_FROM_IMMUNOGLOBULIN_SUPERFAMILY_DOMAINS	GOBP_ADAPTIVE_IMMUNE_RESPONSE_BASED_ON_SOMATIC_RECOMBINATION_OF_IMMUNE_RECEPTORS_BUILT_FROM_IMMUNOGLOBULIN_SUPERFAMILY_DOMAINS	Details ...	207	-0.635647	-2.25494	0	0	0	1720	tags=38%, list=15%, signal=43%
GOBP_REGULATION_OF_COMPLEMENT_ACTIVATION	GOBP_REGULATION_OF_COMPLEMENT_ACTIVATION	Details ...	35	-0.796865	-2.25199	0	0	0	958	tags=40%, list=8%, signal=43%
GSE45365_NK_CELL_VS_CD11B_DC_DN	GSE45365_NK_CELL_VS_CD11B_DC_DN	Details ...	173	-0.644058	-2.24825	0	0	0	2438	tags=50%, list=21%, signal=62%
GOBP_REGULATION_OF_CELL_ACTIVATION	GOBP_REGULATION_OF_CELL_ACTIVATION	Details ...	441	-0.587871	-2.2291	0	0	0	1841	tags=39%, list=16%, signal=44%
GSE7218_UNSTIM_VS_ANTIGEN_STIM_THROUGH_IGG_BCELL_DN	GSE7218_UNSTIM_VS_ANTIGEN_STIM_THROUGH_IGG_BCELL_DN	Details ...	136	-0.655756	-2.22888	0	0	0	1715	tags=54%, list=15%, signal=62%
GOBP_REGULATION_OF_IMMUNE_EFFECTOR_PROCESS	GOBP_REGULATION_OF_IMMUNE_EFFECTOR_PROCESS	Details ...	296	-0.602951	-2.22009	0	0	0	1821	tags=38%, list=15%, signal=44%
GOBP_ALPHA_BETA_T_CELL_DIFFERENTIATION	GOBP_ALPHA_BETA_T_CELL_DIFFERENTIATION	Details ...	86	-0.702316	-2.21751	0	0	0	1565	tags=47%, list=13%, signal=53%
GOBP_POSITIVE_REGULATION_OF_CELL_ACTIVATION	GOBP_POSITIVE_REGULATION_OF_CELL_ACTIVATION		269	-0.615809	-2.2174	0	0	0	1839	tags=42%, list=16%, signal=48%
GOBP_ALPHA_BETA_T_CELL_ACTIVATION	GOBP_ALPHA_BETA_T_CELL_ACTIVATION		117	-0.670424	-2.21705	0	0	0	1729	tags=45%, list=15%, signal=53%
GSE40274_CTRL_VS_FOXP3_AND_LEF1_TRANSDUCED_ACTIVATED_CD4_TCELL_UP	GSE40274_CTRL_VS_FOXP3_AND_LEF1_TRANSDUCED_ACTIVATED_CD4_TCELL_UP		117	-0.672622	-2.20975	0	0	0	1290	tags=39%, list=11%, signal=44%
GOCC_EXTERNAL_SIDE_OF_PLASMA_MEMBRANE	GOCC_EXTERNAL_SIDE_OF_PLASMA_MEMBRANE		214	-0.622076	-2.206	0	0	0	1715	tags=42%, list=15%, signal=48%
HOWARD_PBMC_INACT_MONOV_INFLUENZA_A_INDONESIA_05_2005_H5N1_AGE_19_39YO_AS03_ADJUVANT_VS_BUFFER_1DY_UP	HOWARD_PBMC_INACT_MONOV_INFLUENZA_A_INDONESIA_05_2005_H5N1_AGE_19_39YO_AS03_ADJUVANT_VS_BUFFER_1DY_UP		263	-0.606245	-2.19329	0	0	0	1725	tags=46%, list=15%, signal=53%
GOBP_LEUKOCYTE_MIGRATION	GOBP_LEUKOCYTE_MIGRATION		332	-0.593644	-2.18362	0	8.39618e-05	0.002	1715	tags=37%, list=15%, signal=42%
GOBP_CELL_RECOGNITION	GOBP_CELL_RECOGNITION		95	-0.676931	-2.18176	0	0.000121028	0.003	1341	tags=39%, list=11%, signal=44%
FLETCHER_PBMC_BCG_10W_INFANT_PPD_STIMULATED_VS_UNSTIMULATED_10W_UP	FLETCHER_PBMC_BCG_10W_INFANT_PPD_STIMULATED_VS_UNSTIMULATED_10W_UP		65	-0.71256	-2.17866	0	0.000116706	0.003	1763	tags=57%, list=15%, signal=67%
GOBP_HUMORAL_IMMUNE_RESPONSE_MEDIATED_BY_CIRCULATING_IMMUNOGLOBULIN	GOBP_HUMORAL_IMMUNE_RESPONSE_MEDIATED_BY_CIRCULATING_IMMUNOGLOBULIN		42	-0.775439	-2.17855	0	0.000112682	0.003	1134	tags=38%, list=10%, signal=42%
GSE25123_CTRL_VS_ROSIGLITAZONE_STIM_PPARG_KO_MACROPHAGE_UP	GSE25123_CTRL_VS_ROSIGLITAZONE_STIM_PPARG_KO_MACROPHAGE_UP		143	-0.631408	-2.17452	0	0.000108926	0.003	1586	tags=38%, list=13%, signal=44%
GOBP_INFLAMMATORY_RESPONSE	GOBP_INFLAMMATORY_RESPONSE		493	-0.572341	-2.17167	0	0.000105412	0.003	1716	tags=35%, list=15%, signal=40%
GOBP_POSITIVE_REGULATION_OF_IMMUNE_RESPONSE	GOBP_POSITIVE_REGULATION_OF_IMMUNE_RESPONSE		456	-0.583029	-2.16907	0	0.000136335	0.004	1725	tags=30%, list=15%, signal=34%
FLETCHER_PBMC_BCG_10W_INFANT_BCG_STIMULATED_VS_UNSTIMULATED_10W_DN	FLETCHER_PBMC_BCG_10W_INFANT_BCG_STIMULATED_VS_UNSTIMULATED_10W_DN		218	-0.619176	-2.16874	0	0.000132204	0.004	2409	tags=57%, list=20%, signal=71%
HALLMARK_INFLAMMATORY_RESPONSE	HALLMARK_INFLAMMATORY_RESPONSE		166	-0.620433	-2.16311	0	0.000352194	0.011	1393	tags=40%, list=12%, signal=44%
GOMF_IMMUNE_RECEPTOR_ACTIVITY	GOMF_IMMUNE_RECEPTOR_ACTIVITY		83	-0.678659	-2.15321	0	0.000435527	0.014	1166	tags=48%, list=10%, signal=53%
GOBP_REGULATION_OF_LYMPHOCYTE_ACTIVATION	GOBP_REGULATION_OF_LYMPHOCYTE_ACTIVATION		349	-0.582674	-2.15283	0	0.000423429	0.014	1841	tags=36%, list=16%, signal=42%
GOBP_GRANULOCYTE_MIGRATION	GOBP_GRANULOCYTE_MIGRATION		95	-0.664914	-2.14745	0	0.000529212	0.018	1593	tags=42%, list=13%, signal=48%
NAKAYA_PBMC_FLUAD_MALE_AGE_14_27YO_1D_POSTBOOST_VS_0D_PREIMM_MF59_ADJUVANTED_1DY_GENES_IN_BTM_M40_AND_M53_DN	NAKAYA_PBMC_FLUAD_MALE_AGE_14_27YO_1D_POSTBOOST_VS_0D_PREIMM_MF59_ADJUVANTED_1DY_GENES_IN_BTM_M40_AND_M53_DN		38	-0.768967	-2.14517	0	0.000601518	0.021	1028	tags=55%, list=9%, signal=60%
GSE22886_CTRL_VS_LPS_24H_DC_DN	GSE22886_CTRL_VS_LPS_24H_DC_DN		156	-0.619573	-2.14387	0	0.000586095	0.021	2470	tags=51%, list=21%, signal=63%
GOBP_REGULATION_OF_B_CELL_ACTIVATION	GOBP_REGULATION_OF_B_CELL_ACTIVATION		110	-0.650836	-2.14296	0	0.000571442	0.021	1628	tags=32%, list=14%, signal=37%
FLETCHER_PBMC_BCG_10W_INFANT_PPD_STIMULATED_VS_UNSTIMULATED_10W_DN	FLETCHER_PBMC_BCG_10W_INFANT_PPD_STIMULATED_VS_UNSTIMULATED_10W_DN		154	-0.621672	-2.14031	0	0.000663725	0.025	2233	tags=55%, list=19%, signal=66%
GSE10325_LUPUS_CD4_TCELL_VS_LUPUS_MYELOID_DN	GSE10325_LUPUS_CD4_TCELL_VS_LUPUS_MYELOID_DN		166	-0.625488	-2.13953	0	0.000647922	0.025	2207	tags=49%, list=19%, signal=59%
GSE22140_GERMFREE_VS_SPF_MOUSE_CD4_TCELL_DN	GSE22140_GERMFREE_VS_SPF_MOUSE_CD4_TCELL_DN		166	-0.617479	-2.13886	0	0.000632854	0.025	2414	tags=48%, list=20%, signal=59%
GSE29618_MONOCYTE_VS_MDC_UP	GSE29618_MONOCYTE_VS_MDC_UP		166	-0.618608	-2.13468	0	0.000667752	0.027	2128	tags=51%, list=18%, signal=61%
GOBP_GRANULOCYTE_CHEMOTAXIS	GOBP_GRANULOCYTE_CHEMOTAXIS		80	-0.672624	-2.13402	0	0.000652913	0.027	1593	tags=43%, list=13%, signal=49%
BMI1_DN.V1_UP	BMI1_DN.V1_UP		119	-0.637994	-2.13054	0	0.000780881	0.033	1921	tags=47%, list=16%, signal=56%
GSE29618_MONOCYTE_VS_MDC_DAY7_FLU_VACCINE_UP	GSE29618_MONOCYTE_VS_MDC_DAY7_FLU_VACCINE_UP		165	-0.618825	-2.13016	0	0.000787556	0.034	2453	tags=53%, list=21%, signal=66%
GOMF_ANTIGEN_BINDING	GOMF_ANTIGEN_BINDING		34	-0.775274	-2.12961	0	0.000771148	0.034	1720	tags=62%, list=15%, signal=72%
GOBP_CD4_POSITIVE_ALPHA_BETA_T_CELL_ACTIVATION	GOBP_CD4_POSITIVE_ALPHA_BETA_T_CELL_ACTIVATION		81	-0.680416	-2.12916	0	0.000777666	0.035	1729	tags=48%, list=15%, signal=56%
GOBP_CELL_CHEMOTAXIS	GOBP_CELL_CHEMOTAXIS		220	-0.593672	-2.12689	0	0.000805712	0.037	1616	tags=37%, list=14%, signal=42%
GSE3565_CTRL_VS_LPS_INJECTED_DUSP1_KO_SPLENOCYTES_UP	GSE3565_CTRL_VS_LPS_INJECTED_DUSP1_KO_SPLENOCYTES_UP		150	-0.611721	-2.12602	0	0.000789913	0.037	1825	tags=43%, list=15%, signal=51%
GOBP_CD4_POSITIVE_ALPHA_BETA_T_CELL_DIFFERENTIATION	GOBP_CD4_POSITIVE_ALPHA_BETA_T_CELL_DIFFERENTIATION		67	-0.694582	-2.12525	0	0.000774723	0.037	1565	tags=46%, list=13%, signal=53%
GOBP_POSITIVE_REGULATION_OF_B_CELL_ACTIVATION	GOBP_POSITIVE_REGULATION_OF_B_CELL_ACTIVATION		73	-0.677629	-2.11826	0	0.000883312	0.043	1593	tags=33%, list=13%, signal=38%
GAUCHER_PBMC_YF_VAX_STAMARIL_UNKNOWN_AGE_7DY_UP	GAUCHER_PBMC_YF_VAX_STAMARIL_UNKNOWN_AGE_7DY_UP		233	-0.594735	-2.11484	0	0.000907262	0.045	2175	tags=46%, list=18%, signal=56%
GSE22140_HEALTHY_VS_ARTHRITIC_GERMFREE_MOUSE_CD4_TCELL_DN	GSE22140_HEALTHY_VS_ARTHRITIC_GERMFREE_MOUSE_CD4_TCELL_DN		165	-0.616868	-2.11415	0	0.000890766	0.045	2620	tags=53%, list=22%, signal=68%
GSE29618_BCELL_VS_MONOCYTE_DAY7_FLU_VACCINE_DN	GSE29618_BCELL_VS_MONOCYTE_DAY7_FLU_VACCINE_DN		163	-0.606286	-2.10828	0	0.00103039	0.051	1868	tags=47%, list=16%, signal=55%
GOMF_CYTOKINE_ACTIVITY	GOMF_CYTOKINE_ACTIVITY		98	-0.640165	-2.10573	0	0.00106944	0.054	1307	tags=39%, list=11%, signal=43%
GOBP_REGULATION_OF_LEUKOCYTE_MEDIATED_IMMUNITY	GOBP_REGULATION_OF_LEUKOCYTE_MEDIATED_IMMUNITY		152	-0.611423	-2.10567	0	0.001051	0.054	1821	tags=40%, list=15%, signal=47%
GOBP_IMMUNE_RESPONSE_REGULATING_SIGNALING_PATHWAY	GOBP_IMMUNE_RESPONSE_REGULATING_SIGNALING_PATHWAY		306	-0.570436	-2.10446	0	0.00110712	0.058	1725	tags=27%, list=15%, signal=31%
GOBP_NEGATIVE_REGULATION_OF_IMMUNE_RESPONSE	GOBP_NEGATIVE_REGULATION_OF_IMMUNE_RESPONSE		101	-0.648013	-2.10394	0	0.00112515	0.06	1001	tags=33%, list=8%, signal=35%
GSE36891_POLYIC_TLR3_VS_PAM_TLR2_STIM_PERITONEAL_MACROPHAGE_UP	GSE36891_POLYIC_TLR3_VS_PAM_TLR2_STIM_PERITONEAL_MACROPHAGE_UP		112	-0.632524	-2.1025	0	0.00114237	0.061	1678	tags=46%, list=14%, signal=53%
GSE10325_LUPUS_BCELL_VS_LUPUS_MYELOID_DN	GSE10325_LUPUS_BCELL_VS_LUPUS_MYELOID_DN		161	-0.607521	-2.10231	0	0.00112395	0.061	2207	tags=50%, list=19%, signal=61%
GOBP_LEUKOCYTE_CHEMOTAXIS	GOBP_LEUKOCYTE_CHEMOTAXIS		160	-0.608067	-2.10153	0	0.0011233	0.062	1616	tags=36%, list=14%, signal=41%
GOCC_T_CELL_RECEPTOR_COMPLEX	GOCC_T_CELL_RECEPTOR_COMPLEX		20	-0.834279	-2.10066	0	0.0011398	0.064	1134	tags=60%, list=10%, signal=66%
GSE41087_WT_VS_FOXP3_MUT_ANTI_CD3_CD28_STIM_CD4_TCELL_UP	GSE41087_WT_VS_FOXP3_MUT_ANTI_CD3_CD28_STIM_CD4_TCELL_UP		156	-0.605769	-2.09994	0	0.00115563	0.066	2441	tags=48%, list=21%, signal=60%
GSE9988_LOW_LPS_VS_VEHICLE_TREATED_MONOCYTE_UP	GSE9988_LOW_LPS_VS_VEHICLE_TREATED_MONOCYTE_UP		142	-0.609774	-2.0997	0	0.0011546	0.067	1476	tags=36%, list=12%, signal=41%
GOBP_REGULATION_OF_T_CELL_DIFFERENTIATION	GOBP_REGULATION_OF_T_CELL_DIFFERENTIATION		120	-0.632846	-2.0991	0	0.00115391	0.068	1533	tags=37%, list=13%, signal=42%
GOBP_MONOCYTE_CHEMOTAXIS	GOBP_MONOCYTE_CHEMOTAXIS		42	-0.742407	-2.09856	0	0.00113695	0.068	991	tags=43%, list=8%, signal=47%
GSE13485_DAY3_VS_DAY7_YF17D_VACCINE_PBMC_DN	GSE13485_DAY3_VS_DAY7_YF17D_VACCINE_PBMC_DN		132	-0.622237	-2.09852	0	0.00112047	0.068	2217	tags=48%, list=19%, signal=59%
GOBP_ACTIVATION_OF_IMMUNE_RESPONSE	GOBP_ACTIVATION_OF_IMMUNE_RESPONSE		332	-0.563901	-2.09528	0	0.00113555	0.07	1725	tags=27%, list=15%, signal=31%
GOMF_CYTOKINE_RECEPTOR_ACTIVITY	GOMF_CYTOKINE_RECEPTOR_ACTIVITY		70	-0.679402	-2.09256	0	0.00124229	0.076	1485	tags=53%, list=13%, signal=60%
GOBP_MYELOID_LEUKOCYTE_MIGRATION	GOBP_MYELOID_LEUKOCYTE_MIGRATION		149	-0.611453	-2.09218	0	0.00125531	0.078	1593	tags=38%, list=13%, signal=44%
GOMF_SODIUM_ION_TRANSMEMBRANE_TRANSPORTER_ACTIVITY	GOMF_SODIUM_ION_TRANSMEMBRANE_TRANSPORTER_ACTIVITY		62	-0.692531	-2.09216	0	0.00123811	0.078	730	tags=27%, list=6%, signal=29%
GSE11057_PBMC_VS_MEM_CD4_TCELL_UP	GSE11057_PBMC_VS_MEM_CD4_TCELL_UP		162	-0.606011	-2.09189	0	0.00123609	0.079	1634	tags=40%, list=14%, signal=46%
GSE29618_MONOCYTE_VS_PDC_DAY7_FLU_VACCINE_UP	GSE29618_MONOCYTE_VS_PDC_DAY7_FLU_VACCINE_UP		167	-0.606835	-2.09101	0	0.00124877	0.081	2122	tags=49%, list=18%, signal=58%
GSE40274_CTRL_VS_FOXP3_AND_GATA1_TRANSDUCED_ACTIVATED_CD4_TCELL_UP	GSE40274_CTRL_VS_FOXP3_AND_GATA1_TRANSDUCED_ACTIVATED_CD4_TCELL_UP		96	-0.642402	-2.09072	0	0.00124669	0.082	1433	tags=36%, list=12%, signal=41%
GOBP_T_CELL_DIFFERENTIATION	GOBP_T_CELL_DIFFERENTIATION		200	-0.586494	-2.08789	0	0.00134376	0.089	1565	tags=34%, list=13%, signal=39%
GOBP_FC_RECEPTOR_MEDIATED_STIMULATORY_SIGNALING_PATHWAY	GOBP_FC_RECEPTOR_MEDIATED_STIMULATORY_SIGNALING_PATHWAY		80	-0.65911	-2.08754	0	0.00132653	0.089	1620	tags=26%, list=14%, signal=30%
GOBP_PRODUCTION_OF_MOLECULAR_MEDIATOR_OF_IMMUNE_RESPONSE	GOBP_PRODUCTION_OF_MOLECULAR_MEDIATOR_OF_IMMUNE_RESPONSE		162	-0.605599	-2.08702	0	0.00132345	0.09	1720	tags=35%, list=15%, signal=40%
GOBP_IMMUNOGLOBULIN_PRODUCTION	GOBP_IMMUNOGLOBULIN_PRODUCTION		96	-0.631568	-2.08506	0	0.00138835	0.096	713	tags=20%, list=6%, signal=21%
GOBP_REGULATION_OF_LYMPHOCYTE_DIFFERENTIATION	GOBP_REGULATION_OF_LYMPHOCYTE_DIFFERENTIATION		144	-0.606679	-2.08299	0	0.00141157	0.099	1711	tags=36%, list=14%, signal=42%
FLETCHER_PBMC_BCG_10W_INFANT_BCG_STIMULATED_VS_UNSTIMULATED_10W_UP	FLETCHER_PBMC_BCG_10W_INFANT_BCG_STIMULATED_VS_UNSTIMULATED_10W_UP		91	-0.662438	-2.08229	0	0.00140751	0.1	1763	tags=46%, list=15%, signal=54%
SCHERER_PBMC_APSV_WETVAX_AGE_18_32YO_5_TO_7DY_UP	SCHERER_PBMC_APSV_WETVAX_AGE_18_32YO_5_TO_7DY_UP		219	-0.583217	-2.08155	0	0.00142989	0.102	2082	tags=45%, list=18%, signal=54%
GSE22886_NAIVE_BCELL_VS_NEUTROPHIL_DN	GSE22886_NAIVE_BCELL_VS_NEUTROPHIL_DN		151	-0.614504	-2.08135	0	0.0014517	0.105	2128	tags=49%, list=18%, signal=59%
GOBP_REGULATION_OF_ADAPTIVE_IMMUNE_RESPONSE	GOBP_REGULATION_OF_ADAPTIVE_IMMUNE_RESPONSE		130	-0.61439	-2.07759	0	0.00149875	0.108	1711	tags=37%, list=14%, signal=43%
GOBP_REGULATION_OF_T_CELL_ACTIVATION	GOBP_REGULATION_OF_T_CELL_ACTIVATION		256	-0.57173	-2.07723	0	0.00149393	0.108	1729	tags=37%, list=15%, signal=42%
GSE22886_NAIVE_BCELL_VS_MONOCYTE_DN	GSE22886_NAIVE_BCELL_VS_MONOCYTE_DN		169	-0.608255	-2.07721	0	0.00147676	0.108	2317	tags=48%, list=20%, signal=59%
GOBP_RESPONSE_TO_CHEMOKINE	GOBP_RESPONSE_TO_CHEMOKINE		58	-0.692743	-2.07675	0	0.00148479	0.11	862	tags=36%, list=7%, signal=39%
GOMF_EXOGENOUS_PROTEIN_BINDING	GOMF_EXOGENOUS_PROTEIN_BINDING		55	-0.700289	-2.07548	0	0.00151707	0.114	1818	tags=56%, list=15%, signal=66%
LI_PBMC_MENACTRA_AGE_18_45YO_CORRELATED_WITH_ANTI_POLYSACCHARIDE_ANTIBODY_3DY_POSITIVE	LI_PBMC_MENACTRA_AGE_18_45YO_CORRELATED_WITH_ANTI_POLYSACCHARIDE_ANTIBODY_3DY_POSITIVE		45	-0.709825	-2.07388	0.0015083	0.00160894	0.121	1299	tags=56%, list=11%, signal=62%
GSE3982_NEUTROPHIL_VS_BCELL_UP	GSE3982_NEUTROPHIL_VS_BCELL_UP		135	-0.614837	-2.07286	0	0.00162725	0.122	1733	tags=39%, list=15%, signal=45%
ZAK_PBMC_MRKAD5_HIV_1_GAG_POL_NEF_AGE_20_50YO_AD5_NAB_TITERS_GT_200_VS_LTE_200_1DY_DN	ZAK_PBMC_MRKAD5_HIV_1_GAG_POL_NEF_AGE_20_50YO_AD5_NAB_TITERS_GT_200_VS_LTE_200_1DY_DN		71	-0.664548	-2.07102	0	0.00169247	0.127	1373	tags=45%, list=12%, signal=51%
GOBP_REGULATION_OF_ALPHA_BETA_T_CELL_ACTIVATION	GOBP_REGULATION_OF_ALPHA_BETA_T_CELL_ACTIVATION		81	-0.658067	-2.06986	0	0.00169783	0.129	1729	tags=44%, list=15%, signal=52%
GSE22140_GERMFREE_VS_SPF_MOUSE_CD4_TCELL_UP	GSE22140_GERMFREE_VS_SPF_MOUSE_CD4_TCELL_UP		162	-0.600039	-2.06864	0	0.00171457	0.132	2125	tags=44%, list=18%, signal=53%
GOBP_DEFENSE_RESPONSE_TO_BACTERIUM	GOBP_DEFENSE_RESPONSE_TO_BACTERIUM		121	-0.615182	-2.06856	0	0.00169652	0.132	1609	tags=39%, list=14%, signal=45%
GSE360_CTRL_VS_M_TUBERCULOSIS_DC_DN	GSE360_CTRL_VS_M_TUBERCULOSIS_DC_DN		146	-0.607841	-2.06833	0	0.00169013	0.133	1717	tags=40%, list=15%, signal=47%
GOBP_LYMPHOCYTE_CHEMOTAXIS	GOBP_LYMPHOCYTE_CHEMOTAXIS		37	-0.730238	-2.0675	0	0.00170625	0.135	816	tags=38%, list=7%, signal=41%
HALLMARK_INTERFERON_GAMMA_RESPONSE	HALLMARK_INTERFERON_GAMMA_RESPONSE		162	-0.597053	-2.06679	0	0.00172199	0.136	2490	tags=52%, list=21%, signal=65%
GSE22886_NAIVE_CD4_TCELL_VS_NEUTROPHIL_DN	GSE22886_NAIVE_CD4_TCELL_VS_NEUTROPHIL_DN		128	-0.613846	-2.06661	0	0.0017046	0.136	1600	tags=39%, list=14%, signal=45%
GSE39110_UNTREATED_VS_IL2_TREATED_CD8_TCELL_DAY6_POST_IMMUNIZATION_UP	GSE39110_UNTREATED_VS_IL2_TREATED_CD8_TCELL_DAY6_POST_IMMUNIZATION_UP		156	-0.602315	-2.06588	0	0.00172035	0.139	1284	tags=35%, list=11%, signal=39%
GOBP_T_CELL_ACTIVATION	GOBP_T_CELL_ACTIVATION		364	-0.554333	-2.0645	0	0.00172492	0.141	1729	tags=34%, list=15%, signal=38%
GSE26495_NAIVE_VS_PD1LOW_CD8_TCELL_DN	GSE26495_NAIVE_VS_PD1LOW_CD8_TCELL_DN		161	-0.603986	-2.0644	0	0.001708	0.141	2142	tags=48%, list=18%, signal=58%
GSE41176_UNSTIM_VS_ANTI_IGM_STIM_BCELL_1H_UP	GSE41176_UNSTIM_VS_ANTI_IGM_STIM_BCELL_1H_UP		154	-0.602966	-2.06122	0	0.00179739	0.15	1856	tags=44%, list=16%, signal=51%
GSE9988_LPS_VS_VEHICLE_TREATED_MONOCYTE_UP	GSE9988_LPS_VS_VEHICLE_TREATED_MONOCYTE_UP		140	-0.604016	-2.05845	0	0.00190554	0.161	1476	tags=35%, list=12%, signal=40%
GOBP_REGULATION_OF_ALPHA_BETA_T_CELL_DIFFERENTIATION	GOBP_REGULATION_OF_ALPHA_BETA_T_CELL_DIFFERENTIATION		55	-0.687072	-2.05754	0	0.00195005	0.165	1515	tags=44%, list=13%, signal=50%
GSE2706_UNSTIM_VS_2H_LPS_AND_R848_DC_DN	GSE2706_UNSTIM_VS_2H_LPS_AND_R848_DC_DN		140	-0.600862	-2.05413	0	0.0020654	0.177	2578	tags=51%, list=22%, signal=64%
GSE21670_STAT3_KO_VS_WT_CD4_TCELL_TGFB_IL6_TREATED_DN	GSE21670_STAT3_KO_VS_WT_CD4_TCELL_TGFB_IL6_TREATED_DN		172	-0.587746	-2.05353	0	0.00206645	0.179	2409	tags=47%, list=20%, signal=58%
GSE360_LOW_DOSE_B_MALAYI_VS_M_TUBERCULOSIS_DC_DN	GSE360_LOW_DOSE_B_MALAYI_VS_M_TUBERCULOSIS_DC_DN		154	-0.601407	-2.05312	0	0.0020574	0.18	1552	tags=37%, list=13%, signal=42%
PATEL_SKIN_OF_BODY_ZOSTAVAX_AGE_70_93YO_VZV_CHALLENGE_6HR_TOP_30_DEG_UP	PATEL_SKIN_OF_BODY_ZOSTAVAX_AGE_70_93YO_VZV_CHALLENGE_6HR_TOP_30_DEG_UP		20	-0.844981	-2.05236	0	0.00211841	0.184	708	tags=50%, list=6%, signal=53%
GSE41176_UNSTIM_VS_ANTI_IGM_STIM_BCELL_3H_UP	GSE41176_UNSTIM_VS_ANTI_IGM_STIM_BCELL_3H_UP		149	-0.593057	-2.05189	0	0.00210915	0.185	2117	tags=44%, list=18%, signal=52%
GSE41176_UNSTIM_VS_ANTI_IGM_STIM_TAK1_KO_BCELL_24H_DN	GSE41176_UNSTIM_VS_ANTI_IGM_STIM_TAK1_KO_BCELL_24H_DN		148	-0.601139	-2.05143	0	0.00211961	0.188	1804	tags=42%, list=15%, signal=49%
KEGG_HEMATOPOIETIC_CELL_LINEAGE	KEGG_HEMATOPOIETIC_CELL_LINEAGE		62	-0.673273	-2.05007	0	0.00215925	0.193	1687	tags=42%, list=14%, signal=49%
GSE22886_NAIVE_CD8_TCELL_VS_MONOCYTE_DN	GSE22886_NAIVE_CD8_TCELL_VS_MONOCYTE_DN		172	-0.587278	-2.04946	0	0.00218846	0.197	2234	tags=47%, list=19%, signal=57%
GARCIA_PINERES_PBMC_HPV_16_L1_VLP_AGE_18_25YO_STIMULATED_VS_UNSTIMULATED_0DY_VACCINATION_INDEPENDENT_UP	GARCIA_PINERES_PBMC_HPV_16_L1_VLP_AGE_18_25YO_STIMULATED_VS_UNSTIMULATED_0DY_VACCINATION_INDEPENDENT_UP		185	-0.583632	-2.04816	0	0.00221732	0.202	1748	tags=42%, list=15%, signal=49%
GSE34156_NOD2_LIGAND_VS_TLR1_TLR2_LIGAND_6H_TREATED_MONOCYTE_DN	GSE34156_NOD2_LIGAND_VS_TLR1_TLR2_LIGAND_6H_TREATED_MONOCYTE_DN		142	-0.603863	-2.04701	0	0.00222646	0.205	1788	tags=42%, list=15%, signal=48%
GOBP_NEUTROPHIL_CHEMOTAXIS	GOBP_NEUTROPHIL_CHEMOTAXIS		67	-0.665924	-2.0462	0	0.0022727	0.211	1593	tags=42%, list=13%, signal=48%
GOBP_REGULATION_OF_CD4_POSITIVE_ALPHA_BETA_T_CELL_ACTIVATION	GOBP_REGULATION_OF_CD4_POSITIVE_ALPHA_BETA_T_CELL_ACTIVATION		55	-0.686376	-2.04399	0	0.00235604	0.222	1729	tags=49%, list=15%, signal=57%
GSE7509_UNSTIM_VS_IFNA_STIM_IMMATURE_DC_DN	GSE7509_UNSTIM_VS_IFNA_STIM_IMMATURE_DC_DN		144	-0.594465	-2.04328	0	0.00235469	0.223	2254	tags=48%, list=19%, signal=58%
GOBP_NEUTROPHIL_MIGRATION	GOBP_NEUTROPHIL_MIGRATION		81	-0.654909	-2.04297	0	0.0023349	0.223	1593	tags=41%, list=13%, signal=47%
GOBP_POSITIVE_REGULATION_OF_LEUKOCYTE_MEDIATED_IMMUNITY	GOBP_POSITIVE_REGULATION_OF_LEUKOCYTE_MEDIATED_IMMUNITY		92	-0.635777	-2.0417	0	0.002388	0.23	1821	tags=42%, list=15%, signal=50%
GSE34156_TLR1_TLR2_LIGAND_VS_NOD2_AND_TLR1_TLR2_LIGAND_24H_TREATED_MONOCYTE_UP	GSE34156_TLR1_TLR2_LIGAND_VS_NOD2_AND_TLR1_TLR2_LIGAND_24H_TREATED_MONOCYTE_UP		151	-0.589859	-2.0398	0	0.00244029	0.235	1788	tags=40%, list=15%, signal=47%
GSE29618_MONOCYTE_VS_PDC_UP	GSE29618_MONOCYTE_VS_PDC_UP		161	-0.59038	-2.03934	0	0.00243815	0.237	2485	tags=52%, list=21%, signal=65%
GSE43955_TH0_VS_TGFB_IL6_TH17_ACT_CD4_TCELL_1H_UP	GSE43955_TH0_VS_TGFB_IL6_TH17_ACT_CD4_TCELL_1H_UP		153	-0.591494	-2.03747	0	0.00250675	0.244	1321	tags=30%, list=11%, signal=33%
GOBP_SODIUM_ION_TRANSPORT	GOBP_SODIUM_ION_TRANSPORT		121	-0.611474	-2.03686	0	0.00251286	0.247	1508	tags=31%, list=13%, signal=35%
GOBP_NEGATIVE_REGULATION_OF_LEUKOCYTE_MEDIATED_IMMUNITY	GOBP_NEGATIVE_REGULATION_OF_LEUKOCYTE_MEDIATED_IMMUNITY		33	-0.760848	-2.03663	0	0.00250151	0.248	829	tags=45%, list=7%, signal=49%
GSE13485_CTRL_VS_DAY7_YF17D_VACCINE_PBMC_DN	GSE13485_CTRL_VS_DAY7_YF17D_VACCINE_PBMC_DN		156	-0.589413	-2.03651	0	0.00248166	0.248	2527	tags=52%, list=21%, signal=65%
GSE21360_PRIMARY_VS_TERTIARY_MEMORY_CD8_TCELL_DN	GSE21360_PRIMARY_VS_TERTIARY_MEMORY_CD8_TCELL_DN		162	-0.585699	-2.03627	0	0.00248781	0.251	2230	tags=51%, list=19%, signal=62%
HALLMARK_ALLOGRAFT_REJECTION	HALLMARK_ALLOGRAFT_REJECTION		161	-0.590083	-2.03624	0	0.00247687	0.252	1715	tags=39%, list=15%, signal=44%
GOBP_INTERLEUKIN_10_PRODUCTION	GOBP_INTERLEUKIN_10_PRODUCTION		40	-0.726039	-2.03618	0	0.00245767	0.252	1810	tags=55%, list=15%, signal=65%
GOBP_NEGATIVE_REGULATION_OF_IMMUNE_SYSTEM_PROCESS	GOBP_NEGATIVE_REGULATION_OF_IMMUNE_SYSTEM_PROCESS		286	-0.559732	-2.03507	0	0.0025142	0.261	1865	tags=36%, list=16%, signal=41%
GAUCHER_PBMC_YF_VAX_STAMARIL_UNKNOWN_AGE_3DY_UP	GAUCHER_PBMC_YF_VAX_STAMARIL_UNKNOWN_AGE_3DY_UP		175	-0.582116	-2.03433	0	0.00254499	0.266	2475	tags=51%, list=21%, signal=64%
GSE9601_NFKB_INHIBITOR_VS_PI3K_INHIBITOR_TREATED_HCMV_INF_MONOCYTE_DN	GSE9601_NFKB_INHIBITOR_VS_PI3K_INHIBITOR_TREATED_HCMV_INF_MONOCYTE_DN		152	-0.596056	-2.03305	0	0.00261657	0.273	2441	tags=53%, list=21%, signal=65%
GSE7218_IGM_VS_IGG_SIGNAL_THGOUGH_ANTIGEN_BCELL_DN	GSE7218_IGM_VS_IGG_SIGNAL_THGOUGH_ANTIGEN_BCELL_DN		135	-0.600074	-2.03175	0	0.0026707	0.277	1687	tags=47%, list=14%, signal=54%
GOBP_T_CELL_ACTIVATION_INVOLVED_IN_IMMUNE_RESPONSE	GOBP_T_CELL_ACTIVATION_INVOLVED_IN_IMMUNE_RESPONSE		78	-0.650178	-2.03119	0	0.00269149	0.282	1565	tags=46%, list=13%, signal=53%
FULLER_PBMC_F_TULARENSIS_VACCINE_LVS_AGE_22_54YO_192HR_DN	FULLER_PBMC_F_TULARENSIS_VACCINE_LVS_AGE_22_54YO_192HR_DN		25	-0.773422	-2.0303	0.00165837	0.00272814	0.288	1779	tags=64%, list=15%, signal=75%
GOBP_MONONUCLEAR_CELL_DIFFERENTIATION	GOBP_MONONUCLEAR_CELL_DIFFERENTIATION		317	-0.554014	-2.02934	0	0.00278828	0.295	1647	tags=31%, list=14%, signal=35%
GOBP_SODIUM_ION_TRANSMEMBRANE_TRANSPORT	GOBP_SODIUM_ION_TRANSMEMBRANE_TRANSPORT		90	-0.618409	-2.02673	0	0.00298294	0.312	1508	tags=32%, list=13%, signal=37%
ERWIN_COHEN_BLOOD_TC_83_AGE_23_48YO_VACCINATED_VS_CONTROL_2DY_UP	ERWIN_COHEN_BLOOD_TC_83_AGE_23_48YO_VACCINATED_VS_CONTROL_2DY_UP		93	-0.630233	-2.02595	0	0.0030165	0.316	2475	tags=56%, list=21%, signal=70%
GOBP_REGULATION_OF_LYMPHOCYTE_MEDIATED_IMMUNITY	GOBP_REGULATION_OF_LYMPHOCYTE_MEDIATED_IMMUNITY		109	-0.612544	-2.02493	0	0.00307352	0.323	1821	tags=39%, list=15%, signal=45%
GOBP_INTERLEUKIN_4_PRODUCTION	GOBP_INTERLEUKIN_4_PRODUCTION		22	-0.798423	-2.02442	0	0.00307479	0.324	1628	tags=68%, list=14%, signal=79%
GOBP_ACTIVATION_OF_PHOSPHOLIPASE_C_ACTIVITY	GOBP_ACTIVATION_OF_PHOSPHOLIPASE_C_ACTIVITY		20	-0.814558	-2.02412	0	0.00306845	0.325	1428	tags=55%, list=12%, signal=62%
NAKAYA_PBMC_FLUAD_IMUVAC_MALE_AGE_14_27YO_CORRELATED_WITH_HAI_RESPONSE_MF59_ADJUVANTED_AND_NON_1DY_GENES_IN_BTM_M75_POSITIVE	NAKAYA_PBMC_FLUAD_IMUVAC_MALE_AGE_14_27YO_CORRELATED_WITH_HAI_RESPONSE_MF59_ADJUVANTED_AND_NON_1DY_GENES_IN_BTM_M75_POSITIVE		17	-0.826207	-2.02181	0	0.00319278	0.336	1668	tags=82%, list=14%, signal=96%
GSE3039_NKT_CELL_VS_ALPHAALPHA_CD8_TCELL_DN	GSE3039_NKT_CELL_VS_ALPHAALPHA_CD8_TCELL_DN		160	-0.582403	-2.02118	0	0.00319322	0.336	1716	tags=35%, list=15%, signal=40%
HOEK_B_CELL_2011_2012_TIV_ADULT_3DY_UP	HOEK_B_CELL_2011_2012_TIV_ADULT_3DY_UP		24	-0.784493	-2.02069	0	0.00319378	0.339	1839	tags=63%, list=16%, signal=74%
HALLMARK_COMPLEMENT	HALLMARK_COMPLEMENT		157	-0.588936	-2.01945	0	0.00329204	0.352	2019	tags=43%, list=17%, signal=51%
GOBP_POSITIVE_T_CELL_SELECTION	GOBP_POSITIVE_T_CELL_SELECTION		30	-0.767019	-2.01843	0	0.00329929	0.354	1531	tags=50%, list=13%, signal=57%
GSE13522_WT_VS_IFNG_KO_SKIN_UP	GSE13522_WT_VS_IFNG_KO_SKIN_UP		56	-0.670338	-2.01735	0	0.00333616	0.36	1259	tags=30%, list=11%, signal=34%
GOBP_REGULATION_OF_LEUKOCYTE_DIFFERENTIATION	GOBP_REGULATION_OF_LEUKOCYTE_DIFFERENTIATION		213	-0.563206	-2.01641	0	0.0033356	0.361	1711	tags=33%, list=14%, signal=38%
GOMF_CHEMOKINE_ACTIVITY	GOMF_CHEMOKINE_ACTIVITY		20	-0.81296	-2.01586	0	0.00334266	0.362	806	tags=55%, list=7%, signal=59%
GOMF_GROWTH_FACTOR_RECEPTOR_BINDING	GOMF_GROWTH_FACTOR_RECEPTOR_BINDING		101	-0.611896	-2.01541	0	0.00333493	0.363	1976	tags=42%, list=17%, signal=50%
GSE29618_BCELL_VS_MONOCYTE_DN	GSE29618_BCELL_VS_MONOCYTE_DN		173	-0.578373	-2.01511	0	0.00335613	0.367	2485	tags=53%, list=21%, signal=66%
HOEK_B_CELL_2011_2012_TIV_ADULT_7DY_UP	HOEK_B_CELL_2011_2012_TIV_ADULT_7DY_UP		33	-0.735557	-2.01467	0	0.00335553	0.369	1473	tags=45%, list=12%, signal=52%
GOBP_B_CELL_ACTIVATION	GOBP_B_CELL_ACTIVATION		212	-0.571143	-2.01348	0	0.00334775	0.371	1711	tags=26%, list=14%, signal=30%
LEF1_UP.V1_UP	LEF1_UP.V1_UP		120	-0.600165	-2.01128	0	0.00343918	0.382	1506	tags=34%, list=13%, signal=39%
GOBP_POSITIVE_REGULATION_OF_CD4_POSITIVE_ALPHA_BETA_T_CELL_ACTIVATION	GOBP_POSITIVE_REGULATION_OF_CD4_POSITIVE_ALPHA_BETA_T_CELL_ACTIVATION		34	-0.737373	-2.01038	0	0.00348031	0.387	1515	tags=59%, list=13%, signal=67%
KAZMIN_PBMC_P_FALCIPARUM_RTSS_AS01_AGE_UNKNOWN_CORRELATED_WITH_PROTECTION_56DY_NEGATIVE	KAZMIN_PBMC_P_FALCIPARUM_RTSS_AS01_AGE_UNKNOWN_CORRELATED_WITH_PROTECTION_56DY_NEGATIVE		27	-0.748677	-2.01019	0	0.00347196	0.388	975	tags=63%, list=8%, signal=68%
GOBP_RESPONSE_TO_INTERFERON_GAMMA	GOBP_RESPONSE_TO_INTERFERON_GAMMA		126	-0.602903	-2.00978	0	0.00345679	0.389	2022	tags=43%, list=17%, signal=51%
GOBP_NEGATIVE_REGULATION_OF_LYMPHOCYTE_MEDIATED_IMMUNITY	GOBP_NEGATIVE_REGULATION_OF_LYMPHOCYTE_MEDIATED_IMMUNITY		26	-0.77168	-2.00914	0	0.0034487	0.391	713	tags=42%, list=6%, signal=45%
GOBP_POSITIVE_REGULATION_OF_ALPHA_BETA_T_CELL_ACTIVATION	GOBP_POSITIVE_REGULATION_OF_ALPHA_BETA_T_CELL_ACTIVATION		56	-0.675957	-2.00836	0	0.00346129	0.392	1647	tags=48%, list=14%, signal=56%
GOBP_T_CELL_SELECTION	GOBP_T_CELL_SELECTION		40	-0.707868	-2.00766	0	0.00348043	0.395	1531	tags=43%, list=13%, signal=49%
GOCC_BLOOD_MICROPARTICLE	GOCC_BLOOD_MICROPARTICLE		54	-0.676172	-2.00733	0	0.00346555	0.395	1358	tags=37%, list=11%, signal=42%
KAECH_NAIVE_VS_DAY15_EFF_CD8_TCELL_DN	KAECH_NAIVE_VS_DAY15_EFF_CD8_TCELL_DN		164	-0.581697	-2.00709	0	0.00345769	0.395	1631	tags=36%, list=14%, signal=41%
GOBP_POSITIVE_REGULATION_OF_CELL_KILLING	GOBP_POSITIVE_REGULATION_OF_CELL_KILLING		42	-0.690991	-2.00615	0	0.00347646	0.399	1821	tags=52%, list=15%, signal=62%
GSE24142_EARLY_THYMIC_PROGENITOR_VS_DN3_THYMOCYTE_UP	GSE24142_EARLY_THYMIC_PROGENITOR_VS_DN3_THYMOCYTE_UP		167	-0.576145	-2.00314	0	0.00370081	0.421	1779	tags=37%, list=15%, signal=43%
GOBP_LEUKOCYTE_DIFFERENTIATION	GOBP_LEUKOCYTE_DIFFERENTIATION		402	-0.536329	-2.00298	0	0.00369157	0.421	1711	tags=31%, list=14%, signal=35%
ERWIN_COHEN_BLOOD_VACCINE_TC_83_AGE_23_48YO_VACCINATED_VS_CONTROL_7DY_UP	ERWIN_COHEN_BLOOD_VACCINE_TC_83_AGE_23_48YO_VACCINATED_VS_CONTROL_7DY_UP		57	-0.663858	-2.00274	0	0.00370226	0.424	2443	tags=61%, list=21%, signal=77%
GOBP_POSITIVE_REGULATION_OF_RESPONSE_TO_EXTERNAL_STIMULUS	GOBP_POSITIVE_REGULATION_OF_RESPONSE_TO_EXTERNAL_STIMULUS		349	-0.539536	-1.99788	0	0.00409753	0.46	1832	tags=31%, list=16%, signal=36%
GOBP_CELL_CELL_RECOGNITION	GOBP_CELL_CELL_RECOGNITION		34	-0.70551	-1.99693	0	0.00412515	0.463	1429	tags=44%, list=12%, signal=50%
GSE43863_NAIVE_VS_MEMORY_TH1_CD4_TCELL_D150_LCMV_UP	GSE43863_NAIVE_VS_MEMORY_TH1_CD4_TCELL_D150_LCMV_UP		101	-0.606828	-1.99645	0	0.00415881	0.468	1668	tags=39%, list=14%, signal=45%
GSE19198_CTRL_VS_IL21_TREATED_TCELL_24H_UP	GSE19198_CTRL_VS_IL21_TREATED_TCELL_24H_UP		166	-0.580399	-1.99635	0	0.00414076	0.469	2483	tags=44%, list=21%, signal=55%
GOBP_TAXIS	GOBP_TAXIS		449	-0.528855	-1.99602	0	0.00414198	0.472	1738	tags=35%, list=15%, signal=39%
GOBP_NEGATIVE_REGULATION_OF_ADAPTIVE_IMMUNE_RESPONSE	GOBP_NEGATIVE_REGULATION_OF_ADAPTIVE_IMMUNE_RESPONSE		38	-0.707295	-1.9959	0	0.00413057	0.472	713	tags=32%, list=6%, signal=33%
GSE13411_PLASMA_CELL_VS_MEMORY_BCELL_UP	GSE13411_PLASMA_CELL_VS_MEMORY_BCELL_UP		140	-0.582444	-1.99474	0	0.00417604	0.474	1857	tags=34%, list=16%, signal=39%
GOBP_T_CELL_DIFFERENTIATION_INVOLVED_IN_IMMUNE_RESPONSE	GOBP_T_CELL_DIFFERENTIATION_INVOLVED_IN_IMMUNE_RESPONSE		60	-0.659989	-1.99446	0	0.00416449	0.475	1565	tags=48%, list=13%, signal=55%
GOMF_CYTOKINE_BINDING	GOMF_CYTOKINE_BINDING		104	-0.610163	-1.99446	0	0.00414069	0.475	1954	tags=51%, list=17%, signal=61%
GOCC_SIDE_OF_MEMBRANE	GOCC_SIDE_OF_MEMBRANE		368	-0.538077	-1.99151	0	0.00433353	0.493	1720	tags=33%, list=15%, signal=38%
GOBP_ENTRY_INTO_HOST	GOBP_ENTRY_INTO_HOST		110	-0.602742	-1.99039	0	0.00439497	0.501	1839	tags=41%, list=16%, signal=48%
GSE9988_LOW_LPS_VS_CTRL_TREATED_MONOCYTE_UP	GSE9988_LOW_LPS_VS_CTRL_TREATED_MONOCYTE_UP		141	-0.581627	-1.99026	0	0.00439478	0.503	2063	tags=40%, list=17%, signal=48%
HALLMARK_IL6_JAK_STAT3_SIGNALING	HALLMARK_IL6_JAK_STAT3_SIGNALING		69	-0.638241	-1.98792	0	0.00454691	0.513	1687	tags=54%, list=14%, signal=62%
GOBP_POSITIVE_REGULATION_OF_INTERLEUKIN_4_PRODUCTION	GOBP_POSITIVE_REGULATION_OF_INTERLEUKIN_4_PRODUCTION		18	-0.810924	-1.98595	0	0.00471573	0.528	1531	tags=72%, list=13%, signal=83%
GSE9650_NAIVE_VS_MEMORY_CD8_TCELL_DN	GSE9650_NAIVE_VS_MEMORY_CD8_TCELL_DN		167	-0.570417	-1.98556	0	0.00471375	0.528	1142	tags=28%, list=10%, signal=31%
GSE22886_NAIVE_CD8_TCELL_VS_NEUTROPHIL_DN	GSE22886_NAIVE_CD8_TCELL_VS_NEUTROPHIL_DN		128	-0.591658	-1.98532	0	0.00472393	0.531	1183	tags=36%, list=10%, signal=40%
GSE17721_PAM3CSK4_VS_GADIQUIMOD_1H_BMDC_UP	GSE17721_PAM3CSK4_VS_GADIQUIMOD_1H_BMDC_UP		141	-0.587196	-1.98466	0	0.00476957	0.538	1768	tags=38%, list=15%, signal=44%
GOMF_CHEMOKINE_RECEPTOR_BINDING	GOMF_CHEMOKINE_RECEPTOR_BINDING		29	-0.753187	-1.98388	0.00164204	0.0048029	0.542	806	tags=41%, list=7%, signal=44%
GAUCHER_PBMC_YF_VAX_STAMARIL_UNKNOWN_AGE_10DY_UP	GAUCHER_PBMC_YF_VAX_STAMARIL_UNKNOWN_AGE_10DY_UP		158	-0.575381	-1.98323	0	0.00484192	0.545	2175	tags=43%, list=18%, signal=52%
RPS14_DN.V1_UP	RPS14_DN.V1_UP		142	-0.587788	-1.98251	0	0.00488614	0.552	2082	tags=42%, list=18%, signal=50%
GSE42021_CD24INT_VS_CD24LOW_TCONV_THYMUS_DN	GSE42021_CD24INT_VS_CD24LOW_TCONV_THYMUS_DN		147	-0.573186	-1.98202	0	0.00488921	0.554	2240	tags=44%, list=19%, signal=54%
KAECH_NAIVE_VS_MEMORY_CD8_TCELL_DN	KAECH_NAIVE_VS_MEMORY_CD8_TCELL_DN		168	-0.578297	-1.98201	0	0.0048632	0.554	1142	tags=30%, list=10%, signal=32%
GSE26343_UNSTIM_VS_LPS_STIM_NFAT5_KO_MACROPHAGE_DN	GSE26343_UNSTIM_VS_LPS_STIM_NFAT5_KO_MACROPHAGE_DN		172	-0.572166	-1.97841	0	0.00513144	0.577	1681	tags=38%, list=14%, signal=44%
KEGG_CELL_ADHESION_MOLECULES_CAMS	KEGG_CELL_ADHESION_MOLECULES_CAMS		80	-0.630851	-1.97696	0	0.0051961	0.583	1720	tags=45%, list=15%, signal=52%
GSE32986_CURDLAN_HIGHDOSE_VS_GMCSF_AND_CURDLAN_HIGHDOSE_STIM_DC_DN	GSE32986_CURDLAN_HIGHDOSE_VS_GMCSF_AND_CURDLAN_HIGHDOSE_STIM_DC_DN		165	-0.572278	-1.97672	0	0.00520889	0.588	1681	tags=38%, list=14%, signal=44%
GSE10325_CD4_TCELL_VS_BCELL_UP	GSE10325_CD4_TCELL_VS_BCELL_UP		170	-0.572046	-1.97634	0	0.0052273	0.591	1705	tags=37%, list=14%, signal=43%
GOBP_REGULATION_OF_CELL_KILLING	GOBP_REGULATION_OF_CELL_KILLING		60	-0.657285	-1.97612	0	0.00523412	0.594	1821	tags=47%, list=15%, signal=55%
GSE34156_UNTREATED_VS_6H_TLR1_TLR2_LIGAND_TREATED_MONOCYTE_UP	GSE34156_UNTREATED_VS_6H_TLR1_TLR2_LIGAND_TREATED_MONOCYTE_UP		156	-0.574071	-1.97606	0	0.00522967	0.594	1398	tags=35%, list=12%, signal=39%
GOBP_POSITIVE_REGULATION_OF_ADAPTIVE_IMMUNE_RESPONSE	GOBP_POSITIVE_REGULATION_OF_ADAPTIVE_IMMUNE_RESPONSE		78	-0.629654	-1.97584	0	0.00521405	0.595	1706	tags=38%, list=14%, signal=45%
GOBP_CYTOKINE_PRODUCTION_INVOLVED_IN_IMMUNE_RESPONSE	GOBP_CYTOKINE_PRODUCTION_INVOLVED_IN_IMMUNE_RESPONSE		75	-0.6324	-1.97559	0	0.0052042	0.597	1976	tags=45%, list=17%, signal=54%
MATSUMIYA_PBMC_MODIFIED_VACCINIA_ANKARA_VACCINE_AGE_18_55YO_2DY_UP	MATSUMIYA_PBMC_MODIFIED_VACCINIA_ANKARA_VACCINE_AGE_18_55YO_2DY_UP		39	-0.696444	-1.97497	0.00148588	0.00523857	0.603	1838	tags=59%, list=16%, signal=70%
GOBP_PHAGOCYTOSIS	GOBP_PHAGOCYTOSIS		219	-0.560179	-1.97461	0	0.00526713	0.608	1620	tags=26%, list=14%, signal=30%
GOBP_REGULATION_OF_CD4_POSITIVE_ALPHA_BETA_T_CELL_DIFFERENTIATION	GOBP_REGULATION_OF_CD4_POSITIVE_ALPHA_BETA_T_CELL_DIFFERENTIATION		43	-0.700073	-1.97444	0	0.00526806	0.61	1515	tags=47%, list=13%, signal=53%
GSE22196_HEALTHY_VS_OBESE_MOUSE_SKIN_GAMMADELTA_TCELL_DN	GSE22196_HEALTHY_VS_OBESE_MOUSE_SKIN_GAMMADELTA_TCELL_DN		163	-0.568441	-1.97383	0	0.00531798	0.616	1650	tags=35%, list=14%, signal=40%
HOEK_NK_CELL_2011_2012_TIV_3D_VS_0DY_ADULT_3D_DN	HOEK_NK_CELL_2011_2012_TIV_3D_VS_0DY_ADULT_3D_DN		167	-0.570872	-1.97294	0	0.00539988	0.625	2150	tags=44%, list=18%, signal=53%
GOBP_LYMPHOCYTE_ACTIVATION_INVOLVED_IN_IMMUNE_RESPONSE	GOBP_LYMPHOCYTE_ACTIVATION_INVOLVED_IN_IMMUNE_RESPONSE		144	-0.584404	-1.97197	0	0.0054703	0.63	1711	tags=35%, list=14%, signal=41%
GOBP_NEGATIVE_REGULATION_OF_CYTOKINE_PRODUCTION	GOBP_NEGATIVE_REGULATION_OF_CYTOKINE_PRODUCTION		206	-0.557866	-1.96922	0	0.00561504	0.643	1998	tags=38%, list=17%, signal=45%
GOBP_MONONUCLEAR_CELL_MIGRATION	GOBP_MONONUCLEAR_CELL_MIGRATION		136	-0.585816	-1.96653	0	0.00582278	0.662	1616	tags=34%, list=14%, signal=39%
GSE21360_SECONDARY_VS_QUATERNARY_MEMORY_CD8_TCELL_UP	GSE21360_SECONDARY_VS_QUATERNARY_MEMORY_CD8_TCELL_UP		145	-0.573349	-1.96653	0	0.00579438	0.662	2217	tags=45%, list=19%, signal=55%
GOBP_CELL_KILLING	GOBP_CELL_KILLING		87	-0.620549	-1.96623	0	0.00579798	0.664	1952	tags=44%, list=17%, signal=52%
GOBP_LEUKOCYTE_PROLIFERATION	GOBP_LEUKOCYTE_PROLIFERATION		221	-0.552379	-1.96587	0	0.0058382	0.668	1729	tags=34%, list=15%, signal=39%
ALK_DN.V1_UP	ALK_DN.V1_UP		89	-0.618805	-1.9641	0	0.00603	0.684	1593	tags=49%, list=13%, signal=57%
GOBP_B_CELL_RECEPTOR_SIGNALING_PATHWAY	GOBP_B_CELL_RECEPTOR_SIGNALING_PATHWAY		61	-0.641797	-1.9638	0	0.00602204	0.684	1647	tags=28%, list=14%, signal=32%
GSE29618_BCELL_VS_MDC_DAY7_FLU_VACCINE_DN	GSE29618_BCELL_VS_MDC_DAY7_FLU_VACCINE_DN		165	-0.563619	-1.96315	0	0.00604526	0.688	1820	tags=36%, list=15%, signal=42%
GOBP_T_CELL_CYTOKINE_PRODUCTION	GOBP_T_CELL_CYTOKINE_PRODUCTION		29	-0.741639	-1.96298	0.00315457	0.00603735	0.689	713	tags=38%, list=6%, signal=40%
GOLDRATH_NAIVE_VS_MEMORY_CD8_TCELL_DN	GOLDRATH_NAIVE_VS_MEMORY_CD8_TCELL_DN		170	-0.562776	-1.96268	0	0.0060242	0.69	2003	tags=39%, list=17%, signal=47%
GOBP_RESPONSE_TO_BACTERIUM	GOBP_RESPONSE_TO_BACTERIUM		366	-0.530274	-1.96225	0	0.00604705	0.694	1699	tags=32%, list=14%, signal=36%
GOBP_REGULATION_OF_HEMOPOIESIS	GOBP_REGULATION_OF_HEMOPOIESIS		299	-0.533428	-1.96192	0	0.00605453	0.695	1711	tags=28%, list=14%, signal=32%
GOBP_POSITIVE_REGULATION_OF_PROTEIN_KINASE_B_SIGNALING	GOBP_POSITIVE_REGULATION_OF_PROTEIN_KINASE_B_SIGNALING		124	-0.580776	-1.96086	0	0.00614278	0.699	1577	tags=35%, list=13%, signal=40%
SCHERER_PBMC_APSV_WETVAX_AGE_18_32YO_2_TO_4DY_UP	SCHERER_PBMC_APSV_WETVAX_AGE_18_32YO_2_TO_4DY_UP		49	-0.673273	-1.95903	0.00151057	0.00640706	0.713	1688	tags=51%, list=14%, signal=59%
GOMF_CYTOKINE_RECEPTOR_BINDING	GOMF_CYTOKINE_RECEPTOR_BINDING		160	-0.564238	-1.95763	0	0.00649305	0.719	2017	tags=38%, list=17%, signal=45%
GSE37301_HEMATOPOIETIC_STEM_CELL_VS_CD4_TCELL_UP	GSE37301_HEMATOPOIETIC_STEM_CELL_VS_CD4_TCELL_UP		144	-0.576649	-1.9571	0	0.00653855	0.724	2255	tags=43%, list=19%, signal=53%
GOBP_LEUKOCYTE_CELL_CELL_ADHESION	GOBP_LEUKOCYTE_CELL_CELL_ADHESION		279	-0.539011	-1.95699	0	0.00651365	0.724	2064	tags=39%, list=17%, signal=47%
NAKAYA_PBMC_FLUAD_MALE_AGE_14_27YO_1D_POSTBOOST_VS_0D_PREIMM_MF59_ADJUVANTED_1DY_ATIV_UP	NAKAYA_PBMC_FLUAD_MALE_AGE_14_27YO_1D_POSTBOOST_VS_0D_PREIMM_MF59_ADJUVANTED_1DY_ATIV_UP		30	-0.734632	-1.95652	0	0.00654838	0.727	1201	tags=47%, list=10%, signal=52%
GSE19888_CTRL_VS_TCELL_MEMBRANES_ACT_MAST_CELL_PRETREAT_A3R_INH_DN	GSE19888_CTRL_VS_TCELL_MEMBRANES_ACT_MAST_CELL_PRETREAT_A3R_INH_DN		158	-0.567892	-1.95651	0	0.00651875	0.727	2378	tags=44%, list=20%, signal=54%
GSE5542_UNTREATED_VS_IFNG_TREATED_EPITHELIAL_CELLS_24H_UP	GSE5542_UNTREATED_VS_IFNG_TREATED_EPITHELIAL_CELLS_24H_UP		169	-0.570225	-1.95605	0	0.00654346	0.732	2122	tags=41%, list=18%, signal=49%
GSE2706_R848_VS_R848_AND_LPS_2H_STIM_DC_DN	GSE2706_R848_VS_R848_AND_LPS_2H_STIM_DC_DN		123	-0.581846	-1.95555	0	0.00656789	0.736	1993	tags=44%, list=17%, signal=52%
GOBP_MYELOID_LEUKOCYTE_ACTIVATION	GOBP_MYELOID_LEUKOCYTE_ACTIVATION		491	-0.514474	-1.95448	0	0.00663109	0.74	2025	tags=34%, list=17%, signal=39%
GSE9988_LPS_VS_CTRL_TREATED_MONOCYTE_UP	GSE9988_LPS_VS_CTRL_TREATED_MONOCYTE_UP		141	-0.577342	-1.95357	0	0.00671804	0.747	1476	tags=32%, list=12%, signal=36%
GSE30083_SP3_VS_SP4_THYMOCYTE_DN	GSE30083_SP3_VS_SP4_THYMOCYTE_DN		169	-0.560582	-1.95296	0	0.00675112	0.749	1536	tags=32%, list=13%, signal=36%
KEGG_GRAFT_VERSUS_HOST_DISEASE	KEGG_GRAFT_VERSUS_HOST_DISEASE		17	-0.818987	-1.9525	0.00173611	0.00676948	0.752	602	tags=47%, list=5%, signal=50%
GSE22886_DAY0_VS_DAY1_MONOCYTE_IN_CULTURE_DN	GSE22886_DAY0_VS_DAY1_MONOCYTE_IN_CULTURE_DN		164	-0.56847	-1.95221	0	0.00677327	0.752	1811	tags=38%, list=15%, signal=44%
GOBP_REGULATION_OF_LEUKOCYTE_PROLIFERATION	GOBP_REGULATION_OF_LEUKOCYTE_PROLIFERATION		174	-0.563012	-1.9515	0	0.00683412	0.757	1729	tags=36%, list=15%, signal=42%
GOBP_REGULATION_OF_T_HELPER_CELL_DIFFERENTIATION	GOBP_REGULATION_OF_T_HELPER_CELL_DIFFERENTIATION		33	-0.708531	-1.95078	0	0.00688497	0.762	1711	tags=55%, list=14%, signal=64%
GSE37605_TREG_VS_TCONV_NOD_FOXP3_FUSION_GFP_UP	GSE37605_TREG_VS_TCONV_NOD_FOXP3_FUSION_GFP_UP		101	-0.600129	-1.94795	0	0.00717613	0.773	1678	tags=39%, list=14%, signal=45%
GSE10325_CD4_TCELL_VS_MYELOID_DN	GSE10325_CD4_TCELL_VS_MYELOID_DN		161	-0.569953	-1.94773	0	0.00717799	0.777	1858	tags=40%, list=16%, signal=47%
GSE360_T_GONDII_VS_M_TUBERCULOSIS_DC_DN	GSE360_T_GONDII_VS_M_TUBERCULOSIS_DC_DN		129	-0.57533	-1.94687	0	0.00730642	0.784	1513	tags=26%, list=13%, signal=30%
GSE2706_UNSTIM_VS_2H_R848_DC_DN	GSE2706_UNSTIM_VS_2H_R848_DC_DN		141	-0.569817	-1.94521	0	0.00751706	0.795	1710	tags=42%, list=14%, signal=48%
LI_PBMC_MENOMUNE_A_C_Y_W_135_AGE_18_45YO_CORRELATED_WITH_ANTIBODY_RESPONSE_3DY_POSITIVE	LI_PBMC_MENOMUNE_A_C_Y_W_135_AGE_18_45YO_CORRELATED_WITH_ANTIBODY_RESPONSE_3DY_POSITIVE		31	-0.722092	-1.94496	0	0.00753139	0.799	1720	tags=58%, list=15%, signal=68%
GOBP_PHAGOCYTOSIS_RECOGNITION	GOBP_PHAGOCYTOSIS_RECOGNITION		21	-0.782145	-1.94492	0	0.00750407	0.799	244	tags=29%, list=2%, signal=29%
GSE19923_WT_VS_HEB_AND_E2A_KO_DP_THYMOCYTE_DN	GSE19923_WT_VS_HEB_AND_E2A_KO_DP_THYMOCYTE_DN		172	-0.563712	-1.94478	0	0.00747702	0.8	2149	tags=34%, list=18%, signal=41%
TGFB_UP.V1_UP	TGFB_UP.V1_UP		144	-0.562048	-1.94467	0	0.00745928	0.801	2295	tags=40%, list=19%, signal=49%
ZAK_PBMC_MRKAD5_HIV_1_GAG_POL_NEF_AGE_20_50YO_3DY_UP	ZAK_PBMC_MRKAD5_HIV_1_GAG_POL_NEF_AGE_20_50YO_3DY_UP		99	-0.594261	-1.94461	0	0.00744182	0.801	2527	tags=58%, list=21%, signal=73%
GOBP_POSITIVE_REGULATION_OF_ALPHA_BETA_T_CELL_DIFFERENTIATION	GOBP_POSITIVE_REGULATION_OF_ALPHA_BETA_T_CELL_DIFFERENTIATION		42	-0.681923	-1.94451	0	0.00742443	0.801	1515	tags=45%, list=13%, signal=52%
GOBP_POSITIVE_REGULATION_OF_DEFENSE_RESPONSE	GOBP_POSITIVE_REGULATION_OF_DEFENSE_RESPONSE		245	-0.543653	-1.94355	0	0.00752936	0.805	1650	tags=27%, list=14%, signal=31%
GSE6269_FLU_VS_STAPH_AUREUS_INF_PBMC_DN	GSE6269_FLU_VS_STAPH_AUREUS_INF_PBMC_DN		138	-0.573788	-1.94312	0	0.0075749	0.808	2891	tags=59%, list=24%, signal=78%
HALLMARK_IL2_STAT5_SIGNALING	HALLMARK_IL2_STAT5_SIGNALING		173	-0.556278	-1.9431	0	0.00754819	0.809	2037	tags=47%, list=17%, signal=56%
HOWARD_DENDRITIC_CELL_INACT_MONOV_INFLUENZA_A_INDONESIA_05_2005_H5N1_AGE_18_49YO_1DY_UP	HOWARD_DENDRITIC_CELL_INACT_MONOV_INFLUENZA_A_INDONESIA_05_2005_H5N1_AGE_18_49YO_1DY_UP		106	-0.591678	-1.94297	0	0.00754859	0.811	1422	tags=39%, list=12%, signal=44%
GOBP_NEGATIVE_REGULATION_OF_LYMPHOCYTE_ACTIVATION	GOBP_NEGATIVE_REGULATION_OF_LYMPHOCYTE_ACTIVATION		112	-0.591792	-1.94294	0	0.0075222	0.811	2166	tags=43%, list=18%, signal=52%
LI_PBMC_MENACTRA_AGE_18_45YO_ANTI_POLYSACCHARIDE_ANTIBODY_CORRELATION_PROFILE_3DY_UP	LI_PBMC_MENACTRA_AGE_18_45YO_ANTI_POLYSACCHARIDE_ANTIBODY_CORRELATION_PROFILE_3DY_UP		24	-0.753132	-1.94237	0	0.00751825	0.813	1174	tags=54%, list=10%, signal=60%
GSE25123_WT_VS_PPARG_KO_MACROPHAGE_UP	GSE25123_WT_VS_PPARG_KO_MACROPHAGE_UP		144	-0.579746	-1.94218	0	0.00749662	0.813	1522	tags=33%, list=13%, signal=38%
GOBP_NEGATIVE_REGULATION_OF_CELL_ACTIVATION	GOBP_NEGATIVE_REGULATION_OF_CELL_ACTIVATION		149	-0.573491	-1.9421	0	0.00747076	0.813	2166	tags=44%, list=18%, signal=53%
GOBP_INTERFERON_GAMMA_PRODUCTION	GOBP_INTERFERON_GAMMA_PRODUCTION		76	-0.626577	-1.94093	0	0.00753723	0.815	2063	tags=51%, list=17%, signal=62%
GOBP_POSITIVE_REGULATION_OF_CHEMOTAXIS	GOBP_POSITIVE_REGULATION_OF_CHEMOTAXIS		104	-0.586524	-1.93984	0	0.00763797	0.821	1575	tags=37%, list=13%, signal=42%
GSE7219_UNSTIM_VS_LPS_AND_ANTI_CD40_STIM_NIK_NFKB2_KO_DC_DN	GSE7219_UNSTIM_VS_LPS_AND_ANTI_CD40_STIM_NIK_NFKB2_KO_DC_DN		174	-0.554829	-1.93856	0	0.00775522	0.828	2063	tags=45%, list=17%, signal=54%
GSE7460_CD8_TCELL_VS_CD4_TCELL_ACT_UP	GSE7460_CD8_TCELL_VS_CD4_TCELL_ACT_UP		158	-0.564485	-1.93834	0	0.00774606	0.829	1426	tags=31%, list=12%, signal=35%
KRAS.50_UP.V1_UP	KRAS.50_UP.V1_UP		36	-0.700431	-1.93649	0	0.00800397	0.836	1187	tags=47%, list=10%, signal=52%
GSE360_T_GONDII_VS_B_MALAYI_HIGH_DOSE_DC_UP	GSE360_T_GONDII_VS_B_MALAYI_HIGH_DOSE_DC_UP		138	-0.567979	-1.93556	0	0.00810107	0.84	2295	tags=43%, list=19%, signal=52%
GSE24634_TREG_VS_TCONV_POST_DAY10_IL4_CONVERSION_DN	GSE24634_TREG_VS_TCONV_POST_DAY10_IL4_CONVERSION_DN		163	-0.561208	-1.93535	0	0.00809503	0.843	1665	tags=42%, list=14%, signal=49%
GOBP_REGULATION_OF_B_CELL_MEDIATED_IMMUNITY	GOBP_REGULATION_OF_B_CELL_MEDIATED_IMMUNITY		43	-0.676051	-1.93398	0	0.0082677	0.847	1628	tags=37%, list=14%, signal=43%
GOBP_POSITIVE_REGULATION_OF_CD4_POSITIVE_ALPHA_BETA_T_CELL_DIFFERENTIATION	GOBP_POSITIVE_REGULATION_OF_CD4_POSITIVE_ALPHA_BETA_T_CELL_DIFFERENTIATION		28	-0.726392	-1.93376	0	0.00827794	0.85	1515	tags=57%, list=13%, signal=65%
GSE22025_TGFB1_VS_TGFB1_AND_PROGESTERONE_TREATED_CD4_TCELL_UP	GSE22025_TGFB1_VS_TGFB1_AND_PROGESTERONE_TREATED_CD4_TCELL_UP		140	-0.568279	-1.93312	0	0.00835554	0.853	2003	tags=36%, list=17%, signal=42%
GSE29618_PDC_VS_MDC_DAY7_FLU_VACCINE_DN	GSE29618_PDC_VS_MDC_DAY7_FLU_VACCINE_DN		157	-0.56241	-1.93251	0	0.00840316	0.853	1820	tags=36%, list=15%, signal=42%
GSE6269_E_COLI_VS_STAPH_AUREUS_INF_PBMC_DN	GSE6269_E_COLI_VS_STAPH_AUREUS_INF_PBMC_DN		144	-0.565144	-1.93245	0	0.00837501	0.853	1853	tags=38%, list=16%, signal=45%
GSE22935_WT_VS_MYD88_KO_MACROPHAGE_12H_MBOVIS_BCG_STIM_UP	GSE22935_WT_VS_MYD88_KO_MACROPHAGE_12H_MBOVIS_BCG_STIM_UP		158	-0.56065	-1.93156	0	0.00849753	0.86	2407	tags=43%, list=20%, signal=53%
GSE13522_WT_VS_IFNAR_KO_SKING_T_CRUZI_Y_STRAIN_INF_UP	GSE13522_WT_VS_IFNAR_KO_SKING_T_CRUZI_Y_STRAIN_INF_UP		165	-0.561197	-1.93136	0	0.00849836	0.86	2037	tags=45%, list=17%, signal=53%
GOBP_T_HELPER_17_TYPE_IMMUNE_RESPONSE	GOBP_T_HELPER_17_TYPE_IMMUNE_RESPONSE		27	-0.740235	-1.93043	0	0.00862348	0.866	1565	tags=48%, list=13%, signal=55%
GSE40274_CTRL_VS_FOXP3_AND_PBX1_TRANSDUCED_ACTIVATED_CD4_TCELL_UP	GSE40274_CTRL_VS_FOXP3_AND_PBX1_TRANSDUCED_ACTIVATED_CD4_TCELL_UP		126	-0.572889	-1.93005	0	0.00866506	0.866	1825	tags=33%, list=15%, signal=39%
GSE2770_IL12_AND_TGFB_VS_IL4_TREATED_ACT_CD4_TCELL_48H_DN	GSE2770_IL12_AND_TGFB_VS_IL4_TREATED_ACT_CD4_TCELL_48H_DN		109	-0.583923	-1.92772	0	0.00899843	0.88	1523	tags=30%, list=13%, signal=34%
GSE24634_IL4_VS_CTRL_TREATED_NAIVE_CD4_TCELL_DAY5_UP	GSE24634_IL4_VS_CTRL_TREATED_NAIVE_CD4_TCELL_DAY5_UP		160	-0.559719	-1.9277	0	0.0089646	0.88	2216	tags=42%, list=19%, signal=51%
QUEREC_PBMC_YF_17D_VACCINE_AGE_18_45YO_7DY_UP	QUEREC_PBMC_YF_17D_VACCINE_AGE_18_45YO_7DY_UP		36	-0.691577	-1.92726	0	0.00902084	0.881	2469	tags=72%, list=21%, signal=91%
GSE7509_UNSTIM_VS_FCGRIIB_STIM_DC_DN	GSE7509_UNSTIM_VS_FCGRIIB_STIM_DC_DN		147	-0.561481	-1.92651	0	0.00911731	0.885	1687	tags=37%, list=14%, signal=43%
GSE30971_CTRL_VS_LPS_STIM_MACROPHAGE_WBP7_KO_2H_UP	GSE30971_CTRL_VS_LPS_STIM_MACROPHAGE_WBP7_KO_2H_UP		143	-0.568687	-1.92648	0	0.00908342	0.885	1687	tags=35%, list=14%, signal=40%
MEK_UP.V1_UP	MEK_UP.V1_UP		150	-0.570878	-1.92645	0	0.00905783	0.885	1884	tags=41%, list=16%, signal=48%
GSE36891_UNSTIM_VS_POLYIC_TLR3_STIM_PERITONEAL_MACROPHAGE_UP	GSE36891_UNSTIM_VS_POLYIC_TLR3_STIM_PERITONEAL_MACROPHAGE_UP		101	-0.594899	-1.92638	0	0.00904047	0.885	1414	tags=43%, list=12%, signal=48%
GOBP_POSITIVE_REGULATION_OF_IMMUNE_EFFECTOR_PROCESS	GOBP_POSITIVE_REGULATION_OF_IMMUNE_EFFECTOR_PROCESS		164	-0.553748	-1.92483	0	0.00927559	0.898	1821	tags=41%, list=15%, signal=48%
GOBP_CD4_POSITIVE_OR_CD8_POSITIVE_ALPHA_BETA_T_CELL_LINEAGE_COMMITMENT	GOBP_CD4_POSITIVE_OR_CD8_POSITIVE_ALPHA_BETA_T_CELL_LINEAGE_COMMITMENT		17	-0.821383	-1.92453	0	0.00927757	0.9	1420	tags=65%, list=12%, signal=73%
GSE3565_DUSP1_VS_WT_SPLENOCYTES_UP	GSE3565_DUSP1_VS_WT_SPLENOCYTES_UP		131	-0.570589	-1.92348	0	0.00942276	0.902	1825	tags=39%, list=15%, signal=46%
GOBP_POSITIVE_REGULATION_OF_LEUKOCYTE_MIGRATION	GOBP_POSITIVE_REGULATION_OF_LEUKOCYTE_MIGRATION		101	-0.583578	-1.92303	0	0.0094479	0.903	1494	tags=32%, list=13%, signal=36%
GSE34156_UNTREATED_VS_24H_NOD2_LIGAND_TREATED_MONOCYTE_DN	GSE34156_UNTREATED_VS_24H_NOD2_LIGAND_TREATED_MONOCYTE_DN		159	-0.562937	-1.9227	0	0.00946098	0.905	1398	tags=33%, list=12%, signal=37%
GOBP_MACROPHAGE_CHEMOTAXIS	GOBP_MACROPHAGE_CHEMOTAXIS		27	-0.725312	-1.92245	0	0.00946612	0.907	1307	tags=48%, list=11%, signal=54%
GOBP_POSITIVE_REGULATION_OF_ERK1_AND_ERK2_CASCADE	GOBP_POSITIVE_REGULATION_OF_ERK1_AND_ERK2_CASCADE		126	-0.568296	-1.92127	0	0.00962821	0.91	1862	tags=40%, list=16%, signal=47%
GOBP_INFLAMMATORY_RESPONSE_TO_ANTIGENIC_STIMULUS	GOBP_INFLAMMATORY_RESPONSE_TO_ANTIGENIC_STIMULUS		35	-0.684895	-1.92098	0	0.00962102	0.912	1976	tags=51%, list=17%, signal=62%
GOBP_FC_RECEPTOR_SIGNALING_PATHWAY	GOBP_FC_RECEPTOR_SIGNALING_PATHWAY		158	-0.555523	-1.91967	0	0.00974223	0.914	1696	tags=20%, list=14%, signal=23%
GSE7509_DC_VS_MONOCYTE_WITH_FCGRIIB_STIM_DN	GSE7509_DC_VS_MONOCYTE_WITH_FCGRIIB_STIM_DN		165	-0.555747	-1.91904	0	0.00981619	0.917	2307	tags=38%, list=20%, signal=47%
GOBP_NEGATIVE_REGULATION_OF_IMMUNE_EFFECTOR_PROCESS	GOBP_NEGATIVE_REGULATION_OF_IMMUNE_EFFECTOR_PROCESS		88	-0.597165	-1.91893	0	0.00979686	0.917	1711	tags=36%, list=14%, signal=42%
GSE24142_EARLY_THYMIC_PROGENITOR_VS_DN2_THYMOCYTE_UP	GSE24142_EARLY_THYMIC_PROGENITOR_VS_DN2_THYMOCYTE_UP		167	-0.549891	-1.91892	0	0.00976224	0.917	1879	tags=38%, list=16%, signal=45%
GOBP_POSITIVE_REGULATION_OF_MACROPHAGE_MIGRATION	GOBP_POSITIVE_REGULATION_OF_MACROPHAGE_MIGRATION		19	-0.78257	-1.91853	0	0.00978917	0.917	1307	tags=53%, list=11%, signal=59%
GAUCHER_PBMC_YF_VAX_STAMARIL_UNKNOWN_AGE_60DY_UP	GAUCHER_PBMC_YF_VAX_STAMARIL_UNKNOWN_AGE_60DY_UP		44	-0.686058	-1.91828	0	0.00979701	0.917	1819	tags=50%, list=15%, signal=59%
GSE3039_NKT_CELL_VS_B2_BCELL_DN	GSE3039_NKT_CELL_VS_B2_BCELL_DN		159	-0.552138	-1.91796	0	0.00981226	0.918	2022	tags=42%, list=17%, signal=50%
LI_PBMC_MENOMUNE_A_C_Y_W_135_AGE_18_45YO_CORRELATED_WITH_ANTIBODY_RESPONSE_3DY_NEGATIVE	LI_PBMC_MENOMUNE_A_C_Y_W_135_AGE_18_45YO_CORRELATED_WITH_ANTIBODY_RESPONSE_3DY_NEGATIVE		20	-0.769591	-1.91788	0	0.00977807	0.918	1571	tags=65%, list=13%, signal=75%
GSE14415_INDUCED_TREG_VS_FOXP3_KO_INDUCED_TREG_IL2_CULTURE_UP	GSE14415_INDUCED_TREG_VS_FOXP3_KO_INDUCED_TREG_IL2_CULTURE_UP		138	-0.568597	-1.91765	0	0.00978955	0.918	929	tags=28%, list=8%, signal=30%
LI_PBMC_MENACTRA_AGE_18_45YO_CORRELATED_WITH_ANTI_DT_ANTIBODY_3DY_NEGATIVE	LI_PBMC_MENACTRA_AGE_18_45YO_CORRELATED_WITH_ANTI_DT_ANTIBODY_3DY_NEGATIVE		21	-0.755501	-1.91693	0	0.00989898	0.92	2365	tags=76%, list=20%, signal=95%
GOBP_CELLULAR_RESPONSE_TO_BIOTIC_STIMULUS	GOBP_CELLULAR_RESPONSE_TO_BIOTIC_STIMULUS		166	-0.550742	-1.91636	0	0.0099964	0.924	2063	tags=35%, list=17%, signal=42%
GOBP_TOLERANCE_INDUCTION	GOBP_TOLERANCE_INDUCTION		19	-0.779776	-1.91634	0	0.00996205	0.924	949	tags=47%, list=8%, signal=51%
GOBP_POSITIVE_REGULATION_OF_LEUKOCYTE_CELL_CELL_ADHESION	GOBP_POSITIVE_REGULATION_OF_LEUKOCYTE_CELL_CELL_ADHESION		186	-0.542131	-1.91619	0	0.00996904	0.924	1715	tags=36%, list=15%, signal=41%
GSE37533_UNTREATED_VS_PIOGLIZATONE_TREATED_CD4_TCELL_PPARG1_AND_FOXP3_TRASDUCED_UP	GSE37533_UNTREATED_VS_PIOGLIZATONE_TREATED_CD4_TCELL_PPARG1_AND_FOXP3_TRASDUCED_UP		171	-0.54973	-1.91523	0	0.0101395	0.927	1710	tags=34%, list=14%, signal=39%
GOCC_PLASMA_MEMBRANE_SIGNALING_RECEPTOR_COMPLEX	GOCC_PLASMA_MEMBRANE_SIGNALING_RECEPTOR_COMPLEX		125	-0.575525	-1.9144	0	0.0102421	0.932	1600	tags=34%, list=14%, signal=38%
GOBP_LYMPHOCYTE_COSTIMULATION	GOBP_LYMPHOCYTE_COSTIMULATION		47	-0.665301	-1.91439	0	0.0102111	0.932	1990	tags=47%, list=17%, signal=56%
GSE14769_UNSTIM_VS_40MIN_LPS_BMDM_DN	GSE14769_UNSTIM_VS_40MIN_LPS_BMDM_DN		166	-0.556709	-1.91414	0	0.0102318	0.933	2239	tags=39%, list=19%, signal=48%
FRANCO_BLOOD_SANOFI_PASTEUR_SA_INACTIVATED_INFLUENZA_VACCINE_CORRELATED_WITH_ANTIBODY_RESPONSE_AGE_18_40YO_1DY_POSITIVE	FRANCO_BLOOD_SANOFI_PASTEUR_SA_INACTIVATED_INFLUENZA_VACCINE_CORRELATED_WITH_ANTIBODY_RESPONSE_AGE_18_40YO_1DY_POSITIVE		101	-0.588863	-1.91411	0.00135685	0.0101974	0.933	2071	tags=44%, list=18%, signal=52%
GOBP_T_CELL_LINEAGE_COMMITMENT	GOBP_T_CELL_LINEAGE_COMMITMENT		20	-0.772196	-1.91203	0.00328947	0.0105361	0.938	1420	tags=55%, list=12%, signal=62%
GSE19888_ADENOSINE_A3R_INH_PRETREAT_AND_ACT_BY_A3R_VS_TCELL_MEMBRANES_ACT_MAST_CELL_UP	GSE19888_ADENOSINE_A3R_INH_PRETREAT_AND_ACT_BY_A3R_VS_TCELL_MEMBRANES_ACT_MAST_CELL_UP		157	-0.553989	-1.90962	0	0.0109092	0.948	2254	tags=43%, list=19%, signal=53%
GSE23321_CENTRAL_MEMORY_VS_NAIVE_CD8_TCELL_UP	GSE23321_CENTRAL_MEMORY_VS_NAIVE_CD8_TCELL_UP		153	-0.548706	-1.90937	0	0.0109129	0.951	1522	tags=30%, list=13%, signal=34%
GOBP_FC_EPSILON_RECEPTOR_SIGNALING_PATHWAY	GOBP_FC_EPSILON_RECEPTOR_SIGNALING_PATHWAY		102	-0.582712	-1.90841	0	0.011065	0.952	877	tags=10%, list=7%, signal=10%
GSE24142_EARLY_THYMIC_PROGENITOR_VS_DN2_THYMOCYTE_FETAL_UP	GSE24142_EARLY_THYMIC_PROGENITOR_VS_DN2_THYMOCYTE_FETAL_UP		164	-0.553653	-1.90723	0	0.0112342	0.953	1869	tags=40%, list=16%, signal=46%
GSE42021_CD24HI_VS_CD24LOW_TREG_THYMUS_DN	GSE42021_CD24HI_VS_CD24LOW_TREG_THYMUS_DN		135	-0.564678	-1.90695	0	0.0112403	0.953	2461	tags=49%, list=21%, signal=61%
GOMF_HORMONE_BINDING	GOMF_HORMONE_BINDING		44	-0.669444	-1.90569	0.00143678	0.0114472	0.956	1691	tags=36%, list=14%, signal=42%
GSE36078_WT_VS_IL1R_KO_LUNG_DC_AFTER_AD5_INF_UP	GSE36078_WT_VS_IL1R_KO_LUNG_DC_AFTER_AD5_INF_UP		150	-0.555058	-1.9056	0	0.0114347	0.956	2204	tags=45%, list=19%, signal=54%
QUEREC_PBMC_YF_17D_VACCINE_AGE_18_45YO_3DY_UP	QUEREC_PBMC_YF_17D_VACCINE_AGE_18_45YO_3DY_UP		36	-0.691577	-1.90501	0.0015748	0.0114972	0.957	2469	tags=72%, list=21%, signal=91%
GSE3565_CTRL_VS_LPS_INJECTED_SPLENOCYTES_UP	GSE3565_CTRL_VS_LPS_INJECTED_SPLENOCYTES_UP		150	-0.556723	-1.90341	0	0.0117616	0.961	2230	tags=44%, list=19%, signal=54%
KEGG_NEUROACTIVE_LIGAND_RECEPTOR_INTERACTION	KEGG_NEUROACTIVE_LIGAND_RECEPTOR_INTERACTION		90	-0.596681	-1.90334	0	0.0117234	0.961	1305	tags=38%, list=11%, signal=42%
GOBP_GLOMERULUS_DEVELOPMENT	GOBP_GLOMERULUS_DEVELOPMENT		44	-0.664597	-1.90304	0	0.0117454	0.963	1577	tags=45%, list=13%, signal=52%
GOMF_CCR_CHEMOKINE_RECEPTOR_BINDING	GOMF_CCR_CHEMOKINE_RECEPTOR_BINDING		19	-0.790556	-1.90181	0	0.0119672	0.965	806	tags=53%, list=7%, signal=56%
GOMF_G_PROTEIN_COUPLED_RECEPTOR_ACTIVITY	GOMF_G_PROTEIN_COUPLED_RECEPTOR_ACTIVITY		176	-0.54492	-1.90138	0	0.0120235	0.966	1305	tags=34%, list=11%, signal=38%
NOTCH_DN.V1_UP	NOTCH_DN.V1_UP		102	-0.579328	-1.89998	0	0.012233	0.97	1435	tags=34%, list=12%, signal=39%
GOBP_MACROPHAGE_DIFFERENTIATION	GOBP_MACROPHAGE_DIFFERENTIATION		34	-0.693841	-1.89943	0	0.0122914	0.972	1588	tags=44%, list=13%, signal=51%
HOWARD_MONOCYTE_INACT_MONOV_INFLUENZA_A_INDONESIA_05_2005_H5N1_AGE_18_49YO_1DY_UP	HOWARD_MONOCYTE_INACT_MONOV_INFLUENZA_A_INDONESIA_05_2005_H5N1_AGE_18_49YO_1DY_UP		153	-0.548948	-1.89924	0	0.0122904	0.972	1330	tags=34%, list=11%, signal=38%
GOBP_POSITIVE_REGULATION_OF_REACTIVE_OXYGEN_SPECIES_METABOLIC_PROCESS	GOBP_POSITIVE_REGULATION_OF_REACTIVE_OXYGEN_SPECIES_METABOLIC_PROCESS		71	-0.61474	-1.89865	0.00143678	0.0123586	0.974	1429	tags=32%, list=12%, signal=37%
GOBP_POSITIVE_REGULATION_OF_LEUKOCYTE_PROLIFERATION	GOBP_POSITIVE_REGULATION_OF_LEUKOCYTE_PROLIFERATION		108	-0.581493	-1.89848	0	0.0123505	0.974	1711	tags=39%, list=14%, signal=45%
EGFR_UP.V1_UP	EGFR_UP.V1_UP		161	-0.545942	-1.89827	0	0.012346	0.974	1684	tags=33%, list=14%, signal=38%
GOBP_LYMPHOCYTE_MIGRATION	GOBP_LYMPHOCYTE_MIGRATION		82	-0.596038	-1.89739	0	0.0124683	0.975	1241	tags=29%, list=11%, signal=32%
GSE42724_MEMORY_VS_B1_BCELL_DN	GSE42724_MEMORY_VS_B1_BCELL_DN		150	-0.554344	-1.8967	0	0.0125725	0.976	1780	tags=39%, list=15%, signal=45%
GOBP_NEGATIVE_REGULATION_OF_INNATE_IMMUNE_RESPONSE	GOBP_NEGATIVE_REGULATION_OF_INNATE_IMMUNE_RESPONSE		43	-0.680089	-1.89483	0.00147493	0.0129557	0.976	1001	tags=40%, list=8%, signal=43%
KEGG_JAK_STAT_SIGNALING_PATHWAY	KEGG_JAK_STAT_SIGNALING_PATHWAY		97	-0.57977	-1.89404	0	0.0130444	0.977	1711	tags=36%, list=14%, signal=42%
GOBP_MACROPHAGE_MIGRATION	GOBP_MACROPHAGE_MIGRATION		38	-0.676387	-1.8931	0	0.0131699	0.979	1317	tags=47%, list=11%, signal=53%
GSE36392_EOSINOPHIL_VS_NEUTROPHIL_IL25_TREATED_LUNG_UP	GSE36392_EOSINOPHIL_VS_NEUTROPHIL_IL25_TREATED_LUNG_UP		158	-0.557524	-1.89274	0	0.0132101	0.979	1796	tags=34%, list=15%, signal=40%
GOBP_POSITIVE_REGULATION_OF_SMOOTH_MUSCLE_CELL_PROLIFERATION	GOBP_POSITIVE_REGULATION_OF_SMOOTH_MUSCLE_CELL_PROLIFERATION		65	-0.612952	-1.89073	0	0.0136029	0.983	1530	tags=35%, list=13%, signal=40%
GSE10325_LUPUS_CD4_TCELL_VS_LUPUS_BCELL_UP	GSE10325_LUPUS_CD4_TCELL_VS_LUPUS_BCELL_UP		176	-0.546401	-1.89004	0	0.0137187	0.983	2453	tags=46%, list=21%, signal=57%
GSE14386_UNTREATED_VS_IFNA_TREATED_ACT_PBMC_MS_PATIENT_DN	GSE14386_UNTREATED_VS_IFNA_TREATED_ACT_PBMC_MS_PATIENT_DN		141	-0.559814	-1.88884	0	0.0139271	0.983	1768	tags=38%, list=15%, signal=45%
SOBOLEV_T_CELL_PANDEMRIX_AGE_18_64YO_1DY_UP	SOBOLEV_T_CELL_PANDEMRIX_AGE_18_64YO_1DY_UP		22	-0.759217	-1.8886	0.00162338	0.0139277	0.983	1127	tags=41%, list=10%, signal=45%
GSE26495_NAIVE_VS_PD1HIGH_CD8_TCELL_DN	GSE26495_NAIVE_VS_PD1HIGH_CD8_TCELL_DN		163	-0.547131	-1.88807	0	0.0140085	0.984	2253	tags=43%, list=19%, signal=52%
GSE18281_CORTICAL_VS_MEDULLARY_THYMOCYTE_UP	GSE18281_CORTICAL_VS_MEDULLARY_THYMOCYTE_UP		148	-0.556214	-1.88726	0	0.0140984	0.984	2590	tags=52%, list=22%, signal=66%
GOBP_DENDRITIC_CELL_DIFFERENTIATION	GOBP_DENDRITIC_CELL_DIFFERENTIATION		30	-0.69952	-1.88666	0.00157233	0.0142106	0.986	1646	tags=53%, list=14%, signal=62%
GOBP_MYELOID_LEUKOCYTE_MEDIATED_IMMUNITY	GOBP_MYELOID_LEUKOCYTE_MEDIATED_IMMUNITY		412	-0.505232	-1.88593	0	0.0143257	0.987	2025	tags=33%, list=17%, signal=38%
PATEL_SKIN_OF_BODY_ZOSTAVAX_AGE_70_93YO_VZV_CHALLENGE_6HR_UP	PATEL_SKIN_OF_BODY_ZOSTAVAX_AGE_70_93YO_VZV_CHALLENGE_6HR_UP		245	-0.521961	-1.8849	0	0.0145123	0.989	1810	tags=30%, list=15%, signal=35%
GSE36888_UNTREATED_VS_IL2_TREATED_TCELL_17H_DN	GSE36888_UNTREATED_VS_IL2_TREATED_TCELL_17H_DN		145	-0.558163	-1.88471	0	0.0145047	0.989	1717	tags=37%, list=15%, signal=43%
GOBP_NEUROINFLAMMATORY_RESPONSE	GOBP_NEUROINFLAMMATORY_RESPONSE		30	-0.715581	-1.88405	0	0.014605	0.99	1381	tags=47%, list=12%, signal=53%
GOCC_RECEPTOR_COMPLEX	GOCC_RECEPTOR_COMPLEX		265	-0.519556	-1.88385	0	0.0146068	0.99	1825	tags=38%, list=15%, signal=44%
GOMF_SODIUM_CHANNEL_ACTIVITY	GOMF_SODIUM_CHANNEL_ACTIVITY		19	-0.772118	-1.88358	0.00174216	0.0146315	0.99	721	tags=37%, list=6%, signal=39%
GSE21360_PRIMARY_VS_QUATERNARY_MEMORY_CD8_TCELL_UP	GSE21360_PRIMARY_VS_QUATERNARY_MEMORY_CD8_TCELL_UP		150	-0.555414	-1.88345	0	0.014614	0.991	2209	tags=45%, list=19%, signal=55%
GOBP_SODIUM_ION_HOMEOSTASIS	GOBP_SODIUM_ION_HOMEOSTASIS		28	-0.691431	-1.88333	0	0.0145997	0.991	1210	tags=32%, list=10%, signal=36%
GOBP_REGULATION_OF_MACROPHAGE_MIGRATION	GOBP_REGULATION_OF_MACROPHAGE_MIGRATION		29	-0.701268	-1.88318	0	0.0145728	0.992	1317	tags=48%, list=11%, signal=54%
GSE14769_UNSTIM_VS_80MIN_LPS_BMDM_DN	GSE14769_UNSTIM_VS_80MIN_LPS_BMDM_DN		169	-0.540723	-1.88239	0	0.0147449	0.992	2073	tags=38%, list=18%, signal=45%
GOBP_POSITIVE_REGULATION_OF_LOCOMOTION	GOBP_POSITIVE_REGULATION_OF_LOCOMOTION		425	-0.497399	-1.88222	0	0.0147337	0.992	2566	tags=41%, list=22%, signal=51%
GOMF_CHEMOATTRACTANT_ACTIVITY	GOMF_CHEMOATTRACTANT_ACTIVITY		19	-0.773189	-1.88158	0	0.0148594	0.992	1713	tags=58%, list=15%, signal=68%
GOBP_FOREBRAIN_CELL_MIGRATION	GOBP_FOREBRAIN_CELL_MIGRATION		32	-0.705765	-1.88129	0	0.0148731	0.992	1144	tags=28%, list=10%, signal=31%
GOBP_POTASSIUM_ION_HOMEOSTASIS	GOBP_POTASSIUM_ION_HOMEOSTASIS		18	-0.768683	-1.88078	0	0.0149408	0.992	478	tags=28%, list=4%, signal=29%
GSE35825_UNTREATED_VS_IFNG_STIM_MACROPHAGE_UP	GSE35825_UNTREATED_VS_IFNG_STIM_MACROPHAGE_UP		169	-0.545252	-1.8803	0	0.0150302	0.992	2429	tags=46%, list=21%, signal=57%
GOMF_RECEPTOR_REGULATOR_ACTIVITY	GOMF_RECEPTOR_REGULATOR_ACTIVITY		215	-0.526731	-1.87968	0	0.0151033	0.992	1420	tags=32%, list=12%, signal=36%
GOBP_CELLULAR_RESPONSE_TO_MOLECULE_OF_BACTERIAL_ORIGIN	GOBP_CELLULAR_RESPONSE_TO_MOLECULE_OF_BACTERIAL_ORIGIN		144	-0.555062	-1.87896	0	0.0152167	0.992	2063	tags=36%, list=17%, signal=43%
GSE36392_EOSINOPHIL_VS_MAC_IL25_TREATED_LUNG_UP	GSE36392_EOSINOPHIL_VS_MAC_IL25_TREATED_LUNG_UP		107	-0.57024	-1.87885	0	0.0151824	0.992	2131	tags=38%, list=18%, signal=46%
GSE19401_NAIVE_VS_IMMUNIZED_MOUSE_PLN_FOLLICULAR_DC_UP	GSE19401_NAIVE_VS_IMMUNIZED_MOUSE_PLN_FOLLICULAR_DC_UP		161	-0.543562	-1.87871	0	0.0151763	0.992	2289	tags=43%, list=19%, signal=53%
GOBP_ANTIGEN_RECEPTOR_MEDIATED_SIGNALING_PATHWAY	GOBP_ANTIGEN_RECEPTOR_MEDIATED_SIGNALING_PATHWAY		203	-0.525408	-1.87846	0	0.0151672	0.992	2063	tags=29%, list=17%, signal=35%
GOBP_REGULATION_OF_PRODUCTION_OF_MOLECULAR_MEDIATOR_OF_IMMUNE_RESPONSE	GOBP_REGULATION_OF_PRODUCTION_OF_MOLECULAR_MEDIATOR_OF_IMMUNE_RESPONSE		115	-0.563167	-1.87733	0	0.0153566	0.992	1711	tags=37%, list=14%, signal=43%
GSE34156_NOD2_LIGAND_VS_TLR1_TLR2_LIGAND_6H_TREATED_MONOCYTE_UP	GSE34156_NOD2_LIGAND_VS_TLR1_TLR2_LIGAND_6H_TREATED_MONOCYTE_UP		158	-0.545374	-1.87731	0	0.0153222	0.992	2490	tags=43%, list=21%, signal=54%
GOBP_REGULATION_OF_LEUKOCYTE_MIGRATION	GOBP_REGULATION_OF_LEUKOCYTE_MIGRATION		155	-0.54784	-1.87695	0	0.0153653	0.992	1715	tags=33%, list=15%, signal=38%
GSE41867_NAIVE_VS_DAY6_LCMV_ARMSTRONG_EFFECTOR_CD8_TCELL_DN	GSE41867_NAIVE_VS_DAY6_LCMV_ARMSTRONG_EFFECTOR_CD8_TCELL_DN		166	-0.536199	-1.87671	0	0.0153834	0.992	2212	tags=41%, list=19%, signal=50%
GOBP_POSITIVE_REGULATION_OF_INFLAMMATORY_RESPONSE	GOBP_POSITIVE_REGULATION_OF_INFLAMMATORY_RESPONSE		95	-0.57767	-1.87658	0	0.0153493	0.992	1583	tags=36%, list=13%, signal=41%
GSE23568_CTRL_TRANSDUCED_VS_WT_CD8_TCELL_DN	GSE23568_CTRL_TRANSDUCED_VS_WT_CD8_TCELL_DN		167	-0.54717	-1.87634	0	0.0153613	0.992	2386	tags=40%, list=20%, signal=49%
GOBP_KILLING_OF_CELLS_OF_OTHER_ORGANISM	GOBP_KILLING_OF_CELLS_OF_OTHER_ORGANISM		25	-0.726644	-1.87591	0	0.0154129	0.992	794	tags=36%, list=7%, signal=39%
NOTCH_DN.V1_DN	NOTCH_DN.V1_DN		96	-0.575502	-1.87474	0	0.0156012	0.992	2057	tags=43%, list=17%, signal=51%
GSE22886_NAIVE_TCELL_VS_MONOCYTE_DN	GSE22886_NAIVE_TCELL_VS_MONOCYTE_DN		172	-0.53572	-1.87471	0	0.0155698	0.992	2234	tags=44%, list=19%, signal=53%
GSE3039_CD4_TCELL_VS_B1_BCELL_DN	GSE3039_CD4_TCELL_VS_B1_BCELL_DN		136	-0.550853	-1.87426	0	0.0156205	0.992	2441	tags=45%, list=21%, signal=56%
GSE2706_UNSTIM_VS_8H_R848_DC_DN	GSE2706_UNSTIM_VS_8H_R848_DC_DN		151	-0.544594	-1.87414	0	0.0156015	0.993	1766	tags=39%, list=15%, signal=45%
GSE5589_LPS_AND_IL10_VS_LPS_AND_IL6_STIM_IL6_KO_MACROPHAGE_45MIN_UP	GSE5589_LPS_AND_IL10_VS_LPS_AND_IL6_STIM_IL6_KO_MACROPHAGE_45MIN_UP		162	-0.545251	-1.87374	0	0.0156578	0.994	2839	tags=51%, list=24%, signal=66%
GOBP_MOVEMENT_IN_HOST_ENVIRONMENT	GOBP_MOVEMENT_IN_HOST_ENVIRONMENT		127	-0.55123	-1.87349	0	0.0156777	0.994	1839	tags=35%, list=16%, signal=42%
GSE8515_IL1_VS_IL6_4H_STIM_MAC_UP	GSE8515_IL1_VS_IL6_4H_STIM_MAC_UP		157	-0.54646	-1.87308	0	0.0157396	0.994	1830	tags=34%, list=15%, signal=39%
HALLMARK_KRAS_SIGNALING_UP	HALLMARK_KRAS_SIGNALING_UP		160	-0.541877	-1.87298	0	0.0157234	0.994	1713	tags=39%, list=15%, signal=45%
GOBP_POSITIVE_REGULATION_OF_RESPONSE_TO_BIOTIC_STIMULUS	GOBP_POSITIVE_REGULATION_OF_RESPONSE_TO_BIOTIC_STIMULUS		171	-0.537564	-1.87254	0	0.0158057	0.994	1891	tags=27%, list=16%, signal=32%
GSE5542_UNTREATED_VS_IFNA_TREATED_EPITHELIAL_CELLS_6H_UP	GSE5542_UNTREATED_VS_IFNA_TREATED_EPITHELIAL_CELLS_6H_UP		161	-0.540167	-1.87238	0	0.0157954	0.994	2101	tags=39%, list=18%, signal=47%
GSE29618_PDC_VS_MDC_DN	GSE29618_PDC_VS_MDC_DN		160	-0.547235	-1.87223	0	0.0158175	0.994	2621	tags=43%, list=22%, signal=54%
GSE25085_FETAL_BM_VS_ADULT_BM_SP4_THYMIC_IMPLANT_DN	GSE25085_FETAL_BM_VS_ADULT_BM_SP4_THYMIC_IMPLANT_DN		180	-0.533394	-1.87025	0	0.0162236	0.996	1868	tags=36%, list=16%, signal=42%
GSE36888_UNTREATED_VS_IL2_TREATED_STAT5_AB_KNOCKIN_TCELL_2H_UP	GSE36888_UNTREATED_VS_IL2_TREATED_STAT5_AB_KNOCKIN_TCELL_2H_UP		155	-0.541135	-1.87022	0	0.0161827	0.996	2064	tags=41%, list=17%, signal=49%
GSE12003_4D_VS_8D_CULTURE_MIR223_KO_BM_PROGENITOR_UP	GSE12003_4D_VS_8D_CULTURE_MIR223_KO_BM_PROGENITOR_UP		76	-0.60194	-1.87006	0	0.0161538	0.996	2133	tags=45%, list=18%, signal=54%
GOBP_NEGATIVE_REGULATION_OF_LYMPHOCYTE_DIFFERENTIATION	GOBP_NEGATIVE_REGULATION_OF_LYMPHOCYTE_DIFFERENTIATION		38	-0.660474	-1.87005	0.0015528	0.0161133	0.996	837	tags=26%, list=7%, signal=28%
GSE7219_WT_VS_NIK_NFKB2_KO_DC_UP	GSE7219_WT_VS_NIK_NFKB2_KO_DC_UP		161	-0.537369	-1.86934	0	0.0162134	0.996	2253	tags=40%, list=19%, signal=49%
KRAS.600_UP.V1_UP	KRAS.600_UP.V1_UP		151	-0.542127	-1.86888	0	0.0162865	0.997	1424	tags=38%, list=12%, signal=43%
GOBP_POSITIVE_REGULATION_OF_TYPE_2_IMMUNE_RESPONSE	GOBP_POSITIVE_REGULATION_OF_TYPE_2_IMMUNE_RESPONSE		15	-0.822377	-1.86883	0.00335008	0.0162547	0.997	1496	tags=73%, list=13%, signal=84%
GSE22886_DAY1_VS_DAY7_MONOCYTE_IN_CULTURE_UP	GSE22886_DAY1_VS_DAY7_MONOCYTE_IN_CULTURE_UP		173	-0.535775	-1.86869	0	0.0162346	0.997	2282	tags=38%, list=19%, signal=47%
GOBP_SMOOTH_MUSCLE_CELL_PROLIFERATION	GOBP_SMOOTH_MUSCLE_CELL_PROLIFERATION		101	-0.573887	-1.86845	0	0.0162494	0.997	1588	tags=32%, list=13%, signal=36%
GOBP_TYPE_2_IMMUNE_RESPONSE	GOBP_TYPE_2_IMMUNE_RESPONSE		31	-0.679394	-1.86817	0	0.0162497	0.997	1976	tags=58%, list=17%, signal=70%
GSE37605_C57BL6_VS_NOD_FOXP3_FUSION_GFP_TREG_DN	GSE37605_C57BL6_VS_NOD_FOXP3_FUSION_GFP_TREG_DN		164	-0.542522	-1.86778	0	0.0162873	0.997	2498	tags=46%, list=21%, signal=57%
GOBP_POSITIVE_REGULATION_OF_OSTEOCLAST_DIFFERENTIATION	GOBP_POSITIVE_REGULATION_OF_OSTEOCLAST_DIFFERENTIATION		19	-0.754562	-1.86431	0.00674536	0.0170502	0.998	1420	tags=47%, list=12%, signal=54%
GSE24634_TEFF_VS_TCONV_DAY10_IN_CULTURE_DN	GSE24634_TEFF_VS_TCONV_DAY10_IN_CULTURE_DN		167	-0.532603	-1.8638	0	0.0171457	0.998	2099	tags=43%, list=18%, signal=51%
GSE3982_BCELL_VS_CENT_MEMORY_CD4_TCELL_DN	GSE3982_BCELL_VS_CENT_MEMORY_CD4_TCELL_DN		125	-0.552	-1.86302	0.00130208	0.0172832	0.998	1934	tags=34%, list=16%, signal=41%
GOBP_BONE_RESORPTION	GOBP_BONE_RESORPTION		46	-0.634786	-1.86236	0.0014771	0.0174201	0.998	1428	tags=41%, list=12%, signal=47%
GSE7460_FOXP3_MUT_VS_HET_ACT_TCONV_UP	GSE7460_FOXP3_MUT_VS_HET_ACT_TCONV_UP		129	-0.555101	-1.86234	0	0.0173747	0.998	2199	tags=41%, list=19%, signal=50%
GOBP_POSITIVE_REGULATION_OF_CYTOKINE_PRODUCTION_INVOLVED_IN_IMMUNE_RESPONSE	GOBP_POSITIVE_REGULATION_OF_CYTOKINE_PRODUCTION_INVOLVED_IN_IMMUNE_RESPONSE		43	-0.653513	-1.86175	0	0.0175023	0.998	1810	tags=44%, list=15%, signal=52%
GSE24634_TEFF_VS_TCONV_DAY7_IN_CULTURE_DN	GSE24634_TEFF_VS_TCONV_DAY7_IN_CULTURE_DN		163	-0.535789	-1.86158	0	0.0175163	0.998	2095	tags=42%, list=18%, signal=51%
GSE14769_UNSTIM_VS_60MIN_LPS_BMDM_DN	GSE14769_UNSTIM_VS_60MIN_LPS_BMDM_DN		177	-0.537557	-1.8614	0	0.0175048	0.998	2239	tags=37%, list=19%, signal=45%
GSE9960_HEALTHY_VS_GRAM_POS_SEPSIS_PBMC_DN	GSE9960_HEALTHY_VS_GRAM_POS_SEPSIS_PBMC_DN		149	-0.546769	-1.85964	0	0.0179651	0.998	2149	tags=40%, list=18%, signal=49%
PATEL_SKIN_OF_BODY_ZOSTAVAX_AGE_70_93YO_VZV_CHALLENGE_3DY_UP	PATEL_SKIN_OF_BODY_ZOSTAVAX_AGE_70_93YO_VZV_CHALLENGE_3DY_UP		90	-0.573617	-1.85851	0	0.0182496	0.999	2322	tags=46%, list=20%, signal=56%
GOMF_CORECEPTOR_ACTIVITY	GOMF_CORECEPTOR_ACTIVITY		38	-0.656981	-1.85748	0.00155521	0.0184626	1	1863	tags=47%, list=16%, signal=56%
GOBP_REGULATION_OF_T_HELPER_17_TYPE_IMMUNE_RESPONSE	GOBP_REGULATION_OF_T_HELPER_17_TYPE_IMMUNE_RESPONSE		18	-0.781076	-1.85721	0	0.0184936	1	1420	tags=50%, list=12%, signal=57%
GSE2935_UV_INACTIVATED_VS_LIVE_SENDAI_VIRUS_INF_MACROPHAGE_DN	GSE2935_UV_INACTIVATED_VS_LIVE_SENDAI_VIRUS_INF_MACROPHAGE_DN		139	-0.543606	-1.8572	0	0.0184464	1	1233	tags=29%, list=10%, signal=33%
GSE8835_CD4_VS_CD8_TCELL_CLL_PATIENT_UP	GSE8835_CD4_VS_CD8_TCELL_CLL_PATIENT_UP		154	-0.536807	-1.85718	0	0.0184022	1	1268	tags=30%, list=11%, signal=33%
GOCC_TERTIARY_GRANULE	GOCC_TERTIARY_GRANULE		119	-0.560329	-1.85713	0	0.0183693	1	1728	tags=36%, list=15%, signal=42%
GSE9988_ANTI_TREM1_AND_LPS_VS_VEHICLE_TREATED_MONOCYTES_UP	GSE9988_ANTI_TREM1_AND_LPS_VS_VEHICLE_TREATED_MONOCYTES_UP		137	-0.551474	-1.85691	0	0.0183669	1	2545	tags=44%, list=22%, signal=55%
GSE18281_SUBCAPSULAR_VS_CENTRAL_CORTICAL_REGION_OF_THYMUS_DN	GSE18281_SUBCAPSULAR_VS_CENTRAL_CORTICAL_REGION_OF_THYMUS_DN		165	-0.536263	-1.85608	0	0.0185242	1	2254	tags=43%, list=19%, signal=52%
GSE24634_TREG_VS_TCONV_POST_DAY7_IL4_CONVERSION_DN	GSE24634_TREG_VS_TCONV_POST_DAY7_IL4_CONVERSION_DN		170	-0.535183	-1.85594	0	0.0185078	1	1942	tags=35%, list=16%, signal=42%
GOBP_POSITIVE_REGULATION_OF_LYMPHOCYTE_DIFFERENTIATION	GOBP_POSITIVE_REGULATION_OF_LYMPHOCYTE_DIFFERENTIATION		86	-0.582714	-1.85523	0	0.0186638	1	1533	tags=36%, list=13%, signal=41%
TBK1.DN.48HRS_DN	TBK1.DN.48HRS_DN		44	-0.640712	-1.85481	0.00155039	0.018707	1	1549	tags=36%, list=13%, signal=42%
GSE10240_CTRL_VS_IL22_STIM_PRIMARY_BRONCHIAL_EPITHELIAL_CELLS_UP	GSE10240_CTRL_VS_IL22_STIM_PRIMARY_BRONCHIAL_EPITHELIAL_CELLS_UP		158	-0.534506	-1.85467	0	0.0186847	1	1300	tags=25%, list=11%, signal=27%
GOMF_GROWTH_FACTOR_ACTIVITY	GOMF_GROWTH_FACTOR_ACTIVITY		85	-0.58222	-1.85367	0	0.0189044	1	1395	tags=34%, list=12%, signal=38%
GSE9988_ANTI_TREM1_VS_CTRL_TREATED_MONOCYTES_UP	GSE9988_ANTI_TREM1_VS_CTRL_TREATED_MONOCYTES_UP		158	-0.535083	-1.85249	0	0.0192204	1	2422	tags=39%, list=21%, signal=49%
GOBP_POSITIVE_REGULATION_OF_LIPID_KINASE_ACTIVITY	GOBP_POSITIVE_REGULATION_OF_LIPID_KINASE_ACTIVITY		30	-0.686458	-1.85168	0.00162338	0.0193861	1	1577	tags=53%, list=13%, signal=61%
HP_PURPURA	HP_PURPURA		77	-0.587639	-1.85148	0	0.0193893	1	2580	tags=47%, list=22%, signal=59%
GSE7852_LN_VS_FAT_TCONV_DN	GSE7852_LN_VS_FAT_TCONV_DN		167	-0.532722	-1.85078	0	0.0195137	1	2675	tags=49%, list=23%, signal=62%
GSE9316_IL6_KO_VS_IFNG_KO_INVIVO_EXPANDED_CD4_TCELL_DN	GSE9316_IL6_KO_VS_IFNG_KO_INVIVO_EXPANDED_CD4_TCELL_DN		170	-0.535018	-1.84955	0	0.0197984	1	1687	tags=33%, list=14%, signal=38%
GSE32986_CURDLAN_LOWDOSE_VS_CURDLAN_HIGHDOSE_STIM_DC_DN	GSE32986_CURDLAN_LOWDOSE_VS_CURDLAN_HIGHDOSE_STIM_DC_DN		172	-0.533152	-1.84926	0	0.0198193	1	2178	tags=40%, list=18%, signal=48%
GOBP_NEGATIVE_REGULATION_OF_PRODUCTION_OF_MOLECULAR_MEDIATOR_OF_IMMUNE_RESPONSE	GOBP_NEGATIVE_REGULATION_OF_PRODUCTION_OF_MOLECULAR_MEDIATOR_OF_IMMUNE_RESPONSE		31	-0.678648	-1.84918	0.00159744	0.0198028	1	1976	tags=55%, list=17%, signal=66%
GSE3565_DUSP1_VS_WT_SPLENOCYTES_POST_LPS_INJECTION_DN	GSE3565_DUSP1_VS_WT_SPLENOCYTES_POST_LPS_INJECTION_DN		106	-0.563281	-1.84705	0	0.0203617	1	1687	tags=37%, list=14%, signal=43%
GSE24634_TEFF_VS_TCONV_DAY3_IN_CULTURE_DN	GSE24634_TEFF_VS_TCONV_DAY3_IN_CULTURE_DN		153	-0.536697	-1.84661	0	0.0204238	1	2370	tags=46%, list=20%, signal=56%
GOBP_CD8_POSITIVE_ALPHA_BETA_T_CELL_ACTIVATION	GOBP_CD8_POSITIVE_ALPHA_BETA_T_CELL_ACTIVATION		19	-0.758455	-1.84634	0.00169492	0.0204325	1	837	tags=37%, list=7%, signal=40%
GOBP_CD4_POSITIVE_ALPHA_BETA_T_CELL_CYTOKINE_PRODUCTION	GOBP_CD4_POSITIVE_ALPHA_BETA_T_CELL_CYTOKINE_PRODUCTION		15	-0.790086	-1.84525	0.00681431	0.020666	1	713	tags=47%, list=6%, signal=50%
GOBP_OOCYTE_DIFFERENTIATION	GOBP_OOCYTE_DIFFERENTIATION		29	-0.697794	-1.84481	0.00483092	0.0207635	1	617	tags=17%, list=5%, signal=18%
GOBP_REGULATION_OF_LEUKOCYTE_CHEMOTAXIS	GOBP_REGULATION_OF_LEUKOCYTE_CHEMOTAXIS		90	-0.565394	-1.8444	0	0.020816	1	1682	tags=33%, list=14%, signal=39%
GSE22886_NAIVE_TCELL_VS_NEUTROPHIL_DN	GSE22886_NAIVE_TCELL_VS_NEUTROPHIL_DN		134	-0.543657	-1.84408	0	0.0208551	1	1593	tags=34%, list=13%, signal=38%
GOBP_REGULATION_OF_TYPE_2_IMMUNE_RESPONSE	GOBP_REGULATION_OF_TYPE_2_IMMUNE_RESPONSE		26	-0.702595	-1.84369	0.00332779	0.0209333	1	1628	tags=58%, list=14%, signal=67%
GOBP_CELLULAR_DEFENSE_RESPONSE	GOBP_CELLULAR_DEFENSE_RESPONSE		32	-0.682031	-1.84343	0.00328947	0.0209641	1	1177	tags=34%, list=10%, signal=38%
GSE40068_CXCR5NEG_BCL6NEG_CD4_TCELL_VS_CXCR5POS_BCL6NEG_TFH_DN	GSE40068_CXCR5NEG_BCL6NEG_CD4_TCELL_VS_CXCR5POS_BCL6NEG_TFH_DN		167	-0.533841	-1.84318	0	0.0209845	1	2111	tags=42%, list=18%, signal=50%
GOBP_ENDOCYTOSIS	GOBP_ENDOCYTOSIS		425	-0.491202	-1.84254	0	0.021127	1	1982	tags=29%, list=17%, signal=34%
GOBP_FEMALE_GAMETE_GENERATION	GOBP_FEMALE_GAMETE_GENERATION		77	-0.581371	-1.84198	0	0.0212611	1	694	tags=19%, list=6%, signal=21%
GSE2706_UNSTIM_VS_2H_LPS_DC_DN	GSE2706_UNSTIM_VS_2H_LPS_DC_DN		140	-0.544961	-1.84192	0	0.0212209	1	2459	tags=49%, list=21%, signal=61%
GOBP_NEGATIVE_REGULATION_OF_LEUKOCYTE_APOPTOTIC_PROCESS	GOBP_NEGATIVE_REGULATION_OF_LEUKOCYTE_APOPTOTIC_PROCESS		35	-0.662969	-1.84187	0.00155521	0.0211836	1	1905	tags=46%, list=16%, signal=54%
GOBP_RESPONSE_TO_TUMOR_NECROSIS_FACTOR	GOBP_RESPONSE_TO_TUMOR_NECROSIS_FACTOR		223	-0.515644	-1.84181	0	0.021149	1	1650	tags=27%, list=14%, signal=31%
GOBP_REGULATION_OF_DEFENSE_RESPONSE	GOBP_REGULATION_OF_DEFENSE_RESPONSE		459	-0.485785	-1.8418	0	0.0211042	1	1740	tags=27%, list=15%, signal=30%
GSE24634_TREG_VS_TCONV_POST_DAY5_IL4_CONVERSION_DN	GSE24634_TREG_VS_TCONV_POST_DAY5_IL4_CONVERSION_DN		158	-0.541039	-1.84175	0	0.0210675	1	1822	tags=39%, list=15%, signal=46%
GOLDRATH_NAIVE_VS_EFF_CD8_TCELL_DN	GOLDRATH_NAIVE_VS_EFF_CD8_TCELL_DN		173	-0.526576	-1.84088	0.00121803	0.0212609	1	2020	tags=35%, list=17%, signal=42%
GSE9988_ANTI_TREM1_VS_VEHICLE_TREATED_MONOCYTES_UP	GSE9988_ANTI_TREM1_VS_VEHICLE_TREATED_MONOCYTES_UP		145	-0.540845	-1.83989	0	0.021459	1	2607	tags=45%, list=22%, signal=57%
GSE30971_CTRL_VS_LPS_STIM_MACROPHAGE_WBP7_KO_4H_UP	GSE30971_CTRL_VS_LPS_STIM_MACROPHAGE_WBP7_KO_4H_UP		150	-0.537391	-1.83939	0	0.0215437	1	1352	tags=28%, list=11%, signal=31%
GOBP_NEGATIVE_REGULATION_OF_CYTOKINE_PRODUCTION_INVOLVED_IN_IMMUNE_RESPONSE	GOBP_NEGATIVE_REGULATION_OF_CYTOKINE_PRODUCTION_INVOLVED_IN_IMMUNE_RESPONSE		21	-0.746201	-1.83936	0.00505051	0.0215011	1	1976	tags=62%, list=17%, signal=74%
HP_MENINGITIS	HP_MENINGITIS		55	-0.618667	-1.8391	0.00149477	0.0215169	1	1824	tags=38%, list=15%, signal=45%
GOBP_RECEPTOR_MEDIATED_ENDOCYTOSIS	GOBP_RECEPTOR_MEDIATED_ENDOCYTOSIS		189	-0.523008	-1.839	0	0.0214899	1	1865	tags=29%, list=16%, signal=34%
GSE13485_PRE_VS_POST_YF17D_VACCINATION_PBMC_DN	GSE13485_PRE_VS_POST_YF17D_VACCINATION_PBMC_DN		153	-0.534443	-1.83786	0	0.0217855	1	2571	tags=43%, list=22%, signal=54%
STK33_NOMO_UP	STK33_NOMO_UP		240	-0.51707	-1.83758	0	0.0218182	1	1825	tags=33%, list=15%, signal=38%
GSE42021_TREG_PLN_VS_TREG_PRECURSORS_THYMUS_DN	GSE42021_TREG_PLN_VS_TREG_PRECURSORS_THYMUS_DN		147	-0.536517	-1.83725	0	0.0218658	1	2584	tags=48%, list=22%, signal=61%
GOBP_REGULATION_OF_PHOSPHOLIPASE_C_ACTIVITY	GOBP_REGULATION_OF_PHOSPHOLIPASE_C_ACTIVITY		32	-0.679638	-1.83701	0.00323102	0.0218959	1	1577	tags=50%, list=13%, signal=58%
GOBP_MYELOID_LEUKOCYTE_DIFFERENTIATION	GOBP_MYELOID_LEUKOCYTE_DIFFERENTIATION		150	-0.544823	-1.83674	0	0.0219133	1	1688	tags=33%, list=14%, signal=38%
GOBP_REGULATION_OF_LEUKOCYTE_DEGRANULATION	GOBP_REGULATION_OF_LEUKOCYTE_DEGRANULATION		31	-0.684262	-1.83645	0.00484653	0.0219204	1	1818	tags=45%, list=15%, signal=53%
RELA_DN.V1_UP	RELA_DN.V1_UP		94	-0.566689	-1.83606	0	0.0219874	1	1357	tags=30%, list=11%, signal=33%
KEGG_SYSTEMIC_LUPUS_ERYTHEMATOSUS	KEGG_SYSTEMIC_LUPUS_ERYTHEMATOSUS		48	-0.62868	-1.8355	0.00147275	0.0220935	1	2573	tags=48%, list=22%, signal=61%
GOMF_CYSTEINE_TYPE_ENDOPEPTIDASE_INHIBITOR_ACTIVITY	GOMF_CYSTEINE_TYPE_ENDOPEPTIDASE_INHIBITOR_ACTIVITY		23	-0.719981	-1.83536	0.00159236	0.0220804	1	557	tags=26%, list=5%, signal=27%
HP_ALLERGY	HP_ALLERGY		21	-0.73638	-1.83513	0	0.0221118	1	629	tags=33%, list=5%, signal=35%
GSE42021_CD24HI_VS_CD24INT_TREG_THYMUS_DN	GSE42021_CD24HI_VS_CD24INT_TREG_THYMUS_DN		154	-0.530291	-1.83511	0	0.0220642	1	2449	tags=45%, list=21%, signal=57%
GSE3982_CTRL_VS_LPS_48H_DC_DN	GSE3982_CTRL_VS_LPS_48H_DC_DN		163	-0.53242	-1.83506	0	0.0220242	1	1687	tags=32%, list=14%, signal=37%
GOBP_NEGATIVE_REGULATION_OF_LEUKOCYTE_CELL_CELL_ADHESION	GOBP_NEGATIVE_REGULATION_OF_LEUKOCYTE_CELL_CELL_ADHESION		93	-0.571462	-1.83316	0.00140845	0.0225122	1	2160	tags=43%, list=18%, signal=52%
GOBP_REGULATION_OF_NATURAL_KILLER_CELL_MEDIATED_IMMUNITY	GOBP_REGULATION_OF_NATURAL_KILLER_CELL_MEDIATED_IMMUNITY		27	-0.704043	-1.83229	0.00165563	0.0226992	1	1266	tags=48%, list=11%, signal=54%
GOBP_REGULATION_OF_MACROPHAGE_ACTIVATION	GOBP_REGULATION_OF_MACROPHAGE_ACTIVATION		43	-0.646264	-1.832	0.00446429	0.022724	1	1976	tags=47%, list=17%, signal=56%
LI_PBMC_MENOMUNE_A_C_Y_W_135_AGE_18_45YO_3DY_UP	LI_PBMC_MENOMUNE_A_C_Y_W_135_AGE_18_45YO_3DY_UP		21	-0.735569	-1.83187	0	0.0227073	1	958	tags=43%, list=8%, signal=47%
GOBP_REGULATION_OF_CHEMOTAXIS	GOBP_REGULATION_OF_CHEMOTAXIS		170	-0.527046	-1.8314	0	0.0227709	1	2017	tags=39%, list=17%, signal=47%
GSE13484_3H_UNSTIM_VS_YF17D_VACCINE_STIM_PBMC_DN	GSE13484_3H_UNSTIM_VS_YF17D_VACCINE_STIM_PBMC_DN		158	-0.53184	-1.83038	0	0.0230116	1	2615	tags=45%, list=22%, signal=57%
GOBP_NEGATIVE_REGULATION_OF_HEMOPOIESIS	GOBP_NEGATIVE_REGULATION_OF_HEMOPOIESIS		71	-0.581373	-1.82946	0.0028169	0.0232052	1	1711	tags=35%, list=14%, signal=41%
GOBP_POSITIVE_REGULATION_OF_WOUND_HEALING	GOBP_POSITIVE_REGULATION_OF_WOUND_HEALING		40	-0.646728	-1.82933	0.00314961	0.0231828	1	1887	tags=48%, list=16%, signal=56%
GOBP_POSITIVE_REGULATION_OF_RESPONSE_TO_WOUNDING	GOBP_POSITIVE_REGULATION_OF_RESPONSE_TO_WOUNDING		48	-0.641863	-1.82932	0.00580551	0.0231364	1	1494	tags=42%, list=13%, signal=48%
GOBP_POSITIVE_REGULATION_OF_CYTOKINE_PRODUCTION	GOBP_POSITIVE_REGULATION_OF_CYTOKINE_PRODUCTION		303	-0.49871	-1.8291	0	0.0231454	1	1706	tags=32%, list=14%, signal=37%
QIU_PBMC_HEPTATITIS_B_SURFACE_ANTIGEN_AGE_UNDER50_NON_RESPONDERS_VS_RESPONDERS_7DY_UP	QIU_PBMC_HEPTATITIS_B_SURFACE_ANTIGEN_AGE_UNDER50_NON_RESPONDERS_VS_RESPONDERS_7DY_UP		20	-0.719176	-1.82886	0.0101868	0.0231638	1	1434	tags=55%, list=12%, signal=62%
NAKAYA_PBMC_IMUVAC_MALE_AGE_14_27YO_1D_POSTBOOST_VS_0DY_PREIMM_TIV_UP	NAKAYA_PBMC_IMUVAC_MALE_AGE_14_27YO_1D_POSTBOOST_VS_0DY_PREIMM_TIV_UP		31	-0.672944	-1.82851	0.00487013	0.0232062	1	1079	tags=45%, list=9%, signal=50%
GOBP_POSITIVE_REGULATION_OF_INTERLEUKIN_10_PRODUCTION	GOBP_POSITIVE_REGULATION_OF_INTERLEUKIN_10_PRODUCTION		26	-0.704799	-1.82815	0.00170068	0.0232699	1	2022	tags=58%, list=17%, signal=69%
SOBOLEV_PBMC_PANDEMRIX_AGE_18_64YO_7DY_DN	SOBOLEV_PBMC_PANDEMRIX_AGE_18_64YO_7DY_DN		20	-0.754615	-1.82778	0	0.0233358	1	1475	tags=65%, list=12%, signal=74%
GOBP_REGULATION_OF_SUPEROXIDE_METABOLIC_PROCESS	GOBP_REGULATION_OF_SUPEROXIDE_METABOLIC_PROCESS		19	-0.756975	-1.82759	0.00329489	0.0233706	1	1810	tags=58%, list=15%, signal=68%
GOMF_GLYCOSAMINOGLYCAN_BINDING	GOMF_GLYCOSAMINOGLYCAN_BINDING		143	-0.533186	-1.827	0	0.0235048	1	1530	tags=35%, list=13%, signal=40%
GSE9988_ANTI_TREM1_VS_ANTI_TREM1_AND_LPS_MONOCYTE_DN	GSE9988_ANTI_TREM1_VS_ANTI_TREM1_AND_LPS_MONOCYTE_DN		144	-0.536822	-1.82654	0	0.0236028	1	2545	tags=47%, list=22%, signal=59%
GOBP_RESPONSE_TO_MOLECULE_OF_BACTERIAL_ORIGIN	GOBP_RESPONSE_TO_MOLECULE_OF_BACTERIAL_ORIGIN		238	-0.512352	-1.82649	0	0.0235706	1	1976	tags=34%, list=17%, signal=40%
SOBOLEV_T_CELL_PANDEMRIX_AGE_18_64YO_7DY_DN	SOBOLEV_T_CELL_PANDEMRIX_AGE_18_64YO_7DY_DN		21	-0.725353	-1.82613	0.00162338	0.0236208	1	1127	tags=38%, list=10%, signal=42%
GSE11057_NAIVE_VS_EFF_MEMORY_CD4_TCELL_DN	GSE11057_NAIVE_VS_EFF_MEMORY_CD4_TCELL_DN		167	-0.53303	-1.82611	0	0.0235815	1	2204	tags=42%, list=19%, signal=51%
GOBP_PROTEIN_KINASE_B_SIGNALING	GOBP_PROTEIN_KINASE_B_SIGNALING		185	-0.521583	-1.82491	0	0.0238948	1	1577	tags=31%, list=13%, signal=36%
GSE13485_CTRL_VS_DAY3_YF17D_VACCINE_PBMC_DN	GSE13485_CTRL_VS_DAY3_YF17D_VACCINE_PBMC_DN		151	-0.521404	-1.82432	0	0.0240334	1	2175	tags=40%, list=18%, signal=49%
GOBP_AMINO_ACID_IMPORT	GOBP_AMINO_ACID_IMPORT		31	-0.667899	-1.82414	0.00497512	0.0240566	1	1924	tags=61%, list=16%, signal=73%
GSE24634_TREG_VS_TCONV_POST_DAY3_IL4_CONVERSION_DN	GSE24634_TREG_VS_TCONV_POST_DAY3_IL4_CONVERSION_DN		171	-0.527605	-1.82395	0	0.0240798	1	2081	tags=40%, list=18%, signal=48%
GOBP_LEUKOCYTE_MEDIATED_CYTOTOXICITY	GOBP_LEUKOCYTE_MEDIATED_CYTOTOXICITY		67	-0.59258	-1.82326	0	0.024217	1	1266	tags=31%, list=11%, signal=35%
GSE17974_IL4_AND_ANTI_IL12_VS_UNTREATED_2H_ACT_CD4_TCELL_DN	GSE17974_IL4_AND_ANTI_IL12_VS_UNTREATED_2H_ACT_CD4_TCELL_DN		116	-0.542106	-1.82307	0	0.0242327	1	1829	tags=33%, list=15%, signal=38%
GOBP_T_CELL_MEDIATED_IMMUNITY	GOBP_T_CELL_MEDIATED_IMMUNITY		70	-0.597421	-1.82183	0.00137174	0.0245707	1	1552	tags=37%, list=13%, signal=43%
GOMF_LIPASE_ACTIVITY	GOMF_LIPASE_ACTIVITY		80	-0.582157	-1.82148	0	0.0246365	1	1441	tags=28%, list=12%, signal=31%
GOBP_T_CELL_PROLIFERATION	GOBP_T_CELL_PROLIFERATION		143	-0.535135	-1.82138	0	0.0246051	1	2196	tags=42%, list=19%, signal=51%
GSE21670_UNTREATED_VS_IL6_TREATED_STAT3_KO_CD4_TCELL_UP	GSE21670_UNTREATED_VS_IL6_TREATED_STAT3_KO_CD4_TCELL_UP		175	-0.519248	-1.82123	0	0.0246291	1	2264	tags=40%, list=19%, signal=49%
KEGG_TYPE_I_DIABETES_MELLITUS	KEGG_TYPE_I_DIABETES_MELLITUS		22	-0.711619	-1.82084	0	0.0247199	1	1720	tags=50%, list=15%, signal=58%
GOBP_REGULATION_OF_RESPONSE_TO_WOUNDING	GOBP_REGULATION_OF_RESPONSE_TO_WOUNDING		110	-0.549169	-1.82066	0	0.0247251	1	2017	tags=43%, list=17%, signal=51%
GSE46606_UNSTIM_VS_CD40L_IL2_IL5_1DAY_STIMULATED_IRF4HIGH_SORTED_BCELL_DN	GSE46606_UNSTIM_VS_CD40L_IL2_IL5_1DAY_STIMULATED_IRF4HIGH_SORTED_BCELL_DN		163	-0.528761	-1.82002	0	0.0248518	1	2434	tags=42%, list=21%, signal=52%
GOBP_NEGATIVE_REGULATION_OF_RESPONSE_TO_BIOTIC_STIMULUS	GOBP_NEGATIVE_REGULATION_OF_RESPONSE_TO_BIOTIC_STIMULUS		69	-0.582615	-1.81981	0.00144718	0.0248774	1	2552	tags=49%, list=22%, signal=62%
HP_ECCHYMOSIS	HP_ECCHYMOSIS		34	-0.653798	-1.81841	0.00638978	0.0252425	1	2580	tags=56%, list=22%, signal=71%
GOBP_REGULATION_OF_T_CELL_MEDIATED_IMMUNITY	GOBP_REGULATION_OF_T_CELL_MEDIATED_IMMUNITY		53	-0.614348	-1.81805	0.00291545	0.025322	1	1496	tags=38%, list=13%, signal=43%
GSE360_L_DONOVANI_VS_M_TUBERCULOSIS_MAC_DN	GSE360_L_DONOVANI_VS_M_TUBERCULOSIS_MAC_DN		145	-0.530915	-1.81802	0	0.0252852	1	1763	tags=33%, list=15%, signal=38%
GSE21670_UNTREATED_VS_TGFB_TREATED_CD4_TCELL_UP	GSE21670_UNTREATED_VS_TGFB_TREATED_CD4_TCELL_UP		98	-0.55763	-1.81771	0	0.025312	1	1930	tags=34%, list=16%, signal=40%
GOBP_REGULATION_OF_TOLL_LIKE_RECEPTOR_4_SIGNALING_PATHWAY	GOBP_REGULATION_OF_TOLL_LIKE_RECEPTOR_4_SIGNALING_PATHWAY		17	-0.743814	-1.81756	0.00172117	0.0253025	1	1097	tags=35%, list=9%, signal=39%
GSE39916_B_CELL_SPLEEN_VS_PLASMA_CELL_BONE_MARROW_DN	GSE39916_B_CELL_SPLEEN_VS_PLASMA_CELL_BONE_MARROW_DN		155	-0.531792	-1.81678	0	0.0255229	1	1899	tags=37%, list=16%, signal=44%
GOBP_IMPORT_INTO_CELL	GOBP_IMPORT_INTO_CELL		131	-0.528585	-1.81656	0	0.0255602	1	1774	tags=34%, list=15%, signal=39%
GOBP_IRON_ION_TRANSMEMBRANE_TRANSPORT	GOBP_IRON_ION_TRANSMEMBRANE_TRANSPORT		15	-0.776983	-1.81646	0.00680272	0.0255479	1	229	tags=27%, list=2%, signal=27%
KEGG_PRION_DISEASES	KEGG_PRION_DISEASES		27	-0.689529	-1.8163	0.00492611	0.0255603	1	2570	tags=59%, list=22%, signal=76%
GOMF_HEPARIN_BINDING	GOMF_HEPARIN_BINDING		104	-0.557909	-1.81584	0	0.0256689	1	1530	tags=35%, list=13%, signal=39%
GOBP_BIOLOGICAL_PROCESS_INVOLVED_IN_INTERACTION_WITH_HOST	GOBP_BIOLOGICAL_PROCESS_INVOLVED_IN_INTERACTION_WITH_HOST		164	-0.518324	-1.81551	0	0.0257457	1	1858	tags=31%, list=16%, signal=36%
GSE15733_BM_VS_SPLEEN_MEMORY_CD4_TCELL_UP	GSE15733_BM_VS_SPLEEN_MEMORY_CD4_TCELL_UP		135	-0.526931	-1.81525	0	0.0257691	1	1912	tags=36%, list=16%, signal=42%
GSE13547_CTRL_VS_ANTI_IGM_STIM_BCELL_2H_UP	GSE13547_CTRL_VS_ANTI_IGM_STIM_BCELL_2H_UP		160	-0.523563	-1.81484	0	0.0258788	1	1252	tags=24%, list=11%, signal=26%
GOBP_REGULATORY_T_CELL_DIFFERENTIATION	GOBP_REGULATORY_T_CELL_DIFFERENTIATION		25	-0.692806	-1.8145	0.00498339	0.0259349	1	1687	tags=48%, list=14%, signal=56%
GSE22886_NAIVE_CD4_TCELL_VS_MONOCYTE_UP	GSE22886_NAIVE_CD4_TCELL_VS_MONOCYTE_UP		158	-0.526936	-1.81413	0	0.0260041	1	1782	tags=34%, list=15%, signal=39%
GOBP_POSITIVE_REGULATION_OF_CELL_CELL_ADHESION	GOBP_POSITIVE_REGULATION_OF_CELL_CELL_ADHESION		214	-0.509895	-1.81334	0	0.0262014	1	2084	tags=37%, list=18%, signal=45%
GOBP_POSITIVE_REGULATION_OF_HEMOPOIESIS	GOBP_POSITIVE_REGULATION_OF_HEMOPOIESIS		122	-0.544003	-1.81298	0	0.026241	1	1588	tags=32%, list=13%, signal=37%
GOBP_REGULATION_OF_T_CELL_DIFFERENTIATION_IN_THYMUS	GOBP_REGULATION_OF_T_CELL_DIFFERENTIATION_IN_THYMUS		19	-0.723291	-1.8116	0.00816993	0.0265818	1	659	tags=32%, list=6%, signal=33%
GSE6259_33D1_POS_VS_DEC205_POS_SPLENIC_DC_DN	GSE6259_33D1_POS_VS_DEC205_POS_SPLENIC_DC_DN		163	-0.523941	-1.8113	0	0.0266315	1	2385	tags=38%, list=20%, signal=47%
GSE42021_CD24HI_VS_CD24LOW_TCONV_THYMUS_DN	GSE42021_CD24HI_VS_CD24LOW_TCONV_THYMUS_DN		153	-0.52195	-1.81109	0	0.0266414	1	2337	tags=39%, list=20%, signal=48%
GSE2585_CTEC_VS_MTEC_THYMUS_DN	GSE2585_CTEC_VS_MTEC_THYMUS_DN		136	-0.52909	-1.81065	0.00130719	0.0267172	1	1405	tags=29%, list=12%, signal=32%
GOBP_POSITIVE_REGULATION_OF_EPITHELIAL_CELL_PROLIFERATION	GOBP_POSITIVE_REGULATION_OF_EPITHELIAL_CELL_PROLIFERATION		133	-0.535653	-1.8103	0	0.0268012	1	2103	tags=37%, list=18%, signal=44%
HP_VASCULITIS	HP_VASCULITIS		49	-0.619811	-1.80918	0.00310559	0.0271052	1	2565	tags=53%, list=22%, signal=67%
GSE43863_DAY6_EFF_VS_DAY150_MEM_TH1_CD4_TCELL_UP	GSE43863_DAY6_EFF_VS_DAY150_MEM_TH1_CD4_TCELL_UP		174	-0.520003	-1.80917	0	0.0270511	1	2458	tags=48%, list=21%, signal=59%
GSE12505_WT_VS_E2_2_HET_PDC_UP	GSE12505_WT_VS_E2_2_HET_PDC_UP		83	-0.566811	-1.80915	0	0.0270038	1	2163	tags=36%, list=18%, signal=44%
KRAS.KIDNEY_UP.V1_DN	KRAS.KIDNEY_UP.V1_DN		54	-0.607587	-1.80896	0.00144718	0.0270282	1	1530	tags=43%, list=13%, signal=49%
GOBP_POSITIVE_REGULATION_OF_PEPTIDYL_TYROSINE_PHOSPHORYLATION	GOBP_POSITIVE_REGULATION_OF_PEPTIDYL_TYROSINE_PHOSPHORYLATION		132	-0.530395	-1.80895	0	0.0269767	1	1954	tags=37%, list=17%, signal=44%
GSE7852_THYMUS_VS_FAT_TCONV_DN	GSE7852_THYMUS_VS_FAT_TCONV_DN		166	-0.527148	-1.80882	0	0.0269621	1	2251	tags=42%, list=19%, signal=51%
GOBP_BONE_REMODELING	GOBP_BONE_REMODELING		65	-0.578979	-1.8087	0.00291545	0.0269347	1	1428	tags=35%, list=12%, signal=40%
GSE43863_TFH_VS_LY6C_LOW_CXCR5NEG_EFFECTOR_CD4_TCELL_DN	GSE43863_TFH_VS_LY6C_LOW_CXCR5NEG_EFFECTOR_CD4_TCELL_DN		144	-0.530994	-1.80837	0	0.0269826	1	2035	tags=44%, list=17%, signal=53%
HP_TETRAPLEGIA	HP_TETRAPLEGIA		21	-0.723872	-1.80773	0	0.0271418	1	1008	tags=19%, list=9%, signal=21%
GSE25088_CTRL_VS_IL4_STIM_STAT6_KO_MACROPHAGE_UP	GSE25088_CTRL_VS_IL4_STIM_STAT6_KO_MACROPHAGE_UP		117	-0.536424	-1.80771	0.00131062	0.0270906	1	1784	tags=32%, list=15%, signal=38%
GOBP_POSITIVE_REGULATION_OF_PRODUCTION_OF_MOLECULAR_MEDIATOR_OF_IMMUNE_RESPONSE	GOBP_POSITIVE_REGULATION_OF_PRODUCTION_OF_MOLECULAR_MEDIATOR_OF_IMMUNE_RESPONSE		77	-0.573937	-1.80767	0	0.0270439	1	1810	tags=40%, list=15%, signal=47%
GSE10325_MYELOID_VS_LUPUS_MYELOID_DN	GSE10325_MYELOID_VS_LUPUS_MYELOID_DN		167	-0.519189	-1.8071	0	0.0271424	1	2485	tags=44%, list=21%, signal=55%
GSE9006_HEALTHY_VS_TYPE_1_DIABETES_PBMC_AT_DX_DN	GSE9006_HEALTHY_VS_TYPE_1_DIABETES_PBMC_AT_DX_DN		149	-0.532847	-1.80685	0	0.0271574	1	1714	tags=28%, list=15%, signal=33%
GOMF_G_PROTEIN_COUPLED_CHEMOATTRACTANT_RECEPTOR_ACTIVITY	GOMF_G_PROTEIN_COUPLED_CHEMOATTRACTANT_RECEPTOR_ACTIVITY		20	-0.718066	-1.80679	0.00332226	0.0271256	1	862	tags=50%, list=7%, signal=54%
GOBP_POSITIVE_CHEMOTAXIS	GOBP_POSITIVE_CHEMOTAXIS		44	-0.628189	-1.80674	0.00304878	0.0270876	1	1825	tags=43%, list=15%, signal=51%
GOBP_NEURAL_RETINA_DEVELOPMENT	GOBP_NEURAL_RETINA_DEVELOPMENT		39	-0.635615	-1.80661	0.00153846	0.0270901	1	488	tags=13%, list=4%, signal=13%
GOBP_INTERLEUKIN_8_PRODUCTION	GOBP_INTERLEUKIN_8_PRODUCTION		64	-0.589451	-1.80585	0.00145349	0.0272594	1	2022	tags=44%, list=17%, signal=52%
PATEL_SKIN_OF_BODY_ZOSTAVAX_AGE_70_93YO_VZV_CHALLENGED_POST_VACCINATION_VS_UNCHALLENGED_72HR_TOP_30_DEG_UP	PATEL_SKIN_OF_BODY_ZOSTAVAX_AGE_70_93YO_VZV_CHALLENGED_POST_VACCINATION_VS_UNCHALLENGED_72HR_TOP_30_DEG_UP		15	-0.767599	-1.80579	0.00338409	0.0272173	1	1051	tags=73%, list=9%, signal=80%
GOCC_IMMUNOLOGICAL_SYNAPSE	GOCC_IMMUNOLOGICAL_SYNAPSE		36	-0.649136	-1.80561	0.00153846	0.0272237	1	1783	tags=44%, list=15%, signal=52%
GOBP_REGULATION_OF_PHOSPHATIDYLINOSITOL_3_KINASE_ACTIVITY	GOBP_REGULATION_OF_PHOSPHATIDYLINOSITOL_3_KINASE_ACTIVITY		46	-0.622625	-1.80514	0	0.0273434	1	2117	tags=48%, list=18%, signal=58%
GOBP_G_PROTEIN_COUPLED_RECEPTOR_SIGNALING_PATHWAY_COUPLED_TO_CYCLIC_NUCLEOTIDE_SECOND_MESSENGER	GOBP_G_PROTEIN_COUPLED_RECEPTOR_SIGNALING_PATHWAY_COUPLED_TO_CYCLIC_NUCLEOTIDE_SECOND_MESSENGER		19	-0.733786	-1.8048	0.00499168	0.0274103	1	1066	tags=53%, list=9%, signal=58%
HP_HEMIPLEGIA	HP_HEMIPLEGIA		24	-0.712503	-1.8045	0.00167504	0.0274725	1	1984	tags=54%, list=17%, signal=65%
GOBP_SEGMENTATION	GOBP_SEGMENTATION		63	-0.58665	-1.80322	0.0014881	0.0278563	1	1530	tags=30%, list=13%, signal=34%
GOBP_METAL_ION_HOMEOSTASIS	GOBP_METAL_ION_HOMEOSTASIS		400	-0.48289	-1.80216	0	0.0281884	1	1637	tags=27%, list=14%, signal=30%
GSE41867_DAY6_VS_DAY15_LCMV_ARMSTRONG_EFFECTOR_CD8_TCELL_UP	GSE41867_DAY6_VS_DAY15_LCMV_ARMSTRONG_EFFECTOR_CD8_TCELL_UP		116	-0.54075	-1.80136	0	0.0283969	1	2496	tags=49%, list=21%, signal=62%
GOBP_GLIOGENESIS	GOBP_GLIOGENESIS		197	-0.510934	-1.80123	0	0.0284009	1	1526	tags=27%, list=13%, signal=31%
GOBP_REGULATION_OF_RESPONSE_TO_BIOTIC_STIMULUS	GOBP_REGULATION_OF_RESPONSE_TO_BIOTIC_STIMULUS		291	-0.493921	-1.80074	0	0.028527	1	1891	tags=26%, list=16%, signal=30%
GSE1432_CTRL_VS_IFNG_24H_MICROGLIA_DN	GSE1432_CTRL_VS_IFNG_24H_MICROGLIA_DN		154	-0.523239	-1.79941	0	0.0289011	1	2230	tags=38%, list=19%, signal=47%
GOBP_CELL_COMMUNICATION_BY_ELECTRICAL_COUPLING	GOBP_CELL_COMMUNICATION_BY_ELECTRICAL_COUPLING		24	-0.69365	-1.79931	0.00326797	0.0288814	1	1939	tags=46%, list=16%, signal=55%
GSE22886_NAIVE_BCELL_VS_DC_DN	GSE22886_NAIVE_BCELL_VS_DC_DN		180	-0.507036	-1.79851	0	0.0291089	1	3410	tags=49%, list=29%, signal=68%
GOBP_REGULATION_OF_PEPTIDYL_TYROSINE_PHOSPHORYLATION	GOBP_REGULATION_OF_PEPTIDYL_TYROSINE_PHOSPHORYLATION		185	-0.511386	-1.79791	0	0.0292698	1	2077	tags=36%, list=18%, signal=43%
GSE20366_TREG_VS_NAIVE_CD4_TCELL_DN	GSE20366_TREG_VS_NAIVE_CD4_TCELL_DN		141	-0.526935	-1.79773	0.00126103	0.0292763	1	1414	tags=28%, list=12%, signal=31%
HP_MACULAR_PURPURA	HP_MACULAR_PURPURA		47	-0.62131	-1.79723	0.00468019	0.0293769	1	2580	tags=53%, list=22%, signal=68%
GOMF_CHEMOKINE_BINDING	GOMF_CHEMOKINE_BINDING		27	-0.684179	-1.7969	0.00481541	0.029465	1	1862	tags=59%, list=16%, signal=70%
GSE6259_FLT3L_INDUCED_VS_WT_SPLENIC_DC_33D1_POS_DN	GSE6259_FLT3L_INDUCED_VS_WT_SPLENIC_DC_33D1_POS_DN		116	-0.54162	-1.79681	0.00131234	0.0294485	1	2385	tags=45%, list=20%, signal=56%
GOBP_RESPONSE_TO_VIRUS	GOBP_RESPONSE_TO_VIRUS		249	-0.490624	-1.7968	0	0.0294036	1	2471	tags=36%, list=21%, signal=44%
GOBP_REGULATION_OF_GLIOGENESIS	GOBP_REGULATION_OF_GLIOGENESIS		60	-0.583745	-1.79651	0.002886	0.0294586	1	1457	tags=32%, list=12%, signal=36%
GSE44649_WT_VS_MIR155_KO_NAIVE_CD8_TCELL_DN	GSE44649_WT_VS_MIR155_KO_NAIVE_CD8_TCELL_DN		159	-0.513196	-1.79567	0	0.0297022	1	2284	tags=37%, list=19%, signal=45%
GOBP_POSITIVE_REGULATION_OF_NATURAL_KILLER_CELL_MEDIATED_IMMUNITY	GOBP_POSITIVE_REGULATION_OF_NATURAL_KILLER_CELL_MEDIATED_IMMUNITY		20	-0.716023	-1.79564	0.0131363	0.0296571	1	1821	tags=60%, list=15%, signal=71%
GSE7460_TCONV_VS_TREG_THYMUS_DN	GSE7460_TCONV_VS_TREG_THYMUS_DN		161	-0.511082	-1.79511	0	0.0298304	1	2074	tags=41%, list=18%, signal=49%
GOCC_MEMBRANE_MICRODOMAIN	GOCC_MEMBRANE_MICRODOMAIN		242	-0.500681	-1.79463	0	0.029973	1	2166	tags=36%, list=18%, signal=43%
GOBP_REGULATION_OF_T_HELPER_1_TYPE_IMMUNE_RESPONSE	GOBP_REGULATION_OF_T_HELPER_1_TYPE_IMMUNE_RESPONSE		24	-0.696816	-1.79442	0.00484653	0.0300163	1	1711	tags=63%, list=14%, signal=73%
GSE360_L_MAJOR_VS_B_MALAYI_HIGH_DOSE_DC_UP	GSE360_L_MAJOR_VS_B_MALAYI_HIGH_DOSE_DC_UP		149	-0.524832	-1.79327	0	0.0304295	1	1472	tags=28%, list=12%, signal=31%
KEGG_COMPLEMENT_AND_COAGULATION_CASCADES	KEGG_COMPLEMENT_AND_COAGULATION_CASCADES		35	-0.653755	-1.79148	0.0030722	0.0310296	1	2659	tags=66%, list=23%, signal=85%
GOBP_RESPONSE_TO_TUMOR_CELL	GOBP_RESPONSE_TO_TUMOR_CELL		17	-0.745421	-1.79126	0.00344234	0.0310386	1	1706	tags=59%, list=14%, signal=69%
GSE42724_NAIVE_BCELL_VS_PLASMABLAST_UP	GSE42724_NAIVE_BCELL_VS_PLASMABLAST_UP		148	-0.531486	-1.79112	0	0.0310236	1	2469	tags=45%, list=21%, signal=57%
GOBP_POSITIVE_REGULATION_OF_VASOCONSTRICTION	GOBP_POSITIVE_REGULATION_OF_VASOCONSTRICTION		16	-0.752265	-1.79111	0.00357782	0.0309767	1	1020	tags=69%, list=9%, signal=75%
GSE8384_CTRL_VS_B_ABORTUS_4H_MAC_CELL_LINE_DN	GSE8384_CTRL_VS_B_ABORTUS_4H_MAC_CELL_LINE_DN		176	-0.508126	-1.7907	0	0.0310815	1	1892	tags=30%, list=16%, signal=35%
GSE22886_TH1_VS_TH2_48H_ACT_UP	GSE22886_TH1_VS_TH2_48H_ACT_UP		124	-0.534889	-1.79037	0	0.0311401	1	1411	tags=27%, list=12%, signal=31%
GOBP_POSITIVE_REGULATION_OF_OSTEOBLAST_DIFFERENTIATION	GOBP_POSITIVE_REGULATION_OF_OSTEOBLAST_DIFFERENTIATION		47	-0.62457	-1.78885	0.00149031	0.0316748	1	2514	tags=51%, list=21%, signal=65%
GSE36527_CD69_NEG_VS_POS_TREG_CD62L_LOS_KLRG1_NEG_UP	GSE36527_CD69_NEG_VS_POS_TREG_CD62L_LOS_KLRG1_NEG_UP		148	-0.519621	-1.78852	0.001287	0.031742	1	2469	tags=44%, list=21%, signal=55%
GOBP_EMBRYONIC_PATTERN_SPECIFICATION	GOBP_EMBRYONIC_PATTERN_SPECIFICATION		36	-0.648263	-1.78834	0.00322581	0.0317655	1	1689	tags=36%, list=14%, signal=42%
KEGG_ANTIGEN_PROCESSING_AND_PRESENTATION	KEGG_ANTIGEN_PROCESSING_AND_PRESENTATION		36	-0.650836	-1.78823	0.00629921	0.0317375	1	1824	tags=36%, list=15%, signal=43%
GOBP_REGULATION_OF_INFLAMMATORY_RESPONSE	GOBP_REGULATION_OF_INFLAMMATORY_RESPONSE		236	-0.498877	-1.78744	0	0.0319503	1	1716	tags=31%, list=15%, signal=35%
GSE43863_NAIVE_VS_TH1_EFF_CD4_TCELL_D6_LCMV_DN	GSE43863_NAIVE_VS_TH1_EFF_CD4_TCELL_D6_LCMV_DN		83	-0.572725	-1.78741	0.0014245	0.0319143	1	1668	tags=30%, list=14%, signal=35%
GOBP_VASCULAR_PROCESS_IN_CIRCULATORY_SYSTEM	GOBP_VASCULAR_PROCESS_IN_CIRCULATORY_SYSTEM		157	-0.522335	-1.78732	0.00126904	0.0318922	1	1634	tags=35%, list=14%, signal=40%
GOBP_REGULATION_OF_WOUND_HEALING	GOBP_REGULATION_OF_WOUND_HEALING		85	-0.569202	-1.78663	0	0.0320915	1	1919	tags=44%, list=16%, signal=52%
GSE38681_WT_VS_LYL1_KO_LYMPHOID_PRIMED_MULTIPOTENT_PROGENITOR_DN	GSE38681_WT_VS_LYL1_KO_LYMPHOID_PRIMED_MULTIPOTENT_PROGENITOR_DN		166	-0.515316	-1.78642	0	0.0321319	1	2508	tags=42%, list=21%, signal=53%
GOBP_NEGATIVE_REGULATION_OF_NOTCH_SIGNALING_PATHWAY	GOBP_NEGATIVE_REGULATION_OF_NOTCH_SIGNALING_PATHWAY		33	-0.644031	-1.78618	0.00940439	0.0321779	1	1437	tags=30%, list=12%, signal=34%
GOBP_PEPTIDYL_TYROSINE_MODIFICATION	GOBP_PEPTIDYL_TYROSINE_MODIFICATION		277	-0.491645	-1.7858	0	0.0322588	1	2130	tags=35%, list=18%, signal=42%
GSE22935_WT_VS_MYD88_KO_MACROPHAGE_UP	GSE22935_WT_VS_MYD88_KO_MACROPHAGE_UP		173	-0.508354	-1.78509	0	0.0324815	1	2583	tags=44%, list=22%, signal=55%
GSE30971_WBP7_HET_VS_KO_MACROPHAGE_DN	GSE30971_WBP7_HET_VS_KO_MACROPHAGE_DN		146	-0.524264	-1.78457	0	0.032651	1	2207	tags=40%, list=19%, signal=49%
GSE45739_UNSTIM_VS_ACD3_ACD28_STIM_WT_CD4_TCELL_DN	GSE45739_UNSTIM_VS_ACD3_ACD28_STIM_WT_CD4_TCELL_DN		169	-0.513205	-1.78433	0	0.0326782	1	1552	tags=28%, list=13%, signal=32%
JNK_DN.V1_DN	JNK_DN.V1_DN		113	-0.536013	-1.78333	0	0.0330208	1	2479	tags=46%, list=21%, signal=58%
[truncated: 9,112 more rows]
