# Supplementary material for: The genomic landscape of canine diffuse large B-cell lymphoma identifies distinct subtypes with clinical and therapeutic implications
Source: Research Square preprint supplement (doi:10.21203/rs.3.rs-916612/v1), 2021-09-21
Supplement: Supplementary file 8 [file 8142f175d5e9fe7d863f17fc.xlsx]

## Sheet: Foglio1
Supplementary Data 11: Somatic mutations identified by WGS in 10 cDLBCLs classified as "bad" and "good" responders.
# Sample ID	Group	Variant Type	Annotation	Ensembl Gene ID	Dog gene name	Human gene name	Chromosome	Start	Stop	REF	ALT	Genotype	REF allele depth, ALT allele depth	ALT allele frequency	Depth
2	bad responder	intergenic	ENSCAFG00000047846.1(dist=18951),ENSCAFG00000027476.1(dist=2539)	ENSCAFG00000047846	-	-	chr1	2607542	2607542	A	G	0|1	28,5	0.167	33
2	bad responder	intergenic	ENSCAFG00000047846.1(dist=18952),ENSCAFG00000027476.1(dist=2538)	ENSCAFG00000047846	-	-	chr1	2607543	2607543	C	T	0|1	28,5	0.167	33
2	bad responder	intergenic	ENSCAFG00000027476.1(dist=116718),ENSCAFG00000000015.4(dist=2399)	ENSCAFG00000027476	-	-	chr1	2726932	2726932	T	C	0|1	25,5	0.173	30
2	bad responder	intergenic	ENSCAFG00000027476.1(dist=116719),ENSCAFG00000000015.4(dist=2398)	ENSCAFG00000027476	-	-	chr1	2726933	2726933	G	A	0|1	25,5	0.174	30
2	bad responder	upstream	ENSCAFG00000045885.1	ENSCAFG00000045885	-	-	chr1	2798053	2798053	A	G	0/1	20,3	0.187	23
2	bad responder	intronic	ENSCAFG00000000019.5	ENSCAFG00000000019	ZNF516	ZNF516	chr1	3395291	3395291	A	T	0/1	18,3	0.159	21
2	bad responder	intergenic	ENSCAFG00000047305.1(dist=22433),ENSCAFG00000047639.1(dist=163801)	ENSCAFG00000047305	-	-	chr1	3948184	3948184	C	T	0/1	20,13	0.4	33
2	bad responder	intergenic	ENSCAFG00000000020.4(dist=13859),ENSCAFG00000000021.4(dist=43301)	ENSCAFG00000000020	-	-	chr1	4260621	4260621	C	T	0|1	36,2	0.115	38
2	bad responder	intergenic	ENSCAFG00000000020.4(dist=13860),ENSCAFG00000000021.4(dist=43300)	ENSCAFG00000000020	-	-	chr1	4260622	4260622	A	G	0|1	36,2	0.115	38
2	bad responder	intronic	ENSCAFG00000000024.4	ENSCAFG00000000024	CNDP1	CNDP1	chr1	4905405	4905405	T	C	0/1	20,3	0.167	23
2	bad responder	intergenic	ENSCAFG00000023363.3(dist=24495),ENSCAFG00000000025.4(dist=5942)	ENSCAFG00000023363	-	-	chr1	4953944	4953944	C	G	0|1	25,4	0.142	29
2	bad responder	intergenic	ENSCAFG00000030462.2(dist=15921),ENSCAFG00000049021.1(dist=13493)	ENSCAFG00000030462	-	-	chr1	5001592	5001592	C	A	0|1	29,2	0.119	31
2	bad responder	intergenic	ENSCAFG00000030462.2(dist=15926),ENSCAFG00000049021.1(dist=13488)	ENSCAFG00000030462	-	-	chr1	5001597	5001597	T	G	0|1	30,2	0.12	32
2	bad responder	intergenic	ENSCAFG00000039235.2(dist=1237),ENSCAFG00000000027.4(dist=5251)	ENSCAFG00000039235	-	-	chr1	5150106	5150106	T	C	0/1	27,3	0.13	30
2	bad responder	intergenic	ENSCAFG00000047479.1(dist=78249),ENSCAFG00000000031.4(dist=387263)	ENSCAFG00000047479	-	-	chr1	5726804	5726804	T	C	0/1	20,3	0.176	23
2	bad responder	intergenic	ENSCAFG00000047479.1(dist=139792),ENSCAFG00000000031.4(dist=325720)	ENSCAFG00000047479	-	-	chr1	5788347	5788347	G	A	0/1	6,16	0.625	22
2	bad responder	intergenic	ENSCAFG00000000032.4(dist=324226),ENSCAFG00000000034.3(dist=166455)	ENSCAFG00000000032	-	-	chr1	6706250	6706250	T	G	0/1	15,5	0.267	20
2	bad responder	intergenic	ENSCAFG00000000032.4(dist=421134),ENSCAFG00000000034.3(dist=69547)	ENSCAFG00000000032	-	-	chr1	6803158	6803158	T	C	0/1	28,3	0.129	31
2	bad responder	intergenic	ENSCAFG00000000034.3(dist=158642),ENSCAFG00000042806.1(dist=696326)	ENSCAFG00000000034	-	-	chr1	7032599	7032599	G	A	0/1	11,18	0.619	29
2	bad responder	ncRNA_intronic	ENSCAFG00000049555.1	ENSCAFG00000049555	-	-	chr1	7972098	7972098	G	A	0/1	8,9	0.5	17
2	bad responder	intronic	ENSCAFG00000000037.4	ENSCAFG00000000037	RTTN	RTTN	chr1	8313196	8313196	A	G	0|1	22,3	0.2	25
2	bad responder	intronic	ENSCAFG00000000037.4	ENSCAFG00000000037	RTTN	RTTN	chr1	8313199	8313199	C	T	0|1	22,3	0.2	25
2	bad responder	intronic	ENSCAFG00000000039.4	ENSCAFG00000000039	DOK6	DOK6	chr1	8469233	8469233	G	A	0/1	19,3	0.158	22
2	bad responder	intergenic	ENSCAFG00000000044.4(dist=40033),ENSCAFG00000000047.4(dist=257069)	ENSCAFG00000000044	-	-	chr1	10086778	10086778	A	C	0|1	26,4	0.167	30
2	bad responder	intergenic	ENSCAFG00000000044.4(dist=40036),ENSCAFG00000000047.4(dist=257066)	ENSCAFG00000000044	-	-	chr1	10086781	10086781	G	T	0|1	26,4	0.166	30
2	bad responder	intergenic	ENSCAFG00000049554.1(dist=200144),ENSCAFG00000000056.4(dist=22993)	ENSCAFG00000049554	-	-	chr1	11683680	11683680	C	G	0/1	13,4	0.308	17
2	bad responder	intergenic	ENSCAFG00000000056.4(dist=385879),ENSCAFG00000042318.1(dist=507363)	ENSCAFG00000000056	-	-	chr1	12210457	12210457	A	G	0/1	21,6	0.239	27
2	bad responder	intergenic	ENSCAFG00000000056.4(dist=569159),ENSCAFG00000042318.1(dist=324083)	ENSCAFG00000000056	-	-	chr1	12393737	12393737	T	A	0/1	17,11	0.45	28
2	bad responder	intergenic	ENSCAFG00000000056.4(dist=730882),ENSCAFG00000042318.1(dist=162360)	ENSCAFG00000000056	-	-	chr1	12555460	12555460	T	A	0/1	18,3	0.187	21
2	bad responder	ncRNA_intronic	ENSCAFG00000042318.1	ENSCAFG00000042318	-	-	chr1	12762190	12762190	G	A	0/1	18,5	0.278	23
2	bad responder	intergenic	ENSCAFG00000000058.4(dist=1779),ENSCAFG00000023582.3(dist=9680)	ENSCAFG00000000058	-	-	chr1	13224722	13224722	G	A	0/1	19,4	0.175	23
2	bad responder	intergenic	ENSCAFG00000038998.2(dist=9567),ENSCAFG00000037703.2(dist=33984)	ENSCAFG00000038998	-	-	chr1	14430438	14430438	T	A	0/1	15,3	0.266	18
2	bad responder	intergenic	ENSCAFG00000042743.1(dist=45100),ENSCAFG00000049792.1(dist=21642)	ENSCAFG00000042743	-	-	chr1	15634973	15634973	T	A	0|1	24,6	0.208	30
2	bad responder	intergenic	ENSCAFG00000042743.1(dist=45101),ENSCAFG00000049792.1(dist=21641)	ENSCAFG00000042743	-	-	chr1	15634974	15634974	T	A	0|1	24,6	0.208	30
2	bad responder	intergenic	ENSCAFG00000000129.4(dist=80006),ENSCAFG00000000133.5(dist=170830)	ENSCAFG00000000129	-	-	chr1	18637899	18637899	G	A	0/1	10,12	0.529	22
2	bad responder	intergenic	ENSCAFG00000000129.4(dist=158727),ENSCAFG00000000133.5(dist=92109)	ENSCAFG00000000129	-	-	chr1	18716620	18716620	C	T	0|1	16,2	0.214	18
2	bad responder	intronic	ENSCAFG00000000137.5	ENSCAFG00000000137	TXNL1	TXNL1	chr1	19171976	19171976	C	A	0/1	11,6	0.4	17
2	bad responder	intergenic	ENSCAFG00000043239.1(dist=13385),ENSCAFG00000045662.1(dist=18288)	ENSCAFG00000043239	-	-	chr1	19345448	19345448	A	G	0/1	23,5	0.19	28
2	bad responder	intergenic	ENSCAFG00000047562.1(dist=183391),ENSCAFG00000038204.2(dist=126052)	ENSCAFG00000047562	-	-	chr1	19659521	19659521	A	T	0|1	43,2	0.088	45
2	bad responder	intergenic	ENSCAFG00000000140.5(dist=150936),ENSCAFG00000000144.5(dist=87906)	ENSCAFG00000000140	-	-	chr1	20568284	20568284	C	T	0/1	24,4	0.143	28
2	bad responder	intergenic	ENSCAFG00000000150.4(dist=26983),ENSCAFG00000032711.2(dist=21037)	ENSCAFG00000000150	-	-	chr1	21214930	21214930	C	G	0/1	13,13	0.438	26
2	bad responder	intergenic	ENSCAFG00000032711.2(dist=9925),ENSCAFG00000041012.1(dist=2165)	ENSCAFG00000032711	-	-	chr1	21293271	21293271	A	G	0/1	26,3	0.13	29
2	bad responder	intronic	ENSCAFG00000000157.5	ENSCAFG00000000157	DCC	DCC	chr1	21822358	21822358	G	C	0|1	33,2	0.12	35
2	bad responder	intronic	ENSCAFG00000000157.5	ENSCAFG00000000157	DCC	DCC	chr1	21822363	21822363	G	C	0|1	32,2	0.115	34
2	bad responder	intronic	ENSCAFG00000000157.5	ENSCAFG00000000157	DCC	DCC	chr1	21923982	21923982	T	-	0/1	16,8	0.352	24
2	bad responder	ncRNA_intronic	ENSCAFG00000046956.1	ENSCAFG00000046956	-	-	chr1	23061071	23061071	A	C	0/1	23,3	0.143	26
2	bad responder	intronic	ENSCAFG00000031536.2	ENSCAFG00000031536	LDLRAD4	LDLRAD4	chr1	24581749	24581749	C	A	0|1	21,2	0.118	23
2	bad responder	intronic	ENSCAFG00000031536.2	ENSCAFG00000031536	LDLRAD4	LDLRAD4	chr1	24581754	24581754	T	G	0|1	22,2	0.111	24
2	bad responder	intronic	ENSCAFG00000031536.2	ENSCAFG00000031536	LDLRAD4	LDLRAD4	chr1	24845810	24845810	A	G	0/1	14,3	0.229	17
2	bad responder	intergenic	ENSCAFG00000000185.4(dist=59604),ENSCAFG00000023591.4(dist=11207)	ENSCAFG00000000185	-	-	chr1	25666835	25666835	G	A	0/1	8,5	0.399	13
2	bad responder	intergenic	ENSCAFG00000028024.1(dist=14570),ENSCAFG00000042249.1(dist=18155)	ENSCAFG00000028024	-	-	chr1	25858588	25858588	C	G	0|1	11,2	0.25	13
2	bad responder	ncRNA_intronic	ENSCAFG00000048211.1	ENSCAFG00000048211	-	-	chr1	26190710	26190710	A	C	0|1	33,4	0.148	37
2	bad responder	ncRNA_intronic	ENSCAFG00000048211.1	ENSCAFG00000048211	-	-	chr1	26190715	26190715	G	T	0|1	33,4	0.148	37
2	bad responder	intronic	ENSCAFG00000000239.4	ENSCAFG00000000239	PDE7B	PDE7B	chr1	28656773	28656773	G	T	0|1	26,2	0.125	28
2	bad responder	intronic	ENSCAFG00000000239.4	ENSCAFG00000000239	PDE7B	PDE7B	chr1	28656776	28656776	A	C	0|1	26,2	0.124	28
2	bad responder	intronic	ENSCAFG00000000239.4	ENSCAFG00000000239	PDE7B	PDE7B	chr1	28699476	28699476	A	G	0/1	24,3	0.136	27
2	bad responder	intergenic	ENSCAFG00000000257.4(dist=29002),ENSCAFG00000000258.5(dist=36714)	ENSCAFG00000000257	-	-	chr1	29575008	29575008	T	C	0|1	18,4	0.176	22
2	bad responder	intronic	ENSCAFG00000000260.4	ENSCAFG00000000260	IFNGR1	IFNGR1	chr1	29661579	29661579	A	T	0/1	10,10	0.5	20
2	bad responder	intergenic	ENSCAFG00000000279.5(dist=25332),ENSCAFG00000000281.4(dist=47677)	ENSCAFG00000000279	-	-	chr1	31206874	31206874	A	C	0|1	17,2	0.167	19
2	bad responder	intergenic	ENSCAFG00000000279.5(dist=25337),ENSCAFG00000000281.4(dist=47672)	ENSCAFG00000000279	-	-	chr1	31206879	31206879	G	T	0|1	18,2	0.167	20
2	bad responder	ncRNA_intronic	ENSCAFG00000035645.2	ENSCAFG00000035645	-	-	chr1	31588641	31588641	A	G	0|1	22,3	0.221	25
2	bad responder	ncRNA_intronic	ENSCAFG00000035645.2	ENSCAFG00000035645	-	-	chr1	31588644	31588644	C	T	0|1	22,3	0.221	25
2	bad responder	intergenic	ENSCAFG00000041026.1(dist=242258),ENSCAFG00000045790.1(dist=105566)	ENSCAFG00000041026	-	-	chr1	32833845	32833845	C	T	0/1	31,6	0.167	37
2	bad responder	intergenic	ENSCAFG00000041613.1(dist=497614),ENSCAFG00000000294.4(dist=18503)	ENSCAFG00000041613	-	-	chr1	33754187	33754187	G	C	0|1	22,3	0.2	25
2	bad responder	intergenic	ENSCAFG00000041613.1(dist=497619),ENSCAFG00000000294.4(dist=18498)	ENSCAFG00000041613	-	-	chr1	33754192	33754192	G	C	0|1	20,3	0.221	23
2	bad responder	intergenic	ENSCAFG00000045567.1(dist=9440),ENSCAFG00000000300.5(dist=195732)	ENSCAFG00000045567	-	-	chr1	34173374	34173374	A	G	0|1	29,3	0.121	32
2	bad responder	intergenic	ENSCAFG00000045567.1(dist=9449),ENSCAFG00000000300.5(dist=195723)	ENSCAFG00000045567	-	-	chr1	34173383	34173383	C	T	0|1	32,3	0.112	35
2	bad responder	intronic	ENSCAFG00000000303.4	ENSCAFG00000000303	AIG1	AIG1	chr1	34825754	34825754	A	C	0/1	43,5	0.151	48
2	bad responder	intronic	ENSCAFG00000000312.6	ENSCAFG00000000312	PHACTR2	PHACTR2	chr1	35203852	35203852	G	A	0/1	23,3	0.141	26
2	bad responder	intergenic	ENSCAFG00000042935.1(dist=9543),ENSCAFG00000044383.1(dist=47047)	ENSCAFG00000042935	-	-	chr1	36410956	36410956	T	C	0|1	26,6	0.217	32
2	bad responder	intergenic	ENSCAFG00000042935.1(dist=9546),ENSCAFG00000044383.1(dist=47044)	ENSCAFG00000042935	-	-	chr1	36410959	36410959	G	C	0|1	26,6	0.217	32
2	bad responder	intergenic	ENSCAFG00000000335.4(dist=30935),ENSCAFG00000000338.4(dist=12566)	ENSCAFG00000000335	-	-	chr1	37193976	37193976	A	C	0|1	15,5	0.267	20
2	bad responder	intronic	ENSCAFG00000023693.4	ENSCAFG00000023693	ADGB	ADGB	chr1	37895131	37895131	C	T	0/1	19,8	0.263	27
2	bad responder	intergenic	ENSCAFG00000038339.2(dist=149097),ENSCAFG00000047931.1(dist=288418)	ENSCAFG00000038339	-	-	chr1	38648552	38648552	T	-	0/1	10,17	0.61	27
2	bad responder	intergenic	ENSCAFG00000038339.2(dist=281169),ENSCAFG00000047931.1(dist=156346)	ENSCAFG00000038339	-	-	chr1	38780624	38780624	C	G	0/1	13,3	0.286	16
2	bad responder	intronic	ENSCAFG00000000366.4	ENSCAFG00000000366	SASH1	SASH1	chr1	39346604	39346604	T	A	0|1	13,3	0.231	16
2	bad responder	intergenic	ENSCAFG00000000366.4(dist=112355),ENSCAFG00000000372.4(dist=44232)	ENSCAFG00000000366	-	-	chr1	39589269	39589269	T	A	0/1	32,4	0.148	36
2	bad responder	intronic	ENSCAFG00000000372.4	ENSCAFG00000000372	UST	UST	chr1	39864163	39864163	C	T	0|1	16,3	0.187	19
2	bad responder	intronic	ENSCAFG00000000372.4	ENSCAFG00000000372	UST	UST	chr1	39864168	39864168	A	G	0|1	16,3	0.187	19
2	bad responder	intronic	ENSCAFG00000000393.4	ENSCAFG00000000393	PCMT1	PCMT1	chr1	40537132	40537132	A	G	0/1	19,4	0.187	23
2	bad responder	intergenic	ENSCAFG00000047219.1(dist=7411),ENSCAFG00000000405.4(dist=144140)	ENSCAFG00000047219	-	-	chr1	40928360	40928360	C	T	0/1	24,4	0.166	28
2	bad responder	intronic	ENSCAFG00000000405.4	ENSCAFG00000000405	PLEKHG1	PLEKHG1	chr1	41205356	41205356	A	C	0|1	28,3	0.173	31
2	bad responder	intronic	ENSCAFG00000000405.4	ENSCAFG00000000405	PLEKHG1	PLEKHG1	chr1	41205361	41205361	G	T	0|1	30,3	0.167	33
2	bad responder	intronic	ENSCAFG00000000429.4	ENSCAFG00000000429	CCDC170	CCDC170	chr1	41874807	41874807	-	AC	0/1	15,9	0.352	24
2	bad responder	intergenic	ENSCAFG00000000429.4(dist=109328),ENSCAFG00000000430.4(dist=40381)	ENSCAFG00000000429	-	-	chr1	42041588	42041588	G	T	0/1	24,2	0.15	26
2	bad responder	intronic	ENSCAFG00000000535.4	ENSCAFG00000000535	MYCT1	MYCT1	chr1	42909512	42909512	G	A	0/1	10,6	0.417	16
2	bad responder	intergenic	ENSCAFG00000049691.1(dist=442672),ENSCAFG00000040985.1(dist=59270)	ENSCAFG00000049691	-	-	chr1	43912949	43912949	-	A	0/1	10,12	0.558	22
2	bad responder	intronic	ENSCAFG00000000562.5	ENSCAFG00000000562	CNKSR3	CNKSR3	chr1	44299825	44299825	A	T	0/1	5,8	0.572	13
2	bad responder	intergenic	ENSCAFG00000000570.4(dist=43999),ENSCAFG00000000577.4(dist=142201)	ENSCAFG00000000570	-	-	chr1	44727902	44727902	A	G	0/1	22,3	0.148	25
2	bad responder	intergenic	ENSCAFG00000000589.5(dist=52257),ENSCAFG00000040090.2(dist=11725)	ENSCAFG00000000589	-	-	chr1	45238767	45238767	G	C	0|1	27,5	0.208	32
2	bad responder	intergenic	ENSCAFG00000040090.2(dist=163618),ENSCAFG00000048185.1(dist=104125)	ENSCAFG00000040090	-	-	chr1	45416583	45416583	T	A	0/1	32,3	0.111	35
2	bad responder	downstream	ENSCAFG00000044586.1	ENSCAFG00000044586	-	-	chr1	45880160	45880161	AG	-	0|1	25,4	0.19	29
2	bad responder	downstream	ENSCAFG00000044586.1	ENSCAFG00000044586	-	-	chr1	45880163	45880163	-	CT	0|1	25,4	0.19	29
2	bad responder	intronic	ENSCAFG00000000608.5	ENSCAFG00000000608	ARID1B	ARID1B	chr1	46577778	46577778	G	C	0/1	32,2	0.079	34
2	bad responder	intronic	ENSCAFG00000000608.5	ENSCAFG00000000608	ARID1B	ARID1B	chr1	46581774	46581774	T	C	0|1	22,3	0.136	25
2	bad responder	intronic	ENSCAFG00000000608.5	ENSCAFG00000000608	ARID1B	ARID1B	chr1	46581777	46581777	G	A	0|1	22,3	0.136	25
2	bad responder	intergenic	ENSCAFG00000043445.1(dist=11732),ENSCAFG00000000624.4(dist=56237)	ENSCAFG00000043445	-	-	chr1	47241449	47241449	A	C	0|1	33,5	0.151	38
2	bad responder	intergenic	ENSCAFG00000043445.1(dist=11735),ENSCAFG00000000624.4(dist=56234)	ENSCAFG00000043445	-	-	chr1	47241452	47241452	G	T	0|1	33,5	0.151	38
2	bad responder	intergenic	ENSCAFG00000043445.1(dist=18827),ENSCAFG00000000624.4(dist=49142)	ENSCAFG00000043445	-	-	chr1	47248544	47248544	A	T	0|1	15,2	0.2	17
2	bad responder	intronic	ENSCAFG00000000627.5	ENSCAFG00000000627	SNX9	SNX9	chr1	47444942	47444942	G	A	0/1	18,3	0.245	21
2	bad responder	intergenic	ENSCAFG00000000627.5(dist=2357),ENSCAFG00000043390.1(dist=22384)	ENSCAFG00000000627	-	-	chr1	47458294	47458294	-	CACA	0/1	16,3	0.265	19
2	bad responder	exonic	ENSCAFG00000000644.4	ENSCAFG00000000644	SYNJ2	SYNJ2	chr1	47517838	47517838	G	C	0/1	29,15	0.367	44
2	bad responder	intronic	ENSCAFG00000000655.5	ENSCAFG00000000655	TMEM181	TMEM181	chr1	48009899	48009899	C	G	0|1	35,3	0.143	38
2	bad responder	intronic	ENSCAFG00000000655.5	ENSCAFG00000000655	TMEM181	TMEM181	chr1	48009904	48009904	C	G	0|1	35,4	0.178	39
2	bad responder	intergenic	ENSCAFG00000000740.4(dist=2996),ENSCAFG00000000742.3(dist=24243)	ENSCAFG00000000740	-	-	chr1	49065798	49065798	A	G	0/1	19,4	0.157	23
2	bad responder	intronic	ENSCAFG00000000769.4	ENSCAFG00000000769	PRKN	PRKN	chr1	50535146	50535146	G	A	0/1	18,3	0.187	21
2	bad responder	intronic	ENSCAFG00000000769.4	ENSCAFG00000000769	PRKN	PRKN	chr1	50548918	50548918	T	G	0/1	19,5	0.221	24
2	bad responder	intronic	ENSCAFG00000000769.4	ENSCAFG00000000769	PRKN	PRKN	chr1	50864542	50864542	A	G	0/1	32,4	0.125	36
2	bad responder	intronic	ENSCAFG00000000769.4	ENSCAFG00000000769	PRKN	PRKN	chr1	50945504	50945504	A	-	0/1	64,10	0.133	74
2	bad responder	intronic	ENSCAFG00000000769.4	ENSCAFG00000000769	PRKN	PRKN	chr1	51136114	51136114	A	G	0/1	15,13	0.429	28
2	bad responder	intronic	ENSCAFG00000000770.4	ENSCAFG00000000770	PACRG	PACRG	chr1	51302163	51302163	A	G	0/1	22,4	0.157	26
2	bad responder	intronic	ENSCAFG00000000770.4	ENSCAFG00000000770	PACRG	PACRG	chr1	51716438	51716438	T	C	0/1	25,4	0.136	29
2	bad responder	intergenic	ENSCAFG00000045220.1(dist=285457),ENSCAFG00000000776.4(dist=12575)	ENSCAFG00000045220	-	-	chr1	52994765	52994765	T	C	0|1	20,3	0.2	23
2	bad responder	intergenic	ENSCAFG00000045220.1(dist=285458),ENSCAFG00000000776.4(dist=12574)	ENSCAFG00000045220	-	-	chr1	52994766	52994766	G	A	0|1	20,3	0.2	23
2	bad responder	intergenic	ENSCAFG00000000776.4(dist=81453),ENSCAFG00000048457.1(dist=35165)	ENSCAFG00000000776	-	-	chr1	53089296	53089296	C	A	0/1	12,13	0.476	25
2	bad responder	intronic	ENSCAFG00000000795.5	ENSCAFG00000000795	PDE10A	PDE10A	chr1	53690453	53690453	G	C	0/1	20,17	0.429	37
2	bad responder	intergenic	ENSCAFG00000000795.5(dist=21861),ENSCAFG00000023764.3(dist=21104)	ENSCAFG00000000795	-	-	chr1	53823827	53823827	A	T	0/1	9,13	0.556	22
2	bad responder	intergenic	ENSCAFG00000043164.1(dist=33781),ENSCAFG00000044996.1(dist=38302)	ENSCAFG00000043164	-	-	chr1	55662532	55662532	T	C	0/1	35,4	0.111	39
2	bad responder	intergenic	ENSCAFG00000046455.1(dist=16086),ENSCAFG00000000874.5(dist=36881)	ENSCAFG00000046455	-	-	chr1	56365643	56365643	T	C	0/1	33,4	0.111	37
2	bad responder	intergenic	ENSCAFG00000046455.1(dist=39158),ENSCAFG00000000874.5(dist=13809)	ENSCAFG00000046455	-	-	chr1	56388715	56388715	G	A	0/1	12,6	0.313	18
2	bad responder	intronic	ENSCAFG00000032020.2	ENSCAFG00000032020	TRAPPC3L	TRAPPC3L	chr1	56927280	56927280	C	T	0/1	24,7	0.227	31
2	bad responder	intergenic	ENSCAFG00000000923.4(dist=21327),ENSCAFG00000000925.4(dist=16920)	ENSCAFG00000000923	-	-	chr1	57699088	57699088	T	C	0/1	14,13	0.474	27
2	bad responder	intronic	ENSCAFG00000000935.4	ENSCAFG00000000935	CEP85L	CEP85L	chr1	58688422	58688422	G	C	0/1	21,4	0.182	25
2	bad responder	intergenic	ENSCAFG00000022670.2(dist=251754),ENSCAFG00000030746.3(dist=135063)	ENSCAFG00000022670	-	-	chr1	60451790	60451790	A	T	0|1	20,3	0.211	23
2	bad responder	intergenic	ENSCAFG00000022670.2(dist=251757),ENSCAFG00000030746.3(dist=135060)	ENSCAFG00000022670	-	-	chr1	60451793	60451793	A	T	0|1	20,3	0.211	23
2	bad responder	intergenic	ENSCAFG00000022670.2(dist=298609),ENSCAFG00000030746.3(dist=88208)	ENSCAFG00000022670	-	-	chr1	60498645	60498645	A	G	0/1	12,4	0.231	16
2	bad responder	intergenic	ENSCAFG00000028093.1(dist=51083),ENSCAFG00000000989.5(dist=201558)	ENSCAFG00000028093	-	-	chr1	61537666	61537666	T	C	0|1	34,6	0.16	40
2	bad responder	intergenic	ENSCAFG00000028093.1(dist=51105),ENSCAFG00000000989.5(dist=201536)	ENSCAFG00000028093	-	-	chr1	61537688	61537688	C	T	0|1	36,6	0.16	42
2	bad responder	intergenic	ENSCAFG00000000989.5(dist=21044),ENSCAFG00000029950.2(dist=100789)	ENSCAFG00000000989	-	-	chr1	61866340	61866340	C	T	0|1	28,6	0.174	34
2	bad responder	intergenic	ENSCAFG00000000989.5(dist=21045),ENSCAFG00000029950.2(dist=100788)	ENSCAFG00000000989	-	-	chr1	61866341	61866341	C	T	0|1	28,6	0.174	34
2	bad responder	intronic	ENSCAFG00000029950.2	ENSCAFG00000029950	PKIB	FABP7	chr1	62010275	62010275	A	T	0/1	24,3	0.142	27
2	bad responder	intergenic	ENSCAFG00000001016.5(dist=38579),ENSCAFG00000041364.1(dist=109540)	ENSCAFG00000001016	-	-	chr1	62801301	62801301	A	T	0|1	23,3	0.143	26
2	bad responder	intronic	ENSCAFG00000041364.1	ENSCAFG00000041364	NKAIN2	NKAIN2	chr1	63216052	63216052	T	G	0/1	14,10	0.368	24
2	bad responder	intronic	ENSCAFG00000041364.1	ENSCAFG00000041364	NKAIN2	NKAIN2	chr1	63541905	63541905	T	A	0|1	10,5	0.375	15
2	bad responder	intronic	ENSCAFG00000041364.1	ENSCAFG00000041364	NKAIN2	NKAIN2	chr1	63541912	63541912	T	A	0|1	10,5	0.375	15
2	bad responder	intergenic	ENSCAFG00000041364.1(dist=82096),ENSCAFG00000001028.5(dist=22255)	ENSCAFG00000041364	-	-	chr1	63940260	63940260	C	A	0/1	28,4	0.185	32
2	bad responder	intergenic	ENSCAFG00000001028.5(dist=34112),ENSCAFG00000001029.5(dist=6811)	ENSCAFG00000001028	-	-	chr1	64119123	64119123	A	C	0/1	16,8	0.368	24
2	bad responder	intergenic	ENSCAFG00000044225.1(dist=85508),ENSCAFG00000041132.1(dist=88216)	ENSCAFG00000044225	-	-	chr1	64530512	64530512	A	C	0|1	33,5	0.138	38
2	bad responder	intergenic	ENSCAFG00000044225.1(dist=85513),ENSCAFG00000041132.1(dist=88211)	ENSCAFG00000044225	-	-	chr1	64530517	64530517	G	T	0|1	32,5	0.138	37
2	bad responder	intronic	ENSCAFG00000001057.5	ENSCAFG00000001057	TRMT11	TRMT11	chr1	64835577	64835577	A	C	0|1	22,3	0.2	25
2	bad responder	intronic	ENSCAFG00000001057.5	ENSCAFG00000001057	TRMT11	TRMT11	chr1	64835582	64835582	G	T	0|1	23,3	0.19	26
2	bad responder	intergenic	ENSCAFG00000001057.5(dist=103067),ENSCAFG00000029836.2(dist=4150)	ENSCAFG00000001057	-	-	chr1	65167629	65167629	T	A	0/1	33,3	0.14	36
2	bad responder	downstream	ENSCAFG00000047826.1	ENSCAFG00000047826	-	-	chr1	65203338	65203338	C	T	0/1	21,4	0.136	25
2	bad responder	intronic	ENSCAFG00000001101.5	ENSCAFG00000001101	PTPRK	PTPRK	chr1	66839949	66839949	G	A	0/1	13,4	0.25	17
2	bad responder	intronic	ENSCAFG00000001101.5	ENSCAFG00000001101	PTPRK	PTPRK	chr1	66913997	66913997	T	G	0|1	22,2	0.1	24
2	bad responder	intergenic	ENSCAFG00000041075.1(dist=63579),ENSCAFG00000045490.1(dist=122387)	ENSCAFG00000041075	-	-	chr1	67211866	67211866	T	G	0/1	14,7	0.333	21
2	bad responder	intergenic	ENSCAFG00000001114.4(dist=33336),ENSCAFG00000048325.1(dist=1671)	ENSCAFG00000001114	-	-	chr1	68308358	68308358	A	T	0/1	15,3	0.2	18
2	bad responder	intronic	ENSCAFG00000001136.5	ENSCAFG00000001136	EPB41L2	EPB41L2	chr1	69280859	69280859	C	G	0|1	32,3	0.16	35
2	bad responder	intergenic	ENSCAFG00000037048.2(dist=143550),ENSCAFG00000013574.5(dist=66443)	ENSCAFG00000037048	-	-	chr1	69659591	69659591	C	T	0/1	25,5	0.192	30
2	bad responder	intergenic	ENSCAFG00000030584.2(dist=21932),ENSCAFG00000029119.2(dist=18038)	ENSCAFG00000030584	-	-	chr1	70128698	70128698	C	G	0/1	22,4	0.15	26
2	bad responder	intergenic	ENSCAFG00000001216.4(dist=15315),ENSCAFG00000037250.2(dist=45074)	ENSCAFG00000001216	-	-	chr1	70601683	70601683	A	G	0|1	22,5	0.238	27
2	bad responder	intergenic	ENSCAFG00000001216.4(dist=15316),ENSCAFG00000037250.2(dist=45073)	ENSCAFG00000001216	-	-	chr1	70601684	70601684	C	T	0|1	22,5	0.238	27
2	bad responder	intronic	ENSCAFG00000001219.5	ENSCAFG00000001219	ERCC6L2	-	chr1	70911310	70911310	A	T	0|1	29,2	0.119	31
2	bad responder	intronic	ENSCAFG00000001219.5	ENSCAFG00000001219	ERCC6L2	-	chr1	70911311	70911311	A	T	0|1	29,2	0.119	31
2	bad responder	intergenic	ENSCAFG00000001246.4(dist=11367),ENSCAFG00000001286.5(dist=170572)	ENSCAFG00000001246	-	-	chr1	71317029	71317029	-	A	0/1	23,3	0.152	26
2	bad responder	intronic	ENSCAFG00000023549.4	ENSCAFG00000023549	AOPEP	AOPEP	chr1	71726197	71726197	A	T	0|1	35,4	0.138	39
2	bad responder	intergenic	ENSCAFG00000023549.4(dist=28445),ENSCAFG00000001305.4(dist=62041)	ENSCAFG00000023549	-	-	chr1	72037840	72037840	C	A	0/1	12,4	0.25	16
2	bad responder	intergenic	ENSCAFG00000044080.1(dist=8630),ENSCAFG00000044442.1(dist=40081)	ENSCAFG00000044080	-	-	chr1	72524102	72524102	G	A	0/1	26,12	0.309	38
2	bad responder	intergenic	ENSCAFG00000044418.1(dist=36777),ENSCAFG00000046959.1(dist=94051)	ENSCAFG00000044418	-	-	chr1	73000232	73000232	T	G	0|1	32,3	0.125	35
2	bad responder	intergenic	ENSCAFG00000044418.1(dist=36780),ENSCAFG00000046959.1(dist=94048)	ENSCAFG00000044418	-	-	chr1	73000235	73000235	C	A	0|1	32,3	0.125	35
2	bad responder	intergenic	ENSCAFG00000044418.1(dist=81106),ENSCAFG00000046959.1(dist=49722)	ENSCAFG00000044418	-	-	chr1	73044561	73044561	A	G	0/1	21,4	0.157	25
2	bad responder	intergenic	ENSCAFG00000044441.1(dist=4330),ENSCAFG00000001331.6(dist=44151)	ENSCAFG00000044441	-	-	chr1	73357270	73357270	C	G	0|1	28,6	0.231	34
2	bad responder	intergenic	ENSCAFG00000044441.1(dist=4333),ENSCAFG00000001331.6(dist=44148)	ENSCAFG00000044441	-	-	chr1	73357273	73357273	C	G	0|1	27,6	0.231	33
2	bad responder	intronic	ENSCAFG00000001331.6	ENSCAFG00000001331	TUT7	TUT7	chr1	73466946	73466946	A	G	0/1	16,16	0.478	32
2	bad responder	intronic	ENSCAFG00000043726.1	ENSCAFG00000043726	C9orf153	C9orf153	chr1	73517958	73517958	G	A	0|1	8,2	0.273	10
2	bad responder	intronic	ENSCAFG00000043726.1	ENSCAFG00000043726	C9orf153	C9orf153	chr1	73517959	73517959	T	C	0|1	8,2	0.273	10
2	bad responder	intronic	ENSCAFG00000001350.4	ENSCAFG00000001350	GOLM1	GOLM1	chr1	73560097	73560097	C	A	0|1	12,3	0.267	15
2	bad responder	intronic	ENSCAFG00000001350.4	ENSCAFG00000001350	GOLM1	GOLM1	chr1	73560098	73560098	T	G	0|1	12,3	0.267	15
2	bad responder	intronic	ENSCAFG00000001358.5	ENSCAFG00000001358	AGTPBP1	AGTPBP1	chr1	74032399	74032399	T	C	0/1	23,4	0.136	27
2	bad responder	intronic	ENSCAFG00000001380.4	ENSCAFG00000001380	NTRK2	NTRK2	chr1	74451676	74451676	G	A	0/1	22,3	0.158	25
2	bad responder	intronic	ENSCAFG00000001380.4	ENSCAFG00000001380	NTRK2	NTRK2	chr1	74534571	74534571	T	A	0/1	23,3	0.19	26
2	bad responder	intergenic	ENSCAFG00000001380.4(dist=34469),ENSCAFG00000047840.1(dist=112681)	ENSCAFG00000001380	-	-	chr1	74811501	74811501	C	T	0|1	17,3	0.176	20
2	bad responder	intergenic	ENSCAFG00000001380.4(dist=34476),ENSCAFG00000047840.1(dist=112674)	ENSCAFG00000001380	-	-	chr1	74811508	74811508	A	T	0|1	18,3	0.175	21
2	bad responder	intronic	ENSCAFG00000046655.1	ENSCAFG00000046655	SLC28A3	SLC28A3	chr1	75138438	75138438	C	G	0|1	21,4	0.227	25
2	bad responder	intronic	ENSCAFG00000046655.1	ENSCAFG00000046655	SLC28A3	SLC28A3	chr1	75138439	75138439	C	G	0|1	21,4	0.227	25
2	bad responder	intronic	ENSCAFG00000001435.5	ENSCAFG00000001435	UBQLN1	UBQLN1	chr1	75818311	75818311	G	C	0/1	31,3	0.12	34
2	bad responder	intergenic	ENSCAFG00000001446.4(dist=175233),ENSCAFG00000001453.4(dist=32725)	ENSCAFG00000001446	-	-	chr1	76358461	76358461	C	T	0|1	20,2	0.11	22
2	bad responder	intergenic	ENSCAFG00000001446.4(dist=175234),ENSCAFG00000001453.4(dist=32724)	ENSCAFG00000001446	-	-	chr1	76358462	76358462	A	G	0|1	20,3	0.158	23
2	bad responder	intergenic	ENSCAFG00000001453.4(dist=20839),ENSCAFG00000041163.1(dist=321751)	ENSCAFG00000001453	-	-	chr1	76487490	76487490	A	T	0|1	21,2	0.158	23
2	bad responder	intergenic	ENSCAFG00000001453.4(dist=168130),ENSCAFG00000041163.1(dist=174460)	ENSCAFG00000001453	-	-	chr1	76634781	76634781	C	T	0/1	19,14	0.391	33
2	bad responder	intergenic	ENSCAFG00000041163.1(dist=173000),ENSCAFG00000042733.1(dist=75846)	ENSCAFG00000041163	-	-	chr1	76984092	76984092	G	T	0/1	21,4	0.21	25
2	bad responder	intronic	ENSCAFG00000030287.2	ENSCAFG00000030287	-	SPATA31D3	chr1	77373691	77373691	G	A	0/1	26,5	0.173	31
2	bad responder	intronic	ENSCAFG00000030287.2	ENSCAFG00000030287	-	SPATA31D3	chr1	77375426	77375426	A	T	0/1	24,5	0.199	29
2	bad responder	intergenic	ENSCAFG00000046161.1(dist=89849),ENSCAFG00000043705.1(dist=42124)	ENSCAFG00000046161	-	-	chr1	78367484	78367484	T	C	0/1	13,21	0.556	34
2	bad responder	intergenic	ENSCAFG00000001479.3(dist=106276),ENSCAFG00000045327.1(dist=12794)	ENSCAFG00000001479	-	-	chr1	78811373	78811373	C	T	0/1	16,12	0.4	28
2	bad responder	ncRNA_intronic	ENSCAFG00000045327.1	ENSCAFG00000045327	-	-	chr1	78845266	78845266	A	G	0|1	24,2	0.091	26
2	bad responder	intergenic	ENSCAFG00000045327.1(dist=56693),ENSCAFG00000044512.1(dist=3640)	ENSCAFG00000045327	-	-	chr1	79033045	79033045	A	G	0/1	21,4	0.158	25
2	bad responder	intergenic	ENSCAFG00000044512.1(dist=82763),ENSCAFG00000001534.6(dist=4685)	ENSCAFG00000044512	-	-	chr1	79122816	79122816	C	G	0/1	26,4	0.2	30
2	bad responder	intergenic	ENSCAFG00000042774.1(dist=69892),ENSCAFG00000046795.1(dist=135650)	ENSCAFG00000042774	-	-	chr1	79343155	79343155	T	G	0|1	17,2	0.125	19
2	bad responder	intergenic	ENSCAFG00000046795.1(dist=129736),ENSCAFG00000041424.1(dist=641063)	ENSCAFG00000046795	-	-	chr1	79615881	79615881	T	A	0|1	23,3	0.149	26
2	bad responder	intergenic	ENSCAFG00000046795.1(dist=129737),ENSCAFG00000041424.1(dist=641062)	ENSCAFG00000046795	-	-	chr1	79615882	79615882	T	A	0|1	23,3	0.15	26
2	bad responder	intergenic	ENSCAFG00000046795.1(dist=766704),ENSCAFG00000041424.1(dist=4095)	ENSCAFG00000046795	-	-	chr1	80252849	80252849	T	-	0/1	12,15	0.565	27
2	bad responder	intronic	ENSCAFG00000001579.5	ENSCAFG00000001579	GNAQ	GNAQ	chr1	80791350	80791350	A	T	0/1	28,3	0.136	31
2	bad responder	intronic	ENSCAFG00000031429.2	ENSCAFG00000031429	GNA14	GNA14	chr1	81044168	81044168	C	T	0|1	41,5	0.143	46
2	bad responder	intronic	ENSCAFG00000031429.2	ENSCAFG00000031429	GNA14	GNA14	chr1	81044169	81044169	A	G	0|1	41,5	0.143	46
2	bad responder	intronic	ENSCAFG00000001617.5	ENSCAFG00000001617	VPS13A	VPS13A	chr1	81221450	81221450	T	A	0/1	25,4	0.143	29
2	bad responder	intronic	ENSCAFG00000001617.5	ENSCAFG00000001617	VPS13A	VPS13A	chr1	81231596	81231596	C	G	0|1	19,4	0.211	23
2	bad responder	intronic	ENSCAFG00000001690.5	ENSCAFG00000001690	PCSK5	PCSK5	chr1	82358713	82358713	G	T	0/1	8,10	0.5	18
2	bad responder	intergenic	ENSCAFG00000045046.1(dist=132919),ENSCAFG00000001699.5(dist=161458)	ENSCAFG00000045046	-	-	chr1	82923982	82923982	A	G	0/1	25,4	0.149	29
2	bad responder	intergenic	ENSCAFG00000047581.1(dist=90967),ENSCAFG00000045723.1(dist=186550)	ENSCAFG00000047581	-	-	chr1	84336893	84336893	G	A	0/1	22,3	0.15	25
2	bad responder	intronic	ENSCAFG00000001820.4	ENSCAFG00000001820	C1H9orf85	C9orf85	chr1	85756977	85756977	G	T	0|1	32,3	0.078	35
2	bad responder	intronic	ENSCAFG00000001849.4	ENSCAFG00000001849	TRPM3	TRPM3	chr1	86380000	86380000	G	A	0|1	34,2	0.12	36
2	bad responder	intronic	ENSCAFG00000001849.4	ENSCAFG00000001849	TRPM3	TRPM3	chr1	86849200	86849200	G	C	0|1	31,3	0.124	34
2	bad responder	intronic	ENSCAFG00000001849.4	ENSCAFG00000001849	TRPM3	TRPM3	chr1	86849205	86849205	G	C	0|1	31,3	0.124	34
2	bad responder	intergenic	ENSCAFG00000001867.4(dist=25244),ENSCAFG00000001880.5(dist=58098)	ENSCAFG00000001867	-	-	chr1	87136769	87136769	C	T	0/1	21,3	0.157	24
2	bad responder	intronic	ENSCAFG00000001880.5	ENSCAFG00000001880	SMC5	-	chr1	87244266	87244268	AAG	-	0/1	16,4	0.267	20
2	bad responder	intergenic	ENSCAFG00000028932.2(dist=21023),ENSCAFG00000001893.4(dist=42756)	ENSCAFG00000028932	-	-	chr1	87527778	87527778	T	-	0/1	11,19	0.615	30
2	bad responder	intergenic	ENSCAFG00000001974.6(dist=46148),ENSCAFG00000001982.5(dist=13242)	ENSCAFG00000001974	-	-	chr1	89664291	89664291	G	C	0|1	28,4	0.174	32
2	bad responder	intergenic	ENSCAFG00000001974.6(dist=46149),ENSCAFG00000001982.5(dist=13241)	ENSCAFG00000001974	-	-	chr1	89664292	89664292	G	C	0|1	28,4	0.174	32
2	bad responder	intronic	ENSCAFG00000001982.5	ENSCAFG00000001982	DMRT1	DMRT1	chr1	89688324	89688324	G	A	0/1	20,13	0.455	33
2	bad responder	intergenic	ENSCAFG00000033384.2(dist=87400),ENSCAFG00000002013.6(dist=13596)	ENSCAFG00000033384	-	-	chr1	90698924	90698924	T	G	0|1	30,4	0.192	34
2	bad responder	intergenic	ENSCAFG00000033384.2(dist=87401),ENSCAFG00000002013.6(dist=13595)	ENSCAFG00000033384	-	-	chr1	90698925	90698925	C	A	0|1	30,4	0.191	34
2	bad responder	intergenic	ENSCAFG00000002013.6(dist=108016),ENSCAFG00000042401.1(dist=28959)	ENSCAFG00000002013	-	-	chr1	90991638	90991638	G	A	0/1	15,4	0.235	19
2	bad responder	intergenic	ENSCAFG00000002013.6(dist=114315),ENSCAFG00000042401.1(dist=22660)	ENSCAFG00000002013	-	-	chr1	90997937	90997937	A	T	0/1	9,20	0.65	29
2	bad responder	intergenic	ENSCAFG00000002013.6(dist=127600),ENSCAFG00000042401.1(dist=9375)	ENSCAFG00000002013	-	-	chr1	91011222	91011222	T	G	0/1	12,14	0.526	26
2	bad responder	intronic	ENSCAFG00000002053.5	ENSCAFG00000002053	RFX3	RFX3	chr1	91909231	91909231	T	C	0|1	24,3	0.19	27
2	bad responder	intronic	ENSCAFG00000002053.5	ENSCAFG00000002053	RFX3	RFX3	chr1	91909234	91909234	G	A	0|1	25,3	0.182	28
2	bad responder	intergenic	ENSCAFG00000034142.2(dist=28863),ENSCAFG00000031499.2(dist=66624)	ENSCAFG00000034142	-	-	chr1	92215540	92215540	G	C	0/1	38,4	0.172	42
2	bad responder	intronic	ENSCAFG00000002072.5	ENSCAFG00000002072	SPATA6L	SPATA6L	chr1	92999829	92999829	G	A	0/1	17,16	0.464	33
2	bad responder	intergenic	ENSCAFG00000002139.4(dist=124269),ENSCAFG00000002155.4(dist=153889)	ENSCAFG00000002139	-	-	chr1	94381809	94381809	A	G	0|1	29,4	0.16	33
2	bad responder	intergenic	ENSCAFG00000002139.4(dist=124270),ENSCAFG00000002155.4(dist=153888)	ENSCAFG00000002139	-	-	chr1	94381810	94381810	C	T	0|1	29,4	0.16	33
2	bad responder	intronic	ENSCAFG00000002159.4	ENSCAFG00000002159	-	-	chr1	94933129	94933129	A	G	0/1	28,6	0.173	34
2	bad responder	intergenic	ENSCAFG00000002163.5(dist=35977),ENSCAFG00000002166.4(dist=7915)	ENSCAFG00000002163	-	-	chr1	95316128	95316128	A	C	0|1	32,3	0.111	35
2	bad responder	intergenic	ENSCAFG00000002163.5(dist=35982),ENSCAFG00000002166.4(dist=7910)	ENSCAFG00000002163	-	-	chr1	95316133	95316133	G	T	0|1	30,3	0.115	33
2	bad responder	intronic	ENSCAFG00000030145.3	ENSCAFG00000030145	AUH	AUH	chr1	95555885	95555885	C	T	0/1	24,3	0.13	27
2	bad responder	intergenic	ENSCAFG00000002171.5(dist=21080),ENSCAFG00000043206.1(dist=76209)	ENSCAFG00000002171	-	-	chr1	95976663	95976663	A	G	0/1	10,13	0.55	23
2	bad responder	intergenic	ENSCAFG00000002171.5(dist=34158),ENSCAFG00000043206.1(dist=63131)	ENSCAFG00000002171	-	-	chr1	95989741	95989741	G	T	0|1	22,4	0.19	26
2	bad responder	intergenic	ENSCAFG00000002171.5(dist=34159),ENSCAFG00000043206.1(dist=63130)	ENSCAFG00000002171	-	-	chr1	95989742	95989742	A	C	0|1	22,4	0.19	26
2	bad responder	intergenic	ENSCAFG00000047224.1(dist=11698),ENSCAFG00000035929.2(dist=119700)	ENSCAFG00000047224	-	-	chr1	96256784	96256784	G	A	0/1	17,3	0.167	20
2	bad responder	ncRNA_intronic	ENSCAFG00000035929.2	ENSCAFG00000035929	-	-	chr1	96382925	96382925	A	C	0|1	19,3	0.221	22
2	bad responder	ncRNA_intronic	ENSCAFG00000035929.2	ENSCAFG00000035929	-	-	chr1	96382926	96382926	G	T	0|1	19,3	0.221	22
2	bad responder	ncRNA_intronic	ENSCAFG00000047403.1	ENSCAFG00000047403	-	-	chr1	96458005	96458005	A	T	0|1	31,4	0.115	35
2	bad responder	upstream	ENSCAFG00000048476.1	ENSCAFG00000048476	-	-	chr1	96636884	96636884	G	A	0/1	21,3	0.167	24
2	bad responder	intronic	ENSCAFG00000002188.5	ENSCAFG00000002188	SECISBP2	SECISBP2	chr1	96882173	96882173	T	A	0/1	32,4	0.12	36
2	bad responder	intergenic	ENSCAFG00000043411.1(dist=1626),ENSCAFG00000042779.1(dist=17216)	ENSCAFG00000043411	-	-	chr1	97579564	97579564	G	C	0|1	29,5	0.192	34
2	bad responder	intergenic	ENSCAFG00000043411.1(dist=1627),ENSCAFG00000042779.1(dist=17215)	ENSCAFG00000043411	-	-	chr1	97579565	97579565	G	C	0|1	29,5	0.192	34
2	bad responder	upstream	ENSCAFG00000042779.1	ENSCAFG00000042779	-	-	chr1	97598627	97598627	G	A	0|1	23,4	0.181	27
2	bad responder	upstream	ENSCAFG00000042779.1	ENSCAFG00000042779	-	-	chr1	97598630	97598630	T	C	0|1	23,4	0.181	27
2	bad responder	intronic	ENSCAFG00000002212.4	ENSCAFG00000002212	CDK20	CDK20	chr1	97656000	97656000	A	G	0/1	19,4	0.142	23
2	bad responder	intergenic	ENSCAFG00000002237.3(dist=12445),ENSCAFG00000048395.1(dist=42141)	ENSCAFG00000002237	-	-	chr1	98063549	98063549	G	C	0|1	23,2	0.158	25
2	bad responder	intergenic	ENSCAFG00000029776.2(dist=1885),ENSCAFG00000023343.3(dist=11406)	ENSCAFG00000029776	-	-	chr1	99916235	99916235	-	G	0|1	7,14	0.667	21
2	bad responder	intergenic	ENSCAFG00000029776.2(dist=1890),ENSCAFG00000023343.3(dist=11401)	ENSCAFG00000029776	-	-	chr1	99916240	99916240	A	G	0|1	8,14	0.632	22
2	bad responder	intronic	ENSCAFG00000046247.1	ENSCAFG00000046247	-	ZNF671	chr1	99959715	99959715	A	T	0/1	16,9	0.348	25
2	bad responder	intergenic	ENSCAFG00000002431.4(dist=60874),ENSCAFG00000044428.1(dist=67292)	ENSCAFG00000002431	-	-	chr1	100957805	100957805	C	G	0|1	27,4	0.207	31
2	bad responder	intergenic	ENSCAFG00000030221.2(dist=8276),ENSCAFG00000029312.2(dist=43568)	ENSCAFG00000030221	-	-	chr1	101506862	101506862	C	A	0|1	17,4	0.235	21
2	bad responder	intronic	ENSCAFG00000002618.3,ENSCAFG00000002620.5	ENSCAFG00000002618	TNNI3	TNNI3	chr1	102476407	102476407	C	T	0/1	26,3	0.136	29
2	bad responder	intergenic	ENSCAFG00000024198.4(dist=24743),ENSCAFG00000028940.3(dist=23316)	ENSCAFG00000024198	-	-	chr1	103158722	103158722	G	C	0/1	29,4	0.174	33
2	bad responder	intronic	ENSCAFG00000044740.1	ENSCAFG00000044740	-	ZNF195	chr1	103993079	103993079	G	C	0|1	28,3	0.115	31
2	bad responder	intronic	ENSCAFG00000044740.1	ENSCAFG00000044740	-	ZNF195	chr1	104017884	104017884	A	T	0/1	20,3	0.166	23
2	bad responder	intergenic	ENSCAFG00000047374.1(dist=23327),ENSCAFG00000042771.1(dist=7991)	ENSCAFG00000047374	-	-	chr1	104369313	104369313	A	G	0|1	42,5	0.15	47
2	bad responder	intergenic	ENSCAFG00000047374.1(dist=23329),ENSCAFG00000042771.1(dist=7989)	ENSCAFG00000047374	-	-	chr1	104369315	104369315	A	G	0|1	42,5	0.15	47
2	bad responder	intergenic	ENSCAFG00000042771.1(dist=11257),ENSCAFG00000042064.1(dist=12513)	ENSCAFG00000042771	-	-	chr1	104408482	104408482	G	A	0/1	27,9	0.276	36
2	bad responder	intergenic	ENSCAFG00000042771.1(dist=11269),ENSCAFG00000042064.1(dist=12501)	ENSCAFG00000042771	-	-	chr1	104408494	104408494	G	C	0/1	26,8	0.276	34
2	bad responder	intergenic	ENSCAFG00000028980.2(dist=9501),ENSCAFG00000002834.4(dist=2164)	ENSCAFG00000028980	-	-	chr1	105565069	105565069	A	C	0|1	31,2	0.124	33
2	bad responder	intergenic	ENSCAFG00000028980.2(dist=9506),ENSCAFG00000002834.4(dist=2159)	ENSCAFG00000028980	-	-	chr1	105565074	105565074	G	T	0|1	33,2	0.125	35
2	bad responder	intronic	ENSCAFG00000003698.5,ENSCAFG00000003711.5	ENSCAFG00000003698	TEAD2	TEAD2	chr1	107120804	107120804	T	A	0/1	21,4	0.2	25
2	bad responder	intergenic	ENSCAFG00000003981.4(dist=18039),ENSCAFG00000003993.4(dist=55645)	ENSCAFG00000003981	-	-	chr1	107738915	107738915	G	-	0/1	17,6	0.332	23
2	bad responder	intronic	ENSCAFG00000043522.1	ENSCAFG00000043522	-	KDELR1	chr1	107859359	107859359	A	G	0/1	28,4	0.13	32
2	bad responder	intergenic	ENSCAFG00000004036.5(dist=5346),ENSCAFG00000030032.2(dist=5264)	ENSCAFG00000004036	-	-	chr1	107942309	107942309	G	A	0/1	22,3	0.176	25
2	bad responder	intronic	ENSCAFG00000004061.5	ENSCAFG00000004061	ELSPBP1	ELSPBP1	chr1	108182414	108182414	G	T	0|1	32,3	0.133	35
2	bad responder	intergenic	ENSCAFG00000004193.4(dist=40886),ENSCAFG00000004201.3(dist=4089)	ENSCAFG00000004193	-	-	chr1	109146116	109146116	G	T	0/1	30,4	0.16	34
2	bad responder	intronic	ENSCAFG00000004575.4	ENSCAFG00000004575	ZNF296	ZNF296	chr1	110410179	110410179	A	G	0/1	24,4	0.136	28
2	bad responder	intronic	ENSCAFG00000014247.5	ENSCAFG00000014247	CEACAM28	-	chr1	111821156	111821157	CA	-	0/1	26,3	0.173	29
2	bad responder	intronic	ENSCAFG00000014247.5	ENSCAFG00000014247	CEACAM28	-	chr1	111832058	111832058	C	G	0/1	34,5	0.207	39
2	bad responder	intronic	ENSCAFG00000004911.5	ENSCAFG00000004911	POU2F2	POU2F2	chr1	112241978	112241978	T	C	0/1	14,8	0.349	22
2	bad responder	intergenic	ENSCAFG00000023933.3(dist=23171),ENSCAFG00000030737.2(dist=51298)	ENSCAFG00000023933	-	-	chr1	112511139	112511139	G	A	0/1	26,9	0.26	35
2	bad responder	intergenic	ENSCAFG00000023933.3(dist=60104),ENSCAFG00000030737.2(dist=14365)	ENSCAFG00000023933	-	-	chr1	112548072	112548072	T	-	0/1	59,7	0.119	66
2	bad responder	intronic	ENSCAFG00000005388.5	ENSCAFG00000005388	AKT2	AKT2	chr1	113371776	113371776	A	C	0|1	21,3	0.158	24
2	bad responder	intronic	ENSCAFG00000005406.4	ENSCAFG00000005406	-	FCGBP	chr1	113621740	113621740	G	A	0|1	24,2	0.157	26
2	bad responder	intronic	ENSCAFG00000005406.4	ENSCAFG00000005406	-	FCGBP	chr1	113621745	113621745	T	C	0|1	24,2	0.167	26
2	bad responder	intergenic	ENSCAFG00000005673.4(dist=6021),ENSCAFG00000005776.5(dist=3175)	ENSCAFG00000005673	-	-	chr1	114306518	114306518	G	T	0|1	11,3	0.25	14
2	bad responder	intronic	ENSCAFG00000005776.5	ENSCAFG00000005776	ACTN4	ACTN4	chr1	114410766	114410766	C	T	0|1	16,7	0.333	23
2	bad responder	intronic	ENSCAFG00000005776.5	ENSCAFG00000005776	ACTN4	ACTN4	chr1	114410771	114410771	A	G	0|1	17,5	0.278	22
2	bad responder	intergenic	ENSCAFG00000028601.2(dist=6846),ENSCAFG00000045193.1(dist=5984)	ENSCAFG00000028601	-	-	chr1	115650898	115650898	C	T	0/1	29,6	0.159	35
2	bad responder	intronic	ENSCAFG00000006951.6	ENSCAFG00000006951	ATP4A	ATP4A	chr1	117112586	117112586	C	T	0/1	18,15	0.417	33
2	bad responder	intergenic	ENSCAFG00000007024.5(dist=1889),ENSCAFG00000007025.5(dist=7540)	ENSCAFG00000007024	-	-	chr1	117159916	117159916	C	G	0/1	28,4	0.16	32
2	bad responder	intronic	ENSCAFG00000031202.2	ENSCAFG00000031202	-	ZNF181	chr1	117761750	117761750	T	A	0|1	26,3	0.157	29
2	bad responder	intronic	ENSCAFG00000024101.3	ENSCAFG00000024101	CHST8	CHST8	chr1	118467964	118467964	C	A	0|1	25,3	0.174	28
2	bad responder	intronic	ENSCAFG00000024101.3	ENSCAFG00000024101	CHST8	CHST8	chr1	118515730	118515730	G	A	0/1	25,4	0.143	29
2	bad responder	ncRNA_intronic	ENSCAFG00000043274.1	ENSCAFG00000043274	-	-	chr1	118584254	118584254	C	G	0/1	26,3	0.148	29
2	bad responder	intronic	ENSCAFG00000007440.4	ENSCAFG00000007440	WDR88	WDR88	chr1	118971141	118971141	C	A	0|1	23,2	0.158	25
2	bad responder	exonic	ENSCAFG00000007465.5	ENSCAFG00000007465	RHPN2	RHPN2	chr1	119089281	119089281	A	G	0/1	15,3	0.187	18
2	bad responder	intronic	ENSCAFG00000007505.5	ENSCAFG00000007505	TDRD12	-	chr1	119238929	119238929	A	G	0/1	14,3	0.187	17
2	bad responder	intronic	ENSCAFG00000007590.4	ENSCAFG00000007590	ZNF507	ZNF507	chr1	119564829	119564829	A	G	0/1	19,4	0.158	23
2	bad responder	ncRNA_intronic	ENSCAFG00000047373.1	ENSCAFG00000047373	-	-	chr1	119684916	119684916	C	T	0/1	20,12	0.385	32
2	bad responder	ncRNA_intronic	ENSCAFG00000047215.1	ENSCAFG00000047215	-	-	chr1	119964091	119964091	A	G	0|1	28,4	0.173	32
2	bad responder	intergenic	ENSCAFG00000044385.1(dist=27749),ENSCAFG00000044311.1(dist=53649)	ENSCAFG00000044385	-	-	chr1	120121421	120121421	A	G	0/1	25,4	0.15	29
2	bad responder	intergenic	ENSCAFG00000048320.1(dist=31632),ENSCAFG00000033119.2(dist=45947)	ENSCAFG00000048320	-	-	chr1	120649860	120649860	T	C	0/1	14,22	0.577	36
2	bad responder	intronic	ENSCAFG00000007601.4	ENSCAFG00000007601	ZNF536	ZNF536	chr1	121011953	121011953	C	T	0/1	26,3	0.136	29
2	bad responder	intronic	ENSCAFG00000007601.4	ENSCAFG00000007601	ZNF536	ZNF536	chr1	121265166	121265166	T	C	0/1	22,3	0.156	25
2	bad responder	intergenic	ENSCAFG00000049211.1(dist=60253),ENSCAFG00000007606.6(dist=76557)	ENSCAFG00000049211	-	-	chr1	121453646	121453646	C	T	0/1	17,8	0.368	25
2	bad responder	intergenic	ENSCAFG00000047000.1(dist=35845),ENSCAFG00000007621.4(dist=12726)	ENSCAFG00000047000	-	-	chr1	121745510	121745510	G	A	0|1	29,3	0.126	32
2	bad responder	intergenic	ENSCAFG00000047000.1(dist=35848),ENSCAFG00000007621.4(dist=12723)	ENSCAFG00000047000	-	-	chr1	121745513	121745513	T	C	0|1	29,3	0.126	32
2	bad responder	intronic	ENSCAFG00000000134.4	ENSCAFG00000000134	RBMS2	RBMS2	chr10	822161	822161	T	C	0|1	21,3	0.211	24
2	bad responder	intronic	ENSCAFG00000000134.4	ENSCAFG00000000134	RBMS2	RBMS2	chr10	822162	822162	G	A	0|1	21,3	0.211	24
2	bad responder	intronic	ENSCAFG00000000215.5	ENSCAFG00000000215	R3HDM2	R3HDM2	chr10	1385650	1385650	C	T	0/1	14,3	0.231	17
2	bad responder	intergenic	ENSCAFG00000000316.4(dist=143930),ENSCAFG00000048044.1(dist=1049761)	ENSCAFG00000000316	-	-	chr10	3640080	3640080	G	A	0/1	13,3	0.229	16
2	bad responder	intergenic	ENSCAFG00000000316.4(dist=666910),ENSCAFG00000048044.1(dist=526781)	ENSCAFG00000000316	-	-	chr10	4163060	4163060	C	A	0|1	14,2	0.199	16
2	bad responder	intergenic	ENSCAFG00000000316.4(dist=954267),ENSCAFG00000048044.1(dist=239424)	ENSCAFG00000000316	-	-	chr10	4450417	4450417	G	A	0/1	11,15	0.5	26
2	bad responder	intergenic	ENSCAFG00000000316.4(dist=1075106),ENSCAFG00000048044.1(dist=118585)	ENSCAFG00000000316	-	-	chr10	4571256	4571256	A	G	0|1	9,5	0.416	14
2	bad responder	intergenic	ENSCAFG00000000316.4(dist=1075107),ENSCAFG00000048044.1(dist=118584)	ENSCAFG00000000316	-	-	chr10	4571257	4571257	A	G	0|1	9,5	0.416	14
2	bad responder	intergenic	ENSCAFG00000000316.4(dist=1141828),ENSCAFG00000048044.1(dist=51863)	ENSCAFG00000000316	-	-	chr10	4637978	4637978	C	T	0/1	21,3	0.176	24
2	bad responder	ncRNA_intronic	ENSCAFG00000048044.1	ENSCAFG00000048044	-	-	chr10	4842231	4842231	C	G	0/1	25,3	0.181	28
2	bad responder	intronic	ENSCAFG00000032565.2	ENSCAFG00000032565	TAFA2	TAFA2	chr10	5153592	5153592	C	G	0|1	35,5	0.178	40
2	bad responder	intronic	ENSCAFG00000032565.2	ENSCAFG00000032565	TAFA2	TAFA2	chr10	5193520	5193520	G	T	0/1	18,9	0.381	27
2	bad responder	intergenic	ENSCAFG00000047388.1(dist=105523),ENSCAFG00000000323.5(dist=88807)	ENSCAFG00000047388	-	-	chr10	5421215	5421215	G	A	0/1	18,4	0.176	22
2	bad responder	intergenic	ENSCAFG00000000339.4(dist=21265),ENSCAFG00000043679.1(dist=63125)	ENSCAFG00000000339	-	-	chr10	6290927	6290927	T	C	0|1	9,3	0.332	12
2	bad responder	intergenic	ENSCAFG00000000339.4(dist=21266),ENSCAFG00000043679.1(dist=63124)	ENSCAFG00000000339	-	-	chr10	6290928	6290928	G	A	0|1	9,3	0.332	12
2	bad responder	intergenic	ENSCAFG00000000361.5(dist=6850),ENSCAFG00000041316.1(dist=41981)	ENSCAFG00000000361	-	-	chr10	7519555	7519555	T	C	0|1	21,4	0.19	25
2	bad responder	intergenic	ENSCAFG00000044689.1(dist=218748),ENSCAFG00000041633.1(dist=158831)	ENSCAFG00000044689	-	-	chr10	8402489	8402489	A	G	0/1	21,4	0.149	25
2	bad responder	intergenic	ENSCAFG00000044689.1(dist=357099),ENSCAFG00000041633.1(dist=20480)	ENSCAFG00000044689	-	-	chr10	8540840	8540840	G	A	0/1	24,3	0.15	27
2	bad responder	intergenic	ENSCAFG00000000384.5(dist=147840),ENSCAFG00000047979.1(dist=258919)	ENSCAFG00000000384	-	-	chr10	9211688	9211688	A	T	0|1	18,2	0.175	20
2	bad responder	intergenic	ENSCAFG00000000384.5(dist=147848),ENSCAFG00000047979.1(dist=258911)	ENSCAFG00000000384	-	-	chr10	9211696	9211696	A	T	0|1	18,2	0.176	20
2	bad responder	intergenic	ENSCAFG00000041215.1(dist=4556),ENSCAFG00000047360.1(dist=76143)	ENSCAFG00000041215	-	-	chr10	9804303	9804303	G	C	0/1	15,4	0.2	19
2	bad responder	intergenic	ENSCAFG00000047360.1(dist=81537),ENSCAFG00000000407.3(dist=12009)	ENSCAFG00000047360	-	-	chr10	9968071	9968071	-	A	0/1	28,4	0.183	32
2	bad responder	ncRNA_intronic	ENSCAFG00000043488.1	ENSCAFG00000043488	-	-	chr10	10108945	10108945	A	C	0|1	12,2	0.231	14
2	bad responder	ncRNA_intronic	ENSCAFG00000043488.1	ENSCAFG00000043488	-	-	chr10	10108950	10108950	G	T	0|1	11,2	0.248	13
2	bad responder	intergenic	ENSCAFG00000000428.4(dist=11564),ENSCAFG00000039202.2(dist=51236)	ENSCAFG00000000428	-	-	chr10	11394209	11394209	C	A	0|1	17,2	0.167	19
2	bad responder	intergenic	ENSCAFG00000000434.2(dist=12620),ENSCAFG00000000435.5(dist=2367)	ENSCAFG00000000434	-	-	chr10	11597970	11597970	G	A	0/1	16,7	0.341	23
2	bad responder	intronic	ENSCAFG00000000436.4	ENSCAFG00000000436	RAB3IP	RAB3IP	chr10	11709892	11709892	C	G	0/1	9,4	0.332	13
2	bad responder	intergenic	ENSCAFG00000000439.4(dist=75425),ENSCAFG00000000441.4(dist=82185)	ENSCAFG00000000439	-	-	chr10	11927577	11927577	G	A	0/1	10,7	0.467	17
2	bad responder	intronic	ENSCAFG00000000446.5	ENSCAFG00000000446	PTPRB	PTPRB	chr10	12380974	12380974	A	G	0|1	21,3	0.142	24
2	bad responder	intronic	ENSCAFG00000000446.5	ENSCAFG00000000446	PTPRB	PTPRB	chr10	12380975	12380975	C	T	0|1	21,3	0.142	24
2	bad responder	intronic	ENSCAFG00000023742.3	ENSCAFG00000023742	PTPRR	PTPRR	chr10	12400220	12400220	G	A	0/1	27,11	0.285	38
2	bad responder	intronic	ENSCAFG00000023742.3	ENSCAFG00000023742	PTPRR	PTPRR	chr10	12419734	12419734	G	T	0|1	21,4	0.158	25
2	bad responder	intronic	ENSCAFG00000000462.4	ENSCAFG00000000462	TPH2	TPH2	chr10	13493297	13493297	A	G	0/1	15,7	0.333	22
2	bad responder	intergenic	ENSCAFG00000000462.4(dist=20704),ENSCAFG00000049376.1(dist=106352)	ENSCAFG00000000462	-	-	chr10	13547947	13547947	G	C	0|1	27,2	0.136	29
2	bad responder	intergenic	ENSCAFG00000000462.4(dist=20705),ENSCAFG00000049376.1(dist=106351)	ENSCAFG00000000462	-	-	chr10	13547948	13547948	G	C	0|1	27,2	0.136	29
2	bad responder	intronic	ENSCAFG00000000525.5	ENSCAFG00000000525	GLIPR1	GLIPR1	chr10	15975152	15975152	A	-	0|1	32,6	0.154	38
2	bad responder	intronic	ENSCAFG00000000525.5	ENSCAFG00000000525	GLIPR1	GLIPR1	chr10	15975159	15975159	-	T	0|1	33,6	0.154	39
2	bad responder	intergenic	ENSCAFG00000000554.4(dist=8328),ENSCAFG00000000558.4(dist=31260)	ENSCAFG00000000554	-	-	chr10	16578655	16578655	T	C	0/1	16,15	0.476	31
2	bad responder	ncRNA_intronic	ENSCAFG00000043762.1	ENSCAFG00000043762	-	-	chr10	17644173	17644173	G	C	0|1	33,4	0.133	37
2	bad responder	ncRNA_intronic	ENSCAFG00000043762.1	ENSCAFG00000043762	-	-	chr10	17645312	17645312	G	A	0/1	28,8	0.25	36
2	bad responder	intergenic	ENSCAFG00000043762.1(dist=385323),ENSCAFG00000000731.4(dist=77550)	ENSCAFG00000043762	-	-	chr10	18041901	18041901	T	A	0|1	25,2	0.136	27
2	bad responder	intergenic	ENSCAFG00000040670.2(dist=29910),ENSCAFG00000041979.1(dist=78337)	ENSCAFG00000040670	-	-	chr10	18411633	18411633	T	G	0/1	27,3	0.129	30
2	bad responder	intergenic	ENSCAFG00000040670.2(dist=71280),ENSCAFG00000041979.1(dist=36967)	ENSCAFG00000040670	-	-	chr10	18453003	18453003	G	A	0/1	15,3	0.2	18
2	bad responder	intergenic	ENSCAFG00000041325.1(dist=96658),ENSCAFG00000044592.1(dist=103467)	ENSCAFG00000041325	-	-	chr10	18629708	18629708	A	T	0/1	20,3	0.21	23
2	bad responder	intergenic	ENSCAFG00000031708.2(dist=20554),ENSCAFG00000046240.1(dist=15429)	ENSCAFG00000031708	-	-	chr10	20461258	20461258	C	T	0/1	20,3	0.221	23
2	bad responder	intronic	ENSCAFG00000000804.4	ENSCAFG00000000804	FBLN1	FBLN1	chr10	20608782	20608782	A	G	0/1	24,3	0.141	27
2	bad responder	intergenic	ENSCAFG00000047497.1(dist=8747),ENSCAFG00000000887.5(dist=6286)	ENSCAFG00000047497	-	-	chr10	21649528	21649528	C	A	0|1	30,5	0.138	35
2	bad responder	intergenic	ENSCAFG00000047497.1(dist=8748),ENSCAFG00000000887.5(dist=6285)	ENSCAFG00000047497	-	-	chr10	21649529	21649529	T	G	0|1	30,5	0.138	35
2	bad responder	intronic	ENSCAFG00000000902.5	ENSCAFG00000000902	EFCAB6	EFCAB6	chr10	21940098	21940098	G	T	0|1	11,2	0.25	13
2	bad responder	intronic	ENSCAFG00000000902.5	ENSCAFG00000000902	EFCAB6	EFCAB6	chr10	21940101	21940101	A	C	0|1	10,2	0.271	12
2	bad responder	intronic	ENSCAFG00000000902.5	ENSCAFG00000000902	EFCAB6	EFCAB6	chr10	21991946	21991946	G	A	0/1	11,3	0.231	14
2	bad responder	intronic	ENSCAFG00000000904.3	ENSCAFG00000000904	MPPED1	MPPED1	chr10	22086550	22086550	C	T	0/1	16,12	0.45	28
2	bad responder	intronic	ENSCAFG00000000907.3	ENSCAFG00000000907	SCUBE1	SCUBE1	chr10	22262617	22262617	G	A	0|1	41,3	0.091	44
2	bad responder	intronic	ENSCAFG00000000943.5	ENSCAFG00000000943	ARFGAP3	ARFGAP3	chr10	22666554	22666554	G	C	0|1	30,3	0.167	33
2	bad responder	intronic	ENSCAFG00000000943.5	ENSCAFG00000000943	ARFGAP3	ARFGAP3	chr10	22666564	22666564	C	T	0|1	33,3	0.148	36
2	bad responder	intergenic	ENSCAFG00000000970.4(dist=73230),ENSCAFG00000000975.5(dist=7053)	ENSCAFG00000000970	-	-	chr10	23001340	23001340	G	A	0|1	32,3	0.111	35
2	bad responder	intergenic	ENSCAFG00000000970.4(dist=73231),ENSCAFG00000000975.5(dist=7052)	ENSCAFG00000000970	-	-	chr10	23001341	23001341	T	C	0|1	32,3	0.111	35
2	bad responder	intergenic	ENSCAFG00000000975.5(dist=66558),ENSCAFG00000000978.5(dist=28480)	ENSCAFG00000000975	-	-	chr10	23112123	23112123	C	G	0|1	21,3	0.15	24
2	bad responder	intergenic	ENSCAFG00000000975.5(dist=81601),ENSCAFG00000000978.5(dist=13437)	ENSCAFG00000000975	-	-	chr10	23127166	23127166	A	C	0|1	14,4	0.312	18
2	bad responder	intergenic	ENSCAFG00000000975.5(dist=81606),ENSCAFG00000000978.5(dist=13432)	ENSCAFG00000000975	-	-	chr10	23127171	23127171	G	T	0|1	14,4	0.312	18
2	bad responder	intergenic	ENSCAFG00000044204.1(dist=22897),ENSCAFG00000000982.4(dist=1738)	ENSCAFG00000044204	-	-	chr10	23282195	23282195	A	C	0|1	17,4	0.222	21
2	bad responder	intergenic	ENSCAFG00000044204.1(dist=22902),ENSCAFG00000000982.4(dist=1733)	ENSCAFG00000044204	-	-	chr10	23282200	23282200	G	T	0|1	16,4	0.235	20
2	bad responder	intronic	ENSCAFG00000001023.4	ENSCAFG00000001023	MEI1	MEI1	chr10	23589800	23589800	G	A	0|1	12,3	0.248	15
2	bad responder	intronic	ENSCAFG00000001023.4	ENSCAFG00000001023	MEI1	MEI1	chr10	23589801	23589801	T	C	0|1	12,3	0.248	15
2	bad responder	intronic	ENSCAFG00000001125.6	ENSCAFG00000001125	EP300	EP300	chr10	24127828	24127828	C	A	0|1	20,5	0.272	25
2	bad responder	intronic	ENSCAFG00000001125.6	ENSCAFG00000001125	EP300	EP300	chr10	24127833	24127833	T	G	0|1	20,5	0.273	25
2	bad responder	intergenic	ENSCAFG00000020733.1(dist=2720),ENSCAFG00000001134.4(dist=5170)	ENSCAFG00000020733	-	-	chr10	24301921	24301921	A	G	0|1	7,3	0.364	10
2	bad responder	intergenic	ENSCAFG00000020733.1(dist=2721),ENSCAFG00000001134.4(dist=5169)	ENSCAFG00000020733	-	-	chr10	24301922	24301922	C	T	0|1	7,3	0.364	10
2	bad responder	intronic	ENSCAFG00000001255.6	ENSCAFG00000001255	TNRC6B	TNRC6B	chr10	24839292	24839292	C	T	0/1	31,3	0.115	34
2	bad responder	intronic	ENSCAFG00000001255.6	ENSCAFG00000001255	TNRC6B	TNRC6B	chr10	24874728	24874728	G	C	0/1	33,4	0.143	37
2	bad responder	intronic	ENSCAFG00000001255.6	ENSCAFG00000001255	TNRC6B	TNRC6B	chr10	24942131	24942131	C	G	0|1	17,4	0.25	21
2	bad responder	intronic	ENSCAFG00000001255.6	ENSCAFG00000001255	TNRC6B	TNRC6B	chr10	24942132	24942132	C	G	0|1	17,4	0.25	21
2	bad responder	intronic	ENSCAFG00000001255.6	ENSCAFG00000001255	TNRC6B	TNRC6B	chr10	24972314	24972314	G	T	0|1	33,2	0.107	35
2	bad responder	intronic	ENSCAFG00000001255.6	ENSCAFG00000001255	TNRC6B	TNRC6B	chr10	24972315	24972315	A	C	0|1	33,2	0.107	35
2	bad responder	intronic	ENSCAFG00000001296.4	ENSCAFG00000001296	GRAP2	GRAP2	chr10	25197197	25197197	T	A	0/1	17,3	0.186	20
2	bad responder	intergenic	ENSCAFG00000029842.2(dist=14850),ENSCAFG00000001424.5(dist=8914)	ENSCAFG00000029842	-	-	chr10	26500781	26500781	G	A	0/1	22,4	0.15	26
2	bad responder	intronic	ENSCAFG00000031949.2	ENSCAFG00000031949	PDXP	PDXP	chr10	26947458	26947458	T	A	0|1	23,3	0.13	26
2	bad responder	intergenic	ENSCAFG00000001504.4(dist=29148),ENSCAFG00000001506.4(dist=22663)	ENSCAFG00000001504	-	-	chr10	27216742	27216742	G	C	0/1	36,4	0.142	40
2	bad responder	intergenic	ENSCAFG00000001504.4(dist=29155),ENSCAFG00000001506.4(dist=22656)	ENSCAFG00000001504	-	-	chr10	27216749	27216749	T	G	0/1	36,4	0.142	40
2	bad responder	intergenic	ENSCAFG00000001526.4(dist=29844),ENSCAFG00000029809.2(dist=13759)	ENSCAFG00000001526	-	-	chr10	27737176	27737176	A	G	0/1	19,4	0.175	23
2	bad responder	intronic	ENSCAFG00000001550.4	ENSCAFG00000001550	FOXRED2	FOXRED2	chr10	27919977	27919977	T	C	0|1	18,3	0.187	21
2	bad responder	intronic	ENSCAFG00000001705.4	ENSCAFG00000001705	MB	MB	chr10	28559657	28559657	C	T	0/1	23,4	0.136	27
2	bad responder	intronic	ENSCAFG00000001740.4	ENSCAFG00000001740	LARGE1	LARGE1	chr10	30186318	30186318	G	C	0/1	25,3	0.143	28
2	bad responder	intronic	ENSCAFG00000001885.4	ENSCAFG00000001885	APPL2	APPL2	chr10	33197686	33197686	T	A	0/1	23,3	0.149	26
2	bad responder	intronic	ENSCAFG00000001885.4	ENSCAFG00000001885	APPL2	APPL2	chr10	33225447	33225447	C	T	0/1	26,4	0.149	30
2	bad responder	intergenic	ENSCAFG00000032127.2(dist=63557),ENSCAFG00000001944.4(dist=12228)	ENSCAFG00000032127	-	-	chr10	33874115	33874115	C	G	0|1	35,4	0.172	39
2	bad responder	intergenic	ENSCAFG00000032127.2(dist=63560),ENSCAFG00000001944.4(dist=12225)	ENSCAFG00000032127	-	-	chr10	33874118	33874118	C	G	0|1	35,4	0.172	39
2	bad responder	intergenic	ENSCAFG00000043264.1(dist=5378),ENSCAFG00000027903.1(dist=27320)	ENSCAFG00000043264	-	-	chr10	34771663	34771663	A	T	0/1	23,3	0.156	26
2	bad responder	upstream	ENSCAFG00000002082.4	ENSCAFG00000002082	-	TPGS2	chr10	37112071	37112071	T	C	0|1	35,2	0.111	37
2	bad responder	upstream	ENSCAFG00000002082.4	ENSCAFG00000002082	-	TPGS2	chr10	37112074	37112074	G	A	0|1	34,2	0.115	36
2	bad responder	ncRNA_intronic	ENSCAFG00000049587.1	ENSCAFG00000049587	-	-	chr10	37283151	37283151	C	G	0/1	21,3	0.19	24
2	bad responder	intronic	ENSCAFG00000002099.4	ENSCAFG00000002099	NCK2	NCK2	chr10	37619615	37619615	A	T	0|1	21,3	0.197	24
2	bad responder	intronic	ENSCAFG00000002099.4	ENSCAFG00000002099	NCK2	NCK2	chr10	37654866	37654866	C	T	0/1	21,11	0.391	32
2	bad responder	intergenic	ENSCAFG00000040981.1(dist=39858),ENSCAFG00000002122.4(dist=53963)	ENSCAFG00000040981	-	-	chr10	38253272	38253272	G	A	0/1	12,4	0.231	16
2	bad responder	intergenic	ENSCAFG00000035222.2(dist=50539),ENSCAFG00000049933.1(dist=382489)	ENSCAFG00000035222	-	-	chr10	39603022	39603022	A	G	0/1	22,6	0.273	28
2	bad responder	intergenic	ENSCAFG00000049933.1(dist=46689),ENSCAFG00000032659.2(dist=58155)	ENSCAFG00000049933	-	-	chr10	40043942	40043942	G	C	0/1	30,4	0.185	34
2	bad responder	intronic	ENSCAFG00000029466.2	ENSCAFG00000029466	SLC9A4	SLC9A4	chr10	40540979	40540979	C	T	0/1	23,3	0.135	26
2	bad responder	intergenic	ENSCAFG00000002142.5(dist=85584),ENSCAFG00000002145.5(dist=15649)	ENSCAFG00000002142	-	-	chr10	40762941	40762941	-	A	0/1	7,18	0.663	25
2	bad responder	intronic	ENSCAFG00000002145.5	ENSCAFG00000002145	IL1RL2	IL1RL2	chr10	40787565	40787565	G	A	0/1	25,3	0.142	28
2	bad responder	intergenic	ENSCAFG00000002199.5(dist=50140),ENSCAFG00000002206.5(dist=11538)	ENSCAFG00000002199	-	-	chr10	41718085	41718085	T	C	0/1	19,10	0.35	29
2	bad responder	intronic	ENSCAFG00000002206.5	ENSCAFG00000002206	TBC1D8	TBC1D8	chr10	41777644	41777644	A	G	0/1	14,13	0.455	27
2	bad responder	intronic	ENSCAFG00000023079.4	ENSCAFG00000023079	AFF3	REV1	chr10	42713309	42713309	A	G	0/1	15,3	0.214	18
2	bad responder	intronic	ENSCAFG00000023079.4	ENSCAFG00000023079	AFF3	REV1	chr10	42886671	42886674	CACA	-	0/1	18,5	0.199	23
2	bad responder	intronic	ENSCAFG00000023079.4	ENSCAFG00000023079	AFF3	REV1	chr10	42988367	42988367	C	G	0/1	28,3	0.166	31
2	bad responder	intergenic	ENSCAFG00000002358.5(dist=86655),ENSCAFG00000002365.4(dist=5859)	ENSCAFG00000002358	-	-	chr10	44594794	44594794	A	G	0/1	21,4	0.165	25
2	bad responder	UTR5	ENSCAFG00000041005.1(ENSCAFT00000080299.1:c.-3173T>C)	ENSCAFG00000041005	C2orf92	C2orf92	chr10	44954466	44954466	A	G	0/1	19,3	0.176	22
2	bad responder	intergenic	ENSCAFG00000002404.4(dist=3581),ENSCAFG00000002406.5(dist=14962)	ENSCAFG00000002404	-	-	chr10	45200825	45200825	A	G	0/1	26,3	0.181	29
2	bad responder	intronic	ENSCAFG00000002546.5	ENSCAFG00000002546	CAMKMT	CAMKMT	chr10	47094172	47094172	T	A	0/1	26,4	0.174	30
2	bad responder	intergenic	ENSCAFG00000002547.4(dist=39301),ENSCAFG00000002550.4(dist=17098)	ENSCAFG00000002547	-	-	chr10	47382936	47382936	A	T	0/1	29,3	0.189	32
2	bad responder	intronic	ENSCAFG00000002610.4	ENSCAFG00000002610	PRKCE	PRKCE	chr10	48425104	48425104	T	C	0/1	18,3	0.176	21
2	bad responder	intronic	ENSCAFG00000002641.4	ENSCAFG00000002641	TTC7A	TTC7A	chr10	49228482	49228482	C	T	0/1	4,7	0.616	11
2	bad responder	intronic	ENSCAFG00000002641.4,ENSCAFG00000002643.4	ENSCAFG00000002641	TTC7A	TTC7A	chr10	49288689	49288689	A	G	0|1	20,3	0.181	23
2	bad responder	intronic	ENSCAFG00000002641.4,ENSCAFG00000002643.4	ENSCAFG00000002641	TTC7A	TTC7A	chr10	49288690	49288690	C	T	0|1	20,3	0.181	23
2	bad responder	intergenic	ENSCAFG00000028352.1(dist=55404),ENSCAFG00000002664.5(dist=65288)	ENSCAFG00000028352	-	-	chr10	49738610	49738610	G	C	0|1	18,2	0.125	20
2	bad responder	intergenic	ENSCAFG00000028352.1(dist=55413),ENSCAFG00000002664.5(dist=65279)	ENSCAFG00000028352	-	-	chr10	49738619	49738619	A	G	0|1	19,2	0.125	21
2	bad responder	intergenic	ENSCAFG00000002695.5(dist=9848),ENSCAFG00000002696.3(dist=5889)	ENSCAFG00000002695	-	-	chr10	50607884	50607884	A	G	0/1	22,3	0.166	25
2	bad responder	intergenic	ENSCAFG00000002698.3(dist=18868),ENSCAFG00000035012.2(dist=21872)	ENSCAFG00000002698	-	-	chr10	50957342	50957342	A	T	0/1	26,3	0.19	29
2	bad responder	intergenic	ENSCAFG00000035012.2(dist=10425),ENSCAFG00000047878.1(dist=14122)	ENSCAFG00000035012	-	-	chr10	51032931	51032931	A	G	0/1	14,3	0.247	17
2	bad responder	intronic	ENSCAFG00000002712.4	ENSCAFG00000002712	NRXN1	NRXN1	chr10	51626481	51626481	G	A	0/1	11,15	0.524	26
2	bad responder	intronic	ENSCAFG00000002712.4	ENSCAFG00000002712	NRXN1	NRXN1	chr10	51677481	51677481	A	C	0/1	15,10	0.444	25
2	bad responder	intronic	ENSCAFG00000002712.4	ENSCAFG00000002712	NRXN1	NRXN1	chr10	52408061	52408061	G	C	0|1	27,3	0.182	30
2	bad responder	intronic	ENSCAFG00000002712.4	ENSCAFG00000002712	NRXN1	NRXN1	chr10	52408062	52408062	G	C	0|1	27,3	0.182	30
2	bad responder	intergenic	ENSCAFG00000043154.1(dist=347774),ENSCAFG00000048746.1(dist=454046)	ENSCAFG00000043154	-	-	chr10	53423657	53423657	G	A	0/1	21,4	0.157	25
2	bad responder	intergenic	ENSCAFG00000043154.1(dist=700982),ENSCAFG00000048746.1(dist=100838)	ENSCAFG00000043154	-	-	chr10	53776865	53776865	A	C	0/1	7,11	0.6	18
2	bad responder	intergenic	ENSCAFG00000029777.2(dist=93246),ENSCAFG00000002721.4(dist=444969)	ENSCAFG00000029777	-	-	chr10	54267778	54267778	A	G	0/1	23,4	0.158	27
2	bad responder	intergenic	ENSCAFG00000029777.2(dist=432669),ENSCAFG00000002721.4(dist=105546)	ENSCAFG00000029777	-	-	chr10	54607201	54607201	C	G	0|1	27,3	0.172	30
2	bad responder	intergenic	ENSCAFG00000037766.2(dist=48853),ENSCAFG00000002744.5(dist=5069)	ENSCAFG00000037766	-	-	chr10	55424871	55424871	T	A	0/1	26,3	0.12	29
2	bad responder	intronic	ENSCAFG00000002744.5	ENSCAFG00000002744	SPTBN1	SPTBN1	chr10	55497458	55497458	T	A	0/1	6,19	0.765	25
2	bad responder	intergenic	ENSCAFG00000002919.4(dist=48386),ENSCAFG00000048888.1(dist=52718)	ENSCAFG00000002919	-	-	chr10	56835573	56835573	T	A	0/1	25,4	0.2	29
2	bad responder	intronic	ENSCAFG00000002927.4	ENSCAFG00000002927	CCDC85A	CCDC85A	chr10	57075815	57075815	G	A	0/1	15,13	0.381	28
2	bad responder	intergenic	ENSCAFG00000045394.1(dist=114090),ENSCAFG00000043555.1(dist=218705)	ENSCAFG00000045394	-	-	chr10	57390758	57390758	G	C	0|1	20,3	0.167	23
2	bad responder	intergenic	ENSCAFG00000043555.1(dist=34315),ENSCAFG00000044647.1(dist=269411)	ENSCAFG00000043555	-	-	chr10	57817290	57817290	-	A	0/1	6,10	0.598	16
2	bad responder	intergenic	ENSCAFG00000043517.1(dist=74267),ENSCAFG00000044161.1(dist=584702)	ENSCAFG00000043517	-	-	chr10	59345746	59345746	T	C	0|1	26,3	0.182	29
2	bad responder	intergenic	ENSCAFG00000043517.1(dist=74272),ENSCAFG00000044161.1(dist=584697)	ENSCAFG00000043517	-	-	chr10	59345751	59345751	G	A	0|1	28,3	0.174	31
2	bad responder	intergenic	ENSCAFG00000043517.1(dist=157679),ENSCAFG00000044161.1(dist=501290)	ENSCAFG00000043517	-	-	chr10	59429158	59429158	G	C	0/1	13,3	0.248	16
2	bad responder	ncRNA_intronic	ENSCAFG00000044161.1	ENSCAFG00000044161	-	-	chr10	60093021	60093021	A	T	0|1	18,3	0.199	21
2	bad responder	intergenic	ENSCAFG00000044161.1(dist=337069),ENSCAFG00000002955.6(dist=142805)	ENSCAFG00000044161	-	-	chr10	60446903	60446903	A	C	0|1	28,3	0.166	31
2	bad responder	intergenic	ENSCAFG00000044161.1(dist=337074),ENSCAFG00000002955.6(dist=142800)	ENSCAFG00000044161	-	-	chr10	60446908	60446908	G	T	0|1	29,3	0.159	32
2	bad responder	intergenic	ENSCAFG00000044161.1(dist=389656),ENSCAFG00000002955.6(dist=90218)	ENSCAFG00000044161	-	-	chr10	60499490	60499490	C	T	0|1	29,2	0.129	31
2	bad responder	intronic	ENSCAFG00000002986.4	ENSCAFG00000002986	PUS10	PUS10	chr10	61055161	61055161	C	T	0|1	43,3	0.114	46
2	bad responder	intronic	ENSCAFG00000002986.4	ENSCAFG00000002986	PUS10	PUS10	chr10	61055162	61055162	A	G	0|1	43,3	0.114	46
2	bad responder	intergenic	ENSCAFG00000003083.4(dist=8045),ENSCAFG00000003090.4(dist=3847)	ENSCAFG00000003083	-	-	chr10	61882434	61882434	C	T	0/1	14,4	0.235	18
2	bad responder	intronic	ENSCAFG00000003119.4	ENSCAFG00000003119	WDPCP	WDPCP	chr10	63000820	63000820	G	A	0/1	33,6	0.148	39
2	bad responder	intergenic	ENSCAFG00000003162.4(dist=100966),ENSCAFG00000031586.2(dist=201586)	ENSCAFG00000003162	-	-	chr10	63844269	63844269	A	G	0/1	17,11	0.4	28
2	bad responder	upstream	ENSCAFG00000042739.1	ENSCAFG00000042739	-	-	chr10	64381157	64381157	G	A	0/1	9,11	0.5	20
2	bad responder	ncRNA_intronic	ENSCAFG00000042158.1	ENSCAFG00000042158	-	-	chr10	64431536	64431536	C	G	0/1	36,3	0.137	39
2	bad responder	downstream	ENSCAFG00000042720.1	ENSCAFG00000042720	-	-	chr10	65001144	65001144	G	C	0/1	34,3	0.115	37
2	bad responder	intergenic	ENSCAFG00000048201.1(dist=100848),ENSCAFG00000046449.1(dist=175717)	ENSCAFG00000048201	-	-	chr10	65275668	65275668	G	C	0|1	25,3	0.13	28
2	bad responder	intergenic	ENSCAFG00000048201.1(dist=100859),ENSCAFG00000046449.1(dist=175706)	ENSCAFG00000048201	-	-	chr10	65275679	65275679	G	C	0|1	26,3	0.125	29
2	bad responder	intergenic	ENSCAFG00000003239.5(dist=28502),ENSCAFG00000047730.1(dist=24433)	ENSCAFG00000003239	-	-	chr10	66672230	66672230	C	T	0|1	18,2	0.176	20
2	bad responder	intergenic	ENSCAFG00000003239.5(dist=28503),ENSCAFG00000047730.1(dist=24432)	ENSCAFG00000003239	-	-	chr10	66672231	66672231	A	G	0|1	18,2	0.176	20
2	bad responder	ncRNA_intronic	ENSCAFG00000041212.1	ENSCAFG00000041212	-	-	chr10	66848834	66848834	G	A	0/1	16,10	0.45	26
2	bad responder	intronic	ENSCAFG00000003262.4	ENSCAFG00000003262	APLF	APLF	chr10	67466862	67466862	A	G	0|1	17,5	0.235	22
2	bad responder	intronic	ENSCAFG00000003262.4	ENSCAFG00000003262	APLF	APLF	chr10	67466863	67466863	C	T	0|1	17,5	0.235	22
2	bad responder	intronic	ENSCAFG00000029145.2	ENSCAFG00000029145	PROKR1	PROKR1	chr10	67552912	67552912	A	T	0/1	20,10	0.376	30
2	bad responder	intronic	ENSCAFG00000003309.5	ENSCAFG00000003309	AAK1	AAK1	chr10	68196545	68196545	G	A	0/1	26,3	0.143	29
2	bad responder	intronic	ENSCAFG00000003366.4	ENSCAFG00000003366	-	TGFA	chr10	68937056	68937056	C	T	0|1	25,4	0.227	29
2	bad responder	intronic	ENSCAFG00000003366.4	ENSCAFG00000003366	-	TGFA	chr10	68937057	68937057	A	G	0|1	25,4	0.227	29
2	bad responder	upstream	ENSCAFG00000045296.1	ENSCAFG00000045296	-	-	chr10	69328793	69328793	G	A	0/1	40,8	0.204	48
2	bad responder	intergenic	NONE(dist=NONE),ENSCAFG00000012938.2(dist=82929)	NONE(dist=NONE),EN	-	-	chr11	32702	32702	A	T	0/1	25,7	0.181	32
2	bad responder	intergenic	NONE(dist=NONE),ENSCAFG00000012938.2(dist=59860)	NONE(dist=NONE),EN	-	-	chr11	55771	55771	A	-	0/1	39,3	0.129	42
2	bad responder	intergenic	NONE(dist=NONE),ENSCAFG00000012938.2(dist=54017)	NONE(dist=NONE),EN	-	-	chr11	61614	61614	T	A	0/1	23,3	0.172	26
2	bad responder	intergenic	ENSCAFG00000012915.5(dist=27696),ENSCAFG00000028826.1(dist=8341)	ENSCAFG00000012915	-	-	chr11	297817	297817	G	A	0/1	11,7	0.353	18
2	bad responder	intergenic	ENSCAFG00000000498.4(dist=17029),ENSCAFG00000000502.4(dist=3254)	ENSCAFG00000000498	-	-	chr11	825535	825535	T	C	0/1	13,4	0.229	17
2	bad responder	intergenic	ENSCAFG00000000391.5(dist=57535),ENSCAFG00000024952.3(dist=13038)	ENSCAFG00000000391	-	-	chr11	1632474	1632474	A	G	0/1	17,4	0.186	21
2	bad responder	intronic	ENSCAFG00000000381.6	ENSCAFG00000000381	TBC1D9B	TBC1D9B	chr11	1816261	1816261	A	T	0|1	44,5	0.121	49
2	bad responder	intergenic	ENSCAFG00000000268.3(dist=1596),ENSCAFG00000048276.1(dist=14332)	ENSCAFG00000000268	-	-	chr11	2745129	2745129	G	T	0/1	23,4	0.143	27
2	bad responder	intergenic	ENSCAFG00000034885.2(dist=41971),ENSCAFG00000000262.3(dist=8984)	ENSCAFG00000034885	-	-	chr11	2855640	2855640	A	C	0/1	29,7	0.214	36
2	bad responder	intronic	ENSCAFG00000031000.3	ENSCAFG00000031000	ZNF354A	ZNF354A	chr11	2914486	2914486	C	G	0/1	27,3	0.165	30
2	bad responder	intergenic	ENSCAFG00000031000.3(dist=8923),ENSCAFG00000047421.1(dist=36703)	ENSCAFG00000031000	-	-	chr11	2926648	2926648	C	T	0|1	24,5	0.192	29
2	bad responder	intergenic	ENSCAFG00000031000.3(dist=8926),ENSCAFG00000047421.1(dist=36700)	ENSCAFG00000031000	-	-	chr11	2926651	2926651	A	G	0|1	24,5	0.192	29
2	bad responder	intergenic	ENSCAFG00000000224.5(dist=17361),ENSCAFG00000033526.2(dist=17765)	ENSCAFG00000000224	-	-	chr11	3629643	3629643	C	G	0/1	22,3	0.158	25
2	bad responder	intergenic	ENSCAFG00000038242.2(dist=239426),ENSCAFG00000049343.1(dist=58169)	ENSCAFG00000038242	-	-	chr11	3951931	3951931	G	A	0|1	20,4	0.158	24
2	bad responder	intergenic	ENSCAFG00000038242.2(dist=239444),ENSCAFG00000049343.1(dist=58151)	ENSCAFG00000038242	-	-	chr11	3951949	3951949	C	A	0|1	21,6	0.19	27
2	bad responder	intergenic	ENSCAFG00000044536.1(dist=26335),ENSCAFG00000049762.1(dist=16183)	ENSCAFG00000044536	-	-	chr11	4752119	4752119	T	A	0|1	24,2	0.111	26
2	bad responder	intergenic	ENSCAFG00000000210.4(dist=16527),ENSCAFG00000041177.1(dist=20567)	ENSCAFG00000000210	-	-	chr11	5288418	5288418	C	G	0/1	17,3	0.187	20
2	bad responder	intronic	ENSCAFG00000000206.4	ENSCAFG00000000206	CDO1	CDO1	chr11	5455126	5455126	G	C	0/1	19,4	0.249	23
2	bad responder	intergenic	ENSCAFG00000038948.2(dist=39574),ENSCAFG00000044580.1(dist=140273)	ENSCAFG00000038948	-	-	chr11	7054568	7054568	G	T	0|1	24,2	0.158	26
2	bad responder	intergenic	ENSCAFG00000042520.1(dist=75404),ENSCAFG00000049365.1(dist=9399)	ENSCAFG00000042520	-	-	chr11	7582624	7582624	A	G	0/1	19,3	0.156	22
2	bad responder	intergenic	ENSCAFG00000049365.1(dist=14598),ENSCAFG00000048564.1(dist=53063)	ENSCAFG00000049365	-	-	chr11	7609210	7609210	A	T	0/1	17,14	0.452	31
2	bad responder	intergenic	ENSCAFG00000000167.5(dist=6449),ENSCAFG00000000165.4(dist=92558)	ENSCAFG00000000167	-	-	chr11	8567999	8567999	A	T	0|1	20,5	0.3	25
2	bad responder	intergenic	ENSCAFG00000000167.5(dist=6450),ENSCAFG00000000165.4(dist=92557)	ENSCAFG00000000167	-	-	chr11	8568000	8568000	A	T	0|1	20,5	0.3	25
2	bad responder	intergenic	ENSCAFG00000030608.2(dist=30432),ENSCAFG00000043429.1(dist=31684)	ENSCAFG00000030608	-	-	chr11	8891923	8891923	G	C	0/1	15,4	0.293	19
2	bad responder	intergenic	ENSCAFG00000045091.1(dist=232110),ENSCAFG00000045233.1(dist=45387)	ENSCAFG00000045091	-	-	chr11	9463262	9463262	G	A	0/1	45,15	0.256	60
2	bad responder	intergenic	ENSCAFG00000045091.1(dist=266001),ENSCAFG00000045233.1(dist=11496)	ENSCAFG00000045091	-	-	chr11	9497153	9497153	C	T	0/1	27,12	0.321	39
2	bad responder	intergenic	ENSCAFG00000042424.1(dist=246472),ENSCAFG00000032519.2(dist=29347)	ENSCAFG00000042424	-	-	chr11	11375329	11375330	GA	-	0/1	32,11	0.294	43
2	bad responder	intronic	ENSCAFG00000032519.2	ENSCAFG00000032519	-	-	chr11	11412547	11412547	A	G	0/1	54,7	0.119	61
2	bad responder	intronic	ENSCAFG00000046803.1	ENSCAFG00000046803	-	-	chr11	11763437	11763437	G	A	0|1	47,4	0.105	51
2	bad responder	intronic	ENSCAFG00000046803.1	ENSCAFG00000046803	-	-	chr11	11763438	11763438	T	C	0|1	47,4	0.105	51
2	bad responder	intergenic	ENSCAFG00000044850.1(dist=54172),ENSCAFG00000000543.4(dist=12418)	ENSCAFG00000044850	-	-	chr11	13131254	13131254	C	T	0|1	24,3	0.157	27
2	bad responder	intergenic	ENSCAFG00000044850.1(dist=54173),ENSCAFG00000000543.4(dist=12417)	ENSCAFG00000044850	-	-	chr11	13131255	13131255	A	G	0|1	24,3	0.158	27
2	bad responder	intergenic	ENSCAFG00000000557.5(dist=340574),ENSCAFG00000048691.1(dist=212363)	ENSCAFG00000000557	-	-	chr11	13804712	13804712	G	A	0/1	14,3	0.203	17
2	bad responder	intergenic	ENSCAFG00000045484.1(dist=50794),ENSCAFG00000044839.1(dist=58325)	ENSCAFG00000045484	-	-	chr11	14211259	14211259	C	T	0/1	27,4	0.159	31
2	bad responder	intergenic	ENSCAFG00000024837.3(dist=88143),ENSCAFG00000000578.3(dist=50065)	ENSCAFG00000024837	-	-	chr11	15310445	15310445	G	T	0/1	10,13	0.524	23
2	bad responder	intergenic	ENSCAFG00000030649.2(dist=118562),ENSCAFG00000000611.5(dist=5274)	ENSCAFG00000030649	-	-	chr11	16373395	16373395	A	T	0|1	21,3	0.21	24
2	bad responder	intronic	ENSCAFG00000000611.5	ENSCAFG00000000611	MEGF10	MEGF10	chr11	16397294	16397294	A	G	0/1	10,11	0.5	21
2	bad responder	intergenic	ENSCAFG00000000681.5(dist=208157),ENSCAFG00000000710.4(dist=139863)	ENSCAFG00000000681	-	-	chr11	17759693	17759693	A	G	0/1	20,3	0.167	23
2	bad responder	intronic	ENSCAFG00000030654.2	ENSCAFG00000030654	CHSY3	CHSY3	chr11	18679392	18679392	C	T	0/1	22,4	0.211	26
2	bad responder	intergenic	ENSCAFG00000030654.2(dist=20181),ENSCAFG00000049613.1(dist=651934)	ENSCAFG00000030654	-	-	chr11	18874358	18874358	T	C	0/1	18,4	0.167	22
2	bad responder	intronic	ENSCAFG00000000737.5	ENSCAFG00000000737	CDC42SE2	CDC42SE2	chr11	19707526	19707526	G	T	0|1	17,4	0.188	21
2	bad responder	intronic	ENSCAFG00000000737.5	ENSCAFG00000000737	CDC42SE2	CDC42SE2	chr11	19707527	19707527	A	C	0|1	17,4	0.188	21
2	bad responder	intronic	ENSCAFG00000000830.4	ENSCAFG00000000830	PDLIM4	PDLIM4	chr11	20579207	20579207	C	G	0/1	20,4	0.143	24
2	bad responder	intergenic	ENSCAFG00000000851.3(dist=13552),ENSCAFG00000000855.4(dist=30309)	ENSCAFG00000000851	-	-	chr11	20795160	20795160	G	A	0|1	18,4	0.209	22
2	bad responder	intergenic	ENSCAFG00000000851.3(dist=13553),ENSCAFG00000000855.4(dist=30308)	ENSCAFG00000000851	-	-	chr11	20795161	20795161	T	C	0|1	18,4	0.209	22
2	bad responder	intergenic	ENSCAFG00000000851.3(dist=25115),ENSCAFG00000000855.4(dist=18746)	ENSCAFG00000000851	-	-	chr11	20806723	20806723	-	G	0/1	21,12	0.391	33
2	bad responder	intronic	ENSCAFG00000000898.5	ENSCAFG00000000898	KIF3A	KIF3A	chr11	21025796	21025796	T	A	0/1	20,3	0.221	23
2	bad responder	intronic	ENSCAFG00000000906.4	ENSCAFG00000000906	SEPTIN8	SEPTIN8	chr11	21086401	21086401	C	T	0/1	18,10	0.348	28
2	bad responder	intronic	ENSCAFG00000000948.4,ENSCAFG00000000968.5	ENSCAFG00000000948	HSPA4	HSPA4	chr11	21487969	21487969	T	C	0/1	25,4	0.129	29
2	bad responder	intronic	ENSCAFG00000000968.5	ENSCAFG00000000968	FSTL4	FSTL4	chr11	21666459	21666459	G	C	0|1	11,2	0.248	13
2	bad responder	intronic	ENSCAFG00000000968.5	ENSCAFG00000000968	FSTL4	FSTL4	chr11	21666460	21666460	G	C	0|1	11,2	0.248	13
2	bad responder	intronic	ENSCAFG00000000968.5	ENSCAFG00000000968	FSTL4	FSTL4	chr11	21777605	21777605	T	A	0/1	26,4	0.159	30
2	bad responder	ncRNA_intronic	ENSCAFG00000041598.1	ENSCAFG00000041598	-	-	chr11	22284850	22284850	A	C	0|1	25,3	0.174	28
2	bad responder	ncRNA_intronic	ENSCAFG00000041598.1	ENSCAFG00000041598	-	-	chr11	22284855	22284855	G	T	0|1	27,3	0.167	30
2	bad responder	ncRNA_intronic	ENSCAFG00000048346.1	ENSCAFG00000048346	-	-	chr11	23137346	23137346	T	C	0/1	15,4	0.266	19
2	bad responder	intergenic	ENSCAFG00000001084.4(dist=94186),ENSCAFG00000048034.1(dist=10401)	ENSCAFG00000001084	-	-	chr11	23701009	23701009	T	A	0/1	25,3	0.15	28
2	bad responder	intergenic	ENSCAFG00000001094.4(dist=13834),ENSCAFG00000001103.4(dist=21929)	ENSCAFG00000001094	-	-	chr11	24092003	24092003	G	A	0|1	5,13	0.733	18
2	bad responder	intergenic	ENSCAFG00000045574.1(dist=27771),ENSCAFG00000049247.1(dist=140085)	ENSCAFG00000045574	-	-	chr11	24430846	24430846	G	C	0|1	23,2	0.15	25
2	bad responder	intergenic	ENSCAFG00000045574.1(dist=27774),ENSCAFG00000049247.1(dist=140082)	ENSCAFG00000045574	-	-	chr11	24430849	24430849	G	C	0|1	24,2	0.15	26
2	bad responder	intronic	ENSCAFG00000001330.4	ENSCAFG00000001330	SIL1	SIL1	chr11	26626686	26626686	G	C	0/1	24,4	0.199	28
2	bad responder	intronic	ENSCAFG00000001434.4	ENSCAFG00000001434	KDM4C	KDM4C	chr11	28010301	28010301	T	A	0/1	19,4	0.186	23
2	bad responder	intergenic	ENSCAFG00000001434.4(dist=17679),ENSCAFG00000049919.1(dist=22481)	ENSCAFG00000001434	-	-	chr11	28119480	28119480	A	G	0/1	15,3	0.199	18
2	bad responder	intergenic	ENSCAFG00000049919.1(dist=167386),ENSCAFG00000041851.1(dist=21989)	ENSCAFG00000049919	-	-	chr11	28352933	28352933	C	G	0/1	26,4	0.19	30
2	bad responder	intergenic	ENSCAFG00000041001.1(dist=90890),ENSCAFG00000001460.4(dist=47732)	ENSCAFG00000041001	-	-	chr11	29056716	29056716	A	G	0/1	8,26	0.668	34
2	bad responder	intergenic	ENSCAFG00000027693.1(dist=28143),ENSCAFG00000048399.1(dist=60445)	ENSCAFG00000027693	-	-	chr11	29777271	29777271	A	G	0/1	12,19	0.546	31
2	bad responder	intergenic	ENSCAFG00000048399.1(dist=17778),ENSCAFG00000041584.1(dist=28513)	ENSCAFG00000048399	-	-	chr11	29879229	29879229	A	C	0/1	16,13	0.45	29
2	bad responder	intergenic	ENSCAFG00000041584.1(dist=104480),ENSCAFG00000024495.2(dist=58725)	ENSCAFG00000041584	-	-	chr11	30201252	30201252	C	T	0/1	18,13	0.409	31
2	bad responder	intergenic	ENSCAFG00000027467.1(dist=17379),ENSCAFG00000043890.1(dist=11837)	ENSCAFG00000027467	-	-	chr11	31347387	31347387	G	A	0/1	20,16	0.481	36
2	bad responder	intergenic	ENSCAFG00000043890.1(dist=136685),ENSCAFG00000042661.1(dist=313994)	ENSCAFG00000043890	-	-	chr11	31528397	31528397	G	A	0/1	17,5	0.222	22
2	bad responder	intergenic	ENSCAFG00000043890.1(dist=370519),ENSCAFG00000042661.1(dist=80160)	ENSCAFG00000043890	-	-	chr11	31762231	31762231	A	G	0/1	9,15	0.608	24
2	bad responder	intergenic	ENSCAFG00000001473.4(dist=22275),ENSCAFG00000001476.4(dist=619687)	ENSCAFG00000001473	-	-	chr11	32251214	32251214	-	A	0/1	16,12	0.449	28
2	bad responder	intergenic	ENSCAFG00000001473.4(dist=225895),ENSCAFG00000001476.4(dist=416067)	ENSCAFG00000001473	-	-	chr11	32454834	32454834	T	-	0/1	26,6	0.167	32
2	bad responder	intergenic	ENSCAFG00000001473.4(dist=230370),ENSCAFG00000001476.4(dist=411592)	ENSCAFG00000001473	-	-	chr11	32459309	32459309	C	A	0/1	21,4	0.158	25
2	bad responder	intergenic	ENSCAFG00000001476.4(dist=272636),ENSCAFG00000046181.1(dist=59479)	ENSCAFG00000001476	-	-	chr11	33143821	33143821	C	T	0/1	24,7	0.237	31
2	bad responder	intronic	ENSCAFG00000001557.5	ENSCAFG00000001557	CCDC171	CCDC171	chr11	35834782	35834782	T	A	0/1	23,2	0.109	25
2	bad responder	intronic	ENSCAFG00000001557.5	ENSCAFG00000001557	CCDC171	CCDC171	chr11	35851945	35851945	G	A	0|1	21,2	0.158	23
2	bad responder	intronic	ENSCAFG00000001562.5	ENSCAFG00000001562	BNC2	BNC2	chr11	36836898	36836898	G	A	0/1	22,3	0.142	25
2	bad responder	intronic	ENSCAFG00000001562.5	ENSCAFG00000001562	BNC2	BNC2	chr11	36928405	36928405	A	T	0|1	36,4	0.143	40
2	bad responder	intronic	ENSCAFG00000001566.5	ENSCAFG00000001566	CNTLN	CNTLN	chr11	37153024	37153024	C	T	0/1	15,4	0.214	19
2	bad responder	intronic	ENSCAFG00000001567.4	ENSCAFG00000001567	SH3GL2	SH3GL2	chr11	37641437	37641437	C	G	0|1	21,2	0.186	23
2	bad responder	intergenic	ENSCAFG00000041269.1(dist=164978),ENSCAFG00000047955.1(dist=79943)	ENSCAFG00000041269	-	-	chr11	38090064	38090064	T	C	0/1	22,3	0.166	25
2	bad responder	intergenic	ENSCAFG00000047955.1(dist=66609),ENSCAFG00000001581.4(dist=92756)	ENSCAFG00000047955	-	-	chr11	38279430	38279430	T	-	0/1	8,16	0.667	24
2	bad responder	intronic	ENSCAFG00000001581.4	ENSCAFG00000001581	ADAMTSL1	ADAMTSL1	chr11	38548492	38548492	A	G	0/1	17,3	0.187	20
2	bad responder	ncRNA_intronic	ENSCAFG00000034177.2	ENSCAFG00000034177	-	-	chr11	42201371	42201371	A	G	0/1	25,4	0.166	29
2	bad responder	intronic	ENSCAFG00000001688.4	ENSCAFG00000001688	ELAVL2	ELAVL2	chr11	42594278	42594278	C	A	0|1	30,4	0.159	34
2	bad responder	intronic	ENSCAFG00000001688.4	ENSCAFG00000001688	ELAVL2	ELAVL2	chr11	42594283	42594283	T	G	0|1	30,4	0.159	34
2	bad responder	intergenic	ENSCAFG00000032482.1(dist=47646),ENSCAFG00000047216.1(dist=40987)	ENSCAFG00000032482	-	-	chr11	42888104	42888104	G	T	0/1	19,10	0.318	29
2	bad responder	ncRNA_intronic	ENSCAFG00000047801.1	ENSCAFG00000047801	-	-	chr11	44388482	44388482	C	G	0|1	29,4	0.174	33
2	bad responder	ncRNA_intronic	ENSCAFG00000047801.1	ENSCAFG00000047801	-	-	chr11	44388485	44388485	C	G	0|1	29,4	0.174	33
2	bad responder	intergenic	ENSCAFG00000042674.1(dist=414449),ENSCAFG00000047734.1(dist=327801)	ENSCAFG00000042674	-	-	chr11	46460980	46460980	T	A	0/1	29,3	0.148	32
2	bad responder	intergenic	ENSCAFG00000043000.1(dist=23501),ENSCAFG00000001734.4(dist=40329)	ENSCAFG00000043000	-	-	chr11	47542579	47542579	C	G	0/1	16,3	0.187	19
2	bad responder	downstream	ENSCAFG00000001734.4	ENSCAFG00000001734	-	-	chr11	47585609	47585609	G	A	0/1	12,8	0.389	20
2	bad responder	intergenic	ENSCAFG00000001734.4(dist=122941),ENSCAFG00000025986.1(dist=178722)	ENSCAFG00000001734	-	-	chr11	47708433	47708433	A	T	0/1	18,4	0.222	22
2	bad responder	intergenic	ENSCAFG00000046755.1(dist=25508),ENSCAFG00000033632.2(dist=26150)	ENSCAFG00000046755	-	-	chr11	48775841	48775841	C	A	0/1	25,6	0.249	31
2	bad responder	intergenic	ENSCAFG00000042049.1(dist=28807),ENSCAFG00000049053.1(dist=7114)	ENSCAFG00000042049	-	-	chr11	49972077	49972077	G	A	0|1	27,3	0.174	30
2	bad responder	intergenic	ENSCAFG00000042049.1(dist=28808),ENSCAFG00000049053.1(dist=7113)	ENSCAFG00000042049	-	-	chr11	49972078	49972078	T	C	0|1	27,3	0.174	30
2	bad responder	intergenic	ENSCAFG00000001812.5(dist=15065),ENSCAFG00000001818.3(dist=8740)	ENSCAFG00000001812	-	-	chr11	50147349	50147349	T	A	0|1	23,7	0.24	30
2	bad responder	intergenic	ENSCAFG00000001812.5(dist=15068),ENSCAFG00000001818.3(dist=8737)	ENSCAFG00000001812	-	-	chr11	50147352	50147352	T	A	0|1	23,6	0.24	29
2	bad responder	intronic	ENSCAFG00000031810.2	ENSCAFG00000031810	UBE2R2	UBE2R2	chr11	50644424	50644424	A	G	0/1	13,5	0.375	18
2	bad responder	ncRNA_intronic	ENSCAFG00000041982.1	ENSCAFG00000041982	-	-	chr11	51261063	51261063	A	T	0/1	30,3	0.12	33
2	bad responder	ncRNA_intronic	ENSCAFG00000041982.1	ENSCAFG00000041982	-	-	chr11	51261076	51261076	A	T	0/1	32,4	0.147	36
2	bad responder	intronic	ENSCAFG00000001954.5	ENSCAFG00000001954	CCL19	CCL19	chr11	51358592	51358592	A	C	0|1	6,2	0.222	8
2	bad responder	intronic	ENSCAFG00000001954.5	ENSCAFG00000001954	CCL19	CCL19	chr11	51358597	51358597	G	T	0|1	6,2	0.222	8
2	bad responder	intergenic	ENSCAFG00000020055.3(dist=20155),ENSCAFG00000025056.3(dist=7966)	ENSCAFG00000020055	-	-	chr11	51463830	51463830	C	T	0|1	39,3	0.12	42
2	bad responder	intronic	ENSCAFG00000002281.4	ENSCAFG00000002281	RECK	RECK	chr11	52519718	52519718	G	C	0/1	38,3	0.125	41
2	bad responder	intronic	ENSCAFG00000002357.5	ENSCAFG00000002357	PAX5	PAX5	chr11	53318038	53318038	G	C	0|1	23,5	0.182	28
2	bad responder	intergenic	ENSCAFG00000002391.4(dist=2334),ENSCAFG00000002394.5(dist=26264)	ENSCAFG00000002391	-	-	chr11	54080932	54080932	C	G	0/1	30,3	0.167	33
2	bad responder	ncRNA_intronic	ENSCAFG00000043130.1	ENSCAFG00000043130	-	-	chr11	54423797	54423797	A	T	0|1	17,2	0.176	19
2	bad responder	intronic	ENSCAFG00000002469.4	ENSCAFG00000002469	NANS	ANP32B	chr11	55297910	55297910	C	A	0|1	24,2	0.1	26
2	bad responder	intronic	ENSCAFG00000002469.4	ENSCAFG00000002469	NANS	ANP32B	chr11	55297913	55297913	T	G	0|1	24,2	0.1	26
2	bad responder	intronic	ENSCAFG00000002477.4	ENSCAFG00000002477	CORO2A	CORO2A	chr11	55361849	55361849	C	G	0|1	22,3	0.235	25
2	bad responder	intronic	ENSCAFG00000002539.4	ENSCAFG00000002539	STX17	STX17	chr11	56912406	56912406	A	T	0|1	22,4	0.182	26
2	bad responder	intronic	ENSCAFG00000002552.5	ENSCAFG00000002552	INVS	INVS	chr11	57148564	57148564	T	C	0/1	14,4	0.214	18
2	bad responder	intronic	ENSCAFG00000002586.4	ENSCAFG00000002586	PLPPR1	PLPPR1	chr11	57817698	57817698	C	T	0/1	27,3	0.143	30
2	bad responder	intergenic	ENSCAFG00000026368.1(dist=47954),ENSCAFG00000027758.2(dist=34205)	ENSCAFG00000026368	-	-	chr11	58913523	58913523	C	T	0/1	8,17	0.685	25
2	bad responder	intergenic	ENSCAFG00000002674.4(dist=38037),ENSCAFG00000030974.1(dist=101890)	ENSCAFG00000002674	-	-	chr11	60319819	60319819	T	C	0/1	24,4	0.208	28
2	bad responder	intronic	ENSCAFG00000002727.4	ENSCAFG00000002727	ABCA1	ABCA1	chr11	60785153	60785153	G	A	0/1	41,9	0.181	50
2	bad responder	intronic	ENSCAFG00000002727.4	ENSCAFG00000002727	ABCA1	ABCA1	chr11	60790480	60790480	T	C	0/1	35,9	0.187	44
2	bad responder	intergenic	ENSCAFG00000047154.1(dist=202977),ENSCAFG00000037818.2(dist=5697)	ENSCAFG00000047154	-	-	chr11	62167331	62167331	G	A	0|1	26,2	0.142	28
2	bad responder	ncRNA_intronic	ENSCAFG00000037818.2	ENSCAFG00000037818	-	-	chr11	62255579	62255579	T	A	0|1	37,3	0.137	40
2	bad responder	ncRNA_intronic	ENSCAFG00000037818.2	ENSCAFG00000037818	-	-	chr11	62255582	62255582	T	A	0|1	36,4	0.138	40
2	bad responder	intronic	ENSCAFG00000002774.5	ENSCAFG00000002774	ZNF462	ZNF462	chr11	62511217	62511217	G	A	0/1	10,19	0.637	29
2	bad responder	downstream	ENSCAFG00000002797.5	ENSCAFG00000002797	KLF4	KLF4	chr11	62882617	62882617	G	A	0/1	18,3	0.198	21
2	bad responder	intronic	ENSCAFG00000002894.6	ENSCAFG00000002894	PALM2AKAP2	-	chr11	64857236	64857236	G	C	0/1	30,3	0.126	33
2	bad responder	intergenic	ENSCAFG00000045097.1(dist=1496),ENSCAFG00000003006.4(dist=2971)	ENSCAFG00000045097	-	-	chr11	66231612	66231612	G	A	0/1	31,5	0.138	36
2	bad responder	intronic	ENSCAFG00000003028.5	ENSCAFG00000003028	HSDL2	HSDL2	chr11	66905011	66905011	C	T	0/1	10,13	0.53	23
2	bad responder	intronic	ENSCAFG00000003043.4	ENSCAFG00000003043	KIAA1958	KIAA1958	chr11	67054154	67054154	T	C	0/1	25,3	0.136	28
2	bad responder	intronic	ENSCAFG00000003282.5	ENSCAFG00000003282	ZNF618	ZNF618	chr11	68218303	68218303	T	G	0/1	16,3	0.187	19
2	bad responder	intronic	ENSCAFG00000003327.5	ENSCAFG00000003327	COL27A1	COL27A1	chr11	68495508	68495508	C	T	0/1	18,14	0.478	32
2	bad responder	intronic	ENSCAFG00000003362.4	ENSCAFG00000003362	TNFSF15	TNFSF15	chr11	68902131	68902131	C	G	0/1	38,5	0.156	43
2	bad responder	intronic	ENSCAFG00000003504.5	ENSCAFG00000003504	ASTN2	ASTN2	chr11	71081864	71081864	C	A	0|1	15,3	0.186	18
2	bad responder	intronic	ENSCAFG00000003504.5	ENSCAFG00000003504	ASTN2	ASTN2	chr11	71081865	71081865	T	G	0|1	15,3	0.186	18
2	bad responder	intergenic	ENSCAFG00000003560.4(dist=17864),ENSCAFG00000041931.1(dist=9801)	ENSCAFG00000003560	-	-	chr11	73708063	73708063	C	G	0/1	19,3	0.234	22
2	bad responder	intergenic	ENSCAFG00000040020.2(dist=42688),ENSCAFG00000003608.5(dist=2865)	ENSCAFG00000040020	-	-	chr11	74083557	74083557	C	G	0|1	20,4	0.188	24
2	bad responder	intergenic	ENSCAFG00000003629.4(dist=38758),ENSCAFG00000048660.1(dist=12585)	ENSCAFG00000003629	-	-	chr11	74211568	74211568	C	G	0/1	28,6	0.241	34
2	bad responder	intronic	ENSCAFG00000000771.4	ENSCAFG00000000771	AGPAT1	-	chr12	1561702	1561705	AGAG	-	0/1	13,16	0.551	29
2	bad responder	intergenic	ENSCAFG00000000803.4(dist=43507),ENSCAFG00000000812.4(dist=8655)	ENSCAFG00000000803	-	-	chr12	2212482	2212482	-	G	0/1	29,5	0.198	34
2	bad responder	intergenic	ENSCAFG00000030725.2(dist=58970),ENSCAFG00000000848.5(dist=6286)	ENSCAFG00000030725	-	-	chr12	2497039	2497039	T	A	0/1	15,14	0.458	29
2	bad responder	intergenic	ENSCAFG00000001188.4(dist=22458),ENSCAFG00000001191.5(dist=6945)	ENSCAFG00000001188	-	-	chr12	3108515	3108515	A	C	0|1	11,3	0.308	14
2	bad responder	intergenic	ENSCAFG00000001188.4(dist=22463),ENSCAFG00000001191.5(dist=6940)	ENSCAFG00000001188	-	-	chr12	3108520	3108520	G	T	0|1	13,3	0.267	16
2	bad responder	intronic	ENSCAFG00000001277.4	ENSCAFG00000001277	ANKS1A	ANKS1A	chr12	4221521	4221521	T	A	0|1	34,4	0.138	38
2	bad responder	intergenic	ENSCAFG00000001432.4(dist=7217),ENSCAFG00000001438.4(dist=31026)	ENSCAFG00000001432	-	-	chr12	5986496	5986496	-	T	0/1	12,7	0.375	19
2	bad responder	intergenic	ENSCAFG00000001488.4(dist=69411),ENSCAFG00000037182.2(dist=33793)	ENSCAFG00000001488	-	-	chr12	6756171	6756171	C	T	0/1	14,18	0.581	32
2	bad responder	intronic	ENSCAFG00000001489.4	ENSCAFG00000001489	ZFAND3	ZFAND3	chr12	6931901	6931901	G	T	0|1	20,2	0.175	22
2	bad responder	intronic	ENSCAFG00000001518.5	ENSCAFG00000001518	DNAH8	DNAH8	chr12	7852084	7852084	C	T	0|1	24,3	0.21	27
2	bad responder	intronic	ENSCAFG00000001518.5	ENSCAFG00000001518	DNAH8	DNAH8	chr12	7852087	7852087	A	G	0|1	23,3	0.211	26
2	bad responder	downstream	ENSCAFG00000039160.2	ENSCAFG00000039160	-	-	chr12	8199090	8199090	T	G	0/1	28,6	0.215	34
2	bad responder	intronic	ENSCAFG00000001565.5	ENSCAFG00000001565	DAAM2	DAAM2	chr12	8766024	8766024	G	T	0|1	25,2	0.143	27
2	bad responder	intronic	ENSCAFG00000001565.5	ENSCAFG00000001565	DAAM2	DAAM2	chr12	8766025	8766025	A	C	0|1	25,2	0.143	27
2	bad responder	intronic	ENSCAFG00000001565.5	ENSCAFG00000001565	DAAM2	DAAM2	chr12	8776033	8776033	C	T	0|1	32,4	0.143	36
2	bad responder	intronic	ENSCAFG00000001565.5	ENSCAFG00000001565	DAAM2	DAAM2	chr12	8776034	8776034	A	G	0|1	32,4	0.143	36
2	bad responder	intergenic	ENSCAFG00000041243.1(dist=114514),ENSCAFG00000001571.4(dist=17550)	ENSCAFG00000041243	-	-	chr12	9152117	9152117	G	T	0|1	33,4	0.111	37
2	bad responder	intergenic	ENSCAFG00000041243.1(dist=114517),ENSCAFG00000001571.4(dist=17547)	ENSCAFG00000041243	-	-	chr12	9152120	9152120	A	C	0|1	33,4	0.111	37
2	bad responder	intergenic	ENSCAFG00000001596.4(dist=1659),ENSCAFG00000001597.4(dist=30768)	ENSCAFG00000001596	-	-	chr12	10292784	10292784	A	G	0/1	20,4	0.158	24
2	bad responder	exonic	ENSCAFG00000001985.4	ENSCAFG00000001985	-	NFKBIE	chr12	12669684	12669684	G	A	0/1	24,7	0.208	31
2	bad responder	intergenic	ENSCAFG00000001996.4(dist=54186),ENSCAFG00000045768.1(dist=83883)	ENSCAFG00000001996	-	-	chr12	12876987	12876987	C	A	0|1	17,2	0.176	19
2	bad responder	ncRNA_intronic	ENSCAFG00000045768.1	ENSCAFG00000045768	-	-	chr12	12975357	12975357	T	C	0|1	25,2	0.124	27
2	bad responder	ncRNA_intronic	ENSCAFG00000045768.1	ENSCAFG00000045768	-	-	chr12	12975364	12975364	G	A	0|1	27,2	0.12	29
2	bad responder	intronic	ENSCAFG00000002054.5	ENSCAFG00000002054	ADGRF5	ADGRF5	chr12	15063993	15063993	G	C	0/1	19,9	0.315	28
2	bad responder	ncRNA_exonic	ENSCAFG00000044195.1	ENSCAFG00000044195	-	-	chr12	15513397	15513397	C	T	0/1	22,3	0.158	25
2	bad responder	intergenic	ENSCAFG00000002097.4(dist=11097),ENSCAFG00000002100.4(dist=28022)	ENSCAFG00000002097	-	-	chr12	15888818	15888818	A	T	0|1	28,4	0.154	32
2	bad responder	intergenic	ENSCAFG00000002097.4(dist=11100),ENSCAFG00000002100.4(dist=28019)	ENSCAFG00000002097	-	-	chr12	15888821	15888821	A	T	0|1	28,4	0.154	32
2	bad responder	intergenic	ENSCAFG00000049967.1(dist=79119),ENSCAFG00000044104.1(dist=65499)	ENSCAFG00000049967	-	-	chr12	17929922	17929922	T	G	0|1	7,5	0.455	12
2	bad responder	intergenic	ENSCAFG00000049967.1(dist=79122),ENSCAFG00000044104.1(dist=65496)	ENSCAFG00000049967	-	-	chr12	17929925	17929925	T	A	0|1	7,5	0.455	12
2	bad responder	intronic	ENSCAFG00000002153.3	ENSCAFG00000002153	TFAP2D	TFAP2D	chr12	18461978	18461978	G	A	0/1	15,17	0.5	32
2	bad responder	intergenic	ENSCAFG00000002156.4(dist=271721),ENSCAFG00000046480.1(dist=147971)	ENSCAFG00000002156	-	-	chr12	18844623	18844623	A	C	0|1	27,3	0.13	30
2	bad responder	intronic	ENSCAFG00000002165.4	ENSCAFG00000002165	PKHD1	PKHD1	chr12	19620900	19620900	C	T	0/1	15,3	0.214	18
2	bad responder	intergenic	ENSCAFG00000002196.4(dist=57933),ENSCAFG00000030193.2(dist=16478)	ENSCAFG00000002196	-	-	chr12	20003538	20003538	G	A	0|1	25,3	0.182	28
2	bad responder	intergenic	ENSCAFG00000002196.4(dist=57936),ENSCAFG00000030193.2(dist=16475)	ENSCAFG00000002196	-	-	chr12	20003541	20003541	T	C	0|1	24,3	0.19	27
2	bad responder	intergenic	ENSCAFG00000031682.2(dist=8889),ENSCAFG00000024271.3(dist=28279)	ENSCAFG00000031682	-	-	chr12	20375899	20375899	A	T	0/1	24,2	0.13	26
2	bad responder	intergenic	ENSCAFG00000046663.1(dist=14575),ENSCAFG00000002288.4(dist=92631)	ENSCAFG00000046663	-	-	chr12	20908161	20908161	-	T	0/1	15,9	0.387	24
2	bad responder	intergenic	ENSCAFG00000002322.4(dist=17998),ENSCAFG00000037804.2(dist=47833)	ENSCAFG00000002322	-	-	chr12	21897089	21897089	T	C	0/1	11,3	0.214	14
2	bad responder	intergenic	ENSCAFG00000025946.1(dist=13006),ENSCAFG00000002325.3(dist=27771)	ENSCAFG00000025946	-	-	chr12	22202441	22202441	C	-	0|1	29,6	0.222	35
2	bad responder	intergenic	ENSCAFG00000025946.1(dist=29905),ENSCAFG00000002325.3(dist=10869)	ENSCAFG00000025946	-	-	chr12	22219340	22219343	AGAG	-	0/1	24,2	0.147	26
2	bad responder	intronic	ENSCAFG00000002348.5	ENSCAFG00000002348	COL21A1	COL21A1	chr12	23369480	23369480	A	T	0|1	35,3	0.107	38
2	bad responder	intronic	ENSCAFG00000002348.5	ENSCAFG00000002348	COL21A1	COL21A1	chr12	23369483	23369483	A	T	0|1	35,3	0.107	38
2	bad responder	intergenic	ENSCAFG00000002348.5(dist=21198),ENSCAFG00000028378.1(dist=19699)	ENSCAFG00000002348	-	-	chr12	23550911	23550911	C	T	0/1	19,8	0.263	27
2	bad responder	intronic	ENSCAFG00000002413.5	ENSCAFG00000002413	DST	DST	chr12	23925642	23925642	T	C	0/1	26,3	0.142	29
2	bad responder	intronic	ENSCAFG00000002413.5	ENSCAFG00000002413	DST	DST	chr12	24070579	24070579	T	C	0/1	18,4	0.157	22
2	bad responder	intergenic	ENSCAFG00000023267.3(dist=241053),ENSCAFG00000046197.1(dist=58589)	ENSCAFG00000023267	-	-	chr12	25052977	25052977	A	G	0|1	26,3	0.181	29
2	bad responder	intergenic	ENSCAFG00000023267.3(dist=241056),ENSCAFG00000046197.1(dist=58586)	ENSCAFG00000023267	-	-	chr12	25052980	25052980	C	T	0|1	26,3	0.182	29
2	bad responder	intronic	ENSCAFG00000002470.4	ENSCAFG00000002470	KHDRBS2	KHDRBS2	chr12	25698523	25698523	T	A	0/1	32,4	0.178	36
2	bad responder	intergenic	ENSCAFG00000002473.4(dist=40366),ENSCAFG00000002482.5(dist=516693)	ENSCAFG00000002473	-	-	chr12	26336158	26336158	-	T	0/1	8,11	0.572	19
2	bad responder	intronic	ENSCAFG00000002495.3	ENSCAFG00000002495	-	-	chr12	28158072	28158072	G	T	0/1	20,17	0.48	37
2	bad responder	intergenic	ENSCAFG00000023580.3(dist=36633),ENSCAFG00000022225.1(dist=1232951)	ENSCAFG00000023580	-	-	chr12	28745146	28745146	T	G	0/1	9,12	0.529	21
2	bad responder	intergenic	ENSCAFG00000023580.3(dist=614617),ENSCAFG00000022225.1(dist=654967)	ENSCAFG00000023580	-	-	chr12	29323130	29323130	G	A	0/1	16,4	0.2	20
2	bad responder	intergenic	ENSCAFG00000023580.3(dist=747826),ENSCAFG00000022225.1(dist=521758)	ENSCAFG00000023580	-	-	chr12	29456339	29456339	A	T	0/1	7,14	0.648	21
2	bad responder	intergenic	ENSCAFG00000023580.3(dist=1016988),ENSCAFG00000022225.1(dist=252596)	ENSCAFG00000023580	-	-	chr12	29725501	29725501	A	C	0/1	18,11	0.381	29
2	bad responder	intergenic	ENSCAFG00000023580.3(dist=1078119),ENSCAFG00000022225.1(dist=191465)	ENSCAFG00000023580	-	-	chr12	29786632	29786632	T	A	0/1	16,10	0.411	26
2	bad responder	intergenic	ENSCAFG00000002522.1(dist=249442),ENSCAFG00000023431.4(dist=117149)	ENSCAFG00000002522	-	-	chr12	31223027	31223027	A	G	0|1	16,4	0.188	20
2	bad responder	intronic	ENSCAFG00000023431.4	ENSCAFG00000023431	ADGRB3	ADGRB3	chr12	31822018	31822018	A	G	0/1	15,3	0.198	18
2	bad responder	intronic	ENSCAFG00000023431.4	ENSCAFG00000023431	ADGRB3	ADGRB3	chr12	31929881	31929881	A	C	0/1	14,4	0.231	18
2	bad responder	intronic	ENSCAFG00000002562.5	ENSCAFG00000002562	COL19A1	COL19A1	chr12	32616180	32616180	C	T	0/1	28,6	0.174	34
2	bad responder	intronic	ENSCAFG00000002658.4	ENSCAFG00000002658	SLC17A5	SLC17A5	chr12	35665655	35665655	T	C	0/1	16,4	0.2	20
2	bad responder	intergenic	ENSCAFG00000044946.1(dist=140804),ENSCAFG00000047408.1(dist=14567)	ENSCAFG00000044946	-	-	chr12	36357150	36357150	G	C	0/1	33,2	0.115	35
2	bad responder	intronic	ENSCAFG00000002709.4	ENSCAFG00000002709	FILIP1	FILIP1	chr12	37070319	37070319	G	A	0/1	26,3	0.143	29
2	bad responder	intergenic	ENSCAFG00000024581.3(dist=55988),ENSCAFG00000029538.1(dist=62386)	ENSCAFG00000024581	-	-	chr12	39083310	39083310	T	G	0/1	23,5	0.21	28
2	bad responder	intergenic	ENSCAFG00000029538.1(dist=3893),ENSCAFG00000046366.1(dist=264444)	ENSCAFG00000029538	-	-	chr12	39149695	39149695	T	G	0/1	15,7	0.411	22
2	bad responder	intergenic	ENSCAFG00000046384.1(dist=57136),ENSCAFG00000002793.4(dist=152284)	ENSCAFG00000046384	-	-	chr12	39705108	39705108	T	G	0/1	21,8	0.318	29
2	bad responder	intergenic	ENSCAFG00000046384.1(dist=124773),ENSCAFG00000002793.4(dist=84647)	ENSCAFG00000046384	-	-	chr12	39772745	39772745	G	A	0/1	11,8	0.385	19
2	bad responder	ncRNA_intronic	ENSCAFG00000033942.2	ENSCAFG00000033942	-	-	chr12	40808510	40808510	G	C	0/1	23,2	0.142	25
2	bad responder	intergenic	ENSCAFG00000031894.2(dist=298130),ENSCAFG00000043317.1(dist=62117)	ENSCAFG00000031894	-	-	chr12	42575643	42575643	A	T	0|1	20,3	0.167	23
2	bad responder	intronic	ENSCAFG00000002979.4	ENSCAFG00000002979	CEP162	CEP162	chr12	44475492	44475492	T	C	0/1	23,4	0.143	27
2	bad responder	intergenic	ENSCAFG00000039052.2(dist=13187),ENSCAFG00000042499.1(dist=371798)	ENSCAFG00000039052	-	-	chr12	45947355	45947355	T	G	0/1	27,9	0.292	36
2	bad responder	intergenic	ENSCAFG00000046800.1(dist=40651),ENSCAFG00000003089.5(dist=37776)	ENSCAFG00000046800	-	-	chr12	47908785	47908785	-	A	0/1	13,6	0.312	19
2	bad responder	intergenic	ENSCAFG00000048338.1(dist=64567),ENSCAFG00000003332.4(dist=114736)	ENSCAFG00000048338	-	-	chr12	52022869	52022869	T	G	0/1	19,3	0.199	22
2	bad responder	ncRNA_intronic	ENSCAFG00000042678.1	ENSCAFG00000042678	-	-	chr12	52635591	52635591	A	C	0/1	13,7	0.375	20
2	bad responder	ncRNA_intronic	ENSCAFG00000038094.2	ENSCAFG00000038094	-	-	chr12	53800052	53800052	-	T	0/1	15,6	0.366	21
2	bad responder	intergenic	ENSCAFG00000042926.1(dist=59630),ENSCAFG00000003417.4(dist=90322)	ENSCAFG00000042926	-	-	chr12	54413341	54413341	T	A	0/1	13,3	0.231	16
2	bad responder	intronic	ENSCAFG00000028858.2	ENSCAFG00000028858	FHL5	FHL5	chr12	55058120	55058120	A	C	0/1	11,9	0.437	20
2	bad responder	intronic	ENSCAFG00000028858.2	ENSCAFG00000028858	FHL5	FHL5	chr12	55069516	55069516	G	A	0/1	25,4	0.208	29
2	bad responder	ncRNA_intronic	ENSCAFG00000038908.2	ENSCAFG00000038908	-	-	chr12	56064651	56064651	A	C	0/1	13,14	0.45	27
2	bad responder	ncRNA_intronic	ENSCAFG00000046817.1	ENSCAFG00000046817	-	-	chr12	56780449	56780449	T	A	0|1	26,3	0.167	29
2	bad responder	ncRNA_intronic	ENSCAFG00000046817.1	ENSCAFG00000046817	-	-	chr12	56780466	56780466	T	A	0|1	25,3	0.174	28
2	bad responder	intergenic	ENSCAFG00000041042.1(dist=32347),ENSCAFG00000027263.1(dist=9468)	ENSCAFG00000041042	-	-	chr12	57479399	57479399	T	A	0|1	18,6	0.3	24
2	bad responder	intergenic	ENSCAFG00000041042.1(dist=32348),ENSCAFG00000027263.1(dist=9467)	ENSCAFG00000041042	-	-	chr12	57479400	57479400	T	A	0|1	18,6	0.3	24
2	bad responder	upstream	ENSCAFG00000023253.3	ENSCAFG00000023253	FAXC	FAXC	chr12	57570564	57570564	G	T	0/1	3,11	0.727	14
2	bad responder	intronic	ENSCAFG00000003498.5	ENSCAFG00000003498	USP45	USP45	chr12	57645616	57645616	C	T	0|1	19,3	0.157	22
2	bad responder	intronic	ENSCAFG00000003498.5	ENSCAFG00000003498	USP45	USP45	chr12	57645621	57645621	A	G	0|1	20,3	0.15	23
2	bad responder	intergenic	ENSCAFG00000003533.4(dist=10636),ENSCAFG00000048952.1(dist=111124)	ENSCAFG00000003533	-	-	chr12	58118990	58118990	T	G	0|1	30,4	0.185	34
2	bad responder	intergenic	ENSCAFG00000003554.4(dist=20388),ENSCAFG00000003564.2(dist=116082)	ENSCAFG00000003554	-	-	chr12	58953003	58953003	T	C	0/1	18,3	0.176	21
2	bad responder	intronic	ENSCAFG00000003580.5	ENSCAFG00000003580	GRIK2	GRIK2	chr12	59471064	59471064	A	C	0|1	34,6	0.172	40
2	bad responder	intronic	ENSCAFG00000003580.5	ENSCAFG00000003580	GRIK2	GRIK2	chr12	59471069	59471069	G	T	0|1	34,6	0.172	40
2	bad responder	intronic	ENSCAFG00000028591.2	ENSCAFG00000028591	POPDC3	POPDC3	chr12	62543757	62543757	C	T	0/1	9,18	0.6	27
2	bad responder	intergenic	ENSCAFG00000047626.1(dist=46832),ENSCAFG00000048717.1(dist=36304)	ENSCAFG00000047626	-	-	chr12	63346266	63346266	C	G	0|1	27,5	0.148	32
2	bad responder	intergenic	ENSCAFG00000003701.4(dist=19542),ENSCAFG00000034465.2(dist=21268)	ENSCAFG00000003701	-	-	chr12	63703027	63703027	G	A	0/1	18,17	0.5	35
2	bad responder	intronic	ENSCAFG00000030036.2	ENSCAFG00000030036	PDSS2	PDSS2	chr12	64606105	64606105	G	C	0/1	16,5	0.235	21
2	bad responder	intergenic	ENSCAFG00000003757.5(dist=30081),ENSCAFG00000049750.1(dist=16055)	ENSCAFG00000003757	-	-	chr12	65150913	65150913	C	A	0|1	38,4	0.118	42
2	bad responder	intergenic	ENSCAFG00000003757.5(dist=30086),ENSCAFG00000049750.1(dist=16050)	ENSCAFG00000003757	-	-	chr12	65150918	65150918	T	G	0|1	38,4	0.117	42
2	bad responder	intergenic	ENSCAFG00000003783.4(dist=19948),ENSCAFG00000003784.4(dist=134526)	ENSCAFG00000003783	-	-	chr12	65690146	65690146	T	A	0/1	23,3	0.173	26
2	bad responder	downstream	ENSCAFG00000003804.4	ENSCAFG00000003804	-	-	chr12	66285079	66285079	A	G	0/1	16,3	0.184	19
2	bad responder	intergenic	ENSCAFG00000003846.4(dist=12706),ENSCAFG00000003854.4(dist=98132)	ENSCAFG00000003846	-	-	chr12	66735863	66735863	T	A	0/1	23,4	0.182	27
2	bad responder	intergenic	ENSCAFG00000003905.4(dist=26046),ENSCAFG00000003918.4(dist=13038)	ENSCAFG00000003905	-	-	chr12	67477742	67477742	A	G	0|1	28,4	0.16	32
2	bad responder	intergenic	ENSCAFG00000003905.4(dist=26047),ENSCAFG00000003918.4(dist=13037)	ENSCAFG00000003905	-	-	chr12	67477743	67477743	C	T	0|1	28,4	0.159	32
2	bad responder	intronic	ENSCAFG00000003942.5	ENSCAFG00000003942	REV3L	REV3L	chr12	67936503	67936503	T	A	0|1	18,2	0.125	20
2	bad responder	intronic	ENSCAFG00000003942.5	ENSCAFG00000003942	REV3L	REV3L	chr12	67936506	67936506	T	A	0|1	18,2	0.125	20
2	bad responder	intergenic	ENSCAFG00000042669.1(dist=197685),ENSCAFG00000046594.1(dist=22833)	ENSCAFG00000042669	-	-	chr12	69216156	69216156	T	A	0/1	24,4	0.182	28
2	bad responder	intergenic	ENSCAFG00000043400.1(dist=52055),ENSCAFG00000043632.1(dist=28067)	ENSCAFG00000043400	-	-	chr12	69439943	69439943	A	C	0/1	14,12	0.458	26
2	bad responder	intergenic	ENSCAFG00000049882.1(dist=39215),ENSCAFG00000045581.1(dist=48857)	ENSCAFG00000049882	-	-	chr12	69809079	69809079	G	T	0/1	26,4	0.167	30
2	bad responder	intronic	ENSCAFG00000004054.2	ENSCAFG00000004054	HS3ST5	HS3ST5	chr12	70172526	70172526	T	G	0|1	12,3	0.214	15
2	bad responder	intergenic	ENSCAFG00000047733.1(dist=47483),ENSCAFG00000049015.1(dist=278845)	ENSCAFG00000047733	-	-	chr12	70723896	70723896	A	C	0/1	16,2	0.133	18
2	bad responder	intergenic	ENSCAFG00000037551.2(dist=11323),ENSCAFG00000049770.1(dist=139818)	ENSCAFG00000037551	-	-	chr12	71453104	71453104	C	T	0/1	19,13	0.458	32
2	bad responder	ncRNA_intronic	ENSCAFG00000044021.1	ENSCAFG00000044021	-	-	chr12	72252308	72252308	T	G	0|1	19,2	0.166	21
2	bad responder	ncRNA_intronic	ENSCAFG00000044021.1	ENSCAFG00000044021	-	-	chr12	72252315	72252315	C	A	0|1	21,2	0.158	23
2	bad responder	intergenic	NONE(dist=NONE),ENSCAFG00000000460.4(dist=25092)	NONE(dist=NONE),EN	-	-	chr13	16029	16029	G	T	0/1	57,10	0.145	67
2	bad responder	intronic	ENSCAFG00000000460.4	ENSCAFG00000000460	LAPTM4B	LAPTM4B	chr13	116579	116580	AA	-	0/1	45,4	0.087	49
2	bad responder	intronic	ENSCAFG00000000484.4	ENSCAFG00000000484	STK3	STK3	chr13	691062	691062	A	T	0/1	37,4	0.138	41
2	bad responder	intronic	ENSCAFG00000000507.5	ENSCAFG00000000507	VPS13B	VPS13B	chr13	1396873	1396873	G	C	0/1	12,4	0.231	16
2	bad responder	intronic	ENSCAFG00000000507.5	ENSCAFG00000000507	VPS13B	VPS13B	chr13	1823155	1823155	C	G	0|1	48,4	0.111	52
2	bad responder	intronic	ENSCAFG00000000507.5	ENSCAFG00000000507	VPS13B	VPS13B	chr13	1823158	1823158	C	G	0|1	50,4	0.105	54
2	bad responder	ncRNA_exonic	ENSCAFG00000034248.2	ENSCAFG00000034248	-	-	chr13	2594468	2594468	A	T	0|1	37,4	0.114	41
2	bad responder	ncRNA_exonic	ENSCAFG00000045820.1	ENSCAFG00000045820	-	-	chr13	2779085	2779085	C	A	0|1	29,5	0.159	34
2	bad responder	ncRNA_exonic	ENSCAFG00000045820.1	ENSCAFG00000045820	-	-	chr13	2779090	2779090	T	G	0|1	30,5	0.153	35
2	bad responder	intergenic	ENSCAFG00000030111.2(dist=160559),ENSCAFG00000025578.3(dist=8586)	ENSCAFG00000030111	-	-	chr13	3673125	3673125	T	A	0|1	32,5	0.166	37
2	bad responder	intergenic	ENSCAFG00000030111.2(dist=160562),ENSCAFG00000025578.3(dist=8583)	ENSCAFG00000030111	-	-	chr13	3673128	3673128	T	A	0|1	32,5	0.166	37
2	bad responder	intergenic	ENSCAFG00000000646.1(dist=21947),ENSCAFG00000000649.4(dist=3905)	ENSCAFG00000000646	-	-	chr13	4506098	4506098	C	T	0|1	35,5	0.137	40
2	bad responder	intergenic	ENSCAFG00000000646.1(dist=21952),ENSCAFG00000000649.4(dist=3900)	ENSCAFG00000000646	-	-	chr13	4506103	4506103	A	G	0|1	36,5	0.133	41
2	bad responder	intronic	ENSCAFG00000032147.2	ENSCAFG00000032147	BAALC	BAALC	chr13	4642902	4642902	T	C	0/1	24,8	0.26	32
2	bad responder	intronic	ENSCAFG00000000670.5	ENSCAFG00000000670	RIMS2	RIMS2	chr13	5068377	5068377	T	A	0/1	39,4	0.15	43
2	bad responder	intronic	ENSCAFG00000000670.5	ENSCAFG00000000670	RIMS2	RIMS2	chr13	5373603	5373603	G	C	0|1	34,3	0.109	37
2	bad responder	intergenic	ENSCAFG00000049361.1(dist=359384),ENSCAFG00000000678.5(dist=70340)	ENSCAFG00000049361	-	-	chr13	6266454	6266454	A	T	0/1	14,24	0.621	38
2	bad responder	intergenic	ENSCAFG00000046873.1(dist=67787),ENSCAFG00000000696.4(dist=133156)	ENSCAFG00000046873	-	-	chr13	8478796	8478796	G	A	0/1	13,20	0.583	33
2	bad responder	intergenic	ENSCAFG00000000696.4(dist=53819),ENSCAFG00000000702.4(dist=26143)	ENSCAFG00000000696	-	-	chr13	8808678	8808678	G	A	0|1	31,3	0.138	34
2	bad responder	intergenic	ENSCAFG00000000696.4(dist=53824),ENSCAFG00000000702.4(dist=26138)	ENSCAFG00000000696	-	-	chr13	8808683	8808683	T	C	0|1	31,3	0.138	34
2	bad responder	intergenic	ENSCAFG00000000702.4(dist=46847),ENSCAFG00000000713.4(dist=135248)	ENSCAFG00000000702	-	-	chr13	8934607	8934607	G	A	0/1	45,9	0.2	54
2	bad responder	intergenic	ENSCAFG00000044039.1(dist=62390),ENSCAFG00000000719.4(dist=1783)	ENSCAFG00000044039	-	-	chr13	9814174	9814174	T	A	0|1	41,2	0.091	43
2	bad responder	intergenic	ENSCAFG00000044039.1(dist=62393),ENSCAFG00000000719.4(dist=1780)	ENSCAFG00000044039	-	-	chr13	9814177	9814177	T	A	0|1	41,2	0.088	43
2	bad responder	intronic	ENSCAFG00000024786.4	ENSCAFG00000024786	PKHD1L1	PKHD1L1	chr13	9941342	9941342	T	C	0/1	25,4	0.136	29
2	bad responder	intergenic	ENSCAFG00000041035.1(dist=109174),ENSCAFG00000042426.1(dist=52619)	ENSCAFG00000041035	-	-	chr13	11352132	11352132	A	G	0/1	22,11	0.333	33
2	bad responder	intergenic	ENSCAFG00000000749.4(dist=250552),ENSCAFG00000028960.1(dist=411153)	ENSCAFG00000000749	-	-	chr13	11929719	11929719	G	A	0/1	24,10	0.28	34
2	bad responder	intergenic	ENSCAFG00000028960.1(dist=21982),ENSCAFG00000000786.5(dist=38157)	ENSCAFG00000028960	-	-	chr13	12363408	12363408	C	G	0/1	50,7	0.163	57
2	bad responder	intronic	ENSCAFG00000000786.5	ENSCAFG00000000786	CSMD3	CSMD3	chr13	13312924	13312924	C	A	0/1	11,29	0.655	40
2	bad responder	intronic	ENSCAFG00000000786.5	ENSCAFG00000000786	CSMD3	CSMD3	chr13	13410258	13410258	A	G	0/1	12,27	0.643	39
2	bad responder	intergenic	ENSCAFG00000031982.1(dist=112131),ENSCAFG00000043806.1(dist=141845)	ENSCAFG00000031982	-	-	chr13	13942682	13942682	G	C	0/1	20,15	0.435	35
2	bad responder	intergenic	ENSCAFG00000043806.1(dist=265808),ENSCAFG00000028440.2(dist=397833)	ENSCAFG00000043806	-	-	chr13	14352556	14352556	A	C	0/1	20,22	0.567	42
2	bad responder	intergenic	ENSCAFG00000048833.1(dist=21650),ENSCAFG00000041147.1(dist=25929)	ENSCAFG00000048833	-	-	chr13	15332192	15332192	A	C	0/1	40,6	0.171	46
2	bad responder	intergenic	ENSCAFG00000048833.1(dist=21651),ENSCAFG00000041147.1(dist=25928)	ENSCAFG00000048833	-	-	chr13	15332193	15332193	G	T	0/1	38,7	0.171	45
2	bad responder	intronic	ENSCAFG00000000816.5	ENSCAFG00000000816	EIF3H	EIF3H	chr13	16154541	16154541	C	T	0/1	24,3	0.143	27
2	bad responder	intergenic	ENSCAFG00000000826.4(dist=54796),ENSCAFG00000049074.1(dist=43798)	ENSCAFG00000000826	-	-	chr13	17004091	17004091	C	G	0/1	34,5	0.199	39
2	bad responder	ncRNA_intronic	ENSCAFG00000049074.1	ENSCAFG00000049074	-	-	chr13	17060546	17060546	G	A	0|1	40,4	0.156	44
2	bad responder	ncRNA_intronic	ENSCAFG00000049074.1	ENSCAFG00000049074	-	-	chr13	17060547	17060547	T	C	0|1	40,4	0.156	44
2	bad responder	intronic	ENSCAFG00000000957.4	ENSCAFG00000000957	SNTB1	SNTB1	chr13	19512111	19512111	A	T	0/1	12,11	0.474	23
2	bad responder	ncRNA_intronic	ENSCAFG00000040206.2	ENSCAFG00000040206	-	-	chr13	20538277	20538277	G	A	0|1	23,3	0.15	26
2	bad responder	intergenic	ENSCAFG00000042356.1(dist=110799),ENSCAFG00000049832.1(dist=42834)	ENSCAFG00000042356	-	-	chr13	20862303	20862303	A	T	0|1	25,2	0.129	27
2	bad responder	intergenic	ENSCAFG00000042356.1(dist=110800),ENSCAFG00000049832.1(dist=42833)	ENSCAFG00000042356	-	-	chr13	20862304	20862304	A	T	0|1	25,2	0.129	27
2	bad responder	intergenic	ENSCAFG00000042356.1(dist=124077),ENSCAFG00000049832.1(dist=29556)	ENSCAFG00000042356	-	-	chr13	20875581	20875581	A	G	0/1	24,4	0.143	28
2	bad responder	intergenic	ENSCAFG00000049832.1(dist=20969),ENSCAFG00000022374.2(dist=18397)	ENSCAFG00000049832	-	-	chr13	20926764	20926764	A	G	0/1	9,35	0.75	44
2	bad responder	intronic	ENSCAFG00000000974.4	ENSCAFG00000000974	DERL1	DERL1	chr13	21457095	21457095	G	A	0/1	18,27	0.576	45
2	bad responder	intronic	ENSCAFG00000000997.4	ENSCAFG00000000997	FAM83A	FAM83A	chr13	21586355	21586355	G	C	0|1	36,4	0.138	40
2	bad responder	intronic	ENSCAFG00000000997.4	ENSCAFG00000000997	FAM83A	FAM83A	chr13	21586356	21586356	G	C	0|1	36,4	0.138	40
2	bad responder	intronic	ENSCAFG00000025273.4	ENSCAFG00000025273	TMEM65	TMEM65	chr13	22460493	22460493	C	A	0|1	44,4	0.118	48
2	bad responder	intronic	ENSCAFG00000025273.4	ENSCAFG00000025273	TMEM65	TMEM65	chr13	22460498	22460498	T	G	0|1	45,4	0.118	49
2	bad responder	intronic	ENSCAFG00000029985.2	ENSCAFG00000029985	RNF139	RNF139	chr13	22555009	22555009	A	T	0|1	36,3	0.099	39
2	bad responder	intronic	ENSCAFG00000029985.2	ENSCAFG00000029985	RNF139	RNF139	chr13	22555014	22555014	A	T	0|1	36,3	0.096	39
2	bad responder	intronic	ENSCAFG00000047342.1	ENSCAFG00000047342	NSMCE2	NSMCE2	chr13	23206719	23206719	G	A	0|1	34,3	0.107	37
2	bad responder	intronic	ENSCAFG00000047342.1	ENSCAFG00000047342	NSMCE2	NSMCE2	chr13	23206722	23206722	T	C	0|1	34,3	0.111	37
2	bad responder	intergenic	ENSCAFG00000001077.4(dist=15957),ENSCAFG00000030361.1(dist=135280)	ENSCAFG00000001077	-	-	chr13	23362261	23362261	G	A	0/1	31,6	0.206	37
2	bad responder	intergenic	ENSCAFG00000039697.2(dist=16245),ENSCAFG00000044835.1(dist=23320)	ENSCAFG00000039697	-	-	chr13	25172022	25172022	A	T	0/1	40,3	0.118	43
2	bad responder	intergenic	ENSCAFG00000001086.4(dist=41999),ENSCAFG00000035602.2(dist=1758)	ENSCAFG00000001086	-	-	chr13	25247308	25247308	C	G	0|1	39,5	0.161	44
2	bad responder	intergenic	ENSCAFG00000001086.4(dist=42002),ENSCAFG00000035602.2(dist=1755)	ENSCAFG00000001086	-	-	chr13	25247311	25247311	C	G	0|1	39,5	0.161	44
2	bad responder	intergenic	ENSCAFG00000045587.1(dist=49967),ENSCAFG00000037184.2(dist=576124)	ENSCAFG00000045587	-	-	chr13	25707964	25707975	GAGGAGATAGAG	-	0/1	11,16	0.565	27
2	bad responder	intergenic	ENSCAFG00000045587.1(dist=205217),ENSCAFG00000037184.2(dist=420885)	ENSCAFG00000045587	-	-	chr13	25863214	25863214	C	A	0|1	35,2	0.115	37
2	bad responder	intergenic	ENSCAFG00000045587.1(dist=205218),ENSCAFG00000037184.2(dist=420884)	ENSCAFG00000045587	-	-	chr13	25863215	25863215	T	G	0|1	35,2	0.115	37
2	bad responder	intergenic	ENSCAFG00000045587.1(dist=258611),ENSCAFG00000037184.2(dist=367491)	ENSCAFG00000045587	-	-	chr13	25916608	25916608	A	T	0|1	36,4	0.167	40
2	bad responder	intergenic	ENSCAFG00000045587.1(dist=569848),ENSCAFG00000037184.2(dist=56254)	ENSCAFG00000045587	-	-	chr13	26227845	26227845	A	T	0|1	30,6	0.214	36
2	bad responder	intergenic	ENSCAFG00000037037.2(dist=180508),ENSCAFG00000001087.4(dist=45566)	ENSCAFG00000037037	-	-	chr13	26861554	26861554	A	G	0/1	26,3	0.136	29
2	bad responder	intronic	ENSCAFG00000001096.4	ENSCAFG00000001096	ASAP1	ASAP1	chr13	27239752	27239752	G	T	0|1	45,5	0.114	50
2	bad responder	intronic	ENSCAFG00000001097.5	ENSCAFG00000001097	ADCY8	ADCY8	chr13	27775979	27775979	T	C	0|1	40,3	0.117	43
2	bad responder	intronic	ENSCAFG00000001097.5	ENSCAFG00000001097	ADCY8	ADCY8	chr13	27775980	27775980	G	A	0|1	40,3	0.117	43
2	bad responder	intergenic	ENSCAFG00000001098.2(dist=164437),ENSCAFG00000001100.4(dist=101564)	ENSCAFG00000001098	-	-	chr13	28469393	28469393	A	G	0/1	25,14	0.379	39
2	bad responder	intergenic	ENSCAFG00000001124.6(dist=9461),ENSCAFG00000001128.5(dist=4604)	ENSCAFG00000001124	-	-	chr13	29346084	29346084	T	A	0|1	41,3	0.091	44
2	bad responder	exonic	ENSCAFG00000001131.4	ENSCAFG00000001131	SLA	SLA	chr13	29516081	29516081	A	T	0/1	52,4	0.108	56
2	bad responder	intergenic	ENSCAFG00000001128.5(dist=21069),ENSCAFG00000001133.5(dist=29530)	ENSCAFG00000001128	-	-	chr13	29619109	29619109	G	C	0/1	40,4	0.094	44
2	bad responder	intergenic	ENSCAFG00000046650.1(dist=179444),ENSCAFG00000039660.2(dist=5257)	ENSCAFG00000046650	-	-	chr13	30438275	30438275	A	G	0|1	35,4	0.159	39
2	bad responder	intergenic	ENSCAFG00000046650.1(dist=179445),ENSCAFG00000039660.2(dist=5256)	ENSCAFG00000046650	-	-	chr13	30438276	30438276	C	T	0|1	35,4	0.159	39
2	bad responder	intergenic	ENSCAFG00000047607.1(dist=100405),ENSCAFG00000048243.1(dist=94100)	ENSCAFG00000047607	-	-	chr13	31192630	31192630	C	G	0/1	31,4	0.148	35
2	bad responder	ncRNA_intronic	ENSCAFG00000048243.1	ENSCAFG00000048243	-	-	chr13	31301187	31301187	T	A	0|1	29,4	0.192	33
2	bad responder	ncRNA_intronic	ENSCAFG00000048243.1	ENSCAFG00000048243	-	-	chr13	31301194	31301194	T	A	0|1	31,4	0.185	35
2	bad responder	intronic	ENSCAFG00000001166.4	ENSCAFG00000001166	KHDRBS3	KHDRBS3	chr13	31527515	31527515	T	-	0/1	6,9	0.504	15
2	bad responder	intergenic	ENSCAFG00000033822.2(dist=98424),ENSCAFG00000047036.1(dist=18318)	ENSCAFG00000033822	-	-	chr13	31790018	31790018	C	A	0/1	16,15	0.606	31
2	bad responder	intronic	ENSCAFG00000001173.4	ENSCAFG00000001173	FAM135B	FAM135B	chr13	33531326	33531326	A	G	0/1	25,13	0.332	38
2	bad responder	intergenic	ENSCAFG00000001173.4(dist=17464),ENSCAFG00000041569.1(dist=128580)	ENSCAFG00000001173	-	-	chr13	33596684	33596684	G	A	0/1	32,3	0.13	35
2	bad responder	intronic	ENSCAFG00000001178.5	ENSCAFG00000001178	COL22A1	-	chr13	33742972	33742972	A	T	0/1	42,4	0.127	46
2	bad responder	intergenic	ENSCAFG00000046652.1(dist=10309),ENSCAFG00000039268.2(dist=26963)	ENSCAFG00000046652	-	-	chr13	34524368	34524368	C	T	0/1	35,7	0.212	42
2	bad responder	intergenic	ENSCAFG00000001181.4(dist=21739),ENSCAFG00000045613.1(dist=6503)	ENSCAFG00000001181	-	-	chr13	35137233	35137233	C	A	0/1	34,2	0.111	36
2	bad responder	intergenic	ENSCAFG00000001196.4(dist=3065),ENSCAFG00000034256.2(dist=10268)	ENSCAFG00000001196	-	-	chr13	35271642	35271642	-	C	0/1	22,3	0.2	25
2	bad responder	intergenic	ENSCAFG00000046086.1(dist=2106),ENSCAFG00000001237.4(dist=7858)	ENSCAFG00000046086	-	-	chr13	35872147	35872147	C	A	0/1	30,4	0.123	34
2	bad responder	ncRNA_intronic	ENSCAFG00000047969.1	ENSCAFG00000047969	-	-	chr13	36040800	36040800	G	A	0/1	50,5	0.094	55
2	bad responder	intergenic	ENSCAFG00000043694.1(dist=4655),ENSCAFG00000047843.1(dist=12870)	ENSCAFG00000043694	-	-	chr13	36262223	36262223	G	C	0/1	37,4	0.147	41
2	bad responder	intergenic	ENSCAFG00000024408.3(dist=3807),ENSCAFG00000042440.1(dist=60597)	ENSCAFG00000024408	-	-	chr13	36805830	36805830	C	G	0/1	31,3	0.119	34
2	bad responder	intergenic	ENSCAFG00000028397.1(dist=4487),ENSCAFG00000001804.4(dist=35135)	ENSCAFG00000028397	-	-	chr13	39323472	39323472	A	C	0|1	35,3	0.121	38
2	bad responder	intergenic	ENSCAFG00000028397.1(dist=4488),ENSCAFG00000001804.4(dist=35134)	ENSCAFG00000028397	-	-	chr13	39323473	39323473	G	T	0|1	35,3	0.121	38
2	bad responder	intergenic	ENSCAFG00000021216.1(dist=134211),ENSCAFG00000024975.2(dist=37727)	ENSCAFG00000021216	-	-	chr13	39729192	39729192	G	C	0|1	36,4	0.161	40
2	bad responder	intergenic	ENSCAFG00000035291.2(dist=129344),ENSCAFG00000048175.1(dist=69483)	ENSCAFG00000035291	-	-	chr13	40187425	40187425	C	A	0|1	26,4	0.2	30
2	bad responder	intergenic	ENSCAFG00000035291.2(dist=129345),ENSCAFG00000048175.1(dist=69482)	ENSCAFG00000035291	-	-	chr13	40187426	40187426	T	G	0|1	26,4	0.2	30
2	bad responder	intronic	ENSCAFG00000001828.4	ENSCAFG00000001828	KCTD8	KCTD8	chr13	40911353	40911353	C	T	0/1	18,3	0.174	21
2	bad responder	intergenic	ENSCAFG00000001828.4(dist=16862),ENSCAFG00000001830.3(dist=134753)	ENSCAFG00000001828	-	-	chr13	40994831	40994831	A	G	0/1	26,7	0.237	33
2	bad responder	intergenic	ENSCAFG00000001832.5(dist=1212),ENSCAFG00000049340.1(dist=13082)	ENSCAFG00000001832	-	-	chr13	41166056	41166056	C	T	0/1	23,10	0.36	33
2	bad responder	intergenic	ENSCAFG00000030386.1(dist=54670),ENSCAFG00000027340.2(dist=3824)	ENSCAFG00000030386	-	-	chr13	41856934	41856934	A	T	0/1	29,9	0.226	38
2	bad responder	intronic	ENSCAFG00000001903.4	ENSCAFG00000001903	ATP10D	ATP10D	chr13	43422052	43422052	C	A	0|1	33,6	0.172	39
2	bad responder	intronic	ENSCAFG00000001903.4	ENSCAFG00000001903	ATP10D	ATP10D	chr13	43422053	43422053	T	G	0|1	33,6	0.172	39
2	bad responder	intronic	ENSCAFG00000031803.2	ENSCAFG00000031803	NIPAL1	NIPAL1	chr13	43890499	43890499	-	T	0/1	17,14	0.384	31
2	bad responder	intronic	ENSCAFG00000024651.3	ENSCAFG00000024651	LRRC66	LRRC66	chr13	44950725	44950725	A	T	0/1	56,5	0.088	61
2	bad responder	intronic	ENSCAFG00000002031.4	ENSCAFG00000002031	SCFD2	SCFD2	chr13	45973700	45973700	G	C	0|1	39,4	0.156	43
2	bad responder	intergenic	ENSCAFG00000002039.4(dist=157360),ENSCAFG00000047220.1(dist=80494)	ENSCAFG00000002039	-	-	chr13	46344365	46344365	G	C	0|1	47,4	0.143	51
2	bad responder	intergenic	ENSCAFG00000002039.4(dist=157361),ENSCAFG00000047220.1(dist=80493)	ENSCAFG00000002039	-	-	chr13	46344366	46344366	G	C	0|1	47,4	0.143	51
2	bad responder	intergenic	ENSCAFG00000047220.1(dist=35233),ENSCAFG00000041179.1(dist=25273)	ENSCAFG00000047220	-	-	chr13	46494556	46494556	A	T	0|1	36,3	0.118	39
2	bad responder	intergenic	ENSCAFG00000002052.5(dist=40602),ENSCAFG00000002057.4(dist=48555)	ENSCAFG00000002052	-	-	chr13	46682148	46682148	G	A	0/1	22,3	0.158	25
2	bad responder	intergenic	ENSCAFG00000002090.4(dist=11578),ENSCAFG00000002094.4(dist=4186)	ENSCAFG00000002090	-	-	chr13	47654144	47654144	G	T	0|1	30,6	0.23	36
2	bad responder	intergenic	ENSCAFG00000002090.4(dist=11579),ENSCAFG00000002094.4(dist=4185)	ENSCAFG00000002090	-	-	chr13	47654145	47654145	A	C	0|1	30,6	0.23	36
2	bad responder	intergenic	ENSCAFG00000032445.2(dist=48958),ENSCAFG00000045001.1(dist=40247)	ENSCAFG00000032445	-	-	chr13	47942879	47942879	A	T	0|1	49,3	0.088	52
2	bad responder	intergenic	ENSCAFG00000032445.2(dist=48961),ENSCAFG00000045001.1(dist=40244)	ENSCAFG00000032445	-	-	chr13	47942882	47942882	A	T	0|1	48,3	0.091	51
2	bad responder	intergenic	ENSCAFG00000045001.1(dist=28321),ENSCAFG00000042483.1(dist=16130)	ENSCAFG00000045001	-	-	chr13	48013229	48013229	G	A	0|1	30,2	0.12	32
2	bad responder	intergenic	ENSCAFG00000045001.1(dist=28322),ENSCAFG00000042483.1(dist=16129)	ENSCAFG00000045001	-	-	chr13	48013230	48013230	T	C	0|1	31,2	0.115	33
2	bad responder	intergenic	ENSCAFG00000031330.2(dist=63453),ENSCAFG00000024171.3(dist=22039)	ENSCAFG00000031330	-	-	chr13	48922096	48922096	C	G	0/1	24,3	0.149	27
2	bad responder	intergenic	ENSCAFG00000024171.3(dist=66296),ENSCAFG00000022253.2(dist=5607)	ENSCAFG00000024171	-	-	chr13	49031127	49031127	C	T	0|1	37,3	0.096	40
2	bad responder	intergenic	ENSCAFG00000024171.3(dist=66301),ENSCAFG00000022253.2(dist=5602)	ENSCAFG00000024171	-	-	chr13	49031132	49031132	A	G	0|1	36,4	0.1	40
2	bad responder	intronic	ENSCAFG00000002330.4	ENSCAFG00000002330	IGFBP7	IGFBP7	chr13	49146042	49146042	A	C	0|1	30,4	0.16	34
2	bad responder	intronic	ENSCAFG00000002330.4	ENSCAFG00000002330	IGFBP7	IGFBP7	chr13	49146047	49146047	G	T	0|1	30,4	0.159	34
2	bad responder	intergenic	ENSCAFG00000046481.1(dist=85940),ENSCAFG00000026272.1(dist=236011)	ENSCAFG00000046481	-	-	chr13	51219647	51219647	C	A	0/1	22,3	0.155	25
2	bad responder	intronic	ENSCAFG00000002364.5	ENSCAFG00000002364	ADGRL3	ADGRL3	chr13	53381872	53381872	G	C	0/1	20,18	0.423	38
2	bad responder	intergenic	ENSCAFG00000002364.5(dist=221955),ENSCAFG00000036266.2(dist=70747)	ENSCAFG00000002364	-	-	chr13	53760580	53760580	A	G	0/1	23,15	0.433	38
2	bad responder	intergenic	ENSCAFG00000044376.1(dist=8845),ENSCAFG00000002714.5(dist=301849)	ENSCAFG00000044376	-	-	chr13	55756951	55756951	G	A	0/1	17,24	0.581	41
2	bad responder	intronic	ENSCAFG00000002714.5	ENSCAFG00000002714	EPHA5	EPHA5	chr13	56248467	56248467	A	T	0/1	34,4	0.148	38
2	bad responder	intergenic	ENSCAFG00000039201.2(dist=690645),ENSCAFG00000045206.1(dist=159410)	ENSCAFG00000039201	-	-	chr13	57174975	57174975	G	T	0/1	27,13	0.296	40
2	bad responder	intergenic	ENSCAFG00000045206.1(dist=104116),ENSCAFG00000028004.2(dist=124063)	ENSCAFG00000045206	-	-	chr13	57439070	57439070	G	C	0|1	14,4	0.25	18
2	bad responder	intergenic	ENSCAFG00000045146.1(dist=4766),ENSCAFG00000002765.4(dist=18109)	ENSCAFG00000045146	-	-	chr13	57995103	57995103	A	G	0/1	13,15	0.579	28
2	bad responder	intergenic	ENSCAFG00000002808.4(dist=36641),ENSCAFG00000028617.2(dist=11071)	ENSCAFG00000002808	-	-	chr13	58701530	58701530	C	T	0/1	28,7	0.207	35
2	bad responder	intergenic	ENSCAFG00000029376.2(dist=2787),ENSCAFG00000029232.3(dist=13093)	ENSCAFG00000029376	-	-	chr13	58935700	58935700	G	A	0/1	29,8	0.258	37
2	bad responder	intergenic	ENSCAFG00000002878.4(dist=13771),ENSCAFG00000036784.2(dist=31200)	ENSCAFG00000002878	-	-	chr13	59357702	59357702	C	A	0|1	34,4	0.148	38
2	bad responder	intergenic	ENSCAFG00000002878.4(dist=13772),ENSCAFG00000036784.2(dist=31199)	ENSCAFG00000002878	-	-	chr13	59357703	59357703	T	G	0|1	34,4	0.148	38
2	bad responder	intergenic	ENSCAFG00000002931.4(dist=79511),ENSCAFG00000002939.6(dist=12947)	ENSCAFG00000002931	-	-	chr13	60315189	60315189	A	C	0|1	45,3	0.088	48
2	bad responder	intergenic	ENSCAFG00000002931.4(dist=79514),ENSCAFG00000002939.6(dist=12944)	ENSCAFG00000002931	-	-	chr13	60315192	60315192	G	T	0|1	45,3	0.088	48
2	bad responder	intronic	ENSCAFG00000002939.6	ENSCAFG00000002939	SLC4A4	SLC4A4	chr13	60547766	60547766	G	A	0|1	44,2	0.093	46
2	bad responder	intronic	ENSCAFG00000002939.6	ENSCAFG00000002939	SLC4A4	SLC4A4	chr13	60547767	60547767	T	C	0|1	44,2	0.094	46
2	bad responder	intergenic	ENSCAFG00000041373.1(dist=36238),ENSCAFG00000027761.1(dist=4372)	ENSCAFG00000041373	-	-	chr13	63226073	63226073	T	G	0/1	25,8	0.24	33
2	bad responder	intergenic	ENSCAFG00000006267.4(dist=52361),ENSCAFG00000042443.1(dist=39307)	ENSCAFG00000006267	-	-	chr14	84254	84254	G	A	0/1	44,5	0.143	49
2	bad responder	intergenic	ENSCAFG00000042443.1(dist=236541),ENSCAFG00000048164.1(dist=101668)	ENSCAFG00000042443	-	-	chr14	364835	364835	C	T	0/1	53,15	0.213	68
2	bad responder	intergenic	ENSCAFG00000031441.2(dist=7879),ENSCAFG00000042301.1(dist=4557)	ENSCAFG00000031441	-	-	chr14	967174	967174	T	G	0|1	27,2	0.142	29
2	bad responder	intergenic	ENSCAFG00000031441.2(dist=7882),ENSCAFG00000042301.1(dist=4554)	ENSCAFG00000031441	-	-	chr14	967177	967177	C	A	0|1	27,2	0.143	29
2	bad responder	intergenic	ENSCAFG00000001184.4(dist=28204),ENSCAFG00000025389.3(dist=20469)	ENSCAFG00000001184	-	-	chr14	1036333	1036333	A	G	0|1	26,4	0.166	30
2	bad responder	intergenic	ENSCAFG00000028629.1(dist=55620),ENSCAFG00000048824.1(dist=25371)	ENSCAFG00000028629	-	-	chr14	1475931	1475931	T	G	0|1	17,3	0.217	20
2	bad responder	intergenic	ENSCAFG00000034233.2(dist=148113),ENSCAFG00000001242.4(dist=197309)	ENSCAFG00000034233	-	-	chr14	1796406	1796406	G	C	0/1	23,15	0.387	38
2	bad responder	intergenic	ENSCAFG00000001242.4(dist=51248),ENSCAFG00000031134.1(dist=5326)	ENSCAFG00000001242	-	-	chr14	2045901	2045901	C	T	0/1	16,15	0.5	31
2	bad responder	intergenic	ENSCAFG00000046478.1(dist=29181),ENSCAFG00000001267.2(dist=6568)	ENSCAFG00000046478	-	-	chr14	2644127	2644127	T	C	0/1	40,5	0.139	45
2	bad responder	intergenic	ENSCAFG00000043678.1(dist=27509),ENSCAFG00000045452.1(dist=26726)	ENSCAFG00000043678	-	-	chr14	2939087	2939087	A	G	0/1	14,3	0.2	17
2	bad responder	intronic	ENSCAFG00000001306.5	ENSCAFG00000001306	LRGUK	LRGUK	chr14	3281133	3281133	G	A	0|1	9,4	0.333	13
2	bad responder	intronic	ENSCAFG00000001362.4	ENSCAFG00000001362	PLXNA4	PLXNA4	chr14	4818703	4818703	A	C	0|1	5,2	0.286	7
2	bad responder	intronic	ENSCAFG00000001362.4	ENSCAFG00000001362	PLXNA4	PLXNA4	chr14	4818706	4818706	G	T	0|1	5,2	0.286	7
2	bad responder	intronic	ENSCAFG00000001362.4	ENSCAFG00000001362	PLXNA4	PLXNA4	chr14	4896971	4896971	A	C	0|1	30,5	0.148	35
2	bad responder	intronic	ENSCAFG00000001362.4	ENSCAFG00000001362	PLXNA4	PLXNA4	chr14	4896972	4896972	G	T	0|1	30,5	0.147	35
2	bad responder	intronic	ENSCAFG00000001362.4	ENSCAFG00000001362	PLXNA4	PLXNA4	chr14	4897433	4897433	A	T	0|1	36,6	0.142	42
2	bad responder	intronic	ENSCAFG00000001362.4	ENSCAFG00000001362	PLXNA4	PLXNA4	chr14	4897436	4897436	A	T	0|1	36,6	0.143	42
2	bad responder	intergenic	ENSCAFG00000001362.4(dist=32717),ENSCAFG00000048011.1(dist=68671)	ENSCAFG00000001362	-	-	chr14	5135767	5135767	A	G	0/1	19,4	0.187	23
2	bad responder	intergenic	ENSCAFG00000001362.4(dist=47258),ENSCAFG00000048011.1(dist=54130)	ENSCAFG00000001362	-	-	chr14	5150308	5150308	G	C	0|1	25,3	0.136	28
2	bad responder	intergenic	ENSCAFG00000001362.4(dist=47259),ENSCAFG00000048011.1(dist=54129)	ENSCAFG00000001362	-	-	chr14	5150309	5150309	G	C	0|1	25,3	0.136	28
2	bad responder	intergenic	ENSCAFG00000001406.4(dist=59584),ENSCAFG00000046028.1(dist=96367)	ENSCAFG00000001406	-	-	chr14	5859417	5859417	A	G	0/1	19,3	0.176	22
2	bad responder	intronic	ENSCAFG00000001426.4	ENSCAFG00000001426	COPG2	COPG2	chr14	6340291	6340291	T	C	0/1	22,4	0.165	26
2	bad responder	intronic	ENSCAFG00000001505.4	ENSCAFG00000001505	UBE2H	UBE2H	chr14	6941482	6941482	G	C	0/1	14,3	0.221	17
2	bad responder	intronic	ENSCAFG00000001505.4	ENSCAFG00000001505	UBE2H	UBE2H	chr14	7013451	7013451	A	T	0|1	24,3	0.19	27
2	bad responder	intronic	ENSCAFG00000001505.4	ENSCAFG00000001505	UBE2H	UBE2H	chr14	7013452	7013452	A	T	0|1	24,3	0.19	27
2	bad responder	intronic	ENSCAFG00000001505.4	ENSCAFG00000001505	UBE2H	UBE2H	chr14	7015236	7015236	C	-	0/1	25,12	0.357	37
2	bad responder	intergenic	ENSCAFG00000001730.3(dist=42207),ENSCAFG00000043373.1(dist=77583)	ENSCAFG00000001730	-	-	chr14	8784229	8784229	A	G	0|1	13,4	0.214	17
2	bad responder	intergenic	ENSCAFG00000001730.3(dist=42208),ENSCAFG00000043373.1(dist=77582)	ENSCAFG00000001730	-	-	chr14	8784230	8784230	C	T	0|1	13,4	0.214	17
2	bad responder	intronic	ENSCAFG00000001738.5	ENSCAFG00000001738	GRM8	GRM8	chr14	9036647	9036647	A	G	0/1	23,8	0.25	31
2	bad responder	intronic	ENSCAFG00000001738.5	ENSCAFG00000001738	GRM8	GRM8	chr14	9530011	9530011	C	T	0/1	17,3	0.186	20
2	bad responder	intronic	ENSCAFG00000001738.5	ENSCAFG00000001738	GRM8	GRM8	chr14	9551627	9551627	A	G	0/1	18,4	0.175	22
2	bad responder	intronic	ENSCAFG00000001738.5	ENSCAFG00000001738	GRM8	GRM8	chr14	9573965	9573965	C	T	0/1	21,4	0.136	25
2	bad responder	intergenic	ENSCAFG00000021618.1(dist=90380),ENSCAFG00000001744.4(dist=3533)	ENSCAFG00000021618	-	-	chr14	10147777	10147777	G	A	0/1	22,12	0.44	34
2	bad responder	intergenic	ENSCAFG00000001747.4(dist=6893),ENSCAFG00000001754.4(dist=99019)	ENSCAFG00000001747	-	-	chr14	10888475	10888475	G	C	0/1	11,3	0.271	14
2	bad responder	intergenic	ENSCAFG00000001762.3(dist=15475),ENSCAFG00000046222.1(dist=19222)	ENSCAFG00000001762	-	-	chr14	11663499	11663499	T	-	0/1	6,14	0.647	20
2	bad responder	intergenic	ENSCAFG00000049574.1(dist=12690),ENSCAFG00000001790.5(dist=266822)	ENSCAFG00000049574	-	-	chr14	12713358	12713358	G	A	0/1	11,12	0.5	23
2	bad responder	intergenic	ENSCAFG00000001808.4(dist=8099),ENSCAFG00000001819.4(dist=83008)	ENSCAFG00000001808	-	-	chr14	13253418	13253418	T	C	0/1	14,3	0.199	17
2	bad responder	intergenic	ENSCAFG00000047791.1(dist=155318),ENSCAFG00000025955.1(dist=9895)	ENSCAFG00000047791	-	-	chr14	14574228	14574228	G	T	0|1	17,3	0.235	20
2	bad responder	intergenic	ENSCAFG00000001857.4(dist=47976),ENSCAFG00000001862.4(dist=43816)	ENSCAFG00000001857	-	-	chr14	14701932	14701932	G	A	0/1	23,6	0.261	29
2	bad responder	intronic	ENSCAFG00000001862.4	ENSCAFG00000001862	ZNF804B	ZNF804B	chr14	14860456	14860456	T	A	0/1	11,8	0.437	19
2	bad responder	intronic	ENSCAFG00000001862.4	ENSCAFG00000001862	ZNF804B	ZNF804B	chr14	15080398	15080398	T	A	0|1	38,2	0.1	40
2	bad responder	intronic	ENSCAFG00000001862.4	ENSCAFG00000001862	ZNF804B	ZNF804B	chr14	15171160	15171160	G	C	0|1	32,3	0.148	35
2	bad responder	intronic	ENSCAFG00000001862.4	ENSCAFG00000001862	ZNF804B	ZNF804B	chr14	15171165	15171165	A	C	0|1	28,3	0.167	31
2	bad responder	intergenic	ENSCAFG00000040353.2(dist=25302),ENSCAFG00000034336.2(dist=190207)	ENSCAFG00000040353	-	-	chr14	15741205	15741205	G	T	0/1	16,12	0.435	28
2	bad responder	intronic	ENSCAFG00000001898.5	ENSCAFG00000001898	CDK14	CDK14	chr14	16755961	16755961	A	T	0|1	32,3	0.111	35
2	bad responder	intronic	ENSCAFG00000001898.5	ENSCAFG00000001898	CDK14	CDK14	chr14	16755969	16755969	A	G	0|1	32,3	0.111	35
2	bad responder	intronic	ENSCAFG00000044569.1	ENSCAFG00000044569	BET1	BET1	chr14	19551873	19551873	T	C	0/1	19,3	0.166	22
2	bad responder	intergenic	ENSCAFG00000002069.4(dist=5360),ENSCAFG00000002093.4(dist=52201)	ENSCAFG00000002069	-	-	chr14	19924887	19924887	T	A	0/1	18,10	0.409	28
2	bad responder	intronic	ENSCAFG00000002104.5	ENSCAFG00000002104	SGCE	SGCE	chr14	20084270	20084270	A	G	0/1	17,4	0.168	21
2	bad responder	intergenic	ENSCAFG00000032379.2(dist=17682),ENSCAFG00000027847.1(dist=6819)	ENSCAFG00000032379	-	-	chr14	20151815	20151815	A	C	0|1	19,3	0.158	22
2	bad responder	intergenic	ENSCAFG00000032379.2(dist=17685),ENSCAFG00000027847.1(dist=6816)	ENSCAFG00000032379	-	-	chr14	20151818	20151818	G	T	0|1	19,3	0.157	22
2	bad responder	intronic	ENSCAFG00000002187.4	ENSCAFG00000002187	DLX6	DLX6	chr14	22146333	22146333	C	T	0/1	19,6	0.222	25
2	bad responder	intronic	ENSCAFG00000029367.2	ENSCAFG00000029367	COL28A1	COL28A1	chr14	23055627	23055627	C	T	0|1	22,4	0.2	26
2	bad responder	intronic	ENSCAFG00000029367.2	ENSCAFG00000029367	COL28A1	COL28A1	chr14	23055632	23055632	A	G	0|1	20,4	0.222	24
2	bad responder	intronic	ENSCAFG00000002238.4,ENSCAFG00000002246.5	ENSCAFG00000002238	MIOS	MIOS	chr14	23332217	23332217	C	G	0|1	23,2	0.105	25
2	bad responder	intronic	ENSCAFG00000002238.4,ENSCAFG00000002246.5	ENSCAFG00000002238	MIOS	MIOS	chr14	23412373	23412373	A	T	0|1	10,6	0.375	16
2	bad responder	intronic	ENSCAFG00000002238.4,ENSCAFG00000002246.5	ENSCAFG00000002238	MIOS	MIOS	chr14	23412374	23412374	A	T	0|1	10,6	0.375	16
2	bad responder	intergenic	ENSCAFG00000025301.3(dist=625125),ENSCAFG00000046493.1(dist=761651)	ENSCAFG00000025301	-	-	chr14	24874347	24874347	G	A	0/1	20,10	0.333	30
2	bad responder	intergenic	ENSCAFG00000025301.3(dist=748925),ENSCAFG00000046493.1(dist=637851)	ENSCAFG00000025301	-	-	chr14	24998147	24998147	A	C	0/1	14,19	0.522	33
2	bad responder	intergenic	ENSCAFG00000025301.3(dist=1168592),ENSCAFG00000046493.1(dist=218184)	ENSCAFG00000025301	-	-	chr14	25417814	25417814	A	G	0/1	15,10	0.421	25
2	bad responder	intergenic	ENSCAFG00000002290.4(dist=224155),ENSCAFG00000002306.4(dist=128990)	ENSCAFG00000002290	-	-	chr14	27011697	27011697	A	G	0/1	22,3	0.158	25
2	bad responder	intergenic	ENSCAFG00000026916.1(dist=188253),ENSCAFG00000038510.2(dist=55441)	ENSCAFG00000026916	-	-	chr14	29786491	29786491	A	C	0/1	12,16	0.572	28
2	bad responder	intergenic	ENSCAFG00000044766.1(dist=84549),ENSCAFG00000031802.2(dist=93689)	ENSCAFG00000044766	-	-	chr14	30554439	30554439	A	C	0|1	26,3	0.136	29
2	bad responder	intergenic	ENSCAFG00000044766.1(dist=84554),ENSCAFG00000031802.2(dist=93684)	ENSCAFG00000044766	-	-	chr14	30554444	30554444	G	T	0|1	27,3	0.13	30
2	bad responder	intronic	ENSCAFG00000031802.2	ENSCAFG00000031802	CRPPA	CRPPA	chr14	30803872	30803872	T	C	0|1	20,3	0.175	23
2	bad responder	intronic	ENSCAFG00000031802.2	ENSCAFG00000031802	CRPPA	CRPPA	chr14	30803879	30803879	G	A	0|1	20,3	0.175	23
2	bad responder	intergenic	ENSCAFG00000002424.4(dist=16061),ENSCAFG00000002432.5(dist=28268)	ENSCAFG00000002424	-	-	chr14	31232972	31232972	G	A	0/1	17,3	0.175	20
2	bad responder	intronic	ENSCAFG00000002498.4	ENSCAFG00000002498	HDAC9	HDAC9	chr14	32891049	32891049	A	C	0|1	19,5	0.238	24
2	bad responder	intronic	ENSCAFG00000002498.4	ENSCAFG00000002498	HDAC9	HDAC9	chr14	32891054	32891054	G	T	0|1	20,5	0.238	25
2	bad responder	intronic	ENSCAFG00000002513.5	ENSCAFG00000002513	TMEM196	-	chr14	33902093	33902093	G	A	0/1	17,3	0.198	20
2	bad responder	intergenic	ENSCAFG00000049165.1(dist=43055),ENSCAFG00000046031.1(dist=29710)	ENSCAFG00000049165	-	-	chr14	35083995	35083995	A	C	0|1	31,2	0.115	33
2	bad responder	intergenic	ENSCAFG00000049165.1(dist=43062),ENSCAFG00000046031.1(dist=29703)	ENSCAFG00000049165	-	-	chr14	35084002	35084002	G	T	0|1	31,2	0.115	33
2	bad responder	intronic	ENSCAFG00000002731.4	ENSCAFG00000002731	RAPGEF5	RAPGEF5	chr14	36099251	36099251	A	T	0/1	17,4	0.293	21
2	bad responder	intergenic	ENSCAFG00000033183.2(dist=9198),ENSCAFG00000002742.4(dist=51301)	ENSCAFG00000033183	-	-	chr14	36568670	36568670	C	T	0/1	18,3	0.187	21
2	bad responder	intronic	ENSCAFG00000002766.4	ENSCAFG00000002766	IGF2BP3	IGF2BP3	chr14	36997487	36997487	C	A	0/1	14,10	0.388	24
2	bad responder	ncRNA_intronic	ENSCAFG00000041767.1	ENSCAFG00000041767	-	-	chr14	37919888	37919888	G	A	0|1	29,5	0.2	34
2	bad responder	ncRNA_intronic	ENSCAFG00000041767.1	ENSCAFG00000041767	-	-	chr14	37919889	37919889	T	C	0|1	29,5	0.2	34
2	bad responder	ncRNA_intronic	ENSCAFG00000041767.1	ENSCAFG00000041767	-	-	chr14	37981079	37981079	T	C	0/1	9,4	0.3	13
2	bad responder	intergenic	ENSCAFG00000002825.3(dist=15618),ENSCAFG00000002850.5(dist=9993)	ENSCAFG00000002825	-	-	chr14	38307898	38307898	A	T	0/1	18,3	0.249	21
2	bad responder	ncRNA_intronic	ENSCAFG00000038209.2	ENSCAFG00000038209	-	-	chr14	38823275	38823275	T	A	0|1	21,2	0.158	23
2	bad responder	ncRNA_intronic	ENSCAFG00000038209.2	ENSCAFG00000038209	-	-	chr14	38887378	38887378	A	C	0|1	30,2	0.091	32
2	bad responder	ncRNA_intronic	ENSCAFG00000038209.2	ENSCAFG00000038209	-	-	chr14	38887381	38887381	G	T	0|1	30,2	0.091	32
2	bad responder	ncRNA_intronic	ENSCAFG00000038209.2	ENSCAFG00000038209	-	-	chr14	38967836	38967836	G	A	0/1	24,4	0.136	28
2	bad responder	intergenic	ENSCAFG00000002897.4(dist=33876),ENSCAFG00000028917.2(dist=13786)	ENSCAFG00000002897	-	-	chr14	39553685	39553685	A	G	0|1	20,4	0.221	24
2	bad responder	intergenic	ENSCAFG00000002897.4(dist=33879),ENSCAFG00000028917.2(dist=13783)	ENSCAFG00000002897	-	-	chr14	39553688	39553688	A	T	0|1	20,4	0.221	24
2	bad responder	intergenic	ENSCAFG00000041501.1(dist=131302),ENSCAFG00000048241.1(dist=6388)	ENSCAFG00000041501	-	-	chr14	39885695	39885695	A	C	0|1	33,3	0.115	36
2	bad responder	intergenic	ENSCAFG00000041501.1(dist=131307),ENSCAFG00000048241.1(dist=6383)	ENSCAFG00000041501	-	-	chr14	39885700	39885700	G	T	0|1	32,3	0.115	35
2	bad responder	intergenic	ENSCAFG00000048649.1(dist=88721),ENSCAFG00000002977.5(dist=20081)	ENSCAFG00000048649	-	-	chr14	40652927	40652927	C	T	0/1	23,3	0.158	26
2	bad responder	upstream	ENSCAFG00000002995.5	ENSCAFG00000002995	TAX1BP1	TAX1BP1	chr14	40845168	40845168	A	C	0|1	15,3	0.231	18
2	bad responder	intronic	ENSCAFG00000003005.4	ENSCAFG00000003005	CREB5	CREB5	chr14	41615102	41615102	C	A	0|1	19,3	0.222	22
2	bad responder	intronic	ENSCAFG00000003074.3	ENSCAFG00000003074	NOD1	NOD1	chr14	43179078	43179078	A	T	0|1	19,3	0.2	22
2	bad responder	intronic	ENSCAFG00000003074.3	ENSCAFG00000003074	NOD1	NOD1	chr14	43179079	43179079	A	T	0|1	19,3	0.2	22
2	bad responder	intergenic	ENSCAFG00000003097.4(dist=33214),ENSCAFG00000003100.4(dist=21428)	ENSCAFG00000003097	-	-	chr14	43448356	43448356	A	G	0/1	39,4	0.097	43
2	bad responder	intergenic	ENSCAFG00000023315.3(dist=48942),ENSCAFG00000003111.5(dist=14050)	ENSCAFG00000023315	-	-	chr14	43687695	43687695	A	G	0|1	28,4	0.167	32
2	bad responder	intergenic	ENSCAFG00000023315.3(dist=48943),ENSCAFG00000003111.5(dist=14049)	ENSCAFG00000023315	-	-	chr14	43687696	43687696	C	T	0|1	28,4	0.167	32
2	bad responder	intergenic	ENSCAFG00000003122.4(dist=8563),ENSCAFG00000042850.1(dist=10244)	ENSCAFG00000003122	-	-	chr14	43923725	43923725	G	A	0|1	21,4	0.158	25
2	bad responder	intergenic	ENSCAFG00000048678.1(dist=9514),ENSCAFG00000003143.5(dist=11924)	ENSCAFG00000048678	-	-	chr14	44870335	44870335	A	T	0/1	13,4	0.312	17
2	bad responder	intronic	ENSCAFG00000024731.4	ENSCAFG00000024731	RP9	RP9	chr14	45173819	45173819	C	G	0/1	17,9	0.368	26
2	bad responder	intergenic	ENSCAFG00000047841.1(dist=152004),ENSCAFG00000003294.4(dist=589217)	ENSCAFG00000047841	-	-	chr14	49894694	49894694	A	G	0/1	26,6	0.225	32
2	bad responder	intronic	ENSCAFG00000003299.4	ENSCAFG00000003299	-	-	chr14	50886596	50886596	A	G	0/1	16,20	0.5	36
2	bad responder	intronic	ENSCAFG00000003299.4	ENSCAFG00000003299	-	-	chr14	51177266	51177266	T	A	0|1	30,5	0.185	35
2	bad responder	intronic	ENSCAFG00000003299.4	ENSCAFG00000003299	-	-	chr14	51202814	51202814	T	G	0|1	21,7	0.24	28
2	bad responder	intronic	ENSCAFG00000003299.4	ENSCAFG00000003299	-	-	chr14	51202817	51202817	C	A	0|1	22,7	0.231	29
2	bad responder	intronic	ENSCAFG00000003307.4	ENSCAFG00000003307	DOCK4	DOCK4	chr14	51586836	51586836	T	A	0/1	22,3	0.15	25
2	bad responder	intergenic	ENSCAFG00000003330.5(dist=22193),ENSCAFG00000030885.2(dist=5812)	ENSCAFG00000003330	-	-	chr14	52360407	52360407	A	G	0/1	23,3	0.149	26
2	bad responder	intronic	ENSCAFG00000003387.6	ENSCAFG00000003387	FOXP2	FOXP2	chr14	53851138	53851138	G	T	0/1	17,10	0.381	27
2	bad responder	intergenic	ENSCAFG00000003393.4(dist=155460),ENSCAFG00000041437.1(dist=73575)	ENSCAFG00000003393	-	-	chr14	54321657	54321657	G	T	0/1	23,14	0.37	37
2	bad responder	intronic	ENSCAFG00000003399.5	ENSCAFG00000003399	TES	TES	chr14	55216551	55216551	T	G	0/1	16,11	0.474	27
2	bad responder	intronic	ENSCAFG00000003429.4	ENSCAFG00000003429	CFTR	CFTR	chr14	56379694	56379694	T	G	0|1	29,3	0.116	32
2	bad responder	intronic	ENSCAFG00000003429.4	ENSCAFG00000003429	CFTR	CFTR	chr14	56379697	56379697	C	A	0|1	29,3	0.116	32
2	bad responder	intronic	ENSCAFG00000003432.5	ENSCAFG00000003432	CTTNBP2	CTTNBP2	chr14	56515627	56515627	C	T	0/1	14,13	0.524	27
2	bad responder	intronic	ENSCAFG00000024216.3	ENSCAFG00000024216	-	KCND2	chr14	58561735	58561735	C	T	0/1	20,3	0.157	23
2	bad responder	intergenic	ENSCAFG00000044746.1(dist=11321),ENSCAFG00000049313.1(dist=10632)	ENSCAFG00000044746	-	-	chr14	59463241	59463241	T	G	0|1	18,3	0.176	21
2	bad responder	intronic	ENSCAFG00000003553.4	ENSCAFG00000003553	CADPS2	CADPS2	chr14	60217572	60217572	G	A	0/1	11,13	0.6	24
2	bad responder	intronic	ENSCAFG00000003553.4	ENSCAFG00000003553	CADPS2	CADPS2	chr14	60336099	60336099	T	C	0/1	25,4	0.167	29
2	bad responder	intronic	ENSCAFG00000003553.4	ENSCAFG00000003553	CADPS2	CADPS2	chr14	60448503	60448503	T	A	0/1	24,6	0.229	30
2	bad responder	intergenic	ENSCAFG00000047032.1(dist=11296),ENSCAFG00000003576.4(dist=90086)	ENSCAFG00000047032	-	-	chr14	60576391	60576391	G	C	0/1	31,4	0.174	35
2	bad responder	intergenic	ENSCAFG00000047032.1(dist=29465),ENSCAFG00000003576.4(dist=71917)	ENSCAFG00000047032	-	-	chr14	60594560	60594560	C	T	0/1	17,4	0.213	21
2	bad responder	intronic	ENSCAFG00000003576.4	ENSCAFG00000003576	SLC13A1	SLC13A1	chr14	60717630	60717630	C	T	0/1	13,2	0.231	15
2	bad responder	intronic	ENSCAFG00000002514.4	ENSCAFG00000002514	TMEM269	TMEM269	chr15	580637	580637	A	C	0|1	22,3	0.211	25
2	bad responder	intronic	ENSCAFG00000002514.4	ENSCAFG00000002514	TMEM269	TMEM269	chr15	580640	580640	G	T	0|1	22,3	0.211	25
2	bad responder	intronic	ENSCAFG00000002563.4	ENSCAFG00000002563	FOXJ3	FOXJ3	chr15	1058468	1058468	A	T	0|1	17,3	0.25	20
2	bad responder	intergenic	ENSCAFG00000047586.1(dist=50635),ENSCAFG00000042192.1(dist=113957)	ENSCAFG00000047586	-	-	chr15	1336076	1336076	A	T	0/1	22,16	0.461	38
2	bad responder	ncRNA_intronic	ENSCAFG00000038329.2	ENSCAFG00000038329	-	-	chr15	1876064	1876064	A	G	0|1	16,3	0.199	19
2	bad responder	ncRNA_intronic	ENSCAFG00000038329.2	ENSCAFG00000038329	-	-	chr15	1876065	1876065	C	T	0|1	16,3	0.198	19
2	bad responder	intronic	ENSCAFG00000002827.4	ENSCAFG00000002827	NFYC	NFYC	chr15	2305792	2305792	T	A	0/1	22,4	0.237	26
2	bad responder	intergenic	ENSCAFG00000003196.5(dist=144427),ENSCAFG00000049742.1(dist=86384)	ENSCAFG00000003196	-	-	chr15	4036931	4036931	T	C	0/1	13,4	0.229	17
2	bad responder	ncRNA_exonic	ENSCAFG00000045501.1	ENSCAFG00000045501	-	-	chr15	5176892	5176892	-	G	0/1	11,10	0.501	21
2	bad responder	intronic	ENSCAFG00000003333.5	ENSCAFG00000003333	GRIK3	GRIK3	chr15	5377051	5377051	A	C	0|1	17,2	0.167	19
2	bad responder	intronic	ENSCAFG00000003333.5	ENSCAFG00000003333	GRIK3	GRIK3	chr15	5377056	5377056	G	T	0|1	19,2	0.158	21
2	bad responder	intergenic	ENSCAFG00000003389.4(dist=8691),ENSCAFG00000023898.5(dist=15703)	ENSCAFG00000003389	-	-	chr15	6030566	6030566	C	A	0|1	17,3	0.158	20
2	bad responder	intergenic	ENSCAFG00000003389.4(dist=8696),ENSCAFG00000023898.5(dist=15698)	ENSCAFG00000003389	-	-	chr15	6030571	6030571	T	G	0|1	18,3	0.157	21
2	bad responder	intergenic	ENSCAFG00000003443.4(dist=32494),ENSCAFG00000024306.4(dist=1581)	ENSCAFG00000003443	-	-	chr15	6327832	6327832	C	T	0/1	12,10	0.412	22
2	bad responder	intronic	ENSCAFG00000003583.6	ENSCAFG00000003583	ZMYM4	ZMYM4	chr15	6770075	6770075	C	A	0|1	13,2	0.198	15
2	bad responder	intronic	ENSCAFG00000003602.5	ENSCAFG00000003602	DLGAP3	DLGAP3	chr15	7060531	7060531	C	T	0/1	26,3	0.125	29
2	bad responder	intergenic	ENSCAFG00000047719.1(dist=20874),ENSCAFG00000041371.1(dist=22288)	ENSCAFG00000047719	-	-	chr15	7278669	7278669	G	A	0/1	27,3	0.125	30
2	bad responder	intergenic	ENSCAFG00000041371.1(dist=203281),ENSCAFG00000003671.4(dist=354396)	ENSCAFG00000041371	-	-	chr15	7560700	7560700	C	T	0/1	18,7	0.348	25
2	bad responder	intergenic	ENSCAFG00000041371.1(dist=248702),ENSCAFG00000003671.4(dist=308975)	ENSCAFG00000041371	-	-	chr15	7606121	7606121	T	A	0|1	17,2	0.187	19
2	bad responder	intergenic	ENSCAFG00000041371.1(dist=248703),ENSCAFG00000003671.4(dist=308974)	ENSCAFG00000041371	-	-	chr15	7606122	7606122	T	A	0|1	17,2	0.187	19
2	bad responder	intergenic	ENSCAFG00000041371.1(dist=468451),ENSCAFG00000003671.4(dist=89226)	ENSCAFG00000041371	-	-	chr15	7825870	7825870	T	A	0/1	12,4	0.273	16
2	bad responder	intronic	ENSCAFG00000003704.3	ENSCAFG00000003704	SHCBP1	SHCBP1	chr15	8485201	8485201	A	C	0/1	12,2	0.231	14
2	bad responder	intronic	ENSCAFG00000003713.4	ENSCAFG00000003713	ZYG11B	ZYG11B	chr15	8647486	8647486	C	T	0/1	18,4	0.186	22
2	bad responder	intergenic	ENSCAFG00000030004.2(dist=17777),ENSCAFG00000003728.4(dist=8534)	ENSCAFG00000030004	-	-	chr15	8735202	8735202	C	G	0/1	18,3	0.167	21
2	bad responder	intronic	ENSCAFG00000003734.6	ENSCAFG00000003734	TUT4	TUT4	chr15	8929937	8929937	A	T	0/1	24,4	0.182	28
2	bad responder	exonic	ENSCAFG00000003751.4	ENSCAFG00000003751	CC2D1B	CC2D1B	chr15	9006970	9006970	C	T	0/1	23,3	0.166	26
2	bad responder	intronic	ENSCAFG00000003759.5,ENSCAFG00000029215.2	ENSCAFG00000003759	ZFYVE9	ZFYVE9	chr15	9268313	9268313	T	C	0/1	22,4	0.15	26
2	bad responder	intronic	ENSCAFG00000003803.5	ENSCAFG00000003803	NRDC	NRDC	chr15	9419170	9419170	A	G	0|1	13,2	0.231	15
2	bad responder	intronic	ENSCAFG00000003803.5	ENSCAFG00000003803	NRDC	NRDC	chr15	9419171	9419171	C	T	0|1	13,2	0.231	15
2	bad responder	ncRNA_intronic	ENSCAFG00000041341.1	ENSCAFG00000041341	-	-	chr15	10723976	10723976	G	A	0|1	38,4	0.096	42
2	bad responder	ncRNA_intronic	ENSCAFG00000041341.1	ENSCAFG00000041341	-	-	chr15	10723979	10723979	T	C	0|1	38,4	0.097	42
2	bad responder	ncRNA_intronic	ENSCAFG00000041346.1	ENSCAFG00000041346	-	-	chr15	10846552	10846552	A	C	0|1	17,2	0.176	19
2	bad responder	ncRNA_intronic	ENSCAFG00000041346.1	ENSCAFG00000041346	-	-	chr15	10846553	10846553	G	T	0|1	17,2	0.176	19
2	bad responder	ncRNA_intronic	ENSCAFG00000041346.1	ENSCAFG00000041346	-	-	chr15	10872082	10872082	T	A	0|1	23,4	0.158	27
2	bad responder	intronic	ENSCAFG00000003935.5	ENSCAFG00000003935	AGBL4	AGBL4	chr15	12113574	12113574	C	G	0/1	28,3	0.153	31
2	bad responder	intronic	ENSCAFG00000004231.5	ENSCAFG00000004231	DMBX1	DMBX1	chr15	13940559	13940559	G	C	0|1	25,3	0.158	28
2	bad responder	intronic	ENSCAFG00000004259.5	ENSCAFG00000004259	NSUN4	NSUN4	chr15	14060052	14060052	A	T	0/1	20,3	0.169	23
2	bad responder	intronic	ENSCAFG00000004390.5	ENSCAFG00000004390	MAST2	MAST2	chr15	14382133	14382133	A	T	0|1	17,3	0.166	20
2	bad responder	intronic	ENSCAFG00000004466.4	ENSCAFG00000004466	GPBP1L1	GPBP1L1	chr15	14729895	14729895	A	C	0|1	36,2	0.103	38
2	bad responder	intronic	ENSCAFG00000004466.4	ENSCAFG00000004466	GPBP1L1	GPBP1L1	chr15	14729900	14729900	G	T	0|1	36,2	0.103	38
2	bad responder	intronic	ENSCAFG00000004466.4	ENSCAFG00000004466	GPBP1L1	GPBP1L1	chr15	14730570	14730570	A	-	0|1	35,4	0.148	39
2	bad responder	intronic	ENSCAFG00000004466.4	ENSCAFG00000004466	GPBP1L1	GPBP1L1	chr15	14730576	14730576	-	T	0|1	36,4	0.142	40
2	bad responder	intronic	ENSCAFG00000004517.5	ENSCAFG00000004517	NASP	NASP	chr15	14746965	14746965	T	C	0/1	22,3	0.15	25
2	bad responder	intronic	ENSCAFG00000004681.4	ENSCAFG00000004681	EIF2B3	EIF2B3	chr15	15478807	15478807	G	A	0|1	31,3	0.159	34
2	bad responder	intronic	ENSCAFG00000004681.4	ENSCAFG00000004681	EIF2B3	EIF2B3	chr15	15478808	15478808	T	C	0|1	31,3	0.16	34
2	bad responder	intronic	ENSCAFG00000004790.4	ENSCAFG00000004790	ARMH1	ARMH1	chr15	15638432	15638432	G	C	0|1	42,4	0.108	46
2	bad responder	intronic	ENSCAFG00000004792.5	ENSCAFG00000004792	RNF220	RNF220	chr15	15720460	15720460	A	T	0/1	37,4	0.137	41
2	bad responder	downstream	ENSCAFG00000004887.4	ENSCAFG00000004887	ST3GAL3	ST3GAL3	chr15	16323930	16323930	G	A	0/1	27,3	0.13	30
2	bad responder	intergenic	ENSCAFG00000004887.4(dist=72498),ENSCAFG00000004903.5(dist=47586)	ENSCAFG00000004887	-	-	chr15	16474114	16474114	G	C	0/1	30,3	0.173	33
2	bad responder	intergenic	ENSCAFG00000005339.4(dist=29767),ENSCAFG00000036371.2(dist=112842)	ENSCAFG00000005339	-	-	chr15	17028754	17028754	G	A	0/1	24,12	0.333	36
2	bad responder	intergenic	ENSCAFG00000042813.1(dist=17503),ENSCAFG00000041683.1(dist=1928)	ENSCAFG00000042813	-	-	chr15	17493993	17493993	C	T	0/1	17,9	0.381	26
2	bad responder	intergenic	ENSCAFG00000024274.3(dist=6772),ENSCAFG00000005424.3(dist=21208)	ENSCAFG00000024274	-	-	chr15	17912973	17912973	G	A	0|1	23,2	0.13	25
2	bad responder	intergenic	ENSCAFG00000047633.1(dist=4038),ENSCAFG00000005688.5(dist=153241)	ENSCAFG00000047633	-	-	chr15	18974794	18974794	T	C	0/1	23,4	0.136	27
2	bad responder	intronic	ENSCAFG00000005707.6	ENSCAFG00000005707	OSBPL8	OSBPL8	chr15	19231560	19231560	T	A	0/1	39,4	0.166	43
2	bad responder	ncRNA_intronic	ENSCAFG00000048007.1	ENSCAFG00000048007	-	-	chr15	20027791	20027791	T	A	0/1	19,3	0.187	22
2	bad responder	intergenic	ENSCAFG00000046662.1(dist=152954),ENSCAFG00000005722.2(dist=132348)	ENSCAFG00000046662	-	-	chr15	20274130	20274130	G	T	0/1	22,9	0.32	31
2	bad responder	intergenic	ENSCAFG00000041040.1(dist=175269),ENSCAFG00000005766.4(dist=536775)	ENSCAFG00000041040	-	-	chr15	21297988	21297988	T	C	0/1	22,16	0.423	38
2	bad responder	intergenic	ENSCAFG00000041040.1(dist=544691),ENSCAFG00000005766.4(dist=167353)	ENSCAFG00000041040	-	-	chr15	21667410	21667410	C	T	0/1	11,8	0.429	19
2	bad responder	intronic	ENSCAFG00000005766.4	ENSCAFG00000005766	SYT1	SYT1	chr15	22037571	22037571	A	G	0/1	20,3	0.158	23
2	bad responder	intergenic	ENSCAFG00000005766.4(dist=86557),ENSCAFG00000005779.6(dist=144970)	ENSCAFG00000005766	-	-	chr15	22129289	22129289	A	T	0/1	9,3	0.364	12
2	bad responder	intronic	ENSCAFG00000005801.5	ENSCAFG00000005801	PTPRQ	PTPRQ	chr15	23010118	23010118	G	A	0/1	16,3	0.188	19
2	bad responder	downstream	ENSCAFG00000005808.4	ENSCAFG00000005808	MYF5	MYF5	chr15	23052885	23052885	C	T	0/1	6,14	0.667	20
2	bad responder	intronic	ENSCAFG00000005910.4	ENSCAFG00000005910	METTL25	METTL25	chr15	24392060	24392060	T	C	0/1	17,4	0.168	21
2	bad responder	intergenic	ENSCAFG00000005910.4(dist=66179),ENSCAFG00000005914.4(dist=81395)	ENSCAFG00000005910	-	-	chr15	24547762	24547762	T	G	0|1	31,6	0.207	37
2	bad responder	intergenic	ENSCAFG00000005910.4(dist=66182),ENSCAFG00000005914.4(dist=81392)	ENSCAFG00000005910	-	-	chr15	24547765	24547765	C	A	0|1	31,6	0.207	37
2	bad responder	intergenic	ENSCAFG00000044989.1(dist=106929),ENSCAFG00000043948.1(dist=47644)	ENSCAFG00000044989	-	-	chr15	26306865	26306865	G	A	0/1	18,4	0.222	22
2	bad responder	intergenic	ENSCAFG00000043948.1(dist=47350),ENSCAFG00000005946.5(dist=83115)	ENSCAFG00000043948	-	-	chr15	26403700	26403700	G	T	0|1	22,3	0.15	25
2	bad responder	intergenic	ENSCAFG00000043948.1(dist=47351),ENSCAFG00000005946.5(dist=83114)	ENSCAFG00000043948	-	-	chr15	26403701	26403701	A	C	0|1	22,3	0.15	25
2	bad responder	intronic	ENSCAFG00000005976.4	ENSCAFG00000005976	NTS	NTS	chr15	27371643	27371643	G	T	0|1	17,3	0.266	20
2	bad responder	intergenic	ENSCAFG00000043814.1(dist=238424),ENSCAFG00000005990.4(dist=87361)	ENSCAFG00000043814	-	-	chr15	29053566	29053566	A	G	0/1	29,8	0.208	37
2	bad responder	intergenic	ENSCAFG00000037353.2(dist=119946),ENSCAFG00000006091.4(dist=64179)	ENSCAFG00000037353	-	-	chr15	29526991	29526991	G	C	0/1	17,4	0.177	21
2	bad responder	intronic	ENSCAFG00000006091.4	ENSCAFG00000006091	KITLG	KITLG	chr15	29641585	29641585	T	A	0/1	40,4	0.147	44
2	bad responder	intergenic	ENSCAFG00000044528.1(dist=15355),ENSCAFG00000040021.2(dist=183341)	ENSCAFG00000044528	-	-	chr15	29769452	29769452	G	A	0/1	32,12	0.267	44
2	bad responder	intergenic	ENSCAFG00000006100.4(dist=17140),ENSCAFG00000006105.5(dist=38385)	ENSCAFG00000006100	-	-	chr15	30343648	30343648	T	C	0|1	20,4	0.211	24
2	bad responder	intergenic	ENSCAFG00000006100.4(dist=17143),ENSCAFG00000006105.5(dist=38382)	ENSCAFG00000006100	-	-	chr15	30343651	30343651	G	A	0|1	20,4	0.211	24
2	bad responder	ncRNA_intronic	ENSCAFG00000034844.2	ENSCAFG00000034844	-	-	chr15	30760003	30760003	C	G	0/1	18,2	0.133	20
2	bad responder	intergenic	ENSCAFG00000034844.2(dist=22389),ENSCAFG00000047668.1(dist=47477)	ENSCAFG00000034844	-	-	chr15	30885676	30885676	T	A	0|1	16,2	0.176	18
2	bad responder	intergenic	ENSCAFG00000034844.2(dist=22390),ENSCAFG00000047668.1(dist=47476)	ENSCAFG00000034844	-	-	chr15	30885677	30885677	T	A	0|1	16,2	0.176	18
2	bad responder	intergenic	ENSCAFG00000006147.2(dist=63747),ENSCAFG00000043460.1(dist=28358)	ENSCAFG00000006147	-	-	chr15	32059022	32059022	G	A	0|1	41,4	0.121	45
2	bad responder	intergenic	ENSCAFG00000043460.1(dist=161717),ENSCAFG00000046695.1(dist=169822)	ENSCAFG00000043460	-	-	chr15	32255474	32255474	A	C	0|1	25,6	0.19	31
2	bad responder	intergenic	ENSCAFG00000043460.1(dist=161722),ENSCAFG00000046695.1(dist=169817)	ENSCAFG00000043460	-	-	chr15	32255479	32255479	G	T	0|1	23,5	0.19	28
2	bad responder	intronic	ENSCAFG00000006222.4	ENSCAFG00000006222	CEP83	CEP83	chr15	34477614	34477614	A	T	0|1	19,2	0.176	21
2	bad responder	intergenic	ENSCAFG00000006375.5(dist=60366),ENSCAFG00000006388.4(dist=53506)	ENSCAFG00000006375	-	-	chr15	35474627	35474627	G	C	0/1	22,2	0.11	24
2	bad responder	intronic	ENSCAFG00000006596.4	ENSCAFG00000006596	ANKS1B	ANKS1B	chr15	38710832	38710832	T	C	0/1	14,6	0.294	20
2	bad responder	intronic	ENSCAFG00000007248.5	ENSCAFG00000007248	GNPTAB	GNPTAB	chr15	40655264	40655264	A	T	0/1	27,3	0.174	30
2	bad responder	intronic	ENSCAFG00000007270.4	ENSCAFG00000007270	-	WASHC3	chr15	40896971	40896971	T	C	0/1	17,3	0.214	20
2	bad responder	intergenic	ENSCAFG00000007324.5(dist=13558),ENSCAFG00000048900.1(dist=80883)	ENSCAFG00000007324	-	-	chr15	41708949	41708949	G	C	0/1	12,7	0.385	19
2	bad responder	intergenic	ENSCAFG00000026891.2(dist=5830),ENSCAFG00000007334.5(dist=129201)	ENSCAFG00000026891	-	-	chr15	42058589	42058589	A	T	0|1	28,4	0.16	32
2	bad responder	intergenic	ENSCAFG00000026891.2(dist=5833),ENSCAFG00000007334.5(dist=129198)	ENSCAFG00000026891	-	-	chr15	42058592	42058592	A	T	0|1	28,3	0.124	31
2	bad responder	intergenic	ENSCAFG00000007372.5(dist=31004),ENSCAFG00000007427.3(dist=11134)	ENSCAFG00000007372	-	-	chr15	42445630	42445630	G	A	0/1	17,6	0.234	23
2	bad responder	intergenic	ENSCAFG00000042985.1(dist=44588),ENSCAFG00000042612.1(dist=1717)	ENSCAFG00000042985	-	-	chr15	42716203	42716205	CCT	-	0/1	26,4	0.12	30
2	bad responder	intergenic	ENSCAFG00000049788.1(dist=35236),ENSCAFG00000031944.2(dist=93038)	ENSCAFG00000049788	-	-	chr15	42925670	42925670	G	A	0/1	19,4	0.176	23
2	bad responder	intergenic	ENSCAFG00000049788.1(dist=71378),ENSCAFG00000031944.2(dist=56896)	ENSCAFG00000049788	-	-	chr15	42961812	42961812	C	G	0|1	22,3	0.156	25
2	bad responder	intronic	ENSCAFG00000007747.4	ENSCAFG00000007747	SLC10A7	SLC10A7	chr15	44768939	44768939	A	C	0|1	23,4	0.2	27
2	bad responder	intronic	ENSCAFG00000007813.4	ENSCAFG00000007813	NR3C2	NR3C2	chr15	46565238	46565238	-	CCAGAGG	0/1	25,4	0.172	29
2	bad responder	ncRNA_intronic	ENSCAFG00000034119.2	ENSCAFG00000034119	-	-	chr15	46967621	46967621	T	A	0/1	16,3	0.176	19
2	bad responder	intergenic	ENSCAFG00000021306.1(dist=50372),ENSCAFG00000007842.4(dist=109439)	ENSCAFG00000021306	-	-	chr15	47376352	47376352	-	T	0/1	8,17	0.666	25
2	bad responder	intergenic	ENSCAFG00000021306.1(dist=141836),ENSCAFG00000007842.4(dist=17975)	ENSCAFG00000021306	-	-	chr15	47467816	47467816	C	A	0|1	16,2	0.213	18
2	bad responder	intergenic	ENSCAFG00000021306.1(dist=141837),ENSCAFG00000007842.4(dist=17974)	ENSCAFG00000021306	-	-	chr15	47467817	47467817	T	G	0|1	16,2	0.214	18
2	bad responder	intronic	ENSCAFG00000007870.4	ENSCAFG00000007870	DCLK2	DCLK2	chr15	48166981	48166981	C	T	0|1	18,3	0.187	21
2	bad responder	intronic	ENSCAFG00000008071.5	ENSCAFG00000008071	FAM160A1	FAM160A1	chr15	49397095	49397095	T	G	0|1	17,2	0.176	19
2	bad responder	ncRNA_intronic	ENSCAFG00000044128.1	ENSCAFG00000044128	-	-	chr15	50111135	50111135	A	C	0|1	39,5	0.129	44
2	bad responder	ncRNA_intronic	ENSCAFG00000044128.1	ENSCAFG00000044128	-	-	chr15	50111136	50111136	G	T	0|1	39,5	0.129	44
2	bad responder	intergenic	ENSCAFG00000008164.4(dist=6897),ENSCAFG00000008168.4(dist=67274)	ENSCAFG00000008164	-	-	chr15	50541867	50541867	T	G	0|1	17,4	0.15	21
2	bad responder	intronic	ENSCAFG00000008602.4	ENSCAFG00000008602	CTSO	CTSO	chr15	53435225	53435225	A	G	0|1	28,2	0.115	30
2	bad responder	intronic	ENSCAFG00000008602.4	ENSCAFG00000008602	CTSO	CTSO	chr15	53435228	53435228	C	T	0|1	28,2	0.115	30
2	bad responder	intergenic	ENSCAFG00000008602.4(dist=45696),ENSCAFG00000042162.1(dist=4694)	ENSCAFG00000008602	-	-	chr15	53496307	53496307	G	A	0/1	15,8	0.368	23
2	bad responder	intergenic	ENSCAFG00000042162.1(dist=315034),ENSCAFG00000027778.1(dist=21106)	ENSCAFG00000042162	-	-	chr15	53832460	53832460	G	A	0|1	18,4	0.249	22
2	bad responder	intergenic	ENSCAFG00000042162.1(dist=315035),ENSCAFG00000027778.1(dist=21105)	ENSCAFG00000042162	-	-	chr15	53832461	53832461	T	C	0|1	18,4	0.25	22
2	bad responder	intronic	ENSCAFG00000008617.4	ENSCAFG00000008617	GLRB	GLRB	chr15	54490142	54490142	C	A	0|1	17,3	0.187	20
2	bad responder	intronic	ENSCAFG00000008653.4	ENSCAFG00000008653	GRIA2	GRIA2	chr15	54680777	54680777	T	A	0|1	18,2	0.118	20
2	bad responder	intronic	ENSCAFG00000008653.4	ENSCAFG00000008653	GRIA2	GRIA2	chr15	54680780	54680780	T	A	0|1	18,2	0.118	20
2	bad responder	intronic	ENSCAFG00000008672.5	ENSCAFG00000008672	RXFP1	RXFP1	chr15	55687994	55687994	G	T	0|1	26,3	0.15	29
2	bad responder	intergenic	ENSCAFG00000021743.1(dist=672279),ENSCAFG00000042429.1(dist=13818)	ENSCAFG00000021743	-	-	chr15	57932270	57932270	C	G	0/1	35,3	0.138	38
2	bad responder	intronic	ENSCAFG00000008759.4	ENSCAFG00000008759	FSTL5	FSTL5	chr15	58001965	58001965	-	G	0/1	16,10	0.382	26
2	bad responder	intronic	ENSCAFG00000008759.4	ENSCAFG00000008759	FSTL5	FSTL5	chr15	58258221	58258221	T	A	0/1	14,9	0.45	23
2	bad responder	intergenic	ENSCAFG00000021615.1(dist=36465),ENSCAFG00000037727.2(dist=57452)	ENSCAFG00000021615	-	-	chr15	59298578	59298578	-	C	0/1	22,10	0.316	32
2	bad responder	intergenic	ENSCAFG00000008804.4(dist=41250),ENSCAFG00000034831.2(dist=563536)	ENSCAFG00000008804	-	-	chr15	60077310	60077310	G	T	0|1	34,4	0.156	38
2	bad responder	intergenic	ENSCAFG00000008804.4(dist=41251),ENSCAFG00000034831.2(dist=563535)	ENSCAFG00000008804	-	-	chr15	60077311	60077311	A	C	0|1	34,4	0.156	38
2	bad responder	ncRNA_intronic	ENSCAFG00000045789.1	ENSCAFG00000045789	-	-	chr15	60772293	60772293	A	T	0|1	23,3	0.158	26
2	bad responder	intergenic	ENSCAFG00000043145.1(dist=142423),ENSCAFG00000045332.1(dist=34386)	ENSCAFG00000043145	-	-	chr15	61566761	61566761	G	A	0/1	27,3	0.125	30
2	bad responder	intronic	ENSCAFG00000008883.4	ENSCAFG00000008883	TLL1	TLL1	chr15	61768580	61768580	T	C	0/1	13,6	0.312	19
2	bad responder	intergenic	ENSCAFG00000046091.1(dist=36851),ENSCAFG00000008936.5(dist=93661)	ENSCAFG00000046091	-	-	chr15	62302046	62302046	A	C	0/1	14,4	0.231	18
2	bad responder	intronic	ENSCAFG00000008936.5	ENSCAFG00000008936	SPOCK3	SPOCK3	chr15	62419621	62419621	G	A	0/1	9,15	0.556	24
2	bad responder	intergenic	ENSCAFG00000008936.5(dist=314496),ENSCAFG00000008973.4(dist=564246)	ENSCAFG00000008936	-	-	chr15	62975808	62975808	A	G	0/1	15,12	0.445	27
2	bad responder	intergenic	ENSCAFG00000037642.2(dist=14709),ENSCAFG00000034663.2(dist=176142)	ENSCAFG00000037642	-	-	chr16	542799	542799	T	C	0/1	24,4	0.149	28
2	bad responder	intergenic	ENSCAFG00000042117.1(dist=57544),ENSCAFG00000049047.1(dist=22793)	ENSCAFG00000042117	-	-	chr16	845603	845603	G	A	0/1	14,15	0.522	29
2	bad responder	intergenic	ENSCAFG00000046152.1(dist=13909),ENSCAFG00000012294.4(dist=3134)	ENSCAFG00000046152	-	-	chr16	1018838	1018838	A	G	0/1	19,4	0.167	23
2	bad responder	intronic	ENSCAFG00000012249.5	ENSCAFG00000012249	ADCY1	ADCY1	chr16	1142989	1142989	-	A	0/1	50,14	0.19	64
2	bad responder	intronic	ENSCAFG00000003479.4	ENSCAFG00000003479	CNTNAP2	CNTNAP2	chr16	2412086	2412086	A	T	0/1	25,4	0.15	29
2	bad responder	intronic	ENSCAFG00000003479.4	ENSCAFG00000003479	CNTNAP2	CNTNAP2	chr16	2899555	2899555	T	C	0|1	17,3	0.166	20
2	bad responder	intronic	ENSCAFG00000003479.4	ENSCAFG00000003479	CNTNAP2	CNTNAP2	chr16	3230255	3230255	T	G	0/1	15,10	0.428	25
2	bad responder	intronic	ENSCAFG00000003479.4	ENSCAFG00000003479	CNTNAP2	CNTNAP2	chr16	4032309	4032309	G	C	0|1	37,3	0.107	40
2	bad responder	intergenic	ENSCAFG00000003479.4(dist=16807),ENSCAFG00000038018.2(dist=66851)	ENSCAFG00000003479	-	-	chr16	4225223	4225223	G	A	0/1	16,4	0.176	20
2	bad responder	intergenic	ENSCAFG00000041101.1(dist=278293),ENSCAFG00000048098.1(dist=2962)	ENSCAFG00000041101	-	-	chr16	4659537	4659537	G	T	0/1	21,2	0.148	23
2	bad responder	intronic	ENSCAFG00000025529.3	ENSCAFG00000025529	TPK1	TPK1	chr16	5351548	5351548	T	C	0|1	33,2	0.115	35
2	bad responder	intronic	ENSCAFG00000025529.3	ENSCAFG00000025529	TPK1	TPK1	chr16	5351549	5351549	G	A	0|1	33,2	0.115	35
2	bad responder	intergenic	ENSCAFG00000041649.1(dist=1817),ENSCAFG00000029411.1(dist=21209)	ENSCAFG00000041649	-	-	chr16	5921670	5921670	G	A	0/1	22,3	0.15	25
2	bad responder	intergenic	ENSCAFG00000028175.2(dist=15164),ENSCAFG00000003907.5(dist=34922)	ENSCAFG00000028175	-	-	chr16	8187985	8187985	A	G	0/1	13,4	0.228	17
2	bad responder	ncRNA_intronic	ENSCAFG00000041623.1	ENSCAFG00000041623	-	-	chr16	8673989	8673989	-	CA	0|1	43,5	0.114	48
2	bad responder	ncRNA_intronic	ENSCAFG00000041623.1	ENSCAFG00000041623	-	-	chr16	8673996	8673997	TG	-	0|1	44,5	0.114	49
2	bad responder	intronic	ENSCAFG00000004115.4	ENSCAFG00000004115	KIAA1549	KIAA1549	chr16	9764138	9764138	G	A	0/1	21,3	0.2	24
2	bad responder	intronic	ENSCAFG00000004115.4	ENSCAFG00000004115	KIAA1549	KIAA1549	chr16	9801374	9801374	T	C	0|1	26,4	0.136	30
2	bad responder	intronic	ENSCAFG00000004115.4	ENSCAFG00000004115	KIAA1549	KIAA1549	chr16	9801381	9801381	G	A	0|1	27,3	0.13	30
2	bad responder	intronic	ENSCAFG00000003136.5	ENSCAFG00000003136	CCM2	CCM2	chr16	10376965	10376965	G	C	0|1	18,2	0.105	20
2	bad responder	intergenic	ENSCAFG00000003363.4(dist=242266),ENSCAFG00000039363.2(dist=10714)	ENSCAFG00000003363	-	-	chr16	11907243	11907243	A	G	0/1	33,2	0.111	35
2	bad responder	intergenic	ENSCAFG00000028206.1(dist=17928),ENSCAFG00000037709.2(dist=23219)	ENSCAFG00000028206	-	-	chr16	12164224	12164224	T	A	0|1	20,2	0.167	22
2	bad responder	intergenic	ENSCAFG00000048645.1(dist=5560),ENSCAFG00000028561.2(dist=1958)	ENSCAFG00000048645	-	-	chr16	13906910	13906910	T	G	0/1	31,10	0.267	41
2	bad responder	intergenic	ENSCAFG00000025209.3(dist=49024),ENSCAFG00000025145.3(dist=2944)	ENSCAFG00000025209	-	-	chr16	14363118	14363118	T	A	0/1	18,4	0.188	22
2	bad responder	intronic	ENSCAFG00000004912.4	ENSCAFG00000004912	PRKAG2	PRKAG2	chr16	15720403	15720403	C	A	0|1	34,3	0.124	37
2	bad responder	intronic	ENSCAFG00000004912.4	ENSCAFG00000004912	PRKAG2	PRKAG2	chr16	15720404	15720404	T	G	0|1	34,3	0.125	37
2	bad responder	downstream	ENSCAFG00000004955.6	ENSCAFG00000004955	KMT2C	KMT2C	chr16	15963749	15963749	G	T	0/1	20,11	0.435	31
2	bad responder	intergenic	ENSCAFG00000035230.2(dist=40377),ENSCAFG00000042881.1(dist=8173)	ENSCAFG00000035230	-	-	chr16	16302693	16302693	G	C	0|1	18,3	0.222	21
2	bad responder	intergenic	ENSCAFG00000004964.4(dist=28285),ENSCAFG00000004971.5(dist=13531)	ENSCAFG00000004964	-	-	chr16	16457322	16457322	C	G	0|1	23,4	0.19	27
2	bad responder	intergenic	ENSCAFG00000045441.1(dist=138872),ENSCAFG00000043914.1(dist=84689)	ENSCAFG00000045441	-	-	chr16	16747336	16747336	A	T	0|1	19,3	0.166	22
2	bad responder	intergenic	ENSCAFG00000049508.1(dist=4541),ENSCAFG00000047874.1(dist=368016)	ENSCAFG00000049508	-	-	chr16	16945525	16945525	C	T	0/1	21,3	0.167	24
2	bad responder	intergenic	ENSCAFG00000049508.1(dist=282396),ENSCAFG00000047874.1(dist=90161)	ENSCAFG00000049508	-	-	chr16	17223380	17223380	T	A	0/1	18,3	0.149	21
2	bad responder	intergenic	ENSCAFG00000042937.1(dist=27216),ENSCAFG00000005036.4(dist=5552)	ENSCAFG00000042937	-	-	chr16	17351970	17351970	T	C	0/1	20,4	0.167	24
2	bad responder	intronic	ENSCAFG00000005036.4	ENSCAFG00000005036	DPP6	DPP6	chr16	17435649	17435649	T	A	0|1	27,2	0.1	29
2	bad responder	intronic	ENSCAFG00000005036.4	ENSCAFG00000005036	DPP6	DPP6	chr16	17435655	17435655	A	G	0|1	24,2	0.111	26
2	bad responder	intergenic	ENSCAFG00000045126.1(dist=6101),ENSCAFG00000005081.4(dist=37569)	ENSCAFG00000045126	-	-	chr16	18222366	18222366	G	C	0|1	27,4	0.16	31
2	bad responder	intergenic	ENSCAFG00000045126.1(dist=6110),ENSCAFG00000005081.4(dist=37560)	ENSCAFG00000045126	-	-	chr16	18222375	18222375	G	C	0|1	26,5	0.167	31
2	bad responder	ncRNA_intronic	ENSCAFG00000046734.1	ENSCAFG00000046734	-	-	chr16	19007751	19007751	G	A	0/1	25,3	0.15	28
2	bad responder	intergenic	ENSCAFG00000029845.2(dist=3965),ENSCAFG00000005148.5(dist=5176)	ENSCAFG00000029845	-	-	chr16	19494406	19494406	G	A	0/1	21,4	0.177	25
2	bad responder	intronic	ENSCAFG00000032520.2	ENSCAFG00000032520	PTPRN2	PTPRN2	chr16	19910702	19910702	G	C	0/1	20,4	0.189	24
2	bad responder	intronic	ENSCAFG00000032520.2	ENSCAFG00000032520	PTPRN2	PTPRN2	chr16	20104353	20104353	C	T	0/1	33,5	0.179	38
2	bad responder	intronic	ENSCAFG00000032520.2	ENSCAFG00000032520	PTPRN2	PTPRN2	chr16	20400098	20400098	G	A	0/1	22,18	0.469	40
2	bad responder	downstream	ENSCAFG00000005240.5	ENSCAFG00000005240	DYNC2I1	WDR60	chr16	20859966	20859966	T	G	0|1	26,3	0.158	29
2	bad responder	downstream	ENSCAFG00000005240.5	ENSCAFG00000005240	DYNC2I1	WDR60	chr16	20859969	20859969	C	A	0|1	27,3	0.158	30
2	bad responder	intronic	ENSCAFG00000005301.4	ENSCAFG00000005301	PSD3	PSD3	chr16	21560858	21560858	G	A	0/1	13,8	0.4	21
2	bad responder	intergenic	ENSCAFG00000049250.1(dist=39215),ENSCAFG00000045032.1(dist=35950)	ENSCAFG00000049250	-	-	chr16	22091614	22091614	G	T	0|1	19,2	0.158	21
2	bad responder	intronic	ENSCAFG00000005337.4	ENSCAFG00000005337	CSGALNACT1	CSGALNACT1	chr16	22299456	22299456	T	C	0/1	26,3	0.143	29
2	bad responder	intronic	ENSCAFG00000005369.4	ENSCAFG00000005369	INTS10	INTS10	chr16	22569378	22569378	A	G	0/1	23,6	0.192	29
2	bad responder	intergenic	ENSCAFG00000005460.5(dist=66873),ENSCAFG00000032084.2(dist=38748)	ENSCAFG00000005460	-	-	chr16	23115220	23115220	T	A	0/1	27,3	0.15	30
2	bad responder	intronic	ENSCAFG00000005691.5	ENSCAFG00000005691	ANK1	ANK1	chr16	23854208	23854208	C	G	0|1	21,4	0.174	25
2	bad responder	intronic	ENSCAFG00000005691.5	ENSCAFG00000005691	ANK1	ANK1	chr16	23854211	23854211	C	G	0|1	21,4	0.174	25
2	bad responder	intergenic	ENSCAFG00000005828.3(dist=4058),ENSCAFG00000005832.5(dist=18992)	ENSCAFG00000005828	-	-	chr16	26036994	26036994	A	T	0|1	21,2	0.157	23
2	bad responder	intergenic	ENSCAFG00000005828.3(dist=4061),ENSCAFG00000005832.5(dist=18989)	ENSCAFG00000005828	-	-	chr16	26036997	26036997	A	T	0|1	21,2	0.158	23
2	bad responder	intergenic	ENSCAFG00000005832.5(dist=36349),ENSCAFG00000041966.1(dist=1767)	ENSCAFG00000005832	-	-	chr16	26212436	26212436	G	C	0/1	17,4	0.188	21
2	bad responder	intergenic	ENSCAFG00000047787.1(dist=114367),ENSCAFG00000028535.3(dist=379018)	ENSCAFG00000047787	-	-	chr16	27955487	27955487	C	T	0/1	39,4	0.129	43
2	bad responder	intergenic	ENSCAFG00000047787.1(dist=326405),ENSCAFG00000028535.3(dist=166980)	ENSCAFG00000047787	-	-	chr16	28167525	28167525	T	A	0/1	23,3	0.143	26
2	bad responder	ncRNA_intronic	ENSCAFG00000034225.2	ENSCAFG00000034225	-	-	chr16	28484835	28484835	C	A	0|1	41,4	0.139	45
2	bad responder	intergenic	ENSCAFG00000034225.2(dist=187682),ENSCAFG00000041824.1(dist=217463)	ENSCAFG00000034225	-	-	chr16	28674143	28674143	C	A	0/1	16,3	0.231	19
2	bad responder	intergenic	ENSCAFG00000034225.2(dist=312848),ENSCAFG00000041824.1(dist=92297)	ENSCAFG00000034225	-	-	chr16	28799309	28799309	C	A	0/1	16,4	0.248	20
2	bad responder	intronic	ENSCAFG00000006252.4	ENSCAFG00000006252	UNC5D	UNC5D	chr16	29405564	29405564	G	C	0/1	22,11	0.4	33
2	bad responder	intergenic	ENSCAFG00000044881.1(dist=382102),ENSCAFG00000049785.1(dist=302222)	ENSCAFG00000044881	-	-	chr16	30595716	30595716	A	C	0|1	31,3	0.167	34
2	bad responder	intergenic	ENSCAFG00000044881.1(dist=382105),ENSCAFG00000049785.1(dist=302219)	ENSCAFG00000044881	-	-	chr16	30595719	30595719	G	T	0|1	31,3	0.166	34
2	bad responder	intergenic	ENSCAFG00000044881.1(dist=499508),ENSCAFG00000049785.1(dist=184816)	ENSCAFG00000044881	-	-	chr16	30713122	30713122	G	A	0/1	10,11	0.438	21
2	bad responder	intergenic	ENSCAFG00000044881.1(dist=499984),ENSCAFG00000049785.1(dist=184340)	ENSCAFG00000044881	-	-	chr16	30713598	30713598	A	-	0/1	15,3	0.267	18
2	bad responder	intergenic	ENSCAFG00000044881.1(dist=499998),ENSCAFG00000049785.1(dist=184326)	ENSCAFG00000044881	-	-	chr16	30713612	30713612	-	T	0/1	15,3	0.267	18
2	bad responder	intergenic	ENSCAFG00000006291.4(dist=8772),ENSCAFG00000028434.1(dist=6845)	ENSCAFG00000006291	-	-	chr16	31153681	31153681	A	T	0|1	39,4	0.138	43
2	bad responder	intergenic	ENSCAFG00000048616.1(dist=138544),ENSCAFG00000047075.1(dist=52957)	ENSCAFG00000048616	-	-	chr16	31617556	31617556	A	T	0|1	29,4	0.199	33
2	bad responder	intronic	ENSCAFG00000006371.5	ENSCAFG00000006371	NRG1	NRG1	chr16	32621178	32621178	G	C	0/1	18,3	0.167	21
2	bad responder	intergenic	ENSCAFG00000034101.2(dist=8811),ENSCAFG00000006391.3(dist=69727)	ENSCAFG00000034101	-	-	chr16	33025186	33025186	G	A	0|1	16,5	0.266	21
2	bad responder	intergenic	ENSCAFG00000034101.2(dist=8812),ENSCAFG00000006391.3(dist=69726)	ENSCAFG00000034101	-	-	chr16	33025187	33025187	T	C	0|1	16,5	0.266	21
2	bad responder	intronic	ENSCAFG00000006442.5	ENSCAFG00000006442	PURG	PURG	chr16	33330722	33330722	G	A	0/1	17,3	0.176	20
2	bad responder	intronic	ENSCAFG00000006503.4	ENSCAFG00000006503	RBPMS	RBPMS	chr16	33874837	33874837	T	C	0/1	23,4	0.158	27
2	bad responder	intergenic	ENSCAFG00000006503.4(dist=43480),ENSCAFG00000032268.2(dist=61180)	ENSCAFG00000006503	-	-	chr16	34003766	34003766	G	T	0|1	19,3	0.187	22
2	bad responder	ncRNA_intronic	ENSCAFG00000036080.2	ENSCAFG00000036080	-	-	chr16	34488401	34488401	A	T	0/1	26,2	0.136	28
2	bad responder	intergenic	ENSCAFG00000036080.2(dist=16085),ENSCAFG00000048989.1(dist=224817)	ENSCAFG00000036080	-	-	chr16	34561307	34561307	G	A	0/1	21,3	0.148	24
2	bad responder	intergenic	ENSCAFG00000006632.5(dist=16255),ENSCAFG00000045986.1(dist=91224)	ENSCAFG00000006632	-	-	chr16	35056201	35056201	G	C	0|1	11,2	0.182	13
2	bad responder	intergenic	ENSCAFG00000030141.2(dist=78085),ENSCAFG00000006759.4(dist=113264)	ENSCAFG00000030141	-	-	chr16	36334982	36334982	C	T	0/1	7,18	0.667	25
2	bad responder	intergenic	ENSCAFG00000030141.2(dist=162644),ENSCAFG00000006759.4(dist=28705)	ENSCAFG00000030141	-	-	chr16	36419541	36419541	A	-	0/1	16,11	0.502	27
2	bad responder	intronic	ENSCAFG00000006759.4	ENSCAFG00000006759	TRMT9B	TRMT9B	chr16	36466534	36466534	-	T	0|1	15,3	0.2	18
2	bad responder	intronic	ENSCAFG00000006759.4	ENSCAFG00000006759	TRMT9B	TRMT9B	chr16	36466546	36466546	A	-	0|1	17,2	0.188	19
2	bad responder	intergenic	ENSCAFG00000006778.3(dist=351345),ENSCAFG00000006792.4(dist=68405)	ENSCAFG00000006778	-	-	chr16	37374136	37374136	A	C	0/1	15,2	0.214	17
2	bad responder	intronic	ENSCAFG00000006792.4	ENSCAFG00000006792	SGCZ	SGCZ	chr16	38190213	38190213	T	G	0|1	13,2	0.231	15
2	bad responder	intronic	ENSCAFG00000006792.4	ENSCAFG00000006792	SGCZ	SGCZ	chr16	38443368	38443368	A	C	0/1	15,4	0.25	19
2	bad responder	intergenic	ENSCAFG00000049172.1(dist=82793),ENSCAFG00000040979.1(dist=9186)	ENSCAFG00000049172	-	-	chr16	40040044	40040044	-	A	0/1	18,9	0.381	27
2	bad responder	intergenic	ENSCAFG00000036231.2(dist=344952),ENSCAFG00000043855.1(dist=5315)	ENSCAFG00000036231	-	-	chr16	42451123	42451123	A	T	0/1	11,15	0.571	26
2	bad responder	intergenic	ENSCAFG00000043855.1(dist=101892),ENSCAFG00000029549.2(dist=133654)	ENSCAFG00000043855	-	-	chr16	42712622	42712622	A	C	0/1	9,15	0.611	24
2	bad responder	intergenic	ENSCAFG00000007236.4(dist=6019),ENSCAFG00000025203.5(dist=85537)	ENSCAFG00000007236	-	-	chr16	43006070	43006070	A	C	0/1	12,22	0.577	34
2	bad responder	intergenic	ENSCAFG00000041780.1(dist=12219),ENSCAFG00000046678.1(dist=358066)	ENSCAFG00000041780	-	-	chr16	43459865	43459865	G	A	0|1	19,3	0.167	22
2	bad responder	intergenic	ENSCAFG00000041780.1(dist=12220),ENSCAFG00000046678.1(dist=358065)	ENSCAFG00000041780	-	-	chr16	43459866	43459866	T	C	0|1	19,3	0.167	22
2	bad responder	intergenic	ENSCAFG00000041780.1(dist=321070),ENSCAFG00000046678.1(dist=49215)	ENSCAFG00000041780	-	-	chr16	43768716	43768716	A	G	0/1	18,13	0.458	31
2	bad responder	intergenic	ENSCAFG00000046678.1(dist=80059),ENSCAFG00000042312.1(dist=43505)	ENSCAFG00000046678	-	-	chr16	43922917	43922917	G	A	0/1	17,7	0.3	24
2	bad responder	intronic	ENSCAFG00000007475.6	ENSCAFG00000007475	SORBS2	SORBS2	chr16	44749039	44749039	G	T	0|1	17,2	0.167	19
2	bad responder	intronic	ENSCAFG00000007475.6	ENSCAFG00000007475	SORBS2	SORBS2	chr16	44862524	44862524	A	G	0/1	17,3	0.188	20
2	bad responder	intronic	ENSCAFG00000007475.6	ENSCAFG00000007475	SORBS2	SORBS2	chr16	44875197	44875197	A	T	0/1	33,5	0.167	38
2	bad responder	intergenic	ENSCAFG00000007662.4(dist=13028),ENSCAFG00000007735.4(dist=2669)	ENSCAFG00000007662	-	-	chr16	45817998	45817998	G	C	0|1	22,3	0.192	25
2	bad responder	intronic	ENSCAFG00000007793.4	ENSCAFG00000007793	ENPP6	ENPP6	chr16	46347567	46347567	G	C	0/1	23,3	0.199	26
2	bad responder	intronic	ENSCAFG00000007807.5	ENSCAFG00000007807	STOX2	STOX2	chr16	46545882	46545882	A	T	0|1	32,3	0.125	35
2	bad responder	intronic	ENSCAFG00000007807.5	ENSCAFG00000007807	STOX2	STOX2	chr16	46545883	46545883	A	T	0|1	32,3	0.125	35
2	bad responder	intergenic	ENSCAFG00000007880.4(dist=25195),ENSCAFG00000045369.1(dist=26351)	ENSCAFG00000007880	-	-	chr16	46776075	46776075	C	G	0/1	25,5	0.227	30
2	bad responder	intergenic	ENSCAFG00000045369.1(dist=23487),ENSCAFG00000007884.3(dist=8153)	ENSCAFG00000045369	-	-	chr16	46837136	46837136	T	C	0|1	18,2	0.167	20
2	bad responder	intergenic	ENSCAFG00000045369.1(dist=23488),ENSCAFG00000007884.3(dist=8152)	ENSCAFG00000045369	-	-	chr16	46837137	46837137	G	A	0|1	18,2	0.167	20
2	bad responder	intergenic	ENSCAFG00000007906.5(dist=30642),ENSCAFG00000043292.1(dist=1854)	ENSCAFG00000007906	-	-	chr16	47216142	47216142	G	-	0|1	23,3	0.18	26
2	bad responder	intergenic	ENSCAFG00000007906.5(dist=30646),ENSCAFG00000043292.1(dist=1850)	ENSCAFG00000007906	-	-	chr16	47216146	47216146	-	C	0|1	23,3	0.181	26
2	bad responder	intronic	ENSCAFG00000008123.5	ENSCAFG00000008123	TENM3	TENM3	chr16	47443413	47443413	A	C	0|1	17,2	0.143	19
2	bad responder	intronic	ENSCAFG00000008123.5	ENSCAFG00000008123	TENM3	TENM3	chr16	47443418	47443418	G	T	0|1	15,2	0.143	17
2	bad responder	ncRNA_intronic	ENSCAFG00000037207.2	ENSCAFG00000037207	-	-	chr16	48388275	48388275	G	A	0/1	23,16	0.379	39
2	bad responder	intergenic	ENSCAFG00000044307.1(dist=110066),ENSCAFG00000046895.1(dist=169710)	ENSCAFG00000044307	-	-	chr16	48512137	48512137	G	A	0/1	7,23	0.636	30
2	bad responder	intergenic	ENSCAFG00000044369.1(dist=299922),ENSCAFG00000042580.1(dist=394686)	ENSCAFG00000044369	-	-	chr16	49591817	49591817	T	C	0/1	15,7	0.353	22
2	bad responder	intergenic	ENSCAFG00000044369.1(dist=308625),ENSCAFG00000042580.1(dist=385983)	ENSCAFG00000044369	-	-	chr16	49600520	49600520	T	C	0/1	18,13	0.48	31
2	bad responder	intergenic	ENSCAFG00000044369.1(dist=327175),ENSCAFG00000042580.1(dist=367433)	ENSCAFG00000044369	-	-	chr16	49619070	49619070	T	G	0/1	12,12	0.5	24
2	bad responder	ncRNA_intronic	ENSCAFG00000046295.1	ENSCAFG00000046295	-	-	chr16	50065610	50065610	C	A	0/1	12,15	0.526	27
2	bad responder	intergenic	ENSCAFG00000046706.1(dist=89698),ENSCAFG00000025904.1(dist=258422)	ENSCAFG00000046706	-	-	chr16	50365627	50365627	A	T	0/1	21,3	0.221	24
2	bad responder	intergenic	ENSCAFG00000046706.1(dist=247580),ENSCAFG00000025904.1(dist=100540)	ENSCAFG00000046706	-	-	chr16	50523509	50523509	C	T	0/1	19,14	0.458	33
2	bad responder	intergenic	ENSCAFG00000025904.1(dist=95629),ENSCAFG00000042359.1(dist=52257)	ENSCAFG00000025904	-	-	chr16	50719801	50719801	G	-	0/1	84,16	0.167	100
2	bad responder	intergenic	ENSCAFG00000025904.1(dist=95761),ENSCAFG00000042359.1(dist=52125)	ENSCAFG00000025904	-	-	chr16	50719933	50719933	-	TT	0/1	77,14	0.115	91
2	bad responder	intergenic	ENSCAFG00000025904.1(dist=95808),ENSCAFG00000042359.1(dist=52078)	ENSCAFG00000025904	-	-	chr16	50719980	50719980	A	T	0/1	76,12	0.135	88
2	bad responder	intergenic	ENSCAFG00000025904.1(dist=100983),ENSCAFG00000042359.1(dist=46903)	ENSCAFG00000025904	-	-	chr16	50725155	50725155	G	C	0/1	148,17	0.113	165
2	bad responder	intergenic	ENSCAFG00000025904.1(dist=105639),ENSCAFG00000042359.1(dist=42247)	ENSCAFG00000025904	-	-	chr16	50729811	50729811	T	C	0/1	126,16	0.101	142
2	bad responder	ncRNA_intronic	ENSCAFG00000042359.1	ENSCAFG00000042359	-	-	chr16	50775476	50775476	T	C	0/1	55,18	0.22	73
2	bad responder	intergenic	ENSCAFG00000042359.1(dist=108216),ENSCAFG00000040445.2(dist=143195)	ENSCAFG00000042359	-	-	chr16	50892654	50892654	A	C	0/1	12,5	0.312	17
2	bad responder	intergenic	ENSCAFG00000040445.2(dist=1406),ENSCAFG00000045161.1(dist=538497)	ENSCAFG00000040445	-	-	chr16	51041378	51041378	C	T	0/1	13,4	0.267	17
2	bad responder	intergenic	ENSCAFG00000040445.2(dist=434788),ENSCAFG00000045161.1(dist=105115)	ENSCAFG00000040445	-	-	chr16	51474760	51474760	T	A	0/1	12,7	0.375	19
2	bad responder	intergenic	ENSCAFG00000045161.1(dist=52527),ENSCAFG00000042260.1(dist=248414)	ENSCAFG00000045161	-	-	chr16	51633923	51633923	C	T	0/1	21,4	0.158	25
2	bad responder	intergenic	ENSCAFG00000045161.1(dist=163168),ENSCAFG00000042260.1(dist=137773)	ENSCAFG00000045161	-	-	chr16	51744564	51744564	G	A	0/1	15,9	0.389	24
2	bad responder	intergenic	ENSCAFG00000049688.1(dist=8082),ENSCAFG00000025123.2(dist=23089)	ENSCAFG00000049688	-	-	chr16	54064435	54064435	C	T	0/1	69,25	0.282	94
2	bad responder	intergenic	ENSCAFG00000045217.1(dist=92358),ENSCAFG00000013667.4(dist=99630)	ENSCAFG00000045217	-	-	chr16	54193805	54193805	C	A	0/1	111,27	0.179	138
2	bad responder	intergenic	ENSCAFG00000045217.1(dist=95963),ENSCAFG00000013667.4(dist=96025)	ENSCAFG00000045217	-	-	chr16	54197410	54197410	T	A	0/1	56,14	0.217	70
2	bad responder	intergenic	ENSCAFG00000047251.1(dist=503853),ENSCAFG00000048089.1(dist=3185)	ENSCAFG00000047251	-	-	chr16	54888320	54888320	A	G	0|1	35,3	0.148	38
2	bad responder	intergenic	ENSCAFG00000047251.1(dist=503856),ENSCAFG00000048089.1(dist=3182)	ENSCAFG00000047251	-	-	chr16	54888323	54888323	C	T	0|1	36,3	0.148	39
2	bad responder	intergenic	ENSCAFG00000044458.1(dist=46948),ENSCAFG00000045742.1(dist=13148)	ENSCAFG00000044458	-	-	chr16	54976585	54976585	C	G	0/1	29,8	0.227	37
2	bad responder	intronic	ENSCAFG00000008686.5	ENSCAFG00000008686	CSMD1	CSMD1	chr16	56575411	56575411	A	T	0/1	14,7	0.375	21
2	bad responder	intergenic	ENSCAFG00000008686.5(dist=16077),ENSCAFG00000036633.2(dist=28223)	ENSCAFG00000008686	-	-	chr16	56689756	56689756	T	A	0|1	29,5	0.185	34
2	bad responder	intergenic	ENSCAFG00000008686.5(dist=16082),ENSCAFG00000036633.2(dist=28218)	ENSCAFG00000008686	-	-	chr16	56689761	56689761	T	A	0|1	28,5	0.192	33
2	bad responder	intergenic	ENSCAFG00000036633.2(dist=101437),ENSCAFG00000047446.1(dist=170198)	ENSCAFG00000036633	-	-	chr16	56841105	56841105	C	-	0/1	5,10	0.615	15
2	bad responder	ncRNA_intronic	ENSCAFG00000045444.1	ENSCAFG00000045444	-	-	chr16	57118317	57118317	G	T	0/1	12,9	0.412	21
2	bad responder	intergenic	ENSCAFG00000048663.1(dist=35950),ENSCAFG00000043226.1(dist=2306)	ENSCAFG00000048663	-	-	chr16	57182457	57182457	G	T	0/1	26,14	0.357	40
2	bad responder	intergenic	ENSCAFG00000046075.1(dist=301471),ENSCAFG00000047378.1(dist=64621)	ENSCAFG00000046075	-	-	chr16	57756556	57756556	C	T	0/1	19,3	0.167	22
2	bad responder	intergenic	ENSCAFG00000032247.2(dist=17646),ENSCAFG00000024886.1(dist=8605)	ENSCAFG00000032247	-	-	chr16	58985358	58985358	G	A	0|1	24,2	0.142	26
2	bad responder	intergenic	ENSCAFG00000032247.2(dist=17649),ENSCAFG00000024886.1(dist=8602)	ENSCAFG00000032247	-	-	chr16	58985361	58985361	T	C	0|1	25,2	0.143	27
2	bad responder	intergenic	ENSCAFG00000047089.1(dist=1963),ENSCAFG00000049654.1(dist=75825)	ENSCAFG00000047089	-	-	chr16	59304956	59304956	T	C	0/1	15,4	0.293	19
2	bad responder	intergenic	ENSCAFG00000030976.2(dist=12253),ENSCAFG00000040867.2(dist=37844)	ENSCAFG00000030976	-	-	chr16	59491721	59491721	A	G	0/1	38,14	0.297	52
2	bad responder	intergenic	ENSCAFG00000042100.1(dist=59070),ENSCAFG00000035189.2(dist=125064)	ENSCAFG00000042100	-	-	chr17	332451	332451	C	T	0/1	15,3	0.176	18
2	bad responder	intergenic	ENSCAFG00000047413.1(dist=7198),ENSCAFG00000041953.1(dist=89742)	ENSCAFG00000047413	-	-	chr17	487633	487633	G	A	0/1	8,12	0.589	20
2	bad responder	intergenic	ENSCAFG00000047413.1(dist=32116),ENSCAFG00000041953.1(dist=64824)	ENSCAFG00000047413	-	-	chr17	512551	512551	C	T	0/1	10,14	0.579	24
2	bad responder	intergenic	ENSCAFG00000035080.2(dist=16026),ENSCAFG00000046903.1(dist=15884)	ENSCAFG00000035080	-	-	chr17	621024	621024	C	T	0/1	7,12	0.625	19
2	bad responder	intergenic	ENSCAFG00000046903.1(dist=30607),ENSCAFG00000003214.4(dist=15383)	ENSCAFG00000046903	-	-	chr17	668975	668975	A	G	0/1	13,3	0.273	16
2	bad responder	intergenic	ENSCAFG00000046903.1(dist=35707),ENSCAFG00000003214.4(dist=10283)	ENSCAFG00000046903	-	-	chr17	674075	674075	G	C	0/1	26,2	0.105	28
2	bad responder	intronic	ENSCAFG00000003228.4	ENSCAFG00000003228	PXDN	PXDN	chr17	874587	874587	T	A	0|1	39,4	0.125	43
2	bad responder	intergenic	ENSCAFG00000049598.1(dist=2251),ENSCAFG00000045632.1(dist=17693)	ENSCAFG00000049598	-	-	chr17	893495	893495	A	T	0/1	30,3	0.159	33
2	bad responder	intergenic	ENSCAFG00000043829.1(dist=54754),ENSCAFG00000042233.1(dist=120069)	ENSCAFG00000043829	-	-	chr17	1233395	1233395	T	A	0|1	15,3	0.2	18
2	bad responder	intergenic	ENSCAFG00000043829.1(dist=75970),ENSCAFG00000042233.1(dist=98853)	ENSCAFG00000043829	-	-	chr17	1254611	1254611	T	C	0/1	23,4	0.249	27
2	bad responder	intergenic	ENSCAFG00000042185.1(dist=71529),ENSCAFG00000041862.1(dist=112604)	ENSCAFG00000042185	-	-	chr17	3650150	3650150	C	A	0/1	11,4	0.333	15
2	bad responder	ncRNA_intronic	ENSCAFG00000048368.1	ENSCAFG00000048368	-	-	chr17	3962388	3962388	A	T	0/1	25,3	0.167	28
2	bad responder	ncRNA_intronic	ENSCAFG00000048368.1	ENSCAFG00000048368	-	-	chr17	3972178	3972178	T	C	0|1	16,2	0.186	18
2	bad responder	intergenic	ENSCAFG00000047482.1(dist=148648),ENSCAFG00000003293.3(dist=246074)	ENSCAFG00000047482	-	-	chr17	4241883	4241883	G	C	0|1	24,3	0.15	27
2	bad responder	intergenic	ENSCAFG00000047482.1(dist=148651),ENSCAFG00000003293.3(dist=246071)	ENSCAFG00000047482	-	-	chr17	4241886	4241886	G	C	0|1	24,3	0.15	27
2	bad responder	intergenic	ENSCAFG00000047482.1(dist=237250),ENSCAFG00000003293.3(dist=157472)	ENSCAFG00000047482	-	-	chr17	4330485	4330485	G	C	0|1	25,4	0.2	29
2	bad responder	intergenic	ENSCAFG00000047482.1(dist=237251),ENSCAFG00000003293.3(dist=157471)	ENSCAFG00000047482	-	-	chr17	4330486	4330486	G	C	0|1	25,4	0.2	29
2	bad responder	intergenic	ENSCAFG00000003300.4(dist=6758),ENSCAFG00000044111.1(dist=70301)	ENSCAFG00000003300	-	-	chr17	4669591	4669591	T	C	0/1	19,4	0.176	23
2	bad responder	intergenic	ENSCAFG00000044111.1(dist=8509),ENSCAFG00000041645.1(dist=4538)	ENSCAFG00000044111	-	-	chr17	4764155	4764155	G	C	0/1	33,4	0.148	37
2	bad responder	ncRNA_intronic	ENSCAFG00000044825.1	ENSCAFG00000044825	-	-	chr17	5379924	5379924	G	C	0/1	23,3	0.136	26
2	bad responder	intergenic	ENSCAFG00000020813.1(dist=98517),ENSCAFG00000043926.1(dist=26973)	ENSCAFG00000020813	-	-	chr17	5510736	5510736	C	T	0/1	16,5	0.313	21
2	bad responder	intronic	ENSCAFG00000003370.5	ENSCAFG00000003370	ASAP2	ASAP2	chr17	6398344	6398344	T	C	0/1	21,3	0.149	24
2	bad responder	intronic	ENSCAFG00000003405.4	ENSCAFG00000003405	KLF11	KLF11	chr17	7039623	7039623	C	G	0|1	34,4	0.133	38
2	bad responder	intronic	ENSCAFG00000031890.2	ENSCAFG00000031890	HPCAL1	HPCAL1	chr17	7318868	7318868	C	G	0/1	24,3	0.157	27
2	bad responder	intergenic	ENSCAFG00000003549.4(dist=38256),ENSCAFG00000003579.5(dist=35171)	ENSCAFG00000003549	-	-	chr17	8216963	8216963	C	A	0/1	29,3	0.124	32
2	bad responder	exonic	ENSCAFG00000003579.5	ENSCAFG00000003579	GREB1	GREB1	chr17	8280098	8280098	C	T	0/1	17,12	0.391	29
2	bad responder	downstream	ENSCAFG00000003686.4	ENSCAFG00000003686	DDX1	DDX1	chr17	11467454	11467454	A	C	0|1	20,5	0.316	25
2	bad responder	downstream	ENSCAFG00000003686.4	ENSCAFG00000003686	DDX1	DDX1	chr17	11467459	11467459	G	T	0|1	20,5	0.316	25
2	bad responder	intergenic	ENSCAFG00000044538.1(dist=178609),ENSCAFG00000036715.2(dist=74351)	ENSCAFG00000044538	-	-	chr17	12054390	12054390	G	C	0|1	18,2	0.176	20
2	bad responder	intronic	ENSCAFG00000003717.4	ENSCAFG00000003717	CYRIA	CYRIA	chr17	12253724	12253724	A	T	0|1	21,5	0.25	26
2	bad responder	intronic	ENSCAFG00000003717.4	ENSCAFG00000003717	CYRIA	CYRIA	chr17	12253725	12253725	A	T	0|1	21,5	0.25	26
2	bad responder	intergenic	ENSCAFG00000037581.2(dist=13129),ENSCAFG00000042936.1(dist=43363)	ENSCAFG00000037581	-	-	chr17	12371000	12371000	A	T	0|1	33,4	0.154	37
2	bad responder	intergenic	ENSCAFG00000037581.2(dist=13134),ENSCAFG00000042936.1(dist=43358)	ENSCAFG00000037581	-	-	chr17	12371005	12371005	A	T	0|1	33,4	0.16	37
2	bad responder	ncRNA_intronic	ENSCAFG00000046579.1	ENSCAFG00000046579	-	-	chr17	12768911	12768911	-	A	0/1	14,5	0.284	19
2	bad responder	intergenic	ENSCAFG00000003752.2(dist=36676),ENSCAFG00000042537.1(dist=158530)	ENSCAFG00000003752	-	-	chr17	13374525	13374525	G	A	0|1	20,2	0.149	22
2	bad responder	intergenic	ENSCAFG00000003752.2(dist=51299),ENSCAFG00000042537.1(dist=143907)	ENSCAFG00000003752	-	-	chr17	13389148	13389148	A	T	0|1	29,3	0.153	32
2	bad responder	intergenic	ENSCAFG00000035353.2(dist=8558),ENSCAFG00000047868.1(dist=24564)	ENSCAFG00000035353	-	-	chr17	14094219	14094219	G	A	0/1	23,4	0.149	27
2	bad responder	intergenic	ENSCAFG00000003775.4(dist=183796),ENSCAFG00000023413.3(dist=172951)	ENSCAFG00000003775	-	-	chr17	14773024	14773024	T	C	0/1	17,5	0.288	22
2	bad responder	intergenic	ENSCAFG00000003775.4(dist=302085),ENSCAFG00000023413.3(dist=54662)	ENSCAFG00000003775	-	-	chr17	14891313	14891313	G	A	0|1	39,7	0.161	46
2	bad responder	intronic	ENSCAFG00000003791.5	ENSCAFG00000003791	WDR35	WDR35	chr17	15022495	15022495	G	T	0|1	17,2	0.187	19
2	bad responder	intronic	ENSCAFG00000003791.5	ENSCAFG00000003791	WDR35	WDR35	chr17	15022496	15022496	A	C	0|1	17,2	0.187	19
2	bad responder	intergenic	ENSCAFG00000003829.5(dist=7749),ENSCAFG00000035304.2(dist=33707)	ENSCAFG00000003829	-	-	chr17	15088501	15088501	G	A	0|1	18,3	0.143	21
2	bad responder	intronic	ENSCAFG00000003839.5	ENSCAFG00000003839	PUM2	PUM2	chr17	15307664	15307664	C	T	0/1	21,3	0.158	24
2	bad responder	intronic	ENSCAFG00000003845.4	ENSCAFG00000003845	-	-	chr17	15410590	15410590	G	A	0/1	25,4	0.167	29
2	bad responder	intronic	ENSCAFG00000003852.5	ENSCAFG00000003852	HS1BP3	HS1BP3	chr17	15622267	15622267	A	T	0|1	22,5	0.238	27
2	bad responder	intronic	ENSCAFG00000003852.5	ENSCAFG00000003852	HS1BP3	HS1BP3	chr17	15622272	15622272	A	T	0|1	24,5	0.217	29
2	bad responder	intergenic	ENSCAFG00000030832.2(dist=46829),ENSCAFG00000045098.1(dist=178769)	ENSCAFG00000030832	-	-	chr17	16049442	16049442	G	A	0/1	25,4	0.142	29
2	bad responder	intergenic	ENSCAFG00000042693.1(dist=41503),ENSCAFG00000033149.2(dist=200583)	ENSCAFG00000042693	-	-	chr17	17037953	17037953	T	G	0/1	18,5	0.211	23
2	bad responder	intergenic	ENSCAFG00000037555.2(dist=15225),ENSCAFG00000048475.1(dist=1981)	ENSCAFG00000037555	-	-	chr17	17720443	17720443	C	A	0/1	28,4	0.161	32
2	bad responder	intergenic	ENSCAFG00000048475.1(dist=15386),ENSCAFG00000036545.2(dist=17392)	ENSCAFG00000048475	-	-	chr17	17745546	17745546	T	G	0/1	14,8	0.35	22
2	bad responder	intronic	ENSCAFG00000003916.5	ENSCAFG00000003916	KLHL29	KLHL29	chr17	18027661	18027661	A	T	0|1	22,2	0.158	24
2	bad responder	intronic	ENSCAFG00000003916.5	ENSCAFG00000003916	KLHL29	KLHL29	chr17	18076930	18076930	A	G	0/1	12,3	0.248	15
2	bad responder	intronic	ENSCAFG00000003916.5	ENSCAFG00000003916	KLHL29	KLHL29	chr17	18121749	18121749	T	G	0|1	32,3	0.148	35
2	bad responder	intronic	ENSCAFG00000003916.5	ENSCAFG00000003916	KLHL29	KLHL29	chr17	18121752	18121752	C	A	0|1	32,3	0.148	35
2	bad responder	intronic	ENSCAFG00000003916.5	ENSCAFG00000003916	KLHL29	KLHL29	chr17	18138283	18138283	A	T	0/1	27,3	0.182	30
2	bad responder	intronic	ENSCAFG00000003916.5	ENSCAFG00000003916	KLHL29	KLHL29	chr17	18204733	18204733	G	A	0/1	16,12	0.419	28
2	bad responder	intronic	ENSCAFG00000003957.4,ENSCAFG00000004019.4	ENSCAFG00000003957	SF3B6	SF3B6	chr17	18691878	18691878	A	C	0|1	34,4	0.142	38
2	bad responder	intronic	ENSCAFG00000003957.4,ENSCAFG00000004019.4	ENSCAFG00000003957	SF3B6	SF3B6	chr17	18691883	18691883	G	T	0|1	34,4	0.143	38
2	bad responder	intergenic	ENSCAFG00000004019.4(dist=19144),ENSCAFG00000039001.2(dist=28764)	ENSCAFG00000004019	-	-	chr17	18775258	18775258	A	C	0/1	20,5	0.226	25
2	bad responder	intergenic	ENSCAFG00000039001.2(dist=12651),ENSCAFG00000044180.1(dist=25101)	ENSCAFG00000039001	-	-	chr17	18826445	18826445	A	T	0|1	25,2	0.099	27
2	bad responder	intronic	ENSCAFG00000004075.5	ENSCAFG00000004075	NCOA1	NCOA1	chr17	18919881	18919881	C	T	0|1	15,2	0.132	17
2	bad responder	intronic	ENSCAFG00000004075.5	ENSCAFG00000004075	NCOA1	NCOA1	chr17	18919882	18919882	A	G	0|1	15,2	0.132	17
2	bad responder	intronic	ENSCAFG00000004241.5	ENSCAFG00000004241	ASXL2	ASXL2	chr17	20006029	20006029	C	G	0/1	27,3	0.16	30
2	bad responder	intronic	ENSCAFG00000023367.3	ENSCAFG00000023367	KCNK3	KCNK3	chr17	20743224	20743224	T	A	0/1	32,3	0.16	35
2	bad responder	intergenic	ENSCAFG00000005150.4(dist=12510),ENSCAFG00000023355.3(dist=2469)	ENSCAFG00000005150	-	-	chr17	21472445	21472445	A	G	0/1	34,10	0.235	44
2	bad responder	exonic	ENSCAFG00000023355.3	ENSCAFG00000023355	-	C2orf16	chr17	21477269	21477269	G	A	0/1	36,8	0.216	44
2	bad responder	intergenic	ENSCAFG00000005212.4(dist=65801),ENSCAFG00000005225.5(dist=13078)	ENSCAFG00000005212	-	-	chr17	22427573	22427573	T	G	0|1	36,4	0.172	40
2	bad responder	intergenic	ENSCAFG00000005212.4(dist=65806),ENSCAFG00000005225.5(dist=13073)	ENSCAFG00000005212	-	-	chr17	22427578	22427578	C	A	0|1	37,4	0.166	41
2	bad responder	intergenic	ENSCAFG00000005253.5(dist=5596),ENSCAFG00000005258.4(dist=31672)	ENSCAFG00000005253	-	-	chr17	22817795	22817795	A	G	0|1	22,3	0.19	25
2	bad responder	intergenic	ENSCAFG00000005253.5(dist=5597),ENSCAFG00000005258.4(dist=31671)	ENSCAFG00000005253	-	-	chr17	22817796	22817796	C	T	0|1	22,3	0.19	25
2	bad responder	intronic	ENSCAFG00000005283.4	ENSCAFG00000005283	CLIP4	CLIP4	chr17	22994873	22994873	A	C	0|1	30,8	0.269	38
2	bad responder	intronic	ENSCAFG00000005283.4	ENSCAFG00000005283	CLIP4	CLIP4	chr17	22994876	22994876	G	T	0|1	29,8	0.269	37
2	bad responder	intronic	ENSCAFG00000005297.4	ENSCAFG00000005297	ALK	ALK	chr17	23065598	23065598	A	C	0|1	32,2	0.12	34
2	bad responder	intronic	ENSCAFG00000005297.4	ENSCAFG00000005297	ALK	ALK	chr17	23065601	23065601	G	T	0|1	32,2	0.119	34
2	bad responder	intronic	ENSCAFG00000005297.4	ENSCAFG00000005297	ALK	ALK	chr17	23470633	23470633	C	T	0/1	11,5	0.285	16
2	bad responder	intronic	ENSCAFG00000005297.4	ENSCAFG00000005297	ALK	ALK	chr17	23510531	23510531	A	T	0/1	35,3	0.111	38
2	bad responder	upstream	ENSCAFG00000038022.2	ENSCAFG00000038022	-	-	chr17	23913695	23913695	G	C	0|1	38,3	0.138	41
2	bad responder	intergenic	ENSCAFG00000005328.5(dist=6288),ENSCAFG00000005335.5(dist=27882)	ENSCAFG00000005328	-	-	chr17	24747177	24747177	A	G	0/1	16,3	0.176	19
2	bad responder	intronic	ENSCAFG00000005609.5	ENSCAFG00000005609	XDH	XDH	chr17	24949089	24949089	A	G	0/1	21,3	0.185	24
2	bad responder	intergenic	ENSCAFG00000005875.6(dist=7355),ENSCAFG00000046227.1(dist=10993)	ENSCAFG00000005875	-	-	chr17	26695802	26695802	C	T	0|1	34,3	0.148	37
2	bad responder	intergenic	ENSCAFG00000005875.6(dist=7360),ENSCAFG00000046227.1(dist=10988)	ENSCAFG00000005875	-	-	chr17	26695807	26695807	A	G	0|1	34,3	0.148	37
2	bad responder	intronic	ENSCAFG00000006041.4,ENSCAFG00000006067.5	ENSCAFG00000006041	-	GPATCH11	chr17	29550418	29550418	A	C	0|1	14,3	0.214	17
2	bad responder	intronic	ENSCAFG00000006041.4,ENSCAFG00000006067.5	ENSCAFG00000006041	-	GPATCH11	chr17	29550423	29550423	G	T	0|1	14,2	0.214	16
2	bad responder	intergenic	ENSCAFG00000006145.5(dist=42824),ENSCAFG00000045765.1(dist=2994)	ENSCAFG00000006145	-	-	chr17	29784045	29784045	T	A	0|1	16,3	0.2	19
2	bad responder	intergenic	ENSCAFG00000006145.5(dist=42825),ENSCAFG00000045765.1(dist=2993)	ENSCAFG00000006145	-	-	chr17	29784046	29784046	T	A	0|1	16,3	0.2	19
2	bad responder	UTR3	ENSCAFG00000006426.5(ENSCAFT00000087334.1:c.*29T>C)	ENSCAFG00000006426	MAP4K3	MAP4K3	chr17	31261101	31261101	A	G	0/1	21,3	0.15	24
2	bad responder	intergenic	ENSCAFG00000023592.4(dist=102910),ENSCAFG00000040995.1(dist=549499)	ENSCAFG00000023592	-	-	chr17	32410610	32410613	AGAG	-	0/1	28,4	0.129	32
2	bad responder	intergenic	ENSCAFG00000023592.4(dist=104266),ENSCAFG00000040995.1(dist=548146)	ENSCAFG00000023592	-	-	chr17	32411966	32411966	C	A	0/1	6,13	0.688	19
2	bad responder	intergenic	ENSCAFG00000023592.4(dist=567237),ENSCAFG00000040995.1(dist=85175)	ENSCAFG00000023592	-	-	chr17	32874937	32874937	A	T	0|1	27,2	0.091	29
2	bad responder	intergenic	ENSCAFG00000006477.4(dist=169572),ENSCAFG00000037870.2(dist=73963)	ENSCAFG00000006477	-	-	chr17	33487586	33487586	-	TC	0|1	30,3	0.153	33
2	bad responder	intergenic	ENSCAFG00000006477.4(dist=169577),ENSCAFG00000037870.2(dist=73957)	ENSCAFG00000006477	-	-	chr17	33487591	33487592	GA	-	0|1	31,3	0.153	34
2	bad responder	intergenic	ENSCAFG00000045766.1(dist=2757),ENSCAFG00000006520.4(dist=28810)	ENSCAFG00000045766	-	-	chr17	33993451	33993451	T	G	0|1	21,4	0.211	25
2	bad responder	intronic	ENSCAFG00000006920.4	ENSCAFG00000006920	KCNIP3	FAHD2A	chr17	34716382	34716382	A	C	0|1	19,6	0.286	25
2	bad responder	intronic	ENSCAFG00000006920.4	ENSCAFG00000006920	KCNIP3	FAHD2A	chr17	34716387	34716387	G	T	0|1	20,6	0.286	26
2	bad responder	intronic	ENSCAFG00000007131.5	ENSCAFG00000007131	MERTK	MERTK	chr17	36419430	36419430	A	C	0/1	24,3	0.158	27
2	bad responder	intronic	ENSCAFG00000007149.5	ENSCAFG00000007149	FBLN7	FBLN7	chr17	36540167	36540167	A	G	0|1	39,3	0.129	42
2	bad responder	intronic	ENSCAFG00000007149.5	ENSCAFG00000007149	FBLN7	FBLN7	chr17	36540168	36540168	C	T	0|1	39,3	0.129	42
2	bad responder	intronic	ENSCAFG00000007169.4	ENSCAFG00000007169	TTL	TTL	chr17	36764818	36764818	A	T	0/1	42,3	0.094	45
2	bad responder	intronic	ENSCAFG00000007263.5	ENSCAFG00000007263	IL37	IL37	chr17	36998169	36998169	A	G	0|1	22,2	0.165	24
2	bad responder	intergenic	ENSCAFG00000007263.5(dist=32022),ENSCAFG00000029047.2(dist=11486)	ENSCAFG00000007263	-	-	chr17	37132823	37132823	A	T	0/1	17,3	0.235	20
2	bad responder	intronic	ENSCAFG00000007292.5	ENSCAFG00000007292	PSD4	PSD4	chr17	37264996	37264996	T	C	0/1	21,4	0.141	25
2	bad responder	intronic	ENSCAFG00000031333.2	ENSCAFG00000031333	-	GNLY	chr17	39375294	39375294	T	C	0/1	20,7	0.263	27
2	bad responder	intronic	ENSCAFG00000007801.4	ENSCAFG00000007801	ELMOD3	ELMOD3	chr17	39659895	39659895	T	A	0/1	31,6	0.185	37
2	bad responder	intronic	ENSCAFG00000007876.5	ENSCAFG00000007876	TRABD2A	TRABD2A	chr17	40088363	40088363	A	G	0|1	31,3	0.167	34
2	bad responder	intronic	ENSCAFG00000007876.5	ENSCAFG00000007876	TRABD2A	TRABD2A	chr17	40088366	40088366	C	T	0|1	31,3	0.166	34
2	bad responder	intergenic	ENSCAFG00000007987.4(dist=94652),ENSCAFG00000045503.1(dist=28041)	ENSCAFG00000007987	-	-	chr17	40519363	40519363	A	G	0/1	12,16	0.546	28
2	bad responder	intergenic	ENSCAFG00000043732.1(dist=88000),ENSCAFG00000048908.1(dist=37125)	ENSCAFG00000043732	-	-	chr17	40869263	40869263	C	T	0/1	21,4	0.158	25
2	bad responder	intergenic	ENSCAFG00000045352.1(dist=159445),ENSCAFG00000047122.1(dist=273423)	ENSCAFG00000045352	-	-	chr17	41080519	41080519	A	G	0|1	32,5	0.214	37
2	bad responder	intergenic	ENSCAFG00000045352.1(dist=159446),ENSCAFG00000047122.1(dist=273422)	ENSCAFG00000045352	-	-	chr17	41080520	41080520	C	T	0|1	32,5	0.214	37
2	bad responder	intergenic	ENSCAFG00000031309.2(dist=175862),ENSCAFG00000027255.1(dist=131415)	ENSCAFG00000031309	-	-	chr17	42359235	42359235	C	A	0/1	18,13	0.478	31
2	bad responder	ncRNA_intronic	ENSCAFG00000046531.1	ENSCAFG00000046531	-	-	chr17	43135444	43135444	C	G	0|1	23,3	0.19	26
2	bad responder	intergenic	ENSCAFG00000046531.1(dist=222789),ENSCAFG00000008079.4(dist=46331)	ENSCAFG00000046531	-	-	chr17	43426592	43426592	G	C	0/1	21,3	0.2	24
2	bad responder	intronic	ENSCAFG00000008079.4	ENSCAFG00000008079	CTNNA2	CTNNA2	chr17	43860043	43860043	T	G	0/1	21,4	0.25	25
2	bad responder	intergenic	ENSCAFG00000040957.2(dist=677142),ENSCAFG00000008149.4(dist=501639)	ENSCAFG00000040957	-	-	chr17	45589339	45589339	-	TG	0/1	25,7	0.278	32
2	bad responder	intronic	ENSCAFG00000008149.4	ENSCAFG00000008149	LRRTM4	LRRTM4	chr17	46652381	46652381	G	A	0/1	18,4	0.222	22
2	bad responder	ncRNA_intronic	ENSCAFG00000048738.1	ENSCAFG00000048738	-	-	chr17	47011573	47011573	G	A	0/1	19,4	0.21	23
2	bad responder	intergenic	ENSCAFG00000008728.4(dist=13645),ENSCAFG00000008747.4(dist=8226)	ENSCAFG00000008728	-	-	chr17	49096320	49096320	T	A	0/1	31,3	0.124	34
2	bad responder	intronic	ENSCAFG00000008879.4	ENSCAFG00000008879	-	CCT7	chr17	49624646	49624646	A	G	0/1	25,4	0.143	29
2	bad responder	intronic	ENSCAFG00000008944.4	ENSCAFG00000008944	SFXN5	SFXN5	chr17	49825931	49825931	C	A	0|1	26,3	0.143	29
2	bad responder	intronic	ENSCAFG00000008944.4	ENSCAFG00000008944	SFXN5	SFXN5	chr17	49825936	49825936	T	G	0|1	27,3	0.143	30
2	bad responder	intronic	ENSCAFG00000009033.5	ENSCAFG00000009033	DYSF	DYSF	chr17	51221390	51221390	-	T	0/1	39,4	0.124	43
2	bad responder	ncRNA_intronic	ENSCAFG00000049253.1	ENSCAFG00000049253	-	-	chr17	51476908	51476908	A	C	0|1	16,2	0.152	18
2	bad responder	ncRNA_intronic	ENSCAFG00000049253.1	ENSCAFG00000049253	-	-	chr17	51476913	51476913	G	T	0|1	16,2	0.154	18
2	bad responder	intronic	ENSCAFG00000009255.4	ENSCAFG00000009255	PTPN22	PTPN22	chr17	51682063	51682063	C	G	0/1	30,3	0.115	33
2	bad responder	intergenic	ENSCAFG00000048889.1(dist=10515),ENSCAFG00000009348.5(dist=7842)	ENSCAFG00000048889	-	-	chr17	51856932	51856932	C	G	0/1	18,3	0.186	21
2	bad responder	intronic	ENSCAFG00000009470.4	ENSCAFG00000009470	BCAS2	BCAS2	chr17	52284812	52284812	A	T	0/1	22,4	0.19	26
2	bad responder	intergenic	ENSCAFG00000009494.5(dist=8399),ENSCAFG00000009503.1(dist=24050)	ENSCAFG00000009494	-	-	chr17	52339414	52339414	G	A	0/1	11,19	0.565	30
2	bad responder	intergenic	ENSCAFG00000009503.1(dist=6932),ENSCAFG00000009521.4(dist=6659)	ENSCAFG00000009503	-	-	chr17	52370743	52370743	T	C	0/1	24,3	0.158	27
2	bad responder	exonic	ENSCAFG00000009671.4	ENSCAFG00000009671	-	-	chr17	52526632	52526632	A	G	0/1	12,4	0.25	16
2	bad responder	intronic	ENSCAFG00000009873.4	ENSCAFG00000009873	MAN1A2	MAN1A2	chr17	54822972	54822972	C	T	0/1	17,4	0.188	21
2	bad responder	intronic	ENSCAFG00000009951.4	ENSCAFG00000009951	SPAG17	SPAG17	chr17	55303231	55303231	A	-	0|1	25,4	0.15	29
2	bad responder	intronic	ENSCAFG00000009951.4	ENSCAFG00000009951	SPAG17	SPAG17	chr17	55456154	55456154	T	A	0/1	21,3	0.199	24
2	bad responder	intergenic	ENSCAFG00000043803.1(dist=371876),ENSCAFG00000044050.1(dist=123833)	ENSCAFG00000043803	-	-	chr17	55862116	55862116	A	T	0|1	22,4	0.199	26
2	bad responder	exonic	ENSCAFG00000010476.5	ENSCAFG00000010476	NOTCH2	NOTCH2	chr17	56871763	56871763	T	C	0/1	14,4	0.188	18
2	bad responder	intergenic	ENSCAFG00000010803.5(dist=9656),ENSCAFG00000025837.1(dist=10031)	ENSCAFG00000010803	-	-	chr17	57368634	57368634	G	T	0/1	26,4	0.136	30
2	bad responder	intergenic	ENSCAFG00000010803.5(dist=9682),ENSCAFG00000025837.1(dist=10005)	ENSCAFG00000010803	-	-	chr17	57368660	57368660	G	A	0/1	23,4	0.142	27
2	bad responder	intergenic	ENSCAFG00000041814.1(dist=83013),ENSCAFG00000041476.1(dist=67833)	ENSCAFG00000041814	-	-	chr17	57901378	57901378	C	G	0|1	22,5	0.263	27
2	bad responder	intergenic	ENSCAFG00000041736.1(dist=14394),ENSCAFG00000049795.1(dist=1169)	ENSCAFG00000041736	-	-	chr17	59173830	59173830	T	C	0/1	31,5	0.2	36
2	bad responder	upstream;downstream	ENSCAFG00000049699.1;ENSCAFG00000047699.1	ENSCAFG00000049699	-	-	chr17	61612157	61612157	C	A	0/1	86,17	0.197	103
2	bad responder	intergenic	ENSCAFG00000013656.1(dist=171883),ENSCAFG00000029051.2(dist=46357)	ENSCAFG00000013656	-	-	chr17	63306381	63306381	G	A	0/1	19,7	0.263	26
2	bad responder	intergenic	ENSCAFG00000036392.2(dist=6890),ENSCAFG00000048586.1(dist=8839)	ENSCAFG00000036392	-	-	chr17	63426986	63426986	G	A	0|1	28,5	0.207	33
2	bad responder	intergenic	ENSCAFG00000036392.2(dist=6891),ENSCAFG00000048586.1(dist=8838)	ENSCAFG00000036392	-	-	chr17	63426987	63426987	T	C	0|1	28,5	0.207	33
2	bad responder	intergenic	ENSCAFG00000032137.2(dist=62854),ENSCAFG00000046692.1(dist=61889)	ENSCAFG00000032137	-	-	chr17	64173759	64173759	G	C	0|1	23,2	0.158	25
2	bad responder	intergenic	ENSCAFG00000032137.2(dist=62855),ENSCAFG00000046692.1(dist=61888)	ENSCAFG00000032137	-	-	chr17	64173760	64173760	G	C	0|1	23,2	0.158	25
2	bad responder	intergenic	ENSCAFG00000046692.1(dist=14066),NONE(dist=NONE)	ENSCAFG00000046692	-	-	chr17	64253773	64253773	T	A	0/1	18,5	0.294	23
2	bad responder	intergenic	ENSCAFG00000046692.1(dist=21885),NONE(dist=NONE)	ENSCAFG00000046692	-	-	chr17	64261592	64261592	A	C	0/1	24,4	0.15	28
2	bad responder	intronic	ENSCAFG00000003334.5	ENSCAFG00000003334	ABCA13	-	chr18	232179	232179	G	C	0/1	27,2	0.143	29
2	bad responder	intergenic	ENSCAFG00000043420.1(dist=104454),ENSCAFG00000043282.1(dist=239796)	ENSCAFG00000043420	-	-	chr18	512015	512015	C	G	0|1	20,2	0.167	22
2	bad responder	intergenic	ENSCAFG00000043420.1(dist=104457),ENSCAFG00000043282.1(dist=239793)	ENSCAFG00000043420	-	-	chr18	512018	512018	C	G	0|1	20,3	0.166	23
2	bad responder	intergenic	ENSCAFG00000042156.1(dist=18959),ENSCAFG00000003354.5(dist=219958)	ENSCAFG00000042156	-	-	chr18	1037399	1037399	C	T	0/1	20,14	0.461	34
2	bad responder	intergenic	ENSCAFG00000003358.3(dist=3525),ENSCAFG00000037073.2(dist=2630)	ENSCAFG00000003358	-	-	chr18	1468479	1468479	A	T	0|1	24,4	0.173	28
2	bad responder	intergenic	ENSCAFG00000030774.2(dist=72439),ENSCAFG00000043372.1(dist=505920)	ENSCAFG00000030774	-	-	chr18	3058469	3058469	A	G	0/1	19,4	0.158	23
2	bad responder	intergenic	ENSCAFG00000030774.2(dist=213593),ENSCAFG00000043372.1(dist=364766)	ENSCAFG00000030774	-	-	chr18	3199623	3199623	T	C	0/1	18,3	0.2	21
2	bad responder	intergenic	ENSCAFG00000030774.2(dist=368726),ENSCAFG00000043372.1(dist=209633)	ENSCAFG00000030774	-	-	chr18	3354756	3354756	C	T	0/1	26,2	0.13	28
2	bad responder	intergenic	ENSCAFG00000030066.1(dist=136062),ENSCAFG00000041314.1(dist=79929)	ENSCAFG00000030066	-	-	chr18	4066615	4066615	A	G	0/1	17,6	0.234	23
2	bad responder	intergenic	ENSCAFG00000003455.4(dist=11917),ENSCAFG00000039817.2(dist=263630)	ENSCAFG00000003455	-	-	chr18	4884361	4884361	C	T	0/1	17,7	0.368	24
2	bad responder	intergenic	ENSCAFG00000003465.4(dist=25519),ENSCAFG00000003470.4(dist=129839)	ENSCAFG00000003465	-	-	chr18	6068150	6068150	G	A	0/1	8,13	0.533	21
2	bad responder	intronic	ENSCAFG00000003494.5	ENSCAFG00000003494	HECW1	HECW1	chr18	7055352	7055352	A	T	0/1	11,3	0.25	14
2	bad responder	intergenic	ENSCAFG00000036215.2(dist=92323),ENSCAFG00000003535.5(dist=4390)	ENSCAFG00000036215	-	-	chr18	7797004	7797004	G	A	0/1	27,14	0.345	41
2	bad responder	intronic	ENSCAFG00000003535.5	ENSCAFG00000003535	GLI3	GLI3	chr18	7808834	7808834	G	T	0|1	19,4	0.184	23
2	bad responder	intronic	ENSCAFG00000003535.5	ENSCAFG00000003535	GLI3	GLI3	chr18	7808839	7808839	A	C	0|1	19,4	0.188	23
2	bad responder	intronic	ENSCAFG00000003535.5	ENSCAFG00000003535	GLI3	GLI3	chr18	7835928	7835928	A	T	0|1	18,3	0.19	21
2	bad responder	intronic	ENSCAFG00000003535.5	ENSCAFG00000003535	GLI3	GLI3	chr18	7835933	7835933	A	T	0|1	18,3	0.19	21
2	bad responder	intergenic	ENSCAFG00000036848.2(dist=35264),ENSCAFG00000046167.1(dist=150988)	ENSCAFG00000036848	-	-	chr18	8486643	8486643	C	A	0/1	27,3	0.13	30
2	bad responder	intergenic	ENSCAFG00000036848.2(dist=35526),ENSCAFG00000046167.1(dist=150726)	ENSCAFG00000036848	-	-	chr18	8486905	8486905	C	T	0/1	23,11	0.333	34
2	bad responder	intronic	ENSCAFG00000003556.4	ENSCAFG00000003556	SUGCT	SUGCT	chr18	9060286	9060286	A	T	0|1	18,3	0.21	21
2	bad responder	intronic	ENSCAFG00000003556.4	ENSCAFG00000003556	SUGCT	SUGCT	chr18	9060289	9060289	A	T	0|1	19,3	0.2	22
2	bad responder	intronic	ENSCAFG00000003556.4	ENSCAFG00000003556	SUGCT	SUGCT	chr18	9207169	9207169	C	G	0/1	18,4	0.235	22
2	bad responder	intronic	ENSCAFG00000003556.4	ENSCAFG00000003556	SUGCT	SUGCT	chr18	9698675	9698675	G	A	0|1	11,3	0.231	14
2	bad responder	intronic	ENSCAFG00000003556.4	ENSCAFG00000003556	SUGCT	SUGCT	chr18	9698676	9698676	T	C	0|1	11,3	0.231	14
2	bad responder	intronic	ENSCAFG00000003571.4	ENSCAFG00000003571	POU6F2	POU6F2	chr18	10346320	10346320	T	A	0/1	31,3	0.125	34
2	bad responder	intergenic	ENSCAFG00000040998.1(dist=44238),ENSCAFG00000047294.1(dist=2714)	ENSCAFG00000040998	-	-	chr18	11012747	11012747	C	T	0/1	17,3	0.186	20
2	bad responder	intronic	ENSCAFG00000003786.4	ENSCAFG00000003786	LAMB4	LAMB4	chr18	12514173	12514173	A	C	0|1	24,5	0.19	29
2	bad responder	intergenic	ENSCAFG00000003952.4(dist=8825),ENSCAFG00000045486.1(dist=7071)	ENSCAFG00000003952	-	-	chr18	13476863	13476863	T	A	0|1	29,2	0.13	31
2	bad responder	intergenic	ENSCAFG00000003952.4(dist=8826),ENSCAFG00000045486.1(dist=7070)	ENSCAFG00000003952	-	-	chr18	13476864	13476864	T	A	0|1	29,2	0.13	31
2	bad responder	intergenic	ENSCAFG00000003977.4(dist=37888),ENSCAFG00000046626.1(dist=279377)	ENSCAFG00000003977	-	-	chr18	13649029	13649029	A	G	0/1	17,4	0.185	21
2	bad responder	intronic	ENSCAFG00000004007.3	ENSCAFG00000004007	CDHR3	CDHR3	chr18	14472849	14472849	C	G	0/1	17,15	0.48	32
2	bad responder	intergenic	ENSCAFG00000004007.3(dist=118599),ENSCAFG00000004012.5(dist=45252)	ENSCAFG00000004007	-	-	chr18	14616245	14616245	A	G	0/1	21,4	0.158	25
2	bad responder	intronic	ENSCAFG00000004244.4	ENSCAFG00000004244	NAPEPLD	NAPEPLD	chr18	16984810	16984810	G	C	0|1	10,5	0.384	15
2	bad responder	intronic	ENSCAFG00000004366.5	ENSCAFG00000004366	MAGI2	MAGI2	chr18	18575922	18575922	A	-	0/1	74,12	0.14	86
2	bad responder	ncRNA_intronic	ENSCAFG00000046224.1	ENSCAFG00000046224	-	-	chr18	21493483	21493483	C	T	0/1	9,6	0.417	15
2	bad responder	intergenic	ENSCAFG00000046224.1(dist=32533),ENSCAFG00000006339.4(dist=25733)	ENSCAFG00000046224	-	-	chr18	21538943	21538943	T	C	0|1	24,3	0.149	27
2	bad responder	intronic	ENSCAFG00000006339.4	ENSCAFG00000006339	CACNA2D1	CACNA2D1	chr18	21832733	21832733	G	A	0|1	22,2	0.118	24
2	bad responder	intronic	ENSCAFG00000006264.4	ENSCAFG00000006264	PCLO	PCLO	chr18	22401251	22401251	A	G	0/1	19,3	0.176	22
2	bad responder	intronic	ENSCAFG00000006247.4	ENSCAFG00000006247	SEMA3E	SEMA3E	chr18	22907639	22907639	T	C	0/1	14,9	0.429	23
2	bad responder	intronic	ENSCAFG00000006247.4	ENSCAFG00000006247	SEMA3E	SEMA3E	chr18	22907685	22907685	T	G	0/1	14,4	0.277	18
2	bad responder	intronic	ENSCAFG00000006247.4	ENSCAFG00000006247	SEMA3E	SEMA3E	chr18	23109365	23109365	T	C	0/1	18,4	0.188	22
2	bad responder	intergenic	ENSCAFG00000006212.4(dist=36156),ENSCAFG00000028061.1(dist=17251)	ENSCAFG00000006212	-	-	chr18	23903254	23903254	C	T	0/1	11,16	0.5	27
2	bad responder	intronic	ENSCAFG00000006128.4	ENSCAFG00000006128	SEMA3D	SEMA3D	chr18	24362310	24362310	G	A	0/1	17,10	0.341	27
2	bad responder	intergenic	ENSCAFG00000041566.1(dist=60863),ENSCAFG00000043528.1(dist=60692)	ENSCAFG00000041566	-	-	chr18	24673912	24673912	T	A	0|1	20,4	0.25	24
2	bad responder	intergenic	ENSCAFG00000041566.1(dist=60866),ENSCAFG00000043528.1(dist=60689)	ENSCAFG00000041566	-	-	chr18	24673915	24673915	T	A	0|1	20,4	0.25	24
2	bad responder	intergenic	ENSCAFG00000040196.2(dist=32194),ENSCAFG00000047020.1(dist=33745)	ENSCAFG00000040196	-	-	chr18	26807753	26807753	T	C	0/1	17,4	0.2	21
2	bad responder	intergenic	ENSCAFG00000037167.2(dist=44544),ENSCAFG00000046332.1(dist=924667)	ENSCAFG00000037167	-	-	chr18	27732146	27732146	C	G	0|1	19,3	0.211	22
2	bad responder	intergenic	ENSCAFG00000037167.2(dist=78689),ENSCAFG00000046332.1(dist=890522)	ENSCAFG00000037167	-	-	chr18	27766291	27766291	G	C	0|1	24,2	0.105	26
2	bad responder	intergenic	ENSCAFG00000037167.2(dist=291265),ENSCAFG00000046332.1(dist=677946)	ENSCAFG00000037167	-	-	chr18	27978867	27978867	C	G	0/1	26,7	0.239	33
2	bad responder	intergenic	ENSCAFG00000037167.2(dist=295753),ENSCAFG00000046332.1(dist=673458)	ENSCAFG00000037167	-	-	chr18	27983355	27983355	C	T	0/1	22,3	0.167	25
2	bad responder	ncRNA_intronic	ENSCAFG00000046332.1	ENSCAFG00000046332	-	-	chr18	28709072	28709072	G	A	0/1	12,12	0.476	24
2	bad responder	ncRNA_intronic	ENSCAFG00000046332.1	ENSCAFG00000046332	-	-	chr18	28763609	28763609	A	T	0/1	23,3	0.19	26
2	bad responder	ncRNA_intronic	ENSCAFG00000046332.1	ENSCAFG00000046332	-	-	chr18	28796559	28796559	C	T	0/1	8,9	0.5	17
2	bad responder	intergenic	ENSCAFG00000006768.2(dist=56757),ENSCAFG00000044495.1(dist=68864)	ENSCAFG00000006768	-	-	chr18	28899840	28899840	T	C	0|1	31,5	0.179	36
2	bad responder	intergenic	ENSCAFG00000006768.2(dist=56760),ENSCAFG00000044495.1(dist=68861)	ENSCAFG00000006768	-	-	chr18	28899843	28899843	G	A	0|1	31,5	0.179	36
2	bad responder	intergenic	ENSCAFG00000006768.2(dist=101879),ENSCAFG00000044495.1(dist=23742)	ENSCAFG00000006768	-	-	chr18	28944962	28944962	T	A	0/1	11,9	0.5	20
2	bad responder	intergenic	ENSCAFG00000040929.2(dist=352667),ENSCAFG00000049839.1(dist=214482)	ENSCAFG00000040929	-	-	chr18	30227144	30227144	T	C	0|1	24,2	0.13	26
2	bad responder	intergenic	ENSCAFG00000040929.2(dist=352672),ENSCAFG00000049839.1(dist=214477)	ENSCAFG00000040929	-	-	chr18	30227149	30227149	G	A	0|1	26,3	0.125	29
2	bad responder	intronic	ENSCAFG00000006825.4	ENSCAFG00000006825	PRR5L	PRR5L	chr18	31811959	31811959	T	C	0/1	25,4	0.124	29
2	bad responder	intronic	ENSCAFG00000006865.4	ENSCAFG00000006865	PAMR1	PAMR1	chr18	32452203	32452203	T	C	0|1	10,2	0.222	12
2	bad responder	intronic	ENSCAFG00000006865.4	ENSCAFG00000006865	PAMR1	PAMR1	chr18	32452206	32452206	G	A	0|1	10,2	0.222	12
2	bad responder	intronic	ENSCAFG00000006889.5	ENSCAFG00000006889	CD44	CD44	chr18	32776055	32776055	G	C	0/1	20,18	0.464	38
2	bad responder	intronic	ENSCAFG00000006977.4	ENSCAFG00000006977	ABTB2	ABTB2	chr18	33637372	33637372	C	T	0/1	27,14	0.322	41
2	bad responder	intergenic	ENSCAFG00000044971.1(dist=24246),ENSCAFG00000043269.1(dist=9475)	ENSCAFG00000044971	-	-	chr18	33822653	33822653	A	C	0|1	24,2	0.095	26
2	bad responder	intergenic	ENSCAFG00000044971.1(dist=24251),ENSCAFG00000043269.1(dist=9470)	ENSCAFG00000044971	-	-	chr18	33822658	33822658	G	T	0|1	24,2	0.095	26
2	bad responder	intronic	ENSCAFG00000007196.5	ENSCAFG00000007196	KIAA1549L	KIAA1549L	chr18	34057200	34057200	C	T	0|1	25,2	0.149	27
2	bad responder	downstream	ENSCAFG00000007264.4	ENSCAFG00000007264	CSTF3	CSTF3	chr18	34568524	34568524	T	C	0/1	15,3	0.187	18
2	bad responder	ncRNA_intronic	ENSCAFG00000037705.2	ENSCAFG00000037705	-	-	chr18	35541636	35541636	T	C	0/1	19,3	0.187	22
2	bad responder	intronic	ENSCAFG00000007521.5	ENSCAFG00000007521	-	-	chr18	36176272	36176272	C	T	0/1	19,3	0.167	22
2	bad responder	intergenic	ENSCAFG00000007521.5(dist=35233),ENSCAFG00000033278.2(dist=3667)	ENSCAFG00000007521	-	-	chr18	36516007	36516007	C	T	0/1	12,14	0.545	26
2	bad responder	intergenic	ENSCAFG00000033278.2(dist=67525),ENSCAFG00000045139.1(dist=36517)	ENSCAFG00000033278	-	-	chr18	36679374	36679374	T	A	0|1	23,3	0.15	26
2	bad responder	intergenic	ENSCAFG00000047091.1(dist=2734),ENSCAFG00000007646.4(dist=13029)	ENSCAFG00000047091	-	-	chr18	37500519	37500519	G	C	0/1	25,4	0.136	29
2	bad responder	intronic	ENSCAFG00000007651.4	ENSCAFG00000007651	DTX4	DTX4	chr18	37549639	37549639	C	G	0/1	14,3	0.214	17
2	bad responder	intronic	ENSCAFG00000007651.4	ENSCAFG00000007651	DTX4	DTX4	chr18	37558254	37558254	A	T	0/1	24,3	0.19	27
2	bad responder	downstream	ENSCAFG00000007729.3	ENSCAFG00000007729	OR9I1	OR9I1	chr18	38241988	38241988	T	A	0/1	19,3	0.166	22
2	bad responder	intergenic	ENSCAFG00000029823.2(dist=6955),ENSCAFG00000008001.3(dist=6655)	ENSCAFG00000029823	-	-	chr18	39234400	39234400	C	A	0|1	24,3	0.136	27
2	bad responder	intergenic	ENSCAFG00000029823.2(dist=6956),ENSCAFG00000008001.3(dist=6654)	ENSCAFG00000029823	-	-	chr18	39234401	39234401	T	G	0|1	24,3	0.136	27
2	bad responder	intergenic	ENSCAFG00000046319.1(dist=1659),ENSCAFG00000047543.1(dist=4864)	ENSCAFG00000046319	-	-	chr18	39736016	39736016	T	-	0|1	15,3	0.2	18
2	bad responder	intergenic	ENSCAFG00000049789.1(dist=3447),ENSCAFG00000031080.1(dist=5969)	ENSCAFG00000049789	-	-	chr18	40090549	40090549	C	T	0/1	20,6	0.272	26
2	bad responder	intergenic	ENSCAFG00000041372.1(dist=125593),ENSCAFG00000015171.3(dist=29880)	ENSCAFG00000041372	-	-	chr18	40659263	40659264	CC	-	0|1	33,3	0.103	36
2	bad responder	intergenic	ENSCAFG00000032426.2(dist=9426),ENSCAFG00000008452.4(dist=8475)	ENSCAFG00000032426	-	-	chr18	42096849	42096849	A	C	0|1	20,4	0.227	24
2	bad responder	intergenic	ENSCAFG00000032426.2(dist=9431),ENSCAFG00000008452.4(dist=8470)	ENSCAFG00000032426	-	-	chr18	42096854	42096854	G	T	0|1	19,4	0.238	23
2	bad responder	intronic	ENSCAFG00000008977.5	ENSCAFG00000008977	LRP4	LRP4	chr18	42618394	42618394	G	A	0/1	19,3	0.176	22
2	bad responder	intergenic	ENSCAFG00000009186.4(dist=6712),ENSCAFG00000009193.5(dist=28841)	ENSCAFG00000009186	-	-	chr18	42903672	42903672	T	C	0/1	18,12	0.435	30
2	bad responder	intronic	ENSCAFG00000009400.5	ENSCAFG00000009400	TP53I11	TP53I11	chr18	44386349	44386349	T	-	0|1	25,7	0.261	32
2	bad responder	intronic	ENSCAFG00000009400.5	ENSCAFG00000009400	TP53I11	TP53I11	chr18	44386353	44386353	-	A	0|1	25,7	0.261	32
2	bad responder	intronic	ENSCAFG00000009400.5,ENSCAFG00000009416.3	ENSCAFG00000009400	TP53I11	TP53I11	chr18	44432327	44432327	C	A	0|1	20,3	0.2	23
2	bad responder	intronic	ENSCAFG00000009477.4	ENSCAFG00000009477	EXT2	EXT2	chr18	45117246	45117246	T	A	0/1	21,4	0.19	25
2	bad responder	intergenic	ENSCAFG00000042114.1(dist=10605),ENSCAFG00000010103.4(dist=25826)	ENSCAFG00000042114	-	-	chr18	46369565	46369565	G	A	0/1	24,3	0.158	27
2	bad responder	intronic	ENSCAFG00000010231.5	ENSCAFG00000010231	KCNQ1	KCNQ1	chr18	46807061	46807061	G	A	0/1	32,5	0.206	37
2	bad responder	intronic	ENSCAFG00000046229.1	ENSCAFG00000046229	-	-	chr18	47014914	47014914	T	G	0|1	22,4	0.211	26
2	bad responder	intronic	ENSCAFG00000046229.1	ENSCAFG00000046229	-	-	chr18	47014917	47014917	C	A	0|1	22,4	0.211	26
2	bad responder	intronic	ENSCAFG00000010442.5	ENSCAFG00000010442	-	-	chr18	47292502	47292502	C	T	0/1	24,4	0.158	28
2	bad responder	intergenic	ENSCAFG00000049735.1(dist=6837),ENSCAFG00000041443.1(dist=7893)	ENSCAFG00000049735	-	-	chr18	48274276	48274276	A	-	0/1	9,19	0.689	28
2	bad responder	intergenic	ENSCAFG00000041443.1(dist=51170),ENSCAFG00000010688.3(dist=47819)	ENSCAFG00000041443	-	-	chr18	48335403	48335403	A	G	0|1	28,5	0.2	33
2	bad responder	intergenic	ENSCAFG00000029983.2(dist=9053),ENSCAFG00000010693.3(dist=38898)	ENSCAFG00000029983	-	-	chr18	48426030	48426030	C	T	0/1	13,14	0.524	27
2	bad responder	intergenic	ENSCAFG00000010700.4(dist=89672),ENSCAFG00000048296.1(dist=39799)	ENSCAFG00000010700	-	-	chr18	48605677	48605677	C	G	0|1	24,3	0.174	27
2	bad responder	intergenic	ENSCAFG00000010700.4(dist=89675),ENSCAFG00000048296.1(dist=39796)	ENSCAFG00000010700	-	-	chr18	48605680	48605680	C	G	0|1	24,3	0.174	27
2	bad responder	intergenic	ENSCAFG00000031492.2(dist=2357),ENSCAFG00000010757.3(dist=30283)	ENSCAFG00000031492	-	-	chr18	49106408	49106408	C	T	0/1	35,5	0.129	40
2	bad responder	intergenic	ENSCAFG00000010871.4(dist=60775),ENSCAFG00000010913.4(dist=7392)	ENSCAFG00000010871	-	-	chr18	49577171	49577171	T	G	0|1	12,3	0.231	15
2	bad responder	intergenic	ENSCAFG00000010871.4(dist=60778),ENSCAFG00000010913.4(dist=7389)	ENSCAFG00000010871	-	-	chr18	49577174	49577174	C	A	0|1	12,3	0.231	15
2	bad responder	intergenic	ENSCAFG00000011814.4(dist=2373),ENSCAFG00000011840.4(dist=3566)	ENSCAFG00000011814	-	-	chr18	50332476	50332476	A	T	0/1	36,3	0.142	39
2	bad responder	intronic	ENSCAFG00000012965.6	ENSCAFG00000012965	PACS1	PACS1	chr18	51134253	51134253	A	T	0/1	18,4	0.21	22
2	bad responder	intronic	ENSCAFG00000013299.6	ENSCAFG00000013299	KAT5	KAT5	chr18	51522363	51522363	A	G	0/1	21,4	0.167	25
2	bad responder	intronic	ENSCAFG00000013299.6	ENSCAFG00000013299	KAT5	KAT5	chr18	51542513	51542513	T	G	0|1	6,2	0.3	8
2	bad responder	intronic	ENSCAFG00000014019.5	ENSCAFG00000014019	MAJIN	MAJIN	chr18	52238740	52238740	T	A	0|1	27,3	0.12	30
2	bad responder	intronic	ENSCAFG00000014161.5	ENSCAFG00000014161	CDC42BPG	CDC42BPG	chr18	52333786	52333786	T	C	0/1	33,4	0.133	37
2	bad responder	ncRNA_intronic	ENSCAFG00000046785.1	ENSCAFG00000046785	-	-	chr18	52585920	52585920	A	T	0|1	27,4	0.125	31
2	bad responder	intronic	ENSCAFG00000015082.5	ENSCAFG00000015082	PLAAT3	PLAAT3	chr18	53393006	53393006	A	G	0/1	24,3	0.149	27
2	bad responder	intergenic	ENSCAFG00000015096.5(dist=12230),ENSCAFG00000015226.5(dist=29081)	ENSCAFG00000015096	-	-	chr18	53475544	53475544	A	G	0/1	18,4	0.267	22
2	bad responder	intronic	ENSCAFG00000016019.4	ENSCAFG00000016019	FADS2	FADS2	chr18	54614938	54614938	C	T	0|1	29,3	0.153	32
2	bad responder	intronic	ENSCAFG00000016019.4	ENSCAFG00000016019	FADS2	FADS2	chr18	54614939	54614939	A	G	0|1	29,3	0.154	32
2	bad responder	intronic	ENSCAFG00000030303.2	ENSCAFG00000030303	SDHAF2	AP003108.2	chr18	54984053	54984053	A	G	0/1	5,3	0.444	8
2	bad responder	intergenic	ENSCAFG00000028723.2(dist=13378),NONE(dist=NONE)	ENSCAFG00000028723	-	-	chr18	55828113	55828113	C	T	0/1	19,4	0.222	23
2	bad responder	intergenic	ENSCAFG00000028723.2(dist=16464),NONE(dist=NONE)	ENSCAFG00000028723	-	-	chr18	55831199	55831199	C	A	0|1	22,7	0.25	29
2	bad responder	intergenic	ENSCAFG00000048360.1(dist=175617),ENSCAFG00000042079.1(dist=99530)	ENSCAFG00000048360	-	-	chr19	489363	489363	A	G	0/1	13,17	0.524	30
2	bad responder	intergenic	ENSCAFG00000048360.1(dist=228377),ENSCAFG00000042079.1(dist=46770)	ENSCAFG00000048360	-	-	chr19	542123	542123	G	C	0/1	28,5	0.208	33
2	bad responder	intergenic	ENSCAFG00000003700.4(dist=76621),ENSCAFG00000003703.4(dist=49516)	ENSCAFG00000003700	-	-	chr19	3137390	3137390	G	A	0|1	25,4	0.182	29
2	bad responder	intergenic	ENSCAFG00000003700.4(dist=76622),ENSCAFG00000003703.4(dist=49515)	ENSCAFG00000003700	-	-	chr19	3137391	3137391	T	C	0|1	25,4	0.182	29
2	bad responder	intergenic	ENSCAFG00000043287.1(dist=69405),ENSCAFG00000040608.2(dist=67328)	ENSCAFG00000043287	-	-	chr19	4504293	4504293	T	A	0/1	23,3	0.144	26
2	bad responder	intergenic	ENSCAFG00000038491.2(dist=802435),ENSCAFG00000041840.1(dist=289653)	ENSCAFG00000038491	-	-	chr19	6867768	6867768	A	C	0/1	10,6	0.461	16
2	bad responder	intergenic	ENSCAFG00000049101.1(dist=267003),ENSCAFG00000043663.1(dist=76046)	ENSCAFG00000049101	-	-	chr19	9118177	9118177	C	T	0/1	21,4	0.158	25
2	bad responder	intergenic	ENSCAFG00000028273.1(dist=30173),ENSCAFG00000003797.4(dist=221506)	ENSCAFG00000028273	-	-	chr19	9683064	9683064	A	G	0/1	11,17	0.6	28
2	bad responder	intergenic	ENSCAFG00000003797.4(dist=593020),ENSCAFG00000039256.2(dist=206601)	ENSCAFG00000003797	-	-	chr19	10500044	10500044	T	G	0/1	9,13	0.6	22
2	bad responder	ncRNA_intronic	ENSCAFG00000038465.2	ENSCAFG00000038465	-	-	chr19	11244869	11244869	G	C	0/1	20,4	0.222	24
2	bad responder	intergenic	ENSCAFG00000043635.1(dist=36114),ENSCAFG00000048551.1(dist=5390)	ENSCAFG00000043635	-	-	chr19	11339999	11339999	A	T	0|1	18,3	0.187	21
2	bad responder	intergenic	ENSCAFG00000043635.1(dist=36117),ENSCAFG00000048551.1(dist=5387)	ENSCAFG00000043635	-	-	chr19	11340002	11340002	A	T	0|1	18,3	0.187	21
2	bad responder	intergenic	ENSCAFG00000047613.1(dist=27268),ENSCAFG00000046515.1(dist=69714)	ENSCAFG00000047613	-	-	chr19	12306115	12306115	G	T	0|1	18,2	0.176	20
2	bad responder	intergenic	ENSCAFG00000047613.1(dist=27271),ENSCAFG00000046515.1(dist=69711)	ENSCAFG00000047613	-	-	chr19	12306118	12306118	A	C	0|1	18,2	0.176	20
2	bad responder	intergenic	ENSCAFG00000041989.1(dist=38824),ENSCAFG00000030590.2(dist=50063)	ENSCAFG00000041989	-	-	chr19	12576587	12576587	A	G	0/1	24,3	0.143	27
2	bad responder	intergenic	ENSCAFG00000041989.1(dist=51766),ENSCAFG00000030590.2(dist=37121)	ENSCAFG00000041989	-	-	chr19	12589529	12589529	A	T	0|1	25,6	0.269	31
2	bad responder	intergenic	ENSCAFG00000041989.1(dist=51767),ENSCAFG00000030590.2(dist=37120)	ENSCAFG00000041989	-	-	chr19	12589530	12589530	A	T	0|1	25,6	0.269	31
2	bad responder	intergenic	ENSCAFG00000049364.1(dist=22168),ENSCAFG00000041964.1(dist=54761)	ENSCAFG00000049364	-	-	chr19	14060837	14060837	C	A	0|1	22,4	0.181	26
2	bad responder	intergenic	ENSCAFG00000049364.1(dist=22173),ENSCAFG00000041964.1(dist=54756)	ENSCAFG00000049364	-	-	chr19	14060842	14060842	T	G	0|1	21,4	0.19	25
2	bad responder	intergenic	ENSCAFG00000003951.3(dist=110302),ENSCAFG00000046327.1(dist=173628)	ENSCAFG00000003951	-	-	chr19	14583807	14583807	G	C	0/1	7,8	0.5	15
2	bad responder	intronic	ENSCAFG00000003962.5	ENSCAFG00000003962	FAT4	FAT4	chr19	15286143	15286143	T	G	0/1	18,6	0.299	24
2	bad responder	intergenic	ENSCAFG00000045652.1(dist=107791),ENSCAFG00000044012.1(dist=83022)	ENSCAFG00000045652	-	-	chr19	15441792	15441792	G	A	0/1	18,3	0.176	21
2	bad responder	ncRNA_intronic	ENSCAFG00000042415.1	ENSCAFG00000042415	-	-	chr19	15654940	15654940	T	A	0/1	24,3	0.15	27
2	bad responder	intergenic	ENSCAFG00000048271.1(dist=233065),ENSCAFG00000046555.1(dist=179127)	ENSCAFG00000048271	-	-	chr19	16290399	16290399	T	C	0/1	22,3	0.176	25
2	bad responder	intronic	ENSCAFG00000004013.5	ENSCAFG00000004013	ADAD1	ADAD1	chr19	17823252	17823252	T	C	0/1	14,3	0.2	17
2	bad responder	intergenic	ENSCAFG00000004179.5(dist=80459),ENSCAFG00000048915.1(dist=104887)	ENSCAFG00000004179	-	-	chr19	19406049	19406049	C	T	0|1	23,3	0.157	26
2	bad responder	intergenic	ENSCAFG00000004179.5(dist=80464),ENSCAFG00000048915.1(dist=104882)	ENSCAFG00000004179	-	-	chr19	19406054	19406054	A	G	0|1	23,3	0.158	26
2	bad responder	intergenic	ENSCAFG00000048018.1(dist=1863),ENSCAFG00000043533.1(dist=177212)	ENSCAFG00000048018	-	-	chr19	20130172	20130172	A	G	0/1	15,10	0.375	25
2	bad responder	intergenic	ENSCAFG00000048018.1(dist=27233),ENSCAFG00000043533.1(dist=151842)	ENSCAFG00000048018	-	-	chr19	20155542	20155542	T	G	0/1	31,5	0.192	36
2	bad responder	intergenic	ENSCAFG00000048018.1(dist=63216),ENSCAFG00000043533.1(dist=115859)	ENSCAFG00000048018	-	-	chr19	20191525	20191525	G	A	0/1	29,5	0.199	34
2	bad responder	intronic	ENSCAFG00000004222.4	ENSCAFG00000004222	FAM168B	FAM168B	chr19	20752697	20752697	C	A	0|1	13,2	0.2	15
2	bad responder	intronic	ENSCAFG00000004222.4	ENSCAFG00000004222	FAM168B	FAM168B	chr19	20752702	20752702	T	G	0|1	13,2	0.2	15
2	bad responder	intronic	ENSCAFG00000004222.4	ENSCAFG00000004222	FAM168B	FAM168B	chr19	20775213	20775213	C	A	0|1	27,4	0.192	31
2	bad responder	intronic	ENSCAFG00000004222.4	ENSCAFG00000004222	FAM168B	FAM168B	chr19	20775218	20775218	T	G	0|1	28,4	0.192	32
2	bad responder	intergenic	ENSCAFG00000004224.4(dist=23279),ENSCAFG00000042113.1(dist=13500)	ENSCAFG00000004224	-	-	chr19	20937289	20937289	C	A	0/1	16,14	0.478	30
2	bad responder	ncRNA_intronic	ENSCAFG00000042113.1	ENSCAFG00000042113	-	-	chr19	20975997	20975997	T	G	0/1	18,4	0.167	22
2	bad responder	ncRNA_intronic	ENSCAFG00000042113.1	ENSCAFG00000042113	-	-	chr19	21027705	21027705	G	T	0|1	27,5	0.208	32
2	bad responder	ncRNA_intronic	ENSCAFG00000042113.1	ENSCAFG00000042113	-	-	chr19	21027706	21027706	A	C	0|1	27,5	0.208	32
2	bad responder	intergenic	ENSCAFG00000046394.1(dist=27027),ENSCAFG00000044474.1(dist=54690)	ENSCAFG00000046394	-	-	chr19	21205235	21205235	C	T	0/1	19,4	0.176	23
2	bad responder	intergenic	ENSCAFG00000036565.2(dist=99529),ENSCAFG00000042065.1(dist=201671)	ENSCAFG00000036565	-	-	chr19	21717329	21717329	C	G	0/1	5,16	0.648	21
2	bad responder	intronic	ENSCAFG00000004606.5	ENSCAFG00000004606	BIN1	CYP27C1	chr19	23479934	23479934	C	A	0/1	18,12	0.44	30
2	bad responder	intergenic	ENSCAFG00000004606.5(dist=29781),ENSCAFG00000049018.1(dist=75881)	ENSCAFG00000004606	-	-	chr19	23564084	23564084	T	A	0/1	27,3	0.124	30
2	bad responder	intergenic	ENSCAFG00000004606.5(dist=84897),ENSCAFG00000049018.1(dist=20765)	ENSCAFG00000004606	-	-	chr19	23619200	23619200	C	A	0|1	28,4	0.167	32
2	bad responder	intergenic	ENSCAFG00000004606.5(dist=84898),ENSCAFG00000049018.1(dist=20764)	ENSCAFG00000004606	-	-	chr19	23619201	23619201	T	G	0|1	28,4	0.167	32
2	bad responder	intergenic	ENSCAFG00000049018.1(dist=30145),ENSCAFG00000039104.2(dist=25919)	ENSCAFG00000049018	-	-	chr19	23671932	23671932	G	C	0/1	25,4	0.13	29
2	bad responder	intergenic	ENSCAFG00000039137.2(dist=8522),ENSCAFG00000041612.1(dist=44362)	ENSCAFG00000039137	-	-	chr19	23864212	23864212	C	T	0/1	34,6	0.173	40
2	bad responder	intergenic	ENSCAFG00000040898.2(dist=227031),ENSCAFG00000004689.4(dist=278050)	ENSCAFG00000040898	-	-	chr19	25276917	25276917	A	C	0|1	17,3	0.187	20
2	bad responder	intronic	ENSCAFG00000004689.4	ENSCAFG00000004689	CNTNAP5	CNTNAP5	chr19	26349027	26349027	G	A	1|0	27,9	0.307	36
2	bad responder	intronic	ENSCAFG00000004689.4	ENSCAFG00000004689	CNTNAP5	CNTNAP5	chr19	26377774	26377774	C	T	0/1	15,3	0.2	18
2	bad responder	intergenic	ENSCAFG00000004689.4(dist=332107),ENSCAFG00000046106.1(dist=810385)	ENSCAFG00000004689	-	-	chr19	26730003	26730003	G	A	0/1	18,3	0.176	21
2	bad responder	intergenic	ENSCAFG00000004689.4(dist=345554),ENSCAFG00000046106.1(dist=796938)	ENSCAFG00000004689	-	-	chr19	26743450	26743450	A	T	0/1	5,6	0.584	11
2	bad responder	intergenic	ENSCAFG00000004689.4(dist=1087912),ENSCAFG00000046106.1(dist=54580)	ENSCAFG00000004689	-	-	chr19	27485808	27485808	C	T	0/1	16,11	0.364	27
2	bad responder	intergenic	ENSCAFG00000047349.1(dist=230037),ENSCAFG00000047303.1(dist=79688)	ENSCAFG00000047349	-	-	chr19	28042861	28042861	G	A	0/1	18,7	0.332	25
2	bad responder	intergenic	ENSCAFG00000037290.2(dist=46645),ENSCAFG00000004700.4(dist=3803)	ENSCAFG00000037290	-	-	chr19	28465660	28465660	A	C	0|1	31,5	0.192	36
2	bad responder	intergenic	ENSCAFG00000037290.2(dist=46650),ENSCAFG00000004700.4(dist=3798)	ENSCAFG00000037290	-	-	chr19	28465665	28465665	G	T	0|1	32,4	0.192	36
2	bad responder	intergenic	ENSCAFG00000004759.5(dist=17530),ENSCAFG00000004788.4(dist=24278)	ENSCAFG00000004759	-	-	chr19	28845175	28845175	C	A	0|1	15,3	0.214	18
2	bad responder	intergenic	ENSCAFG00000004759.5(dist=17535),ENSCAFG00000004788.4(dist=24273)	ENSCAFG00000004759	-	-	chr19	28845180	28845180	T	G	0|1	14,3	0.231	17
2	bad responder	intergenic	ENSCAFG00000004759.5(dist=40006),ENSCAFG00000004788.4(dist=1802)	ENSCAFG00000004759	-	-	chr19	28867651	28867651	T	A	0|1	22,4	0.2	26
2	bad responder	intergenic	ENSCAFG00000004759.5(dist=40009),ENSCAFG00000004788.4(dist=1799)	ENSCAFG00000004759	-	-	chr19	28867654	28867654	T	A	0|1	22,4	0.199	26
2	bad responder	intergenic	ENSCAFG00000004788.4(dist=54354),ENSCAFG00000041297.1(dist=80841)	ENSCAFG00000004788	-	-	chr19	28976708	28976708	C	T	0/1	23,4	0.227	27
2	bad responder	intergenic	ENSCAFG00000004788.4(dist=54357),ENSCAFG00000041297.1(dist=80838)	ENSCAFG00000004788	-	-	chr19	28976711	28976711	A	G	0/1	24,3	0.182	27
2	bad responder	intronic	ENSCAFG00000004821.5	ENSCAFG00000004821	GLI2	GLI2	chr19	29181795	29181795	A	G	0/1	17,4	0.186	21
2	bad responder	intergenic	ENSCAFG00000041103.1(dist=47474),ENSCAFG00000044362.1(dist=44516)	ENSCAFG00000041103	-	-	chr19	29721811	29721811	C	T	0/1	25,3	0.131	28
2	bad responder	intronic	ENSCAFG00000004844.3	ENSCAFG00000004844	RALB	RALB	chr19	29793281	29793281	A	T	0/1	32,4	0.133	36
2	bad responder	intergenic	ENSCAFG00000004901.4(dist=49552),ENSCAFG00000004910.5(dist=18324)	ENSCAFG00000004901	-	-	chr19	30844890	30844890	C	A	0/1	20,3	0.167	23
2	bad responder	exonic	ENSCAFG00000004913.5	ENSCAFG00000004913	MARCO	MARCO	chr19	31021288	31021288	T	A	0/1	19,3	0.176	22
2	bad responder	intergenic	ENSCAFG00000049217.1(dist=178780),ENSCAFG00000046525.1(dist=23803)	ENSCAFG00000049217	-	-	chr19	31296107	31296107	G	A	0/1	35,4	0.111	39
2	bad responder	intergenic	ENSCAFG00000004919.2(dist=57995),ENSCAFG00000041015.1(dist=64519)	ENSCAFG00000004919	-	-	chr19	31432873	31432873	A	G	0|1	31,3	0.159	34
2	bad responder	intergenic	ENSCAFG00000004919.2(dist=63114),ENSCAFG00000041015.1(dist=59400)	ENSCAFG00000004919	-	-	chr19	31437992	31437992	A	C	0|1	24,5	0.217	29
2	bad responder	intergenic	ENSCAFG00000004919.2(dist=63115),ENSCAFG00000041015.1(dist=59399)	ENSCAFG00000004919	-	-	chr19	31437993	31437993	G	T	0|1	24,5	0.216	29
2	bad responder	intergenic	ENSCAFG00000004927.4(dist=12659),ENSCAFG00000004950.4(dist=32310)	ENSCAFG00000004927	-	-	chr19	31983202	31983202	T	C	0/1	20,3	0.15	23
2	bad responder	intergenic	ENSCAFG00000033041.2(dist=72657),ENSCAFG00000044304.1(dist=689012)	ENSCAFG00000033041	-	-	chr19	32435084	32435084	G	A	0/1	19,7	0.284	26
2	bad responder	intergenic	ENSCAFG00000033041.2(dist=515980),ENSCAFG00000044304.1(dist=245689)	ENSCAFG00000033041	-	-	chr19	32878407	32878407	C	G	0|1	14,5	0.341	19
2	bad responder	intergenic	ENSCAFG00000033041.2(dist=515983),ENSCAFG00000044304.1(dist=245686)	ENSCAFG00000033041	-	-	chr19	32878410	32878410	C	G	0|1	14,5	0.342	19
2	bad responder	intergenic	ENSCAFG00000033041.2(dist=614383),ENSCAFG00000044304.1(dist=147286)	ENSCAFG00000033041	-	-	chr19	32976810	32976810	T	A	0|1	14,2	0.141	16
2	bad responder	intronic	ENSCAFG00000004970.4	ENSCAFG00000004970	DPP10	DPP10	chr19	33517436	33517436	A	C	0|1	16,2	0.125	18
2	bad responder	intronic	ENSCAFG00000004970.4	ENSCAFG00000004970	DPP10	DPP10	chr19	34377925	34377925	T	-	0/1	9,16	0.62	25
2	bad responder	intronic	ENSCAFG00000004970.4	ENSCAFG00000004970	DPP10	DPP10	chr19	34512444	34512444	A	C	0|1	19,3	0.158	22
2	bad responder	intronic	ENSCAFG00000004970.4	ENSCAFG00000004970	DPP10	DPP10	chr19	34512449	34512449	G	T	0|1	18,3	0.167	21
2	bad responder	ncRNA_intronic	ENSCAFG00000034082.2	ENSCAFG00000034082	-	-	chr19	34998321	34998321	T	A	0/1	22,4	0.182	26
2	bad responder	intronic	ENSCAFG00000004998.4	ENSCAFG00000004998	GPR39	GPR39	chr19	35472194	35472194	-	C	0/1	11,15	0.592	26
2	bad responder	intronic	ENSCAFG00000005008.4	ENSCAFG00000005008	MGAT5	MGAT5	chr19	37245456	37245456	A	G	0/1	22,4	0.159	26
2	bad responder	intronic	ENSCAFG00000005042.5	ENSCAFG00000005042	RAB3GAP1	RAB3GAP1	chr19	37938095	37938095	A	G	0/1	10,4	0.271	14
2	bad responder	intergenic	ENSCAFG00000042371.1(dist=80053),ENSCAFG00000045616.1(dist=3883)	ENSCAFG00000042371	-	-	chr19	39395940	39395940	C	T	0/1	32,5	0.16	37
2	bad responder	intergenic	ENSCAFG00000047488.1(dist=335578),ENSCAFG00000005178.4(dist=2377)	ENSCAFG00000047488	-	-	chr19	40652784	40652784	-	AAC	0/1	10,8	0.467	18
2	bad responder	intergenic	ENSCAFG00000005178.4(dist=31523),ENSCAFG00000047192.1(dist=44612)	ENSCAFG00000005178	-	-	chr19	40733741	40733741	T	C	0/1	24,13	0.384	37
2	bad responder	intergenic	ENSCAFG00000047999.1(dist=139716),ENSCAFG00000046127.1(dist=42590)	ENSCAFG00000047999	-	-	chr19	41688392	41688392	G	C	0|1	22,3	0.19	25
2	bad responder	intergenic	ENSCAFG00000047999.1(dist=162052),ENSCAFG00000046127.1(dist=20254)	ENSCAFG00000047999	-	-	chr19	41710728	41710728	T	C	0/1	20,4	0.158	24
2	bad responder	intergenic	ENSCAFG00000046127.1(dist=160403),ENSCAFG00000039109.2(dist=166086)	ENSCAFG00000046127	-	-	chr19	41896538	41896538	G	C	0|1	23,3	0.143	26
2	bad responder	ncRNA_exonic	ENSCAFG00000039109.2	ENSCAFG00000039109	-	-	chr19	42063812	42063812	C	G	0/1	9,11	0.533	20
2	bad responder	ncRNA_exonic	ENSCAFG00000041387.1	ENSCAFG00000041387	-	-	chr19	42334404	42334404	A	G	0/1	12,9	0.412	21
2	bad responder	intronic	ENSCAFG00000005403.5	ENSCAFG00000005403	LRP1B	LRP1B	chr19	43564326	43564326	C	A	0|1	31,3	0.167	34
2	bad responder	intronic	ENSCAFG00000005403.5	ENSCAFG00000005403	LRP1B	LRP1B	chr19	43564329	43564329	T	G	0|1	31,3	0.167	34
2	bad responder	intergenic	ENSCAFG00000038066.2(dist=75667),ENSCAFG00000005466.4(dist=49997)	ENSCAFG00000038066	-	-	chr19	44972075	44972075	C	T	0|1	30,2	0.125	32
2	bad responder	intergenic	ENSCAFG00000038066.2(dist=75668),ENSCAFG00000005466.4(dist=49996)	ENSCAFG00000038066	-	-	chr19	44972076	44972076	A	G	0|1	30,2	0.125	32
2	bad responder	intronic	ENSCAFG00000025502.4	ENSCAFG00000025502	GTDC1	GTDC1	chr19	46141342	46141342	C	T	0/1	17,3	0.186	20
2	bad responder	intergenic	ENSCAFG00000043846.1(dist=23901),ENSCAFG00000033874.2(dist=55467)	ENSCAFG00000043846	-	-	chr19	47517630	47517630	T	A	0/1	15,2	0.25	17
2	bad responder	intergenic	ENSCAFG00000049523.1(dist=279049),ENSCAFG00000042309.1(dist=20616)	ENSCAFG00000049523	-	-	chr19	49329022	49329022	C	G	0|1	20,3	0.211	23
2	bad responder	intergenic	ENSCAFG00000049523.1(dist=279050),ENSCAFG00000042309.1(dist=20615)	ENSCAFG00000049523	-	-	chr19	49329023	49329023	C	G	0|1	20,3	0.21	23
2	bad responder	intergenic	ENSCAFG00000044486.1(dist=100063),ENSCAFG00000032201.2(dist=24969)	ENSCAFG00000044486	-	-	chr19	50778708	50778709	TT	-	0/1	8,17	0.635	25
2	bad responder	intergenic	ENSCAFG00000045357.1(dist=99236),ENSCAFG00000044028.1(dist=28726)	ENSCAFG00000045357	-	-	chr19	51784979	51784979	T	C	0|1	19,4	0.211	23
2	bad responder	intergenic	ENSCAFG00000045357.1(dist=99239),ENSCAFG00000044028.1(dist=28723)	ENSCAFG00000045357	-	-	chr19	51784982	51784982	G	A	0|1	19,4	0.211	23
2	bad responder	intergenic	ENSCAFG00000044028.1(dist=41023),ENSCAFG00000029252.2(dist=7582)	ENSCAFG00000044028	-	-	chr19	51883912	51883912	A	T	0|1	22,2	0.143	24
2	bad responder	intergenic	ENSCAFG00000044028.1(dist=41024),ENSCAFG00000029252.2(dist=7581)	ENSCAFG00000044028	-	-	chr19	51883913	51883913	A	T	0|1	22,2	0.143	24
2	bad responder	intergenic	ENSCAFG00000029252.2(dist=13511),ENSCAFG00000043281.1(dist=13863)	ENSCAFG00000029252	-	-	chr19	51922544	51922544	C	A	0|1	18,3	0.176	21
2	bad responder	downstream	ENSCAFG00000042365.1	ENSCAFG00000042365	-	-	chr19	51984438	51984438	A	T	0|1	22,4	0.15	26
2	bad responder	intergenic	ENSCAFG00000005653.4(dist=27040),ENSCAFG00000005659.4(dist=309659)	ENSCAFG00000005653	-	-	chr19	52232322	52232322	C	A	0/1	15,16	0.565	31
2	bad responder	intronic	ENSCAFG00000005717.5	ENSCAFG00000005717	NEB	NEB	chr19	52833570	52833570	G	A	0/1	9,8	0.5	17
2	bad responder	intergenic	ENSCAFG00000042493.1(dist=19456),ENSCAFG00000005811.7(dist=43634)	ENSCAFG00000042493	-	-	chr19	53342712	53342712	A	G	0/1	17,3	0.157	20
2	bad responder	intronic	ENSCAFG00000005811.7	ENSCAFG00000005811	FMNL2	FMNL2	chr19	53475083	53475083	A	C	0|1	26,3	0.141	29
2	bad responder	intergenic	ENSCAFG00000048444.1(dist=91049),ENSCAFG00000003666.3(dist=265438)	ENSCAFG00000048444	-	-	chr2	116543	116543	C	T	0/1	23,4	0.15	27
2	bad responder	intergenic	ENSCAFG00000048444.1(dist=255465),ENSCAFG00000003666.3(dist=101022)	ENSCAFG00000048444	-	-	chr2	280959	280959	G	C	0/1	24,5	0.182	29
2	bad responder	intergenic	ENSCAFG00000048444.1(dist=301280),ENSCAFG00000003666.3(dist=55207)	ENSCAFG00000048444	-	-	chr2	326774	326774	C	T	0/1	13,11	0.467	24
2	bad responder	intergenic	ENSCAFG00000028129.1(dist=111838),ENSCAFG00000047452.1(dist=102889)	ENSCAFG00000028129	-	-	chr2	536914	536914	G	T	0|1	33,3	0.148	36
2	bad responder	intergenic	ENSCAFG00000028129.1(dist=111847),ENSCAFG00000047452.1(dist=102880)	ENSCAFG00000028129	-	-	chr2	536923	536923	A	C	0|1	34,3	0.148	37
2	bad responder	intergenic	ENSCAFG00000042449.1(dist=13981),ENSCAFG00000003705.4(dist=31256)	ENSCAFG00000042449	-	-	chr2	1866053	1866053	A	G	0/1	18,3	0.175	21
2	bad responder	intronic	ENSCAFG00000003705.4	ENSCAFG00000003705	CUL2	CUL2	chr2	1948718	1948718	C	T	0/1	23,4	0.227	27
2	bad responder	intronic	ENSCAFG00000003705.4	ENSCAFG00000003705	CUL2	CUL2	chr2	2055377	2055377	C	G	0/1	43,6	0.184	49
2	bad responder	intronic	ENSCAFG00000003737.4	ENSCAFG00000003737	PARD3	PARD3	chr2	2607858	2607858	G	T	0|1	23,3	0.158	26
2	bad responder	intronic	ENSCAFG00000003737.4	ENSCAFG00000003737	PARD3	PARD3	chr2	2748033	2748033	T	A	0/1	21,3	0.142	24
2	bad responder	downstream	ENSCAFG00000048896.1	ENSCAFG00000048896	-	-	chr2	2978229	2978229	T	C	0/1	25,4	0.15	29
2	bad responder	intronic	ENSCAFG00000003821.4	ENSCAFG00000003821	ITGB1	ITGB1	chr2	3686239	3686239	G	A	0/1	10,3	0.248	13
2	bad responder	intergenic	ENSCAFG00000023536.4(dist=13180),ENSCAFG00000032861.2(dist=33272)	ENSCAFG00000023536	-	-	chr2	4615561	4615561	A	G	0/1	41,11	0.209	52
2	bad responder	ncRNA_exonic	ENSCAFG00000046352.1	ENSCAFG00000046352	-	-	chr2	5036769	5036769	G	A	0/1	30,9	0.258	39
2	bad responder	intergenic	ENSCAFG00000007550.4(dist=36657),ENSCAFG00000049044.1(dist=50692)	ENSCAFG00000007550	-	-	chr2	5335694	5335694	C	T	0/1	46,8	0.145	54
2	bad responder	intergenic	ENSCAFG00000013789.4(dist=70111),ENSCAFG00000014021.4(dist=6403)	ENSCAFG00000013789	-	-	chr2	6244792	6244792	G	A	0|1	34,2	0.074	36
2	bad responder	intergenic	ENSCAFG00000013789.4(dist=70112),ENSCAFG00000014021.4(dist=6402)	ENSCAFG00000013789	-	-	chr2	6244793	6244793	T	C	0|1	34,2	0.074	36
2	bad responder	intronic	ENSCAFG00000004329.5	ENSCAFG00000004329	APBB1IP	APBB1IP	chr2	7161685	7161685	T	A	0/1	21,3	0.151	24
2	bad responder	ncRNA_intronic	ENSCAFG00000049836.1	ENSCAFG00000049836	-	-	chr2	8384836	8384836	A	G	0/1	10,13	0.526	23
2	bad responder	intronic	ENSCAFG00000004237.6	ENSCAFG00000004237	KIAA1217	KIAA1217	chr2	9035801	9035801	T	C	0|1	21,2	0.167	23
2	bad responder	intronic	ENSCAFG00000004237.6	ENSCAFG00000004237	KIAA1217	KIAA1217	chr2	9035806	9035806	G	A	0|1	21,2	0.167	23
2	bad responder	intergenic	ENSCAFG00000044794.1(dist=32878),ENSCAFG00000004215.5(dist=10669)	ENSCAFG00000044794	-	-	chr2	10124443	10124443	C	T	0/1	32,9	0.29	41
2	bad responder	intergenic	ENSCAFG00000035901.2(dist=10315),ENSCAFG00000004174.5(dist=10396)	ENSCAFG00000035901	-	-	chr2	10727666	10727666	C	T	0/1	7,5	0.454	12
2	bad responder	intronic	ENSCAFG00000004145.5	ENSCAFG00000004145	MLLT10	MLLT10	chr2	11383316	11383316	C	A	0|1	19,2	0.111	21
2	bad responder	ncRNA_intronic	ENSCAFG00000033920.2	ENSCAFG00000033920	-	-	chr2	12402045	12402045	T	C	0/1	16,4	0.186	20
2	bad responder	intronic	ENSCAFG00000004117.4	ENSCAFG00000004117	PLXDC2	PLXDC2	chr2	13049326	13049326	T	A	0|1	22,4	0.182	26
2	bad responder	intronic	ENSCAFG00000004117.4	ENSCAFG00000004117	PLXDC2	PLXDC2	chr2	13049327	13049327	T	A	0|1	22,4	0.181	26
2	bad responder	intergenic	ENSCAFG00000031763.1(dist=89609),ENSCAFG00000004111.4(dist=155042)	ENSCAFG00000031763	-	-	chr2	13728966	13728966	A	G	0/1	16,4	0.2	20
2	bad responder	intergenic	ENSCAFG00000048532.1(dist=13536),ENSCAFG00000004100.5(dist=207364)	ENSCAFG00000048532	-	-	chr2	14358196	14358196	A	G	0/1	23,4	0.222	27
2	bad responder	intergenic	ENSCAFG00000048532.1(dist=17409),ENSCAFG00000004100.5(dist=203491)	ENSCAFG00000048532	-	-	chr2	14362069	14362069	G	A	0/1	15,7	0.349	22
2	bad responder	intronic	ENSCAFG00000004045.5	ENSCAFG00000004045	ARHGAP12	ARHGAP12	chr2	15011291	15011291	G	T	0|1	17,3	0.175	20
2	bad responder	ncRNA_intronic	ENSCAFG00000047559.1	ENSCAFG00000047559	-	-	chr2	16352371	16352371	T	C	0/1	24,3	0.142	27
2	bad responder	intergenic	ENSCAFG00000003980.3(dist=86857),ENSCAFG00000045754.1(dist=47446)	ENSCAFG00000003980	-	-	chr2	16827372	16827372	G	T	0|1	18,2	0.176	20
2	bad responder	intergenic	ENSCAFG00000003980.3(dist=86864),ENSCAFG00000045754.1(dist=47439)	ENSCAFG00000003980	-	-	chr2	16827379	16827379	A	C	0|1	18,2	0.176	20
2	bad responder	intronic	ENSCAFG00000003862.4	ENSCAFG00000003862	-	ARMC4	chr2	18253229	18253229	A	T	0/1	6,10	0.532	16
2	bad responder	intronic	ENSCAFG00000004474.4	ENSCAFG00000004474	CACNB2	CACNB2	chr2	18855117	18855117	T	G	0|1	23,4	0.158	27
2	bad responder	intronic	ENSCAFG00000004474.4	ENSCAFG00000004474	CACNB2	CACNB2	chr2	18855120	18855120	C	A	0|1	23,4	0.158	27
2	bad responder	intergenic	ENSCAFG00000045958.1(dist=11916),ENSCAFG00000004488.4(dist=12979)	ENSCAFG00000045958	-	-	chr2	18979052	18979052	G	A	0/1	24,5	0.208	29
2	bad responder	intronic	ENSCAFG00000004568.3	ENSCAFG00000004568	CUBN	CUBN	chr2	19845277	19845277	T	A	0/1	9,8	0.428	17
2	bad responder	intronic	ENSCAFG00000004568.3	ENSCAFG00000004568	CUBN	CUBN	chr2	19911894	19911894	T	A	0/1	32,4	0.143	36
2	bad responder	intronic	ENSCAFG00000004586.4	ENSCAFG00000004586	RSU1	RSU1	chr2	20119725	20119725	G	C	0/1	25,3	0.159	28
2	bad responder	intergenic	ENSCAFG00000030261.2(dist=158311),ENSCAFG00000023575.4(dist=329895)	ENSCAFG00000030261	-	-	chr2	20536051	20536051	T	C	0/1	22,4	0.158	26
2	bad responder	intergenic	ENSCAFG00000004714.4(dist=11565),ENSCAFG00000046603.1(dist=32908)	ENSCAFG00000004714	-	-	chr2	22095120	22095120	A	G	0/1	24,4	0.136	28
2	bad responder	intronic	ENSCAFG00000004728.6	ENSCAFG00000004728	FRMD4A	FRMD4A	chr2	22808937	22808937	A	G	0|1	32,3	0.12	35
2	bad responder	intronic	ENSCAFG00000004728.6	ENSCAFG00000004728	FRMD4A	FRMD4A	chr2	22808940	22808940	C	T	0|1	32,3	0.119	35
2	bad responder	intergenic	ENSCAFG00000004839.5(dist=37592),ENSCAFG00000004856.4(dist=2799)	ENSCAFG00000004839	-	-	chr2	24509732	24509732	A	G	0|1	31,4	0.143	35
2	bad responder	intergenic	ENSCAFG00000004839.5(dist=37597),ENSCAFG00000004856.4(dist=2794)	ENSCAFG00000004839	-	-	chr2	24509737	24509737	C	T	0|1	30,4	0.148	34
2	bad responder	exonic	ENSCAFG00000004866.4	ENSCAFG00000004866	USP6NL	USP6NL	chr2	24890498	24890498	G	A	0/1	31,3	0.125	34
2	bad responder	intronic	ENSCAFG00000004973.4	ENSCAFG00000004973	CELF2	CELF2	chr2	25019953	25019953	G	A	0/1	19,3	0.176	22
2	bad responder	intronic	ENSCAFG00000004973.4	ENSCAFG00000004973	CELF2	CELF2	chr2	25326952	25326961	GCAGAGACAC	-	0/1	30,4	0.12	34
2	bad responder	intergenic	ENSCAFG00000027249.1(dist=179803),ENSCAFG00000041822.1(dist=570340)	ENSCAFG00000027249	-	-	chr2	26375423	26375423	T	A	0|1	25,3	0.143	28
2	bad responder	intergenic	ENSCAFG00000027249.1(dist=179808),ENSCAFG00000041822.1(dist=570335)	ENSCAFG00000027249	-	-	chr2	26375428	26375428	T	A	0|1	27,3	0.136	30
2	bad responder	intergenic	ENSCAFG00000042566.1(dist=109310),ENSCAFG00000033343.2(dist=64585)	ENSCAFG00000042566	-	-	chr2	27779216	27779216	G	A	0/1	11,14	0.45	25
2	bad responder	ncRNA_intronic	ENSCAFG00000042659.1	ENSCAFG00000042659	-	-	chr2	27938016	27938016	A	C	0/1	17,10	0.428	27
2	bad responder	intronic	ENSCAFG00000005022.5	ENSCAFG00000005022	TAF3	TAF3	chr2	28183297	28183297	A	G	0/1	17,3	0.214	20
2	bad responder	intronic	ENSCAFG00000005121.4	ENSCAFG00000005121	SFMBT2	SFMBT2	chr2	28811083	28811083	C	G	0/1	37,4	0.185	41
2	bad responder	intergenic	ENSCAFG00000005169.4(dist=144714),ENSCAFG00000005194.5(dist=66701)	ENSCAFG00000005169	-	-	chr2	29650051	29650051	T	A	0/1	14,10	0.454	24
2	bad responder	intronic	ENSCAFG00000005218.4	ENSCAFG00000005218	FBH1	FBH1	chr2	30059092	30059092	G	T	0|1	16,2	0.187	18
2	bad responder	upstream	ENSCAFG00000045851.1	ENSCAFG00000045851	-	-	chr2	31598103	31598103	G	A	0/1	22,3	0.158	25
2	bad responder	intergenic	ENSCAFG00000046943.1(dist=374945),ENSCAFG00000038771.2(dist=144761)	ENSCAFG00000046943	-	-	chr2	33107025	33107025	C	T	0/1	20,4	0.25	24
2	bad responder	intergenic	ENSCAFG00000005749.4(dist=3370),ENSCAFG00000005751.5(dist=10137)	ENSCAFG00000005749	-	-	chr2	35566413	35566413	G	A	0/1	19,3	0.176	22
2	bad responder	intergenic	ENSCAFG00000006250.4(dist=178291),ENSCAFG00000031965.2(dist=83836)	ENSCAFG00000006250	-	-	chr2	37387149	37387149	G	A	0/1	23,4	0.15	27
2	bad responder	ncRNA_intronic	ENSCAFG00000034760.2	ENSCAFG00000034760	-	-	chr2	38666589	38666589	G	A	0|1	19,3	0.167	22
2	bad responder	intronic	ENSCAFG00000006326.4	ENSCAFG00000006326	KCTD16	KCTD16	chr2	39090628	39090628	G	C	0/1	28,3	0.159	31
2	bad responder	intergenic	ENSCAFG00000006326.4(dist=114935),ENSCAFG00000042703.1(dist=234766)	ENSCAFG00000006326	-	-	chr2	39302899	39302899	A	C	0|1	23,4	0.217	27
2	bad responder	intergenic	ENSCAFG00000006326.4(dist=114940),ENSCAFG00000042703.1(dist=234761)	ENSCAFG00000006326	-	-	chr2	39302904	39302904	G	T	0|1	22,4	0.227	26
2	bad responder	upstream	ENSCAFG00000023537.3	ENSCAFG00000023537	GRXCR2	GRXCR2	chr2	40329216	40329216	C	A	0|1	20,3	0.167	23
2	bad responder	intronic	ENSCAFG00000006409.4	ENSCAFG00000006409	SH3RF2	SH3RF2	chr2	40503897	40503897	T	A	0/1	23,3	0.181	26
2	bad responder	intergenic	ENSCAFG00000006511.4(dist=9684),ENSCAFG00000006542.4(dist=71445)	ENSCAFG00000006511	-	-	chr2	40934199	40934199	A	G	0|1	21,2	0.166	23
2	bad responder	intergenic	ENSCAFG00000006511.4(dist=9687),ENSCAFG00000006542.4(dist=71442)	ENSCAFG00000006511	-	-	chr2	40934202	40934202	C	T	0|1	21,2	0.167	23
2	bad responder	intronic	ENSCAFG00000006542.4	ENSCAFG00000006542	PPP2R2B	PPP2R2B	chr2	41377886	41377886	T	A	0/1	21,2	0.158	23
2	bad responder	intronic	ENSCAFG00000006607.4	ENSCAFG00000006607	DPYSL3	DPYSL3	chr2	41786075	41786075	C	T	0|1	22,3	0.176	25
2	bad responder	intronic	ENSCAFG00000006634.5	ENSCAFG00000006634	JAKMIP2	JAKMIP2	chr2	41937724	41937724	G	A	0/1	24,4	0.142	28
2	bad responder	intronic	ENSCAFG00000006818.4	ENSCAFG00000006818	MTREX	MTREX	chr2	42748925	42748925	A	C	0|1	29,3	0.124	32
2	bad responder	intronic	ENSCAFG00000006818.4	ENSCAFG00000006818	MTREX	MTREX	chr2	42748930	42748930	G	T	0|1	28,3	0.125	31
2	bad responder	intergenic	ENSCAFG00000006838.4(dist=4084),ENSCAFG00000006851.5(dist=63608)	ENSCAFG00000006838	-	-	chr2	42858886	42858886	A	G	0/1	19,3	0.175	22
2	bad responder	intergenic	ENSCAFG00000006838.4(dist=62545),ENSCAFG00000006851.5(dist=5147)	ENSCAFG00000006838	-	-	chr2	42917347	42917347	T	A	0/1	30,5	0.192	35
2	bad responder	intergenic	ENSCAFG00000021414.1(dist=158052),ENSCAFG00000007133.4(dist=85772)	ENSCAFG00000021414	-	-	chr2	47210884	47210884	C	T	0/1	11,8	0.5	19
2	bad responder	intergenic	ENSCAFG00000036507.2(dist=1048),ENSCAFG00000010097.4(dist=88584)	ENSCAFG00000036507	-	-	chr2	48343147	48343147	T	A	0|1	15,4	0.267	19
2	bad responder	intergenic	ENSCAFG00000036507.2(dist=1053),ENSCAFG00000010097.4(dist=88579)	ENSCAFG00000036507	-	-	chr2	48343152	48343152	T	A	0|1	15,4	0.266	19
2	bad responder	intergenic	ENSCAFG00000010097.4(dist=70182),ENSCAFG00000007191.5(dist=142583)	ENSCAFG00000010097	-	-	chr2	48502797	48502797	-	T	0/1	9,14	0.578	23
2	bad responder	intergenic	ENSCAFG00000010097.4(dist=153553),ENSCAFG00000007191.5(dist=59212)	ENSCAFG00000010097	-	-	chr2	48586168	48586168	A	G	0/1	18,3	0.176	21
2	bad responder	intergenic	ENSCAFG00000007211.4(dist=4033),ENSCAFG00000007240.4(dist=29197)	ENSCAFG00000007211	-	-	chr2	48732599	48732599	G	A	0|1	16,2	0.13	18
2	bad responder	intergenic	ENSCAFG00000007211.4(dist=4034),ENSCAFG00000007240.4(dist=29196)	ENSCAFG00000007211	-	-	chr2	48732600	48732600	G	T	0|1	16,2	0.13	18
2	bad responder	intergenic	ENSCAFG00000046589.1(dist=8416),ENSCAFG00000044860.1(dist=100521)	ENSCAFG00000046589	-	-	chr2	48995552	48995552	C	T	0|1	31,2	0.077	33
2	bad responder	intergenic	ENSCAFG00000046589.1(dist=8423),ENSCAFG00000044860.1(dist=100514)	ENSCAFG00000046589	-	-	chr2	48995559	48995559	A	G	0|1	32,2	0.074	34
2	bad responder	intergenic	ENSCAFG00000046589.1(dist=88522),ENSCAFG00000044860.1(dist=20415)	ENSCAFG00000046589	-	-	chr2	49075658	49075658	G	A	0/1	31,3	0.111	34
2	bad responder	intergenic	ENSCAFG00000047493.1(dist=51547),ENSCAFG00000007276.4(dist=53914)	ENSCAFG00000047493	-	-	chr2	49948826	49948826	C	T	0/1	13,15	0.524	28
2	bad responder	upstream	ENSCAFG00000049259.1	ENSCAFG00000049259	-	-	chr2	51963798	51963798	C	G	0/1	27,3	0.167	30
2	bad responder	intronic	ENSCAFG00000007586.4,ENSCAFG00000042414.1	ENSCAFG00000007586	MAST4	MAST4	chr2	52471379	52471379	T	A	0|1	33,3	0.154	36
2	bad responder	intronic	ENSCAFG00000007586.4,ENSCAFG00000042414.1	ENSCAFG00000007586	MAST4	MAST4	chr2	52471382	52471382	T	A	0|1	33,3	0.154	36
2	bad responder	intergenic	ENSCAFG00000007594.4(dist=215773),ENSCAFG00000049004.1(dist=34193)	ENSCAFG00000007594	-	-	chr2	52876563	52876563	C	-	0/1	16,11	0.401	27
2	bad responder	intergenic	ENSCAFG00000036451.2(dist=116818),ENSCAFG00000042361.1(dist=112277)	ENSCAFG00000036451	-	-	chr2	53861463	53861463	G	A	0/1	13,16	0.565	29
2	bad responder	ncRNA_intronic	ENSCAFG00000042361.1	ENSCAFG00000042361	-	-	chr2	54067622	54067622	-	CA	0/1	29,4	0.114	33
2	bad responder	ncRNA_intronic	ENSCAFG00000038356.2	ENSCAFG00000038356	-	-	chr2	54951582	54951582	G	T	0/1	9,17	0.632	26
2	bad responder	intronic	ENSCAFG00000007967.4	ENSCAFG00000007967	MRPS27	MRPS27	chr2	55335139	55335139	A	G	0/1	15,3	0.214	18
2	bad responder	intergenic	ENSCAFG00000007982.4(dist=67719),ENSCAFG00000007986.4(dist=8237)	ENSCAFG00000007982	-	-	chr2	55450465	55450465	T	-	0/1	10,16	0.551	26
2	bad responder	intronic	ENSCAFG00000008274.5	ENSCAFG00000008274	ARHGEF28	ARHGEF28	chr2	56491374	56491374	A	G	0/1	15,4	0.176	19
2	bad responder	intergenic	ENSCAFG00000023621.3(dist=71602),ENSCAFG00000048431.1(dist=21500)	ENSCAFG00000023621	-	-	chr2	57486163	57486163	A	T	0|1	19,2	0.167	21
2	bad responder	intergenic	ENSCAFG00000023621.3(dist=71603),ENSCAFG00000048431.1(dist=21499)	ENSCAFG00000023621	-	-	chr2	57486164	57486164	A	T	0|1	19,2	0.167	21
2	bad responder	intergenic	ENSCAFG00000008495.4(dist=39812),ENSCAFG00000030756.2(dist=33119)	ENSCAFG00000008495	-	-	chr2	58285031	58285031	A	C	0|1	37,4	0.166	41
2	bad responder	intergenic	ENSCAFG00000008495.4(dist=39817),ENSCAFG00000030756.2(dist=33114)	ENSCAFG00000008495	-	-	chr2	58285036	58285036	G	T	0|1	38,4	0.161	42
2	bad responder	intronic	ENSCAFG00000008693.5	ENSCAFG00000008693	ADGRG3	ADGRG3	chr2	58782828	58782828	T	C	0/1	29,3	0.167	32
2	bad responder	intronic	ENSCAFG00000008693.5	ENSCAFG00000008693	ADGRG3	ADGRG3	chr2	58788192	58788192	C	T	0/1	20,12	0.4	32
2	bad responder	intronic	ENSCAFG00000008855.4	ENSCAFG00000008855	CPNE2	CPNE2	chr2	59233823	59233823	C	T	0|1	33,3	0.148	36
2	bad responder	intergenic	ENSCAFG00000048133.1(dist=5398),ENSCAFG00000034661.2(dist=26278)	ENSCAFG00000048133	-	-	chr2	60555857	60555857	G	C	0/1	24,3	0.143	27
2	bad responder	intergenic	ENSCAFG00000009430.5(dist=28841),ENSCAFG00000039597.2(dist=117391)	ENSCAFG00000009430	-	-	chr2	60665257	60665257	C	T	0/1	11,11	0.437	22
2	bad responder	intergenic	ENSCAFG00000009430.5(dist=62763),ENSCAFG00000039597.2(dist=83469)	ENSCAFG00000009430	-	-	chr2	60699179	60699179	A	G	0/1	16,17	0.5	33
2	bad responder	intergenic	ENSCAFG00000047930.1(dist=43081),ENSCAFG00000009443.6(dist=77841)	ENSCAFG00000047930	-	-	chr2	60890352	60890352	A	G	0/1	21,13	0.423	34
2	bad responder	intronic	ENSCAFG00000009463.4	ENSCAFG00000009463	FTO	FTO	chr2	61902653	61902653	T	C	0/1	21,3	0.136	24
2	bad responder	intronic	ENSCAFG00000009463.4	ENSCAFG00000009463	FTO	FTO	chr2	61909245	61909245	T	C	0/1	15,18	0.542	33
2	bad responder	intronic	ENSCAFG00000009463.4	ENSCAFG00000009463	FTO	FTO	chr2	62006017	62006017	G	A	0|1	34,3	0.148	37
2	bad responder	intronic	ENSCAFG00000009463.4	ENSCAFG00000009463	FTO	FTO	chr2	62006018	62006018	G	C	0|1	34,3	0.148	37
2	bad responder	intronic	ENSCAFG00000009463.4	ENSCAFG00000009463	FTO	FTO	chr2	62029094	62029094	T	C	0/1	24,10	0.346	34
2	bad responder	intronic	ENSCAFG00000009722.4	ENSCAFG00000009722	TOX3	TOX3	chr2	63036771	63036771	G	A	0|1	17,3	0.176	20
2	bad responder	intergenic	ENSCAFG00000045856.1(dist=54591),ENSCAFG00000043366.1(dist=5491)	ENSCAFG00000045856	-	-	chr2	63672260	63672260	A	T	0|1	42,2	0.097	44
2	bad responder	intergenic	ENSCAFG00000043366.1(dist=13311),ENSCAFG00000045090.1(dist=7536)	ENSCAFG00000043366	-	-	chr2	63692842	63692842	A	G	0/1	16,3	0.186	19
2	bad responder	intergenic	ENSCAFG00000010008.4(dist=36531),ENSCAFG00000041678.1(dist=225686)	ENSCAFG00000010008	-	-	chr2	66013710	66013710	G	T	0|1	32,3	0.143	35
2	bad responder	intergenic	ENSCAFG00000010008.4(dist=36534),ENSCAFG00000041678.1(dist=225683)	ENSCAFG00000010008	-	-	chr2	66013713	66013713	A	C	0|1	32,3	0.143	35
2	bad responder	intergenic	ENSCAFG00000010008.4(dist=70550),ENSCAFG00000041678.1(dist=191667)	ENSCAFG00000010008	-	-	chr2	66047729	66047729	T	C	0|1	31,4	0.159	35
2	bad responder	intergenic	ENSCAFG00000010008.4(dist=70551),ENSCAFG00000041678.1(dist=191666)	ENSCAFG00000010008	-	-	chr2	66047730	66047730	G	A	0|1	31,4	0.159	35
2	bad responder	intergenic	ENSCAFG00000041678.1(dist=106469),ENSCAFG00000010010.4(dist=196223)	ENSCAFG00000041678	-	-	chr2	66348454	66348454	C	T	0/1	22,4	0.149	26
2	bad responder	intergenic	ENSCAFG00000010194.5(dist=70860),ENSCAFG00000047025.1(dist=45138)	ENSCAFG00000010194	-	-	chr2	67038920	67038920	C	G	0/1	24,4	0.216	28
2	bad responder	intronic	ENSCAFG00000010340.6	ENSCAFG00000010340	PHC2	PHC2	chr2	68072382	68072382	G	C	0|1	30,4	0.12	34
2	bad responder	intronic	ENSCAFG00000010369.4	ENSCAFG00000010369	AZIN2	AZIN2	chr2	68313917	68313917	T	C	0/1	20,3	0.143	23
2	bad responder	intergenic	ENSCAFG00000048352.1(dist=16521),ENSCAFG00000031070.1(dist=1110)	ENSCAFG00000048352	-	-	chr2	68405291	68405291	C	T	0/1	23,3	0.136	26
2	bad responder	intronic	ENSCAFG00000011149.5	ENSCAFG00000011149	SNRNP40	SNRNP40	chr2	69722955	69722955	T	A	0|1	26,5	0.19	31
2	bad responder	intronic	ENSCAFG00000011149.5	ENSCAFG00000011149	SNRNP40	SNRNP40	chr2	69722963	69722963	G	T	0|1	22,5	0.199	27
2	bad responder	intronic	ENSCAFG00000011205.5	ENSCAFG00000011205	PUM1	PUM1	chr2	69986450	69986450	G	T	0|1	30,3	0.159	33
2	bad responder	intronic	ENSCAFG00000011205.5	ENSCAFG00000011205	PUM1	PUM1	chr2	69986453	69986453	A	C	0|1	30,3	0.159	33
2	bad responder	intronic	ENSCAFG00000011801.5	ENSCAFG00000011801	PHACTR4	PHACTR4	chr2	72032991	72032991	A	C	0|1	15,5	0.25	20
2	bad responder	intronic	ENSCAFG00000011801.5	ENSCAFG00000011801	PHACTR4	PHACTR4	chr2	72032996	72032996	G	T	0|1	15,5	0.25	20
2	bad responder	upstream	ENSCAFG00000049314.1	ENSCAFG00000049314	PPP1R8	PPP1R8	chr2	72539185	72539185	C	-	0|1	32,2	0.076	34
2	bad responder	intergenic	ENSCAFG00000012095.4(dist=4638),ENSCAFG00000012104.5(dist=93282)	ENSCAFG00000012095	-	-	chr2	72757243	72757243	C	T	0/1	27,3	0.136	30
2	bad responder	intronic	ENSCAFG00000012207.4	ENSCAFG00000012207	SLC9A1	SLC9A1	chr2	73063209	73063209	T	A	0|1	45,3	0.12	48
2	bad responder	intergenic	ENSCAFG00000012207.4(dist=12399),ENSCAFG00000028558.2(dist=16098)	ENSCAFG00000012207	-	-	chr2	73115763	73115763	G	T	0/1	20,3	0.158	23
2	bad responder	intergenic	ENSCAFG00000012408.5(dist=15686),ENSCAFG00000049767.1(dist=1512)	ENSCAFG00000012408	-	-	chr2	73550064	73550064	C	G	0/1	24,4	0.165	28
2	bad responder	intronic	ENSCAFG00000012615.4	ENSCAFG00000012615	CATSPER4	CATSPER4	chr2	73800675	73800675	A	T	0|1	11,3	0.286	14
2	bad responder	intronic	ENSCAFG00000012615.4	ENSCAFG00000012615	CATSPER4	CATSPER4	chr2	73800676	73800676	A	T	0|1	11,3	0.286	14
2	bad responder	intronic	ENSCAFG00000012769.5	ENSCAFG00000012769	MAN1C1	MAN1C1	chr2	74298311	74298311	C	T	0/1	27,3	0.136	30
2	bad responder	intergenic	ENSCAFG00000027966.1(dist=22306),ENSCAFG00000042716.1(dist=104655)	ENSCAFG00000027966	-	-	chr2	74639943	74639943	T	A	0/1	26,4	0.167	30
2	bad responder	intergenic	ENSCAFG00000027966.1(dist=72461),ENSCAFG00000042716.1(dist=54500)	ENSCAFG00000027966	-	-	chr2	74690098	74690098	G	A	0/1	14,18	0.536	32
2	bad responder	intergenic	ENSCAFG00000012903.5(dist=7339),ENSCAFG00000012914.5(dist=42662)	ENSCAFG00000012903	-	-	chr2	74864286	74864286	A	G	0/1	14,4	0.231	18
2	bad responder	intergenic	ENSCAFG00000013042.4(dist=57436),ENSCAFG00000049404.1(dist=1746)	ENSCAFG00000013042	-	-	chr2	75585838	75585838	A	G	0|1	30,5	0.148	35
2	bad responder	intergenic	ENSCAFG00000013042.4(dist=57437),ENSCAFG00000049404.1(dist=1745)	ENSCAFG00000013042	-	-	chr2	75585839	75585839	C	T	0|1	29,5	0.154	34
2	bad responder	intergenic	ENSCAFG00000014661.4(dist=4268),ENSCAFG00000014707.5(dist=21716)	ENSCAFG00000014661	-	-	chr2	77131379	77131379	G	C	0|1	26,7	0.269	33
2	bad responder	intergenic	ENSCAFG00000014661.4(dist=4271),ENSCAFG00000014707.5(dist=21713)	ENSCAFG00000014661	-	-	chr2	77131382	77131382	G	C	0|1	26,7	0.269	33
2	bad responder	intergenic	ENSCAFG00000015137.4(dist=18247),ENSCAFG00000040934.2(dist=10298)	ENSCAFG00000015137	-	-	chr2	79121067	79121067	A	T	0|1	26,4	0.208	30
2	bad responder	intergenic	ENSCAFG00000015137.4(dist=18248),ENSCAFG00000040934.2(dist=10297)	ENSCAFG00000015137	-	-	chr2	79121068	79121068	A	T	0|1	26,4	0.208	30
2	bad responder	intronic	ENSCAFG00000015539.4	ENSCAFG00000015539	PAX7	PAX7	chr2	79876650	79876650	A	-	0/1	0,14	0.921	14
2	bad responder	intronic	ENSCAFG00000015595.5	ENSCAFG00000015595	IGSF21	IGSF21	chr2	80257530	80257530	G	A	0/1	27,3	0.12	30
2	bad responder	intergenic	ENSCAFG00000041951.1(dist=20993),ENSCAFG00000047466.1(dist=9002)	ENSCAFG00000041951	-	-	chr2	82370720	82370720	G	A	0/1	17,3	0.157	20
2	bad responder	intergenic	ENSCAFG00000047466.1(dist=11500),ENSCAFG00000033261.2(dist=500000)	ENSCAFG00000047466	-	-	chr2	82501531	82501531	C	T	0/1	24,3	0.149	27
2	bad responder	intergenic	ENSCAFG00000047466.1(dist=54127),ENSCAFG00000033261.2(dist=457373)	ENSCAFG00000047466	-	-	chr2	82544158	82544158	A	T	0/1	32,4	0.193	36
2	bad responder	intergenic	ENSCAFG00000047466.1(dist=213809),ENSCAFG00000033261.2(dist=297691)	ENSCAFG00000047466	-	-	chr2	82703840	82703840	A	-	0/1	13,16	0.563	29
2	bad responder	intergenic	ENSCAFG00000047466.1(dist=223853),ENSCAFG00000033261.2(dist=287647)	ENSCAFG00000047466	-	-	chr2	82713884	82713884	T	A	0/1	34,5	0.17	39
2	bad responder	intergenic	ENSCAFG00000047466.1(dist=335495),ENSCAFG00000033261.2(dist=176005)	ENSCAFG00000047466	-	-	chr2	82825526	82825526	C	G	0|1	44,2	0.059	46
2	bad responder	intergenic	ENSCAFG00000047466.1(dist=386610),ENSCAFG00000033261.2(dist=124890)	ENSCAFG00000047466	-	-	chr2	82876641	82876641	T	C	0/1	16,3	0.176	19
2	bad responder	intergenic	ENSCAFG00000047466.1(dist=477328),ENSCAFG00000033261.2(dist=34172)	ENSCAFG00000047466	-	-	chr2	82967359	82967359	T	C	0/1	16,3	0.2	19
2	bad responder	intergenic	ENSCAFG00000016352.4(dist=89622),ENSCAFG00000016356.2(dist=191763)	ENSCAFG00000016352	-	-	chr2	83103768	83103768	T	C	0/1	23,4	0.157	27
2	bad responder	intergenic	ENSCAFG00000016364.5(dist=25588),ENSCAFG00000016366.4(dist=34395)	ENSCAFG00000016364	-	-	chr2	83679291	83679291	C	A	0/1	14,8	0.333	22
2	bad responder	intronic	ENSCAFG00000016397.5	ENSCAFG00000016397	VPS13D	VPS13D	chr2	83930207	83930207	G	C	0/1	97,6	0.079	103
2	bad responder	intronic	ENSCAFG00000016397.5	ENSCAFG00000016397	VPS13D	VPS13D	chr2	84056662	84056662	G	C	0/1	85,4	0.074	89
2	bad responder	intronic	ENSCAFG00000016397.5	ENSCAFG00000016397	VPS13D	VPS13D	chr2	84128749	84128749	G	C	0/1	100,4	0.071	104
2	bad responder	intergenic	ENSCAFG00000029614.2(dist=1533),ENSCAFG00000049786.1(dist=9346)	ENSCAFG00000029614	-	-	chr2	84582289	84582289	C	T	0|1	32,2	0.107	34
2	bad responder	intergenic	ENSCAFG00000029614.2(dist=1536),ENSCAFG00000049786.1(dist=9343)	ENSCAFG00000029614	-	-	chr2	84582292	84582292	A	G	0|1	32,2	0.107	34
2	bad responder	intronic	ENSCAFG00000016648.5	ENSCAFG00000016648	MTOR	MTOR	chr2	84907121	84907121	C	A	0|1	22,4	0.227	26
2	bad responder	intronic	ENSCAFG00000003989.4	ENSCAFG00000003989	PLXNA1	PLXNA1	chr20	914327	914327	T	A	0|1	33,2	0.125	35
2	bad responder	intronic	ENSCAFG00000003989.4	ENSCAFG00000003989	PLXNA1	PLXNA1	chr20	1049788	1049788	A	T	0/1	27,3	0.136	30
2	bad responder	intergenic	ENSCAFG00000003989.4(dist=16483),ENSCAFG00000035976.2(dist=68147)	ENSCAFG00000003989	-	-	chr20	1200804	1200804	G	A	0/1	17,14	0.417	31
2	bad responder	intergenic	ENSCAFG00000004052.5(dist=2059),ENSCAFG00000004072.6(dist=12241)	ENSCAFG00000004052	-	-	chr20	1704425	1704425	A	G	0/1	18,3	0.175	21
2	bad responder	intronic	ENSCAFG00000004093.4	ENSCAFG00000004093	MGLL	MGLL	chr20	1902384	1902384	G	C	0|1	30,5	0.167	35
2	bad responder	intronic	ENSCAFG00000004093.4	ENSCAFG00000004093	MGLL	MGLL	chr20	1902385	1902385	G	C	0|1	30,5	0.167	35
2	bad responder	intronic	ENSCAFG00000004135.5	ENSCAFG00000004135	EEFSEC	EEFSEC	chr20	2266680	2266680	T	A	0/1	37,4	0.133	41
2	bad responder	intronic	ENSCAFG00000004135.5	ENSCAFG00000004135	EEFSEC	EEFSEC	chr20	2378674	2378674	T	C	0/1	17,4	0.188	21
2	bad responder	intronic	ENSCAFG00000004350.4	ENSCAFG00000004350	ACAD9	ACAD9	chr20	3163949	3163949	T	G	0/1	31,9	0.239	40
2	bad responder	intronic	ENSCAFG00000004350.4	ENSCAFG00000004350	ACAD9	ACAD9	chr20	3204845	3204845	A	G	0/1	24,5	0.189	29
2	bad responder	intronic	ENSCAFG00000004406.5	ENSCAFG00000004406	FBLN2	FBLN2	chr20	3933743	3933743	A	T	0|1	29,3	0.13	32
2	bad responder	intergenic	ENSCAFG00000004406.5(dist=8352),ENSCAFG00000042482.1(dist=8686)	ENSCAFG00000004406	-	-	chr20	3943069	3943069	T	G	0|1	34,3	0.112	37
2	bad responder	intergenic	ENSCAFG00000046802.1(dist=63039),ENSCAFG00000004438.4(dist=8289)	ENSCAFG00000046802	-	-	chr20	4259394	4259394	A	G	0/1	24,4	0.158	28
2	bad responder	intergenic	ENSCAFG00000004492.5(dist=67602),ENSCAFG00000004495.4(dist=8677)	ENSCAFG00000004492	-	-	chr20	4744865	4744865	T	A	0|1	35,4	0.129	39
2	bad responder	intronic	ENSCAFG00000004521.5	ENSCAFG00000004521	FGD5	FGD5	chr20	4938181	4938181	A	T	0/1	24,3	0.157	27
2	bad responder	intronic	ENSCAFG00000004596.4	ENSCAFG00000004596	TMCC1	TMCC1	chr20	5471355	5471355	T	A	0/1	22,7	0.29	29
2	bad responder	intronic	ENSCAFG00000004596.4	ENSCAFG00000004596	TMCC1	TMCC1	chr20	5508344	5508344	T	C	0|1	33,6	0.226	39
2	bad responder	intronic	ENSCAFG00000004596.4	ENSCAFG00000004596	TMCC1	TMCC1	chr20	5508345	5508345	G	A	0|1	33,6	0.226	39
2	bad responder	intronic	ENSCAFG00000005023.4	ENSCAFG00000005023	HRH1	HRH1	chr20	7224413	7224413	T	A	0/1	34,4	0.161	38
2	bad responder	intronic	ENSCAFG00000005033.4	ENSCAFG00000005033	SLC6A1	SLC6A1	chr20	7354210	7354210	G	A	0/1	14,12	0.45	26
2	bad responder	intronic	ENSCAFG00000023412.4	ENSCAFG00000023412	SLC6A11	SLC6A11	chr20	7441349	7441349	T	A	0|1	38,2	0.111	40
2	bad responder	intronic	ENSCAFG00000023412.4	ENSCAFG00000023412	SLC6A11	SLC6A11	chr20	7441354	7441354	T	A	0|1	39,2	0.107	41
2	bad responder	intronic	ENSCAFG00000005118.4	ENSCAFG00000005118	SEC13	SEC13	chr20	8043828	8043828	T	A	0/1	24,5	0.167	29
2	bad responder	intronic	ENSCAFG00000029592.2	ENSCAFG00000029592	LHFPL4	LHFPL4	chr20	8642586	8642586	A	C	0|1	25,5	0.227	30
2	bad responder	intronic	ENSCAFG00000029592.2	ENSCAFG00000029592	LHFPL4	LHFPL4	chr20	8642591	8642591	G	T	0|1	25,5	0.227	30
2	bad responder	intronic	ENSCAFG00000005553.4	ENSCAFG00000005553	OXTR	OXTR	chr20	9375561	9375561	A	C	0|1	20,3	0.187	23
2	bad responder	intronic	ENSCAFG00000005553.4	ENSCAFG00000005553	OXTR	OXTR	chr20	9375566	9375566	G	T	0|1	20,3	0.187	23
2	bad responder	ncRNA_intronic	ENSCAFG00000048777.1	ENSCAFG00000048777	-	-	chr20	9639770	9639770	C	T	0/1	20,3	0.15	23
2	bad responder	ncRNA_intronic	ENSCAFG00000048777.1	ENSCAFG00000048777	-	-	chr20	9657591	9657591	C	G	0/1	39,3	0.142	42
2	bad responder	intronic	ENSCAFG00000005583.5	ENSCAFG00000005583	GRM7	GRM7	chr20	10639058	10639058	A	C	0|1	10,5	0.308	15
2	bad responder	intronic	ENSCAFG00000005583.5	ENSCAFG00000005583	GRM7	GRM7	chr20	10639059	10639059	A	T	0|1	10,5	0.308	15
2	bad responder	intronic	ENSCAFG00000005583.5	ENSCAFG00000005583	GRM7	GRM7	chr20	10788918	10788918	A	C	0/1	26,4	0.19	30
2	bad responder	intronic	ENSCAFG00000005583.5	ENSCAFG00000005583	GRM7	GRM7	chr20	10859188	10859188	G	A	0/1	24,3	0.136	27
2	bad responder	intergenic	ENSCAFG00000033124.2(dist=340992),ENSCAFG00000006061.5(dist=282460)	ENSCAFG00000033124	-	-	chr20	15621131	15621131	T	C	0/1	23,3	0.143	26
2	bad responder	intergenic	ENSCAFG00000033124.2(dist=530835),ENSCAFG00000006061.5(dist=92617)	ENSCAFG00000033124	-	-	chr20	15810974	15810974	T	C	0|1	13,4	0.354	17
2	bad responder	intronic	ENSCAFG00000006061.5	ENSCAFG00000006061	CNTN6	CNTN6	chr20	16066821	16066821	T	C	0/1	15,8	0.375	23
2	bad responder	intergenic	ENSCAFG00000006061.5(dist=141313),ENSCAFG00000029305.1(dist=103997)	ENSCAFG00000006061	-	-	chr20	16316632	16316632	T	C	0/1	14,11	0.412	25
2	bad responder	ncRNA_intronic	ENSCAFG00000036137.2	ENSCAFG00000036137	-	-	chr20	21373823	21373823	C	T	0/1	18,3	0.166	21
2	bad responder	intronic	ENSCAFG00000006496.5	ENSCAFG00000006496	MITF	MITF	chr20	21770604	21770604	G	A	0/1	15,13	0.5	28
2	bad responder	intergenic	ENSCAFG00000043758.1(dist=7623),ENSCAFG00000042878.1(dist=17678)	ENSCAFG00000043758	-	-	chr20	22081300	22081300	-	A	0/1	12,17	0.548	29
2	bad responder	intergenic	ENSCAFG00000042878.1(dist=4282),ENSCAFG00000033367.2(dist=17248)	ENSCAFG00000042878	-	-	chr20	22108628	22108628	A	C	0|1	7,3	0.333	10
2	bad responder	intergenic	ENSCAFG00000042878.1(dist=4287),ENSCAFG00000033367.2(dist=17243)	ENSCAFG00000042878	-	-	chr20	22108633	22108633	G	T	0|1	8,3	0.333	11
2	bad responder	intergenic	ENSCAFG00000006573.5(dist=161509),ENSCAFG00000030453.2(dist=7098)	ENSCAFG00000006573	-	-	chr20	23124340	23124340	T	A	0/1	26,8	0.226	34
2	bad responder	intergenic	ENSCAFG00000030453.2(dist=20551),ENSCAFG00000043969.1(dist=204743)	ENSCAFG00000030453	-	-	chr20	23639530	23639530	T	C	0|1	27,4	0.167	31
2	bad responder	intergenic	ENSCAFG00000030453.2(dist=20552),ENSCAFG00000043969.1(dist=204742)	ENSCAFG00000030453	-	-	chr20	23639531	23639531	G	A	0|1	27,4	0.167	31
2	bad responder	intergenic	ENSCAFG00000006612.5(dist=75635),ENSCAFG00000049880.1(dist=23422)	ENSCAFG00000006612	-	-	chr20	24258504	24258504	A	C	0|1	17,4	0.263	21
2	bad responder	intergenic	ENSCAFG00000006612.5(dist=75640),ENSCAFG00000049880.1(dist=23417)	ENSCAFG00000006612	-	-	chr20	24258509	24258509	G	T	0|1	17,4	0.263	21
2	bad responder	downstream	ENSCAFG00000049880.1	ENSCAFG00000049880	-	-	chr20	24281262	24281262	G	T	0|1	27,4	0.154	31
2	bad responder	ncRNA_intronic	ENSCAFG00000049225.1,ENSCAFG00000049880.1	ENSCAFG00000049225	-	-	chr20	24402622	24402622	A	G	0/1	23,3	0.167	26
2	bad responder	intergenic	ENSCAFG00000045364.1(dist=28335),ENSCAFG00000049126.1(dist=43750)	ENSCAFG00000045364	-	-	chr20	24811464	24811464	A	T	0|1	20,1	0.132	21
2	bad responder	intronic	ENSCAFG00000006722.5	ENSCAFG00000006722	MAGI1	MAGI1	chr20	25385227	25385227	T	C	0/1	16,8	0.333	24
2	bad responder	intronic	ENSCAFG00000006804.5	ENSCAFG00000006804	PRICKLE2	PRICKLE2	chr20	26836482	26836482	G	C	0|1	20,2	0.167	22
2	bad responder	intronic	ENSCAFG00000006804.5	ENSCAFG00000006804	PRICKLE2	PRICKLE2	chr20	26836485	26836485	G	C	0|1	20,2	0.167	22
2	bad responder	intronic	ENSCAFG00000006804.5	ENSCAFG00000006804	PRICKLE2	PRICKLE2	chr20	27008579	27008579	A	C	0|1	23,3	0.2	26
2	bad responder	intronic	ENSCAFG00000007072.4	ENSCAFG00000007072	CADPS	-	chr20	28312901	28312901	G	A	0/1	15,10	0.468	25
2	bad responder	intronic	ENSCAFG00000007072.4	ENSCAFG00000007072	CADPS	-	chr20	28393806	28393806	C	T	0/1	21,8	0.285	29
2	bad responder	intronic	ENSCAFG00000007072.4	ENSCAFG00000007072	CADPS	-	chr20	28420899	28420899	C	T	0/1	25,9	0.261	34
2	bad responder	intronic	ENSCAFG00000007072.4	ENSCAFG00000007072	CADPS	-	chr20	28651552	28651552	G	C	0/1	13,4	0.357	17
2	bad responder	intronic	ENSCAFG00000007072.4	ENSCAFG00000007072	CADPS	-	chr20	28651561	28651561	G	C	0/1	14,4	0.357	18
2	bad responder	intronic	ENSCAFG00000007072.4	ENSCAFG00000007072	CADPS	-	chr20	28662019	28662019	T	C	0/1	22,11	0.36	33
2	bad responder	intergenic	ENSCAFG00000007152.7(dist=30497),ENSCAFG00000044800.1(dist=160905)	ENSCAFG00000007152	-	-	chr20	29511642	29511642	G	C	0/1	14,9	0.389	23
2	bad responder	intergenic	ENSCAFG00000034615.2(dist=118450),ENSCAFG00000007205.4(dist=173949)	ENSCAFG00000034615	-	-	chr20	31528981	31528981	G	A	0|1	19,4	0.167	23
2	bad responder	intergenic	ENSCAFG00000034615.2(dist=118457),ENSCAFG00000007205.4(dist=173942)	ENSCAFG00000034615	-	-	chr20	31528988	31528988	G	A	0|1	19,4	0.166	23
2	bad responder	intergenic	ENSCAFG00000034615.2(dist=138023),ENSCAFG00000007205.4(dist=154376)	ENSCAFG00000034615	-	-	chr20	31548554	31548554	T	G	0/1	19,7	0.288	26
2	bad responder	intergenic	ENSCAFG00000034615.2(dist=257645),ENSCAFG00000007205.4(dist=34754)	ENSCAFG00000034615	-	-	chr20	31668176	31668176	G	A	0|1	20,4	0.211	24
2	bad responder	intergenic	ENSCAFG00000034615.2(dist=257646),ENSCAFG00000007205.4(dist=34753)	ENSCAFG00000034615	-	-	chr20	31668177	31668177	T	C	0|1	20,4	0.211	24
2	bad responder	intronic	ENSCAFG00000007695.5	ENSCAFG00000007695	SLMAP	SLMAP	chr20	32683338	32683338	T	A	0/1	15,3	0.222	18
2	bad responder	intronic	ENSCAFG00000007873.5	ENSCAFG00000007873	DNAH12	DNAH12	chr20	33058783	33058783	G	T	0|1	36,4	0.166	40
2	bad responder	intronic	ENSCAFG00000008023.3	ENSCAFG00000008023	IL17RD	IL17RD	chr20	33271059	33271059	C	G	0/1	25,2	0.111	27
2	bad responder	intronic	ENSCAFG00000008023.3	ENSCAFG00000008023	IL17RD	IL17RD	chr20	33300973	33300973	C	T	0/1	12,17	0.583	29
2	bad responder	intronic	ENSCAFG00000008140.5	ENSCAFG00000008140	ERC2	ERC2	chr20	34554621	34554621	T	A	0|1	22,2	0.15	24
2	bad responder	intronic	ENSCAFG00000008211.5	ENSCAFG00000008211	CACNA2D3	CACNA2D3	chr20	35454760	35454760	C	A	0|1	18,5	0.278	23
2	bad responder	intronic	ENSCAFG00000008211.5	ENSCAFG00000008211	CACNA2D3	CACNA2D3	chr20	35454767	35454767	T	G	0|1	17,5	0.278	22
2	bad responder	intergenic	ENSCAFG00000049517.1(dist=41223),ENSCAFG00000046034.1(dist=4357)	ENSCAFG00000049517	-	-	chr20	36104791	36104791	G	C	0|1	20,2	0.111	22
2	bad responder	intronic	ENSCAFG00000008525.5	ENSCAFG00000008525	CACNA1D	CACNA1D	chr20	36527691	36527691	A	G	0/1	30,3	0.111	33
2	bad responder	intergenic	ENSCAFG00000008732.4(dist=7749),ENSCAFG00000041071.1(dist=17135)	ENSCAFG00000008732	-	-	chr20	36826960	36826960	G	A	0/1	19,3	0.158	22
2	bad responder	intronic	ENSCAFG00000009520.5,ENSCAFG00000009717.4	ENSCAFG00000009520	BAP1	BAP1	chr20	37416876	37416876	C	A	0/1	18,3	0.15	21
2	bad responder	intronic	ENSCAFG00000010100.4	ENSCAFG00000010100	TEX264	TEX264	chr20	37943228	37943228	G	C	0/1	27,5	0.208	32
2	bad responder	intronic	ENSCAFG00000010229.5	ENSCAFG00000010229	DOCK3	DOCK3	chr20	38367127	38367127	T	C	0/1	27,4	0.125	31
2	bad responder	intronic	ENSCAFG00000010281.4	ENSCAFG00000010281	MAPKAPK3	MAPKAPK3	chr20	38747117	38747117	A	G	0|1	28,4	0.2	32
2	bad responder	intronic	ENSCAFG00000010281.4	ENSCAFG00000010281	MAPKAPK3	MAPKAPK3	chr20	38747118	38747118	C	T	0|1	28,4	0.2	32
2	bad responder	upstream	ENSCAFG00000011489.4	ENSCAFG00000011489	AMT	AMT	chr20	39815556	39815556	T	C	0/1	16,3	0.187	19
2	bad responder	upstream	ENSCAFG00000011495.4	ENSCAFG00000011495	GPX1	GPX1	chr20	39889001	39889001	T	C	0/1	37,4	0.156	41
2	bad responder	intronic	ENSCAFG00000012975.5	ENSCAFG00000012975	MAP4	-	chr20	41031268	41031268	C	G	0/1	15,3	0.285	18
2	bad responder	upstream	ENSCAFG00000013782.3	ENSCAFG00000013782	CCRL2	CCRL2	chr20	42272142	42272142	T	A	0/1	24,13	0.353	37
2	bad responder	intergenic	ENSCAFG00000013782.3(dist=14040),ENSCAFG00000013783.2(dist=9430)	ENSCAFG00000013782	-	-	chr20	42285566	42285566	A	G	0/1	19,3	0.167	22
2	bad responder	intergenic	ENSCAFG00000044234.1(dist=52310),ENSCAFG00000013794.3(dist=17065)	ENSCAFG00000044234	-	-	chr20	42366070	42366070	C	A	0|1	17,4	0.263	21
2	bad responder	intronic	ENSCAFG00000014030.4	ENSCAFG00000014030	LARS2	LARS2	chr20	42945220	42945220	G	A	0/1	19,4	0.176	23
2	bad responder	intergenic	ENSCAFG00000046323.1(dist=70416),ENSCAFG00000014040.4(dist=76295)	ENSCAFG00000046323	-	-	chr20	43158092	43158092	C	G	0/1	35,3	0.111	38
2	bad responder	intronic	ENSCAFG00000014267.4	ENSCAFG00000014267	GATAD2A	GATAD2A	chr20	43843037	43843037	G	T	0|1	23,2	0.141	25
2	bad responder	intronic	ENSCAFG00000014291.4	ENSCAFG00000014291	MAU2	MAU2	chr20	43875930	43875930	T	A	0|1	24,3	0.156	27
2	bad responder	intronic	ENSCAFG00000015329.4,ENSCAFG00000015337.5	ENSCAFG00000015329	-	TMEM221	chr20	45357589	45357589	G	C	0|1	33,3	0.148	36
2	bad responder	intronic	ENSCAFG00000015694.4	ENSCAFG00000015694	CALR3	CALR3	chr20	46060472	46060472	T	A	0/1	17,2	0.167	19
2	bad responder	upstream	ENSCAFG00000028520.2	ENSCAFG00000028520	OR1AB2	-	chr20	46392590	46392590	-	G	0|1	38,4	0.138	42
2	bad responder	intronic	ENSCAFG00000023401.3	ENSCAFG00000023401	CYP4F22	CYP4F22	chr20	46544383	46544383	A	T	0/1	13,4	0.198	17
2	bad responder	ncRNA_exonic	ENSCAFG00000042832.1	ENSCAFG00000042832	-	-	chr20	47010962	47010962	C	A	0|1	17,2	0.199	19
2	bad responder	ncRNA_exonic	ENSCAFG00000042832.1	ENSCAFG00000042832	-	-	chr20	47010967	47010967	T	G	0|1	15,2	0.213	17
2	bad responder	intronic	ENSCAFG00000016157.4	ENSCAFG00000016157	OR1I1	OR1I1	chr20	47044777	47044777	C	G	0/1	30,3	0.137	33
2	bad responder	intergenic	ENSCAFG00000049878.1(dist=12083),ENSCAFG00000016245.4(dist=68263)	ENSCAFG00000049878	-	-	chr20	47773480	47773480	G	A	0/1	23,3	0.142	26
2	bad responder	intronic	ENSCAFG00000016897.4	ENSCAFG00000016897	CACNA1A	CACNA1A	chr20	48856784	48856784	G	A	0/1	35,3	0.111	38
2	bad responder	intergenic	ENSCAFG00000030317.2(dist=1563),ENSCAFG00000048122.1(dist=25286)	ENSCAFG00000030317	-	-	chr20	49540296	49540296	A	G	0/1	25,3	0.13	28
2	bad responder	intergenic	ENSCAFG00000032123.2(dist=31337),ENSCAFG00000017319.4(dist=41510)	ENSCAFG00000032123	-	-	chr20	49772522	49772522	T	A	0/1	38,8	0.166	46
2	bad responder	intronic	ENSCAFG00000017405.4	ENSCAFG00000017405	RGL3	-	chr20	49937076	49937076	G	C	0/1	28,3	0.166	31
2	bad responder	intergenic	ENSCAFG00000017539.5(dist=16645),ENSCAFG00000017584.5(dist=6687)	ENSCAFG00000017539	-	-	chr20	50169000	50169000	G	C	0/1	17,3	0.186	20
2	bad responder	intronic	ENSCAFG00000017715.5	ENSCAFG00000017715	SLC44A2	SLC44A2	chr20	50576251	50576251	T	G	0|1	18,3	0.167	21
2	bad responder	intronic	ENSCAFG00000017715.5	ENSCAFG00000017715	SLC44A2	SLC44A2	chr20	50576254	50576254	C	A	0|1	18,3	0.167	21
2	bad responder	intronic	ENSCAFG00000031460.1	ENSCAFG00000031460	ICAM1	ICAM1	chr20	50823822	50823822	A	T	0|1	19,3	0.2	22
2	bad responder	downstream	ENSCAFG00000042407.1	ENSCAFG00000042407	S1PR2	S1PR2	chr20	50861808	50861808	G	A	0/1	33,3	0.111	36
2	bad responder	intergenic	ENSCAFG00000048053.1(dist=14519),ENSCAFG00000041809.1(dist=9775)	ENSCAFG00000048053	-	-	chr20	51335389	51335389	A	T	0|1	18,2	0.166	20
2	bad responder	intergenic	ENSCAFG00000048064.1(dist=5666),ENSCAFG00000043244.1(dist=13459)	ENSCAFG00000048064	-	-	chr20	51535902	51535902	-	GG	0/1	24,5	0.259	29
2	bad responder	intronic	ENSCAFG00000018170.5	ENSCAFG00000018170	INSR	INSR	chr20	52066110	52066110	G	A	0|1	38,2	0.103	40
2	bad responder	intronic	ENSCAFG00000018170.5	ENSCAFG00000018170	INSR	INSR	chr20	52066113	52066113	T	C	0|1	38,2	0.103	40
2	bad responder	intergenic	ENSCAFG00000018170.5(dist=1745),ENSCAFG00000018211.5(dist=63216)	ENSCAFG00000018170	-	-	chr20	52137791	52137791	C	T	0/1	14,3	0.199	17
2	bad responder	intronic	ENSCAFG00000018211.5	ENSCAFG00000018211	-	AC008878.3	chr20	52250895	52250895	A	G	0/1	18,3	0.166	21
2	bad responder	intronic	ENSCAFG00000018316.5	ENSCAFG00000018316	EVI5L	EVI5L	chr20	52548158	52548158	C	G	0/1	26,3	0.136	29
2	bad responder	intergenic	ENSCAFG00000018353.4(dist=3161),ENSCAFG00000018482.3(dist=47628)	ENSCAFG00000018353	-	-	chr20	52781688	52781688	T	A	0|1	24,4	0.136	28
2	bad responder	intergenic	ENSCAFG00000018353.4(dist=3164),ENSCAFG00000018482.3(dist=47625)	ENSCAFG00000018353	-	-	chr20	52781691	52781691	T	A	0|1	25,4	0.136	29
2	bad responder	intergenic	ENSCAFG00000018353.4(dist=24939),ENSCAFG00000018482.3(dist=25850)	ENSCAFG00000018353	-	-	chr20	52803466	52803466	C	T	0/1	18,11	0.364	29
2	bad responder	intronic	ENSCAFG00000029570.3	ENSCAFG00000029570	KANK3	KANK3	chr20	52937353	52937353	C	T	0/1	11,14	0.5	25
2	bad responder	intronic	ENSCAFG00000019138.4	ENSCAFG00000019138	MAP2K2	AC011005.1	chr20	55469424	55469424	C	G	0/1	11,12	0.526	23
2	bad responder	ncRNA_intronic	ENSCAFG00000019385.2	ENSCAFG00000019385	GNG7	-	chr20	56598083	56598083	C	G	0/1	33,4	0.178	37
2	bad responder	intronic	ENSCAFG00000019414.5	ENSCAFG00000019414	SF3A2	SF3A2	chr20	56793017	56793017	A	G	0/1	15,3	0.2	18
2	bad responder	intronic	ENSCAFG00000019543.4	ENSCAFG00000019543	SBNO2	SBNO2	chr20	57605788	57605788	A	G	0/1	27,5	0.159	32
2	bad responder	intronic	ENSCAFG00000019552.5,ENSCAFG00000019648.4,ENSCAFG00000019652.5	ENSCAFG00000019552	ARHGAP45	ARHGAP45	chr20	57727866	57727866	C	T	0/1	18,18	0.5	36
2	bad responder	intronic	ENSCAFG00000046669.1	ENSCAFG00000046669	-	MED16	chr20	57826652	57826652	G	T	0|1	21,2	0.158	23
2	bad responder	intergenic	ENSCAFG00000004073.3(dist=277876),ENSCAFG00000004081.4(dist=61330)	ENSCAFG00000004073	-	-	chr21	4721056	4721056	A	C	0|1	18,2	0.187	20
2	bad responder	intergenic	ENSCAFG00000004073.3(dist=277879),ENSCAFG00000004081.4(dist=61327)	ENSCAFG00000004073	-	-	chr21	4721059	4721059	G	T	0|1	19,2	0.176	21
2	bad responder	intronic	ENSCAFG00000004131.4	ENSCAFG00000004131	KDM4D	KDM4D	chr21	5993762	5993762	C	G	0|1	21,3	0.19	24
2	bad responder	intergenic	ENSCAFG00000004239.5(dist=20562),ENSCAFG00000004243.4(dist=120480)	ENSCAFG00000004239	-	-	chr21	7355168	7355168	C	T	0/1	17,3	0.187	20
2	bad responder	intergenic	ENSCAFG00000047911.1(dist=54708),ENSCAFG00000046707.1(dist=24496)	ENSCAFG00000047911	-	-	chr21	7586660	7586660	G	A	0/1	14,4	0.214	18
2	bad responder	intronic	ENSCAFG00000024099.4	ENSCAFG00000024099	FAT3	FAT3	chr21	7920871	7920871	G	T	0/1	16,7	0.353	23
2	bad responder	intronic	ENSCAFG00000024099.4	ENSCAFG00000024099	FAT3	FAT3	chr21	8126436	8126436	T	A	0|1	19,2	0.167	21
2	bad responder	intergenic	ENSCAFG00000049925.1(dist=256507),ENSCAFG00000046725.1(dist=110525)	ENSCAFG00000049925	-	-	chr21	9538531	9538531	A	G	0/1	21,8	0.348	29
2	bad responder	intergenic	ENSCAFG00000049925.1(dist=309953),ENSCAFG00000046725.1(dist=57079)	ENSCAFG00000049925	-	-	chr21	9591977	9591977	T	A	0|1	23,2	0.143	25
2	bad responder	intergenic	ENSCAFG00000026324.1(dist=37970),ENSCAFG00000045832.1(dist=156905)	ENSCAFG00000026324	-	-	chr21	11866242	11866242	T	A	0|1	27,4	0.16	31
2	bad responder	intergenic	ENSCAFG00000026324.1(dist=192466),ENSCAFG00000045832.1(dist=2409)	ENSCAFG00000026324	-	-	chr21	12020738	12020738	G	T	0/1	23,3	0.211	26
2	bad responder	intronic	ENSCAFG00000004494.4	ENSCAFG00000004494	CCDC83	CCDC83	chr21	13578121	13578121	-	G	0|1	14,4	0.248	18
2	bad responder	intronic	ENSCAFG00000004494.4	ENSCAFG00000004494	CCDC83	CCDC83	chr21	13578127	13578127	C	-	0|1	15,4	0.249	19
2	bad responder	intronic	ENSCAFG00000004544.4	ENSCAFG00000004544	DLG2	DLG2	chr21	15674639	15674639	G	A	0|1	16,2	0.143	18
2	bad responder	intronic	ENSCAFG00000004628.4	ENSCAFG00000004628	PRCP	PRCP	chr21	16259490	16259490	G	C	0|1	21,4	0.173	25
2	bad responder	intergenic	ENSCAFG00000047395.1(dist=172263),ENSCAFG00000044331.1(dist=601085)	ENSCAFG00000047395	-	-	chr21	16697968	16697968	G	A	0/1	27,10	0.222	37
2	bad responder	intergenic	ENSCAFG00000047395.1(dist=280741),ENSCAFG00000044331.1(dist=492607)	ENSCAFG00000047395	-	-	chr21	16806446	16806446	A	G	0/1	14,12	0.45	26
2	bad responder	intergenic	ENSCAFG00000047395.1(dist=535464),ENSCAFG00000044331.1(dist=237884)	ENSCAFG00000047395	-	-	chr21	17061169	17061169	C	A	0/1	14,12	0.421	26
2	bad responder	intergenic	ENSCAFG00000044331.1(dist=271666),ENSCAFG00000041137.1(dist=848435)	ENSCAFG00000044331	-	-	chr21	17570844	17570844	A	G	0/1	14,3	0.214	17
2	bad responder	intergenic	ENSCAFG00000044331.1(dist=889562),ENSCAFG00000041137.1(dist=230539)	ENSCAFG00000044331	-	-	chr21	18188740	18188740	-	C	0|1	15,4	0.295	19
2	bad responder	intergenic	ENSCAFG00000044331.1(dist=889569),ENSCAFG00000041137.1(dist=230532)	ENSCAFG00000044331	-	-	chr21	18188747	18188747	G	-	0|1	17,4	0.278	21
2	bad responder	intergenic	ENSCAFG00000049460.1(dist=50643),ENSCAFG00000043854.1(dist=412829)	ENSCAFG00000049460	-	-	chr21	18818973	18818973	C	A	0/1	19,8	0.316	27
2	bad responder	intergenic	ENSCAFG00000049460.1(dist=158140),ENSCAFG00000043854.1(dist=305332)	ENSCAFG00000049460	-	-	chr21	18926470	18926470	T	G	0/1	25,12	0.333	37
2	bad responder	ncRNA_intronic	ENSCAFG00000043854.1	ENSCAFG00000043854	-	-	chr21	19277795	19277795	A	C	0/1	15,12	0.45	27
2	bad responder	ncRNA_intronic	ENSCAFG00000043854.1	ENSCAFG00000043854	-	-	chr21	19314371	19314371	A	G	0/1	26,4	0.143	30
2	bad responder	intronic	ENSCAFG00000004731.4	ENSCAFG00000004731	TENM4	TENM4	chr21	19763987	19763987	A	G	0/1	11,10	0.467	21
2	bad responder	intronic	ENSCAFG00000004731.4	ENSCAFG00000004731	TENM4	TENM4	chr21	20069045	20069045	T	C	0/1	10,11	0.471	21
2	bad responder	intergenic	ENSCAFG00000004808.4(dist=16268),ENSCAFG00000004822.4(dist=12179)	ENSCAFG00000004808	-	-	chr21	20690852	20690852	G	C	0/1	30,3	0.153	33
2	bad responder	upstream	ENSCAFG00000004848.4	ENSCAFG00000004848	KCTD14	KCTD14	chr21	20794493	20794493	T	C	0/1	22,4	0.142	26
2	bad responder	intronic	ENSCAFG00000005074.5	ENSCAFG00000005074	MYO7A	MYO7A	chr21	21607975	21607975	T	A	0/1	34,5	0.133	39
2	bad responder	intronic	ENSCAFG00000005192.3	ENSCAFG00000005192	ACER3	ACER3	chr21	21788533	21788533	A	G	0/1	25,4	0.143	29
2	bad responder	exonic	ENSCAFG00000005274.3	ENSCAFG00000005274	THAP12	-	chr21	22314619	22314619	G	A	0/1	17,4	0.167	21
2	bad responder	intronic	ENSCAFG00000005395.5	ENSCAFG00000005395	GDPD5	GDPD5	chr21	23139287	23139287	T	A	0/1	33,5	0.23	38
2	bad responder	intergenic	ENSCAFG00000005437.4(dist=7983),ENSCAFG00000032663.2(dist=3151)	ENSCAFG00000005437	-	-	chr21	23481814	23481814	C	T	0/1	19,3	0.176	22
2	bad responder	intronic	ENSCAFG00000005539.5	ENSCAFG00000005539	PPME1	PPME1	chr21	24125626	24125626	T	C	0/1	28,3	0.13	31
2	bad responder	exonic	ENSCAFG00000005549.5	ENSCAFG00000005549	C2CD3	C2CD3	chr21	24132065	24132065	A	G	0/1	29,7	0.249	36
2	bad responder	intergenic	ENSCAFG00000005594.4(dist=7889),ENSCAFG00000046179.1(dist=97319)	ENSCAFG00000005594	-	-	chr21	24615924	24615924	C	A	0|1	29,4	0.167	33
2	bad responder	intergenic	ENSCAFG00000005594.4(dist=16550),ENSCAFG00000046179.1(dist=88658)	ENSCAFG00000005594	-	-	chr21	24624585	24624585	A	C	0|1	23,3	0.143	26
2	bad responder	intergenic	ENSCAFG00000005594.4(dist=16557),ENSCAFG00000046179.1(dist=88651)	ENSCAFG00000005594	-	-	chr21	24624592	24624592	G	T	0|1	24,3	0.136	27
2	bad responder	intergenic	ENSCAFG00000045451.1(dist=6823),ENSCAFG00000050044.1(dist=10503)	ENSCAFG00000045451	-	-	chr21	27976730	27976730	A	C	0|1	25,3	0.16	28
2	bad responder	intergenic	ENSCAFG00000045451.1(dist=6828),ENSCAFG00000050044.1(dist=10498)	ENSCAFG00000045451	-	-	chr21	27976735	27976735	G	T	0|1	24,3	0.167	27
2	bad responder	intronic	ENSCAFG00000049153.1	ENSCAFG00000049153	-	-	chr21	28495867	28495867	G	T	0|1	23,3	0.15	26
2	bad responder	downstream	ENSCAFG00000029434.2	ENSCAFG00000029434	TIMM10B	AC084337.2	chr21	29799623	29799623	G	A	0|1	15,2	0.143	17
2	bad responder	intronic	ENSCAFG00000045931.1	ENSCAFG00000045931	-	DNHD1	chr21	29813081	29813081	A	C	0/1	17,5	0.21	22
2	bad responder	intergenic	ENSCAFG00000041852.1(dist=14970),ENSCAFG00000041797.1(dist=30782)	ENSCAFG00000041852	-	-	chr21	30362914	30362914	G	T	0/1	18,7	0.277	25
2	bad responder	intronic	ENSCAFG00000006707.4	ENSCAFG00000006707	ZNF215	-	chr21	30621896	30621896	A	G	0/1	49,10	0.179	59
2	bad responder	intronic	ENSCAFG00000006707.4	ENSCAFG00000006707	ZNF215	-	chr21	30635458	30635458	C	T	0/1	47,9	0.19	56
2	bad responder	intergenic	ENSCAFG00000041674.1(dist=3136),ENSCAFG00000045955.1(dist=15479)	ENSCAFG00000041674	-	-	chr21	31476780	31476780	C	T	0/1	32,5	0.153	37
2	bad responder	intergenic	ENSCAFG00000006884.4(dist=3702),ENSCAFG00000006892.6(dist=36784)	ENSCAFG00000006884	-	-	chr21	31529346	31529346	G	C	0|1	31,3	0.159	34
2	bad responder	intronic	ENSCAFG00000006892.6	ENSCAFG00000006892	TUB	TUB	chr21	31582512	31582512	-	C	0|1	14,5	0.286	19
2	bad responder	intronic	ENSCAFG00000006892.6	ENSCAFG00000006892	TUB	TUB	chr21	31582520	31582520	G	-	0|1	14,5	0.286	19
2	bad responder	intronic	ENSCAFG00000007609.4	ENSCAFG00000007609	IRAG1	IRAG1	chr21	33831496	33831496	A	T	0|1	22,4	0.199	26
2	bad responder	intronic	ENSCAFG00000007609.4	ENSCAFG00000007609	IRAG1	IRAG1	chr21	33831497	33831497	A	T	0|1	22,4	0.2	26
2	bad responder	intronic	ENSCAFG00000007638.4	ENSCAFG00000007638	CTR9	CTR9	chr21	33922336	33922336	T	A	0/1	19,3	0.173	22
2	bad responder	intronic	ENSCAFG00000007691.4	ENSCAFG00000007691	GALNT18	GALNT18	chr21	34668407	34668407	G	C	0/1	38,3	0.125	41
2	bad responder	intronic	ENSCAFG00000007845.6	ENSCAFG00000007845	DKK3	DKK3	chr21	35055406	35055406	G	T	0|1	20,2	0.158	22
2	bad responder	intronic	ENSCAFG00000007845.6	ENSCAFG00000007845	DKK3	DKK3	chr21	35073232	35073232	A	C	0/1	15,18	0.538	33
2	bad responder	intergenic	ENSCAFG00000022021.1(dist=10339),ENSCAFG00000007867.5(dist=34964)	ENSCAFG00000022021	-	-	chr21	35119458	35119458	T	G	0|1	31,3	0.111	34
2	bad responder	intronic	ENSCAFG00000007895.5	ENSCAFG00000007895	PARVA	PARVA	chr21	35470888	35470888	C	G	0|1	22,3	0.158	25
2	bad responder	intronic	ENSCAFG00000007976.5	ENSCAFG00000007976	TEAD1	TEAD1	chr21	35659228	35659228	C	G	0|1	35,3	0.125	38
2	bad responder	intronic	ENSCAFG00000007976.5	ENSCAFG00000007976	TEAD1	TEAD1	chr21	35659231	35659231	C	G	0|1	35,3	0.125	38
2	bad responder	intronic	ENSCAFG00000007976.5	ENSCAFG00000007976	TEAD1	TEAD1	chr21	35852106	35852106	C	T	0/1	7,12	0.648	19
2	bad responder	intergenic	ENSCAFG00000018701.4(dist=20264),ENSCAFG00000008245.4(dist=55396)	ENSCAFG00000018701	-	-	chr21	36465572	36465572	G	C	0/1	23,5	0.227	28
2	bad responder	intronic	ENSCAFG00000008607.4	ENSCAFG00000008607	SOX6	SOX6	chr21	38987022	38987022	T	C	0/1	12,3	0.231	15
2	bad responder	intergenic	ENSCAFG00000009391.5(dist=1692),ENSCAFG00000009402.4(dist=56832)	ENSCAFG00000009391	-	-	chr21	41138398	41138398	C	A	0|1	50,4	0.121	54
2	bad responder	intronic	ENSCAFG00000009777.6	ENSCAFG00000009777	NAV2	NAV2	chr21	42076012	42076012	G	A	0/1	20,4	0.166	24
2	bad responder	intergenic	ENSCAFG00000009813.5(dist=34795),ENSCAFG00000048597.1(dist=5758)	ENSCAFG00000009813	-	-	chr21	42247210	42247210	G	A	0/1	21,2	0.118	23
2	bad responder	intergenic	ENSCAFG00000009813.5(dist=39294),ENSCAFG00000048597.1(dist=1259)	ENSCAFG00000009813	-	-	chr21	42251709	42251709	-	G	0|1	19,4	0.175	23
2	bad responder	intergenic	ENSCAFG00000009813.5(dist=39301),ENSCAFG00000048597.1(dist=1252)	ENSCAFG00000009813	-	-	chr21	42251716	42251716	C	-	0|1	22,4	0.157	26
2	bad responder	intronic	ENSCAFG00000009933.4	ENSCAFG00000009933	NELL1	NELL1	chr21	42699183	42699183	C	T	0/1	13,13	0.471	26
2	bad responder	intronic	ENSCAFG00000009933.4	ENSCAFG00000009933	NELL1	NELL1	chr21	42996796	42996796	A	G	0/1	23,4	0.141	27
2	bad responder	intronic	ENSCAFG00000010093.4	ENSCAFG00000010093	SLC17A6	SLC17A6	chr21	44023488	44023488	T	C	0/1	20,2	0.156	22
2	bad responder	upstream	ENSCAFG00000029498.2	ENSCAFG00000029498	FANCF	FANCF	chr21	44257510	44257510	C	G	0/1	19,2	0.133	21
2	bad responder	ncRNA_intronic	ENSCAFG00000037544.2	ENSCAFG00000037544	-	-	chr21	45297634	45297634	C	T	0/1	22,6	0.227	28
2	bad responder	intergenic	ENSCAFG00000045183.1(dist=71382),ENSCAFG00000010135.4(dist=170836)	ENSCAFG00000045183	-	-	chr21	45630153	45630153	C	T	0/1	11,8	0.467	19
2	bad responder	upstream	ENSCAFG00000001197.3	ENSCAFG00000001197	-	-	chr21	46227172	46227172	A	T	0/1	12,16	0.591	28
2	bad responder	intergenic	ENSCAFG00000037081.2(dist=120892),ENSCAFG00000045224.1(dist=60605)	ENSCAFG00000037081	-	-	chr21	46534878	46534878	A	G	0/1	17,3	0.175	20
2	bad responder	intergenic	ENSCAFG00000026973.2(dist=191586),ENSCAFG00000010152.4(dist=82522)	ENSCAFG00000026973	-	-	chr21	46963456	46963456	A	T	0/1	11,12	0.529	23
2	bad responder	intergenic	ENSCAFG00000030468.1(dist=25622),ENSCAFG00000042991.1(dist=73863)	ENSCAFG00000030468	-	-	chr21	47498924	47498924	G	C	0|1	19,3	0.158	22
2	bad responder	intergenic	ENSCAFG00000010174.4(dist=116077),ENSCAFG00000010196.5(dist=42418)	ENSCAFG00000010174	-	-	chr21	47882580	47882580	T	C	0/1	25,10	0.25	35
2	bad responder	intergenic	ENSCAFG00000010174.4(dist=149280),ENSCAFG00000010196.5(dist=9215)	ENSCAFG00000010174	-	-	chr21	47915783	47915783	C	A	0/1	21,4	0.222	25
2	bad responder	intergenic	ENSCAFG00000048732.1(dist=13655),ENSCAFG00000039434.2(dist=97846)	ENSCAFG00000048732	-	-	chr21	48085084	48085084	C	A	0|1	22,3	0.19	25
2	bad responder	ncRNA_intronic	ENSCAFG00000044515.1	ENSCAFG00000044515	-	-	chr21	48812877	48812877	T	C	0/1	29,3	0.173	32
2	bad responder	ncRNA_intronic	ENSCAFG00000037913.2	ENSCAFG00000037913	-	-	chr21	49598303	49598303	C	T	0|1	26,5	0.25	31
2	bad responder	ncRNA_intronic	ENSCAFG00000037913.2	ENSCAFG00000037913	-	-	chr21	49598306	49598306	T	A	0|1	26,5	0.25	31
2	bad responder	intergenic	ENSCAFG00000027102.2(dist=57329),ENSCAFG00000010276.4(dist=290980)	ENSCAFG00000027102	-	-	chr21	49824526	49824526	T	C	0/1	30,4	0.124	34
2	bad responder	intergenic	ENSCAFG00000027102.2(dist=129027),ENSCAFG00000010276.4(dist=219282)	ENSCAFG00000027102	-	-	chr21	49896224	49896224	G	A	0/1	25,4	0.149	29
2	bad responder	intergenic	ENSCAFG00000027102.2(dist=321453),ENSCAFG00000010276.4(dist=26856)	ENSCAFG00000027102	-	-	chr21	50088650	50088650	C	G	0|1	11,3	0.214	14
2	bad responder	intergenic	ENSCAFG00000010365.4(dist=13398),ENSCAFG00000010370.5(dist=12579)	ENSCAFG00000010365	-	-	chr21	50627832	50627832	C	G	0|1	22,3	0.15	25
2	bad responder	intergenic	ENSCAFG00000010365.4(dist=13403),ENSCAFG00000010370.5(dist=12574)	ENSCAFG00000010365	-	-	chr21	50627837	50627837	C	G	0|1	23,3	0.143	26
2	bad responder	intronic	ENSCAFG00000010370.5	ENSCAFG00000010370	MS4A7	MS4A7	chr21	50646625	50646625	A	G	0/1	20,4	0.167	24
2	bad responder	intronic	ENSCAFG00000045539.1	ENSCAFG00000045539	-	MS4A5	chr21	50672019	50672019	C	T	0/1	12,11	0.444	23
2	bad responder	intergenic	ENSCAFG00000010381.4(dist=16842),ENSCAFG00000048238.1(dist=1385)	ENSCAFG00000010381	-	-	chr21	50750546	50750546	A	G	0|1	17,4	0.222	21
2	bad responder	intergenic	ENSCAFG00000010381.4(dist=16843),ENSCAFG00000048238.1(dist=1384)	ENSCAFG00000010381	-	-	chr21	50750547	50750547	C	T	0|1	17,4	0.222	21
2	bad responder	intronic	ENSCAFG00000004261.4	ENSCAFG00000004261	ATP7B	ATP7B	chr22	215382	215382	G	A	0|1	11,3	0.231	14
2	bad responder	intronic	ENSCAFG00000004261.4	ENSCAFG00000004261	ATP7B	ATP7B	chr22	215391	215391	T	C	0|1	12,3	0.214	15
2	bad responder	intergenic	ENSCAFG00000028728.3(dist=48777),ENSCAFG00000004287.4(dist=16351)	ENSCAFG00000028728	-	-	chr22	712472	712472	A	G	0/1	21,4	0.156	25
2	bad responder	intergenic	ENSCAFG00000049922.1(dist=30233),ENSCAFG00000046176.1(dist=93429)	ENSCAFG00000049922	-	-	chr22	1168928	1168928	T	A	0|1	28,4	0.16	32
2	bad responder	intergenic	ENSCAFG00000049922.1(dist=30236),ENSCAFG00000046176.1(dist=93426)	ENSCAFG00000049922	-	-	chr22	1168931	1168931	T	A	0|1	27,4	0.16	31
2	bad responder	intronic	ENSCAFG00000004436.5	ENSCAFG00000004436	RB1	RB1	chr22	3183214	3183214	A	G	0/1	27,3	0.124	30
2	bad responder	intergenic	ENSCAFG00000046620.1(dist=28371),ENSCAFG00000028152.2(dist=124680)	ENSCAFG00000046620	-	-	chr22	3975100	3975100	C	A	0|1	16,3	0.235	19
2	bad responder	intergenic	ENSCAFG00000046620.1(dist=28372),ENSCAFG00000028152.2(dist=124679)	ENSCAFG00000046620	-	-	chr22	3975101	3975101	T	G	0|1	16,3	0.235	19
2	bad responder	intronic	ENSCAFG00000004514.5	ENSCAFG00000004514	SIAH3	SIAH3	chr22	5367020	5367020	T	A	0/1	20,3	0.199	23
2	bad responder	intergenic	ENSCAFG00000028157.1(dist=1914),ENSCAFG00000026451.1(dist=34951)	ENSCAFG00000028157	-	-	chr22	5717728	5717728	T	G	0|1	25,2	0.094	27
2	bad responder	intergenic	ENSCAFG00000028157.1(dist=1915),ENSCAFG00000026451.1(dist=34950)	ENSCAFG00000028157	-	-	chr22	5717729	5717729	C	A	0|1	25,2	0.094	27
2	bad responder	intergenic	ENSCAFG00000004584.6(dist=12772),ENSCAFG00000004600.3(dist=21606)	ENSCAFG00000004584	-	-	chr22	6518444	6518444	G	C	0|1	36,4	0.103	40
2	bad responder	intergenic	ENSCAFG00000041517.1(dist=3794),ENSCAFG00000037061.2(dist=75698)	ENSCAFG00000041517	-	-	chr22	6592508	6592508	G	A	0/1	26,13	0.286	39
2	bad responder	intergenic	ENSCAFG00000045623.1(dist=105592),ENSCAFG00000004602.4(dist=116537)	ENSCAFG00000045623	-	-	chr22	6863283	6863283	A	C	0/1	21,5	0.237	26
2	bad responder	intergenic	ENSCAFG00000044274.1(dist=76722),ENSCAFG00000004675.5(dist=42534)	ENSCAFG00000044274	-	-	chr22	8185021	8185021	C	A	0/1	23,4	0.149	27
2	bad responder	intronic	ENSCAFG00000004677.4	ENSCAFG00000004677	AKAP11	AKAP11	chr22	8495966	8495966	T	A	0/1	14,12	0.409	26
2	bad responder	intronic	ENSCAFG00000004733.4	ENSCAFG00000004733	DGKH	DGKH	chr22	8655662	8655662	C	G	0|1	23,4	0.227	27
2	bad responder	downstream	ENSCAFG00000044394.1	ENSCAFG00000044394	-	-	chr22	8777089	8777089	G	A	0/1	14,16	0.504	30
2	bad responder	intronic	ENSCAFG00000004764.4	ENSCAFG00000004764	VWA8	VWA8	chr22	8876549	8876549	C	G	0/1	22,5	0.227	27
2	bad responder	intronic	ENSCAFG00000004843.5	ENSCAFG00000004843	OLFM4	OLFM4	chr22	10035210	10035210	G	T	0/1	18,14	0.416	32
2	bad responder	intergenic	ENSCAFG00000004843.5(dist=7331),ENSCAFG00000048415.1(dist=13890)	ENSCAFG00000004843	-	-	chr22	10082053	10082053	A	T	0/1	19,4	0.175	23
2	bad responder	intergenic	ENSCAFG00000024745.3(dist=102857),ENSCAFG00000044555.1(dist=10884)	ENSCAFG00000024745	-	-	chr22	10316095	10316095	T	A	0/1	33,3	0.147	36
2	bad responder	intergenic	ENSCAFG00000044555.1(dist=118023),ENSCAFG00000021822.1(dist=11911)	ENSCAFG00000044555	-	-	chr22	10450957	10450957	C	-	0/1	21,3	0.158	24
2	bad responder	intergenic	ENSCAFG00000045070.1(dist=75008),ENSCAFG00000026317.1(dist=183375)	ENSCAFG00000045070	-	-	chr22	11074308	11074308	T	G	0|1	24,4	0.182	28
2	bad responder	intergenic	ENSCAFG00000045070.1(dist=75013),ENSCAFG00000026317.1(dist=183370)	ENSCAFG00000045070	-	-	chr22	11074313	11074313	C	A	0|1	22,4	0.19	26
2	bad responder	intergenic	ENSCAFG00000045070.1(dist=92342),ENSCAFG00000026317.1(dist=166041)	ENSCAFG00000045070	-	-	chr22	11091642	11091642	G	A	0|1	35,4	0.148	39
2	bad responder	intergenic	ENSCAFG00000045070.1(dist=92345),ENSCAFG00000026317.1(dist=166038)	ENSCAFG00000045070	-	-	chr22	11091645	11091645	T	C	0|1	35,4	0.148	39
2	bad responder	intergenic	ENSCAFG00000045070.1(dist=187608),ENSCAFG00000026317.1(dist=70775)	ENSCAFG00000045070	-	-	chr22	11186908	11186908	C	G	0/1	6,8	0.545	14
[truncated: 100,367 more rows]
