# Supplementary material for: The genomic landscape of canine diffuse large B-cell lymphoma identifies distinct subtypes with clinical and therapeutic implications
Source: Research Square preprint supplement (doi:10.21203/rs.3.rs-916612/v1), 2021-09-21
Supplement: Supplementary file 9 [file ab8b24659ba078bd3b911e39.xlsx]

## Sheet: Foglio1
Supplementary Data 12: Clinical details for the 56 dogs with DLBCL included in TP53 mutational analysis.
# Sample ID	BREED	BREED (Pure/Mixed)	AGE (years)	AGE (Young <10/Old ≥10)	SEX	WEIGHT (kg)	WEIGHT (Over ≥10/Under <10kg)	STAGE	SUBSTAGE	BM infiltration (%)	BM infiltration (yes/no)	BLOOD infiltration (%)	LDH	PRETREATMENT WITH STEROIDS	TREATMENT	TTP	LSS
78	rottweiler	pure	4	young	f	38	over	3	a	0.9	no	0.9	normal	no	CH-IM	217	298
79	chowchow	pure	5	young	m	34	over	5	a	2.6	no	2.4	increased	yes	CH-IM	251	623
80	dobermann	pure	10	old	f	33	over	4	a	0.9	no	0.9	increased	no	CH-IM	53	96
81	dobermann	pure	5	young	f	32	over	5	b	5.3	yes	3.7	increased	yes	CH-IM	55	130
82	german shepherd	pure	11	old	m	32	over	4	a	0.9	no	0.9	increased	yes	CH-IM	49	82
83	golden retriever	pure	10	old	m	33	over	4	b	0.9	no	0.9	increased	yes	CH-IM	122	211
84	cocker	pure	13	old	f	17	over	5	a	5.9	yes	1.8	increased	yes	CH-IM	60	89
85	dobermann	pure	10	old	f	37	over	4	a	0.9	no	0.9	increased	no	CH-IM	290	291
86	pitbull	pure	6	young	f	26	over	5	a	5.7	yes	25	increased	no	CH-IM	197	361
87	english setter	pure	13	old	f	20	over	5	a	1.7	no	6	increased	no	CH-IM	275	413
88	mixed	mixed	4	young	m	19	over	5	a	6.6	yes	24.4	increased	no	CH-IM	250	480
89	mixed	mixed	14	old	f	13	over	4	a	0.9	no	0.9	increased	no	CH-IM	341	361
90	mixed	mixed	11	old	f	18	over	5	a	1.1	no	1.5	increased	no	CH-IM	346	352
91	beagle	pure	11	old	f	12	over	5	b	1.5	no	0.9	increased	no	CH-IM	332	625
92	chowchow	pure	10	old	f	34	over	4	a	0.9	no	0.9	normal	no	CH-IM	449	450
93	bull terrier	pure	4	young	f	25	over	5	b	1.4	no	0.9	increased	yes	CH-IM	187	196
94	finnish hound	pure	10	old	m	15	over	5	b	2.7	no	5.9	increased	no	CH-IM	57	119
95	mixed	mixed	11	old	m	15	over	4	a	0.9	no	0.9	normal	yes	CH-IM	51	69
96	bulldog	pure	4	young	f	24	over	5	a	11.2	yes	39	increased	no	CH-IM	162	311
97	bernese mountain	pure	7	young	f	39	over	5	a	5.1	yes	2.4	increased	no	CH-IM	40	100
98	mixed	mixed	9	young	m	26	over	5	b	1.2	no	2.3	increased	no	CH-IM	194	248
99	golden retriever	pure	11	old	f	35.8	over	4	a	0.9	no	0.9	increased	no	CH-IM	72	133
100	corso	pure	7	young	m	54.9	over	5	b	83.8	yes	6.5	increased	no	CH-IM	52	54
101	bernese mountain	pure	10	old	m	46	over	5	a	6.6	yes	6.5	normal	no	CH-IM	383	383
102	mixed	mixed	11	old	m	23.3	over	5	a	1.2	no	1.4	normal	no	CH-IM	31	296
103	mixed	mixed	10	old	m	6.9	under	3	a	0.9	no	0.9	normal	yes	CH-IM	202	388
104	german shepherd	pure	9	young	f	27	over	5	b	2.8	no	1.2	normal	no	CH-IM	171	188
105	mixed	mixed	12	old	m	9.1	under	4	a	0.9	no	0.9	increased	yes	CH-IM	35	63
106	rottweiler	pure	7	young	m	47.8	over	5	b	5	yes	3	increased	no	CH-IM	202	280
107	italian hound	pure	5	young	m	17.8	over	5	b	27.5	yes	55.5	increased	yes	CH-IM	250	669
108	bassethound	pure	7	young	m	31.1	over	5	b	18.8	yes	5.1	normal	no	CH-IM	237	238
109	poodle	pure	7	young	m	13.5	over	5	a	0.9	no	4.8	increased	no	CH-IM	249	399
110	mixed	mixed	9	young	m	36	over	4	a	0.9	no	0.9	normal	yes	CH-IM	123	156
111	mixed	mixed	15	old	f	17.1	over	5	a	16.54	yes	5.26	increased	yes	CH-IM	140	141
112	rottweiler	pure	5	young	m	44.4	over	5	a	2	no	4	increased	no	CH-IM	239	354
113	shih-tzu	pure	5	young	m	8.8	under	5	a	15.5	yes	15.4	increased	no	CH-IM	29	152
114	beagle	pure	5	young	m	18.5	over	5	a	1.6	no	3.2	normal	no	CH-IM	453	1321
115	french bulldog	pure	5	young	f	12	over	5	b	51.6	yes	50.7	normal	yes	CH-IM	134	215
116	golden retriever	pure	4	young	m	32.8	over	5	a	1.9	no	8.9	normal	no	CH-IM	213	385
117	mixed	mixed	6	young	f	26.6	over	5	a	1	no	1.9	normal	no	CH-IM	178	680
118	german shepherd	pure	8	young	f	38	over	5	a	7.7	yes	25	increased	no	CH-IM	92	93
119	mixed	mixed	5	young	f	28	over	5	b	22.7	yes	2.4	normal	no	CH-IM	157	188
120	mixed	mixed	9	young	m	27.5	over	5	a	3	yes	16	normal	yes	CH-IM	357	560
121	mixed	mixed	4	young	m	14.1	over	5	b	3.7	yes	1.3	increased	yes	CH-IM	133	331
122	akita inu	pure	9	young	m	41.2	over	5	b	6.2	yes	28.6	normal	no	CH-IM	420	939
123	mixed	mixed	9	young	f	10.5	over	4	a	0.9	no	0.9	increased	no	CH-IM	720	1400
124	labrador	pure	3	young	m	38	over	5	b	9.2	yes	32.2	increased	yes	CH-IM	43	172
125	mixed	mixed	13	old	f	23.8	over	4	b	2.3	no	0.9	increased	no	CH-IM	80	105
126	french bulldog	pure	8	young	m	12.7	over	5	a	0.9	no	11.1	increased	no	CH-IM	259	863
127	golden retriever	pure	8	young	f	27.4	over	5	a	2.2	no	8.1	normal	no	CH-IM	284	832
128	mixed	mixed	11	old	f	10.4	over	5	a	16	yes	13	normal	no	CH-IM	290	713
129	dobermann	pure	3	young	f	38.5	over	5	a	1.2	no	4.8	normal	no	CH-IM	235	364
130	cocker	pure	12	old	f	16.2	over	4	a	2	no	1.2	normal	no	CH-IM	168	195
131	mixed	mixed	13	old	f	8.1	under	5	a	9.1	yes	12.7	normal	no	CH-IM	293	294
132	rottweiler	pure	5	young	f	43.3	over	5	a	8	yes	51.4	increased	no	CH-IM	289	775
133	belgian shepherd	pure	10	old	m	39.4	over	5	b	1.5	no	3.4	normal	no	CH-IM	224	225
BM: bone marrow; TTP: time to progression; LSS: lymphoma specific survival
