# Supplementary material for: The genomic landscape of canine diffuse large B-cell lymphoma identifies distinct subtypes with clinical and therapeutic implications
Source: Research Square preprint supplement (doi:10.21203/rs.3.rs-916612/v1), 2021-09-21
Supplement: Supplementary file 10 [file d8010f9ad1cf19bd1051fdb9.xlsx]

## Sheet: Exonic somatic variants
Supplementary Data 3: Somatic mutations identified by WES in 77 cDLBCLs.
# Sample ID	Consequence	Annotation	Ensembl gene ID	Dog gene name	Human gene name	Chromosome	Start	Stop	REF	ALT	SIFT	Genotype	REF allele depth, ALT allele depth	ALT allele frequency	Depth
1	nonsynonymous SNV	ENSCAFG00000002032.4:ENSCAFT00000003213.4:exon2:c.G634A:p.A212T,	ENSCAFG00000002032	KCNV2	KCNV2	chr1	91339052	91339052	G	A	tolerated(0.08)	0/1	19,20	0.527	39
1	nonsynonymous SNV	ENSCAFG00000044439.1:ENSCAFT00000084706.1:exon2:c.G790T:p.A264S,	ENSCAFG00000044439	OR6Z3	-	chr1	101284483	101284483	G	T	tolerated(1)	0/1	49,44	0.446	93
1	synonymous SNV	ENSCAFG00000003836.4:ENSCAFT00000044987.2:exon1:c.C36T:p.C12C,	ENSCAFG00000003836	KCNA7	KCNA7	chr1	107367770	107367770	C	T	-	0|1	3,2	0.4	5
1	nonsynonymous SNV	ENSCAFG00000003836.4:ENSCAFT00000044987.2:exon1:c.T44A:p.L15Q,	ENSCAFG00000003836	KCNA7	KCNA7	chr1	107367778	107367778	T	A	deleterious(0)	0|1	3,2	0.4	5
1	nonsynonymous SNV	ENSCAFG00000000907.3:ENSCAFT00000001404.3:exon18:c.G2381A:p.S794N,	ENSCAFG00000000907	SCUBE1	SCUBE1	chr10	22347789	22347789	G	A	deleterious(0)	0/1	58,5	0.093	63
1	nonsynonymous SNV	ENSCAFG00000023613.5:ENSCAFT00000073093.1:exon6:c.G274A:p.A92T,ENSCAFG00000023613.5:ENSCAFT00000036413.4:exon7:c.G799A:p.A267T,ENSCAFG00000023613.5:ENSCAFT00000044446.3:exon8:c.G847A:p.A283T,	ENSCAFG00000023613	ANKRD54	ANKRD54	chr10	26805022	26805022	G	A	tolerated(0.06)	0/1	29,6	0.159	35
1	synonymous SNV	ENSCAFG00000002096.4:ENSCAFT00000003315.4:exon5:c.C234G:p.T78T,ENSCAFG00000002096.4:ENSCAFT00000080991.1:exon4:c.C318G:p.T106T,ENSCAFG00000002096.4:ENSCAFT00000073528.1:exon4:c.C318G:p.T106T,	ENSCAFG00000002096	UXS1	UXS1	chr10	37361698	37361698	C	G	-	0/1	48,24	0.355	72
1	synonymous SNV	ENSCAFG00000031079.2:ENSCAFT00000048010.2:exon1:c.G51A:p.K17K,	ENSCAFG00000031079	ZFP36L2	ZFP36L2	chr10	45750904	45750904	C	T	-	0/1	20,4	0.221	24
1	nonsynonymous SNV	ENSCAFG00000003262.4:ENSCAFT00000005232.4:exon10:c.C1370A:p.P457H,	ENSCAFG00000003262	APLF	APLF	chr10	67521291	67521291	C	A	deleterious(0)	0/1	14,4	0.2	18
1	nonsynonymous SNV	ENSCAFG00000000192.4:ENSCAFT00000000309.4:exon18:c.C2681T:p.S894L,ENSCAFG00000000192.4:ENSCAFT00000068517.1:exon17:c.C2516T:p.S839L,ENSCAFG00000000192.4:ENSCAFT00000073393.1:exon19:c.C2732T:p.S911L,	ENSCAFG00000000192	SEMA6A	SEMA6A	chr11	6120419	6120419	G	A	deleterious(0)	0/1	56,32	0.407	88
1	synonymous SNV	ENSCAFG00000030599.2:ENSCAFT00000045708.2:exon3:c.G342A:p.T114T,	ENSCAFG00000030599	NFKBIL1	NFKBIL1	chr12	1056297	1056297	G	A	-	0/1	18,4	0.199	22
1	nonsynonymous SNV	ENSCAFG00000000674.3:ENSCAFT00000001042.3:exon1:c.C902T:p.A301V,	ENSCAFG00000000674	ZBTB12	ZBTB12	chr12	1357301	1357301	G	A	tolerated(0.46)	0/1	15,3	0.186	18
1	nonsynonymous SNV	ENSCAFG00000001753.4:ENSCAFT00000002747.4:exon9:c.G1208A:p.R403H,	ENSCAFG00000001753	PPP2R5D	PPP2R5D	chr12	11537141	11537141	G	A	deleterious(0.02)	0/1	22,4	0.142	26
1	synonymous SNV	ENSCAFG00000001250.4:ENSCAFT00000001944.4:exon2:c.G267A:p.R89R,	ENSCAFG00000001250	MROH5	MROH5	chr13	35948047	35948047	C	T	-	0/1	30,54	0.636	84
1	nonsynonymous SNV	ENSCAFG00000002069.4:ENSCAFT00000031580.4:exon31:c.A1769G:p.E590G,	ENSCAFG00000002069	COL1A2	COL1A2	chr14	19905403	19905403	A	G	deleterious(0)	0/1	26,4	0.143	30
1	nonsynonymous SNV	ENSCAFG00000002717.5:ENSCAFT00000004311.4:exon72:c.A11656G:p.I3886V,	ENSCAFG00000002717	DNAH11	DNAH11	chr14	35750538	35750538	A	G	tolerated(0.13)	0/1	22,3	0.143	25
1	nonsynonymous SNV	ENSCAFG00000005177.4:ENSCAFT00000008368.4:exon2:c.G379C:p.V127L,ENSCAFG00000005177.4:ENSCAFT00000080413.1:exon2:c.G379C:p.V127L,	ENSCAFG00000005177	HYI	HYI	chr15	16726818	16726818	G	C	tolerated(1)	0/1	7,15	0.611	22
1	nonsynonymous SNV	ENSCAFG00000030403.2:ENSCAFT00000044772.2:exon1:c.C103A:p.R35S,	ENSCAFG00000030403	LRAT	LRAT	chr15	52400234	52400234	C	A	deleterious_low_confidence(0)	0/1	11,3	0.273	14
1	nonsynonymous SNV	ENSCAFG00000003650.3:ENSCAFT00000005870.3:exon1:c.G589A:p.D197N,	ENSCAFG00000003650	OR6W1	-	chr16	6559455	6559455	G	A	tolerated(0.22)	0/1	66,70	0.52	136
1	synonymous SNV	ENSCAFG00000003152.5:ENSCAFT00000005069.5:exon4:c.C303T:p.C101C,	ENSCAFG00000003152	ZNF672	-	chr16	13743460	13743460	C	T	-	0/1	23,4	0.136	27
1	nonsynonymous SNV	ENSCAFG00000004548.4:ENSCAFT00000007319.4:exon1:c.G3197A:p.S1066N,	ENSCAFG00000004548	-	ZBED6CL	chr16	14664365	14664365	G	A	tolerated(0.12)	0/1	56,4	0.065	60
1	nonsynonymous SNV	ENSCAFG00000006252.4:ENSCAFT00000086493.1:exon10:c.C1106T:p.T369M,ENSCAFG00000006252.4:ENSCAFT00000082106.1:exon7:c.C989T:p.T330M,ENSCAFG00000006252.4:ENSCAFT00000074189.1:exon11:c.C1121T:p.T374M,ENSCAFG00000006252.4:ENSCAFT00000081637.1:exon10:c.C953T:p.T318M,ENSCAFG00000006252.4:ENSCAFT00000083430.1:exon9:c.C1322T:p.T441M,ENSCAFG00000006252.4:ENSCAFT00000010155.4:exon11:c.C1328T:p.T443M,	ENSCAFG00000006252	UNC5D	UNC5D	chr16	29271248	29271248	G	A	deleterious(0)	0/1	42,26	0.383	68
1	nonsynonymous SNV	ENSCAFG00000003217.4:ENSCAFT00000005172.4:exon7:c.C877T:p.P293S,	ENSCAFG00000003217	TPO	TPO	chr17	795006	795006	C	T	tolerated(1)	0/1	2,6	0.667	8
1	synonymous SNV	ENSCAFG00000023592.4:ENSCAFT00000063291.1:exon8:c.A2805G:p.K935K,ENSCAFG00000023592.4:ENSCAFT00000036362.4:exon10:c.A2898G:p.K966K,ENSCAFG00000023592.4:ENSCAFT00000036363.3:exon10:c.A2889G:p.K963K,ENSCAFG00000023592.4:ENSCAFT00000010451.5:exon11:c.A2913G:p.K971K,	ENSCAFG00000023592	SLC8A1	SLC8A1	chr17	32007306	32007306	T	C	-	0/1	49,4	0.075	53
1	nonsynonymous SNV	ENSCAFG00000007040.4:ENSCAFT00000011298.4:exon5:c.A500G:p.K167R,	ENSCAFG00000007040	MRPS5	MRPS5	chr17	34936906	34936906	A	G	tolerated(0.26)	0/1	62,5	0.082	67
1	nonsynonymous SNV	ENSCAFG00000007200.4:ENSCAFT00000011572.4:exon6:c.A872G:p.K291R,ENSCAFG00000007200.4:ENSCAFT00000063451.1:exon6:c.A872G:p.K291R,	ENSCAFG00000007200	SLC2-A1	SLC2-A1	chr17	36875088	36875088	A	G	tolerated(0.47)	0/1	56,4	0.073	60
1	nonsynonymous SNV	ENSCAFG00000006523.3:ENSCAFT00000010530.3:exon9:c.G890T:p.W297L,ENSCAFG00000006523.3:ENSCAFT00000093418.1:exon9:c.G890T:p.W297L,	ENSCAFG00000006523	LRRC56	LRRC56	chr18	25660108	25660108	G	T	tolerated(0.09)	0/1	30,3	0.12	33
1	synonymous SNV	ENSCAFG00000009342.4:ENSCAFT00000014876.4:exon8:c.G1155A:p.P385P,	ENSCAFG00000009342	LARGE2	LARGE2	chr18	43499805	43499805	C	T	-	0/1	24,3	0.13	27
1	nonsynonymous SNV	ENSCAFG00000004329.5:ENSCAFT00000062813.1:exon12:c.A1427C:p.N476T,ENSCAFG00000004329.5:ENSCAFT00000006944.4:exon13:c.A1505C:p.N502T,	ENSCAFG00000004329	APBB1IP	APBB1IP	chr2	7151930	7151930	T	G	tolerated_low_confidence(0.26)	0|1	61,3	0.089	64
1	nonsynonymous SNV	ENSCAFG00000004329.5:ENSCAFT00000062813.1:exon12:c.G1424T:p.G475V,ENSCAFG00000004329.5:ENSCAFT00000006944.4:exon13:c.G1502T:p.G501V,	ENSCAFG00000004329	APBB1IP	APBB1IP	chr2	7151933	7151933	C	A	tolerated_low_confidence(0.29)	0|1	61,3	0.089	64
1	nonsynonymous SNV	ENSCAFG00000003989.4:ENSCAFT00000088813.1:exon17:c.C3382T:p.R1128C,ENSCAFG00000003989.4:ENSCAFT00000006429.4:exon11:c.C2542T:p.R848C,ENSCAFG00000003989.4:ENSCAFT00000071055.1:exon9:c.C2431T:p.R811C,ENSCAFG00000003989.4:ENSCAFT00000061430.1:exon11:c.C2542T:p.R848C,ENSCAFG00000003989.4:ENSCAFT00000084688.1:exon16:c.C3451T:p.R1151C,ENSCAFG00000003989.4:ENSCAFT00000069158.1:exon13:c.C2704T:p.R902C,EN…	ENSCAFG00000003989	PLXNA1	PLXNA1	chr20	1165857	1165857	C	T	deleterious(0)	0/1	14,8	0.375	22
1	nonsynonymous SNV	ENSCAFG00000011477.5:ENSCAFT00000018212.5:exon5:c.C6898T:p.P2300S,ENSCAFG00000011477.5:ENSCAFT00000074391.1:exon6:c.C6958T:p.P2320S,	ENSCAFG00000011477	BSN	BSN	chr20	39613989	39613989	G	A	deleterious(0.05)	0/1	16,3	0.187	19
1	stopgain	ENSCAFG00000012685.3:ENSCAFT00000020240.3:exon10:c.C1924T:p.Q642X,ENSCAFG00000012685.3:ENSCAFT00000083069.1:exon10:c.C1924T:p.Q642X,	ENSCAFG00000012685	PLXNB1	PLXNB1	chr20	40667974	40667974	C	T	-	0/1	25,3	0.136	28
1	synonymous SNV	ENSCAFG00000018590.4:ENSCAFT00000078767.1:exon4:c.A417G:p.E139E,ENSCAFG00000018590.4:ENSCAFT00000087887.1:exon4:c.A417G:p.E139E,ENSCAFG00000018590.4:ENSCAFT00000067974.1:exon4:c.A417G:p.E139E,ENSCAFG00000018590.4:ENSCAFT00000078583.1:exon2:c.A201G:p.E67E,ENSCAFG00000018590.4:ENSCAFT00000079586.1:exon4:c.A417G:p.E139E,ENSCAFG00000018590.4:ENSCAFT00000029523.4:exon4:c.A417G:p.E139E,	ENSCAFG00000018590	VAV1	VAV1	chr20	53505488	53505488	T	C	-	0/1	54,4	0.075	58
1	nonsynonymous SNV	ENSCAFG00000003991.4:ENSCAFT00000080962.1:exon6:c.T338A:p.I113K,ENSCAFG00000003991.4:ENSCAFT00000086607.1:exon5:c.T236A:p.I79K,ENSCAFG00000003991.4:ENSCAFT00000065673.1:exon5:c.T263A:p.I88K,ENSCAFG00000003991.4:ENSCAFT00000087352.1:exon5:c.T380A:p.I127K,ENSCAFG00000003991.4:ENSCAFT00000063340.1:exon5:c.T260A:p.I87K,ENSCAFG00000003991.4:ENSCAFT00000006400.4:exon6:c.T365A:p.I122K,ENSCAFG00000003991…	ENSCAFG00000003991	ARHGAP42	ARHGAP42	chr21	682438	682438	A	T	tolerated(0.29)	0/1	23,14	0.444	37
1	nonsynonymous SNV	ENSCAFG00000007373.4:ENSCAFT00000076543.1:exon6:c.G610A:p.A204T,ENSCAFG00000007373.4:ENSCAFT00000071052.1:exon6:c.G619A:p.A207T,ENSCAFG00000007373.4:ENSCAFT00000011870.4:exon7:c.G703A:p.A235T,	ENSCAFG00000007373	ZNF143	ZNF143	chr21	32789722	32789722	G	A	tolerated(0.07)	0/1	42,5	0.114	47
1	nonsynonymous SNV	ENSCAFG00000004478.5:ENSCAFT00000007211.4:exon18:c.G1859A:p.C620Y,ENSCAFG00000004478.5:ENSCAFT00000089643.1:exon17:c.G1772A:p.C591Y,ENSCAFG00000004478.5:ENSCAFT00000047511.3:exon17:c.G1718A:p.C573Y,ENSCAFG00000004478.5:ENSCAFT00000071784.1:exon18:c.G1859A:p.C620Y,ENSCAFG00000004478.5:ENSCAFT00000067211.1:exon17:c.G1754A:p.C585Y,	ENSCAFG00000004478	LRCH1	LRCH1	chr22	4600607	4600607	C	T	deleterious(0)	0/1	68,4	0.064	72
1	nonsynonymous SNV	ENSCAFG00000005838.4:ENSCAFT00000009430.4:exon20:c.G1828A:p.V610I,ENSCAFG00000005838.4:ENSCAFT00000089055.1:exon19:c.G1717A:p.V573I,ENSCAFG00000005838.4:ENSCAFT00000089890.1:exon20:c.G1828A:p.V610I,ENSCAFG00000005838.4:ENSCAFT00000067039.1:exon20:c.G1828A:p.V610I,ENSCAFG00000005838.4:ENSCAFT00000073964.1:exon20:c.G1828A:p.V610I,ENSCAFG00000005838.4:ENSCAFT00000082577.1:exon20:c.G1828A:p.V610I,ENS…	ENSCAFG00000005838	PCCA	PCCA	chr22	50328832	50328832	G	A	tolerated(0.62)	0/1	32,3	0.114	35
1	synonymous SNV	ENSCAFG00000006405.4:ENSCAFT00000070969.1:exon1:c.G24A:p.L8L,ENSCAFG00000006405.4:ENSCAFT00000010349.4:exon1:c.G24A:p.L8L,ENSCAFG00000006405.4:ENSCAFT00000079946.1:exon1:c.G24A:p.L8L,	ENSCAFG00000006405	UBA5	UBA5	chr23	29645989	29645989	G	A	-	0/1	12,3	0.273	15
1	nonsynonymous SNV	ENSCAFG00000006175.5:ENSCAFT00000061297.1:exon1:c.G257A:p.S86N,ENSCAFG00000006175.5:ENSCAFT00000073820.1:exon1:c.G257A:p.S86N,ENSCAFG00000006175.5:ENSCAFT00000080753.1:exon1:c.G257A:p.S86N,ENSCAFG00000006175.5:ENSCAFT00000009996.4:exon1:c.G257A:p.S86N,ENSCAFG00000006175.5:ENSCAFT00000077427.1:exon1:c.G257A:p.S86N,	ENSCAFG00000006175	CDC25B	CDC25B	chr24	17560762	17560762	C	T	deleterious_low_confidence(0)	0/1	50,4	0.102	54
1	nonsynonymous SNV	ENSCAFG00000007460.5:ENSCAFT00000079206.1:exon3:c.G295A:p.A99T,ENSCAFG00000007460.5:ENSCAFT00000077287.1:exon2:c.G169A:p.A57T,ENSCAFG00000007460.5:ENSCAFT00000083038.1:exon3:c.G271A:p.A91T,ENSCAFG00000007460.5:ENSCAFT00000011958.5:exon3:c.G295A:p.A99T,	ENSCAFG00000007460	ZNF341	ZNF341	chr24	22945989	22945989	G	A	deleterious(0.02)	0/1	56,4	0.076	60
1	nonsynonymous SNV	ENSCAFG00000006952.4:ENSCAFT00000011159.4:exon4:c.G619A:p.A207T,	ENSCAFG00000006952	DHX37	DHX37	chr26	4972664	4972664	G	A	tolerated(0.48)	0/1	58,4	0.07	62
1	nonsynonymous SNV	ENSCAFG00000007764.3:ENSCAFT00000074370.1:exon14:c.A1396G:p.K466E,ENSCAFG00000007764.3:ENSCAFT00000012451.3:exon16:c.A1459G:p.K487E,	ENSCAFG00000007764	HIP1R	HIP1R	chr26	6629995	6629995	T	C	tolerated(0.06)	0/1	21,3	0.168	24
1	nonsynonymous SNV	ENSCAFG00000008916.5:ENSCAFT00000014160.4:exon4:c.G221A:p.R74H,ENSCAFG00000008916.5:ENSCAFT00000049747.3:exon6:c.G233A:p.R78H,ENSCAFG00000008916.5:ENSCAFT00000074871.1:exon5:c.G86A:p.R29H,	ENSCAFG00000008916	RPH3A	RPH3A	chr26	10340367	10340367	G	A	deleterious(0)	0/1	28,20	0.424	48
1	stopgain	ENSCAFG00000028847.2:ENSCAFT00000087215.1:exon2:c.C166T:p.Q56X,ENSCAFG00000028847.2:ENSCAFT00000059676.1:exon2:c.C166T:p.Q56X,ENSCAFG00000028847.2:ENSCAFT00000077538.1:exon2:c.C166T:p.Q56X,ENSCAFG00000028847.2:ENSCAFT00000080425.1:exon2:c.C166T:p.Q56X,	ENSCAFG00000028847	-	IGLV4-3	chr26	27547073	27547073	C	T	-	0/1	16,4	0.2	20
1	nonsynonymous SNV	ENSCAFG00000014232.4:ENSCAFT00000059861.1:exon2:c.C389T:p.T130I,ENSCAFG00000014232.4:ENSCAFT00000067969.1:exon3:c.C524T:p.T175I,ENSCAFG00000014232.4:ENSCAFT00000080802.1:exon3:c.C524T:p.T175I,ENSCAFG00000014232.4:ENSCAFT00000022635.4:exon4:c.C278T:p.T93I,ENSCAFG00000014232.4:ENSCAFT00000067689.1:exon3:c.C524T:p.T175I,	ENSCAFG00000014232	ARVCF	ARVCF	chr26	29347096	29347096	C	T	deleterious(0)	0/1	21,3	0.175	24
1	nonsynonymous SNV	ENSCAFG00000014896.6:ENSCAFT00000046351.2:exon3:c.T1192C:p.C398R,	ENSCAFG00000014896	SCARF2	SCARF2	chr26	30237700	30237700	A	G	deleterious(0)	0/1	12,4	0.25	16
1	nonsynonymous SNV	ENSCAFG00000013401.5:ENSCAFT00000021267.5:exon3:c.C130T:p.R44W,ENSCAFG00000013401.5:ENSCAFT00000044569.2:exon3:c.C130T:p.R44W,	ENSCAFG00000013401	YBX3	YBX3	chr27	35047580	35047580	C	T	deleterious(0.01)	0/1	32,3	0.13	35
1	nonsynonymous SNV	ENSCAFG00000029534.2:ENSCAFT00000044725.2:exon1:c.G26T:p.G9V,	ENSCAFG00000029534	BLOC1S2	BLOC1S2	chr28	13044286	13044286	C	A	deleterious(0.04)	0/1	9,3	0.3	12
1	nonsynonymous SNV	ENSCAFG00000012140.4:ENSCAFT00000019302.4:exon8:c.T925C:p.Y309H,ENSCAFG00000012140.4:ENSCAFT00000072576.1:exon8:c.T925C:p.Y309H,ENSCAFG00000012140.4:ENSCAFT00000092684.1:exon7:c.T802C:p.Y268H,	ENSCAFG00000012140	PRC1	PRC1	chr3	53268604	53268604	T	C	deleterious(0.02)	0|1	10,2	0.2	12
1	nonsynonymous SNV	ENSCAFG00000015929.5:ENSCAFT00000073047.1:exon17:c.A5254G:p.N1752D,	ENSCAFG00000015929	N4BP2	N4BP2	chr3	72323020	72323020	T	C	-	0/1	23,16	0.414	39
1	nonsynonymous SNV	ENSCAFG00000007829.5:ENSCAFT00000046190.2:exon1:c.C937T:p.R313W,	ENSCAFG00000007829	-	NUTM1	chr30	756246	756246	G	A	deleterious(0)	0/1	26,3	0.15	29
1	nonsynonymous SNV	ENSCAFG00000010236.6:ENSCAFT00000016249.6:exon10:c.T1558C:p.S520P,ENSCAFG00000010236.6:ENSCAFT00000077368.1:exon10:c.T1558C:p.S520P,	ENSCAFG00000010236	UMODL1	UMODL1	chr31	36481650	36481650	T	C	deleterious(0.04)	0/1	20,4	0.175	24
1	synonymous SNV	ENSCAFG00000010539.5:ENSCAFT00000016779.4:exon7:c.G636A:p.L212L,ENSCAFG00000010539.5:ENSCAFT00000046548.3:exon7:c.G636A:p.L212L,	ENSCAFG00000010539	-	CBSL	chr31	37241786	37241786	C	T	-	0/1	22,3	0.176	25
1	synonymous SNV	ENSCAFG00000010988.5:ENSCAFT00000037604.4:exon4:c.C300A:p.S100S,ENSCAFG00000010988.5:ENSCAFT00000017477.4:exon3:c.C498A:p.S166S,ENSCAFG00000010988.5:ENSCAFT00000088938.1:exon4:c.C162A:p.S54S,	ENSCAFG00000010988	CFAP41-	CFAP41-	chr31	38187134	38187134	G	T	-	0/1	15,6	0.221	21
1	nonsynonymous SNV	ENSCAFG00000010536.5:ENSCAFT00000090366.1:exon31:c.T2939C:p.V980A,ENSCAFG00000010536.5:ENSCAFT00000075525.1:exon34:c.T3095C:p.V1032A,ENSCAFG00000010536.5:ENSCAFT00000090079.1:exon33:c.T3077C:p.V1026A,ENSCAFG00000010536.5:ENSCAFT00000087381.1:exon31:c.T2933C:p.V978A,ENSCAFG00000010536.5:ENSCAFT00000086093.1:exon31:c.T2960C:p.V987A,ENSCAFG00000010536.5:ENSCAFT00000016760.4:exon33:c.T3077C:p.V1026A,…	ENSCAFG00000010536	CARMIL1	CARMIL1	chr35	23553372	23553372	T	C	deleterious(0)	0/1	47,6	0.111	53
1	nonsynonymous SNV	ENSCAFG00000045750.1:ENSCAFT00000080570.1:exon1:c.A83T:p.K28M,	ENSCAFG00000045750	H3C8	H3C3	chr35	24187506	24187506	T	A	deleterious_low_confidence(0.01)	0/1	41,35	0.423	76
1	frameshift insertion	ENSCAFG00000009984.5:ENSCAFT00000015885.5:exon6:c.1241dupC:p.S414fs,	ENSCAFG00000009984	TBR1	TBR1	chr36	6997091	6997091	-	C	-	0/1	20,15	0.417	35
1	nonsynonymous SNV	ENSCAFG00000013096.5:ENSCAFT00000083944.1:exon5:c.A167G:p.Y56C,ENSCAFG00000013096.5:ENSCAFT00000048090.2:exon5:c.A248G:p.Y83C,ENSCAFG00000013096.5:ENSCAFT00000020803.5:exon8:c.A221G:p.Y74C,ENSCAFG00000013096.5:ENSCAFT00000090387.1:exon7:c.A356G:p.Y119C,	ENSCAFG00000013096	RAPGEF4	RAPGEF4	chr36	17239370	17239370	A	G	deleterious(0.01)	0/1	22,4	0.142	26
1	nonsynonymous SNV	ENSCAFG00000014025.4:ENSCAFT00000068029.1:exon47:c.C15683T:p.P5228L,	ENSCAFG00000014025	TTN	-	chr36	22355010	22355010	G	A	-	0/1	58,37	0.382	95
1	synonymous SNV	ENSCAFG00000012773.4:ENSCAFT00000020298.4:exon10:c.C1800T:p.S600S,	ENSCAFG00000012773	USP21	USP21	chr38	21313923	21313923	G	A	-	0/1	22,4	0.158	26
1	nonsynonymous SNV	ENSCAFG00000018996.4:ENSCAFT00000030188.4:exon3:c.G347A:p.R116K,	ENSCAFG00000018996	CDH1-	CDH1-	chr4	81046855	81046855	G	A	tolerated(0.38)	0/1	15,22	0.53	37
1	nonsynonymous SNV	ENSCAFG00000020099.4:ENSCAFT00000067660.1:exon11:c.A956G:p.Q319R,ENSCAFG00000020099.4:ENSCAFT00000069663.1:exon8:c.A743G:p.Q248R,ENSCAFG00000020099.4:ENSCAFT00000059591.1:exon11:c.A956G:p.Q319R,ENSCAFG00000020099.4:ENSCAFT00000031993.4:exon11:c.A956G:p.Q319R,	ENSCAFG00000020099	WDR59	WDR59	chr5	75762392	75762392	A	G	tolerated(0.42)	0/1	54,6	0.105	60
1	synonymous SNV	ENSCAFG00000020217.5:ENSCAFT00000047274.2:exon16:c.T2670C:p.G890G,ENSCAFG00000020217.5:ENSCAFT00000032201.5:exon14:c.T2346C:p.G782G,	ENSCAFG00000020217	PKD1L3	PKD1L3	chr5	77718778	77718778	A	G	-	0/1	16,4	0.165	20
1	nonsynonymous SNV	ENSCAFG00000020409.5:ENSCAFT00000032501.5:exon2:c.A179G:p.E60G,ENSCAFG00000020409.5:ENSCAFT00000047770.2:exon2:c.A179G:p.E60G,	ENSCAFG00000020409	DYNC1LI2	DYNC1LI2	chr5	82542010	82542010	A	G	deleterious(0)	0/1	19,4	0.186	23
1	nonsynonymous SNV	ENSCAFG00000016463.4:ENSCAFT00000026097.4:exon18:c.C1735T:p.R579W,ENSCAFG00000016463.4:ENSCAFT00000069273.1:exon16:c.C1558T:p.R520W,ENSCAFG00000016463.4:ENSCAFT00000072231.1:exon17:c.C1594T:p.R532W,	ENSCAFG00000016463	MAD1L1	MAD1L1	chr6	15162120	15162120	C	T	deleterious(0)	0/1	18,3	0.185	21
1	synonymous SNV	ENSCAFG00000019847.4:ENSCAFT00000031572.4:exon7:c.T786C:p.Y262Y,ENSCAFG00000019847.4:ENSCAFT00000075886.1:exon7:c.T786C:p.Y262Y,	ENSCAFG00000019847	SARS1	SARS1	chr6	42587931	42587931	A	G	-	0/1	19,3	0.158	22
1	nonsynonymous SNV	ENSCAFG00000012347.4:ENSCAFT00000019591.4:exon1:c.G1550A:p.G517D,	ENSCAFG00000012347	FAM71A	FAM71A	chr7	10801725	10801725	G	A	tolerated(0.2)	0/1	9,3	0.273	12
1	synonymous SNV	ENSCAFG00000017141.6:ENSCAFT00000088478.1:exon6:c.C918T:p.Y306Y,ENSCAFG00000017141.6:ENSCAFT00000063323.1:exon7:c.C870T:p.Y290Y,ENSCAFG00000017141.6:ENSCAFT00000059583.1:exon6:c.C933T:p.Y311Y,ENSCAFG00000017141.6:ENSCAFT00000027147.6:exon6:c.C885T:p.Y295Y,ENSCAFG00000017141.6:ENSCAFT00000082341.1:exon7:c.C1110T:p.Y370Y,	ENSCAFG00000017141	ESRRB	ESRRB	chr8	49415194	49415194	C	T	-	0/1	27,3	0.124	30
1	nonsynonymous SNV	ENSCAFG00000018401.5:ENSCAFT00000029230.5:exon10:c.T1246C:p.S416P,	ENSCAFG00000018401	JAG2	JAG2	chr8	72543605	72543605	A	G	deleterious(0.01)	0/1	11,3	0.25	14
1	stopgain	ENSCAFG00000006006.4:ENSCAFT00000009737.4:exon26:c.C4909T:p.Q1637X,	ENSCAFG00000006006	FASN	FASN	chr9	244828	244828	C	T	-	0/1	17,4	0.213	21
1	nonsynonymous SNV	ENSCAFG00000012146.5:ENSCAFT00000019738.5:exon24:c.T4454C:p.I1485T,	ENSCAFG00000012146	SCN4A	SCN4A	chr9	11852407	11852407	A	G	deleterious(0)	0/1	23,4	0.136	27
1	nonsynonymous SNV	ENSCAFG00000011281.4:ENSCAFT00000066209.1:exon5:c.C452T:p.A151V,ENSCAFG00000011281.4:ENSCAFT00000017923.4:exon5:c.C452T:p.A151V,	ENSCAFG00000011281	APOH	APOH	chr9	14088578	14088578	C	T	deleterious(0.01)	0/1	42,8	0.147	50
1	nonsynonymous SNV	ENSCAFG00000016060.5:ENSCAFT00000079126.1:exon4:c.C603G:p.H201Q,ENSCAFG00000016060.5:ENSCAFT00000035664.4:exon6:c.C777G:p.H259Q,ENSCAFG00000016060.5:ENSCAFT00000011311.4:exon7:c.C894G:p.H298Q,	ENSCAFG00000016060	RARA	RARA	chr9	22257283	22257283	G	C	tolerated(0.07)	0/1	63,18	0.227	81
1	synonymous SNV	ENSCAFG00000020181.5:ENSCAFT00000032150.4:exon11:c.G2307A:p.S769S,ENSCAFG00000020181.5:ENSCAFT00000032151.5:exon12:c.G2388A:p.S796S,ENSCAFG00000020181.5:ENSCAFT00000032152.5:exon10:c.G2166A:p.S722S,	ENSCAFG00000020181	GAPVD1	GAPVD1	chr9	57779261	57779261	C	T	-	0/1	7,38	0.844	45
1	synonymous SNV	ENSCAFG00000017381.7:ENSCAFT00000027537.7:exon12:c.C4149T:p.V1383V,ENSCAFG00000017381.7:ENSCAFT00000049576.3:exon13:c.C4149T:p.V1383V,	ENSCAFG00000017381	-	-	chrX	65804027	65804027	C	T	-	0/1	76,48	0.4	124
1	synonymous SNV	ENSCAFG00000019243.5:ENSCAFT00000030544.5:exon8:c.C951T:p.C317C,	ENSCAFG00000019243	SLC6A8	SLC6A8	chrX	121509198	121509198	C	T	-	0/1	27,4	0.136	31
2	stopgain	ENSCAFG00000000017.4:ENSCAFT00000000028.4:exon25:c.C4520A:p.S1507X,	ENSCAFG00000000017	ZNF236	ZNF236	chr1	2984147	2984147	G	T	-	0/1	39,5	0.129	44
2	frameshift insertion	ENSCAFG00000004029.4:ENSCAFT00000075983.1:exon6:c.787_788insC:p.E263fs,ENSCAFG00000004029.4:ENSCAFT00000006450.4:exon4:c.694_695insC:p.E232fs,ENSCAFG00000004029.4:ENSCAFT00000067783.1:exon4:c.487_488insC:p.E163fs,ENSCAFG00000004029.4:ENSCAFT00000081765.1:exon5:c.799_800insC:p.E267fs,	ENSCAFG00000004029	TMEM143	TMEM143	chr1	107893374	107893374	-	C	-	0/1	68,3	0.051	71
2	synonymous SNV	ENSCAFG00000005941.5:ENSCAFT00000043287.2:exon2:c.G342A:p.P114P,ENSCAFG00000005941.5:ENSCAFT00000009597.5:exon2:c.G342A:p.P114P,	ENSCAFG00000005941	KCNK6	KCNK6	chr1	114670871	114670871	C	T	-	0/1	23,13	0.423	36
2	nonsynonymous SNV	ENSCAFG00000000108.5:ENSCAFT00000088866.1:exon3:c.G293A:p.R98H,ENSCAFG00000000108.5:ENSCAFT00000045762.2:exon12:c.G1847A:p.R616H,ENSCAFG00000000108.5:ENSCAFT00000083712.1:exon12:c.G1937A:p.R646H,ENSCAFG00000000108.5:ENSCAFT00000000170.5:exon12:c.G1748A:p.R583H,	ENSCAFG00000000108	ESYT1	ESYT1	chr10	456440	456440	G	A	tolerated(0.45)	0/1	102,4	0.056	106
2	frameshift insertion	ENSCAFG00000002659.4:ENSCAFT00000004191.4:exon15:c.2519dupT:p.V840fs,ENSCAFG00000002659.4:ENSCAFT00000077976.1:exon15:c.2519dupT:p.V840fs,ENSCAFG00000002659.4:ENSCAFT00000061270.1:exon14:c.2240dupT:p.V747fs,ENSCAFG00000002659.4:ENSCAFT00000075754.1:exon15:c.2519dupT:p.V840fs,	ENSCAFG00000002659	MSH2	MSH2	chr10	49591671	49591671	-	T	-	0/1	16,19	0.54	35
2	nonsynonymous SNV	ENSCAFG00000003407.4:ENSCAFT00000090540.1:exon5:c.G448A:p.A150T,ENSCAFG00000003407.4:ENSCAFT00000005489.4:exon4:c.G448A:p.A150T,	ENSCAFG00000003407	ADD2	ADD2	chr10	69081806	69081806	C	T	tolerated(0.13)	0/1	53,4	0.088	57
2	nonsynonymous SNV	ENSCAFG00000003549.4:ENSCAFT00000080934.1:exon15:c.G1789A:p.A597T,ENSCAFG00000003549.4:ENSCAFT00000072441.1:exon16:c.G1105A:p.A369T,ENSCAFG00000003549.4:ENSCAFT00000074491.1:exon15:c.G1789A:p.A597T,ENSCAFG00000003549.4:ENSCAFT00000069069.1:exon16:c.G1864A:p.A622T,ENSCAFG00000003549.4:ENSCAFT00000082102.1:exon12:c.G1426A:p.A476T,ENSCAFG00000003549.4:ENSCAFT00000068297.1:exon16:c.G1864A:p.A622T,ENS…	ENSCAFG00000003549	ROCK2	ROCK2	chr17	7967622	7967622	C	T	tolerated(0.56)	0/1	78,4	0.066	82
2	nonsynonymous SNV	ENSCAFG00000003579.5:ENSCAFT00000073991.1:exon10:c.C1451T:p.A484V,ENSCAFG00000003579.5:ENSCAFT00000081703.1:exon10:c.C1691T:p.A564V,ENSCAFG00000003579.5:ENSCAFT00000060971.1:exon9:c.C1577T:p.A526V,ENSCAFG00000003579.5:ENSCAFT00000074904.1:exon9:c.C1562T:p.A521V,ENSCAFG00000003579.5:ENSCAFT00000005749.4:exon10:c.C1691T:p.A564V,ENSCAFG00000003579.5:ENSCAFT00000050023.3:exon10:c.C1691T:p.A564V,	ENSCAFG00000003579	GREB1	GREB1	chr17	8280098	8280098	C	T	tolerated(1)	0/1	15,4	0.267	19
2	nonsynonymous SNV	ENSCAFG00000010388.4:ENSCAFT00000066097.1:exon3:c.A263G:p.Q88R,ENSCAFG00000010388.4:ENSCAFT00000087903.1:exon3:c.A239G:p.Q80R,ENSCAFG00000010388.4:ENSCAFT00000016530.4:exon3:c.A239G:p.Q80R,	ENSCAFG00000010388	NADSYN1	NADSYN1	chr18	47248801	47248801	T	C	tolerated(0.21)	0/1	22,4	0.149	26
2	nonsynonymous SNV	ENSCAFG00000005869.6:ENSCAFT00000009474.6:exon10:c.G802A:p.A268T,	ENSCAFG00000005869	IK	IK	chr2	35813459	35813459	G	A	tolerated(0.37)	0/1	55,4	0.092	59
2	nonsynonymous SNV	ENSCAFG00000006735.4:ENSCAFT00000028805.4:exon3:c.A272G:p.H91R,	ENSCAFG00000006735	GZMA	GZMA	chr2	42495690	42495690	A	G	deleterious(0)	0/1	42,6	0.151	48
2	nonsynonymous SNV	ENSCAFG00000006496.5:ENSCAFT00000074962.1:exon2:c.A173G:p.K58R,ENSCAFG00000006496.5:ENSCAFT00000047433.3:exon2:c.A86G:p.K29R,ENSCAFG00000006496.5:ENSCAFT00000092739.1:exon2:c.A173G:p.K58R,	ENSCAFG00000006496	MITF	MITF	chr20	21784138	21784138	A	G	tolerated_low_confidence(0.2)	0/1	15,4	0.175	19
2	nonsynonymous SNV	ENSCAFG00000014030.4:ENSCAFT00000080598.1:exon10:c.C1361G:p.T454S,ENSCAFG00000014030.4:ENSCAFT00000022273.4:exon11:c.C1292G:p.T431S,ENSCAFG00000014030.4:ENSCAFT00000071645.1:exon9:c.C905G:p.T302S,ENSCAFG00000014030.4:ENSCAFT00000090849.1:exon10:c.C1034G:p.T345S,ENSCAFG00000014030.4:ENSCAFT00000069391.1:exon11:c.C1469G:p.T490S,ENSCAFG00000014030.4:ENSCAFT00000086910.1:exon10:c.C1340G:p.T447S,ENSCA…	ENSCAFG00000014030	LARS2	LARS2	chr20	42945587	42945587	G	C	tolerated(0.2)	0|1	63,5	0.1	68
2	nonsynonymous SNV	ENSCAFG00000005549.5:ENSCAFT00000008943.4:exon2:c.A212G:p.D71G,ENSCAFG00000005549.5:ENSCAFT00000044385.3:exon2:c.A212G:p.D71G,	ENSCAFG00000005549	C2CD3	C2CD3	chr21	24132065	24132065	A	G	tolerated(0.11)	0/1	41,39	0.492	80
2	nonsynonymous SNV	ENSCAFG00000004969.4:ENSCAFT00000078418.1:exon8:c.G1141A:p.G381S,ENSCAFG00000004969.4:ENSCAFT00000007985.4:exon9:c.G1666A:p.G556S,	ENSCAFG00000004969	KLHL1	KLHL1	chr22	24229098	24229098	C	T	deleterious(0.01)	0/1	16,4	0.2	20
2	synonymous SNV	ENSCAFG00000008838.5:ENSCAFT00000014072.4:exon12:c.A819G:p.G273G,ENSCAFG00000008838.5:ENSCAFT00000085358.1:exon11:c.A732G:p.G244G,ENSCAFG00000008838.5:ENSCAFT00000087731.1:exon11:c.A840G:p.G280G,ENSCAFG00000008838.5:ENSCAFT00000087634.1:exon12:c.A819G:p.G273G,ENSCAFG00000008838.5:ENSCAFT00000082551.1:exon12:c.A819G:p.G273G,ENSCAFG00000008838.5:ENSCAFT00000014066.5:exon11:c.A873G:p.G291G,ENSCAFG00…	ENSCAFG00000008838	KCNAB1	KCNAB1	chr23	50118731	50118731	A	G	-	0/1	24,3	0.136	27
2	nonsynonymous SNV	ENSCAFG00000006460.4:ENSCAFT00000079505.1:exon12:c.G1318A:p.V440I,ENSCAFG00000006460.4:ENSCAFT00000083202.1:exon12:c.G1318A:p.V440I,ENSCAFG00000006460.4:ENSCAFT00000066874.1:exon12:c.G1318A:p.V440I,ENSCAFG00000006460.4:ENSCAFT00000010477.4:exon11:c.G1291A:p.V431I,	ENSCAFG00000006460	PTPRA	PTPRA	chr24	18246115	18246115	C	T	deleterious(0)	0/1	28,3	0.13	31
2	synonymous SNV	ENSCAFG00000012846.4:ENSCAFT00000087688.1:exon4:c.C504T:p.P168P,ENSCAFG00000012846.4:ENSCAFT00000065847.1:exon8:c.C936T:p.P312P,ENSCAFG00000012846.4:ENSCAFT00000020384.4:exon8:c.C936T:p.P312P,	ENSCAFG00000012846	PASK	PASK	chr25	51164894	51164894	G	A	-	0/1	42,38	0.491	80
2	nonsynonymous SNV	ENSCAFG00000012270.4:ENSCAFT00000019531.4:exon10:c.G1834A:p.A612T,ENSCAFG00000012270.4:ENSCAFT00000093345.1:exon9:c.G1744A:p.A582T,ENSCAFG00000012270.4:ENSCAFT00000080782.1:exon10:c.G1834A:p.A612T,	ENSCAFG00000012270	SEC23IP	SEC23IP	chr28	30024846	30024846	G	A	tolerated(0.35)	0/1	24,10	0.322	34
2	synonymous SNV	ENSCAFG00000006995.5:ENSCAFT00000011204.3:exon5:c.T1539C:p.S513S,	ENSCAFG00000006995	RP1	RP1	chr29	6130690	6130690	T	C	-	0/1	12,18	0.56	30
2	stopgain	ENSCAFG00000007810.4:ENSCAFT00000012490.4:exon17:c.T2361A:p.Y787X,	ENSCAFG00000007810	ERAP1	ERAP1	chr3	12912994	12912994	T	A	-	0|1	62,4	0.098	66
2	nonsynonymous SNV	ENSCAFG00000016608.5:ENSCAFT00000082842.1:exon36:c.A3823C:p.K1275Q,ENSCAFG00000016608.5:ENSCAFT00000026343.4:exon32:c.A3433C:p.K1145Q,ENSCAFG00000016608.5:ENSCAFT00000062102.1:exon35:c.A3811C:p.K1271Q,ENSCAFG00000016608.5:ENSCAFT00000044488.3:exon32:c.A3688C:p.K1230Q,ENSCAFG00000016608.5:ENSCAFT00000076619.1:exon35:c.A3796C:p.K1266Q,ENSCAFG00000016608.5:ENSCAFT00000090541.1:exon35:c.A3799C:p.K126…	ENSCAFG00000016608	SLIT2	SLIT2	chr3	88973374	88973374	T	G	tolerated(0.07)	0/1	66,5	0.071	71
2	nonsynonymous SNV	ENSCAFG00000016608.5:ENSCAFT00000082842.1:exon19:c.C1789T:p.R597C,ENSCAFG00000016608.5:ENSCAFT00000026343.4:exon16:c.C1426T:p.R476C,ENSCAFG00000016608.5:ENSCAFT00000062102.1:exon18:c.C1777T:p.R593C,ENSCAFG00000016608.5:ENSCAFT00000044488.3:exon16:c.C1681T:p.R561C,ENSCAFG00000016608.5:ENSCAFT00000076619.1:exon19:c.C1789T:p.R597C,ENSCAFG00000016608.5:ENSCAFT00000090541.1:exon18:c.C1765T:p.R589C,	ENSCAFG00000016608	SLIT2	SLIT2	chr3	89039565	89039565	G	A	deleterious(0)	0/1	43,25	0.34	68
2	nonsynonymous SNV	ENSCAFG00000045750.1:ENSCAFT00000080570.1:exon1:c.A83T:p.K28M,	ENSCAFG00000045750	H3C8	H3C3	chr35	24187506	24187506	T	A	deleterious_low_confidence(0.01)	0/1	68,64	0.467	132
2	nonsynonymous SNV	ENSCAFG00000011826.5:ENSCAFT00000048395.3:exon10:c.G1111T:p.G371W,ENSCAFG00000011826.5:ENSCAFT00000063757.1:exon11:c.G1096T:p.G366W,ENSCAFG00000011826.5:ENSCAFT00000018771.4:exon11:c.G1135T:p.G379W,	ENSCAFG00000011826	CERS6	CERS6	chr36	13602642	13602642	G	T	deleterious(0)	0|1	73,5	0.1	78
2	nonsynonymous SNV	ENSCAFG00000010822.4:ENSCAFT00000017321.4:exon5:c.C458T:p.A153V,ENSCAFG00000010822.4:ENSCAFT00000062795.1:exon5:c.C458T:p.A153V,	ENSCAFG00000010822	ACTN2	ACTN2	chr4	3381365	3381365	G	A	deleterious(0)	0/1	32,4	0.111	36
2	nonsynonymous SNV	ENSCAFG00000015995.4:ENSCAFT00000082793.1:exon11:c.T1313A:p.L438Q,ENSCAFG00000015995.4:ENSCAFT00000071078.1:exon7:c.T1517A:p.L506Q,ENSCAFG00000015995.4:ENSCAFT00000025383.4:exon7:c.T1517A:p.L506Q,ENSCAFG00000015995.4:ENSCAFT00000087904.1:exon7:c.T1517A:p.L506Q,ENSCAFG00000015995.4:ENSCAFT00000086368.1:exon13:c.T1442A:p.L481Q,	ENSCAFG00000015995	DLG4	DLG4	chr5	32168997	32168997	A	T	deleterious(0)	0|1	62,5	0.09	67
2	nonsynonymous SNV	ENSCAFG00000015242.6:ENSCAFT00000043609.2:exon17:c.C2162T:p.S721F,ENSCAFG00000015242.6:ENSCAFT00000063771.1:exon17:c.C2162T:p.S721F,ENSCAFG00000015242.6:ENSCAFT00000062212.1:exon17:c.C2162T:p.S721F,ENSCAFG00000015242.6:ENSCAFT00000024317.6:exon17:c.C2162T:p.S721F,ENSCAFG00000015242.6:ENSCAFT00000063243.1:exon17:c.C2162T:p.S721F,ENSCAFG00000015242.6:ENSCAFT00000063171.1:exon17:c.C2162T:p.S721F,ENS…	ENSCAFG00000015242	TRRAP	TRRAP	chr6	10607779	10607779	G	A	deleterious(0)	0/1	24,26	0.5	50
2	frameshift insertion	ENSCAFG00000015810.4:ENSCAFT00000062271.1:exon2:c.1528_1529insTCACGCAG:p.F510fs,ENSCAFG00000015810.4:ENSCAFT00000025045.4:exon3:c.1450_1451insTCACGCAG:p.F484fs,	ENSCAFG00000015810	ZBTB18	ZBTB18	chr7	35128988	35128988	-	TCACGCAG	-	0/1	29,29	0.499	58
2	synonymous SNV	ENSCAFG00000010708.3:ENSCAFT00000017035.3:exon1:c.G39A:p.L13L,	ENSCAFG00000010708	OR2H1-	-	chr8	333702	333702	C	T	-	0/1	39,22	0.378	61
2	stopgain	ENSCAFG00000018075.4:ENSCAFT00000028719.4:exon5:c.C517T:p.R173X,ENSCAFG00000018075.4:ENSCAFT00000085506.1:exon5:c.C517T:p.R173X,ENSCAFG00000018075.4:ENSCAFT00000086511.1:exon5:c.C517T:p.R173X,	ENSCAFG00000018075	TRAF3	TRAF3	chr8	70767969	70767969	C	T	-	0/1	14,41	0.685	55
2	nonsynonymous SNV	ENSCAFG00000046771.1:ENSCAFT00000077325.1:exon2:c.C526G:p.P176A,	ENSCAFG00000046771	-	IGHV4-4	chr8	73028237	73028237	G	C	tolerated_low_confidence(0.11)	0|1	10,34	0.743	44
2	nonsynonymous SNV	ENSCAFG00000046771.1:ENSCAFT00000077325.1:exon2:c.T524C:p.L175S,	ENSCAFG00000046771	-	IGHV4-4	chr8	73028239	73028239	A	G	deleterious_low_confidence(0)	0|1	10,34	0.743	44
2	stopgain	ENSCAFG00000046771.1:ENSCAFT00000077325.1:exon2:c.C336G:p.Y112X,	ENSCAFG00000046771	-	IGHV4-4	chr8	73028427	73028427	G	C	-	0/1	19,32	0.632	51
2	synonymous SNV	ENSCAFG00000046771.1:ENSCAFT00000077325.1:exon2:c.A225G:p.T75T,	ENSCAFG00000046771	-	IGHV4-4	chr8	73028538	73028538	T	C	-	0/1	17,44	0.713	61
2	nonsynonymous SNV	ENSCAFG00000020067.5:ENSCAFT00000049990.3:exon2:c.T125A:p.L42H,	ENSCAFG00000020067	COQ4	COQ4	chr9	55193496	55193496	A	T	deleterious(0.02)	0/1	24,12	0.323	36
2	nonsynonymous SNV	ENSCAFG00000014023.4:ENSCAFT00000022277.4:exon9:c.G871A:p.A291T,ENSCAFG00000014023.4:ENSCAFT00000077005.1:exon8:c.G817A:p.A273T,	ENSCAFG00000014023	OTC	OTC	chrX	33192973	33192973	G	A	deleterious(0.03)	0/1	15,3	0.228	18
2	nonsynonymous SNV	ENSCAFG00000014251.6:ENSCAFT00000086773.1:exon10:c.T917G:p.I306R,ENSCAFG00000014251.6:ENSCAFT00000061818.1:exon8:c.T695G:p.I232R,ENSCAFG00000014251.6:ENSCAFT00000045177.3:exon10:c.T917G:p.I306R,ENSCAFG00000014251.6:ENSCAFT00000092867.1:exon9:c.T818G:p.I273R,ENSCAFG00000014251.6:ENSCAFT00000022643.5:exon9:c.T869G:p.I290R,ENSCAFG00000014251.6:ENSCAFT00000061362.1:exon10:c.T917G:p.I306R,	ENSCAFG00000014251	DDX3X	DDX3X	chrX	35769774	35769774	T	G	deleterious(0)	0/1	3,19	0.85	22
2	synonymous SNV	ENSCAFG00000017419.4:ENSCAFT00000027603.4:exon7:c.G840A:p.L280L,ENSCAFG00000017419.4:ENSCAFT00000075734.1:exon9:c.G1356A:p.L452L,ENSCAFG00000017419.4:ENSCAFT00000076116.1:exon8:c.G1317A:p.L439L,	ENSCAFG00000017419	DACH2	DACH2	chrX	67667791	67667791	G	A	-	0/1	15,3	0.231	18
3	nonsynonymous SNV	ENSCAFG00000000860.6:ENSCAFT00000066236.1:exon29:c.G4562A:p.R1521H,ENSCAFG00000000860.6:ENSCAFT00000047722.3:exon28:c.G4517A:p.R1506H,ENSCAFG00000000860.6:ENSCAFT00000069119.1:exon28:c.G4541A:p.R1514H,ENSCAFG00000000860.6:ENSCAFT00000068310.1:exon28:c.G4541A:p.R1514H,ENSCAFG00000000860.6:ENSCAFT00000001341.5:exon29:c.G4562A:p.R1521H,ENSCAFG00000000860.6:ENSCAFT00000079765.1:exon28:c.G4367A:p.R145…	ENSCAFG00000000860	AFDN	AFDN	chr1	55517574	55517574	G	A	-	0/1	27,8	0.214	35
3	synonymous SNV	ENSCAFG00000002924.5:ENSCAFT00000045850.2:exon4:c.C438T:p.Y146Y,	ENSCAFG00000002924	SHANK1	SHANK1	chr1	106102472	106102472	C	T	-	0/1	65,11	0.157	76
3	nonsynonymous SNV	ENSCAFG00000047157.1:ENSCAFT00000084584.1:exon2:c.T340C:p.S114P,	ENSCAFG00000047157	-	-	chr1	106368110	106368110	T	C	-	0/1	15,4	0.2	19
3	nonsynonymous SNV	ENSCAFG00000004190.5:ENSCAFT00000080295.1:exon1:c.A2114G:p.K705R,ENSCAFG00000004190.5:ENSCAFT00000085119.1:exon1:c.A2114G:p.K705R,ENSCAFG00000004190.5:ENSCAFT00000006727.4:exon1:c.A2114G:p.K705R,ENSCAFG00000004190.5:ENSCAFT00000080599.1:exon1:c.A2114G:p.K705R,ENSCAFG00000004190.5:ENSCAFT00000049532.3:exon1:c.A2114G:p.K705R,ENSCAFG00000004190.5:ENSCAFT00000065482.1:exon1:c.A2114G:p.K705R,	ENSCAFG00000004190	ARHGAP35	ARHGAP35	chr1	109032023	109032023	T	C	tolerated(0.12)	0/1	96,27	0.191	123
3	stopgain	ENSCAFG00000004858.4:ENSCAFT00000082880.1:exon1:c.C355T:p.R119X,	ENSCAFG00000004858	CIC	CIC	chr1	112104728	112104728	G	A	-	0/1	41,12	0.225	53
3	nonsynonymous SNV	ENSCAFG00000007258.4:ENSCAFT00000011647.4:exon7:c.A630T:p.R210S,	ENSCAFG00000007258	UBA2	UBA2	chr1	117868736	117868736	T	A	tolerated(0.44)	0/1	51,6	0.098	57
3	nonsynonymous SNV	ENSCAFG00000000121.4:ENSCAFT00000000201.4:exon24:c.C2504T:p.T835M,ENSCAFG00000000121.4:ENSCAFT00000078420.1:exon23:c.C2405T:p.T802M,	ENSCAFG00000000121	STAT2	STAT2	chr10	642749	642749	G	A	tolerated_low_confidence(0.21)	0/1	91,31	0.272	122
3	synonymous SNV	ENSCAFG00000002147.4:ENSCAFT00000060467.1:exon1:c.C63T:p.D21D,	ENSCAFG00000002147	IL1R1	IL1R1	chr10	40861070	40861070	G	A	-	0/1	144,24	0.137	168
3	synonymous SNV	ENSCAFG00000000678.5:ENSCAFT00000071874.1:exon6:c.G2553T:p.P851P,ENSCAFG00000000678.5:ENSCAFT00000070685.1:exon9:c.G2721T:p.P907P,ENSCAFG00000000678.5:ENSCAFT00000087255.1:exon7:c.G2760T:p.P920P,ENSCAFG00000000678.5:ENSCAFT00000043829.2:exon8:c.G2616T:p.P872P,ENSCAFG00000000678.5:ENSCAFT00000001049.5:exon8:c.G2625T:p.P875P,	ENSCAFG00000000678	ZFPM2	ZFPM2	chr13	6795027	6795027	G	T	-	0/1	69,18	0.214	87
3	synonymous SNV	ENSCAFG00000002714.5:ENSCAFT00000004350.4:exon15:c.C2391T:p.T797T,	ENSCAFG00000002714	EPHA5	EPHA5	chr13	56079038	56079038	G	A	-	0/1	122,30	0.196	152
3	nonsynonymous SNV	ENSCAFG00000001754.4:ENSCAFT00000087472.1:exon11:c.G1420C:p.G474R,ENSCAFG00000001754.4:ENSCAFT00000002746.4:exon16:c.G1957C:p.G653R,ENSCAFG00000001754.4:ENSCAFT00000062245.1:exon17:c.G1873C:p.G625R,ENSCAFG00000001754.4:ENSCAFT00000080986.1:exon11:c.G1123C:p.G375R,ENSCAFG00000001754.4:ENSCAFT00000082826.1:exon13:c.G1792C:p.G598R,ENSCAFG00000001754.4:ENSCAFT00000086242.1:exon12:c.G1576C:p.G526R,	ENSCAFG00000001754	POT1	POT1	chr14	11056630	11056630	G	C	deleterious(0)	0/1	29,9	0.222	38
3	nonsynonymous SNV	ENSCAFG00000008141.5:ENSCAFT00000074984.1:exon8:c.G1040A:p.R347H,ENSCAFG00000008141.5:ENSCAFT00000012962.5:exon8:c.G1535A:p.R512H,ENSCAFG00000008141.5:ENSCAFT00000065773.1:exon8:c.G1154A:p.R385H,	ENSCAFG00000008141	FBXW7	FBXW7	chr15	50194595	50194595	C	T	deleterious(0)	0/1	82,9	0.095	91
3	nonsynonymous SNV	ENSCAFG00000003887.4:ENSCAFT00000006266.3:exon28:c.A12079T:p.I4027F,	ENSCAFG00000003887	APOB	APOB	chr17	15879146	15879146	T	A	tolerated(0.18)	0/1	80,15	0.173	95
3	nonsynonymous SNV	ENSCAFG00000023592.4:ENSCAFT00000063291.1:exon2:c.G868A:p.E290K,ENSCAFG00000023592.4:ENSCAFT00000036362.4:exon2:c.G868A:p.E290K,ENSCAFG00000023592.4:ENSCAFT00000036363.3:exon2:c.G868A:p.E290K,ENSCAFG00000023592.4:ENSCAFT00000010451.5:exon2:c.G868A:p.E290K,	ENSCAFG00000023592	SLC8A1	SLC8A1	chr17	32306832	32306832	C	T	tolerated(0.06)	0/1	110,49	0.303	159
3	synonymous SNV	ENSCAFG00000014131.4:ENSCAFT00000022427.4:exon7:c.C672T:p.D224D,ENSCAFG00000014131.4:ENSCAFT00000068076.1:exon6:c.C1092T:p.D364D,ENSCAFG00000014131.4:ENSCAFT00000069693.1:exon6:c.C657T:p.D219D,	ENSCAFG00000014131	C18H7orf57	C7orf57	chr18	93970	93970	C	T	-	0/1	23,8	0.217	31
3	synonymous SNV	ENSCAFG00000009342.4:ENSCAFT00000014876.4:exon1:c.G33C:p.G11G,	ENSCAFG00000009342	LARGE2	LARGE2	chr18	43502527	43502527	C	G	-	0/1	13,4	0.253	17
3	nonsynonymous SNV	ENSCAFG00000010920.5:ENSCAFT00000047592.3:exon10:c.G1882A:p.E628K,ENSCAFG00000010920.5:ENSCAFT00000017376.3:exon10:c.G1873A:p.E625K,	ENSCAFG00000010920	KMT5B	KMT5B	chr18	49688452	49688452	G	A	deleterious_low_confidence(0.04)	0/1	49,4	0.073	53
3	frameshift deletion	ENSCAFG00000005723.4:ENSCAFT00000079022.1:exon1:c.290delA:p.E97fs,ENSCAFG00000005723.4:ENSCAFT00000009213.4:exon1:c.290delA:p.E97fs,ENSCAFG00000005723.4:ENSCAFT00000075685.1:exon1:c.290delA:p.E97fs,	ENSCAFG00000005723	PSD2	PSD2	chr2	34936316	34936316	A	-	-	0/1	42,4	0.093	46
3	synonymous SNV	ENSCAFG00000006293.4:ENSCAFT00000060238.1:exon5:c.G1308A:p.L436L,ENSCAFG00000006293.4:ENSCAFT00000010207.4:exon4:c.G1476A:p.L492L,	ENSCAFG00000006293	NR3C1	NR3C1	chr2	38145655	38145655	C	T	-	0/1	24,8	0.32	32
3	nonsynonymous SNV	ENSCAFG00000004148.4:ENSCAFT00000006670.4:exon1:c.C149T:p.T50M,	ENSCAFG00000004148	RPN1	RPN1	chr20	2639818	2639818	G	A	deleterious(0)	0/1	23,3	0.143	26
3	nonsynonymous SNV	ENSCAFG00000010060.5:ENSCAFT00000015997.4:exon1:c.C50T:p.A17V,	ENSCAFG00000010060	RRP9	RRP9	chr20	37774590	37774590	C	T	tolerated(0.34)	0/1	6,3	0.333	9
3	synonymous SNV	ENSCAFG00000015590.4:ENSCAFT00000091816.1:exon8:c.C636T:p.H212H,ENSCAFG00000015590.4:ENSCAFT00000024724.4:exon8:c.C636T:p.H212H,ENSCAFG00000015590.4:ENSCAFT00000082827.1:exon8:c.C636T:p.H212H,ENSCAFG00000015590.4:ENSCAFT00000086746.1:exon8:c.C636T:p.H212H,ENSCAFG00000015590.4:ENSCAFT00000075543.1:exon8:c.C576T:p.H192H,ENSCAFG00000015590.4:ENSCAFT00000062453.1:exon8:c.C636T:p.H212H,ENSCAFG00000015…	ENSCAFG00000015590	CPAMD8	CPAMD8	chr20	45671677	45671677	C	T	-	0/1	52,5	0.098	57
3	nonsynonymous SNV	ENSCAFG00000011808.5:ENSCAFT00000018740.5:exon2:c.C2360T:p.T787M,ENSCAFG00000011808.5:ENSCAFT00000048827.2:exon2:c.C2483T:p.T828M,ENSCAFG00000011808.5:ENSCAFT00000080590.1:exon2:c.C2330T:p.T777M,	ENSCAFG00000011808	TSHZ2	TSHZ2	chr24	39172097	39172097	C	T	deleterious(0.01)	0/1	69,7	0.102	76
3	nonsynonymous SNV	ENSCAFG00000008198.5:ENSCAFT00000081908.1:exon38:c.G5275A:p.G1759S,ENSCAFG00000008198.5:ENSCAFT00000013047.4:exon38:c.G5050A:p.G1684S,ENSCAFG00000008198.5:ENSCAFT00000069815.1:exon39:c.G5128A:p.G1710S,ENSCAFG00000008198.5:ENSCAFT00000013053.5:exon39:c.G4768A:p.G1590S,	ENSCAFG00000008198	KIF13B	KIF13B	chr25	28480868	28480868	G	A	tolerated_low_confidence(0.23)	0|1	2,2	0.4	4
3	nonsynonymous SNV	ENSCAFG00000008198.5:ENSCAFT00000081908.1:exon38:c.G5276A:p.G1759D,ENSCAFG00000008198.5:ENSCAFT00000013047.4:exon38:c.G5051A:p.G1684D,ENSCAFG00000008198.5:ENSCAFT00000069815.1:exon39:c.G5129A:p.G1710D,ENSCAFG00000008198.5:ENSCAFT00000013053.5:exon39:c.G4769A:p.G1590D,	ENSCAFG00000008198	KIF13B	KIF13B	chr25	28480869	28480869	G	A	tolerated_low_confidence(0.21)	0|1	2,2	0.4	4
3	synonymous SNV	ENSCAFG00000010915.4:ENSCAFT00000017359.3:exon8:c.C732T:p.D244D,	ENSCAFG00000010915	FOXN4	FOXN4	chr26	17751415	17751415	C	T	-	0/1	45,8	0.158	53
3	synonymous SNV	ENSCAFG00000011758.4:ENSCAFT00000018680.4:exon1:c.G54C:p.L18L,	ENSCAFG00000011758	TPST2	TPST2	chr26	20212816	20212816	C	G	-	0/1	5,2	0.286	7
3	nonframeshift deletion	ENSCAFG00000006580.5:ENSCAFT00000010628.4:exon3:c.133_135del:p.45_45del,ENSCAFG00000006580.5:ENSCAFT00000010627.5:exon3:c.133_135del:p.45_45del,ENSCAFG00000006580.5:ENSCAFT00000087714.1:exon3:c.133_135del:p.45_45del,	ENSCAFG00000006580	HNRNPA1	HNRNPA1	chr27	1018831	1018853	TACCTGAAAGGTGAGCTCCCTGA	-	-	0/1	69,36	0.36	105
3	nonsynonymous SNV	ENSCAFG00000013596.4:ENSCAFT00000021549.4:exon1:c.A37C:p.S13R,	ENSCAFG00000013596	CD69	CD69	chr27	36197338	36197338	A	C	deleterious(0)	0/1	59,26	0.31	85
3	nonsynonymous SNV	ENSCAFG00000029130.2:ENSCAFT00000047671.2:exon1:c.C451T:p.R151C,	ENSCAFG00000029130	KAZALD1	KAZALD1	chr28	13742824	13742824	C	T	tolerated(0.17)	0/1	17,3	0.176	20
3	nonsynonymous SNV	ENSCAFG00000010155.5:ENSCAFT00000016131.4:exon11:c.G955A:p.D319N,	ENSCAFG00000010155	NFKB2	NFKB2	chr28	14906608	14906608	G	A	deleterious(0)	0/1	24,17	0.459	41
3	nonsynonymous SNV	ENSCAFG00000010628.5:ENSCAFT00000078800.1:exon5:c.C433T:p.R145W,ENSCAFG00000010628.5:ENSCAFT00000038014.3:exon5:c.C433T:p.R145W,ENSCAFG00000010628.5:ENSCAFT00000016900.5:exon5:c.C433T:p.R145W,	ENSCAFG00000010628	SORCS1	SORCS1	chr28	18736116	18736116	G	A	deleterious(0)	0/1	88,4	0.057	92
3	stopgain	ENSCAFG00000007344.5:ENSCAFT00000043735.3:exon6:c.C553T:p.R185X,ENSCAFG00000007344.5:ENSCAFT00000011750.4:exon6:c.C553T:p.R185X,ENSCAFG00000007344.5:ENSCAFT00000062089.1:exon6:c.C553T:p.R185X,	ENSCAFG00000007344	MYBL1	MYBL1	chr29	16174462	16174462	G	A	-	0/1	77,17	0.177	94
3	synonymous SNV	ENSCAFG00000007361.4:ENSCAFT00000011799.4:exon15:c.G1272C:p.P424P,ENSCAFG00000007361.4:ENSCAFT00000092858.1:exon14:c.G1146C:p.P382P,	ENSCAFG00000007361	EPB41L4A	EPB41L4A	chr3	651014	651014	G	C	-	0/1	48,26	0.364	74
3	nonsynonymous SNV	ENSCAFG00000009695.5:ENSCAFT00000043454.3:exon29:c.A3646G:p.T1216A,ENSCAFG00000009695.5:ENSCAFT00000015402.4:exon30:c.A3661G:p.T1221A,	ENSCAFG00000009695	MAPKBP1	MAPKBP1	chr30	8855172	8855172	A	G	tolerated(0.75)	0/1	78,4	0.048	82
3	nonsynonymous SNV	ENSCAFG00000017866.4:ENSCAFT00000028352.4:exon1:c.C207G:p.D69E,	ENSCAFG00000017866	ISLR	ISLR	chr30	37327434	37327434	C	G	tolerated(0.36)	0/1	50,18	0.26	68
3	nonsynonymous SNV	ENSCAFG00000018057.2:ENSCAFT00000063763.1:exon3:c.C221T:p.T74I,ENSCAFG00000018057.2:ENSCAFT00000028688.2:exon3:c.C437T:p.T146I,ENSCAFG00000018057.2:ENSCAFT00000092295.1:exon2:c.C662T:p.T221I,ENSCAFG00000018057.2:ENSCAFT00000063373.1:exon2:c.C218T:p.T73I,	ENSCAFG00000018057	LINGO1	LINGO1	chr30	38735552	38735552	C	T	deleterious(0.01)	0/1	55,11	0.173	66
3	synonymous SNV	ENSCAFG00000010769.4:ENSCAFT00000091885.1:exon15:c.T2136C:p.G712G,ENSCAFG00000010769.4:ENSCAFT00000060197.1:exon15:c.T2136C:p.G712G,ENSCAFG00000010769.4:ENSCAFT00000074665.1:exon14:c.T2049C:p.G683G,ENSCAFG00000010769.4:ENSCAFT00000017140.4:exon15:c.T2136C:p.G712G,ENSCAFG00000010769.4:ENSCAFT00000084028.1:exon14:c.T1965C:p.G655G,	ENSCAFG00000010769	MANBA	MANBA	chr32	24058838	24058838	A	G	-	0/1	9,4	0.248	13
3	nonsynonymous SNV	ENSCAFG00000014075.4:ENSCAFT00000022347.4:exon2:c.G1201T:p.V401L,	ENSCAFG00000014075	MB21D2	MB21D2	chr34	24413924	24413924	C	A	deleterious(0)	0/1	97,41	0.298	138
3	nonsynonymous SNV	ENSCAFG00000014786.5:ENSCAFT00000060181.1:exon7:c.C1948T:p.P650S,ENSCAFG00000014786.5:ENSCAFT00000063461.1:exon8:c.C2026T:p.P676S,ENSCAFG00000014786.5:ENSCAFT00000083230.1:exon9:c.C1648T:p.P550S,ENSCAFG00000014786.5:ENSCAFT00000062622.1:exon8:c.C1732T:p.P578S,ENSCAFG00000014786.5:ENSCAFT00000092183.1:exon7:c.C1927T:p.P643S,ENSCAFG00000014786.5:ENSCAFT00000023476.5:exon8:c.C2026T:p.P676S,ENSCAFG00…	ENSCAFG00000014786	PHC3	PHC3	chr34	34699021	34699021	G	A	deleterious(0)	0/1	122,40	0.252	162
3	synonymous SNV	ENSCAFG00000011682.6:ENSCAFT00000018545.6:exon7:c.C8982T:p.P2994P,	ENSCAFG00000011682	XIRP2	XIRP2	chr36	12223428	12223428	C	T	-	0/1	24,4	0.158	28
3	nonsynonymous SNV	ENSCAFG00000012736.4:ENSCAFT00000020199.4:exon1:c.C566T:p.S189L,ENSCAFG00000012736.4:ENSCAFT00000067716.1:exon1:c.C566T:p.S189L,	ENSCAFG00000012736	NIT1	NIT1	chr38	21355634	21355634	G	A	deleterious_low_confidence(0)	0/1	12,5	0.331	17
3	synonymous SNV	ENSCAFG00000019081.4:ENSCAFT00000030300.4:exon24:c.C2820G:p.P940P,ENSCAFG00000019081.4:ENSCAFT00000081262.1:exon25:c.C2910G:p.P970P,ENSCAFG00000019081.4:ENSCAFT00000090525.1:exon23:c.C2739G:p.P913P,ENSCAFG00000019081.4:ENSCAFT00000073884.1:exon22:c.C2580G:p.P860P,	ENSCAFG00000019081	MYO1-	MYO1-	chr4	86764516	86764516	C	G	-	0/1	47,11	0.195	58
3	nonsynonymous SNV	ENSCAFG00000009907.5:ENSCAFT00000015815.4:exon8:c.A958T:p.I320F,	ENSCAFG00000009907	NTM	NTM	chr5	2730976	2730976	T	A	deleterious_low_confidence(0.02)	0/1	29,3	0.124	32
3	stopgain	ENSCAFG00000015611.5:ENSCAFT00000089359.1:exon20:c.C2755T:p.Q919X,ENSCAFG00000015611.5:ENSCAFT00000074228.1:exon19:c.C2866T:p.Q956X,ENSCAFG00000015611.5:ENSCAFT00000024755.5:exon21:c.C2569T:p.Q857X,	ENSCAFG00000015611	KIF1C	KIF1C	chr5	31616018	31616018	G	A	-	0/1	53,4	0.077	57
3	synonymous SNV	ENSCAFG00000019545.5:ENSCAFT00000067586.1:exon26:c.G3852A:p.K1284K,ENSCAFG00000019545.5:ENSCAFT00000031086.5:exon25:c.G3198A:p.K1066K,ENSCAFG00000019545.5:ENSCAFT00000065958.1:exon26:c.G3852A:p.K1284K,ENSCAFG00000019545.5:ENSCAFT00000044104.2:exon25:c.G3690A:p.K1230K,	ENSCAFG00000019545	CHD5	CHD5	chr5	60042414	60042414	C	T	-	0/1	23,4	0.161	27
3	synonymous SNV	ENSCAFG00000029980.2:ENSCAFT00000048279.2:exon2:c.C307T:p.L103L,	ENSCAFG00000029980	C6H16orf91	C16orf91	chr6	39373610	39373610	C	T	-	0/1	18,3	0.158	21
3	nonsynonymous SNV	ENSCAFG00000019628.4:ENSCAFT00000093889.1:exon2:c.C185T:p.A62V,ENSCAFG00000019628.4:ENSCAFT00000076487.1:exon2:c.C164T:p.A55V,ENSCAFG00000019628.4:ENSCAFT00000031196.4:exon2:c.C185T:p.A62V,	ENSCAFG00000019628	JMJD8	JMJD8	chr6	39892199	39892199	C	T	tolerated(0.16)	0/1	13,3	0.214	16
3	nonsynonymous SNV	ENSCAFG00000019662.4:ENSCAFT00000031266.4:exon6:c.C758T:p.A253V,	ENSCAFG00000019662	PIGQ	PIGQ	chr6	39975884	39975884	G	A	deleterious(0)	0/1	23,6	0.208	29
3	synonymous SNV	ENSCAFG00000019703.4:ENSCAFT00000064558.1:exon19:c.C2610T:p.F870F,ENSCAFG00000019703.4:ENSCAFT00000080316.1:exon19:c.C2709T:p.F903F,ENSCAFG00000019703.4:ENSCAFT00000031344.4:exon18:c.C2517T:p.F839F,ENSCAFG00000019703.4:ENSCAFT00000067719.1:exon18:c.C2505T:p.F835F,	ENSCAFG00000019703	RHBDF1	RHBDF1	chr6	40413262	40413262	C	T	-	0/1	74,37	0.337	111
3	nonsynonymous SNV	ENSCAFG00000010670.4:ENSCAFT00000016964.3:exon4:c.C436T:p.P146S,	ENSCAFG00000010670	ZNF496	ZNF496	chr8	194316	194316	G	A	tolerated(0.54)	0/1	52,27	0.34	79
3	synonymous SNV	ENSCAFG00000011471.5:ENSCAFT00000018198.5:exon1:c.G801T:p.V267V,	ENSCAFG00000011471	PPP1R3E	PPP1R3E	chr8	3563724	3563724	C	A	-	0/1	13,3	0.2	16
3	synonymous SNV	ENSCAFG00000017929.3:ENSCAFT00000028454.3:exon1:c.G3045A:p.S1015S,	ENSCAFG00000017929	RTL1	RTL1	chr8	69103643	69103643	C	T	-	0/1	118,42	0.274	160
3	frameshift insertion	ENSCAFG00000018075.4:ENSCAFT00000028719.4:exon10:c.1067dupC:p.S356fs,ENSCAFG00000018075.4:ENSCAFT00000085506.1:exon7:c.818dupC:p.S273fs,ENSCAFG00000018075.4:ENSCAFT00000086511.1:exon9:c.992dupC:p.S331fs,	ENSCAFG00000018075	TRAF3	TRAF3	chr8	70788113	70788113	-	C	-	0/1	16,5	0.277	21
3	nonsynonymous SNV	ENSCAFG00000014600.5:ENSCAFT00000023190.5:exon16:c.G4714A:p.A1572T,ENSCAFG00000014600.5:ENSCAFT00000076152.1:exon16:c.G4714A:p.A1572T,ENSCAFG00000014600.5:ENSCAFT00000069987.1:exon16:c.G1564A:p.A522T,ENSCAFG00000014600.5:ENSCAFT00000043953.2:exon14:c.G4537A:p.A1513T,ENSCAFG00000014600.5:ENSCAFT00000071681.1:exon15:c.G4855A:p.A1619T,ENSCAFG00000014600.5:ENSCAFT00000065506.1:exon15:c.G4984A:p.A1662…	ENSCAFG00000014600	BRCA1	BRCA1	chr9	20004980	20004980	G	A	tolerated(0.08)	0/1	58,5	0.091	63
3	nonsynonymous SNV	ENSCAFG00000018268.4:ENSCAFT00000029024.4:exon3:c.C1358T:p.S453F,	ENSCAFG00000018268	SLFN14	SLFN14	chr9	38106648	38106648	C	T	deleterious(0.02)	0/1	76,17	0.174	93
3	nonsynonymous SNV	ENSCAFG00000020125.5:ENSCAFT00000036009.3:exon5:c.C964T:p.R322C,ENSCAFG00000020125.5:ENSCAFT00000093938.1:exon7:c.C892T:p.R298C,ENSCAFG00000020125.5:ENSCAFT00000073258.1:exon5:c.C964T:p.R322C,	ENSCAFG00000020125	STXBP1	CFAP157	chr9	55680094	55680094	G	A	deleterious(0)	0/1	10,3	0.273	13
4	frameshift deletion	ENSCAFG00000004858.4:ENSCAFT00000082880.1:exon2:c.2573_2595del:p.A858fs,	ENSCAFG00000004858	CIC	CIC	chr1	112102487	112102509	CGGCTGGGCCACGGCAGTCGGCG	-	-	0/1	23,13	0.404	36
4	frameshift deletion	ENSCAFG00000004858.4:ENSCAFT00000082880.1:exon2:c.1032_1059del:p.Q344fs,	ENSCAFG00000004858	CIC	CIC	chr1	112104023	112104050	GGGGGGTAGGGTACCCGCTGGCTCAGCC	-	-	0/1	11,15	0.579	26
4	synonymous SNV	ENSCAFG00000001460.4:ENSCAFT00000078387.1:exon19:c.C3396T:p.P1132P,ENSCAFG00000001460.4:ENSCAFT00000073546.1:exon18:c.C3387T:p.P1129P,ENSCAFG00000001460.4:ENSCAFT00000066900.1:exon18:c.C3090T:p.P1030P,ENSCAFG00000001460.4:ENSCAFT00000002280.4:exon17:c.C3360T:p.P1120P,ENSCAFG00000001460.4:ENSCAFT00000072335.1:exon12:c.C2133T:p.P711P,ENSCAFG00000001460.4:ENSCAFT00000078718.1:exon14:c.C3057T:p.P1019…	ENSCAFG00000001460	PTPRD	PTPRD	chr11	29257478	29257478	G	A	-	0/1	111,103	0.484	214
4	synonymous SNV	ENSCAFG00000000825.4:ENSCAFT00000001287.4:exon3:c.G387A:p.S129S,	ENSCAFG00000000825	SLC3-A8	SLC3-A8	chr13	16621542	16621542	G	A	-	0/1	114,51	0.304	165
4	synonymous SNV	ENSCAFG00000001533.4:ENSCAFT00000002392.4:exon1:c.G450A:p.P150P,	ENSCAFG00000001533	TSPAN33	TSPAN33	chr14	7577273	7577273	C	T	-	0/1	33,5	0.13	38
4	synonymous SNV	ENSCAFG00000003553.4:ENSCAFT00000081630.1:exon19:c.T2439C:p.P813P,ENSCAFG00000003553.4:ENSCAFT00000005713.4:exon19:c.T2385C:p.P795P,ENSCAFG00000003553.4:ENSCAFT00000079820.1:exon19:c.T2436C:p.P812P,ENSCAFG00000003553.4:ENSCAFT00000087623.1:exon17:c.T2829C:p.P943P,ENSCAFG00000003553.4:ENSCAFT00000069741.1:exon16:c.T2808C:p.P936P,ENSCAFG00000003553.4:ENSCAFT00000079865.1:exon16:c.T2808C:p.P936P,ENS…	ENSCAFG00000003553	CADPS2	CADPS2	chr14	60173195	60173195	A	G	-	0/1	25,4	0.123	29
4	nonsynonymous SNV	ENSCAFG00000024932.3:ENSCAFT00000038555.3:exon2:c.A1027G:p.R343G,	ENSCAFG00000024932	GJA9	GJA9	chr15	3863549	3863549	A	G	deleterious(0.02)	0/1	103,4	0.049	107
4	nonsynonymous SNV	ENSCAFG00000047541.1:ENSCAFT00000075423.1:exon43:c.G4963A:p.V1655M,ENSCAFG00000047541.1:ENSCAFT00000091824.1:exon42:c.G4828A:p.V1610M,	ENSCAFG00000047541	OTOGL	OTOGL	chr15	22722530	22722530	G	A	deleterious(0.05)	0/1	127,81	0.389	208
4	synonymous SNV	ENSCAFG00000030403.2:ENSCAFT00000044772.2:exon2:c.C160T:p.L54L,	ENSCAFG00000030403	LRAT	LRAT	chr15	52401280	52401280	C	T	-	0/1	33,25	0.422	58
4	nonsynonymous SNV	ENSCAFG00000029845.2:ENSCAFT00000047230.2:exon11:c.G2386T:p.V796L,	ENSCAFG00000029845	NOM1	NOM1	chr16	19490067	19490067	G	T	deleterious(0.02)	0|1	103,5	0.055	108
4	nonsynonymous SNV	ENSCAFG00000007455.4:ENSCAFT00000039726.3:exon3:c.G331A:p.A111T,	ENSCAFG00000007455	RCN1	AL-35-78.4	chr18	35380153	35380153	C	T	deleterious(0)	0/1	81,59	0.42	140
4	nonsynonymous SNV	ENSCAFG00000009989.4:ENSCAFT00000085746.1:exon14:c.T1241C:p.I414T,ENSCAFG00000009989.4:ENSCAFT00000063522.1:exon13:c.T1124C:p.I375T,ENSCAFG00000009989.4:ENSCAFT00000015898.4:exon13:c.T1124C:p.I375T,	ENSCAFG00000009989	BRSK2	BRSK2	chr18	45679099	45679099	T	C	tolerated(0.13)	0/1	7,3	0.298	10
4	nonsynonymous SNV	ENSCAFG00000005169.4:ENSCAFT00000075843.1:exon9:c.T820C:p.C274R,ENSCAFG00000005169.4:ENSCAFT00000078783.1:exon2:c.T88C:p.C30R,ENSCAFG00000005169.4:ENSCAFT00000008336.4:exon9:c.T844C:p.C282R,ENSCAFG00000005169.4:ENSCAFT00000093455.1:exon9:c.T820C:p.C274R,ENSCAFG00000005169.4:ENSCAFT00000090623.1:exon6:c.T442C:p.C148R,	ENSCAFG00000005169	PRKCQ	PRKCQ	chr2	29394941	29394941	T	C	deleterious(0)	0/1	21,4	0.158	25
4	nonsynonymous SNV	ENSCAFG00000015879.6:ENSCAFT00000047339.2:exon14:c.C1984T:p.L662F,ENSCAFG00000015879.6:ENSCAFT00000078348.1:exon13:c.C1879T:p.L627F,ENSCAFG00000015879.6:ENSCAFT00000025161.6:exon15:c.C1921T:p.L641F,ENSCAFG00000015879.6:ENSCAFT00000081845.1:exon10:c.C1495T:p.L499F,ENSCAFG00000015879.6:ENSCAFT00000075144.1:exon14:c.C2002T:p.L668F,	ENSCAFG00000015879	CROCC	CROCC	chr2	81247401	81247401	G	A	deleterious(0.01)	0/1	25,3	0.136	28
4	nonsynonymous SNV	ENSCAFG00000013392.4:ENSCAFT00000064752.1:exon7:c.A4859T:p.N1620I,ENSCAFG00000013392.4:ENSCAFT00000060515.1:exon7:c.A4859T:p.N1620I,ENSCAFG00000013392.4:ENSCAFT00000072365.1:exon7:c.A4859T:p.N1620I,ENSCAFG00000013392.4:ENSCAFT00000077709.1:exon7:c.A4859T:p.N1620I,ENSCAFG00000013392.4:ENSCAFT00000071377.1:exon7:c.A4859T:p.N1620I,ENSCAFG00000013392.4:ENSCAFT00000076367.1:exon7:c.A515T:p.N172I,ENSCA…	ENSCAFG00000013392	SETD2	SETD2	chr20	41722189	41722189	A	T	deleterious(0)	0/1	47,23	0.382	70
4	nonsynonymous SNV	ENSCAFG00000013517.4:ENSCAFT00000090253.1:exon18:c.C2549A:p.S850Y,ENSCAFG00000013517.4:ENSCAFT00000071581.1:exon17:c.C2465A:p.S822Y,ENSCAFG00000013517.4:ENSCAFT00000060390.1:exon18:c.C2549A:p.S850Y,ENSCAFG00000013517.4:ENSCAFT00000073077.1:exon18:c.C2549A:p.S850Y,ENSCAFG00000013517.4:ENSCAFT00000069983.1:exon17:c.C2456A:p.S819Y,ENSCAFG00000013517.4:ENSCAFT00000021501.4:exon16:c.C2384A:p.S795Y,ENS…	ENSCAFG00000013517	NBEAL2	NBEAL2	chr20	41818271	41818271	G	T	deleterious(0)	0/1	44,4	0.079	48
4	nonsynonymous SNV	ENSCAFG00000031353.2:ENSCAFT00000043275.2:exon4:c.G487A:p.V163I,	ENSCAFG00000031353	BST2	BST2	chr20	45385800	45385800	G	A	tolerated(0.22)	0/1	49,38	0.461	87
4	nonsynonymous SNV	ENSCAFG00000019414.5:ENSCAFT00000049949.3:exon8:c.G808A:p.A270T,	ENSCAFG00000019414	SF3A2	SF3A2	chr20	56790206	56790206	C	T	tolerated_low_confidence(0.45)	0/1	15,4	0.221	19
4	nonsynonymous SNV	ENSCAFG00000006288.2:ENSCAFT00000010178.2:exon1:c.C862T:p.R288W,	ENSCAFG00000006288	OR52AC1	-	chr21	28795900	28795900	G	A	deleterious(0.03)	0/1	120,4	0.041	124
4	nonsynonymous SNV	ENSCAFG00000010165.4:ENSCAFT00000016148.4:exon8:c.C1000T:p.P334S,ENSCAFG00000010165.4:ENSCAFT00000071761.1:exon8:c.C1000T:p.P334S,ENSCAFG00000010165.4:ENSCAFT00000068712.1:exon8:c.C1000T:p.P334S,	ENSCAFG00000010165	SLC5A12	SLC5A12	chr21	47444151	47444151	G	A	deleterious(0.01)	0/1	24,16	0.37	40
4	synonymous SNV	ENSCAFG00000029278.2:ENSCAFT00000049386.2:exon1:c.C735G:p.A245A,	ENSCAFG00000029278	SOX18	SOX18	chr24	47496236	47496236	G	C	-	0|1	5,4	0.429	9
4	nonsynonymous SNV	ENSCAFG00000029278.2:ENSCAFT00000049386.2:exon1:c.C732G:p.N244K,	ENSCAFG00000029278	SOX18	SOX18	chr24	47496239	47496239	G	C	deleterious_low_confidence(0)	0|1	5,4	0.429	9
4	nonsynonymous SNV	ENSCAFG00000013152.5:ENSCAFT00000043750.2:exon3:c.G22A:p.V8I,	ENSCAFG00000013152	D2HGDH	D2HGDH	chr25	51563937	51563937	G	A	tolerated(0.09)	0/1	23,28	0.541	51
4	nonsynonymous SNV	ENSCAFG00000006377.5:ENSCAFT00000010370.5:exon2:c.A925G:p.T309A,ENSCAFG00000006377.5:ENSCAFT00000068745.1:exon3:c.A925G:p.T309A,ENSCAFG00000006377.5:ENSCAFT00000010365.4:exon2:c.A925G:p.T309A,ENSCAFG00000006377.5:ENSCAFT00000070662.1:exon3:c.A925G:p.T309A,ENSCAFG00000006377.5:ENSCAFT00000068790.1:exon3:c.A925G:p.T309A,	ENSCAFG00000006377	EP4--	EP4--	chr26	938985	938985	T	C	tolerated(0.07)	0/1	47,4	0.068	51
4	nonsynonymous SNV	ENSCAFG00000013288.4:ENSCAFT00000021096.4:exon18:c.G2307C:p.E769D,ENSCAFG00000013288.4:ENSCAFT00000063932.1:exon17:c.G2325C:p.E775D,ENSCAFG00000013288.4:ENSCAFT00000090522.1:exon17:c.G2265C:p.E755D,	ENSCAFG00000013288	ADAMTSL3	ADAMTSL3	chr3	55604587	55604587	G	C	tolerated(0.19)	0|1	131,5	0.047	136
4	nonsynonymous SNV	ENSCAFG00000008687.5:ENSCAFT00000013841.5:exon8:c.A883G:p.R295G,ENSCAFG00000008687.5:ENSCAFT00000075929.1:exon6:c.A721G:p.R241G,ENSCAFG00000008687.5:ENSCAFT00000075835.1:exon8:c.A1408G:p.R470G,ENSCAFG00000008687.5:ENSCAFT00000046887.2:exon8:c.A1408G:p.R470G,	ENSCAFG00000008687	CCT8	CCT8	chr31	24066762	24066762	T	C	deleterious(0)	0/1	104,7	0.057	111
4	nonsynonymous SNV	ENSCAFG00000014726.5:ENSCAFT00000023388.4:exon2:c.G350A:p.R117H,	ENSCAFG00000014726	LRRIQ4	LRRIQ4	chr34	34429050	34429050	G	A	tolerated(0.18)	0/1	91,4	0.053	95
4	nonsynonymous SNV	ENSCAFG00000010034.5:ENSCAFT00000015962.4:exon25:c.C3313T:p.P1105S,	ENSCAFG00000010034	RYR2	RYR2	chr4	2631746	2631746	G	A	-	0/1	60,5	0.077	65
4	nonsynonymous SNV	ENSCAFG00000018275.5:ENSCAFT00000068466.1:exon5:c.C1645T:p.R549W,ENSCAFG00000018275.5:ENSCAFT00000029039.5:exon4:c.C1471T:p.R491W,	ENSCAFG00000018275	PPARGC1B	PPARGC1B	chr4	59187517	59187517	G	A	deleterious(0.03)	0/1	45,44	0.493	89
4	synonymous SNV	ENSCAFG00000019405.5:ENSCAFT00000047332.3:exon12:c.C1653T:p.S551S,ENSCAFG00000019405.5:ENSCAFT00000030855.5:exon13:c.C1698T:p.S566S,	ENSCAFG00000019405	PLCH2	PLCH2	chr5	57359845	57359845	C	T	-	0/1	21,26	0.563	47
4	nonsynonymous SNV	ENSCAFG00000020031.4:ENSCAFT00000072058.1:exon6:c.G602A:p.R201H,ENSCAFG00000020031.4:ENSCAFT00000081023.1:exon9:c.G1142A:p.R381H,	ENSCAFG00000020031	WWOX	WWOX	chr5	72299260	72299260	C	T	tolerated(0.54)	0/1	33,46	0.56	79
4	nonsynonymous SNV	ENSCAFG00000020252.4:ENSCAFT00000059905.1:exon2:c.G241A:p.D81N,ENSCAFG00000020252.4:ENSCAFT00000032259.3:exon2:c.G241A:p.D81N,ENSCAFG00000020252.4:ENSCAFT00000079469.1:exon2:c.G241A:p.D81N,ENSCAFG00000020252.4:ENSCAFT00000089498.1:exon2:c.G241A:p.D81N,	ENSCAFG00000020252	NQO1	NQO1	chr5	79986390	79986390	G	A	deleterious(0)	0/1	8,3	0.333	11
4	nonsynonymous SNV	ENSCAFG00000020062.4:ENSCAFT00000063022.1:exon10:c.G949A:p.V317M,ENSCAFG00000020062.4:ENSCAFT00000090512.1:exon8:c.G835A:p.V279M,ENSCAFG00000020062.4:ENSCAFT00000086283.1:exon9:c.G997A:p.V333M,ENSCAFG00000020062.4:ENSCAFT00000078643.1:exon9:c.G997A:p.V333M,ENSCAFG00000020062.4:ENSCAFT00000031930.4:exon9:c.G997A:p.V333M,ENSCAFG00000020062.4:ENSCAFT00000086874.1:exon9:c.G997A:p.V333M,	ENSCAFG00000020062	DPYD	DPYD	chr6	52115394	52115394	G	A	deleterious(0)	0/1	69,56	0.484	125
4	nonsynonymous SNV	ENSCAFG00000011552.5:ENSCAFT00000062045.1:exon20:c.G5990A:p.R1997H,ENSCAFG00000011552.5:ENSCAFT00000061101.1:exon20:c.G6239A:p.R2080H,ENSCAFG00000011552.5:ENSCAFT00000079507.1:exon19:c.G6077A:p.R2026H,ENSCAFG00000011552.5:ENSCAFT00000078285.1:exon18:c.G5612A:p.R1871H,ENSCAFG00000011552.5:ENSCAFT00000018361.4:exon19:c.G6050A:p.R2017H,ENSCAFG00000011552.5:ENSCAFT00000083805.1:exon19:c.G6050A:p.R201…	ENSCAFG00000011552	BPTF	BPTF	chr9	12629332	12629332	C	T	deleterious(0.02)	0/1	132,5	0.04	137
4	nonsynonymous SNV	ENSCAFG00000031250.2:ENSCAFT00000060107.1:exon4:c.G901A:p.E301K,ENSCAFG00000031250.2:ENSCAFT00000045221.2:exon4:c.G868A:p.E290K,	ENSCAFG00000031250	KRT14	KRT16	chr9	21263664	21263664	G	A	deleterious(0)	0/1	69,51	0.434	120
4	nonsynonymous SNV	ENSCAFG00000017647.4:ENSCAFT00000028003.4:exon8:c.G1199A:p.R400Q,ENSCAFG00000017647.4:ENSCAFT00000083253.1:exon8:c.G1211A:p.R404Q,	ENSCAFG00000017647	CLTC	CLTC	chr9	34153409	34153409	G	A	tolerated(0.27)	0|1	71,49	0.384	120
4	nonsynonymous SNV	ENSCAFG00000014251.6:ENSCAFT00000086773.1:exon10:c.G973A:p.G325R,ENSCAFG00000014251.6:ENSCAFT00000061818.1:exon8:c.G751A:p.G251R,ENSCAFG00000014251.6:ENSCAFT00000045177.3:exon10:c.G973A:p.G325R,ENSCAFG00000014251.6:ENSCAFT00000092867.1:exon9:c.G874A:p.G292R,ENSCAFG00000014251.6:ENSCAFT00000022643.5:exon9:c.G925A:p.G309R,ENSCAFG00000014251.6:ENSCAFT00000061362.1:exon10:c.G973A:p.G325R,	ENSCAFG00000014251	DDX3X	DDX3X	chrX	35769830	35769830	G	A	deleterious(0)	0/1	41,36	0.484	77
5	nonsynonymous SNV	ENSCAFG00000001101.5:ENSCAFT00000073741.1:exon10:c.C1855T:p.P619S,ENSCAFG00000001101.5:ENSCAFT00000076288.1:exon10:c.C1855T:p.P619S,ENSCAFG00000001101.5:ENSCAFT00000061187.1:exon7:c.C1195T:p.P399S,ENSCAFG00000001101.5:ENSCAFT00000001685.5:exon10:c.C1552T:p.P518S,ENSCAFG00000001101.5:ENSCAFT00000086428.1:exon10:c.C1699T:p.P567S,ENSCAFG00000001101.5:ENSCAFT00000077068.1:exon10:c.C1855T:p.P619S,ENSC…	ENSCAFG00000001101	PTPRK	PTPRK	chr1	66715371	66715371	G	A	deleterious(0)	0/1	56,5	0.093	61
5	nonsynonymous SNV	ENSCAFG00000005014.5:ENSCAFT00000008059.3:exon1:c.G121A:p.V41M,	ENSCAFG00000005014	TGFB1	TGFB1	chr1	112629641	112629641	G	A	tolerated(0.08)	0/1	26,12	0.355	38
5	synonymous SNV	ENSCAFG00000005014.5:ENSCAFT00000008059.3:exon1:c.G303A:p.A101A,	ENSCAFG00000005014	TGFB1	TGFB1	chr1	112629823	112629823	G	A	-	0/1	13,19	0.542	32
5	nonsynonymous SNV	ENSCAFG00000005606.5:ENSCAFT00000077322.1:exon7:c.C1858T:p.R620C,ENSCAFG00000005606.5:ENSCAFT00000009039.5:exon8:c.C1666T:p.R556C,	ENSCAFG00000005606	PAK4	PAK4	chr1	114009892	114009892	G	A	deleterious(0)	0/1	13,6	0.353	19
5	nonsynonymous SNV	ENSCAFG00000000439.4:ENSCAFT00000000698.4:exon15:c.G1844T:p.R615I,ENSCAFG00000000439.4:ENSCAFT00000087732.1:exon15:c.G1844T:p.R615I,	ENSCAFG00000000439	MYRFL	MYRFL	chr10	11831748	11831748	G	T	tolerated(0.06)	0/1	41,4	0.083	45
5	nonsynonymous SNV	ENSCAFG00000001511.4:ENSCAFT00000002356.4:exon10:c.T1514A:p.V505D,	ENSCAFG00000001511	IL2RB	IL2RB	chr10	27386444	27386444	T	A	tolerated(0.36)	0/1	49,15	0.245	64
5	nonsynonymous SNV	ENSCAFG00000000851.3:ENSCAFT00000082208.1:exon1:c.G185A:p.S62N,ENSCAFG00000000851.3:ENSCAFT00000001334.3:exon1:c.G185A:p.S62N,	ENSCAFG00000000851	IRF1	IRF1	chr11	20781023	20781023	C	T	deleterious_low_confidence(0.05)	0/1	18,13	0.431	31
5	synonymous SNV	ENSCAFG00000002774.5:ENSCAFT00000071691.1:exon11:c.G6951A:p.L2317L,ENSCAFG00000002774.5:ENSCAFT00000004432.5:exon10:c.G6873A:p.L2291L,ENSCAFG00000002774.5:ENSCAFT00000063727.1:exon11:c.G6951A:p.L2317L,ENSCAFG00000002774.5:ENSCAFT00000080876.1:exon8:c.G6468A:p.L2156L,ENSCAFG00000002774.5:ENSCAFT00000063772.1:exon10:c.G6873A:p.L2291L,	ENSCAFG00000002774	ZNF462	ZNF462	chr11	62511524	62511524	G	A	-	0/1	90,54	0.398	144
5	synonymous SNV	ENSCAFG00000001571.4:ENSCAFT00000072816.1:exon3:c.G1815A:p.P605P,ENSCAFG00000001571.4:ENSCAFT00000078880.1:exon3:c.G1695A:p.P565P,ENSCAFG00000001571.4:ENSCAFT00000002460.4:exon4:c.G1695A:p.P565P,ENSCAFG00000001571.4:ENSCAFT00000044697.2:exon3:c.G1776A:p.P592P,	ENSCAFG00000001571	LRFN2	LRFN2	chr12	9209830	9209830	C	T	-	0/1	33,15	0.309	48
5	nonsynonymous SNV	ENSCAFG00000001242.4:ENSCAFT00000001931.4:exon1:c.T577C:p.S193P,	ENSCAFG00000001242	OR2AV1	-	chr14	1994291	1994291	T	C	deleterious(0)	0/1	382,224	0.361	606
5	nonsynonymous SNV	ENSCAFG00000006923.4:ENSCAFT00000063410.1:exon21:c.A1976T:p.Q659L,ENSCAFG00000006923.4:ENSCAFT00000088413.1:exon23:c.A2552T:p.Q851L,ENSCAFG00000006923.4:ENSCAFT00000011119.4:exon22:c.A2081T:p.Q694L,	ENSCAFG00000006923	ANO4	ANO4	chr15	40112451	40112451	A	T	deleterious(0)	0|1	119,4	0.047	123
5	nonsynonymous SNV	ENSCAFG00000004006.5:ENSCAFT00000006428.4:exon3:c.C839T:p.T280M,ENSCAFG00000004006.5:ENSCAFT00000085062.1:exon3:c.C839T:p.T280M,ENSCAFG00000004006.5:ENSCAFT00000081004.1:exon6:c.C743T:p.T248M,ENSCAFG00000004006.5:ENSCAFT00000068021.1:exon6:c.C743T:p.T248M,ENSCAFG00000004006.5:ENSCAFT00000068049.1:exon6:c.C743T:p.T248M,ENSCAFG00000004006.5:ENSCAFT00000090380.1:exon6:c.C1004T:p.T335M,ENSCAFG0000000…	ENSCAFG00000004006	SVIL	SVIL	chr2	16087613	16087613	G	A	tolerated_low_confidence(0.06)	0/1	22,15	0.414	37
5	synonymous SNV	ENSCAFG00000015610.4:ENSCAFT00000024745.4:exon2:c.C1047A:p.S349S,	ENSCAFG00000015610	ACTL8	ACTL8	chr2	80560897	80560897	G	T	-	0/1	107,5	0.058	112
5	nonsynonymous SNV	ENSCAFG00000015590.4:ENSCAFT00000024724.4:exon2:c.T163C:p.S55P,ENSCAFG00000015590.4:ENSCAFT00000082827.1:exon2:c.T163C:p.S55P,ENSCAFG00000015590.4:ENSCAFT00000086746.1:exon2:c.T163C:p.S55P,ENSCAFG00000015590.4:ENSCAFT00000075543.1:exon2:c.T103C:p.S35P,ENSCAFG00000015590.4:ENSCAFT00000091816.1:exon2:c.T163C:p.S55P,ENSCAFG00000015590.4:ENSCAFT00000062453.1:exon2:c.T163C:p.S55P,ENSCAFG00000015590.4:…	ENSCAFG00000015590	CPAMD8	CPAMD8	chr20	45664620	45664620	T	C	tolerated(0.21)	0/1	165,5	0.042	170
5	nonsynonymous SNV	ENSCAFG00000019722.5:ENSCAFT00000031358.5:exon4:c.G637A:p.A213T,ENSCAFG00000019722.5:ENSCAFT00000066947.1:exon3:c.G529A:p.A177T,	ENSCAFG00000019722	ODF3L2	ODF3L2	chr20	57998808	57998808	G	A	deleterious(0.01)	0/1	26,4	0.117	30
5	nonsynonymous SNV	ENSCAFG00000015553.4:ENSCAFT00000024645.4:exon3:c.C326T:p.S109L,	ENSCAFG00000015553	DKK1	DKK1	chr26	35698678	35698678	G	A	tolerated_low_confidence(0.14)	0/1	30,26	0.489	56
5	nonsynonymous SNV	ENSCAFG00000007105.4:ENSCAFT00000076029.1:exon20:c.A2428G:p.T810A,ENSCAFG00000007105.4:ENSCAFT00000011380.4:exon19:c.A2623G:p.T875A,	ENSCAFG00000007105	TNS2	TNS2	chr27	2099684	2099684	T	C	deleterious(0)	0/1	13,4	0.216	17
5	nonsynonymous SNV	ENSCAFG00000007311.3:ENSCAFT00000011685.3:exon1:c.G25A:p.G9S,	ENSCAFG00000007311	-	KRT81	chr27	2746277	2746277	G	A	tolerated(0.41)	0/1	21,16	0.464	37
5	synonymous SNV	ENSCAFG00000015289.1:ENSCAFT00000024280.1:exon1:c.C723T:p.F241F,	ENSCAFG00000015289	KCNA1	KCNA1	chr27	39934590	39934590	G	A	-	0/1	150,92	0.391	242
5	synonymous SNV	ENSCAFG00000015799.4:ENSCAFT00000025064.4:exon1:c.C279A:p.G93G,	ENSCAFG00000015799	CRMP1	CRMP1	chr3	71081938	71081938	G	T	-	0/1	4,5	0.6	9
5	nonsynonymous SNV	ENSCAFG00000014786.5:ENSCAFT00000083230.1:exon9:c.C1649G:p.P550R,ENSCAFG00000014786.5:ENSCAFT00000062622.1:exon8:c.C1733G:p.P578R,ENSCAFG00000014786.5:ENSCAFT00000092183.1:exon7:c.C1928G:p.P643R,ENSCAFG00000014786.5:ENSCAFT00000023476.5:exon8:c.C2027G:p.P676R,ENSCAFG00000014786.5:ENSCAFT00000083027.1:exon6:c.C1769G:p.P590R,ENSCAFG00000014786.5:ENSCAFT00000079588.1:exon8:c.C2027G:p.P676R,ENSCAFG00…	ENSCAFG00000014786	PHC3	PHC3	chr34	34699020	34699020	G	C	deleterious(0)	0/1	112,103	0.503	215
5	synonymous SNV	ENSCAFG00000009675.3:ENSCAFT00000015370.3:exon1:c.A1407C:p.R469R,	ENSCAFG00000009675	LRRN2	LRRN2	chr38	1165396	1165396	T	G	-	0/1	85,6	0.094	91
5	synonymous SNV	ENSCAFG00000013422.4:ENSCAFT00000021314.4:exon10:c.C1392T:p.N464N,ENSCAFG00000013422.4:ENSCAFT00000083739.1:exon10:c.C1269T:p.N423N,	ENSCAFG00000013422	ALDH9A1	-	chr38	17660723	17660723	C	T	-	0/1	18,28	0.572	46
5	nonsynonymous SNV	ENSCAFG00000014847.4:ENSCAFT00000023558.4:exon4:c.T2746C:p.F916L,	ENSCAFG00000014847	SYNPO2L	SYNPO2L	chr4	24170186	24170186	A	G	tolerated(0.22)	0/1	203,6	0.04	209
5	nonsynonymous SNV	ENSCAFG00000019870.5:ENSCAFT00000031623.5:exon2:c.A356G:p.D119G,ENSCAFG00000019870.5:ENSCAFT00000031621.4:exon2:c.A356G:p.D119G,	ENSCAFG00000019870	PIEZO1	PIEZO1	chr5	64584404	64584404	A	G	tolerated_low_confidence(0.44)	0/1	23,4	0.158	27
5	nonsynonymous SNV	ENSCAFG00000016192.5:ENSCAFT00000068539.1:exon21:c.G2959A:p.V987M,ENSCAFG00000016192.5:ENSCAFT00000066304.1:exon24:c.G3538A:p.V1180M,ENSCAFG00000016192.5:ENSCAFT00000025755.5:exon25:c.G3538A:p.V1180M,ENSCAFG00000016192.5:ENSCAFT00000064877.1:exon25:c.G3556A:p.V1186M,	ENSCAFG00000016192	SDK1	SDK1	chr6	13247694	13247694	C	T	deleterious(0.03)	0/1	81,37	0.345	118
5	nonsynonymous SNV	ENSCAFG00000024473.4:ENSCAFT00000082109.1:exon9:c.C2104T:p.R702C,ENSCAFG00000024473.4:ENSCAFT00000069243.1:exon9:c.C2257T:p.R753C,ENSCAFG00000024473.4:ENSCAFT00000037775.4:exon10:c.C2353T:p.R785C,ENSCAFG00000024473.4:ENSCAFT00000048060.2:exon9:c.C2320T:p.R774C,	ENSCAFG00000024473	MEFV	MEFV	chr6	37983513	37983513	C	T	tolerated(0.09)	0/1	195,9	0.054	204
5	nonsynonymous SNV	ENSCAFG00000019687.4:ENSCAFT00000060455.1:exon5:c.G434A:p.G145D,ENSCAFG00000019687.4:ENSCAFT00000031302.4:exon5:c.G431A:p.G144D,ENSCAFG00000019687.4:ENSCAFT00000089506.1:exon5:c.G431A:p.G144D,	ENSCAFG00000019687	FAM234A	FAM234A	chr6	40239661	40239661	C	T	deleterious(0)	0/1	16,4	0.186	20
5	nonsynonymous SNV	ENSCAFG00000020340.5:ENSCAFT00000081735.1:exon1:c.C128T:p.A43V,ENSCAFG00000020340.5:ENSCAFT00000032396.5:exon1:c.C128T:p.A43V,ENSCAFG00000020340.5:ENSCAFT00000066832.1:exon1:c.C128T:p.A43V,ENSCAFG00000020340.5:ENSCAFT00000032397.4:exon1:c.C128T:p.A43V,	ENSCAFG00000020340	ADGRL4	ADGRL4	chr6	68078373	68078373	C	T	-	0/1	3,11	0.692	14
5	synonymous SNV	ENSCAFG00000028548.2:ENSCAFT00000038055.3:exon2:c.C240T:p.N80N,	ENSCAFG00000028548	-	-	chr8	2323417	2323417	C	T	-	0/1	23,6	0.159	29
5	stopgain	ENSCAFG00000018075.4:ENSCAFT00000028719.4:exon10:c.C961T:p.R321X,ENSCAFG00000018075.4:ENSCAFT00000085506.1:exon7:c.C712T:p.R238X,ENSCAFG00000018075.4:ENSCAFT00000086511.1:exon9:c.C886T:p.R296X,	ENSCAFG00000018075	TRAF3	TRAF3	chr8	70788008	70788008	C	T	-	0/1	11,10	0.5	21
5	nonsynonymous SNV	ENSCAFG00000018075.4:ENSCAFT00000028719.4:exon11:c.G1598A:p.G533D,ENSCAFG00000018075.4:ENSCAFT00000085506.1:exon8:c.G1349A:p.G450D,ENSCAFG00000018075.4:ENSCAFT00000086511.1:exon10:c.G1523A:p.G508D,	ENSCAFG00000018075	TRAF3	TRAF3	chr8	70789536	70789536	G	A	deleterious(0)	0/1	74,62	0.46	136
5	synonymous SNV	ENSCAFG00000046771.1:ENSCAFT00000077325.1:exon2:c.C243T:p.F81F,	ENSCAFG00000046771	-	IGHV4-4	chr8	73028520	73028520	G	A	-	0/1	35,105	0.768	140
5	synonymous SNV	ENSCAFG00000046771.1:ENSCAFT00000077325.1:exon2:c.C150T:p.S50S,	ENSCAFG00000046771	-	IGHV4-4	chr8	73028613	73028613	G	A	-	0/1	21,52	0.684	73
5	nonsynonymous SNV	ENSCAFG00000016060.5:ENSCAFT00000079126.1:exon6:c.G890A:p.R297Q,ENSCAFG00000016060.5:ENSCAFT00000035664.4:exon8:c.G1064A:p.R355Q,ENSCAFG00000016060.5:ENSCAFT00000011311.4:exon9:c.G1181A:p.R394Q,	ENSCAFG00000016060	RARA	RARA	chr9	22255569	22255569	C	T	deleterious(0.02)	0/1	14,9	0.366	23
5	nonsynonymous SNV	ENSCAFG00000011251.4:ENSCAFT00000017887.4:exon6:c.C1049G:p.P350R,ENSCAFG00000011251.4:ENSCAFT00000076682.1:exon7:c.C1109G:p.P370R,	ENSCAFG00000011251	-	NLGN4Y	chrX	3422587	3422587	G	C	deleterious(0)	0/1	178,10	0.047	188
5	nonsynonymous SNV	ENSCAFG00000013351.4:ENSCAFT00000085343.1:exon1:c.G53T:p.G18V,ENSCAFG00000013351.4:ENSCAFT00000084402.1:exon1:c.G53T:p.G18V,ENSCAFG00000013351.4:ENSCAFT00000081084.1:exon1:c.G53T:p.G18V,ENSCAFG00000013351.4:ENSCAFT00000021196.4:exon1:c.G53T:p.G18V,	ENSCAFG00000013351	PTCHD1	PTCHD1	chrX	19096888	19096888	G	T	deleterious(0)	0/1	24,4	0.142	28
5	synonymous SNV	ENSCAFG00000014251.6:ENSCAFT00000086773.1:exon10:c.G984T:p.V328V,ENSCAFG00000014251.6:ENSCAFT00000061818.1:exon8:c.G762T:p.V254V,ENSCAFG00000014251.6:ENSCAFT00000045177.3:exon10:c.G984T:p.V328V,ENSCAFG00000014251.6:ENSCAFT00000092867.1:exon9:c.G885T:p.V295V,ENSCAFG00000014251.6:ENSCAFT00000022643.5:exon9:c.G936T:p.V312V,ENSCAFG00000014251.6:ENSCAFT00000061362.1:exon10:c.G984T:p.V328V,	ENSCAFG00000014251	DDX3X	DDX3X	chrX	35769841	35769841	G	T	-	0|1	26,41	0.6	67
5	nonsynonymous SNV	ENSCAFG00000014251.6:ENSCAFT00000086773.1:exon10:c.A986G:p.D329G,ENSCAFG00000014251.6:ENSCAFT00000061818.1:exon8:c.A764G:p.D255G,ENSCAFG00000014251.6:ENSCAFT00000045177.3:exon10:c.A986G:p.D329G,ENSCAFG00000014251.6:ENSCAFT00000092867.1:exon9:c.A887G:p.D296G,ENSCAFG00000014251.6:ENSCAFT00000022643.5:exon9:c.A938G:p.D313G,ENSCAFG00000014251.6:ENSCAFT00000061362.1:exon10:c.A986G:p.D329G,	ENSCAFG00000014251	DDX3X	DDX3X	chrX	35769843	35769843	A	G	deleterious(0)	0|1	26,41	0.6	67
5	frameshift deletion	ENSCAFG00000014451.4:ENSCAFT00000022963.4:exon6:c.536delA:p.E179fs,ENSCAFG00000014451.4:ENSCAFT00000090481.1:exon5:c.398delA:p.E133fs,ENSCAFG00000014451.4:ENSCAFT00000074678.1:exon6:c.506delA:p.E169fs,ENSCAFG00000014451.4:ENSCAFT00000092821.1:exon6:c.536delA:p.E179fs,	ENSCAFG00000014451	MAOB	MAOB	chrX	37794655	37794655	T	-	-	0|1	27,5	0.216	32
5	frameshift insertion	ENSCAFG00000014451.4:ENSCAFT00000022963.4:exon6:c.531_532insT:p.H178fs,ENSCAFG00000014451.4:ENSCAFT00000090481.1:exon5:c.393_394insT:p.H132fs,ENSCAFG00000014451.4:ENSCAFT00000074678.1:exon6:c.501_502insT:p.H168fs,ENSCAFG00000014451.4:ENSCAFT00000092821.1:exon6:c.531_532insT:p.H178fs,	ENSCAFG00000014451	MAOB	MAOB	chrX	37794659	37794659	-	A	-	0|1	25,5	0.216	30
5	synonymous SNV	ENSCAFG00000016972.6:ENSCAFT00000043907.3:exon44:c.G6201A:p.Q2067Q,ENSCAFG00000016972.6:ENSCAFT00000080349.1:exon42:c.G6216A:p.Q2072Q,ENSCAFG00000016972.6:ENSCAFT00000026889.5:exon43:c.G6267A:p.Q2089Q,	ENSCAFG00000016972	MED12	MED12	chrX	55507740	55507740	G	A	-	0/1	21,4	0.135	25
6	nonsynonymous SNV	ENSCAFG00000000009.4:ENSCAFT00000000011.4:exon7:c.C635T:p.A212V,	ENSCAFG00000000009	SLC66A2	-	chr1	800746	800746	C	T	deleterious(0.04)	0/1	86,4	0.047	90
6	nonsynonymous SNV	ENSCAFG00000000022.4:ENSCAFT00000088916.1:exon1:c.C821T:p.A274V,ENSCAFG00000000022.4:ENSCAFT00000000037.4:exon2:c.C686T:p.A229V,	ENSCAFG00000000022	ZNF4-7	ZNF4-7	chr1	4839012	4839012	G	A	tolerated(0.09)	0/1	68,4	0.054	72
6	synonymous SNV	ENSCAFG00000005981.4:ENSCAFT00000009654.4:exon7:c.T4965C:p.N1655N,	ENSCAFG00000005981	WDR87	WDR87	chr1	115015915	115015915	T	C	-	0/1	20,15	0.444	35
6	nonsynonymous SNV	ENSCAFG00000000060.5:ENSCAFT00000087392.1:exon14:c.C2011T:p.R671W,ENSCAFG00000000060.5:ENSCAFT00000000090.4:exon14:c.C2011T:p.R671W,ENSCAFG00000000060.5:ENSCAFT00000064399.1:exon13:c.C1891T:p.R631W,ENSCAFG00000000060.5:ENSCAFT00000085105.1:exon14:c.C2011T:p.R671W,ENSCAFG00000000060.5:ENSCAFT00000000089.4:exon13:c.C1879T:p.R627W,	ENSCAFG00000000060	ITGA7	ITGA7	chr10	100095	100095	G	A	tolerated(0.06)	0/1	31,3	0.136	34
6	synonymous SNV	ENSCAFG00000000287.5:ENSCAFT00000000446.5:exon3:c.C480T:p.D160D,	ENSCAFG00000000287	CYP27B1	CYP27B1	chr10	1828447	1828447	G	A	-	0/1	18,3	0.176	21
6	nonsynonymous SNV	ENSCAFG00000000785.4:ENSCAFT00000001220.4:exon1:c.C5599G:p.P1867A,	ENSCAFG00000000785	PKDREJ	PKDREJ	chr10	19920319	19920319	C	G	deleterious(0.01)	0/1	79,53	0.429	132
6	nonsynonymous SNV	ENSCAFG00000003008.5:ENSCAFT00000044041.3:exon14:c.C1865T:p.P622L,ENSCAFG00000003008.5:ENSCAFT00000037679.4:exon14:c.C1865T:p.P622L,ENSCAFG00000003008.5:ENSCAFT00000037683.4:exon14:c.C1865T:p.P622L,	ENSCAFG00000003008	SHOC1	SHOC1	chr11	66320184	66320184	G	A	tolerated(0.09)	0/1	25,13	0.345	38
6	nonsynonymous SNV	ENSCAFG00000000487.5:ENSCAFT00000000779.5:exon5:c.C902T:p.S301F,ENSCAFG00000000487.5:ENSCAFT00000000775.4:exon5:c.C902T:p.S301F,	ENSCAFG00000000487	DLA88	HLA-F	chr12	893676	893676	G	A	deleterious_low_confidence(0.01)	0/1	234,61	0.208	295
6	nonsynonymous SNV	ENSCAFG00000001941.4:ENSCAFT00000087767.1:exon14:c.T1366C:p.Y456H,ENSCAFG00000001941.4:ENSCAFT00000064691.1:exon15:c.T1408C:p.Y470H,ENSCAFG00000001941.4:ENSCAFT00000003068.4:exon15:c.T1408C:p.Y470H,ENSCAFG00000001941.4:ENSCAFT00000090807.1:exon14:c.T1327C:p.Y443H,	ENSCAFG00000001941	TMEM63B	TMEM63B	chr12	12568594	12568594	T	C	tolerated(0.17)	0/1	93,4	0.043	97
6	nonsynonymous SNV	ENSCAFG00000002562.5:ENSCAFT00000004046.5:exon9:c.G929C:p.G310A,	ENSCAFG00000002562	COL19A1	COL19A1	chr12	32509894	32509894	G	C	deleterious(0.03)	0/1	27,18	0.4	45
6	synonymous SNV	ENSCAFG00000003653.5:ENSCAFT00000005904.5:exon10:c.C1257T:p.I419I,ENSCAFG00000003653.5:ENSCAFT00000005896.4:exon10:c.C1509T:p.I503I,	ENSCAFG00000003653	PREP	PREP	chr12	62755930	62755930	G	A	-	0/1	86,24	0.226	110
6	nonsynonymous SNV	ENSCAFG00000001097.5:ENSCAFT00000082756.1:exon1:c.T914C:p.V305A,ENSCAFG00000001097.5:ENSCAFT00000072253.1:exon1:c.T914C:p.V305A,ENSCAFG00000001097.5:ENSCAFT00000079947.1:exon1:c.T914C:p.V305A,ENSCAFG00000001097.5:ENSCAFT00000001672.5:exon1:c.T914C:p.V305A,	ENSCAFG00000001097	ADCY8	ADCY8	chr13	27936821	27936821	A	G	tolerated(0.06)	0/1	46,4	0.079	50
6	nonsynonymous SNV	ENSCAFG00000001507.4:ENSCAFT00000085782.1:exon6:c.C616T:p.R206W,ENSCAFG00000001507.4:ENSCAFT00000083766.1:exon6:c.C616T:p.R206W,ENSCAFG00000001507.4:ENSCAFT00000068315.1:exon5:c.C616T:p.R206W,ENSCAFG00000001507.4:ENSCAFT00000077215.1:exon5:c.C616T:p.R206W,ENSCAFG00000001507.4:ENSCAFT00000002357.4:exon5:c.C616T:p.R206W,ENSCAFG00000001507.4:ENSCAFT00000092338.1:exon6:c.C616T:p.R206W,	ENSCAFG00000001507	NRF1	NRF1	chr14	7132144	7132144	G	A	deleterious(0)	0/1	86,56	0.396	142
6	nonsynonymous SNV	ENSCAFG00000024216.3:ENSCAFT00000021890.4:exon5:c.C1531T:p.R511W,	ENSCAFG00000024216	-	KCND2	chr14	58910910	58910910	C	T	tolerated_low_confidence(0.15)	0/1	54,5	0.089	59
6	nonsynonymous SNV	ENSCAFG00000004390.5:ENSCAFT00000077797.1:exon12:c.A1433G:p.E478G,ENSCAFG00000004390.5:ENSCAFT00000046513.3:exon13:c.A1454G:p.E485G,ENSCAFG00000004390.5:ENSCAFT00000007093.4:exon11:c.A1163G:p.E388G,ENSCAFG00000004390.5:ENSCAFT00000072700.1:exon11:c.A1019G:p.E340G,ENSCAFG00000004390.5:ENSCAFT00000092211.1:exon11:c.A1187G:p.E396G,ENSCAFG00000004390.5:ENSCAFT00000072291.1:exon10:c.A992G:p.E331G,	ENSCAFG00000004390	MAST2	MAST2	chr15	14373689	14373689	T	C	deleterious(0)	0/1	81,4	0.052	85
6	synonymous SNV	ENSCAFG00000005288.4:ENSCAFT00000008550.4:exon17:c.A2817G:p.P939P,ENSCAFG00000005288.4:ENSCAFT00000078021.1:exon16:c.A2679G:p.P893P,	ENSCAFG00000005288	TIE1	TIE1	chr15	16843604	16843604	T	C	-	0|1	36,4	0.091	40
6	nonsynonymous SNV	ENSCAFG00000014481.4:ENSCAFT00000078842.1:exon8:c.A664G:p.K222E,ENSCAFG00000014481.4:ENSCAFT00000022998.4:exon7:c.A709G:p.K237E,	ENSCAFG00000014481	-	PRSS1	chr16	6778249	6778249	T	C	tolerated(0.09)	0/1	114,5	0.047	119
6	nonsynonymous SNV	ENSCAFG00000004539.5:ENSCAFT00000047110.3:exon7:c.A1501T:p.M501L,	ENSCAFG00000004539	ZNF862	ZNF862	chr16	14635202	14635202	A	T	deleterious_low_confidence(0.04)	0/1	80,4	0.054	84
6	nonsynonymous SNV	ENSCAFG00000006766.5:ENSCAFT00000062878.1:exon6:c.C452T:p.A151V,ENSCAFG00000006766.5:ENSCAFT00000010911.5:exon10:c.C1832T:p.A611V,ENSCAFG00000006766.5:ENSCAFT00000010898.3:exon6:c.C527T:p.A176V,	ENSCAFG00000006766	DLC1	DLC1	chr16	36547180	36547180	G	A	tolerated(0.28)	0/1	75,33	0.277	108
6	synonymous SNV	ENSCAFG00000003240.4:ENSCAFT00000048901.2:exon7:c.C1806T:p.C602C,ENSCAFG00000003240.4:ENSCAFT00000091847.1:exon10:c.C1380T:p.C460C,ENSCAFG00000003240.4:ENSCAFT00000068611.1:exon10:c.C2295T:p.C765C,ENSCAFG00000003240.4:ENSCAFT00000087264.1:exon11:c.C2358T:p.C786C,ENSCAFG00000003240.4:ENSCAFT00000005203.4:exon11:c.C2352T:p.C784C,	ENSCAFG00000003240	MYT1L	MYT1L	chr17	985465	985465	G	A	-	0/1	50,4	0.077	54
6	nonsynonymous SNV	ENSCAFG00000003939.4:ENSCAFT00000079799.1:exon3:c.A389T:p.E130V,ENSCAFG00000003939.4:ENSCAFT00000006332.4:exon3:c.A368T:p.E123V,	ENSCAFG00000003939	HBP1	HBP1	chr18	13356430	13356430	T	A	deleterious(0)	0/1	93,8	0.069	101
6	nonsynonymous SNV	ENSCAFG00000008824.3:ENSCAFT00000083207.1:exon10:c.G1073T:p.S358I,ENSCAFG00000008824.3:ENSCAFT00000014022.3:exon11:c.G1253T:p.S418I,	ENSCAFG00000008824	NR1H3	NR1H3	chr18	42333403	42333403	C	A	deleterious(0)	0|1	14,2	0.2	16
6	nonsynonymous SNV	ENSCAFG00000008824.3:ENSCAFT00000083207.1:exon10:c.A1072C:p.S358R,ENSCAFG00000008824.3:ENSCAFT00000014022.3:exon11:c.A1252C:p.S418R,	ENSCAFG00000008824	NR1H3	NR1H3	chr18	42333404	42333404	T	G	deleterious(0)	0|1	14,2	0.2	16
6	nonsynonymous SNV	ENSCAFG00000015767.5:ENSCAFT00000025009.4:exon19:c.C2147T:p.T716I,ENSCAFG00000015767.5:ENSCAFT00000025010.5:exon21:c.C2423T:p.T808I,ENSCAFG00000015767.5:ENSCAFT00000084513.1:exon22:c.C2489T:p.T830I,	ENSCAFG00000015767	GANAB	GANAB	chr18	54017342	54017342	C	T	deleterious(0)	0/1	87,3	0.051	90
6	synonymous SNV	ENSCAFG00000004206.3:ENSCAFT00000006747.3:exon1:c.G699A:p.R233R,	ENSCAFG00000004206	AMER3	AMER3	chr19	20451082	20451082	G	A	-	0/1	77,49	0.369	126
6	nonsynonymous SNV	ENSCAFG00000005022.5:ENSCAFT00000008068.5:exon3:c.G1453A:p.V485M,	ENSCAFG00000005022	TAF3	TAF3	chr2	28167189	28167189	C	T	tolerated(0.2)	0/1	85,4	0.055	89
6	synonymous SNV	ENSCAFG00000009717.4:ENSCAFT00000015444.4:exon8:c.C1318A:p.R440R,ENSCAFG00000009717.4:ENSCAFT00000061054.1:exon8:c.C1318A:p.R440R,ENSCAFG00000009717.4:ENSCAFT00000064634.1:exon9:c.C1081A:p.R361R,	ENSCAFG00000009717	DNAH1	DNAH1	chr20	37428980	37428980	G	T	-	0/1	29,3	0.1	32
6	nonsynonymous SNV	ENSCAFG00000011207.4:ENSCAFT00000017810.4:exon3:c.G2293A:p.G765S,	ENSCAFG00000011207	DAG1	DAG1	chr20	39710480	39710480	C	T	deleterious(0.04)	0/1	74,4	0.051	78
6	nonsynonymous SNV	ENSCAFG00000019711.5:ENSCAFT00000064891.1:exon1:c.C674T:p.A225V,ENSCAFG00000019711.5:ENSCAFT00000046349.3:exon1:c.C674T:p.A225V,ENSCAFG00000019711.5:ENSCAFT00000031345.4:exon3:c.C572T:p.A191V,	ENSCAFG00000019711	POLRMT	POLRMT	chr20	57911074	57911074	C	T	tolerated(0.3)	0/1	19,3	0.167	22
6	synonymous SNV	ENSCAFG00000004778.5:ENSCAFT00000007704.5:exon12:c.A1302G:p.K434K,ENSCAFG00000004778.5:ENSCAFT00000078422.1:exon11:c.A1275G:p.K425K,ENSCAFG00000004778.5:ENSCAFT00000087721.1:exon10:c.A1179G:p.K393K,ENSCAFG00000004778.5:ENSCAFT00000071193.1:exon11:c.A1275G:p.K425K,	ENSCAFG00000004778	NAA16	NAA16	chr22	9265902	9265902	T	C	-	0/1	39,4	0.124	43
6	synonymous SNV	ENSCAFG00000005433.4:ENSCAFT00000091436.1:exon16:c.C2169T:p.I723I,ENSCAFG00000005433.4:ENSCAFT00000065062.1:exon15:c.C2067T:p.I689I,ENSCAFG00000005433.4:ENSCAFT00000091800.1:exon16:c.C2169T:p.I723I,ENSCAFG00000005433.4:ENSCAFT00000072512.1:exon16:c.C2169T:p.I723I,ENSCAFG00000005433.4:ENSCAFT00000008769.4:exon16:c.C2169T:p.I723I,ENSCAFG00000005433.4:ENSCAFT00000070709.1:exon14:c.C2007T:p.I669I,ENS…	ENSCAFG00000005433	ABCC4	ABCC4	chr22	45896118	45896118	G	A	-	0/1	37,41	0.528	78
6	nonsynonymous SNV	ENSCAFG00000030414.1:ENSCAFT00000046090.1:exon1:c.G508A:p.A170T,	ENSCAFG00000030414	-	-	chr22	59203649	59203649	C	T	tolerated(0.06)	0/1	63,43	0.453	106
6	synonymous SNV	ENSCAFG00000006234.5:ENSCAFT00000010085.4:exon8:c.C987T:p.T329T,ENSCAFG00000006234.5:ENSCAFT00000038664.3:exon9:c.C786T:p.T262T,ENSCAFG00000006234.5:ENSCAFT00000010090.5:exon10:c.C1143T:p.T381T,	ENSCAFG00000006234	ADAM33	ADAM33	chr24	17676868	17676868	C	T	-	0/1	21,4	0.158	25
6	nonsynonymous SNV	ENSCAFG00000005940.4:ENSCAFT00000009595.4:exon4:c.C2486G:p.T829S,ENSCAFG00000005940.4:ENSCAFT00000086311.1:exon3:c.C2327G:p.T776S,	ENSCAFG00000005940	THSD1	THSD1	chr25	223460	223460	C	G	tolerated(0.22)	0/1	58,4	0.061	62
6	synonymous SNV	ENSCAFG00000007146.4:ENSCAFT00000011468.4:exon10:c.A2181G:p.A727A,ENSCAFG00000007146.4:ENSCAFT00000066845.1:exon9:c.A2172G:p.A724A,	ENSCAFG00000007146	SACS	SACS	chr25	15280562	15280562	A	G	-	0/1	52,5	0.097	57
6	nonsynonymous SNV	ENSCAFG00000007418.5:ENSCAFT00000046118.3:exon32:c.A4265G:p.D1422G,ENSCAFG00000007418.5:ENSCAFT00000011897.5:exon31:c.A1304G:p.D435G,	ENSCAFG00000007418	RNF17	RNF17	chr25	18620403	18620403	T	C	tolerated(0.08)	0/1	18,3	0.176	21
6	nonsynonymous SNV	ENSCAFG00000006985.6:ENSCAFT00000011198.6:exon41:c.G6439T:p.D2147Y,ENSCAFG00000006985.6:ENSCAFT00000093163.1:exon40:c.G6340T:p.D2114Y,ENSCAFG00000006985.6:ENSCAFT00000081391.1:exon39:c.G6238T:p.D2080Y,ENSCAFG00000006985.6:ENSCAFT00000061352.1:exon30:c.G5152T:p.D1718Y,ENSCAFG00000006985.6:ENSCAFT00000048752.2:exon40:c.G6355T:p.D2119Y,	ENSCAFG00000006985	NCOR2	NCOR2	chr26	5485900	5485900	G	T	deleterious(0)	0/1	44,21	0.333	65
6	nonsynonymous SNV	ENSCAFG00000015670.4:ENSCAFT00000024821.4:exon4:c.G298A:p.G100S,ENSCAFG00000015670.4:ENSCAFT00000087317.1:exon8:c.G394A:p.G132S,	ENSCAFG00000015670	PTEN	-	chr26	37886130	37886130	G	A	deleterious(0)	0/1	66,13	0.185	79
6	synonymous SNV	ENSCAFG00000007749.5:ENSCAFT00000047470.3:exon6:c.T492A:p.P164P,ENSCAFG00000007749.5:ENSCAFT00000012483.5:exon6:c.T492A:p.P164P,	ENSCAFG00000007749	MYOF	MYOF	chr28	7694310	7694310	A	T	-	0|1	97,4	0.055	101
6	synonymous SNV	ENSCAFG00000009850.6:ENSCAFT00000015711.6:exon66:c.T11415C:p.I3805I,	ENSCAFG00000009850	DNAH5	DNAH5	chr34	1005294	1005294	T	C	-	0/1	11,14	0.526	25
6	nonsynonymous SNV	ENSCAFG00000014786.5:ENSCAFT00000060181.1:exon7:c.C1948T:p.P650S,ENSCAFG00000014786.5:ENSCAFT00000063461.1:exon8:c.C2026T:p.P676S,ENSCAFG00000014786.5:ENSCAFT00000083230.1:exon9:c.C1648T:p.P550S,ENSCAFG00000014786.5:ENSCAFT00000062622.1:exon8:c.C1732T:p.P578S,ENSCAFG00000014786.5:ENSCAFT00000092183.1:exon7:c.C1927T:p.P643S,ENSCAFG00000014786.5:ENSCAFT00000023476.5:exon8:c.C2026T:p.P676S,ENSCAFG00…	ENSCAFG00000014786	PHC3	PHC3	chr34	34699021	34699021	G	A	deleterious(0)	0/1	59,49	0.468	108
6	synonymous SNV	ENSCAFG00000009934.5:ENSCAFT00000044892.2:exon3:c.C519T:p.S173S,ENSCAFG00000009934.5:ENSCAFT00000015794.5:exon3:c.C519T:p.S173S,	ENSCAFG00000009934	ATXN1	ATXN1	chr35	15476480	15476480	G	A	-	0/1	63,6	0.102	69
6	nonsynonymous SNV	ENSCAFG00000010398.5:ENSCAFT00000068199.1:exon2:c.C101G:p.A34G,ENSCAFG00000010398.5:ENSCAFT00000047018.2:exon2:c.C101G:p.A34G,ENSCAFG00000010398.5:ENSCAFT00000016531.5:exon2:c.C101G:p.A34G,	ENSCAFG00000010398	KIAA-319	KIAA-319	chr35	22647141	22647141	G	C	tolerated(0.07)	0|1	61,4	0.085	65
6	synonymous SNV	ENSCAFG00000031609.2:ENSCAFT00000047625.2:exon1:c.G213A:p.G71G,	ENSCAFG00000031609	-	-	chr38	15375934	15375934	G	A	-	0/1	43,5	0.103	48
6	stopgain	ENSCAFG00000010822.4:ENSCAFT00000017321.4:exon1:c.C25T:p.Q9X,ENSCAFG00000010822.4:ENSCAFT00000062795.1:exon1:c.C25T:p.Q9X,	ENSCAFG00000010822	ACTN2	ACTN2	chr4	3415068	3415068	G	A	-	0/1	46,4	0.118	50
6	synonymous SNV	ENSCAFG00000012991.5:ENSCAFT00000048488.3:exon10:c.G2754A:p.T918T,	ENSCAFG00000012991	ARID5B	ARID5B	chr4	14100099	14100099	G	A	-	0/1	15,19	0.556	34
6	synonymous SNV	ENSCAFG00000019962.4:ENSCAFT00000080476.1:exon1:c.C213T:p.G71G,	ENSCAFG00000019962	TAF1C	TAF1C	chr5	68175226	68175226	C	T	-	0/1	14,3	0.231	17
6	nonsynonymous SNV	ENSCAFG00000015242.6:ENSCAFT00000043609.2:exon17:c.C2162T:p.S721F,ENSCAFG00000015242.6:ENSCAFT00000063771.1:exon17:c.C2162T:p.S721F,ENSCAFG00000015242.6:ENSCAFT00000062212.1:exon17:c.C2162T:p.S721F,ENSCAFG00000015242.6:ENSCAFT00000024317.6:exon17:c.C2162T:p.S721F,ENSCAFG00000015242.6:ENSCAFT00000063171.1:exon17:c.C2162T:p.S721F,ENSCAFG00000015242.6:ENSCAFT00000070400.1:exon17:c.C2162T:p.S721F,ENS…	ENSCAFG00000015242	TRRAP	TRRAP	chr6	10607779	10607779	G	A	deleterious(0)	0/1	37,8	0.16	45
6	nonsynonymous SNV	ENSCAFG00000015333.4:ENSCAFT00000024339.4:exon2:c.C539T:p.A180V,	ENSCAFG00000015333	NPTX2	NPTX2	chr6	10814446	10814446	G	A	tolerated(0.38)	0/1	58,5	0.083	63
6	nonsynonymous SNV	ENSCAFG00000017733.5:ENSCAFT00000028130.5:exon10:c.T725C:p.V242A,ENSCAFG00000017733.5:ENSCAFT00000067393.1:exon10:c.T776C:p.V259A,ENSCAFG00000017733.5:ENSCAFT00000048365.2:exon12:c.T692C:p.V231A,	ENSCAFG00000017733	POLR3E	POLR3E	chr6	23341379	23341379	A	G	deleterious(0.02)	0/1	94,4	0.047	98
6	nonsynonymous SNV	ENSCAFG00000018135.4:ENSCAFT00000077796.1:exon2:c.C173T:p.A58V,ENSCAFG00000018135.4:ENSCAFT00000028804.4:exon2:c.C173T:p.A58V,	ENSCAFG00000018135	COQ7	COQ7	chr6	25917178	25917178	C	T	deleterious(0.02)	0/1	67,4	0.062	71
6	frameshift deletion	ENSCAFG00000020404.4:ENSCAFT00000036702.3:exon1:c.34delC:p.R12fs,ENSCAFG00000020404.4:ENSCAFT00000086390.1:exon1:c.34delC:p.R12fs,	ENSCAFG00000020404	CRYZ	CRYZ	chr6	71656228	71656228	C	-	-	0/1	36,40	0.5	76
6	synonymous SNV	ENSCAFG00000018125.4:ENSCAFT00000028797.4:exon5:c.T780A:p.R260R,	ENSCAFG00000018125	AQP4	AQP4	chr7	61864659	61864659	T	A	-	0/1	108,6	0.082	114
6	synonymous SNV	ENSCAFG00000014989.4:ENSCAFT00000023790.4:exon5:c.C462T:p.C154C,	ENSCAFG00000014989	WDHD1	WDHD1	chr8	30863917	30863917	G	A	-	0/1	63,4	0.065	67
6	nonsynonymous SNV	ENSCAFG00000016597.4:ENSCAFT00000026282.4:exon2:c.G399C:p.M133I,	ENSCAFG00000016597	SLC1-A1	SLC1-A1	chr8	43535097	43535097	C	G	deleterious(0.01)	0|1	62,4	0.078	66
6	frameshift deletion	ENSCAFG00000018075.4:ENSCAFT00000028719.4:exon11:c.1420delT:p.F474fs,ENSCAFG00000018075.4:ENSCAFT00000085506.1:exon8:c.1171delT:p.F391fs,ENSCAFG00000018075.4:ENSCAFT00000086511.1:exon10:c.1345delT:p.F449fs,	ENSCAFG00000018075	TRAF3	TRAF3	chr8	70789358	70789358	T	-	-	0/1	20,80	0.84	100
6	nonsynonymous SNV	ENSCAFG00000014089.1:ENSCAFT00000022370.1:exon1:c.G1054A:p.A352T,	ENSCAFG00000014089	GJC1	GJC1	chr9	18687580	18687580	G	A	tolerated(0.07)	0/1	67,4	0.049	71
6	nonsynonymous SNV	ENSCAFG00000019633.5:ENSCAFT00000031242.5:exon31:c.C5750T:p.T1917I,	ENSCAFG00000019633	NOTCH1	NOTCH1	chr9	49013160	49013160	C	T	deleterious(0)	0/1	22,4	0.15	26
6	nonsynonymous SNV	ENSCAFG00000015873.5:ENSCAFT00000068101.1:exon45:c.G5407A:p.G1803R,ENSCAFG00000015873.5:ENSCAFT00000089524.1:exon43:c.G5365A:p.G1789R,ENSCAFG00000015873.5:ENSCAFT00000092264.1:exon42:c.G5365A:p.G1789R,ENSCAFG00000015873.5:ENSCAFT00000025182.5:exon45:c.G5464A:p.G1822R,	ENSCAFG00000015873	CACNA1F	CACNA1F	chrX	42303789	42303789	C	T	tolerated_low_confidence(0.13)	0/1	20,3	0.176	23
7	nonsynonymous SNV	ENSCAFG00000000664.4:ENSCAFT00000063929.1:exon4:c.G571A:p.D191N,ENSCAFG00000000664.4:ENSCAFT00000001027.4:exon6:c.G859A:p.D287N,	ENSCAFG00000000664	RSPH3	RSPH3	chr1	48332604	48332604	C	T	deleterious(0.01)	0/1	52,34	0.376	86
7	nonsynonymous SNV	ENSCAFG00000001071.6:ENSCAFT00000046059.2:exon2:c.G640A:p.G214S,	ENSCAFG00000001071	-	AL-96711.2	chr1	66204045	66204045	C	T	tolerated_low_confidence(0.06)	0/1	8,7	0.459	15
7	synonymous SNV	ENSCAFG00000001462.4:ENSCAFT00000089048.1:exon13:c.C1242T:p.C414C,ENSCAFG00000001462.4:ENSCAFT00000002282.4:exon14:c.C1440T:p.C480C,	ENSCAFG00000001462	TLE1	TLE1	chr1	77630792	77630792	C	T	-	0/1	122,70	0.378	192
7	frameshift deletion	ENSCAFG00000004256.4:ENSCAFT00000006841.4:exon9:c.1170_1177del:p.H390fs,ENSCAFG00000004256.4:ENSCAFT00000089891.1:exon8:c.1170_1177del:p.H390fs,ENSCAFG00000004256.4:ENSCAFT00000064705.1:exon8:c.1170_1177del:p.H390fs,ENSCAFG00000004256.4:ENSCAFT00000090158.1:exon7:c.1092_1099del:p.H364fs,	ENSCAFG00000004256	PRKD2	PRKD2	chr1	109223860	109223867	CACGACAC	-	-	0/1	26,6	0.222	32
7	nonsynonymous SNV	ENSCAFG00000002145.5:ENSCAFT00000003375.5:exon6:c.C838T:p.R280W,	ENSCAFG00000002145	IL1RL2	IL1RL2	chr10	40792530	40792530	G	A	tolerated(0.12)	0/1	78,43	0.348	121
7	nonsynonymous SNV	ENSCAFG00000001233.4:ENSCAFT00000068609.1:exon15:c.T3377C:p.L1126P,ENSCAFG00000001233.4:ENSCAFT00000087570.1:exon14:c.T3485C:p.L1162P,ENSCAFG00000001233.4:ENSCAFT00000067760.1:exon16:c.T3977C:p.L1326P,ENSCAFG00000001233.4:ENSCAFT00000068975.1:exon16:c.T3977C:p.L1326P,ENSCAFG00000001233.4:ENSCAFT00000001923.4:exon16:c.T4160C:p.L1387P,	ENSCAFG00000001233	KDM3B	KDM3B	chr11	26014056	26014056	T	C	deleterious(0)	0/1	64,31	0.324	95
7	nonsynonymous SNV	ENSCAFG00000001581.4:ENSCAFT00000076407.1:exon11:c.G1325A:p.R442H,ENSCAFG00000001581.4:ENSCAFT00000062537.1:exon11:c.G1349A:p.R450H,ENSCAFG00000001581.4:ENSCAFT00000002481.4:exon12:c.G1400A:p.R467H,	ENSCAFG00000001581	ADAMTSL1	ADAMTSL1	chr11	38544930	38544930	G	A	tolerated(0.07)	0/1	66,32	0.342	98
7	nonsynonymous SNV	ENSCAFG00000003029.4:ENSCAFT00000004871.4:exon1:c.G12T:p.K4N,	ENSCAFG00000003029	CXCL8	CXCL8	chr13	62434944	62434944	G	T	deleterious_low_confidence(0)	0/1	101,49	0.35	150
7	nonsynonymous SNV	ENSCAFG00000002576.5:ENSCAFT00000004055.5:exon7:c.G5743A:p.A1915T,	ENSCAFG00000002576	HIVEP3	HIVEP3	chr15	1620663	1620663	G	A	tolerated_low_confidence(0.1)	0/1	20,4	0.148	24
7	synonymous SNV	ENSCAFG00000030403.2:ENSCAFT00000044772.2:exon2:c.G558A:p.L186L,	ENSCAFG00000030403	LRAT	LRAT	chr15	52401678	52401678	G	A	-	0/1	42,38	0.474	80
7	nonsynonymous SNV	ENSCAFG00000008759.4:ENSCAFT00000013937.4:exon14:c.C1691T:p.T564M,ENSCAFG00000008759.4:ENSCAFT00000078081.1:exon13:c.C1664T:p.T555M,	ENSCAFG00000008759	FSTL5	FSTL5	chr15	58043938	58043938	G	A	tolerated(1)	0/1	96,65	0.417	161
7	nonsynonymous SNV	ENSCAFG00000003240.4:ENSCAFT00000091847.1:exon16:c.A2192C:p.N731T,ENSCAFG00000003240.4:ENSCAFT00000068611.1:exon16:c.A3107C:p.N1036T,ENSCAFG00000003240.4:ENSCAFT00000087264.1:exon18:c.A3233C:p.N1078T,ENSCAFG00000003240.4:ENSCAFT00000005203.4:exon17:c.A3164C:p.N1055T,	ENSCAFG00000003240	MYT1L	MYT1L	chr17	932819	932819	T	G	tolerated(0.06)	0/1	11,10	0.5	21
7	synonymous SNV	ENSCAFG00000009521.4:ENSCAFT00000015139.4:exon13:c.C1710G:p.T570T,ENSCAFG00000009521.4:ENSCAFT00000077571.1:exon14:c.C1722G:p.T574T,	ENSCAFG00000009521	AMPD1	AMPD1	chr17	52380173	52380173	G	C	-	0/1	51,32	0.383	83
7	nonsynonymous SNV	ENSCAFG00000031855.1:ENSCAFT00000012785.3:exon1:c.C685T:p.R229W,	ENSCAFG00000031855	-	-	chr18	39275324	39275324	G	A	deleterious(0)	0/1	109,68	0.391	177
7	nonsynonymous SNV	ENSCAFG00000011590.5:ENSCAFT00000042823.2:exon12:c.T1194G:p.D398E,ENSCAFG00000011590.5:ENSCAFT00000067380.1:exon11:c.T1131G:p.D377E,ENSCAFG00000011590.5:ENSCAFT00000018392.4:exon13:c.T1110G:p.D370E,	ENSCAFG00000011590	RPS6KB2	RPS6KB2	chr18	50035224	50035224	A	C	tolerated(0.06)	0/1	25,28	0.488	53
7	nonsynonymous SNV	ENSCAFG00000004973.4:ENSCAFT00000083839.1:exon2:c.G158A:p.G53D,ENSCAFG00000004973.4:ENSCAFT00000092774.1:exon3:c.G95A:p.G32D,ENSCAFG00000004973.4:ENSCAFT00000086366.1:exon2:c.G59A:p.G20D,ENSCAFG00000004973.4:ENSCAFT00000008021.4:exon2:c.G14A:p.G5D,	ENSCAFG00000004973	CELF2	CELF2	chr2	25163363	25163363	C	T	deleterious(0.04)	0/1	49,4	0.1	53
7	synonymous SNV	ENSCAFG00000005241.5:ENSCAFT00000008457.4:exon4:c.T312C:p.P104P,ENSCAFG00000005241.5:ENSCAFT00000008454.5:exon3:c.T627C:p.P209P,	ENSCAFG00000005241	NET1	NET1	chr2	30456823	30456823	A	G	-	0/1	81,4	0.061	85
7	synonymous SNV	ENSCAFG00000024193.3:ENSCAFT00000037411.3:exon1:c.G48A:p.Q16Q,	ENSCAFG00000024193	PROB1	PROB1	chr2	34717739	34717739	C	T	-	0/1	22,3	0.129	25
7	synonymous SNV	ENSCAFG00000016721.4:ENSCAFT00000067407.1:exon5:c.C639T:p.I213I,ENSCAFG00000016721.4:ENSCAFT00000077644.1:exon5:c.C639T:p.I213I,ENSCAFG00000016721.4:ENSCAFT00000060612.1:exon5:c.C573T:p.I191I,ENSCAFG00000016721.4:ENSCAFT00000070212.1:exon5:c.C639T:p.I213I,ENSCAFG00000016721.4:ENSCAFT00000092704.1:exon4:c.C324T:p.I108I,ENSCAFG00000016721.4:ENSCAFT00000026485.4:exon5:c.C639T:p.I213I,	ENSCAFG00000016721	EXOSC1-	EXOSC1-	chr2	84948252	84948252	C	T	-	0/1	68,80	0.54	148
7	synonymous SNV	ENSCAFG00000013851.5:ENSCAFT00000022002.4:exon13:c.C3672T:p.G1224G,	ENSCAFG00000013851	FYCO1	FYCO1	chr20	42556133	42556133	C	T	-	0/1	71,4	0.053	75
7	nonsynonymous SNV	ENSCAFG00000017872.5:ENSCAFT00000028356.5:exon9:c.G2099A:p.R700H,ENSCAFG00000017872.5:ENSCAFT00000089962.1:exon7:c.G2258A:p.R753H,	ENSCAFG00000017872	ICAM5	ICAM5	chr20	50811049	50811049	C	T	tolerated(0.19)	0/1	45,33	0.414	78
7	nonsynonymous SNV	ENSCAFG00000042232.1:ENSCAFT00000037238.3:exon1:c.C536T:p.S179F,	ENSCAFG00000042232	OR52AB4	-	chr21	27677082	27677082	C	T	deleterious(0)	0/1	97,92	0.471	189
7	stopgain	ENSCAFG00000009768.5:ENSCAFT00000015513.4:exon5:c.G773A:p.W258X,ENSCAFG00000009768.5:ENSCAFT00000047650.3:exon4:c.G818A:p.W273X,ENSCAFG00000009768.5:ENSCAFT00000071374.1:exon4:c.G818A:p.W273X,	ENSCAFG00000009768	ACOT8	ACOT8	chr24	33151094	33151094	C	T	-	0/1	72,34	0.308	106
7	nonsynonymous SNV	ENSCAFG00000011347.5:ENSCAFT00000046309.3:exon3:c.C38T:p.A13V,ENSCAFG00000011347.5:ENSCAFT00000018030.4:exon1:c.C38T:p.A13V,	ENSCAFG00000011347	STAU1	STAU1	chr24	35852704	35852704	G	A	deleterious_low_confidence(0.05)	0/1	69,4	0.073	73
7	synonymous SNV	ENSCAFG00000029961.2:ENSCAFT00000050042.2:exon4:c.C1404T:p.H468H,	ENSCAFG00000029961	APCDD1L	APCDD1L	chr24	43248453	43248453	G	A	-	0/1	22,3	0.148	25
7	nonsynonymous SNV	ENSCAFG00000007919.4:ENSCAFT00000012667.4:exon12:c.G1595A:p.G532E,	ENSCAFG00000007919	-	AC-48338.1	chr26	7118685	7118685	G	A	tolerated(0.05)	0/1	52,28	0.397	80
7	nonsynonymous SNV	ENSCAFG00000011694.4:ENSCAFT00000084671.1:exon10:c.C2080T:p.P694S,ENSCAFG00000011694.4:ENSCAFT00000064853.1:exon10:c.C2080T:p.P694S,ENSCAFG00000011694.4:ENSCAFT00000085257.1:exon10:c.C2080T:p.P694S,ENSCAFG00000011694.4:ENSCAFT00000018602.4:exon10:c.C2080T:p.P694S,ENSCAFG00000011694.4:ENSCAFT00000087092.1:exon10:c.C2071T:p.P691S,ENSCAFG00000011694.4:ENSCAFT00000085209.1:exon10:c.C2080T:p.P694S,	ENSCAFG00000011694	SEZ6L	SEZ6L	chr26	20047500	20047500	C	T	tolerated(0.13)	0/1	71,39	0.359	110
7	nonsynonymous SNV	ENSCAFG00000014130.2:ENSCAFT00000022422.2:exon2:c.A121G:p.M41V,	ENSCAFG00000014130	VPREB3	VPREB3	chr26	28751547	28751547	A	G	deleterious(0.03)	0/1	25,23	0.525	48
7	synonymous SNV	ENSCAFG00000010455.3:ENSCAFT00000016586.3:exon3:c.C741T:p.F247F,	ENSCAFG00000010455	CALHM3	CALHM3	chr28	15834701	15834701	G	A	-	0/1	10,8	0.494	18
7	synonymous SNV	ENSCAFG00000030705.2:ENSCAFT00000063316.1:exon12:c.C1836T:p.Y612Y,ENSCAFG00000030705.2:ENSCAFT00000043376.2:exon10:c.C1635T:p.Y545Y,	ENSCAFG00000030705	TUBGCP2	TUBGCP2	chr28	40870101	40870101	G	A	-	0/1	24,4	0.15	28
7	synonymous SNV	ENSCAFG00000007516.4:ENSCAFT00000073763.1:exon38:c.T5277C:p.F1759F,ENSCAFG00000007516.4:ENSCAFT00000083588.1:exon39:c.T5388C:p.F1796F,	ENSCAFG00000007516	ARFGEF1	ARFGEF1	chr29	16714326	16714326	A	G	-	0/1	15,8	0.378	23
7	synonymous SNV	ENSCAFG00000009125.4:ENSCAFT00000090457.1:exon1:c.G132A:p.S44S,ENSCAFG00000009125.4:ENSCAFT00000014517.4:exon1:c.G132A:p.S44S,	ENSCAFG00000009125	TMEM67	TMEM67	chr29	38655693	38655693	G	A	-	0/1	54,4	0.069	58
7	synonymous SNV	ENSCAFG00000009031.5:ENSCAFT00000085159.1:exon1:c.C2230T:p.L744L,ENSCAFG00000009031.5:ENSCAFT00000014358.5:exon1:c.C2230T:p.L744L,	ENSCAFG00000009031	CMYA5	CMYA5	chr3	27233377	27233377	G	A	-	0/1	144,120	0.447	264
7	nonsynonymous SNV	ENSCAFG00000012039.4:ENSCAFT00000019117.4:exon2:c.G418C:p.G140R,ENSCAFG00000012039.4:ENSCAFT00000080843.1:exon2:c.G943C:p.G315R,ENSCAFG00000012039.4:ENSCAFT00000087415.1:exon2:c.G526C:p.G176R,ENSCAFG00000012039.4:ENSCAFT00000088135.1:exon3:c.G796C:p.G266R,	ENSCAFG00000012039	ZNF71-	ZNF71-	chr3	53057126	53057126	G	C	deleterious_low_confidence(0)	0/1	51,4	0.094	55
7	synonymous SNV	ENSCAFG00000013473.4:ENSCAFT00000078956.1:exon7:c.G639A:p.R213R,ENSCAFG00000013473.4:ENSCAFT00000081044.1:exon14:c.G1341A:p.R447R,ENSCAFG00000013473.4:ENSCAFT00000073796.1:exon2:c.G399A:p.R133R,ENSCAFG00000013473.4:ENSCAFT00000021374.4:exon14:c.G1341A:p.R447R,ENSCAFG00000013473.4:ENSCAFT00000084998.1:exon13:c.G1059A:p.R353R,	ENSCAFG00000013473	FRMD5	FRMD5	chr30	10615489	10615489	C	T	-	0/1	58,4	0.059	62
7	nonsynonymous SNV	ENSCAFG00000011947.5:ENSCAFT00000018962.4:exon1:c.G19A:p.A7T,ENSCAFG00000011947.5:ENSCAFT00000038385.4:exon1:c.G19A:p.A7T,	ENSCAFG00000011947	GPX5	GPX5	chr35	25653719	25653719	G	A	deleterious(0.04)	0/1	143,70	0.326	213
7	nonsynonymous SNV	ENSCAFG00000030080.2:ENSCAFT00000049520.2:exon4:c.T749C:p.F250S,	ENSCAFG00000030080	CD3-2	CD3-2	chr36	5542167	5542167	A	G	tolerated(0.26)	0/1	89,4	0.044	93
7	nonsynonymous SNV	ENSCAFG00000014025.4:ENSCAFT00000070680.1:exon24:c.C3767T:p.A1256V,ENSCAFG00000014025.4:ENSCAFT00000068029.1:exon25:c.C3902T:p.A1301V,ENSCAFG00000014025.4:ENSCAFT00000061435.1:exon24:c.C3767T:p.A1256V,ENSCAFG00000014025.4:ENSCAFT00000022319.4:exon24:c.C3767T:p.A1256V,	ENSCAFG00000014025	TTN	-	chr36	22387543	22387543	G	A	-	0/1	31,33	0.507	64
7	nonsynonymous SNV	ENSCAFG00000010731.4:ENSCAFT00000017072.4:exon26:c.C5429T:p.A1810V,	ENSCAFG00000010731	USH2A	USH2A	chr38	11470885	11470885	G	A	deleterious(0.04)	0/1	66,51	0.432	117
7	nonsynonymous SNV	ENSCAFG00000016657.5:ENSCAFT00000043870.3:exon13:c.G1231A:p.G411S,ENSCAFG00000016657.5:ENSCAFT00000026388.4:exon13:c.G1231A:p.G411S,	ENSCAFG00000016657	CDHR2	CDHR2	chr4	36756175	36756175	C	T	deleterious(0)	0/1	80,4	0.065	84
7	nonframeshift deletion	ENSCAFG00000015599.4:ENSCAFT00000024718.3:exon1:c.155_163del:p.52_55del,	ENSCAFG00000015599	SCIMP	SCIMP	chr5	31534380	31534388	GCTCCCCTG	-	-	0/1	31,20	0.383	51
7	nonsynonymous SNV	ENSCAFG00000023094.3:ENSCAFT00000027824.4:exon32:c.G4705A:p.V1569M,	ENSCAFG00000023094	MYH3	MYH3	chr5	34918630	34918630	C	T	tolerated(0.07)	0/1	33,40	0.533	73
7	nonsynonymous SNV	ENSCAFG00000016034.5:ENSCAFT00000047576.3:exon26:c.G6451A:p.A2151T,ENSCAFG00000016034.5:ENSCAFT00000025446.5:exon26:c.G6448A:p.A2150T,ENSCAFG00000016034.5:ENSCAFT00000042942.2:exon27:c.G6553A:p.A2185T,	ENSCAFG00000016034	TNRC18	TNRC18	chr6	12599725	12599725	G	A	deleterious(0.04)	0/1	79,4	0.048	83
7	nonsynonymous SNV	ENSCAFG00000017396.5:ENSCAFT00000043598.3:exon19:c.A3544G:p.S1182G,ENSCAFG00000017396.5:ENSCAFT00000062463.1:exon17:c.A3484G:p.S1162G,ENSCAFG00000017396.5:ENSCAFT00000069780.1:exon20:c.A3628G:p.S1210G,ENSCAFG00000017396.5:ENSCAFT00000027566.4:exon18:c.A3562G:p.S1188G,ENSCAFG00000017396.5:ENSCAFT00000073719.1:exon19:c.A3706G:p.S1236G,	ENSCAFG00000017396	KATNIP	KIAA-556	chr6	18930393	18930393	T	C	tolerated(0.26)	0/1	62,5	0.075	67
7	nonsynonymous SNV	ENSCAFG00000017396.5:ENSCAFT00000043598.3:exon19:c.C3537G:p.S1179R,ENSCAFG00000017396.5:ENSCAFT00000062463.1:exon17:c.C3477G:p.S1159R,ENSCAFG00000017396.5:ENSCAFT00000069780.1:exon20:c.C3621G:p.S1207R,ENSCAFG00000017396.5:ENSCAFT00000027566.4:exon18:c.C3555G:p.S1185R,ENSCAFG00000017396.5:ENSCAFT00000073719.1:exon19:c.C3699G:p.S1233R,	ENSCAFG00000017396	KATNIP	KIAA-556	chr6	18930400	18930400	G	C	deleterious(0.03)	0/1	62,5	0.096	67
7	nonsynonymous SNV	ENSCAFG00000017690.4:ENSCAFT00000086826.1:exon2:c.C713T:p.S238L,ENSCAFG00000017690.4:ENSCAFT00000028061.3:exon3:c.C578T:p.S193L,	ENSCAFG00000017690	SCNN1G	SCNN1G	chr6	22586213	22586213	G	A	tolerated(0.2)	0/1	78,70	0.49	148
7	nonsynonymous SNV	ENSCAFG00000019913.4:ENSCAFT00000069283.1:exon12:c.A430G:p.I144V,ENSCAFG00000019913.4:ENSCAFT00000031693.4:exon7:c.A475G:p.I159V,	ENSCAFG00000019913	STXBP3	STXBP3	chr6	42980449	42980449	T	C	tolerated(0.31)	0/1	34,13	0.328	47
7	nonsynonymous SNV	ENSCAFG00000015512.5:ENSCAFT00000024676.5:exon6:c.G478C:p.V160L,ENSCAFG00000015512.5:ENSCAFT00000024667.4:exon6:c.G445C:p.V149L,	ENSCAFG00000015512	POU2F1	POU2F1	chr7	31023284	31023284	C	G	tolerated_low_confidence(0.05)	0/1	33,3	0.12	36
7	synonymous SNV	ENSCAFG00000015803.5:ENSCAFT00000049471.2:exon17:c.G2031A:p.T677T,ENSCAFG00000015803.5:ENSCAFT00000069600.1:exon16:c.G1914A:p.T638T,ENSCAFG00000015803.5:ENSCAFT00000066573.1:exon16:c.G1899A:p.T633T,ENSCAFG00000015803.5:ENSCAFT00000091065.1:exon13:c.G1578A:p.T526T,ENSCAFG00000015803.5:ENSCAFT00000073007.1:exon15:c.G1848A:p.T616T,	ENSCAFG00000015803	SDCCAG8	SDCCAG8	chr7	34622220	34622220	G	A	-	0/1	8,7	0.416	15
7	nonsynonymous SNV	ENSCAFG00000018639.5:ENSCAFT00000092214.1:exon20:c.C2885T:p.T962M,ENSCAFG00000018639.5:ENSCAFT00000029630.5:exon19:c.C2585T:p.T862M,ENSCAFG00000018639.5:ENSCAFT00000075519.1:exon20:c.C2753T:p.T918M,ENSCAFG00000018639.5:ENSCAFT00000068771.1:exon20:c.C2597T:p.T866M,ENSCAFG00000018639.5:ENSCAFT00000060253.1:exon18:c.C2558T:p.T853M,ENSCAFG00000018639.5:ENSCAFT00000089612.1:exon19:c.C2570T:p.T857M,ENS…	ENSCAFG00000018639	PTPRM	PTPRM	chr7	74455845	74455845	C	T	deleterious(0)	0/1	18,9	0.348	27
7	nonsynonymous SNV	ENSCAFG00000018683.5:ENSCAFT00000029651.5:exon6:c.G1465A:p.A489T,ENSCAFG00000018683.5:ENSCAFT00000086137.1:exon5:c.G1387A:p.A463T,ENSCAFG00000018683.5:ENSCAFT00000072580.1:exon6:c.G1465A:p.A489T,ENSCAFG00000018683.5:ENSCAFT00000047993.2:exon6:c.G1465A:p.A489T,ENSCAFG00000018683.5:ENSCAFT00000045245.3:exon6:c.G1465A:p.A489T,	ENSCAFG00000018683	MTCL1	MTCL1	chr7	74920763	74920763	G	A	tolerated(0.46)	0/1	22,21	0.472	43
7	nonsynonymous SNV	ENSCAFG00000011427.5:ENSCAFT00000065417.1:exon1:c.G56A:p.S19N,	ENSCAFG00000011427	ACIN1	ACIN1	chr8	3381897	3381897	C	T	tolerated_low_confidence(0.14)	0/1	37,33	0.447	70
7	nonsynonymous SNV	ENSCAFG00000011868.4:ENSCAFT00000068059.1:exon2:c.T55A:p.W19R,ENSCAFG00000011868.4:ENSCAFT00000018871.4:exon2:c.T517A:p.W173R,ENSCAFG00000011868.4:ENSCAFT00000063491.1:exon2:c.T34A:p.W12R,	ENSCAFG00000011868	PCK2	PCK2	chr8	4101063	4101063	T	A	deleterious_low_confidence(0)	0/1	45,3	0.11	48
7	nonsynonymous SNV	ENSCAFG00000013302.6:ENSCAFT00000021125.5:exon20:c.C3415T:p.R1139W,ENSCAFG00000013302.6:ENSCAFT00000046060.3:exon21:c.C3511T:p.R1171W,	ENSCAFG00000013302	BAZ1A	BAZ1A	chr8	13612604	13612604	G	A	deleterious(0)	0/1	92,35	0.273	127
7	nonsynonymous SNV	ENSCAFG00000018317.5:ENSCAFT00000029099.4:exon7:c.C1870T:p.R624C,	ENSCAFG00000018317	ASPG	ASPG	chr8	71763669	71763669	C	T	-	0/1	20,18	0.483	38
7	synonymous SNV	ENSCAFG00000005442.4:ENSCAFT00000008781.4:exon40:c.C6285T:p.S2095S,	ENSCAFG00000005442	DNAH17	DNAH17	chr9	2764434	2764434	C	T	-	0/1	22,4	0.149	26
7	nonsynonymous SNV	ENSCAFG00000030139.2:ENSCAFT00000048807.2:exon7:c.G656A:p.R219H,	ENSCAFG00000030139	KIF19	KIF19	chr9	6063430	6063430	C	T	deleterious(0.02)	0/1	94,4	0.045	98
7	synonymous SNV	ENSCAFG00000019236.5:ENSCAFT00000030527.5:exon1:c.T666C:p.C222C,	ENSCAFG00000019236	WDR81	WDR81	chr9	45860955	45860955	T	C	-	0/1	104,52	0.363	156
7	nonsynonymous SNV	ENSCAFG00000019897.4:ENSCAFT00000084780.1:exon7:c.C835T:p.H279Y,ENSCAFG00000019897.4:ENSCAFT00000031656.4:exon7:c.C835T:p.H279Y,	ENSCAFG00000019897	SETX	SETX	chr9	51919966	51919966	C	T	deleterious(0)	0|1	39,17	0.3	56
7	nonsynonymous SNV	ENSCAFG00000019897.4:ENSCAFT00000084780.1:exon7:c.A836C:p.H279P,ENSCAFG00000019897.4:ENSCAFT00000031656.4:exon7:c.A836C:p.H279P,	ENSCAFG00000019897	SETX	SETX	chr9	51919967	51919967	A	C	deleterious(0)	0|1	39,17	0.3	56
7	nonsynonymous SNV	ENSCAFG00000013493.5:ENSCAFT00000021395.4:exon5:c.C467T:p.A156V,ENSCAFG00000013493.5:ENSCAFT00000062556.1:exon5:c.C482T:p.A161V,ENSCAFG00000013493.5:ENSCAFT00000038380.4:exon5:c.C527T:p.A176V,ENSCAFG00000013493.5:ENSCAFT00000065553.1:exon5:c.C527T:p.A176V,	ENSCAFG00000013493	PCYT1B	PCYT1B	chrX	20119578	20119578	G	A	tolerated(0.1)	0/1	22,3	0.149	25
7	nonsynonymous SNV	ENSCAFG00000014251.6:ENSCAFT00000045177.3:exon11:c.A1061G:p.D354G,ENSCAFG00000014251.6:ENSCAFT00000092867.1:exon10:c.A962G:p.D321G,ENSCAFG00000014251.6:ENSCAFT00000022643.5:exon10:c.A1013G:p.D338G,ENSCAFG00000014251.6:ENSCAFT00000061362.1:exon11:c.A1061G:p.D354G,ENSCAFG00000014251.6:ENSCAFT00000086773.1:exon11:c.A1061G:p.D354G,ENSCAFG00000014251.6:ENSCAFT00000061818.1:exon9:c.A839G:p.D280G,	ENSCAFG00000014251	DDX3X	DDX3X	chrX	35770529	35770529	A	G	deleterious(0.01)	0/1	4,39	0.867	43
7	nonsynonymous SNV	ENSCAFG00000014589.6:ENSCAFT00000023217.4:exon26:c.C3763T:p.R1255W,ENSCAFG00000014589.6:ENSCAFT00000074698.1:exon27:c.C3919T:p.R1307W,ENSCAFG00000014589.6:ENSCAFT00000093247.1:exon25:c.C3628T:p.R1210W,ENSCAFG00000014589.6:ENSCAFT00000068439.1:exon24:c.C3628T:p.R1210W,ENSCAFG00000014589.6:ENSCAFT00000073366.1:exon27:c.C3919T:p.R1307W,ENSCAFG00000014589.6:ENSCAFT00000061253.1:exon26:c.C3784T:p.R126…	ENSCAFG00000014589	KDM6A	KDM6A	chrX	38938724	38938724	C	T	deleterious(0)	0/1	8,31	0.788	39
7	nonsynonymous SNV	ENSCAFG00000015971.4:ENSCAFT00000025340.4:exon4:c.G103A:p.G35R,ENSCAFG00000015971.4:ENSCAFT00000076094.1:exon5:c.G160A:p.G54R,ENSCAFG00000015971.4:ENSCAFT00000074328.1:exon3:c.G196A:p.G66R,	ENSCAFG00000015971	CLCN5	CLCN5	chrX	42815096	42815096	G	A	tolerated(0.05)	0/1	17,3	0.176	20
7	synonymous SNV	ENSCAFG00000019362.4:ENSCAFT00000082511.1:exon23:c.C2952T:p.S984S,ENSCAFG00000019362.4:ENSCAFT00000030800.4:exon23:c.C3108T:p.S1036S,ENSCAFG00000019362.4:ENSCAFT00000081731.1:exon22:c.C2937T:p.S979S,ENSCAFG00000019362.4:ENSCAFT00000081910.1:exon20:c.C3354T:p.S1118S,ENSCAFG00000019362.4:ENSCAFT00000088508.1:exon21:c.C3477T:p.S1159S,	ENSCAFG00000019362	L1CAM	L1CAM	chrX	121712221	121712221	G	A	-	0/1	21,3	0.158	24
8	synonymous SNV	ENSCAFG00000004173.3:ENSCAFT00000006696.3:exon1:c.C558T:p.C186C,	ENSCAFG00000004173	C5AR2	C5AR2	chr1	108645401	108645401	G	A	-	0/1	20,11	0.348	31
8	synonymous SNV	ENSCAFG00000007505.5:ENSCAFT00000012020.4:exon23:c.C3060T:p.C1020C,	ENSCAFG00000007505	TDRD12	-	chr1	119241010	119241010	G	A	-	0/1	74,4	0.054	78
8	synonymous SNV	ENSCAFG00000001526.4:ENSCAFT00000035372.3:exon4:c.C300T:p.V100V,ENSCAFG00000001526.4:ENSCAFT00000091754.1:exon4:c.C300T:p.V100V,ENSCAFG00000001526.4:ENSCAFT00000061557.1:exon5:c.C255T:p.V85V,	ENSCAFG00000001526	IFT27	IFT27	chr10	27661375	27661375	C	T	-	0/1	13,8	0.437	21
8	nonsynonymous SNV	ENSCAFG00000000224.5:ENSCAFT00000000357.5:exon9:c.A1271G:p.E424G,	ENSCAFG00000000224	YTHDC2	YTHDC2	chr11	3561119	3561119	A	G	tolerated(0.19)	0/1	15,4	0.213	19
8	nonsynonymous SNV	ENSCAFG00000001537.4:ENSCAFT00000002397.4:exon3:c.G565A:p.G189S,	ENSCAFG00000001537	FREM1	FREM1	chr11	35302789	35302789	C	T	deleterious(0)	0/1	47,22	0.34	69
8	nonsynonymous SNV	ENSCAFG00000003526.3:ENSCAFT00000005666.3:exon5:c.C592T:p.R198C,	ENSCAFG00000003526	BRINP1	BRINP1	chr11	72680933	72680933	G	A	deleterious(0)	0/1	31,16	0.371	47
8	frameshift insertion	ENSCAFG00000003045.4:ENSCAFT00000004898.4:exon5:c.423dupG:p.M141fs,	ENSCAFG00000003045	ZNF292	ZNF292	chr12	46741943	46741943	-	G	-	0/1	8,61	0.858	69
8	synonymous SNV	ENSCAFG00000003835.5:ENSCAFT00000006176.4:exon27:c.A3237G:p.V1079V,	ENSCAFG00000003835	AK9	AK9	chr12	66423485	66423485	T	C	-	0/1	92,4	0.052	96
8	nonsynonymous SNV	ENSCAFG00000001086.4:ENSCAFT00000001656.4:exon2:c.C476T:p.S159L,	ENSCAFG00000001086	MYC	MYC	chr13	25203303	25203303	C	T	deleterious(0)	0/1	24,41	0.622	65
8	stopgain	ENSCAFG00000012427.5:ENSCAFT00000019748.4:exon8:c.A1039T:p.K347X,	ENSCAFG00000012427	GABPB2	GABPB2	chr17	60183531	60183531	A	T	-	0|1	65,2	0.043	67
8	synonymous SNV	ENSCAFG00000012427.5:ENSCAFT00000019748.4:exon8:c.A1044T:p.L348L,	ENSCAFG00000012427	GABPB2	GABPB2	chr17	60183536	60183536	A	T	-	0|1	66,2	0.043	68
8	synonymous SNV	ENSCAFG00000004022.5:ENSCAFT00000006460.4:exon4:c.C270T:p.Y90Y,ENSCAFG00000004022.5:ENSCAFT00000036772.4:exon4:c.C270T:p.Y90Y,ENSCAFG00000004022.5:ENSCAFT00000063269.1:exon4:c.C270T:p.Y90Y,ENSCAFG00000004022.5:ENSCAFT00000064593.1:exon4:c.C270T:p.Y90Y,	ENSCAFG00000004022	KIAA11-9	KIAA11-9	chr19	18025406	18025406	G	A	-	0/1	15,4	0.25	19
8	synonymous SNV	ENSCAFG00000004650.3:ENSCAFT00000007477.3:exon2:c.A129T:p.G43G,	ENSCAFG00000004650	-	-	chr19	25564914	25564914	A	T	-	0/1	85,40	0.322	125
8	nonsynonymous SNV	ENSCAFG00000004568.3:ENSCAFT00000007375.3:exon17:c.T2108C:p.L703S,	ENSCAFG00000004568	CUBN	CUBN	chr2	19812344	19812344	T	C	tolerated(0.55)	0/1	45,8	0.125	53
8	nonsynonymous SNV	ENSCAFG00000005888.2:ENSCAFT00000009495.2:exon3:c.G346A:p.A116T,	ENSCAFG00000005888	DND1	DND1	chr2	35826974	35826974	C	T	tolerated(0.33)	0/1	26,3	0.143	29
8	nonsynonymous SNV	ENSCAFG00000011567.6:ENSCAFT00000043874.3:exon5:c.C662T:p.A221V,ENSCAFG00000011567.6:ENSCAFT00000018474.5:exon6:c.C965T:p.A322V,ENSCAFG00000011567.6:ENSCAFT00000018484.5:exon6:c.C965T:p.A322V,	ENSCAFG00000011567	USP19	USP19	chr20	40066209	40066209	C	T	tolerated(0.34)	0/1	51,4	0.105	55
8	synonymous SNV	ENSCAFG00000008896.5:ENSCAFT00000014115.4:exon14:c.C2976T:p.L992L,	ENSCAFG00000008896	KIAA1755	KIAA1755	chr24	26707021	26707021	G	A	-	0/1	28,11	0.333	39
8	nonsynonymous SNV	ENSCAFG00000015618.4:ENSCAFT00000024749.4:exon6:c.A638G:p.Y213C,ENSCAFG00000015618.4:ENSCAFT00000070820.1:exon6:c.A602G:p.Y201C,	ENSCAFG00000015618	TULP3	TULP3	chr27	41829230	41829230	T	C	deleterious(0)	0/1	47,6	0.108	53
8	stopgain	ENSCAFG00000010411.4:ENSCAFT00000070847.1:exon3:c.C367T:p.Q123X,ENSCAFG00000010411.4:ENSCAFT00000088663.1:exon3:c.C367T:p.Q123X,ENSCAFG00000010411.4:ENSCAFT00000075557.1:exon3:c.C367T:p.Q123X,ENSCAFG00000010411.4:ENSCAFT00000089941.1:exon3:c.C367T:p.Q123X,ENSCAFG00000010411.4:ENSCAFT00000071938.1:exon3:c.C367T:p.Q123X,ENSCAFG00000010411.4:ENSCAFT00000091905.1:exon2:c.C235T:p.Q79X,ENSCAFG000000104…	ENSCAFG00000010411	PDCD11	PDCD11	chr28	15772223	15772223	C	T	-	0/1	51,4	0.075	55
8	stopgain	ENSCAFG00000010117.4:ENSCAFT00000016072.4:exon2:c.C715T:p.Q239X,	ENSCAFG00000010117	-	-	chr3	35698698	35698698	G	A	-	0/1	60,39	0.396	99
8	nonsynonymous SNV	ENSCAFG00000014342.4:ENSCAFT00000022798.4:exon13:c.G4997A:p.C1666Y,ENSCAFG00000014342.4:ENSCAFT00000072493.1:exon15:c.G5432A:p.C1811Y,ENSCAFG00000014342.4:ENSCAFT00000066918.1:exon14:c.G5363A:p.C1788Y,ENSCAFG00000014342.4:ENSCAFT00000072782.1:exon15:c.G5432A:p.C1811Y,ENSCAFG00000014342.4:ENSCAFT00000090448.1:exon13:c.G5225A:p.C1742Y,ENSCAFG00000014342.4:ENSCAFT00000064923.1:exon15:c.G5432A:p.C181…	ENSCAFG00000014342	KIAA-232	KIAA-232	chr3	59078091	59078091	G	A	-	0/1	69,5	0.083	74
8	nonsynonymous SNV	ENSCAFG00000015444.5:ENSCAFT00000078223.1:exon28:c.A5525G:p.E1842G,ENSCAFG00000015444.5:ENSCAFT00000082312.1:exon29:c.A7184G:p.E2395G,ENSCAFG00000015444.5:ENSCAFT00000024526.4:exon30:c.A7433G:p.E2478G,ENSCAFG00000015444.5:ENSCAFT00000024538.5:exon30:c.A7433G:p.E2478G,ENSCAFG00000015444.5:ENSCAFT00000080233.1:exon30:c.A7433G:p.E2478G,	ENSCAFG00000015444	DMXL2	DMXL2	chr30	17171785	17171785	T	C	deleterious(0)	0/1	19,4	0.167	23
8	stopgain	ENSCAFG00000010836.5:ENSCAFT00000087665.1:exon49:c.G7946A:p.W2649X,ENSCAFG00000010836.5:ENSCAFT00000080446.1:exon47:c.G7682A:p.W2561X,ENSCAFG00000010836.5:ENSCAFT00000075280.1:exon48:c.G7742A:p.W2581X,ENSCAFG00000010836.5:ENSCAFT00000062837.1:exon49:c.G8204A:p.W2735X,ENSCAFG00000010836.5:ENSCAFT00000017249.4:exon50:c.G8279A:p.W2760X,ENSCAFG00000010836.5:ENSCAFT00000088066.1:exon48:c.G7787A:p.W259…	ENSCAFG00000010836	CENPE	CENPE	chr32	24447814	24447814	C	T	-	0/1	37,4	0.1	41
8	nonsynonymous SNV	ENSCAFG00000015543.5:ENSCAFT00000024648.5:exon15:c.T1459G:p.F487V,	ENSCAFG00000015543	TBL1XR1	TBL1XR1	chr34	40579595	40579595	A	C	deleterious(0)	0/1	29,11	0.276	40
8	nonsynonymous SNV	ENSCAFG00000045512.1:ENSCAFT00000078772.1:exon1:c.A83T:p.K28M,	ENSCAFG00000045512	H3C12	H3C8	chr35	25059616	25059616	T	A	deleterious_low_confidence(0.01)	0/1	50,35	0.437	85
8	nonsynonymous SNV	ENSCAFG00000013081.4:ENSCAFT00000020775.4:exon8:c.C1286T:p.T429M,ENSCAFG00000013081.4:ENSCAFT00000073014.1:exon8:c.C1286T:p.T429M,ENSCAFG00000013081.4:ENSCAFT00000087071.1:exon8:c.C1838T:p.T613M,ENSCAFG00000013081.4:ENSCAFT00000090142.1:exon8:c.C1838T:p.T613M,ENSCAFG00000013081.4:ENSCAFT00000074893.1:exon8:c.C1286T:p.T429M,	ENSCAFG00000013081	JMJD1C	JMJD1C	chr4	15052693	15052693	G	A	tolerated(0.17)	0/1	75,52	0.389	127
8	synonymous SNV	ENSCAFG00000018203.4:ENSCAFT00000028924.4:exon14:c.G1743A:p.E581E,ENSCAFG00000018203.4:ENSCAFT00000082643.1:exon12:c.G1458A:p.E486E,ENSCAFG00000018203.4:ENSCAFT00000082767.1:exon14:c.G1716A:p.E572E,	ENSCAFG00000018203	SLC6A7	SLC6A7	chr4	58874296	58874296	C	T	-	0/1	30,3	0.111	33
8	synonymous SNV	ENSCAFG00000018909.4:ENSCAFT00000060673.1:exon14:c.A1320G:p.L440L,ENSCAFG00000018909.4:ENSCAFT00000085994.1:exon15:c.A1488G:p.L496L,ENSCAFG00000018909.4:ENSCAFT00000030022.3:exon16:c.A1650G:p.L550L,	ENSCAFG00000018909	MTMR12	MTMR12	chr4	75217181	75217181	A	G	-	0/1	55,7	0.106	62
8	synonymous SNV	ENSCAFG00000019006.4:ENSCAFT00000030182.4:exon9:c.C1932T:p.V644V,ENSCAFG00000019006.4:ENSCAFT00000030184.4:exon10:c.C2016T:p.V672V,	ENSCAFG00000019006	-	MROH7	chr5	54463362	54463362	G	A	-	0/1	54,6	0.1	60
8	synonymous SNV	ENSCAFG00000019916.4:ENSCAFT00000031684.4:exon1:c.C1131T:p.G377G,	ENSCAFG00000019916	FOXC2	FOXC2	chr5	66294563	66294563	G	A	-	0/1	15,3	0.2	18
8	nonsynonymous SNV	ENSCAFG00000020305.5:ENSCAFT00000092702.1:exon3:c.A301C:p.S101R,ENSCAFG00000020305.5:ENSCAFT00000032337.5:exon3:c.A301C:p.S101R,ENSCAFG00000020305.5:ENSCAFT00000032333.4:exon3:c.A301C:p.S101R,	ENSCAFG00000020305	CDH1	CDH1	chr5	80784526	80784526	T	G	tolerated(0.36)	0/1	72,42	0.397	114
8	synonymous SNV	ENSCAFG00000013004.6:ENSCAFT00000067214.1:exon46:c.G7326A:p.R2442R,ENSCAFG00000013004.6:ENSCAFT00000091867.1:exon47:c.G7455A:p.R2485R,ENSCAFG00000013004.6:ENSCAFT00000075290.1:exon49:c.G6807A:p.R2269R,ENSCAFG00000013004.6:ENSCAFT00000085649.1:exon47:c.G7455A:p.R2485R,ENSCAFG00000013004.6:ENSCAFT00000066901.1:exon46:c.G7398A:p.R2466R,ENSCAFG00000013004.6:ENSCAFT00000020724.6:exon48:c.G6786A:p.R226…	ENSCAFG00000013004	CACNA1E	CACNA1E	chr7	15262508	15262508	G	A	-	0/1	19,13	0.455	32
8	nonsynonymous SNV	ENSCAFG00000018597.4:ENSCAFT00000029520.4:exon62:c.G8772C:p.K2924N,	ENSCAFG00000018597	LAMA1	LAMA1	chr7	73310481	73310481	C	G	tolerated(0.11)	0/1	62,33	0.333	95
8	nonsynonymous SNV	ENSCAFG00000004968.6:ENSCAFT00000007982.5:exon13:c.A1003G:p.T335A,ENSCAFG00000004968.6:ENSCAFT00000071838.1:exon11:c.A883G:p.T295A,ENSCAFG00000004968.6:ENSCAFT00000007986.5:exon13:c.A1003G:p.T335A,ENSCAFG00000004968.6:ENSCAFT00000059585.1:exon12:c.A1003G:p.T335A,	ENSCAFG00000004968	FBF1	FBF1	chr9	4693232	4693232	A	G	deleterious(0)	0/1	25,4	0.143	29
8	nonsynonymous SNV	ENSCAFG00000017830.4:ENSCAFT00000028282.4:exon3:c.G196A:p.E66K,ENSCAFG00000017830.4:ENSCAFT00000091331.1:exon2:c.G454A:p.E152K,	ENSCAFG00000017830	ZNHIT3	ZNHIT3	chr9	36380916	36380916	G	A	tolerated(0.2)	0/1	25,4	0.149	29
8	nonsynonymous SNV	ENSCAFG00000019390.4:ENSCAFT00000030827.4:exon18:c.A2594G:p.D865G,	ENSCAFG00000019390	EHMT1	EHMT1	chr9	48050568	48050568	T	C	deleterious(0)	0/1	26,5	0.159	31
8	stopgain	ENSCAFG00000019975.4:ENSCAFT00000031793.4:exon21:c.C2074T:p.Q692X,ENSCAFG00000019975.4:ENSCAFT00000081335.1:exon20:c.C1942T:p.Q648X,	ENSCAFG00000019975	USP2-	USP2-	chr9	53971644	53971644	G	A	-	0/1	27,5	0.166	32
8	nonframeshift deletion	ENSCAFG00000037735.2:ENSCAFT00000083764.1:exon3:c.195_197del:p.65_66del,ENSCAFG00000037735.2:ENSCAFT00000065993.1:exon3:c.54_56del:p.18_19del,ENSCAFG00000037735.2:ENSCAFT00000057791.2:exon2:c.657_659del:p.219_220del,	ENSCAFG00000037735	-	TMSB4Y	chrX	9435539	9435541	GAA	-	-	0/1	9,8	0.467	17
8	nonsynonymous SNV	ENSCAFG00000012783.5:ENSCAFT00000078218.1:exon6:c.G3778C:p.D1260H,ENSCAFG00000012783.5:ENSCAFT00000092143.1:exon8:c.G3229C:p.D1077H,ENSCAFG00000012783.5:ENSCAFT00000020268.5:exon7:c.G3322C:p.D1108H,ENSCAFG00000012783.5:ENSCAFT00000044179.2:exon7:c.G2959C:p.D987H,	ENSCAFG00000012783	NHS	NHS	chrX	13826804	13826804	G	C	deleterious_low_confidence(0)	0|1	41,2	0.069	43
8	nonsynonymous SNV	ENSCAFG00000012783.5:ENSCAFT00000078218.1:exon6:c.A3785G:p.D1262G,ENSCAFG00000012783.5:ENSCAFT00000092143.1:exon8:c.A3236G:p.D1079G,ENSCAFG00000012783.5:ENSCAFT00000020268.5:exon7:c.A3329G:p.D1110G,ENSCAFG00000012783.5:ENSCAFT00000044179.2:exon7:c.A2966G:p.D989G,	ENSCAFG00000012783	NHS	NHS	chrX	13826811	13826811	A	G	tolerated_low_confidence(0.08)	0|1	44,2	0.065	46
8	synonymous SNV	ENSCAFG00000012783.5:ENSCAFT00000078218.1:exon8:c.A4674G:p.P1558P,ENSCAFG00000012783.5:ENSCAFT00000092143.1:exon10:c.A4125G:p.P1375P,ENSCAFG00000012783.5:ENSCAFT00000020268.5:exon9:c.A4218G:p.P1406P,ENSCAFG00000012783.5:ENSCAFT00000044179.2:exon9:c.A3855G:p.P1285P,	ENSCAFG00000012783	NHS	NHS	chrX	13831173	13831173	A	G	-	0/1	57,6	0.091	63
8	nonsynonymous SNV	ENSCAFG00000013260.4:ENSCAFT00000021032.4:exon1:c.C1221A:p.H407Q,	ENSCAFG00000013260	KLHL34	KLHL34	chrX	17466491	17466491	G	T	tolerated(0.1)	0|1	3,2	0.4	5
9	nonsynonymous SNV	ENSCAFG00000000850.4:ENSCAFT00000067128.1:exon2:c.G65A:p.R22H,ENSCAFG00000000850.4:ENSCAFT00000062839.1:exon2:c.G116A:p.R39H,ENSCAFG00000000850.4:ENSCAFT00000001331.4:exon2:c.G317A:p.R106H,ENSCAFG00000000850.4:ENSCAFT00000077801.1:exon2:c.G317A:p.R106H,	ENSCAFG00000000850	KIAA-93-	KIAA-93-	chr10	20809906	20809906	G	A	tolerated(0.06)	0/1	32,30	0.478	62
9	synonymous SNV	ENSCAFG00000001511.4:ENSCAFT00000002356.4:exon8:c.C768T:p.T256T,	ENSCAFG00000001511	IL2RB	IL2RB	chr10	27381216	27381216	C	T	-	0/1	83,45	0.345	128
9	frameshift deletion	ENSCAFG00000002142.5:ENSCAFT00000003371.3:exon9:c.1059delG:p.V353fs,	ENSCAFG00000002142	IL1RL1	IL1RL1	chr10	40662902	40662902	C	-	-	0/1	17,13	0.393	30
9	nonsynonymous SNV	ENSCAFG00000002586.4:ENSCAFT00000004066.4:exon7:c.G884A:p.R295H,	ENSCAFG00000002586	PLPPR1	PLPPR1	chr11	58067709	58067709	G	A	tolerated(0.19)	0/1	39,13	0.244	52
9	nonsynonymous SNV	ENSCAFG00000000903.5:ENSCAFT00000001407.4:exon50:c.C3670T:p.P1224S,ENSCAFG00000000903.5:ENSCAFT00000001409.5:exon48:c.C3412T:p.P1138S,ENSCAFG00000000903.5:ENSCAFT00000031814.5:exon47:c.C3349T:p.P1117S,	ENSCAFG00000000903	COL11A2	COL11A2	chr12	2634224	2634224	G	A	tolerated(0.18)	0/1	103,4	0.038	107
9	stopgain	ENSCAFG00000001618.4:ENSCAFT00000002538.4:exon5:c.C826T:p.Q276X,ENSCAFG00000001618.4:ENSCAFT00000072828.1:exon5:c.C676T:p.Q226X,ENSCAFG00000001618.4:ENSCAFT00000078503.1:exon4:c.C610T:p.Q204X,	ENSCAFG00000001618	CCND3	CCND3	chr12	10594871	10594871	G	A	-	0/1	49,36	0.388	85
9	nonsynonymous SNV	ENSCAFG00000003332.4:ENSCAFT00000005480.4:exon16:c.T2741A:p.L914H,	ENSCAFG00000003332	EPHA7	EPHA7	chr12	52139832	52139832	A	T	deleterious(0.01)	0/1	36,28	0.396	64
9	nonsynonymous SNV	ENSCAFG00000001050.5:ENSCAFT00000001612.4:exon13:c.G1462A:p.A488T,ENSCAFG00000001050.5:ENSCAFT00000076554.1:exon12:c.G1267A:p.A423T,ENSCAFG00000001050.5:ENSCAFT00000001615.4:exon13:c.G1354A:p.A452T,ENSCAFG00000001050.5:ENSCAFT00000093662.1:exon12:c.G496A:p.A166T,ENSCAFG00000001050.5:ENSCAFT00000072762.1:exon14:c.G1474A:p.A492T,	ENSCAFG00000001050	MTSS1	MTSS1	chr13	22637636	22637636	C	T	tolerated(0.38)	0/1	69,4	0.069	73
9	synonymous SNV	ENSCAFG00000003075.5:ENSCAFT00000004935.4:exon2:c.C267T:p.N89N,ENSCAFG00000003075.5:ENSCAFT00000047753.3:exon2:c.C267T:p.N89N,	ENSCAFG00000003075	AREG	AREG	chr13	62928318	62928318	C	T	-	0/1	27,15	0.389	42
9	synonymous SNV	ENSCAFG00000001585.5:ENSCAFT00000002504.4:exon15:c.C2289T:p.S763S,ENSCAFG00000001585.5:ENSCAFT00000092907.1:exon15:c.C2289T:p.S763S,ENSCAFG00000001585.5:ENSCAFT00000088426.1:exon15:c.C2289T:p.S763S,ENSCAFG00000001585.5:ENSCAFT00000085053.1:exon15:c.C2289T:p.S763S,ENSCAFG00000001585.5:ENSCAFT00000089254.1:exon15:c.C2289T:p.S763S,ENSCAFG00000001585.5:ENSCAFT00000045585.2:exon15:c.C2289T:p.S763S,	ENSCAFG00000001585	FLNC	FLNC	chr14	7807821	7807821	G	A	-	0/1	19,4	0.176	23
9	nonsynonymous SNV	ENSCAFG00000005320.4:ENSCAFT00000008572.4:exon10:c.C1819A:p.R607S,ENSCAFG00000005320.4:ENSCAFT00000069695.1:exon10:c.C1819A:p.R607S,ENSCAFG00000005320.4:ENSCAFT00000065905.1:exon9:c.C1666A:p.R556S,	ENSCAFG00000005320	CFAP57	CFAP57	chr15	16946182	16946182	G	T	deleterious(0.03)	0/1	38,22	0.341	60
9	nonsynonymous SNV	ENSCAFG00000004011.4:ENSCAFT00000064400.1:exon5:c.C385T:p.R129C,ENSCAFG00000004011.4:ENSCAFT00000006437.4:exon5:c.C385T:p.R129C,ENSCAFG00000004011.4:ENSCAFT00000064929.1:exon5:c.C382T:p.R128C,	ENSCAFG00000004011	TBXAS1	TBXAS1	chr16	8943367	8943367	G	A	deleterious(0)	0/1	59,30	0.375	89
9	nonsynonymous SNV	ENSCAFG00000029617.2:ENSCAFT00000049633.2:exon1:c.T212C:p.I71T,	ENSCAFG00000029617	TM2D2	TM2D2	chr16	26551896	26551896	T	C	deleterious(0.01)	0/1	63,50	0.409	113
9	synonymous SNV	ENSCAFG00000003228.4:ENSCAFT00000005177.4:exon16:c.C1917T:p.N639N,	ENSCAFG00000003228	PXDN	PXDN	chr17	849236	849236	G	A	-	0/1	70,54	0.435	124
9	nonsynonymous SNV	ENSCAFG00000006813.4:ENSCAFT00000063477.1:exon8:c.A1418T:p.K473I,ENSCAFG00000006813.4:ENSCAFT00000010962.4:exon6:c.A1517T:p.K506I,	ENSCAFG00000006813	TRAF6	TRAF6	chr18	31686691	31686691	A	T	deleterious(0)	0/1	101,37	0.268	138
9	nonsynonymous SNV	ENSCAFG00000010099.4:ENSCAFT00000069096.1:exon3:c.G346A:p.A116T,ENSCAFG00000010099.4:ENSCAFT00000082695.1:exon3:c.G346A:p.A116T,ENSCAFG00000010099.4:ENSCAFT00000016050.4:exon3:c.G346A:p.A116T,ENSCAFG00000010099.4:ENSCAFT00000067553.1:exon3:c.G346A:p.A116T,	ENSCAFG00000010099	TH	TH	chr18	46332403	46332403	C	T	tolerated(0.06)	0/1	37,26	0.4	63
9	synonymous SNV	ENSCAFG00000010271.4:ENSCAFT00000084642.1:exon6:c.A489G:p.A163A,ENSCAFG00000010271.4:ENSCAFT00000016316.4:exon7:c.A738G:p.A246A,ENSCAFG00000010271.4:ENSCAFT00000090957.1:exon7:c.A738G:p.A246A,	ENSCAFG00000010271	CARS1	CARS1	chr18	46991220	46991220	T	C	-	0/1	46,4	0.081	50
9	nonsynonymous SNV	ENSCAFG00000014609.4:ENSCAFT00000023225.4:exon2:c.C110T:p.T37I,	ENSCAFG00000014609	FERMT3	FERMT3	chr18	52850858	52850858	G	A	deleterious(0.04)	0/1	77,4	0.05	81
9	nonsynonymous SNV	ENSCAFG00000009395.4:ENSCAFT00000085510.1:exon6:c.G892A:p.D298N,ENSCAFG00000009395.4:ENSCAFT00000014961.4:exon6:c.G892A:p.D298N,	ENSCAFG00000009395	SLC6A2	SLC6A2	chr2	60329555	60329555	C	T	tolerated(0.39)	0/1	74,28	0.289	102
9	synonymous SNV	ENSCAFG00000030496.3:ENSCAFT00000080398.1:exon20:c.A2448G:p.K816K,ENSCAFG00000030496.3:ENSCAFT00000025881.5:exon21:c.A2556G:p.K852K,ENSCAFG00000030496.3:ENSCAFT00000065408.1:exon20:c.A2448G:p.K816K,ENSCAFG00000030496.3:ENSCAFT00000025883.4:exon21:c.A2556G:p.K852K,ENSCAFG00000030496.3:ENSCAFT00000069039.1:exon21:c.A2556G:p.K852K,	ENSCAFG00000030496	FHAD1	FHAD1	chr2	82143426	82143426	T	C	-	0/1	108,4	0.046	112
9	stopgain	ENSCAFG00000023463.4:ENSCAFT00000009554.4:exon50:c.G6560A:p.W2187X,	ENSCAFG00000023463	ITPR1	ITPR1	chr20	12788898	12788898	C	T	-	0/1	42,21	0.34	63
9	synonymous SNV	ENSCAFG00000007603.4:ENSCAFT00000088254.1:exon8:c.C588T:p.H196H,ENSCAFG00000007603.4:ENSCAFT00000012236.4:exon8:c.C1278T:p.H426H,ENSCAFG00000007603.4:ENSCAFT00000085976.1:exon8:c.C1278T:p.H426H,	ENSCAFG00000007603	FLNB	FLNB	chr20	32457749	32457749	G	A	-	0/1	87,49	0.369	136
9	nonsynonymous SNV	ENSCAFG00000018803.4:ENSCAFT00000029855.4:exon16:c.G2462A:p.R821H,	ENSCAFG00000018803	SAFB	SAFB	chr20	54352396	54352396	C	T	deleterious(0.01)	0/1	22,4	0.173	26
9	nonsynonymous SNV	ENSCAFG00000005807.5:ENSCAFT00000087569.1:exon14:c.C2366T:p.A789V,ENSCAFG00000005807.5:ENSCAFT00000044379.3:exon13:c.C2360T:p.A787V,ENSCAFG00000005807.5:ENSCAFT00000068365.1:exon14:c.C2366T:p.A789V,ENSCAFG00000005807.5:ENSCAFT00000009390.4:exon14:c.C2366T:p.A789V,ENSCAFG00000005807.5:ENSCAFT00000060389.1:exon13:c.C2360T:p.A787V,ENSCAFG00000005807.5:ENSCAFT00000078023.1:exon14:c.C2366T:p.A789V,ENS…	ENSCAFG00000005807	NUMA1	NUMA1	chr21	26063698	26063698	C	T	deleterious(0.01)	0/1	49,4	0.071	53
9	nonsynonymous SNV	ENSCAFG00000007863.5:ENSCAFT00000012571.4:exon17:c.A3413G:p.N1138S,ENSCAFG00000007863.5:ENSCAFT00000090937.1:exon16:c.A3272G:p.N1091S,ENSCAFG00000007863.5:ENSCAFT00000060917.1:exon16:c.A3230G:p.N1077S,ENSCAFG00000007863.5:ENSCAFT00000093038.1:exon16:c.A3272G:p.N1091S,ENSCAFG00000007863.5:ENSCAFT00000049875.3:exon17:c.A3401G:p.N1134S,ENSCAFG00000007863.5:ENSCAFT00000090885.1:exon16:c.A3209G:p.N107…	ENSCAFG00000007863	ATR	ATR	chr23	38194475	38194475	T	C	deleterious(0.01)	0/1	21,9	0.32	30
9	synonymous SNV	ENSCAFG00000005157.3:ENSCAFT00000008309.3:exon1:c.C1338T:p.C446C,	ENSCAFG00000005157	THBD	THBD	chr24	601153	601153	C	T	-	0/1	29,15	0.342	44
9	nonsynonymous SNV	ENSCAFG00000006219.5:ENSCAFT00000010050.4:exon13:c.G2999A:p.R1000H,ENSCAFG00000006219.5:ENSCAFT00000071081.1:exon13:c.G2999A:p.R1000H,	ENSCAFG00000006219	SIGLEC1	SIGLEC1	chr24	17652946	17652946	G	A	tolerated(0.56)	0/1	41,27	0.397	68
9	nonsynonymous SNV	ENSCAFG00000006417.4:ENSCAFT00000010362.4:exon2:c.G641A:p.G214D,ENSCAFG00000006417.4:ENSCAFT00000061407.1:exon2:c.G641A:p.G214D,	ENSCAFG00000006417	LZTS3	LZTS3	chr24	18118701	18118701	G	A	deleterious(0.01)	0/1	54,4	0.085	58
9	nonsynonymous SNV	ENSCAFG00000008917.4:ENSCAFT00000039771.3:exon6:c.C611T:p.S204L,	ENSCAFG00000008917	LBP	LBP	chr24	26821035	26821035	C	T	deleterious(0.02)	0/1	18,8	0.333	26
9	synonymous SNV	ENSCAFG00000006019.4:ENSCAFT00000009710.4:exon1:c.G2049A:p.P683P,ENSCAFG00000006019.4:ENSCAFT00000083695.1:exon2:c.G2019A:p.P673P,	ENSCAFG00000006019	FREM2	FREM2	chr25	2261884	2261884	C	T	-	0/1	64,34	0.373	98
9	nonsynonymous SNV	ENSCAFG00000006901.5:ENSCAFT00000011085.5:exon5:c.G1138A:p.E380K,ENSCAFG00000006901.5:ENSCAFT00000060154.1:exon4:c.G946A:p.E316K,ENSCAFG00000006901.5:ENSCAFT00000044298.2:exon6:c.G1027A:p.E343K,	ENSCAFG00000006901	RNF6	RNF6	chr25	13206583	13206583	G	A	deleterious(0.01)	0/1	72,26	0.27	98
9	synonymous SNV	ENSCAFG00000032600.2:ENSCAFT00000049797.2:exon3:c.C990T:p.P330P,	ENSCAFG00000032600	-	AMER2	chr25	14287876	14287876	C	T	-	0/1	23,3	0.166	26
9	nonsynonymous SNV	ENSCAFG00000009019.5:ENSCAFT00000064488.1:exon1:c.C106T:p.R36C,ENSCAFG00000009019.5:ENSCAFT00000014336.5:exon1:c.C106T:p.R36C,	ENSCAFG00000009019	NEFM	-	chr25	32498465	32498465	G	A	deleterious(0)	0/1	18,11	0.417	29
9	synonymous SNV	ENSCAFG00000011037.5:ENSCAFT00000017622.5:exon4:c.G663A:p.K221K,ENSCAFG00000011037.5:ENSCAFT00000089404.1:exon5:c.G693A:p.K231K,	ENSCAFG00000011037	NCL	NCL	chr25	43336656	43336656	C	T	-	0/1	47,35	0.439	82
9	synonymous SNV	ENSCAFG00000011118.4:ENSCAFT00000079396.1:exon5:c.C444T:p.C148C,ENSCAFG00000011118.4:ENSCAFT00000082660.1:exon6:c.C543T:p.C181C,ENSCAFG00000011118.4:ENSCAFT00000017690.4:exon6:c.C543T:p.C181C,ENSCAFG00000011118.4:ENSCAFT00000086213.1:exon3:c.C378T:p.C126C,	ENSCAFG00000011118	COPS7B	COPS7B	chr25	43655391	43655391	C	T	-	0/1	50,32	0.394	82
9	synonymous SNV	ENSCAFG00000011195.4:ENSCAFT00000017792.4:exon9:c.C1515T:p.F505F,ENSCAFG00000011195.4:ENSCAFT00000071314.1:exon7:c.C1719T:p.F573F,ENSCAFG00000011195.4:ENSCAFT00000079486.1:exon7:c.C1719T:p.F573F,	ENSCAFG00000011195	-	ALPG	chr25	44110120	44110120	C	T	-	0/1	92,17	0.17	109
9	nonsynonymous SNV	ENSCAFG00000015538.4:ENSCAFT00000086357.1:exon30:c.G4271T:p.R1424I,ENSCAFG00000015538.4:ENSCAFT00000092503.1:exon30:c.G4271T:p.R1424I,ENSCAFG00000015538.4:ENSCAFT00000059774.1:exon31:c.G4214T:p.R1405I,ENSCAFG00000015538.4:ENSCAFT00000091778.1:exon29:c.G4256T:p.R1419I,ENSCAFG00000015538.4:ENSCAFT00000066276.1:exon30:c.G4271T:p.R1424I,ENSCAFG00000015538.4:ENSCAFT00000024635.4:exon30:c.G4199T:p.R140…	ENSCAFG00000015538	PCDH15	PCDH15	chr26	34563379	34563379	G	T	deleterious(0)	0/1	62,31	0.31	93
9	nonsynonymous SNV	ENSCAFG00000015196.5:ENSCAFT00000075081.1:exon5:c.T710C:p.V237A,ENSCAFG00000015196.5:ENSCAFT00000024124.3:exon2:c.T527C:p.V176A,ENSCAFG00000015196.5:ENSCAFT00000081905.1:exon5:c.T710C:p.V237A,ENSCAFG00000015196.5:ENSCAFT00000047393.3:exon4:c.T908C:p.V303A,	ENSCAFG00000015196	SCNN1A	SCNN1A	chr27	38625611	38625611	T	C	tolerated(0.51)	0/1	15,3	0.199	18
9	synonymous SNV	ENSCAFG00000008033.4:ENSCAFT00000012837.4:exon17:c.A1755G:p.K585K,	ENSCAFG00000008033	NOC3L	NOC3L	chr28	8494053	8494053	T	C	-	0/1	19,5	0.207	24
9	nonsynonymous SNV	ENSCAFG00000007894.4:ENSCAFT00000012639.4:exon6:c.C455T:p.A152V,ENSCAFG00000007894.4:ENSCAFT00000060684.1:exon4:c.C269T:p.A90V,ENSCAFG00000007894.4:ENSCAFT00000087325.1:exon6:c.C368T:p.A123V,ENSCAFG00000007894.4:ENSCAFT00000071660.1:exon6:c.C485T:p.A162V,ENSCAFG00000007894.4:ENSCAFT00000092868.1:exon6:c.C503T:p.A168V,ENSCAFG00000007894.4:ENSCAFT00000084935.1:exon8:c.C455T:p.A152V,	ENSCAFG00000007894	EYA1	EYA1	chr29	20306900	20306900	G	A	tolerated(1)	0/1	41,30	0.423	71
9	nonsynonymous SNV	ENSCAFG00000008310.5:ENSCAFT00000013195.5:exon10:c.G4843A:p.V1615M,	ENSCAFG00000008310	ZFHX4	ZFHX4	chr29	24832313	24832313	G	A	deleterious(0)	0/1	55,27	0.372	82
9	nonsynonymous SNV	ENSCAFG00000013149.5:ENSCAFT00000020878.5:exon10:c.C1915T:p.P639S,ENSCAFG00000013149.5:ENSCAFT00000088991.1:exon9:c.C1714T:p.P572S,	ENSCAFG00000013149	WHAMM	WHAMM	chr3	54642058	54642058	C	T	tolerated(0.16)	0/1	94,5	0.043	99
9	stopgain	ENSCAFG00000013185.4:ENSCAFT00000071587.1:exon9:c.C888G:p.Y296X,ENSCAFG00000013185.4:ENSCAFT00000020916.4:exon7:c.C906G:p.Y302X,	ENSCAFG00000013185	HOMER2	HOMER2	chr3	54660771	54660771	G	C	-	0/1	42,14	0.258	56
9	nonsynonymous SNV	ENSCAFG00000014598.6:ENSCAFT00000023183.6:exon3:c.C766T:p.R256W,	ENSCAFG00000014598	HMX1	HMX1	chr3	60503421	60503421	G	A	deleterious(0)	0/1	16,12	0.476	28
9	synonymous SNV	ENSCAFG00000016782.4:ENSCAFT00000026577.3:exon1:c.C390T:p.I130I,ENSCAFG00000016782.4:ENSCAFT00000081347.1:exon1:c.C390T:p.I130I,	ENSCAFG00000016782	PDE6B	PDE6B	chr3	91774968	91774968	G	A	-	0/1	32,3	0.103	35
9	nonsynonymous SNV	ENSCAFG00000008056.5:ENSCAFT00000012974.4:exon90:c.A13281T:p.E4427D,	ENSCAFG00000008056	RYR3	RYR3	chr30	1198843	1198843	T	A	-	0/1	65,4	0.083	69
9	nonsynonymous SNV	ENSCAFG00000013370.4:ENSCAFT00000021223.4:exon2:c.G214A:p.A72T,ENSCAFG00000013370.4:ENSCAFT00000069179.1:exon2:c.G214A:p.A72T,	ENSCAFG00000013370	SERINC4	SERINC4	chr30	10542005	10542005	C	T	tolerated(0.14)	0/1	61,4	0.071	65
9	nonsynonymous SNV	ENSCAFG00000014548.4:ENSCAFT00000082801.1:exon51:c.G6290A:p.R2097H,ENSCAFG00000014548.4:ENSCAFT00000083350.1:exon51:c.G6323A:p.R2108H,ENSCAFG00000014548.4:ENSCAFT00000023394.4:exon52:c.G6449A:p.R2150H,ENSCAFG00000014548.4:ENSCAFT00000068630.1:exon52:c.G6449A:p.R2150H,ENSCAFG00000014548.4:ENSCAFT00000070890.1:exon45:c.G5618A:p.R1873H,	ENSCAFG00000014548	FBN1	FBN1	chr30	14664749	14664749	C	T	deleterious(0)	0/1	61,4	0.08	65
9	nonsynonymous SNV	ENSCAFG00000017482.5:ENSCAFT00000038032.4:exon13:c.G2017A:p.A673T,ENSCAFG00000017482.5:ENSCAFT00000027712.4:exon15:c.G1939A:p.A647T,ENSCAFG00000017482.5:ENSCAFT00000068321.1:exon13:c.G2017A:p.A673T,ENSCAFG00000017482.5:ENSCAFT00000076961.1:exon13:c.G2017A:p.A673T,	ENSCAFG00000017482	ITGA11	ITGA11	chr30	32345912	32345912	C	T	deleterious(0.04)	0/1	88,53	0.385	141
9	nonsynonymous SNV	ENSCAFG00000007846.4:ENSCAFT00000070563.1:exon9:c.G1219C:p.V407L,ENSCAFG00000007846.4:ENSCAFT00000083871.1:exon9:c.G1219C:p.V407L,ENSCAFG00000007846.4:ENSCAFT00000065411.1:exon9:c.G1219C:p.V407L,ENSCAFG00000007846.4:ENSCAFT00000092205.1:exon9:c.G1219C:p.V407L,ENSCAFG00000007846.4:ENSCAFT00000012537.4:exon9:c.G1219C:p.V407L,	ENSCAFG00000007846	GBE1	GBE1	chr31	5925359	5925359	G	C	deleterious(0)	0/1	23,11	0.357	34
9	synonymous SNV	ENSCAFG00000010646.5:ENSCAFT00000016928.4:exon1:c.C105T:p.Y35Y,	ENSCAFG00000010646	RRP1	RRP1	chr31	37732722	37732722	C	T	-	0/1	17,3	0.175	20
9	nonsynonymous SNV	ENSCAFG00000011938.4:ENSCAFT00000018952.4:exon1:c.G185A:p.C62Y,	ENSCAFG00000011938	SPATC1L	SPATC1L	chr31	39474754	39474754	C	T	deleterious(0.01)	0/1	11,4	0.198	15
9	nonsynonymous SNV	ENSCAFG00000010419.5:ENSCAFT00000048369.3:exon7:c.G914A:p.R305Q,ENSCAFG00000010419.5:ENSCAFT00000016553.4:exon7:c.G914A:p.R305Q,	ENSCAFG00000010419	TMPRSS7	TMPRSS7	chr33	16678444	16678444	G	A	deleterious(0.03)	0/1	25,11	0.3	36
9	synonymous SNV	ENSCAFG00000012767.5:ENSCAFT00000020275.4:exon10:c.C1494T:p.S498S,ENSCAFG00000012767.5:ENSCAFT00000077020.1:exon12:c.C1581T:p.S527S,ENSCAFG00000012767.5:ENSCAFT00000020279.5:exon12:c.C1761T:p.S587S,ENSCAFG00000012767.5:ENSCAFT00000087501.1:exon12:c.C1581T:p.S527S,ENSCAFG00000012767.5:ENSCAFT00000061751.1:exon10:c.C1440T:p.S480S,ENSCAFG00000012767.5:ENSCAFT00000020277.4:exon11:c.C1485T:p.S495S,ENS…	ENSCAFG00000012767	RUBCN	RUBCN	chr33	28994895	28994895	C	T	-	0/1	9,4	0.273	13
9	nonsynonymous SNV	ENSCAFG00000015543.5:ENSCAFT00000024648.5:exon9:c.G854A:p.G285E,	ENSCAFG00000015543	TBL1XR1	TBL1XR1	chr34	40595655	40595655	C	T	deleterious(0.03)	0/1	6,29	0.806	35
9	stopgain	ENSCAFG00000011130.5:ENSCAFT00000068896.1:exon11:c.C1528T:p.Q510X,ENSCAFG00000011130.5:ENSCAFT00000068235.1:exon11:c.C1528T:p.Q510X,ENSCAFG00000011130.5:ENSCAFT00000073386.1:exon11:c.C1528T:p.Q510X,ENSCAFG00000011130.5:ENSCAFT00000017733.5:exon11:c.C1528T:p.Q510X,	ENSCAFG00000011130	SCN2A	SCN2A	chr36	10540925	10540925	C	T	-	0/1	32,18	0.417	50
9	synonymous SNV	ENSCAFG00000018598.4:ENSCAFT00000029526.4:exon10:c.C1419T:p.Y473Y,ENSCAFG00000018598.4:ENSCAFT00000074933.1:exon10:c.C1359T:p.Y453Y,	ENSCAFG00000018598	C6	C6	chr4	68296958	68296958	C	T	-	0/1	43,24	0.383	67
9	nonsynonymous SNV	ENSCAFG00000015871.4:ENSCAFT00000025145.4:exon2:c.G208A:p.A70T,	ENSCAFG00000015871	TM4SF5	TM4SF5	chr5	31789795	31789795	C	T	tolerated(0.29)	0/1	12,36	0.732	48
9	nonsynonymous SNV	ENSCAFG00000016714.4:ENSCAFT00000086831.1:exon6:c.G713C:p.R238P,ENSCAFG00000016714.4:ENSCAFT00000026465.4:exon8:c.G782C:p.R261P,ENSCAFG00000016714.4:ENSCAFT00000081814.1:exon8:c.G974C:p.R325P,	ENSCAFG00000016714	TP53	TP53	chr5	32563055	32563055	C	G	deleterious(0)	0/1	23,47	0.68	70
9	nonsynonymous SNV	ENSCAFG00000017262.4:ENSCAFT00000027478.4:exon22:c.G2686A:p.A896T,ENSCAFG00000017262.4:ENSCAFT00000089952.1:exon22:c.G2440A:p.A814T,ENSCAFG00000017262.4:ENSCAFT00000062990.1:exon22:c.G2596A:p.A866T,ENSCAFG00000017262.4:ENSCAFT00000093835.1:exon23:c.G2716A:p.A906T,	ENSCAFG00000017262	MYH1-	MYH1-	chr5	33275009	33275009	C	T	tolerated(0.08)	0/1	19,3	0.167	22
9	stopgain	ENSCAFG00000019843.6:ENSCAFT00000048247.3:exon9:c.G934T:p.E312X,ENSCAFG00000019843.6:ENSCAFT00000031567.5:exon9:c.G934T:p.E312X,ENSCAFG00000019843.6:ENSCAFT00000079538.1:exon9:c.G1036T:p.E346X,ENSCAFG00000019843.6:ENSCAFT00000063305.1:exon9:c.G934T:p.E312X,ENSCAFG00000019843.6:ENSCAFT00000070213.1:exon9:c.G934T:p.E312X,	ENSCAFG00000019843	ANKRD11	ANKRD11	chr5	64216483	64216483	G	T	-	0/1	10,24	0.759	34
9	nonsynonymous SNV	ENSCAFG00000017167.5:ENSCAFT00000067479.1:exon5:c.C1568T:p.A523V,ENSCAFG00000017167.5:ENSCAFT00000069929.1:exon5:c.C713T:p.A238V,ENSCAFG00000017167.5:ENSCAFT00000027188.5:exon5:c.C1568T:p.A523V,	ENSCAFG00000017167	KCNN3	KCNN3	chr7	42684494	42684494	C	T	deleterious(0.01)	0/1	43,4	0.08	47
9	nonsynonymous SNV	ENSCAFG00000017573.5:ENSCAFT00000027863.4:exon2:c.G82A:p.A28T,	ENSCAFG00000017573	HDHD2	HDHD2	chr7	44336379	44336379	G	A	deleterious(0.01)	0/1	16,13	0.464	29
9	nonsynonymous SNV	ENSCAFG00000015771.4:ENSCAFT00000024992.4:exon1:c.C125A:p.A42D,	ENSCAFG00000015771	TTC25	TTC25	chr9	20921317	20921317	G	T	-	0/1	42,17	0.318	59
9	nonsynonymous SNV	ENSCAFG00000019566.3:ENSCAFT00000031106.3:exon5:c.T853C:p.F285L,	ENSCAFG00000019566	DIPK1B	DIPK1B	chr9	48837475	48837475	A	G	deleterious(0)	0|1	94,4	0.056	98
9	synonymous SNV	ENSCAFG00000019566.3:ENSCAFT00000031106.3:exon5:c.G846A:p.E282E,	ENSCAFG00000019566	DIPK1B	DIPK1B	chr9	48837482	48837482	C	T	-	0|1	88,4	0.057	92
9	nonsynonymous SNV	ENSCAFG00000018218.5:ENSCAFT00000028944.5:exon12:c.A3002T:p.Q1001L,	ENSCAFG00000018218	AMOT	AMOT	chrX	85746799	85746799	T	A	deleterious_low_confidence(0)	0/1	49,30	0.39	79
9	nonsynonymous SNV	ENSCAFG00000018236.5:ENSCAFT00000028969.4:exon3:c.C455A:p.P152H,ENSCAFG00000018236.5:ENSCAFT00000073912.1:exon3:c.C455A:p.P152H,ENSCAFG00000018236.5:ENSCAFT00000084506.1:exon3:c.C455A:p.P152H,ENSCAFG00000018236.5:ENSCAFT00000046134.3:exon3:c.C455A:p.P152H,ENSCAFG00000018236.5:ENSCAFT00000075387.1:exon3:c.C455A:p.P152H,ENSCAFG00000018236.5:ENSCAFT00000086330.1:exon3:c.C455A:p.P152H,	ENSCAFG00000018236	LRCH2	LRCH2	chrX	87936903	87936903	G	T	deleterious(0)	0/1	17,6	0.263	23
9	nonsynonymous SNV	ENSCAFG00000018461.5:ENSCAFT00000087991.1:exon7:c.T581G:p.F194C,ENSCAFG00000018461.5:ENSCAFT00000029326.4:exon9:c.T833G:p.F278C,ENSCAFG00000018461.5:ENSCAFT00000036137.4:exon10:c.T905G:p.F302C,	ENSCAFG00000018461	TMEM255A	TMEM255A	chrX	92254210	92254210	A	C	deleterious(0)	0/1	31,19	0.39	50
9	stopgain	ENSCAFG00000019161.4:ENSCAFT00000030424.4:exon2:c.C100T:p.R34X,ENSCAFG00000019161.4:ENSCAFT00000084294.1:exon2:c.C139T:p.R47X,ENSCAFG00000019161.4:ENSCAFT00000084667.1:exon2:c.C100T:p.R34X,	ENSCAFG00000019161	GABRA3	GABRA3	chrX	120379497	120379497	G	A	-	0/1	51,26	0.382	77
9	nonsynonymous SNV	ENSCAFG00000019605.5:ENSCAFT00000044652.2:exon2:c.G218A:p.R73Q,ENSCAFG00000019605.5:ENSCAFT00000031166.5:exon2:c.G218A:p.R73Q,	ENSCAFG00000019605	IKBKG	IKBKG	chrX	122239291	122239291	G	A	deleterious(0.01)	0/1	21,13	0.37	34
9	nonsynonymous SNV	ENSCAFG00000013063.5:ENSCAFT00000071435.1:exon20:c.G1994A:p.R665K,	ENSCAFG00000013063	TBCD	TBCD	chrUn_JH373243	375012	375012	G	A	-	0/1	28,18	0.394	46
10	nonsynonymous SNV	ENSCAFG00000000772.5:ENSCAFT00000035144.4:exon5:c.A622C:p.K208Q,	ENSCAFG00000000772	QKI	QKI	chr1	51948032	51948032	A	C	tolerated(0.08)	0/1	12,16	0.579	28
10	nonsynonymous SNV	ENSCAFG00000001006.3:ENSCAFT00000001550.3:exon3:c.G668A:p.R223Q,	ENSCAFG00000001006	CLVS2	CLVS2	chr1	62269100	62269100	G	A	tolerated(0.19)	0/1	106,86	0.468	192
10	nonsynonymous SNV	ENSCAFG00000005398.4:ENSCAFT00000008685.4:exon4:c.C340T:p.R114C,	ENSCAFG00000005398	PSMC4	PSMC4	chr1	113554496	113554496	G	A	deleterious(0.01)	0/1	70,62	0.475	132
10	nonsynonymous SNV	ENSCAFG00000000134.4:ENSCAFT00000066971.1:exon12:c.G889A:p.A297T,ENSCAFG00000000134.4:ENSCAFT00000000217.4:exon14:c.G1078A:p.A360T,	ENSCAFG00000000134	RBMS2	RBMS2	chr10	827735	827735	G	A	tolerated(0.44)	0/1	57,65	0.535	122
10	synonymous SNV	ENSCAFG00000000861.4:ENSCAFT00000001343.4:exon1:c.C567T:p.I189I,ENSCAFG00000000861.4:ENSCAFT00000068174.1:exon3:c.C378T:p.I126I,ENSCAFG00000000861.4:ENSCAFT00000062595.1:exon4:c.C3T:p.I1I,	ENSCAFG00000000861	PHF21B	PHF21B	chr10	21046705	21046705	C	T	-	0/1	25,37	0.585	62
10	nonsynonymous SNV	ENSCAFG00000001381.4:ENSCAFT00000002134.4:exon6:c.C1030A:p.R344S,ENSCAFG00000001381.4:ENSCAFT00000075537.1:exon6:c.C1030A:p.R344S,	ENSCAFG00000001381	UHRF2	UHRF2	chr11	27449549	27449549	C	A	deleterious(0)	0|1	70,4	0.074	74
10	nonsynonymous SNV	ENSCAFG00000000786.5:ENSCAFT00000001238.5:exon69:c.A10795C:p.K3599Q,ENSCAFG00000000786.5:ENSCAFT00000001231.4:exon67:c.A10288C:p.K3430Q,	ENSCAFG00000000786	CSMD3	CSMD3	chr13	12409062	12409062	T	G	tolerated(0.13)	0/1	63,23	0.307	86
10	nonsynonymous SNV	ENSCAFG00000001850.4:ENSCAFT00000002935.4:exon1:c.G1C:p.E1Q,	ENSCAFG00000001850	GUF1	GUF1	chr13	41183740	41183740	G	C	-	0/1	55,33	0.39	88
10	synonymous SNV	ENSCAFG00000002069.4:ENSCAFT00000031580.4:exon26:c.T1524C:p.G508G,	ENSCAFG00000002069	COL1A2	COL1A2	chr14	19902008	19902008	T	C	-	0/1	76,53	0.423	129
10	synonymous SNV	ENSCAFG00000003307.4:ENSCAFT00000068435.1:exon23:c.C2436T:p.I812I,ENSCAFG00000003307.4:ENSCAFT00000067832.1:exon23:c.C2436T:p.I812I,ENSCAFG00000003307.4:ENSCAFT00000090259.1:exon21:c.C2148T:p.I716I,ENSCAFG00000003307.4:ENSCAFT00000005304.4:exon23:c.C2436T:p.I812I,ENSCAFG00000003307.4:ENSCAFT00000076998.1:exon23:c.C2436T:p.I812I,ENSCAFG00000003307.4:ENSCAFT00000068186.1:exon23:c.C2436T:p.I812I,	ENSCAFG00000003307	DOCK4	DOCK4	chr14	51567219	51567219	G	A	-	0/1	71,68	0.463	139
10	synonymous SNV	ENSCAFG00000006745.5:ENSCAFT00000010865.5:exon6:c.G4113A:p.P1371P,	ENSCAFG00000006745	PRAG1	PRAG1	chr16	36103722	36103722	G	A	-	0/1	41,24	0.391	65
10	nonsynonymous SNV	ENSCAFG00000006815.4:ENSCAFT00000090463.1:exon4:c.A580C:p.I194L,ENSCAFG00000006815.4:ENSCAFT00000066030.1:exon5:c.A568C:p.I190L,ENSCAFG00000006815.4:ENSCAFT00000010967.4:exon5:c.A568C:p.I190L,ENSCAFG00000006815.4:ENSCAFT00000079270.1:exon5:c.A568C:p.I190L,ENSCAFG00000006815.4:ENSCAFT00000084197.1:exon5:c.A568C:p.I190L,ENSCAFG00000006815.4:ENSCAFT00000067573.1:exon5:c.A568C:p.I190L,ENSCAFG00000006…	ENSCAFG00000006815	TUSC3	TUSC3	chr16	38984665	38984665	A	C	deleterious(0)	0/1	100,89	0.463	189
10	synonymous SNV	ENSCAFG00000005609.5:ENSCAFT00000085122.1:exon9:c.G705A:p.V235V,ENSCAFG00000005609.5:ENSCAFT00000009127.5:exon8:c.G684A:p.V228V,ENSCAFG00000005609.5:ENSCAFT00000047701.2:exon9:c.G705A:p.V235V,ENSCAFG00000005609.5:ENSCAFT00000061513.1:exon7:c.G699A:p.V233V,	ENSCAFG00000005609	XDH	XDH	chr17	24940460	24940460	C	T	-	0/1	68,58	0.462	126
10	nonsynonymous SNV	ENSCAFG00000008079.4:ENSCAFT00000091680.1:exon6:c.A611C:p.D204A,ENSCAFG00000008079.4:ENSCAFT00000091732.1:exon6:c.A611C:p.D204A,ENSCAFG00000008079.4:ENSCAFT00000012921.4:exon6:c.A662C:p.D221A,ENSCAFG00000008079.4:ENSCAFT00000047084.2:exon6:c.A611C:p.D204A,	ENSCAFG00000008079	CTNNA2	CTNNA2	chr17	44217224	44217224	T	G	deleterious(0)	0/1	61,29	0.311	90
10	nonsynonymous SNV	ENSCAFG00000005403.5:ENSCAFT00000008728.4:exon61:c.C9793T:p.H3265Y,	ENSCAFG00000005403	LRP1B	LRP1B	chr19	42803395	42803395	G	A	deleterious(0)	0/1	95,70	0.442	165
10	nonsynonymous SNV	ENSCAFG00000012994.5:ENSCAFT00000020638.4:exon10:c.G1424A:p.R475H,ENSCAFG00000012994.5:ENSCAFT00000049943.3:exon11:c.G1403A:p.R468H,	ENSCAFG00000012994	GRHL3	GRHL3	chr2	75301861	75301861	C	T	deleterious(0)	0/1	48,30	0.377	78
10	nonsynonymous SNV	ENSCAFG00000016301.5:ENSCAFT00000077179.1:exon7:c.C869T:p.A290V,	ENSCAFG00000016301	-	CTRC	chr2	82076477	82076477	G	A	-	0/1	77,44	0.392	121
10	nonsynonymous SNV	ENSCAFG00000047313.1:ENSCAFT00000061343.1:exon9:c.T889A:p.F297I,	ENSCAFG00000047313	IFRD2	IFRD2	chr20	39052336	39052336	T	A	deleterious(0)	0/1	46,53	0.574	99
10	nonsynonymous SNV	ENSCAFG00000047313.1:ENSCAFT00000061343.1:exon12:c.A1271C:p.K424T,	ENSCAFG00000047313	IFRD2	IFRD2	chr20	39053023	39053023	A	C	deleterious(0)	0/1	35,55	0.6	90
10	nonsynonymous SNV	ENSCAFG00000018524.4:ENSCAFT00000029410.4:exon1:c.G232A:p.G78S,ENSCAFG00000018524.4:ENSCAFT00000065168.1:exon1:c.G232A:p.G78S,ENSCAFG00000018524.4:ENSCAFT00000086570.1:exon1:c.G76A:p.G26S,ENSCAFG00000018524.4:ENSCAFT00000083247.1:exon1:c.G232A:p.G78S,ENSCAFG00000018524.4:ENSCAFT00000088471.1:exon1:c.G232A:p.G78S,ENSCAFG00000018524.4:ENSCAFT00000065808.1:exon1:c.G232A:p.G78S,ENSCAFG00000018524.4:E…	ENSCAFG00000018524	HNRNPM	HNRNPM	chr20	52994055	52994055	G	A	tolerated_low_confidence(0.22)	0/1	14,31	0.686	45
10	nonsynonymous SNV	ENSCAFG00000018859.5:ENSCAFT00000060842.1:exon18:c.G3472A:p.G1158R,ENSCAFG00000018859.5:ENSCAFT00000090895.1:exon13:c.G2524A:p.G842R,ENSCAFG00000018859.5:ENSCAFT00000075265.1:exon14:c.G2062A:p.G688R,ENSCAFG00000018859.5:ENSCAFT00000088609.1:exon19:c.G3736A:p.G1246R,ENSCAFG00000018859.5:ENSCAFT00000063354.1:exon18:c.G3817A:p.G1273R,ENSCAFG00000018859.5:ENSCAFT00000072005.1:exon14:c.G2542A:p.G848R,…	ENSCAFG00000018859	PTPRS	PTPRS	chr20	54659953	54659953	G	A	deleterious(0)	0/1	71,96	0.589	167
10	nonsynonymous SNV	ENSCAFG00000025052.3:ENSCAFT00000038820.3:exon2:c.G425T:p.R142I,	ENSCAFG00000025052	-	-	chr21	27253930	27253930	G	T	deleterious(0.02)	0/1	106,82	0.421	188
10	nonsynonymous SNV	ENSCAFG00000025052.3:ENSCAFT00000038820.3:exon2:c.T830C:p.I277T,	ENSCAFG00000025052	-	-	chr21	27254335	27254335	T	C	deleterious(0.01)	0/1	65,57	0.49	122
10	nonsynonymous SNV	ENSCAFG00000013175.5:ENSCAFT00000049094.3:exon6:c.C1268T:p.A423V,ENSCAFG00000013175.5:ENSCAFT00000068890.1:exon5:c.C1360T:p.R454C,	ENSCAFG00000013175	GAL3ST2	GAL3ST2	chr25	51596268	51596268	C	T	-	0/1	14,18	0.567	32
10	nonsynonymous SNV	ENSCAFG00000015670.4:ENSCAFT00000024821.4:exon7:c.T878C:p.L293P,ENSCAFG00000015670.4:ENSCAFT00000087317.1:exon11:c.T974C:p.L325P,	ENSCAFG00000015670	PTEN	-	chr26	37910067	37910067	T	C	deleterious(0)	0/1	13,9	0.389	22
10	synonymous SNV	ENSCAFG00000015522.4:ENSCAFT00000093269.1:exon1:c.C435T:p.S145S,	ENSCAFG00000015522	TEAD4	TEAD4	chr27	41769197	41769197	G	A	-	0/1	73,120	0.636	193
10	nonsynonymous SNV	ENSCAFG00000011376.5:ENSCAFT00000018095.5:exon9:c.T3948A:p.D1316E,ENSCAFG00000011376.5:ENSCAFT00000018087.5:exon9:c.T3948A:p.D1316E,	ENSCAFG00000011376	AKAP13	AKAP13	chr3	49169860	49169860	T	A	tolerated_low_confidence(1)	0/1	25,21	0.455	46
10	stopgain	ENSCAFG00000013972.4:ENSCAFT00000059621.1:exon3:c.C92A:p.S31X,ENSCAFG00000013972.4:ENSCAFT00000022159.4:exon2:c.C140A:p.S47X,ENSCAFG00000013972.4:ENSCAFT00000047940.2:exon2:c.C92A:p.S31X,	ENSCAFG00000013972	ZFAND6	ZFAND6	chr3	57356975	57356975	G	T	-	0/1	218,25	0.125	243
10	nonsynonymous SNV	ENSCAFG00000011222.4:ENSCAFT00000017853.4:exon7:c.G560A:p.R187Q,ENSCAFG00000011222.4:ENSCAFT00000069490.1:exon6:c.G455A:p.R152Q,ENSCAFG00000011222.4:ENSCAFT00000079298.1:exon7:c.G560A:p.R187Q,	ENSCAFG00000011222	TTBK2	TTBK2	chr30	9730082	9730082	C	T	deleterious(0)	0/1	29,26	0.476	55
10	synonymous SNV	ENSCAFG00000009318.5:ENSCAFT00000085142.1:exon14:c.C1638T:p.N546N,ENSCAFG00000009318.5:ENSCAFT00000065304.1:exon15:c.C1665T:p.N555N,ENSCAFG00000009318.5:ENSCAFT00000069088.1:exon15:c.C1665T:p.N555N,	ENSCAFG00000009318	CCDC148	CCDC148	chr36	4078260	4078260	G	A	-	0/1	122,87	0.432	209
10	nonsynonymous SNV	ENSCAFG00000018251.4:ENSCAFT00000028993.3:exon3:c.C709T:p.R237C,ENSCAFG00000018251.4:ENSCAFT00000069213.1:exon3:c.C709T:p.R237C,ENSCAFG00000018251.4:ENSCAFT00000075651.1:exon3:c.C604T:p.R202C,	ENSCAFG00000018251	PDE6A	PDE6A	chr4	59112606	59112606	C	T	deleterious(0)	0/1	63,44	0.411	107
10	frameshift deletion	ENSCAFG00000016714.4:ENSCAFT00000086831.1:exon3:c.384_385del:p.K128fs,ENSCAFG00000016714.4:ENSCAFT00000026465.4:exon5:c.453_454del:p.K151fs,ENSCAFG00000016714.4:ENSCAFT00000081814.1:exon5:c.645_646del:p.K215fs,	ENSCAFG00000016714	TP53	TP53	chr5	32563947	32563948	TC	-	-	0|1	3,30	0.898	33
10	stopgain	ENSCAFG00000016714.4:ENSCAFT00000086831.1:exon3:c.A382T:p.K128X,ENSCAFG00000016714.4:ENSCAFT00000026465.4:exon5:c.A451T:p.K151X,ENSCAFG00000016714.4:ENSCAFT00000081814.1:exon5:c.A643T:p.K215X,	ENSCAFG00000016714	TP53	TP53	chr5	32563950	32563950	T	A	-	0|1	3,30	0.898	33
10	nonsynonymous SNV	ENSCAFG00000030772.2:ENSCAFT00000049192.2:exon1:c.G139C:p.A47P,	ENSCAFG00000030772	PALB2	PALB2	chr6	22209522	22209522	G	C	-	0/1	66,43	0.425	109
10	nonsynonymous SNV	ENSCAFG00000019812.5:ENSCAFT00000017415.5:exon5:c.G323A:p.R108H,ENSCAFG00000019812.5:ENSCAFT00000045240.3:exon5:c.G323A:p.R108H,ENSCAFG00000019812.5:ENSCAFT00000031519.4:exon4:c.G395A:p.R132H,ENSCAFG00000019812.5:ENSCAFT00000069893.1:exon5:c.G323A:p.R108H,ENSCAFG00000019812.5:ENSCAFT00000062874.1:exon4:c.G241A:p.A81T,ENSCAFG00000019812.5:ENSCAFT00000060309.1:exon5:c.G545A:p.R182H,	ENSCAFG00000019812	-	GSTM4	chr6	42206330	42206330	C	T	deleterious_low_confidence(0.03)	0/1	134,85	0.383	219
10	nonsynonymous SNV	ENSCAFG00000012136.4:ENSCAFT00000037067.3:exon1:c.C4T:p.P2S,	ENSCAFG00000012136	NEK2	NEK2	chr7	10052426	10052426	G	A	tolerated(0.09)	0/1	44,4	0.088	48
10	nonsynonymous SNV	ENSCAFG00000018761.5:ENSCAFT00000029783.4:exon29:c.T4114A:p.S1372T,ENSCAFG00000018761.5:ENSCAFT00000044099.3:exon28:c.T3892A:p.S1298T,ENSCAFG00000018761.5:ENSCAFT00000061702.1:exon27:c.T4039A:p.S1347T,ENSCAFG00000018761.5:ENSCAFT00000064321.1:exon27:c.T4039A:p.S1347T,	ENSCAFG00000018761	PIEZO2	PIEZO2	chr7	76544227	76544227	A	T	tolerated(0.13)	0/1	36,23	0.4	59
10	frameshift insertion	ENSCAFG00000010686.4:ENSCAFT00000091465.1:exon2:c.364dupA:p.C121fs,ENSCAFG00000010686.4:ENSCAFT00000017002.4:exon3:c.364dupA:p.C121fs,ENSCAFG00000010686.4:ENSCAFT00000070287.1:exon3:c.364dupA:p.C121fs,ENSCAFG00000010686.4:ENSCAFT00000068646.1:exon3:c.364dupA:p.C121fs,	ENSCAFG00000010686	NLRP3	NLRP3	chr8	257476	257476	-	A	-	0/1	54,46	0.493	100
10	nonsynonymous SNV	ENSCAFG00000014062.5:ENSCAFT00000048988.2:exon17:c.T4586A:p.I1529K,ENSCAFG00000014062.5:ENSCAFT00000046644.3:exon18:c.T4664A:p.I1555K,ENSCAFG00000014062.5:ENSCAFT00000022327.5:exon17:c.T4457A:p.I1486K,	ENSCAFG00000014062	FANCM	FANCM	chr8	22612248	22612248	T	A	deleterious(0)	0/1	64,44	0.408	108
10	nonsynonymous SNV	ENSCAFG00000046771.1:ENSCAFT00000077325.1:exon2:c.A74C:p.E25A,	ENSCAFG00000046771	-	IGHV4-4	chr8	73028689	73028689	T	G	deleterious(0)	0/1	6,26	0.752	32
10	nonsynonymous SNV	ENSCAFG00000005734.5:ENSCAFT00000024000.5:exon2:c.G730A:p.D244N,	ENSCAFG00000005734	ACTG1	ACTG1	chr9	637001	637001	G	A	deleterious_low_confidence(0.04)	0/1	49,35	0.423	84
10	synonymous SNV	ENSCAFG00000005675.5:ENSCAFT00000009155.4:exon54:c.G12834A:p.E4278E,	ENSCAFG00000005675	RNF213	RNF213	chr9	1443808	1443808	C	T	-	0/1	33,39	0.536	72
10	nonsynonymous SNV	ENSCAFG00000013150.5:ENSCAFT00000020880.4:exon5:c.G1141A:p.D381N,	ENSCAFG00000013150	MARCHF1-	MARCHF1-	chr9	10907759	10907759	C	T	deleterious(0.04)	0/1	76,80	0.521	156
10	nonsynonymous SNV	ENSCAFG00000013774.4:ENSCAFT00000021854.4:exon1:c.G193A:p.G65S,ENSCAFG00000013774.4:ENSCAFT00000088008.1:exon1:c.G193A:p.G65S,ENSCAFG00000013774.4:ENSCAFT00000075933.1:exon1:c.G193A:p.G65S,	ENSCAFG00000013774	MAP3K14	MAP3K14	chr9	18280410	18280410	G	A	deleterious(0)	0/1	52,49	0.478	101
10	synonymous SNV	ENSCAFG00000019895.4:ENSCAFT00000031652.4:exon5:c.C1572T:p.I524I,ENSCAFG00000019895.4:ENSCAFT00000074940.1:exon5:c.C1572T:p.I524I,	ENSCAFG00000019895	TTF1	TTF1	chr9	51865372	51865372	C	T	-	0/1	30,3	0.13	33
10	nonsynonymous SNV	ENSCAFG00000028577.2:ENSCAFT00000048645.2:exon3:c.G818T:p.R273L,	ENSCAFG00000028577	XK	XK	chrX	32494593	32494593	G	T	deleterious(0.03)	0/1	119,107	0.467	226
10	nonsynonymous SNV	ENSCAFG00000015326.5:ENSCAFT00000024336.5:exon3:c.G194A:p.G65D,	ENSCAFG00000015326	SLC38A5	SLC38A5	chrX	41716395	41716395	C	T	deleterious(0)	0/1	65,5	0.073	70
11	nonsynonymous SNV	ENSCAFG00000001071.6:ENSCAFT00000046059.2:exon2:c.C415A:p.L139M,	ENSCAFG00000001071	-	AL-96711.2	chr1	66204270	66204270	G	T	tolerated_low_confidence(0.06)	0/1	64,4	0.065	68
11	synonymous SNV	ENSCAFG00000001751.5:ENSCAFT00000002755.5:exon2:c.A102G:p.K34K,ENSCAFG00000001751.5:ENSCAFT00000049329.2:exon1:c.A69G:p.K23K,	ENSCAFG00000001751	TRPM6	TRPM6	chr1	83333594	83333594	A	G	-	0/1	24,6	0.182	30
11	frameshift insertion	ENSCAFG00000007505.5:ENSCAFT00000012020.4:exon22:c.2878dupA:p.T960fs,	ENSCAFG00000007505	TDRD12	-	chr1	119241966	119241966	-	T	-	0/1	80,31	0.258	111
11	nonsynonymous SNV	ENSCAFG00000000612.4:ENSCAFT00000065292.1:exon6:c.T500C:p.I167T,ENSCAFG00000000612.4:ENSCAFT00000049380.2:exon4:c.T422C:p.I141T,ENSCAFG00000000612.4:ENSCAFT00000080510.1:exon5:c.T452C:p.I151T,ENSCAFG00000000612.4:ENSCAFT00000000948.4:exon4:c.T362C:p.I121T,	ENSCAFG00000000612	SBF1	SBF1	chr10	16830117	16830117	T	C	deleterious(0)	0/1	60,4	0.085	64
11	nonsynonymous SNV	ENSCAFG00000001562.5:ENSCAFT00000092992.1:exon4:c.C1223A:p.A408E,ENSCAFG00000001562.5:ENSCAFT00000079769.1:exon6:c.C1832A:p.A611E,ENSCAFG00000001562.5:ENSCAFT00000069290.1:exon5:c.C1748A:p.A583E,ENSCAFG00000001562.5:ENSCAFT00000070474.1:exon6:c.C2012A:p.A671E,ENSCAFG00000001562.5:ENSCAFT00000090278.1:exon5:c.C1631A:p.A544E,ENSCAFG00000001562.5:ENSCAFT00000002441.4:exon4:c.C1577A:p.A526E,ENSCAFG00…	ENSCAFG00000001562	BNC2	BNC2	chr11	36531300	36531300	G	T	tolerated(0.17)	0/1	167,31	0.147	198
11	synonymous SNV	ENSCAFG00000001518.5:ENSCAFT00000049946.2:exon31:c.T3615C:p.V1205V,	ENSCAFG00000001518	DNAH8	DNAH8	chr12	7743404	7743404	T	C	-	0/1	57,26	0.322	83
11	nonsynonymous SNV	ENSCAFG00000007659.5:ENSCAFT00000012281.5:exon4:c.G470A:p.R157H,	ENSCAFG00000007659	SMAD1	SMAD1	chr15	44153946	44153946	G	A	tolerated(0.19)	0/1	112,37	0.262	149
11	nonsynonymous SNV	ENSCAFG00000008141.5:ENSCAFT00000074984.1:exon8:c.C1039T:p.R347C,ENSCAFG00000008141.5:ENSCAFT00000065773.1:exon8:c.C1153T:p.R385C,ENSCAFG00000008141.5:ENSCAFT00000012962.5:exon8:c.C1534T:p.R512C,	ENSCAFG00000008141	FBXW7	FBXW7	chr15	50194596	50194596	G	A	deleterious(0)	0/1	73,19	0.221	92
11	synonymous SNV	ENSCAFG00000004773.4:ENSCAFT00000007688.4:exon1:c.C117T:p.I39I,	ENSCAFG00000004773	AGAP3	AGAP3	chr16	15137223	15137223	C	T	-	0/1	36,3	0.111	39
11	nonsynonymous SNV	ENSCAFG00000011210.4:ENSCAFT00000017817.4:exon9:c.C1441T:p.R481C,ENSCAFG00000011210.4:ENSCAFT00000059846.1:exon9:c.C1441T:p.R481C,	ENSCAFG00000011210	UNC93B1	UNC93B1	chr18	49834828	49834828	C	T	deleterious(0)	0/1	8,6	0.385	14
11	synonymous SNV	ENSCAFG00000009755.5:ENSCAFT00000015496.5:exon2:c.C2499T:p.P833P,	ENSCAFG00000009755	SALL1	SALL1	chr2	64256353	64256353	C	T	-	0/1	83,25	0.265	108
11	nonsynonymous SNV	ENSCAFG00000004492.5:ENSCAFT00000069940.1:exon20:c.C2822T:p.A941V,ENSCAFG00000004492.5:ENSCAFT00000045702.3:exon21:c.C2948T:p.A983V,ENSCAFG00000004492.5:ENSCAFT00000073909.1:exon18:c.C2639T:p.A880V,ENSCAFG00000004492.5:ENSCAFT00000079445.1:exon20:c.C2861T:p.A954V,ENSCAFG00000004492.5:ENSCAFT00000007240.4:exon21:c.C2948T:p.A983V,ENSCAFG00000004492.5:ENSCAFT00000090901.1:exon21:c.C2594T:p.A865V,	ENSCAFG00000004492	GRIP2	GRIP2	chr20	4627000	4627000	G	A	tolerated(0.21)	0/1	24,4	0.13	28
11	nonsynonymous SNV	ENSCAFG00000006722.5:ENSCAFT00000093295.1:exon19:c.G2945A:p.G982E,ENSCAFG00000006722.5:ENSCAFT00000047818.2:exon20:c.G2024A:p.G675E,ENSCAFG00000006722.5:ENSCAFT00000085296.1:exon19:c.G2942A:p.G981E,	ENSCAFG00000006722	MAGI1	MAGI1	chr20	25933612	25933612	G	A	deleterious(0)	0/1	53,23	0.289	76
11	synonymous SNV	ENSCAFG00000005035.4:ENSCAFT00000008099.4:exon5:c.G576A:p.P192P,	ENSCAFG00000005035	ACVR2B	ACVR2B	chr23	8213096	8213096	G	A	-	0/1	113,34	0.26	147
11	nonsynonymous SNV	ENSCAFG00000007119.4:ENSCAFT00000071279.1:exon5:c.C757T:p.R253C,ENSCAFG00000007119.4:ENSCAFT00000092859.1:exon4:c.C853T:p.R285C,ENSCAFG00000007119.4:ENSCAFT00000011400.4:exon5:c.C757T:p.R253C,	ENSCAFG00000007119	CCM2L	CCM2L	chr24	21443850	21443850	C	T	deleterious(0)	0/1	32,4	0.116	36
11	nonsynonymous SNV	ENSCAFG00000008659.4:ENSCAFT00000063776.1:exon8:c.G737A:p.R246H,ENSCAFG00000008659.4:ENSCAFT00000064471.1:exon8:c.G869A:p.R290H,ENSCAFG00000008659.4:ENSCAFT00000013745.3:exon8:c.G869A:p.R290H,	ENSCAFG00000008659	SAMHD1	SAMHD1	chr24	25644960	25644960	C	T	deleterious(0)	0/1	63,17	0.226	80
11	nonsynonymous SNV	ENSCAFG00000010948.5:ENSCAFT00000047790.2:exon23:c.A2515G:p.T839A,	ENSCAFG00000010948	PREX1	PREX1	chr24	35425600	35425600	T	C	deleterious(0.03)	0|1	105,4	0.052	109
11	synonymous SNV	ENSCAFG00000008571.5:ENSCAFT00000013602.4:exon15:c.C2952T:p.F984F,ENSCAFG00000008571.5:ENSCAFT00000049004.3:exon14:c.C2958T:p.F986F,	ENSCAFG00000008571	KCNH3	KCNH3	chr27	5086105	5086105	G	A	-	0/1	24,4	0.208	28
11	nonsynonymous SNV	ENSCAFG00000009975.5:ENSCAFT00000080514.1:exon1:c.C422T:p.A141V,ENSCAFG00000009975.5:ENSCAFT00000015876.5:exon1:c.C422T:p.A141V,	ENSCAFG00000009975	SLC2A13	SLC2A13	chr27	13536475	13536475	C	T	tolerated(0.75)	0/1	17,3	0.175	20
11	nonsynonymous SNV	ENSCAFG00000010310.5:ENSCAFT00000060922.1:exon6:c.G2326A:p.A776T,ENSCAFG00000010310.5:ENSCAFT00000016424.4:exon7:c.G2392A:p.A798T,	ENSCAFG00000010310	CNNM2	CNNM2	chr28	15513955	15513955	G	A	deleterious(0.01)	0/1	92,4	0.048	96
11	stopgain	ENSCAFG00000013430.5:ENSCAFT00000021304.5:exon5:c.C604T:p.R202X,	ENSCAFG00000013430	ZNF511	ZNF511	chr28	40885616	40885616	C	T	-	0/1	44,15	0.261	59
11	nonsynonymous SNV	ENSCAFG00000008199.5:ENSCAFT00000013036.5:exon3:c.T1477C:p.S493P,ENSCAFG00000008199.5:ENSCAFT00000046677.2:exon3:c.T1477C:p.S493P,	ENSCAFG00000008199	FMN1	FMN1	chr30	1816991	1816991	T	C	tolerated(0.26)	0/1	85,4	0.043	89
11	nonsynonymous SNV	ENSCAFG00000015543.5:ENSCAFT00000024648.5:exon6:c.G514T:p.V172F,	ENSCAFG00000015543	TBL1XR1	TBL1XR1	chr34	40599125	40599125	C	A	deleterious(0)	0/1	30,54	0.617	84
11	nonsynonymous SNV	ENSCAFG00000013402.4:ENSCAFT00000021263.4:exon2:c.G584A:p.R195H,	ENSCAFG00000013402	EVX2	EVX2	chr36	19889725	19889725	C	T	deleterious(0)	0/1	22,4	0.158	26
11	nonsynonymous SNV	ENSCAFG00000012060.4:ENSCAFT00000019163.4:exon10:c.C817T:p.R273C,ENSCAFG00000012060.4:ENSCAFT00000066495.1:exon7:c.C823T:p.R275C,ENSCAFG00000012060.4:ENSCAFT00000061110.1:exon9:c.C916T:p.R306C,ENSCAFG00000012060.4:ENSCAFT00000092848.1:exon8:c.C826T:p.R276C,	ENSCAFG00000012060	ORC2	ORC2	chr37	10125283	10125283	G	A	tolerated(0.09)	0/1	33,4	0.108	37
11	synonymous SNV	ENSCAFG00000011731.4:ENSCAFT00000067941.1:exon3:c.C270T:p.R90R,ENSCAFG00000011731.4:ENSCAFT00000018655.4:exon4:c.C372T:p.R124R,ENSCAFG00000011731.4:ENSCAFT00000060614.1:exon3:c.C210T:p.R70R,ENSCAFG00000011731.4:ENSCAFT00000065068.1:exon4:c.C312T:p.R104R,ENSCAFG00000011731.4:ENSCAFT00000064220.1:exon3:c.C279T:p.R93R,	ENSCAFG00000011731	CADM3	CADM3	chr38	22776427	22776427	G	A	-	0/1	48,10	0.186	58
11	nonsynonymous SNV	ENSCAFG00000014613.5:ENSCAFT00000043293.3:exon12:c.T1253C:p.V418A,ENSCAFG00000014613.5:ENSCAFT00000088113.1:exon13:c.T1385C:p.V462A,ENSCAFG00000014613.5:ENSCAFT00000023239.3:exon12:c.T1277C:p.V426A,ENSCAFG00000014613.5:ENSCAFT00000071928.1:exon14:c.T1490C:p.V497A,	ENSCAFG00000014613	CUL5	CUL5	chr5	24404550	24404550	A	G	tolerated(0.11)	0/1	24,3	0.137	27
11	synonymous SNV	ENSCAFG00000018906.5:ENSCAFT00000045716.2:exon5:c.A123G:p.Q41Q,ENSCAFG00000018906.5:ENSCAFT00000030014.5:exon4:c.A195G:p.Q65Q,ENSCAFG00000018906.5:ENSCAFT00000091843.1:exon5:c.A123G:p.Q41Q,	ENSCAFG00000018906	MYSM1	MYSM1	chr5	51045124	51045124	A	G	-	0/1	19,4	0.167	23
11	nonsynonymous SNV	ENSCAFG00000020012.4:ENSCAFT00000031848.4:exon11:c.C1921T:p.R641C,	ENSCAFG00000020012	PKD1L2	PKD1L2	chr5	70685130	70685130	C	T	deleterious(0.03)	0/1	140,7	0.061	147
11	nonsynonymous SNV	ENSCAFG00000016988.4:ENSCAFT00000069936.1:exon3:c.C286T:p.R96W,ENSCAFG00000016988.4:ENSCAFT00000026904.4:exon3:c.C286T:p.R96W,	ENSCAFG00000016988	GBA	GBA	chr7	42318667	42318667	C	T	deleterious(0)	0/1	36,13	0.245	49
11	nonsynonymous SNV	ENSCAFG00000017156.4:ENSCAFT00000077386.1:exon10:c.G917T:p.C306F,ENSCAFG00000017156.4:ENSCAFT00000027162.4:exon9:c.G1226T:p.C409F,	ENSCAFG00000017156	SHC1	SHC1	chr7	42507143	42507143	G	T	tolerated(0.08)	0|1	59,4	0.08	63
11	synonymous SNV	ENSCAFG00000018336.3:ENSCAFT00000029129.3:exon1:c.C474T:p.N158N,	ENSCAFG00000018336	CETN1	CETN1	chr7	67431554	67431554	C	T	-	0/1	31,19	0.354	50
11	nonsynonymous SNV	ENSCAFG00000016948.5:ENSCAFT00000063870.1:exon25:c.A3650G:p.D1217G,ENSCAFG00000016948.5:ENSCAFT00000026830.4:exon25:c.A3695G:p.D1232G,ENSCAFG00000016948.5:ENSCAFT00000046233.3:exon26:c.A3770G:p.D1257G,ENSCAFG00000016948.5:ENSCAFT00000069865.1:exon26:c.A3770G:p.D1257G,ENSCAFG00000016948.5:ENSCAFT00000070409.1:exon26:c.A3284G:p.D1095G,ENSCAFG00000016948.5:ENSCAFT00000073575.1:exon25:c.A3644G:p.D121…	ENSCAFG00000016948	LTBP2	LTBP2	chr8	47665792	47665792	T	C	deleterious(0)	0/1	35,29	0.435	64
11	nonsynonymous SNV	ENSCAFG00000018075.4:ENSCAFT00000028719.4:exon2:c.C188T:p.P63L,ENSCAFG00000018075.4:ENSCAFT00000085506.1:exon2:c.C188T:p.P63L,ENSCAFG00000018075.4:ENSCAFT00000086511.1:exon2:c.C188T:p.P63L,	ENSCAFG00000018075	TRAF3	TRAF3	chr8	70761988	70761988	C	T	deleterious(0)	0/1	63,33	0.338	96
11	synonymous SNV	ENSCAFG00000004729.5:ENSCAFT00000007614.4:exon8:c.C625T:p.L209L,ENSCAFG00000004729.5:ENSCAFT00000046385.3:exon8:c.C568T:p.L190L,ENSCAFG00000004729.5:ENSCAFT00000093136.1:exon5:c.C544T:p.L182L,	ENSCAFG00000004729	NUP85	NUP85	chr9	5267463	5267463	G	A	-	0/1	61,5	0.083	66
11	nonsynonymous SNV	ENSCAFG00000017479.5:ENSCAFT00000035655.3:exon16:c.C1847T:p.P616L,ENSCAFG00000017479.5:ENSCAFT00000027703.5:exon16:c.C1835T:p.P612L,ENSCAFG00000017479.5:ENSCAFT00000090879.1:exon17:c.C1868T:p.P623L,ENSCAFG00000017479.5:ENSCAFT00000093057.1:exon17:c.C1868T:p.P623L,	ENSCAFG00000017479	DIAPH2	DIAPH2	chrX	70343783	70343783	C	T	deleterious(0.02)	0/1	22,24	0.531	46
12	nonsynonymous SNV	ENSCAFG00000004014.4:ENSCAFT00000006426.4:exon11:c.C3442T:p.R1148W,	ENSCAFG00000004014	GRIN2D	GRIN2D	chr1	107823029	107823029	G	A	deleterious_low_confidence(0)	0/1	13,3	0.187	16
12	frameshift deletion	ENSCAFG00000032633.2:ENSCAFT00000093758.1:exon4:c.877delT:p.W293fs,ENSCAFG00000032633.2:ENSCAFT00000047183.2:exon4:c.862delT:p.W288fs,ENSCAFG00000032633.2:ENSCAFT00000087766.1:exon4:c.931delT:p.W311fs,ENSCAFG00000032633.2:ENSCAFT00000059961.1:exon3:c.883delT:p.W295fs,ENSCAFG00000032633.2:ENSCAFT00000080137.1:exon3:c.811delT:p.W271fs,	ENSCAFG00000032633	ZNF283	ZNF283	chr1	111304745	111304745	A	-	-	0/1	88,6	0.085	94
12	synonymous SNV	ENSCAFG00000024052.3:ENSCAFT00000043150.2:exon3:c.G2142A:p.L714L,	ENSCAFG00000024052	GGN	GGN	chr1	114618867	114618867	G	A	-	0/1	24,4	0.161	28
12	nonsynonymous SNV	ENSCAFG00000003463.4:ENSCAFT00000005568.4:exon1:c.C275T:p.A92V,	ENSCAFG00000003463	POU3F3	POU3F3	chr10	38514410	38514410	G	A	deleterious_low_confidence(0)	0/1	54,16	0.245	70
12	nonsynonymous SNV	ENSCAFG00000001433.5:ENSCAFT00000083528.1:exon32:c.T6200C:p.L2067P,ENSCAFG00000001433.5:ENSCAFT00000060448.1:exon31:c.T6116C:p.L2039P,ENSCAFG00000001433.5:ENSCAFT00000082428.1:exon31:c.T6119C:p.L2040P,ENSCAFG00000001433.5:ENSCAFT00000002240.4:exon33:c.T6662C:p.L2221P,ENSCAFG00000001433.5:ENSCAFT00000065106.1:exon33:c.T6260C:p.L2087P,ENSCAFG00000001433.5:ENSCAFT00000075183.1:exon30:c.T6332C:p.L211…	ENSCAFG00000001433	PLEC	PLEC	chr13	37458034	37458034	A	G	deleterious(0)	0/1	8,4	0.3	12
12	synonymous SNV	ENSCAFG00000002795.4:ENSCAFT00000004469.4:exon21:c.A2526G:p.L842L,ENSCAFG00000002795.4:ENSCAFT00000086550.1:exon20:c.A2367G:p.L789L,	ENSCAFG00000002795	STK31	STK31	chr14	37400342	37400342	A	G	-	0/1	26,3	0.13	29
12	nonsynonymous SNV	ENSCAFG00000004694.4:ENSCAFT00000007564.4:exon20:c.G3140A:p.R1047Q,	ENSCAFG00000004694	PTCH2	PTCH2	chr15	15502293	15502293	G	A	deleterious(0.01)	0/1	24,3	0.143	27
12	nonsynonymous SNV	ENSCAFG00000008936.5:ENSCAFT00000048119.3:exon3:c.G218A:p.C73Y,	ENSCAFG00000008936	SPOCK3	SPOCK3	chr15	62537662	62537662	C	T	deleterious(0)	0/1	33,4	0.143	37
12	nonsynonymous SNV	ENSCAFG00000003411.6:ENSCAFT00000074146.1:exon11:c.C1093T:p.R365W,ENSCAFG00000003411.6:ENSCAFT00000005493.4:exon10:c.C1105T:p.R369W,ENSCAFG00000003411.6:ENSCAFT00000048863.3:exon12:c.C1378T:p.R460W,ENSCAFG00000003411.6:ENSCAFT00000067327.1:exon10:c.C1063T:p.R355W,ENSCAFG00000003411.6:ENSCAFT00000076201.1:exon9:c.C973T:p.R325W,	ENSCAFG00000003411	EZH2	EZH2	chr16	1981679	1981679	C	T	deleterious(0.02)	0/1	9,3	0.3	12
12	nonsynonymous SNV	ENSCAFG00000007878.4:ENSCAFT00000080405.1:exon11:c.T1136C:p.L379P,ENSCAFG00000007878.4:ENSCAFT00000012585.3:exon10:c.T1241C:p.L414P,ENSCAFG00000007878.4:ENSCAFT00000084066.1:exon9:c.T1130C:p.L377P,	ENSCAFG00000007878	SLC43A3	SLC43A3	chr18	38742857	38742857	T	C	deleterious(0)	0/1	28,4	0.136	32
12	nonsynonymous SNV	ENSCAFG00000007449.4:ENSCAFT00000011941.4:exon10:c.A1441G:p.S481G,	ENSCAFG00000007449	TRIM23	TRIM23	chr2	51327463	51327463	T	C	tolerated(0.27)	0/1	44,6	0.111	50
12	nonsynonymous SNV	ENSCAFG00000009913.4:ENSCAFT00000015776.4:exon14:c.G1706A:p.R569H,	ENSCAFG00000009913	ADCY7	ADCY7	chr2	65014652	65014652	C	T	tolerated(0.2)	0/1	9,4	0.273	13
12	nonsynonymous SNV	ENSCAFG00000014825.4:ENSCAFT00000078982.1:exon11:c.T1469C:p.V490A,ENSCAFG00000014825.4:ENSCAFT00000023542.4:exon11:c.T1370C:p.V457A,ENSCAFG00000014825.4:ENSCAFT00000090482.1:exon11:c.T1289C:p.V430A,	ENSCAFG00000014825	USP48	USP48	chr2	77445994	77445994	T	C	tolerated(0.31)	0/1	20,3	0.167	23
12	nonsynonymous SNV	ENSCAFG00000005621.4:ENSCAFT00000009043.4:exon4:c.C307T:p.H103Y,	ENSCAFG00000005621	BHLHE4-	BHLHE4-	chr20	12645587	12645587	G	A	tolerated(0.07)	0/1	70,15	0.203	85
12	frameshift insertion	ENSCAFG00000013392.4:ENSCAFT00000060515.1:exon15:c.6539_6540insAACAA:p.P2180fs,ENSCAFG00000013392.4:ENSCAFT00000021260.4:exon15:c.6539_6540insAACAA:p.P2180fs,ENSCAFG00000013392.4:ENSCAFT00000064752.1:exon15:c.6539_6540insAACAA:p.P2180fs,ENSCAFG00000013392.4:ENSCAFT00000072365.1:exon15:c.6539_6540insAACAA:p.P2180fs,ENSCAFG00000013392.4:ENSCAFT00000077709.1:exon15:c.6539_6540insAACAA:p.P2180fs,ENSC…	ENSCAFG00000013392	SETD2	SETD2	chr20	41769212	41769212	-	AACAA	-	0|1	75,25	0.287	100
12	synonymous SNV	ENSCAFG00000013392.4:ENSCAFT00000060515.1:exon15:c.T6540C:p.P2180P,ENSCAFG00000013392.4:ENSCAFT00000021260.4:exon15:c.T6540C:p.P2180P,ENSCAFG00000013392.4:ENSCAFT00000064752.1:exon15:c.T6540C:p.P2180P,ENSCAFG00000013392.4:ENSCAFT00000072365.1:exon15:c.T6540C:p.P2180P,ENSCAFG00000013392.4:ENSCAFT00000077709.1:exon15:c.T6540C:p.P2180P,ENSCAFG00000013392.4:ENSCAFT00000071377.1:exon15:c.T6540C:p.P218…	ENSCAFG00000013392	SETD2	SETD2	chr20	41769213	41769213	T	C	-	0|1	75,25	0.287	100
12	nonsynonymous SNV	ENSCAFG00000018306.4:ENSCAFT00000069360.1:exon13:c.G1265A:p.S422N,ENSCAFG00000018306.4:ENSCAFT00000029080.4:exon15:c.G1334A:p.S445N,	ENSCAFG00000018306	STXBP2	STXBP2	chr20	52419015	52419015	G	A	tolerated(0.2)	0/1	23,4	0.166	27
12	stopgain	ENSCAFG00000004870.4:ENSCAFT00000007840.4:exon2:c.C1288T:p.Q430X,	ENSCAFG00000004870	PCDH17	PCDH17	chr22	13867254	13867254	C	T	-	0/1	26,5	0.149	31
12	nonsynonymous SNV	ENSCAFG00000004969.4:ENSCAFT00000007985.4:exon11:c.C2144A:p.S715Y,ENSCAFG00000004969.4:ENSCAFT00000078418.1:exon10:c.C1619A:p.S540Y,	ENSCAFG00000004969	KLHL1	KLHL1	chr22	24197933	24197933	G	T	tolerated(0.83)	0/1	45,15	0.262	60
12	nonsynonymous SNV	ENSCAFG00000007380.4:ENSCAFT00000011884.4:exon15:c.G1601A:p.R534H,ENSCAFG00000007380.4:ENSCAFT00000088390.1:exon15:c.G1601A:p.R534H,ENSCAFG00000007380.4:ENSCAFT00000080505.1:exon15:c.G923A:p.R308H,	ENSCAFG00000007380	STAG1	STAG1	chr23	32869801	32869801	C	T	deleterious(0)	0/1	20,4	0.157	24
12	nonsynonymous SNV	ENSCAFG00000025031.3:ENSCAFT00000076213.1:exon2:c.T338C:p.V113A,ENSCAFG00000025031.3:ENSCAFT00000038755.3:exon2:c.T338C:p.V113A,	ENSCAFG00000025031	-	-	chr23	44064701	44064701	A	G	deleterious(0.02)	0/1	40,13	0.237	53
12	nonsynonymous SNV	ENSCAFG00000043712.1:ENSCAFT00000011791.4:exon1:c.C74T:p.A25V,	ENSCAFG00000043712	PSPC1	PSPC1	chr25	18287972	18287972	C	T	tolerated_low_confidence(0.1)	0/1	15,3	0.2	18
12	synonymous SNV	ENSCAFG00000032078.2:ENSCAFT00000024290.4:exon2:c.A141C:p.G47G,ENSCAFG00000032078.2:ENSCAFT00000066192.1:exon2:c.A141C:p.G47G,ENSCAFG00000032078.2:ENSCAFT00000088758.1:exon2:c.A141C:p.G47G,ENSCAFG00000032078.2:ENSCAFT00000066054.1:exon2:c.A141C:p.G47G,	ENSCAFG00000032078	-	-	chr26	25976353	25976353	A	C	-	0/1	20,13	0.423	33
12	synonymous SNV	ENSCAFG00000014232.4:ENSCAFT00000059861.1:exon4:c.C1032T:p.G344G,ENSCAFG00000014232.4:ENSCAFT00000067969.1:exon5:c.C1167T:p.G389G,ENSCAFG00000014232.4:ENSCAFT00000080802.1:exon5:c.C1167T:p.G389G,ENSCAFG00000014232.4:ENSCAFT00000022635.4:exon6:c.C921T:p.G307G,ENSCAFG00000014232.4:ENSCAFT00000067689.1:exon5:c.C1167T:p.G389G,	ENSCAFG00000014232	ARVCF	ARVCF	chr26	29349160	29349160	C	T	-	0/1	7,3	0.333	10
12	nonsynonymous SNV	ENSCAFG00000007860.4:ENSCAFT00000012550.4:exon3:c.C437T:p.S146L,	ENSCAFG00000007860	CSRNP2	CSRNP2	chr27	3755678	3755678	C	T	tolerated(0.06)	0/1	30,3	0.103	33
12	nonsynonymous SNV	ENSCAFG00000008892.4:ENSCAFT00000064716.1:exon20:c.C2747T:p.A916V,ENSCAFG00000008892.4:ENSCAFT00000014113.4:exon21:c.C2873T:p.A958V,	ENSCAFG00000008892	URB1	URB1	chr31	27119940	27119940	G	A	tolerated(0.38)	0/1	18,4	0.164	22
12	nonsynonymous SNV	ENSCAFG00000009242.5:ENSCAFT00000014686.3:exon5:c.T2240C:p.L747P,ENSCAFG00000009242.5:ENSCAFT00000044891.3:exon5:c.T2240C:p.L747P,	ENSCAFG00000009242	FILIP1L	FILIP1L	chr33	6472157	6472157	A	G	deleterious(0)	0/1	81,4	0.049	85
12	nonsynonymous SNV	ENSCAFG00000014352.5:ENSCAFT00000022804.5:exon9:c.A790G:p.I264V,ENSCAFG00000014352.5:ENSCAFT00000063261.1:exon11:c.A745G:p.I249V,ENSCAFG00000014352.5:ENSCAFT00000082317.1:exon11:c.A745G:p.I249V,ENSCAFG00000014352.5:ENSCAFT00000042925.2:exon11:c.A790G:p.I264V,ENSCAFG00000014352.5:ENSCAFT00000066179.1:exon11:c.A745G:p.I249V,ENSCAFG00000014352.5:ENSCAFT00000049024.2:exon11:c.A745G:p.I249V,	ENSCAFG00000014352	NMD3	NMD3	chr34	27227897	27227897	A	G	tolerated(0.39)	0/1	28,3	0.136	31
12	nonsynonymous SNV	ENSCAFG00000012464.5:ENSCAFT00000080886.1:exon3:c.C811T:p.H271Y,ENSCAFG00000012464.5:ENSCAFT00000019793.5:exon4:c.C904T:p.H302Y,	ENSCAFG00000012464	FAM117B	FAM117B	chr37	11639181	11639181	C	T	tolerated(0.06)	0/1	12,4	0.25	16
12	nonsynonymous SNV	ENSCAFG00000014957.5:ENSCAFT00000007921.3:exon6:c.G1079A:p.R360H,ENSCAFG00000014957.5:ENSCAFT00000023757.5:exon6:c.G743A:p.R248H,ENSCAFG00000014957.5:ENSCAFT00000060150.1:exon4:c.G761A:p.R254H,ENSCAFG00000014957.5:ENSCAFT00000090153.1:exon4:c.G761A:p.R254H,	ENSCAFG00000014957	PRKAG3	PRKAG3	chr37	25410394	25410394	C	T	tolerated(0.11)	0/1	14,3	0.176	17
12	nonsynonymous SNV	ENSCAFG00000011368.4:ENSCAFT00000018059.4:exon1:c.C2272T:p.R758W,	ENSCAFG00000011368	TLR5	TLR5	chr38	23704304	23704304	C	T	deleterious(0.01)	0/1	22,3	0.15	25
12	nonsynonymous SNV	ENSCAFG00000011358.5:ENSCAFT00000049302.3:exon1:c.T431C:p.L144P,ENSCAFG00000011358.5:ENSCAFT00000072055.1:exon2:c.T38C:p.L13P,ENSCAFG00000011358.5:ENSCAFT00000018051.4:exon3:c.T62C:p.L21P,ENSCAFG00000011358.5:ENSCAFT00000065781.1:exon1:c.T431C:p.L144P,ENSCAFG00000011358.5:ENSCAFT00000087527.1:exon1:c.T431C:p.L144P,	ENSCAFG00000011358	DISP1	DISP1	chr38	23751597	23751597	A	G	deleterious_low_confidence(0)	0/1	19,3	0.166	22
12	frameshift deletion	ENSCAFG00000011522.4:ENSCAFT00000018285.4:exon1:c.154_161del:p.V52fs,	ENSCAFG00000011522	IRF2BP2	IRF2BP2	chr4	5245022	5245029	GTCATCGA	-	-	0/1	28,7	0.238	35
12	nonsynonymous SNV	ENSCAFG00000013726.4:ENSCAFT00000062162.1:exon1:c.C35T:p.A12V,ENSCAFG00000013726.4:ENSCAFT00000021772.4:exon1:c.C35T:p.A12V,ENSCAFG00000013726.4:ENSCAFT00000079739.1:exon1:c.C35T:p.A12V,	ENSCAFG00000013726	SLC25A16	SLC25A16	chr4	19738660	19738660	G	A	deleterious_low_confidence(0)	0/1	10,4	0.273	14
12	synonymous SNV	ENSCAFG00000032469.2:ENSCAFT00000045434.2:exon2:c.C1801T:p.L601L,	ENSCAFG00000032469	DDIT4	DDIT4	chr4	22918019	22918019	C	T	-	0/1	21,3	0.148	24
12	nonsynonymous SNV	ENSCAFG00000018439.5:ENSCAFT00000044970.3:exon13:c.A1636G:p.T546A,ENSCAFG00000018439.5:ENSCAFT00000029284.4:exon13:c.A1549G:p.T517A,ENSCAFG00000018439.5:ENSCAFT00000092638.1:exon13:c.A1636G:p.T546A,ENSCAFG00000018439.5:ENSCAFT00000086847.1:exon13:c.A1549G:p.T517A,	ENSCAFG00000018439	ITGA1	ITGA1	chr4	62331552	62331552	T	C	tolerated(0.14)	0|1	72,4	0.062	76
12	nonsynonymous SNV	ENSCAFG00000015422.5:ENSCAFT00000024467.4:exon18:c.G2644T:p.A882S,ENSCAFG00000015422.5:ENSCAFT00000049596.3:exon17:c.G2554T:p.A852S,	ENSCAFG00000015422	KIAA-753	KIAA-753	chr5	30748693	30748693	G	T	deleterious(0)	0/1	17,4	0.188	21
12	nonsynonymous SNV	ENSCAFG00000018198.5:ENSCAFT00000068610.1:exon13:c.G2368A:p.V790M,ENSCAFG00000018198.5:ENSCAFT00000093898.1:exon13:c.G2440A:p.V814M,ENSCAFG00000018198.5:ENSCAFT00000045797.3:exon15:c.G1966A:p.V656M,ENSCAFG00000018198.5:ENSCAFT00000028910.4:exon15:c.G1918A:p.V640M,ENSCAFG00000018198.5:ENSCAFT00000072791.1:exon15:c.G1894A:p.V632M,	ENSCAFG00000018198	RNF112	RNF112	chr5	40793355	40793355	C	T	deleterious(0)	0/1	17,6	0.286	23
12	synonymous SNV	ENSCAFG00000019022.5:ENSCAFT00000045798.2:exon12:c.G1203A:p.L401L,ENSCAFG00000019022.5:ENSCAFT00000030224.5:exon12:c.G1221A:p.L407L,ENSCAFG00000019022.5:ENSCAFT00000092947.1:exon12:c.G1116A:p.L372L,	ENSCAFG00000019022	ACOT11	ACOT11	chr5	54515434	54515434	C	T	-	0/1	68,4	0.064	72
12	synonymous SNV	ENSCAFG00000016052.3:ENSCAFT00000075069.1:exon2:c.C138T:p.G46G,ENSCAFG00000016052.3:ENSCAFT00000025470.3:exon2:c.C465T:p.G155G,	ENSCAFG00000016052	SLC29A4	SLC29A4	chr6	12620144	12620144	G	A	-	0/1	12,4	0.25	16
12	nonsynonymous SNV	ENSCAFG00000017492.4:ENSCAFT00000080320.1:exon10:c.A919T:p.I307F,ENSCAFG00000017492.4:ENSCAFT00000088790.1:exon10:c.A919T:p.I307F,ENSCAFG00000017492.4:ENSCAFT00000060070.1:exon10:c.A787T:p.I263F,ENSCAFG00000017492.4:ENSCAFT00000064097.1:exon10:c.A919T:p.I307F,ENSCAFG00000017492.4:ENSCAFT00000027716.4:exon10:c.A919T:p.I307F,	ENSCAFG00000017492	ARHGAP17	ARHGAP17	chr6	21145899	21145899	A	T	deleterious(0)	0/1	24,4	0.227	28
12	synonymous SNV	ENSCAFG00000019346.5:ENSCAFT00000076290.1:exon2:c.G27A:p.T9T,ENSCAFG00000019346.5:ENSCAFT00000065396.1:exon2:c.G27A:p.T9T,ENSCAFG00000019346.5:ENSCAFT00000087543.1:exon2:c.G27A:p.T9T,ENSCAFG00000019346.5:ENSCAFT00000075240.1:exon2:c.G27A:p.T9T,ENSCAFG00000019346.5:ENSCAFT00000030745.5:exon2:c.G27A:p.T9T,ENSCAFG00000019346.5:ENSCAFT00000085597.1:exon2:c.G102A:p.T34T,	ENSCAFG00000019346	SRRM2	SRRM2	chr6	38295335	38295335	G	A	-	0/1	14,3	0.2	17
12	nonsynonymous SNV	ENSCAFG00000017629.6:ENSCAFT00000046415.3:exon37:c.G5446A:p.V1816I,ENSCAFG00000017629.6:ENSCAFT00000049867.2:exon40:c.G6070A:p.V2024I,ENSCAFG00000017629.6:ENSCAFT00000027958.6:exon39:c.G5884A:p.V1962I,ENSCAFG00000017629.6:ENSCAFT00000080394.1:exon20:c.G2731A:p.V911I,ENSCAFG00000017629.6:ENSCAFT00000063075.1:exon11:c.G778A:p.V260I,	ENSCAFG00000017629	LOXHD1	LOXHD1	chr7	44819020	44819020	G	A	tolerated(0.15)	0/1	23,4	0.167	27
12	nonsynonymous SNV	ENSCAFG00000043910.1:ENSCAFT00000078320.1:exon4:c.G1111A:p.V371M,	ENSCAFG00000043910	JPH4	JPH4	chr8	3800262	3800262	C	T	deleterious(0.04)	0|1	22,3	0.143	25
12	nonsynonymous SNV	ENSCAFG00000005732.6:ENSCAFT00000009236.6:exon24:c.C6071T:p.A2024V,	ENSCAFG00000005732	BAHCC1	BAHCC1	chr9	684711	684711	G	A	tolerated(0.17)	0/1	11,3	0.25	14
12	synonymous SNV	ENSCAFG00000004699.5:ENSCAFT00000007565.4:exon2:c.T336C:p.S112S,	ENSCAFG00000004699	MRPL58	MRPL58	chr9	5450837	5450837	A	G	-	0/1	50,6	0.093	56
12	nonsynonymous SNV	ENSCAFG00000013774.4:ENSCAFT00000075933.1:exon1:c.G3A:p.M1I,ENSCAFG00000013774.4:ENSCAFT00000021854.4:exon1:c.G3A:p.M1I,ENSCAFG00000013774.4:ENSCAFT00000088008.1:exon1:c.G3A:p.M1I,	ENSCAFG00000013774	MAP3K14	MAP3K14	chr9	18280220	18280220	G	A	-	0/1	23,4	0.165	27
12	nonsynonymous SNV	ENSCAFG00000013774.4:ENSCAFT00000075933.1:exon1:c.C200T:p.A67V,ENSCAFG00000013774.4:ENSCAFT00000021854.4:exon1:c.C200T:p.A67V,ENSCAFG00000013774.4:ENSCAFT00000088008.1:exon1:c.C200T:p.A67V,	ENSCAFG00000013774	MAP3K14	MAP3K14	chr9	18280417	18280417	C	T	deleterious(0)	0/1	28,8	0.269	36
12	nonsynonymous SNV	ENSCAFG00000014228.5:ENSCAFT00000022598.3:exon8:c.G820A:p.V274I,	ENSCAFG00000014228	SLC4A1	SLC4A1	chr9	19150178	19150178	G	A	deleterious(0.03)	0/1	36,4	0.107	40
12	nonsynonymous SNV	ENSCAFG00000011393.4:ENSCAFT00000018100.4:exon2:c.G487A:p.A163T,	ENSCAFG00000011393	CLDN34	CLDN34	chrX	6657403	6657403	G	A	tolerated(0.73)	0/1	89,4	0.056	93
13	nonsynonymous SNV	ENSCAFG00000040985.1:ENSCAFT00000070867.1:exon3:c.G1103A:p.R368Q,ENSCAFG00000040985.1:ENSCAFT00000081298.1:exon3:c.G1103A:p.R368Q,ENSCAFG00000040985.1:ENSCAFT00000075755.1:exon3:c.G1103A:p.R368Q,	ENSCAFG00000040985	OPRM1	OPRM1	chr1	44020472	44020472	G	A	deleterious(0.04)	0/1	77,17	0.192	94
13	synonymous SNV	ENSCAFG00000000911.4:ENSCAFT00000001414.3:exon6:c.C2373T:p.L791L,ENSCAFG00000000911.4:ENSCAFT00000084260.1:exon5:c.C2160T:p.L720L,	ENSCAFG00000000911	GPRC6A	GPRC6A	chr1	57191804	57191804	G	A	-	0/1	78,21	0.21	99
13	nonsynonymous SNV	ENSCAFG00000001246.4:ENSCAFT00000068949.1:exon20:c.G2933A:p.R978Q,ENSCAFG00000001246.4:ENSCAFT00000001978.4:exon20:c.G2741A:p.R914Q,ENSCAFG00000001246.4:ENSCAFT00000066660.1:exon20:c.G2936A:p.R979Q,	ENSCAFG00000001246	PTCH1	PTCH1	chr1	71294269	71294269	G	A	tolerated(0.27)	0/1	100,29	0.202	129
13	nonsynonymous SNV	ENSCAFG00000002744.5:ENSCAFT00000004367.5:exon13:c.G1903A:p.A635T,ENSCAFG00000002744.5:ENSCAFT00000004373.4:exon13:c.G1942A:p.A648T,	ENSCAFG00000002744	SPTBN1	SPTBN1	chr10	55527105	55527105	G	A	tolerated(0.19)	0/1	75,4	0.076	79
13	nonsynonymous SNV	ENSCAFG00000001406.4:ENSCAFT00000002178.4:exon17:c.A1921G:p.R641G,	ENSCAFG00000001406	MKLN1	MKLN1	chr14	5657503	5657503	T	C	deleterious(0.02)	0/1	56,5	0.085	61
13	nonsynonymous SNV	ENSCAFG00000001754.4:ENSCAFT00000087472.1:exon6:c.C753G:p.N251K,ENSCAFG00000001754.4:ENSCAFT00000002746.4:exon11:c.C1290G:p.N430K,ENSCAFG00000001754.4:ENSCAFT00000062245.1:exon12:c.C1206G:p.N402K,ENSCAFG00000001754.4:ENSCAFT00000080986.1:exon6:c.C456G:p.N152K,ENSCAFG00000001754.4:ENSCAFT00000082826.1:exon8:c.C1125G:p.N375K,ENSCAFG00000001754.4:ENSCAFT00000086242.1:exon7:c.C909G:p.N303K,	ENSCAFG00000001754	POT1	POT1	chr14	11043429	11043429	C	G	deleterious(0.02)	0/1	43,17	0.306	60
13	nonsynonymous SNV	ENSCAFG00000002506.4:ENSCAFT00000003953.4:exon1:c.A44G:p.D15G,	ENSCAFG00000002506	FERD3L	FERD3L	chr14	33414735	33414735	T	C	tolerated(0.14)	0/1	45,11	0.204	56
13	nonsynonymous SNV	ENSCAFG00000003990.4:ENSCAFT00000006395.4:exon9:c.A964G:p.R322G,ENSCAFG00000003990.4:ENSCAFT00000068554.1:exon9:c.A880G:p.R294G,	ENSCAFG00000003990	KDM7A	KDM7A	chr16	8790980	8790980	A	G	deleterious(0)	0/1	63,5	0.085	68
13	nonsynonymous SNV	ENSCAFG00000003228.4:ENSCAFT00000005177.4:exon11:c.G1273A:p.V425I,	ENSCAFG00000003228	PXDN	PXDN	chr17	857842	857842	C	T	tolerated(0.07)	0/1	56,11	0.17	67
13	nonsynonymous SNV	ENSCAFG00000005348.4:ENSCAFT00000008624.4:exon1:c.G132C:p.E44D,	ENSCAFG00000005348	EHD3	EHD3	chr17	24828503	24828503	G	C	tolerated(1)	0/1	66,17	0.22	83
13	nonsynonymous SNV	ENSCAFG00000005348.4:ENSCAFT00000008624.4:exon1:c.A173C:p.K58T,	ENSCAFG00000005348	EHD3	EHD3	chr17	24828544	24828544	A	C	deleterious(0.01)	0/1	67,21	0.222	88
13	nonsynonymous SNV	ENSCAFG00000007174.4:ENSCAFT00000011494.4:exon1:c.G119T:p.R40L,ENSCAFG00000007174.4:ENSCAFT00000085738.1:exon1:c.G119T:p.R40L,ENSCAFG00000007174.4:ENSCAFT00000060855.1:exon1:c.G119T:p.R40L,	ENSCAFG00000007174	POLR1B	POLR1B	chr17	36774659	36774659	G	T	deleterious(0.05)	0/1	68,4	0.077	72
13	nonsynonymous SNV	ENSCAFG00000003334.5:ENSCAFT00000005349.5:exon8:c.C6383T:p.P2128L,ENSCAFG00000003334.5:ENSCAFT00000044856.2:exon9:c.C7217T:p.P2406L,	ENSCAFG00000003334	ABCA13	-	chr18	186051	186051	C	T	tolerated(0.16)	0/1	68,17	0.206	85
13	synonymous SNV	ENSCAFG00000003891.4:ENSCAFT00000063998.1:exon5:c.C534T:p.Y178Y,ENSCAFG00000003891.4:ENSCAFT00000080631.1:exon5:c.C534T:p.Y178Y,ENSCAFG00000003891.4:ENSCAFT00000076710.1:exon4:c.C423T:p.Y141Y,ENSCAFG00000003891.4:ENSCAFT00000006271.4:exon5:c.C534T:p.Y178Y,	ENSCAFG00000003891	SLC26A4	SLC26A4	chr18	12930563	12930563	G	A	-	0/1	73,26	0.276	99
13	nonsynonymous SNV	ENSCAFG00000010458.5:ENSCAFT00000016614.4:exon3:c.G497A:p.R166Q,	ENSCAFG00000010458	SHANK2	SHANK2	chr18	47648981	47648981	G	A	deleterious(0)	0/1	103,29	0.233	132
13	nonsynonymous SNV	ENSCAFG00000015314.5:ENSCAFT00000024347.5:exon41:c.G5842A:p.V1948I,ENSCAFG00000015314.5:ENSCAFT00000066329.1:exon38:c.G5575A:p.V1859I,ENSCAFG00000015314.5:ENSCAFT00000081033.1:exon41:c.G5842A:p.V1948I,	ENSCAFG00000015314	UBR4	UBR4	chr2	79456702	79456702	G	A	tolerated(0.53)	0/1	86,16	0.182	102
13	frameshift insertion	ENSCAFG00000013392.4:ENSCAFT00000060515.1:exon3:c.392dupC:p.S131fs,ENSCAFG00000013392.4:ENSCAFT00000021260.4:exon3:c.392dupC:p.S131fs,ENSCAFG00000013392.4:ENSCAFT00000064752.1:exon3:c.392dupC:p.S131fs,ENSCAFG00000013392.4:ENSCAFT00000072365.1:exon3:c.392dupC:p.S131fs,ENSCAFG00000013392.4:ENSCAFT00000077709.1:exon3:c.392dupC:p.S131fs,ENSCAFG00000013392.4:ENSCAFT00000071377.1:exon3:c.392dupC:p.S131…	ENSCAFG00000013392	SETD2	SETD2	chr20	41710101	41710101	-	C	-	0/1	55,12	0.196	67
13	nonsynonymous SNV	ENSCAFG00000014954.4:ENSCAFT00000080164.1:exon3:c.A416T:p.K139M,ENSCAFG00000014954.4:ENSCAFT00000068652.1:exon3:c.A416T:p.K139M,ENSCAFG00000014954.4:ENSCAFT00000077417.1:exon3:c.A416T:p.K139M,ENSCAFG00000014954.4:ENSCAFT00000023726.4:exon3:c.A416T:p.K139M,ENSCAFG00000014954.4:ENSCAFT00000073340.1:exon3:c.A416T:p.K139M,ENSCAFG00000014954.4:ENSCAFT00000066382.1:exon3:c.A416T:p.K139M,ENSCAFG00000014…	ENSCAFG00000014954	MPV17L2	MPV17L2	chr20	44803344	44803344	T	A	deleterious(0)	0/1	62,4	0.085	66
13	nonsynonymous SNV	ENSCAFG00000031469.2:ENSCAFT00000064151.1:exon2:c.A554G:p.Q185R,	ENSCAFG00000031469	-	-	chr20	56210706	56210706	A	G	tolerated(0.87)	0/1	88,11	0.12	99
13	synonymous SNV	ENSCAFG00000029882.2:ENSCAFT00000043297.2:exon1:c.G468A:p.Q156Q,	ENSCAFG00000029882	MISP	MISP	chr20	57842698	57842698	C	T	-	0/1	75,4	0.061	79
13	nonsynonymous SNV	ENSCAFG00000005074.5:ENSCAFT00000008331.5:exon31:c.G4382A:p.R1461H,ENSCAFG00000005074.5:ENSCAFT00000008307.4:exon32:c.G4259A:p.R1420H,ENSCAFG00000005074.5:ENSCAFT00000073157.1:exon32:c.G4259A:p.R1420H,	ENSCAFG00000005074	MYO7A	MYO7A	chr21	21559879	21559879	C	T	tolerated(0.07)	0/1	137,28	0.188	165
13	synonymous SNV	ENSCAFG00000007573.4:ENSCAFT00000069395.1:exon6:c.G555A:p.S185S,ENSCAFG00000007562.4:ENSCAFT00000012116.4:exon8:c.C1227T:p.S409S,ENSCAFG00000007562.4:ENSCAFT00000066059.1:exon8:c.C1200T:p.S400S,	ENSCAFG00000007573	RNF141	RNF141	chr21	33645449	33645449	C	T	-	0/1	64,5	0.08	69
13	synonymous SNV	ENSCAFG00000048270.1:ENSCAFT00000076241.1:exon1:c.G255A:p.T85T,	ENSCAFG00000048270	-	-	chr22	13959476	13959476	G	A	-	0/1	90,31	0.231	121
13	synonymous SNV	ENSCAFG00000005902.5:ENSCAFT00000009534.4:exon17:c.T2205C:p.I735I,ENSCAFG00000005902.5:ENSCAFT00000049644.3:exon16:c.T2130C:p.I710I,ENSCAFG00000005902.5:ENSCAFT00000060421.1:exon16:c.T2004C:p.I668I,	ENSCAFG00000005902	NALCN	NALCN	chr22	50906593	50906593	A	G	-	0/1	87,14	0.15	101
13	synonymous SNV	ENSCAFG00000005332.4:ENSCAFT00000059587.1:exon11:c.T969C:p.I323I,ENSCAFG00000005332.4:ENSCAFT00000092092.1:exon10:c.T954C:p.I318I,ENSCAFG00000005332.4:ENSCAFT00000008588.4:exon2:c.T282C:p.I94I,ENSCAFG00000005332.4:ENSCAFT00000092171.1:exon9:c.T879C:p.I293I,ENSCAFG00000005332.4:ENSCAFT00000070530.1:exon10:c.T894C:p.I298I,ENSCAFG00000005332.4:ENSCAFT00000087712.1:exon10:c.T954C:p.I318I,ENSCAFG00000…	ENSCAFG00000005332	NKTR	NKTR	chr23	11768669	11768669	T	C	-	0/1	20,3	0.158	23
13	nonsynonymous SNV	ENSCAFG00000005690.3:ENSCAFT00000009177.3:exon3:c.G283A:p.V95M,	ENSCAFG00000005690	LAMP5	LAMP5	chr24	12692522	12692522	C	T	tolerated(0.28)	0/1	62,13	0.187	75
13	nonsynonymous SNV	ENSCAFG00000007219.5:ENSCAFT00000062905.1:exon5:c.T1666G:p.F556V,ENSCAFG00000007219.5:ENSCAFT00000062466.1:exon6:c.T1768G:p.F590V,ENSCAFG00000007219.5:ENSCAFT00000011561.5:exon6:c.T1768G:p.F590V,ENSCAFG00000007219.5:ENSCAFT00000068606.1:exon6:c.T1768G:p.F590V,	ENSCAFG00000007219	ASXL1	KIF3B	chr24	21699358	21699358	T	G	deleterious(0)	0/1	61,29	0.304	90
13	synonymous SNV	ENSCAFG00000012226.5:ENSCAFT00000019420.5:exon37:c.G7725A:p.T2575T,ENSCAFG00000012226.5:ENSCAFT00000019426.4:exon34:c.G5904A:p.T1968T,ENSCAFG00000012226.5:ENSCAFT00000084677.1:exon36:c.G7107A:p.T2369T,ENSCAFG00000012226.5:ENSCAFT00000085717.1:exon34:c.G5901A:p.T1967T,ENSCAFG00000012226.5:ENSCAFT00000019411.5:exon36:c.G7713A:p.T2571T,	ENSCAFG00000012226	COL6A3	COL6A3	chr25	47990243	47990243	C	T	-	0/1	54,19	0.26	73
13	nonsynonymous SNV	ENSCAFG00000015750.5:ENSCAFT00000024958.5:exon7:c.T2477C:p.M826T,ENSCAFG00000015750.5:ENSCAFT00000078993.1:exon7:c.T1541C:p.M514T,	ENSCAFG00000015750	IQSEC3	IQSEC3	chr27	42238268	42238268	T	C	deleterious(0)	0/1	25,4	0.124	29
13	nonsynonymous SNV	ENSCAFG00000010593.4:ENSCAFT00000070041.1:exon5:c.G548C:p.R183P,ENSCAFG00000010593.4:ENSCAFT00000071091.1:exon5:c.G548C:p.R183P,ENSCAFG00000010593.4:ENSCAFT00000016832.4:exon4:c.G908C:p.R303P,ENSCAFG00000010593.4:ENSCAFT00000077682.1:exon5:c.G656C:p.R219P,ENSCAFG00000010593.4:ENSCAFT00000081267.1:exon4:c.G449C:p.R150P,	ENSCAFG00000010593	GSTO1	GSTO1	chr28	16577796	16577796	G	C	deleterious(0)	0/1	51,9	0.209	60
13	synonymous SNV	ENSCAFG00000008374.5:ENSCAFT00000061625.1:exon3:c.T192C:p.R64R,ENSCAFG00000008374.5:ENSCAFT00000082722.1:exon3:c.T267C:p.R89R,ENSCAFG00000008374.5:ENSCAFT00000013308.4:exon3:c.T267C:p.R89R,ENSCAFG00000008374.5:ENSCAFT00000036048.4:exon3:c.T267C:p.R89R,	ENSCAFG00000008374	CCNH	CCNH	chr3	21050403	21050403	T	C	-	0/1	63,17	0.183	80
13	nonsynonymous SNV	ENSCAFG00000009083.4:ENSCAFT00000014457.4:exon8:c.G2167A:p.A723T,	ENSCAFG00000009083	DISP2	DISP2	chr30	7549940	7549940	G	A	tolerated(0.19)	0/1	74,4	0.05	78
13	nonsynonymous SNV	ENSCAFG00000010769.4:ENSCAFT00000091885.1:exon15:c.T2171A:p.L724H,ENSCAFG00000010769.4:ENSCAFT00000060197.1:exon15:c.T2171A:p.L724H,ENSCAFG00000010769.4:ENSCAFT00000074665.1:exon14:c.T2084A:p.L695H,ENSCAFG00000010769.4:ENSCAFT00000017140.4:exon15:c.T2171A:p.L724H,ENSCAFG00000010769.4:ENSCAFT00000084028.1:exon14:c.T2000A:p.L667H,	ENSCAFG00000010769	MANBA	MANBA	chr32	24058803	24058803	A	T	deleterious(0)	0/1	15,4	0.2	19
13	nonsynonymous SNV	ENSCAFG00000010902.4:ENSCAFT00000076843.1:exon11:c.G2158A:p.V720M,ENSCAFG00000010902.4:ENSCAFT00000047885.2:exon10:c.G2161A:p.V721M,ENSCAFG00000010902.4:ENSCAFT00000080537.1:exon11:c.G2008A:p.V670M,ENSCAFG00000010902.4:ENSCAFT00000017338.4:exon10:c.G2005A:p.V669M,	ENSCAFG00000010902	SLC9A3	SLC9A3	chr34	11784712	11784712	G	A	deleterious_low_confidence(0)	0/1	104,29	0.216	133
13	nonsynonymous SNV	ENSCAFG00000024882.4:ENSCAFT00000046988.3:exon6:c.C1238T:p.T413M,ENSCAFG00000024882.4:ENSCAFT00000011360.4:exon4:c.C458T:p.T153M,ENSCAFG00000024882.4:ENSCAFT00000079569.1:exon6:c.C1202T:p.T401M,	ENSCAFG00000024882	-	MYLK4	chr35	3020098	3020098	G	A	tolerated(0.1)	0/1	79,16	0.191	95
13	synonymous SNV	ENSCAFG00000009450.3:ENSCAFT00000015026.3:exon1:c.C348T:p.G116G,	ENSCAFG00000009450	BTG2	BTG2	chr38	71283	71283	C	T	-	0/1	60,4	0.068	64
13	frameshift deletion	ENSCAFG00000030013.2:ENSCAFT00000048475.2:exon5:c.113_123del:p.A38fs,	ENSCAFG00000030013	RHEX	RHEX	chr38	2431352	2431362	CCAAGAAGAGT	-	-	0/1	49,11	0.214	60
13	synonymous SNV	ENSCAFG00000010731.4:ENSCAFT00000017072.4:exon1:c.C93T:p.A31A,	ENSCAFG00000010731	USH2A	USH2A	chr38	11750352	11750352	G	A	-	0/1	26,9	0.259	35
13	nonsynonymous SNV	ENSCAFG00000011231.5:ENSCAFT00000017844.5:exon5:c.G639T:p.E213D,ENSCAFG00000011231.5:ENSCAFT00000089361.1:exon5:c.G639T:p.E213D,ENSCAFG00000011231.5:ENSCAFT00000088960.1:exon5:c.G639T:p.E213D,	ENSCAFG00000011231	LYST	LYST	chr4	4149573	4149573	G	T	tolerated(0.51)	0/1	101,4	0.051	105
13	nonsynonymous SNV	ENSCAFG00000018345.5:ENSCAFT00000073692.1:exon3:c.C286T:p.R96W,ENSCAFG00000018345.5:ENSCAFT00000083351.1:exon3:c.C286T:p.R96W,ENSCAFG00000018345.5:ENSCAFT00000029146.5:exon3:c.C286T:p.R96W,ENSCAFG00000018345.5:ENSCAFT00000048142.2:exon3:c.C388T:p.R130W,ENSCAFG00000018345.5:ENSCAFT00000092195.1:exon3:c.C286T:p.R96W,ENSCAFG00000018345.5:ENSCAFT00000078022.1:exon3:c.C193T:p.R65W,	ENSCAFG00000018345	HTR4	HTR4	chr4	60277375	60277375	C	T	tolerated(0.24)	0/1	84,43	0.33	127
13	nonsynonymous SNV	ENSCAFG00000016714.4:ENSCAFT00000086831.1:exon5:c.G638A:p.R213Q,ENSCAFG00000016714.4:ENSCAFT00000026465.4:exon7:c.G707A:p.R236Q,ENSCAFG00000016714.4:ENSCAFT00000081814.1:exon7:c.G899A:p.R300Q,	ENSCAFG00000016714	TP53	TP53	chr5	32563391	32563391	C	T	deleterious(0)	0/1	67,8	0.121	75
13	nonsynonymous SNV	ENSCAFG00000017460.5:ENSCAFT00000027662.4:exon31:c.C4510T:p.R1504W,	ENSCAFG00000017460	MYH13	MYH13	chr5	34628045	34628045	G	A	deleterious(0.01)	0/1	128,23	0.157	151
13	synonymous SNV	ENSCAFG00000018195.5:ENSCAFT00000050148.2:exon8:c.G561A:p.S187S,ENSCAFG00000018195.5:ENSCAFT00000028907.5:exon8:c.G651A:p.S217S,	ENSCAFG00000018195	SLC47A1	SLC47A1	chr5	40664336	40664336	C	T	-	0/1	76,30	0.282	106
13	nonsynonymous SNV	ENSCAFG00000018795.4:ENSCAFT00000073461.1:exon5:c.T263A:p.F88Y,ENSCAFG00000018795.4:ENSCAFT00000071140.1:exon5:c.T263A:p.F88Y,ENSCAFG00000018795.4:ENSCAFT00000093059.1:exon5:c.T263A:p.F88Y,ENSCAFG00000018795.4:ENSCAFT00000065117.1:exon5:c.T263A:p.F88Y,ENSCAFG00000018795.4:ENSCAFT00000029839.4:exon5:c.T263A:p.F88Y,	ENSCAFG00000018795	PARN	PARN	chr6	28632419	28632419	T	A	tolerated(0.37)	0/1	101,8	0.062	109
13	nonsynonymous SNV	ENSCAFG00000016089.5:ENSCAFT00000025541.4:exon18:c.G2341A:p.A781T,	ENSCAFG00000016089	PARP1	PARP1	chr7	38538789	38538789	G	A	deleterious(0)	0/1	97,30	0.248	127
13	nonsynonymous SNV	ENSCAFG00000018575.5:ENSCAFT00000063025.1:exon16:c.G2395A:p.V799I,ENSCAFG00000018575.5:ENSCAFT00000082224.1:exon16:c.G2332A:p.V778I,ENSCAFG00000018575.5:ENSCAFT00000059995.1:exon13:c.G1750A:p.V584I,ENSCAFG00000018575.5:ENSCAFT00000061580.1:exon18:c.G2380A:p.V794I,ENSCAFG00000018575.5:ENSCAFT00000084461.1:exon17:c.G2431A:p.V811I,	ENSCAFG00000018575	EPB41L3	EPB41L3	chr7	71782202	71782202	C	T	deleterious_low_confidence(0)	0/1	208,38	0.165	246
13	nonsynonymous SNV	ENSCAFG00000012553.5:ENSCAFT00000072610.1:exon10:c.A1123G:p.R375G,ENSCAFG00000012553.5:ENSCAFT00000019949.5:exon9:c.A1120G:p.R374G,ENSCAFG00000012553.5:ENSCAFT00000081655.1:exon9:c.A1099G:p.R367G,ENSCAFG00000012553.5:ENSCAFT00000043635.2:exon9:c.A1057G:p.R353G,	ENSCAFG00000012553	PRKD1	PRKD1	chr8	9057121	9057121	T	C	deleterious(0.02)	0/1	136,6	0.049	142
13	nonsynonymous SNV	ENSCAFG00000017701.4:ENSCAFT00000028082.4:exon24:c.G4264T:p.D1422Y,ENSCAFG00000017701.4:ENSCAFT00000072663.1:exon21:c.G4108T:p.D1370Y,ENSCAFG00000017701.4:ENSCAFT00000061717.1:exon22:c.G4264T:p.D1422Y,	ENSCAFG00000017701	DICER1	DICER1	chr8	63981035	63981035	C	A	deleterious_low_confidence(0)	0/1	136,39	0.218	175
13	nonsynonymous SNV	ENSCAFG00000046771.1:ENSCAFT00000077325.1:exon2:c.C70G:p.Q24E,	ENSCAFG00000046771	-	IGHV4-4	chr8	73028693	73028693	G	C	deleterious(0.01)	0/1	28,3	0.158	31
13	nonsynonymous SNV	ENSCAFG00000016530.4:ENSCAFT00000026180.4:exon2:c.G109T:p.A37S,ENSCAFG00000016530.4:ENSCAFT00000088095.1:exon2:c.G109T:p.A37S,ENSCAFG00000016530.4:ENSCAFT00000065601.1:exon2:c.G109T:p.A37S,ENSCAFG00000016530.4:ENSCAFT00000069918.1:exon2:c.G109T:p.A37S,ENSCAFG00000016530.4:ENSCAFT00000091377.1:exon2:c.G109T:p.A37S,	ENSCAFG00000016530	PLXDC1	PLXDC1	chr9	23218929	23218929	G	T	tolerated(0.16)	0/1	124,19	0.127	143
13	nonsynonymous SNV	ENSCAFG00000019897.4:ENSCAFT00000084780.1:exon14:c.C5962T:p.P1988S,ENSCAFG00000019897.4:ENSCAFT00000031656.4:exon14:c.C5962T:p.P1988S,	ENSCAFG00000019897	SETX	SETX	chr9	51951858	51951858	C	T	deleterious(0)	0/1	107,7	0.059	114
13	frameshift deletion	ENSCAFG00000019908.4:ENSCAFT00000070320.1:exon14:c.2329_2330del:p.R777fs,ENSCAFG00000019908.4:ENSCAFT00000031676.4:exon14:c.2329_2330del:p.R777fs,ENSCAFG00000019908.4:ENSCAFT00000088857.1:exon14:c.2329_2330del:p.R777fs,	ENSCAFG00000019908	PRRC2B	PRRC2B	chr9	52663467	52663481	AGTTTCATCTCACCT	-	-	0/1	77,14	0.183	91
13	stopgain	ENSCAFG00000014589.6:ENSCAFT00000023217.4:exon9:c.C697T:p.Q233X,ENSCAFG00000014589.6:ENSCAFT00000074698.1:exon9:c.C697T:p.Q233X,ENSCAFG00000014589.6:ENSCAFT00000093247.1:exon9:c.C697T:p.Q233X,ENSCAFG00000014589.6:ENSCAFT00000068439.1:exon8:c.C664T:p.Q222X,ENSCAFG00000014589.6:ENSCAFT00000073366.1:exon9:c.C697T:p.Q233X,ENSCAFG00000014589.6:ENSCAFT00000061253.1:exon9:c.C697T:p.Q233X,ENSCAFG00000014…	ENSCAFG00000014589	KDM6A	KDM6A	chrX	38897271	38897271	C	T	-	0/1	39,4	0.129	43
13	nonsynonymous SNV	ENSCAFG00000014589.6:ENSCAFT00000023217.4:exon24:c.G3463T:p.V1155F,ENSCAFG00000014589.6:ENSCAFT00000074698.1:exon25:c.G3619T:p.V1207F,ENSCAFG00000014589.6:ENSCAFT00000093247.1:exon23:c.G3328T:p.V1110F,ENSCAFG00000014589.6:ENSCAFT00000068439.1:exon22:c.G3328T:p.V1110F,ENSCAFG00000014589.6:ENSCAFT00000073366.1:exon25:c.G3619T:p.V1207F,ENSCAFG00000014589.6:ENSCAFT00000061253.1:exon24:c.G3484T:p.V116…	ENSCAFG00000014589	KDM6A	KDM6A	chrX	38934369	38934369	G	T	deleterious(0)	0/1	77,7	0.115	84
13	frameshift deletion	ENSCAFG00000015744.5:ENSCAFT00000075664.1:exon16:c.1395_1405del:p.V465fs,ENSCAFG00000015744.5:ENSCAFT00000024952.5:exon16:c.1395_1405del:p.V465fs,ENSCAFG00000015744.5:ENSCAFT00000084649.1:exon13:c.1089_1099del:p.V363fs,ENSCAFG00000015744.5:ENSCAFT00000091238.1:exon13:c.1215_1225del:p.V405fs,ENSCAFG00000015744.5:ENSCAFT00000073586.1:exon15:c.1368_1378del:p.V456fs,ENSCAFG00000015744.5:ENSCAFT000000…	ENSCAFG00000015744	GRIPAP1	GRIPAP1	chrX	42129729	42129739	AGCGGGCACGC	-	-	0/1	130,31	0.213	161
13	nonsynonymous SNV	ENSCAFG00000017519.4:ENSCAFT00000070447.1:exon1:c.G4A:p.A2T,ENSCAFG00000017519.4:ENSCAFT00000027750.4:exon1:c.G4A:p.A2T,	ENSCAFG00000017519	TNMD	TNMD	chrX	74459333	74459333	G	A	tolerated_low_confidence(0.05)	0/1	46,14	0.234	60
13	nonsynonymous SNV	ENSCAFG00000018717.4:ENSCAFT00000029709.4:exon15:c.A2192C:p.K731T,	ENSCAFG00000018717	-	UTP14C	chrX	101117092	101117092	A	C	tolerated(0.06)	0/1	93,29	0.244	122
13	nonsynonymous SNV	ENSCAFG00000012976.4:ENSCAFT00000020594.4:exon3:c.A122G:p.H41R,	ENSCAFG00000012976	NARF	NARF	chrUn_JH373243	63426	63426	A	G	-	0/1	56,10	0.167	66
14	nonsynonymous SNV	ENSCAFG00000000086.4:ENSCAFT00000000141.4:exon2:c.C515T:p.A172V,	ENSCAFG00000000086	CDH2-	CDH2-	chr1	15225638	15225638	G	A	tolerated(0.06)	0/1	169,5	0.044	174
14	nonsynonymous SNV	ENSCAFG00000000430.4:ENSCAFT00000000680.4:exon2:c.C440T:p.A147V,ENSCAFG00000000430.4:ENSCAFT00000060440.1:exon1:c.C440T:p.A147V,	ENSCAFG00000000430	ESR1	ESR1	chr1	42084620	42084620	C	T	tolerated(0.1)	0/1	47,4	0.083	51
14	nonsynonymous SNV	ENSCAFG00000003840.4:ENSCAFT00000006175.4:exon5:c.C983T:p.A328V,	ENSCAFG00000003840	-	AC--8687.4	chr1	107381969	107381969	C	T	tolerated_low_confidence(0.41)	0/1	26,4	0.136	30
14	frameshift deletion	ENSCAFG00000004858.4:ENSCAFT00000082880.1:exon1:c.110delG:p.G37fs,	ENSCAFG00000004858	CIC	CIC	chr1	112104973	112104973	C	-	-	0/1	95,55	0.375	150
14	nonsynonymous SNV	ENSCAFG00000030899.2:ENSCAFT00000077492.1:exon4:c.G2753C:p.S918T,ENSCAFG00000030899.2:ENSCAFT00000068972.1:exon2:c.G2741C:p.S914T,ENSCAFG00000030899.2:ENSCAFT00000048665.2:exon2:c.G2630C:p.S877T,	ENSCAFG00000030899	ZFP62	ZFP62	chr11	176365	176365	C	G	deleterious(0.04)	0/1	189,29	0.131	218
14	nonsynonymous SNV	ENSCAFG00000001460.4:ENSCAFT00000066900.1:exon29:c.G4318A:p.V1440I,ENSCAFG00000001460.4:ENSCAFT00000002280.4:exon27:c.G4576A:p.V1526I,ENSCAFG00000001460.4:ENSCAFT00000078718.1:exon24:c.G4273A:p.V1425I,ENSCAFG00000001460.4:ENSCAFT00000089147.1:exon25:c.G4465A:p.V1489I,ENSCAFG00000001460.4:ENSCAFT00000061373.1:exon22:c.G3352A:p.V1118I,ENSCAFG00000001460.4:ENSCAFT00000078387.1:exon29:c.G4582A:p.V152…	ENSCAFG00000001460	PTPRD	PTPRD	chr11	29151067	29151067	C	T	deleterious(0)	0/1	174,97	0.349	271
14	nonsynonymous SNV	ENSCAFG00000002413.5:ENSCAFT00000043203.3:exon40:c.C7040T:p.T2347M,ENSCAFG00000002413.5:ENSCAFT00000065669.1:exon40:c.C7040T:p.T2347M,ENSCAFG00000002413.5:ENSCAFT00000062154.1:exon39:c.C7004T:p.T2335M,ENSCAFG00000002413.5:ENSCAFT00000085899.1:exon37:c.C6590T:p.T2197M,ENSCAFG00000002413.5:ENSCAFT00000084556.1:exon40:c.C6209T:p.T2070M,ENSCAFG00000002413.5:ENSCAFT00000065491.1:exon40:c.C6209T:p.T207…	ENSCAFG00000002413	DST	DST	chr12	23850167	23850167	G	A	-	0/1	63,28	0.306	91
14	nonsynonymous SNV	ENSCAFG00000000563.5:ENSCAFT00000060550.1:exon3:c.T296G:p.L99R,ENSCAFG00000000563.5:ENSCAFT00000048779.2:exon2:c.T296G:p.L99R,	ENSCAFG00000000563	SNX31	SNX31	chr13	2391338	2391338	A	C	tolerated(0.05)	0/1	79,22	0.235	101
14	stopgain	ENSCAFG00000001433.5:ENSCAFT00000083528.1:exon26:c.C3094T:p.Q1032X,ENSCAFG00000001433.5:ENSCAFT00000060448.1:exon25:c.C3010T:p.Q1004X,ENSCAFG00000001433.5:ENSCAFT00000082428.1:exon25:c.C3013T:p.Q1005X,ENSCAFG00000001433.5:ENSCAFT00000002240.4:exon27:c.C3556T:p.Q1186X,ENSCAFG00000001433.5:ENSCAFT00000065106.1:exon27:c.C3154T:p.Q1052X,ENSCAFG00000001433.5:ENSCAFT00000047267.3:exon25:c.C3157T:p.Q105…	ENSCAFG00000001433	PLEC	PLEC	chr13	37463540	37463540	G	A	-	0|1	12,3	0.25	15
14	nonsynonymous SNV	ENSCAFG00000007773.4:ENSCAFT00000012411.4:exon5:c.C514T:p.L172F,ENSCAFG00000007773.4:ENSCAFT00000085645.1:exon3:c.C358T:p.L120F,	ENSCAFG00000007773	TMEM184C	TMEM184C	chr15	45965152	45965152	C	T	deleterious(0)	0/1	116,40	0.258	156
14	nonsynonymous SNV	ENSCAFG00000025371.3:ENSCAFT00000006189.4:exon13:c.G1469A:p.R490H,	ENSCAFG00000025371	MGAM2	MGAM2	chr16	7089329	7089329	C	T	tolerated(0.28)	0/1	53,11	0.175	64
14	synonymous SNV	ENSCAFG00000003550.5:ENSCAFT00000005699.5:exon2:c.C813T:p.D271D,	ENSCAFG00000003550	INHBA	INHBA	chr18	8283332	8283332	C	T	-	0/1	21,9	0.338	30
14	nonsynonymous SNV	ENSCAFG00000007196.5:ENSCAFT00000067807.1:exon3:c.C2857T:p.R953W,ENSCAFG00000007196.5:ENSCAFT00000044036.3:exon4:c.C1138T:p.R380W,ENSCAFG00000007196.5:ENSCAFT00000011539.4:exon5:c.C2488T:p.R830W,	ENSCAFG00000007196	KIAA1549L	KIAA1549L	chr18	34140723	34140723	G	A	deleterious(0)	0/1	81,32	0.301	113
14	nonsynonymous SNV	ENSCAFG00000014216.4:ENSCAFT00000067955.1:exon3:c.G577A:p.E193K,ENSCAFG00000014216.4:ENSCAFT00000022575.4:exon3:c.G577A:p.E193K,ENSCAFG00000014216.4:ENSCAFT00000074237.1:exon3:c.G577A:p.E193K,	ENSCAFG00000014216	MAP4K2	MAP4K2	chr18	52354134	52354134	G	A	deleterious(0)	0/1	58,20	0.264	78
14	nonsynonymous SNV	ENSCAFG00000015809.3:ENSCAFT00000025051.3:exon6:c.A455T:p.K152I,	ENSCAFG00000015809	MTA2	MTA2	chr18	54041689	54041689	A	T	deleterious(0)	0/1	77,43	0.372	120
14	nonsynonymous SNV	ENSCAFG00000004022.5:ENSCAFT00000006460.4:exon52:c.T9172G:p.Y3058D,ENSCAFG00000004022.5:ENSCAFT00000064593.1:exon51:c.T9121G:p.Y3041D,ENSCAFG00000004022.5:ENSCAFT00000036772.4:exon52:c.T9172G:p.Y3058D,ENSCAFG00000004022.5:ENSCAFT00000063269.1:exon52:c.T9172G:p.Y3058D,	ENSCAFG00000004022	KIAA11-9	KIAA11-9	chr19	17898752	17898752	A	C	deleterious(0)	0/1	63,35	0.339	98
14	stopgain	ENSCAFG00000004689.4:ENSCAFT00000087547.1:exon8:c.G1270T:p.G424X,ENSCAFG00000004689.4:ENSCAFT00000067906.1:exon8:c.G1270T:p.G424X,ENSCAFG00000004689.4:ENSCAFT00000090902.1:exon7:c.G1126T:p.G376X,ENSCAFG00000004689.4:ENSCAFT00000007551.4:exon8:c.G1270T:p.G424X,	ENSCAFG00000004689	CNTNAP5	CNTNAP5	chr19	25973897	25973897	C	A	-	0/1	68,43	0.386	111
14	nonsynonymous SNV	ENSCAFG00000004329.5:ENSCAFT00000062813.1:exon12:c.A1427C:p.N476T,ENSCAFG00000004329.5:ENSCAFT00000006944.4:exon13:c.A1505C:p.N502T,	ENSCAFG00000004329	APBB1IP	APBB1IP	chr2	7151930	7151930	T	G	tolerated_low_confidence(0.26)	0|1	85,4	0.071	89
14	nonsynonymous SNV	ENSCAFG00000004329.5:ENSCAFT00000062813.1:exon12:c.G1424T:p.G475V,ENSCAFG00000004329.5:ENSCAFT00000006944.4:exon13:c.G1502T:p.G501V,	ENSCAFG00000004329	APBB1IP	APBB1IP	chr2	7151933	7151933	C	A	tolerated_low_confidence(0.29)	0|1	85,4	0.071	89
14	synonymous SNV	ENSCAFG00000011290.4:ENSCAFT00000017969.4:exon11:c.C972T:p.F324F,	ENSCAFG00000011290	RNF123	RNF123	chr20	39573784	39573784	G	A	-	0/1	86,7	0.083	93
14	frameshift insertion	ENSCAFG00000013392.4:ENSCAFT00000060515.1:exon3:c.2023dupG:p.P674fs,ENSCAFG00000013392.4:ENSCAFT00000021260.4:exon3:c.2023dupG:p.P674fs,ENSCAFG00000013392.4:ENSCAFT00000064752.1:exon3:c.2023dupG:p.P674fs,ENSCAFG00000013392.4:ENSCAFT00000072365.1:exon3:c.2023dupG:p.P674fs,ENSCAFG00000013392.4:ENSCAFT00000077709.1:exon3:c.2023dupG:p.P674fs,ENSCAFG00000013392.4:ENSCAFT00000071377.1:exon3:c.2023dupG:…	ENSCAFG00000013392	SETD2	SETD2	chr20	41711732	41711732	-	G	-	0/1	65,57	0.442	122
14	nonsynonymous SNV	ENSCAFG00000013392.4:ENSCAFT00000060515.1:exon5:c.C4664G:p.T1555R,ENSCAFG00000013392.4:ENSCAFT00000021260.4:exon5:c.C4664G:p.T1555R,ENSCAFG00000013392.4:ENSCAFT00000064752.1:exon5:c.C4664G:p.T1555R,ENSCAFG00000013392.4:ENSCAFT00000072365.1:exon5:c.C4664G:p.T1555R,ENSCAFG00000013392.4:ENSCAFT00000077709.1:exon5:c.C4664G:p.T1555R,ENSCAFG00000013392.4:ENSCAFT00000071377.1:exon5:c.C4664G:p.T1555R,ENS…	ENSCAFG00000013392	SETD2	SETD2	chr20	41719177	41719177	C	G	deleterious(0)	0/1	56,37	0.379	93
14	nonsynonymous SNV	ENSCAFG00000014030.4:ENSCAFT00000071645.1:exon1:c.C80T:p.S27F,ENSCAFG00000014030.4:ENSCAFT00000090849.1:exon1:c.C80T:p.S27F,	ENSCAFG00000014030	LARS2	LARS2	chr20	43080937	43080937	G	A	-	0/1	17,10	0.389	27
14	synonymous SNV	ENSCAFG00000005179.4:ENSCAFT00000008360.4:exon5:c.C687T:p.S229S,ENSCAFG00000005179.4:ENSCAFT00000073290.1:exon3:c.C555T:p.S185S,ENSCAFG00000005179.4:ENSCAFT00000078535.1:exon4:c.C792T:p.S264S,	ENSCAFG00000005179	CAPN5	CAPN5	chr21	21636880	21636880	G	A	-	0/1	49,11	0.196	60
14	nonsynonymous SNV	ENSCAFG00000007259.4:ENSCAFT00000082104.1:exon11:c.A1271G:p.K424R,ENSCAFG00000007259.4:ENSCAFT00000011732.4:exon13:c.A1340G:p.K447R,	ENSCAFG00000007259	IPO7	IPO7	chr21	32731842	32731842	A	G	tolerated(0.2)	0/1	37,4	0.143	41
14	nonsynonymous SNV	ENSCAFG00000004308.4:ENSCAFT00000070787.1:exon2:c.C290G:p.A97G,ENSCAFG00000004308.4:ENSCAFT00000006908.4:exon3:c.C275G:p.A92G,ENSCAFG00000004308.4:ENSCAFT00000081323.1:exon3:c.C146G:p.A49G,	ENSCAFG00000004308	TRIM13	TRIM13	chr22	1879120	1879120	G	C	deleterious(0.03)	0|1	81,4	0.054	85
14	nonsynonymous SNV	ENSCAFG00000004902.5:ENSCAFT00000007901.4:exon24:c.A2933G:p.K978R,ENSCAFG00000004902.5:ENSCAFT00000079181.1:exon24:c.A2996G:p.K999R,ENSCAFG00000004902.5:ENSCAFT00000007906.5:exon25:c.A3101G:p.K1034R,ENSCAFG00000004902.5:ENSCAFT00000045223.3:exon26:c.A3134G:p.K1045R,	ENSCAFG00000004902	DIAPH3	DIAPH3	chr22	15736052	15736052	T	C	tolerated(0.28)	0/1	285,6	0.028	291
14	synonymous SNV	ENSCAFG00000028765.2:ENSCAFT00000049194.2:exon1:c.C582A:p.G194G,	ENSCAFG00000028765	-	CST3	chr23	53404	53404	G	T	-	0/1	9,13	0.611	22
14	nonsynonymous SNV	ENSCAFG00000005343.4:ENSCAFT00000008605.4:exon6:c.G1652A:p.R551H,	ENSCAFG00000005343	KLHL4-	KLHL4-	chr23	11818757	11818757	G	A	deleterious(0)	0/1	62,36	0.355	98
14	synonymous SNV	ENSCAFG00000008362.3:ENSCAFT00000013277.3:exon1:c.A180G:p.A60A,	ENSCAFG00000008362	SCAND1	SCAND1	chr24	24822888	24822888	T	C	-	0/1	67,38	0.358	105
14	nonsynonymous SNV	ENSCAFG00000008362.3:ENSCAFT00000013277.3:exon1:c.G20C:p.S7T,	ENSCAFG00000008362	SCAND1	SCAND1	chr24	24823048	24823048	C	G	tolerated_low_confidence(0.06)	0/1	59,20	0.263	79
14	synonymous SNV	ENSCAFG00000009672.4:ENSCAFT00000015365.4:exon6:c.T558A:p.S186S,	ENSCAFG00000009672	WNT8B	WNT8B	chr28	13209900	13209900	T	A	-	0/1	90,4	0.046	94
14	nonsynonymous SNV	ENSCAFG00000012494.5:ENSCAFT00000081548.1:exon4:c.G4330A:p.V1444M,ENSCAFG00000012494.5:ENSCAFT00000064383.1:exon3:c.G4270A:p.V1424M,ENSCAFG00000012494.5:ENSCAFT00000084041.1:exon4:c.G4330A:p.V1444M,ENSCAFG00000012494.5:ENSCAFT00000047632.3:exon4:c.G4330A:p.V1444M,ENSCAFG00000012494.5:ENSCAFT00000019866.4:exon3:c.G4255A:p.V1419M,ENSCAFG00000012494.5:ENSCAFT00000066256.1:exon4:c.G4330A:p.V1444M,	ENSCAFG00000012494	TACC2	TACC2	chr28	31798183	31798183	G	A	tolerated(0.12)	0/1	87,4	0.064	91
14	synonymous SNV	ENSCAFG00000009109.5:ENSCAFT00000014490.5:exon1:c.G2469A:p.P823P,	ENSCAFG00000009109	RBM12B	RBM12B	chr29	38635255	38635255	C	T	-	0/1	87,4	0.047	91
14	frameshift deletion	ENSCAFG00000008302.5:ENSCAFT00000013201.5:exon4:c.96_97del:p.A32fs,ENSCAFG00000008302.5:ENSCAFT00000074240.1:exon4:c.96_97del:p.A32fs,ENSCAFG00000008302.5:ENSCAFT00000044684.2:exon4:c.96_97del:p.A32fs,ENSCAFG00000008302.5:ENSCAFT00000013212.5:exon4:c.96_97del:p.A32fs,	ENSCAFG00000008302	MEF2C	MEF2C	chr3	19870485	19870486	GT	-	-	0/1	25,13	0.36	38
14	nonsynonymous SNV	ENSCAFG00000010035.4:ENSCAFT00000015966.4:exon6:c.C509T:p.S170F,ENSCAFG00000010035.4:ENSCAFT00000081450.1:exon5:c.C635T:p.S212F,	ENSCAFG00000010035	GABRA5	GABRA5	chr3	33690111	33690111	G	A	deleterious(0.01)	0/1	68,36	0.333	104
14	nonsynonymous SNV	ENSCAFG00000030702.2:ENSCAFT00000043201.2:exon7:c.C1111T:p.R371W,ENSCAFG00000030702.2:ENSCAFT00000049328.2:exon8:c.C1030T:p.R344W,	ENSCAFG00000030702	GABRB3	GABRB3	chr3	34097627	34097627	C	T	deleterious(0)	0/1	59,20	0.263	79
14	nonsynonymous SNV	ENSCAFG00000016672.4:ENSCAFT00000026403.3:exon7:c.G856T:p.D286Y,ENSCAFG00000016672.4:ENSCAFT00000080551.1:exon7:c.G1111T:p.D371Y,	ENSCAFG00000016672	LCORL	-	chr3	91260124	91260124	G	T	deleterious(0.02)	0/1	56,30	0.333	86
14	nonsynonymous SNV	ENSCAFG00000008007.4:ENSCAFT00000083534.1:exon1:c.G413C:p.R138P,	ENSCAFG00000008007	LIPI	LIPI	chr31	11229769	11229769	C	G	deleterious_low_confidence(0)	0/1	10,10	0.526	20
14	stopgain	ENSCAFG00000010102.4:ENSCAFT00000089608.1:exon15:c.G1790A:p.W597X,ENSCAFG00000010102.4:ENSCAFT00000083677.1:exon14:c.G1727A:p.W576X,ENSCAFG00000010102.4:ENSCAFT00000059628.1:exon15:c.G1790A:p.W597X,ENSCAFG00000010102.4:ENSCAFT00000016056.4:exon13:c.G1691A:p.W564X,	ENSCAFG00000010102	SEMA5A	SEMA5A	chr34	5009920	5009920	G	A	-	0/1	49,23	0.298	72
14	nonsynonymous SNV	ENSCAFG00000014846.4:ENSCAFT00000023563.4:exon3:c.A1004G:p.K335R,ENSCAFG00000014846.4:ENSCAFT00000066585.1:exon2:c.A1064G:p.K355R,	ENSCAFG00000014846	SKIL	SKIL	chr34	34874414	34874414	A	G	deleterious(0.02)	0/1	32,5	0.148	37
14	nonsynonymous SNV	ENSCAFG00000009509.4:ENSCAFT00000090984.1:exon7:c.G1088A:p.R363Q,ENSCAFG00000009509.4:ENSCAFT00000015113.4:exon8:c.G983A:p.R328Q,ENSCAFG00000009509.4:ENSCAFT00000085404.1:exon7:c.G1088A:p.R363Q,ENSCAFG00000009509.4:ENSCAFT00000088468.1:exon8:c.G1001A:p.R334Q,	ENSCAFG00000009509	F13A1	F13A1	chr35	6251313	6251313	C	T	deleterious(0)	0/1	45,20	0.285	65
14	stopgain	ENSCAFG00000010387.4:ENSCAFT00000072025.1:exon10:c.C832T:p.R278X,ENSCAFG00000010387.4:ENSCAFT00000070927.1:exon11:c.C907T:p.R303X,ENSCAFG00000010387.4:ENSCAFT00000016532.4:exon11:c.C907T:p.R303X,ENSCAFG00000010387.4:ENSCAFT00000061724.1:exon11:c.C907T:p.R303X,	ENSCAFG00000010387	FAP	FAP	chr36	7616411	7616411	G	A	-	0/1	64,43	0.4	107
14	synonymous SNV	ENSCAFG00000042181.1:ENSCAFT00000091199.1:exon10:c.A1156C:p.R386R,	ENSCAFG00000042181	CIR1	CIR1	chr36	18414601	18414601	T	G	-	0/1	102,52	0.328	154
14	synonymous SNV	ENSCAFG00000012644.5:ENSCAFT00000063054.1:exon26:c.C4206T:p.S1402S,ENSCAFG00000012644.5:ENSCAFT00000091653.1:exon26:c.C4176T:p.S1392S,ENSCAFG00000012644.5:ENSCAFT00000070886.1:exon27:c.C4296T:p.S1432S,ENSCAFG00000012644.5:ENSCAFT00000020205.4:exon25:c.C3759T:p.S1253S,ENSCAFG00000012644.5:ENSCAFT00000020215.5:exon27:c.C4296T:p.S1432S,ENSCAFG00000012644.5:ENSCAFT00000083113.1:exon27:c.C4296T:p.S143…	ENSCAFG00000012644	NBEAL1	NBEAL1	chr37	11989210	11989210	C	T	-	0/1	65,4	0.064	69
14	synonymous SNV	ENSCAFG00000014224.4:ENSCAFT00000082361.1:exon3:c.C120A:p.P40P,ENSCAFG00000014224.4:ENSCAFT00000022613.4:exon3:c.C102A:p.P34P,	ENSCAFG00000014224	IKZF2	IKZF2	chr37	20658508	20658508	G	T	-	0/1	132,75	0.363	207
14	nonsynonymous SNV	ENSCAFG00000010603.4:ENSCAFT00000081412.1:exon2:c.A158T:p.Y53F,ENSCAFG00000010603.4:ENSCAFT00000016853.4:exon2:c.A158T:p.Y53F,	ENSCAFG00000010603	RGS1	RGS1	chr38	6375771	6375771	T	A	tolerated(0.37)	0/1	43,27	0.4	70
14	nonsynonymous SNV	ENSCAFG00000012932.4:ENSCAFT00000084023.1:exon8:c.C1580T:p.A527V,ENSCAFG00000012932.4:ENSCAFT00000020539.4:exon9:c.C1766T:p.A589V,	ENSCAFG00000012932	RHOBTB1	RHOBTB1	chr4	12977292	12977292	G	A	tolerated(0.48)	0/1	75,4	0.064	79
14	nonsynonymous SNV	ENSCAFG00000013221.4:ENSCAFT00000021033.4:exon7:c.A922T:p.I308F,	ENSCAFG00000013221	CTNNA3	CTNNA3	chr4	18573022	18573022	T	A	deleterious(0)	0/1	51,36	0.397	87
14	frameshift deletion	ENSCAFG00000023029.3:ENSCAFT00000023996.4:exon1:c.681_688del:p.S227fs,	ENSCAFG00000023029	BIRC2	BIRC2	chr5	29311688	29311695	CCCAGTTA	-	-	0/1	112,64	0.394	176
14	nonsynonymous SNV	ENSCAFG00000016714.4:ENSCAFT00000086831.1:exon4:c.A536G:p.H179R,ENSCAFG00000016714.4:ENSCAFT00000026465.4:exon6:c.A605G:p.H202R,ENSCAFG00000016714.4:ENSCAFT00000081814.1:exon6:c.A797G:p.H266R,	ENSCAFG00000016714	TP53	TP53	chr5	32563715	32563715	T	C	deleterious(0.01)	0/1	98,53	0.368	151
14	nonsynonymous SNV	ENSCAFG00000019294.3:ENSCAFT00000090001.1:exon18:c.C1577T:p.A526V,ENSCAFG00000019294.3:ENSCAFT00000030647.3:exon20:c.C1703T:p.A568V,	ENSCAFG00000019294	ACAP3	ACAP3	chr5	56470430	56470430	G	A	tolerated(0.2)	0/1	49,4	0.09	53
14	nonsynonymous SNV	ENSCAFG00000019735.4:ENSCAFT00000066098.1:exon9:c.G1192A:p.E398K,ENSCAFG00000019735.4:ENSCAFT00000076235.1:exon10:c.G1342A:p.E448K,ENSCAFG00000019735.4:ENSCAFT00000031382.4:exon10:c.G1342A:p.E448K,ENSCAFG00000019735.4:ENSCAFT00000086434.1:exon10:c.G1342A:p.E448K,	ENSCAFG00000019735	PIK3CD	PIK3CD	chr5	62930173	62930173	G	A	tolerated(0.1)	0/1	85,47	0.352	132
14	synonymous SNV	ENSCAFG00000014535.5:ENSCAFT00000044587.3:exon3:c.T615C:p.P205P,ENSCAFG00000014535.5:ENSCAFT00000023088.4:exon3:c.T615C:p.P205P,	ENSCAFG00000014535	GPC2	GPC2	chr6	9356330	9356330	T	C	-	0/1	226,5	0.026	231
14	nonsynonymous SNV	ENSCAFG00000016345.4:ENSCAFT00000025934.4:exon2:c.G443A:p.R148H,	ENSCAFG00000016345	AMZ1	AMZ1	chr6	14493192	14493192	C	T	deleterious_low_confidence(0.01)	0/1	69,4	0.065	73
14	stopgain	ENSCAFG00000030772.2:ENSCAFT00000049192.2:exon9:c.G3376T:p.E1126X,	ENSCAFG00000030772	PALB2	PALB2	chr6	22226280	22226280	G	T	-	0/1	73,37	0.338	110
14	nonsynonymous SNV	ENSCAFG00000017741.5:ENSCAFT00000028143.5:exon19:c.C1726T:p.R576W,	ENSCAFG00000017741	VWA3A	VWA3A	chr6	23496357	23496357	G	A	deleterious(0.01)	0/1	89,32	0.274	121
14	nonsynonymous SNV	ENSCAFG00000029474.2:ENSCAFT00000046905.2:exon2:c.A329G:p.D110G,ENSCAFG00000029474.2:ENSCAFT00000063186.1:exon3:c.A431G:p.D144G,ENSCAFG00000029474.2:ENSCAFT00000068600.1:exon1:c.A296G:p.D99G,	ENSCAFG00000029474	GADD45A	GADD45A	chr6	77395270	77395270	T	C	deleterious(0)	0/1	27,12	0.31	39
14	synonymous SNV	ENSCAFG00000041170.1:ENSCAFT00000079154.1:exon1:c.T6G:p.P2P,	ENSCAFG00000041170	-	JTB	chr7	43159494	43159494	T	G	-	0/1	40,21	0.357	61
14	nonsynonymous SNV	ENSCAFG00000015819.4:ENSCAFT00000084224.1:exon78:c.T14798G:p.L4933R,ENSCAFG00000015819.4:ENSCAFT00000089121.1:exon78:c.T14753G:p.L4918R,ENSCAFG00000015819.4:ENSCAFT00000078088.1:exon79:c.T14885G:p.L4962R,ENSCAFG00000015819.4:ENSCAFT00000088554.1:exon78:c.T14783G:p.L4928R,ENSCAFG00000015819.4:ENSCAFT00000066626.1:exon79:c.T14885G:p.L4962R,ENSCAFG00000015819.4:ENSCAFT00000093800.1:exon78:c.T14165G:…	ENSCAFG00000015819	SYNE2	SYNE2	chr8	38572179	38572179	T	G	deleterious(0)	0/1	17,12	0.412	29
14	frameshift insertion	ENSCAFG00000018075.4:ENSCAFT00000028719.4:exon11:c.1249_1250insTGCT:p.V417fs,ENSCAFG00000018075.4:ENSCAFT00000085506.1:exon8:c.1000_1001insTGCT:p.V334fs,ENSCAFG00000018075.4:ENSCAFT00000086511.1:exon10:c.1174_1175insTGCT:p.V392fs,	ENSCAFG00000018075	TRAF3	TRAF3	chr8	70789187	70789187	-	TGCT	-	0/1	76,47	0.353	123
14	nonsynonymous SNV	ENSCAFG00000046771.1:ENSCAFT00000077325.1:exon2:c.G535A:p.E179K,	ENSCAFG00000046771	-	IGHV4-4	chr8	73028228	73028228	C	T	tolerated_low_confidence(0.7)	0|1	48,43	0.523	91
14	nonsynonymous SNV	ENSCAFG00000046771.1:ENSCAFT00000077325.1:exon2:c.A532G:p.R178G,	ENSCAFG00000046771	-	IGHV4-4	chr8	73028231	73028231	T	C	deleterious_low_confidence(0.04)	0|1	48,43	0.523	91
14	nonsynonymous SNV	ENSCAFG00000005545.4:ENSCAFT00000008931.4:exon3:c.G388A:p.V130M,	ENSCAFG00000005545	ENGASE	ENGASE	chr9	2383797	2383797	C	T	tolerated(0.15)	0/1	38,25	0.366	63
14	nonsynonymous SNV	ENSCAFG00000011552.5:ENSCAFT00000061101.1:exon1:c.A274G:p.N92D,ENSCAFG00000011552.5:ENSCAFT00000079507.1:exon1:c.A274G:p.N92D,ENSCAFG00000011552.5:ENSCAFT00000078285.1:exon1:c.A25G:p.N9D,ENSCAFG00000011552.5:ENSCAFT00000018361.4:exon1:c.A274G:p.N92D,ENSCAFG00000011552.5:ENSCAFT00000080296.1:exon1:c.A274G:p.N92D,ENSCAFG00000011552.5:ENSCAFT00000062045.1:exon1:c.A25G:p.N9D,ENSCAFG00000011552.5:ENSC…	ENSCAFG00000011552	BPTF	BPTF	chr9	12703149	12703149	T	C	deleterious(0.05)	0/1	86,51	0.402	137
14	stopgain	ENSCAFG00000011552.5:ENSCAFT00000061101.1:exon1:c.T248G:p.L83X,ENSCAFG00000011552.5:ENSCAFT00000079507.1:exon1:c.T248G:p.L83X,ENSCAFG00000011552.5:ENSCAFT00000018361.4:exon1:c.T248G:p.L83X,ENSCAFG00000011552.5:ENSCAFT00000080296.1:exon1:c.T248G:p.L83X,ENSCAFG00000011552.5:ENSCAFT00000083805.1:exon1:c.T248G:p.L83X,ENSCAFG00000011552.5:ENSCAFT00000047847.3:exon1:c.T248G:p.L83X,	ENSCAFG00000011552	BPTF	BPTF	chr9	12703175	12703175	A	C	-	0/1	93,51	0.369	144
14	nonsynonymous SNV	ENSCAFG00000017703.4:ENSCAFT00000093729.1:exon26:c.C5996T:p.P1999L,ENSCAFG00000017703.4:ENSCAFT00000028083.4:exon26:c.C5996T:p.P1999L,	ENSCAFG00000017703	MED13	MED13	chr9	34733014	34733014	C	T	tolerated(0.14)	0/1	43,36	0.412	79
14	nonsynonymous SNV	ENSCAFG00000018780.4:ENSCAFT00000072157.1:exon1:c.C214G:p.P72A,	ENSCAFG00000018780	RAB34	RAB34	chr9	42912955	42912955	G	C	tolerated_low_confidence(0.26)	0|1	54,4	0.079	58
14	synonymous SNV	ENSCAFG00000017327.5:ENSCAFT00000047901.2:exon40:c.C4593T:p.S1531S,ENSCAFG00000017327.5:ENSCAFT00000073432.1:exon37:c.C4602T:p.S1534S,ENSCAFG00000017327.5:ENSCAFT00000092015.1:exon38:c.C4674T:p.S1558S,ENSCAFG00000017327.5:ENSCAFT00000027493.5:exon39:c.C4443T:p.S1481S,ENSCAFG00000017327.5:ENSCAFT00000071836.1:exon37:c.C4566T:p.S1522S,	ENSCAFG00000017327	BRWD3	BRWD3	chrX	62023209	62023209	G	A	-	0/1	140,49	0.273	189
14	nonsynonymous SNV	ENSCAFG00000017373.4:ENSCAFT00000069263.1:exon15:c.A1329C:p.L443F,ENSCAFG00000017373.4:ENSCAFT00000027526.4:exon16:c.A1446C:p.L482F,ENSCAFG00000017373.4:ENSCAFT00000084840.1:exon17:c.A1353C:p.L451F,ENSCAFG00000017373.4:ENSCAFT00000071030.1:exon16:c.A1446C:p.L482F,ENSCAFG00000017373.4:ENSCAFT00000061167.1:exon16:c.A1446C:p.L482F,ENSCAFG00000017373.4:ENSCAFT00000072012.1:exon16:c.A1446C:p.L482F,	ENSCAFG00000017373	RPS6KA6	RPS6KA6	chrX	64962244	64962244	T	G	deleterious(0.01)	0/1	11,14	0.526	25
14	nonsynonymous SNV	ENSCAFG00000017479.5:ENSCAFT00000035655.3:exon12:c.A1238C:p.Y413S,ENSCAFG00000017479.5:ENSCAFT00000093057.1:exon13:c.A1259C:p.Y420S,ENSCAFG00000017479.5:ENSCAFT00000027703.5:exon12:c.A1226C:p.Y409S,ENSCAFG00000017479.5:ENSCAFT00000090879.1:exon13:c.A1259C:p.Y420S,	ENSCAFG00000017479	DIAPH2	DIAPH2	chrX	70316386	70316386	A	C	tolerated(0.42)	0/1	19,10	0.368	29
15	nonsynonymous SNV	ENSCAFG00000000062.4:ENSCAFT00000000107.4:exon4:c.C419T:p.A140V,	ENSCAFG00000000062	-	SERPINB3	chr1	13468550	13468550	C	T	deleterious(0)	0/1	20,4	0.176	24
15	nonsynonymous SNV	ENSCAFG00000000445.5:ENSCAFT00000000760.5:exon77:c.A14951G:p.Q4984R,ENSCAFG00000000445.5:ENSCAFT00000043078.3:exon77:c.A14738G:p.Q4913R,	ENSCAFG00000000445	SYNE1	SYNE1	chr1	42569704	42569704	T	C	-	0/1	18,4	0.188	22
15	nonsynonymous SNV	ENSCAFG00000001106.5:ENSCAFT00000036090.3:exon35:c.G5026T:p.A1676S,	ENSCAFG00000001106	LAMA2	LAMA2	chr1	67967805	67967805	G	T	tolerated(0.41)	0/1	11,6	0.4	17
15	synonymous SNV	ENSCAFG00000001577.5:ENSCAFT00000075361.1:exon1:c.G183A:p.A61A,ENSCAFG00000001577.5:ENSCAFT00000002473.5:exon1:c.G183A:p.A61A,ENSCAFG00000001577.5:ENSCAFT00000049475.3:exon1:c.G183A:p.A61A,ENSCAFG00000001577.5:ENSCAFT00000043184.2:exon1:c.G183A:p.A61A,ENSCAFG00000001577.5:ENSCAFT00000060215.1:exon1:c.G183A:p.A61A,	ENSCAFG00000001577	CEP78	CEP78	chr1	80469168	80469168	C	T	-	0/1	13,3	0.231	16
15	nonsynonymous SNV	ENSCAFG00000001902.5:ENSCAFT00000060570.1:exon2:c.C679T:p.P227S,ENSCAFG00000001902.5:ENSCAFT00000048763.3:exon6:c.C1078T:p.P360S,ENSCAFG00000001902.5:ENSCAFT00000046860.3:exon6:c.C1078T:p.P360S,ENSCAFG00000001902.5:ENSCAFT00000059505.1:exon5:c.C913T:p.P305S,ENSCAFG00000001902.5:ENSCAFT00000073357.1:exon6:c.C832T:p.P278S,ENSCAFG00000001902.5:ENSCAFT00000003012.4:exon5:c.C901T:p.P301S,	ENSCAFG00000001902	TJP2	AL358113.1	chr1	88156844	88156844	G	A	tolerated(0.59)	0/1	66,4	0.063	70
15	nonsynonymous SNV	ENSCAFG00000032330.2:ENSCAFT00000047492.2:exon1:c.C332T:p.T111M,	ENSCAFG00000032330	ZNF628	ZNF628	chr1	102228450	102228450	G	A	deleterious(0)	0/1	57,4	0.068	61
15	nonsynonymous SNV	ENSCAFG00000032029.2:ENSCAFT00000086251.1:exon3:c.G845C:p.S282T,ENSCAFG00000032029.2:ENSCAFT00000062211.1:exon4:c.G857C:p.S286T,ENSCAFG00000032029.2:ENSCAFT00000044977.2:exon5:c.G857C:p.S286T,	ENSCAFG00000032029	ZNF677	ZNF677	chr1	104803119	104803119	G	C	tolerated(0.23)	0|1	23,3	0.199	26
15	nonsynonymous SNV	ENSCAFG00000004170.5:ENSCAFT00000006692.4:exon9:c.A2198G:p.E733G,ENSCAFG00000004170.5:ENSCAFT00000006694.5:exon9:c.A2198G:p.E733G,	ENSCAFG00000004170	DHX34	DHX34	chr1	108617821	108617821	T	C	tolerated(0.06)	0/1	22,4	0.136	26
15	synonymous SNV	ENSCAFG00000002712.4:ENSCAFT00000082403.1:exon21:c.A4278G:p.R1426R,ENSCAFG00000002712.4:ENSCAFT00000048777.2:exon7:c.A1257G:p.R419R,ENSCAFG00000002712.4:ENSCAFT00000072673.1:exon22:c.A4368G:p.R1456R,ENSCAFG00000002712.4:ENSCAFT00000090789.1:exon21:c.A4344G:p.R1448R,ENSCAFG00000002712.4:ENSCAFT00000073105.1:exon20:c.A4332G:p.R1444R,ENSCAFG00000002712.4:ENSCAFT00000089244.1:exon3:c.A276G:p.R92R,	ENSCAFG00000002712	NRXN1	NRXN1	chr10	51558987	51558987	T	C	-	0/1	38,24	0.359	62
15	stopgain	ENSCAFG00000001754.4:ENSCAFT00000087472.1:exon15:c.T1782G:p.Y594X,ENSCAFG00000001754.4:ENSCAFT00000002746.4:exon20:c.T2319G:p.Y773X,ENSCAFG00000001754.4:ENSCAFT00000062245.1:exon21:c.T2235G:p.Y745X,ENSCAFG00000001754.4:ENSCAFT00000080986.1:exon15:c.T1485G:p.Y495X,ENSCAFG00000001754.4:ENSCAFT00000082826.1:exon17:c.T2154G:p.Y718X,ENSCAFG00000001754.4:ENSCAFT00000086242.1:exon16:c.T1938G:p.Y646X,	ENSCAFG00000001754	POT1	POT1	chr14	11066374	11066374	T	G	-	0/1	18,10	0.381	28
15	nonsynonymous SNV	ENSCAFG00000006057.5:ENSCAFT00000009828.5:exon19:c.C3572T:p.A1191V,ENSCAFG00000006057.5:ENSCAFT00000048373.2:exon18:c.C3425T:p.A1142V,	ENSCAFG00000006057	NSD3	NSD3	chr16	27215402	27215402	C	T	deleterious(0.01)	0/1	23,4	0.187	27
15	stopgain	ENSCAFG00000007653.4:ENSCAFT00000068181.1:exon1:c.C49T:p.R17X,ENSCAFG00000007653.4:ENSCAFT00000063596.1:exon1:c.C49T:p.R17X,	ENSCAFG00000007653	ST3GAL5	ST3GAL5	chr17	39154516	39154516	C	T	-	0/1	24,4	0.158	28
15	nonsynonymous SNV	ENSCAFG00000013122.5:ENSCAFT00000046642.3:exon14:c.C2561T:p.A854V,ENSCAFG00000013122.5:ENSCAFT00000075850.1:exon16:c.C2714T:p.A905V,ENSCAFG00000013122.5:ENSCAFT00000089615.1:exon15:c.C2525T:p.A842V,ENSCAFG00000013122.5:ENSCAFT00000020871.4:exon16:c.C2714T:p.A905V,	ENSCAFG00000013122	MAGI3	MAGI3	chr17	62083486	62083486	G	A	deleterious(0)	0/1	15,7	0.333	22
15	nonsynonymous SNV	ENSCAFG00000007308.5:ENSCAFT00000011699.4:exon1:c.C41T:p.S14L,	ENSCAFG00000007308	DEPDC7	DEPDC7	chr18	34630409	34630409	G	A	tolerated(0.15)	0/1	12,4	0.25	16
15	nonsynonymous SNV	ENSCAFG00000031173.1:ENSCAFT00000042977.1:exon1:c.A16G:p.N6D,	ENSCAFG00000031173	OR4P6	-	chr18	40198789	40198789	A	G	deleterious(0)	0/1	22,19	0.516	41
15	nonsynonymous SNV	ENSCAFG00000006086.5:ENSCAFT00000076638.1:exon1:c.A1406G:p.N469S,ENSCAFG00000006086.5:ENSCAFT00000088701.1:exon1:c.A1406G:p.N469S,	ENSCAFG00000006086	PCDHGC3	PCDHGC3	chr2	36452686	36452686	A	G	deleterious(0)	0/1	95,42	0.303	137
15	synonymous SNV	ENSCAFG00000006229.4:ENSCAFT00000085835.1:exon1:c.C148T:p.L50L,ENSCAFG00000006229.4:ENSCAFT00000071847.1:exon1:c.C148T:p.L50L,	ENSCAFG00000006229	PCDH1	PCDH1	chr2	36828213	36828213	G	A	-	0/1	78,4	0.055	82
15	nonsynonymous SNV	ENSCAFG00000012314.6:ENSCAFT00000084179.1:exon19:c.T6182G:p.L2061R,ENSCAFG00000012314.6:ENSCAFT00000080683.1:exon19:c.T6185G:p.L2062R,ENSCAFG00000012314.6:ENSCAFT00000068973.1:exon18:c.T5729G:p.L1910R,ENSCAFG00000012314.6:ENSCAFT00000044234.3:exon20:c.T6395G:p.L2132R,ENSCAFG00000012314.6:ENSCAFT00000019631.5:exon20:c.T6398G:p.L2133R,	ENSCAFG00000012314	ARID1A	ARID1A	chr2	73333416	73333416	A	C	deleterious(0)	0/1	35,18	0.342	53
15	nonsynonymous SNV	ENSCAFG00000016122.4:ENSCAFT00000025572.4:exon8:c.T1276C:p.S426P,ENSCAFG00000016122.4:ENSCAFT00000087323.1:exon9:c.T1267C:p.S423P,	ENSCAFG00000016122	ZBTB17	ZBTB17	chr2	81679626	81679626	T	C	deleterious(0.01)	0/1	12,4	0.231	16
15	synonymous SNV	ENSCAFG00000030878.2:ENSCAFT00000045665.2:exon2:c.C222T:p.V74V,	ENSCAFG00000030878	ZNF35	ZNF35	chr20	33598	33598	G	A	-	0/1	93,4	0.059	97
15	nonsynonymous SNV	ENSCAFG00000006441.4:ENSCAFT00000010397.4:exon1:c.G100T:p.A34S,	ENSCAFG00000006441	RYBP	RYBP	chr20	19654041	19654041	G	T	tolerated(0.7)	0/1	29,4	0.217	33
15	nonsynonymous SNV	ENSCAFG00000007873.5:ENSCAFT00000047961.3:exon22:c.T3401C:p.V1134A,	ENSCAFG00000007873	DNAH12	DNAH12	chr20	32959823	32959823	T	C	tolerated(0.13)	0/1	16,6	0.286	22
15	nonsynonymous SNV	ENSCAFG00000010281.4:ENSCAFT00000016320.4:exon11:c.G1112A:p.G371D,	ENSCAFG00000010281	MAPKAPK3	MAPKAPK3	chr20	38732765	38732765	C	T	tolerated(0.48)	0/1	29,5	0.18	34
15	nonsynonymous SNV	ENSCAFG00000013851.5:ENSCAFT00000022002.4:exon7:c.G580A:p.A194T,	ENSCAFG00000013851	FYCO1	FYCO1	chr20	42544175	42544175	G	A	deleterious(0)	0/1	21,4	0.187	25
15	nonsynonymous SNV	ENSCAFG00000017226.3:ENSCAFT00000027293.3:exon23:c.C2402T:p.T801M,	ENSCAFG00000017226	TNPO2	TNPO2	chr20	49421777	49421777	C	T	-	0/1	40,4	0.133	44
15	synonymous SNV	ENSCAFG00000005619.6:ENSCAFT00000009046.4:exon2:c.G933A:p.K311K,	ENSCAFG00000005619	ARHGEF17	ARHGEF17	chr21	24918733	24918733	C	T	-	0/1	47,4	0.083	51
15	nonsynonymous SNV	ENSCAFG00000031799.1:ENSCAFT00000019838.3:exon1:c.G920A:p.R307H,	ENSCAFG00000031799	-	OR52J3	chr21	27508272	27508272	G	A	tolerated(0.32)	0/1	67,21	0.246	88
15	nonsynonymous SNV	ENSCAFG00000030220.2:ENSCAFT00000044335.2:exon4:c.A313G:p.S105G,	ENSCAFG00000030220	-	-	chr21	39408396	39408396	A	G	deleterious(0.04)	0/1	74,10	0.124	84
15	nonsynonymous SNV	ENSCAFG00000006720.5:ENSCAFT00000010812.4:exon1:c.C277G:p.R93G,	ENSCAFG00000006720	AMOTL2	AMOTL2	chr23	31162032	31162032	G	C	tolerated(0.06)	0/1	46,3	0.091	49
15	nonsynonymous SNV	ENSCAFG00000007089.6:ENSCAFT00000011364.5:exon4:c.T694C:p.F232L,ENSCAFG00000007089.6:ENSCAFT00000068983.1:exon3:c.T802C:p.F268L,ENSCAFG00000007089.6:ENSCAFT00000044483.3:exon3:c.T802C:p.F268L,	ENSCAFG00000007089	MYLK2	MYLK2	chr24	21286769	21286769	T	C	tolerated(0.11)	0/1	21,23	0.552	44
15	nonsynonymous SNV	ENSCAFG00000010948.5:ENSCAFT00000047790.2:exon40:c.C4723T:p.R1575C,	ENSCAFG00000010948	PREX1	PREX1	chr24	35404764	35404764	G	A	tolerated(0.08)	0/1	25,3	0.157	28
15	nonsynonymous SNV	ENSCAFG00000012236.4:ENSCAFT00000019444.4:exon8:c.G923A:p.R308H,	ENSCAFG00000012236	MLPH	MLPH	chr25	48154118	48154118	G	A	tolerated(0.1)	0/1	26,4	0.136	30
15	nonsynonymous SNV	ENSCAFG00000012357.5:ENSCAFT00000019614.5:exon3:c.A155G:p.D52G,ENSCAFG00000012357.5:ENSCAFT00000046075.2:exon3:c.A152G:p.D51G,	ENSCAFG00000012357	RBM44	RBM44	chr25	48393969	48393969	A	G	tolerated(0.27)	0/1	20,4	0.167	24
15	nonsynonymous SNV	ENSCAFG00000008907.5:ENSCAFT00000046714.2:exon2:c.G973T:p.A325S,ENSCAFG00000008907.5:ENSCAFT00000044433.3:exon4:c.G1348T:p.A450S,ENSCAFG00000008907.5:ENSCAFT00000014138.5:exon2:c.G973T:p.A325S,	ENSCAFG00000008907	ADCY6	ADCY6	chr27	5744020	5744020	G	T	deleterious(0.03)	0/1	22,4	0.15	26
15	nonsynonymous SNV	ENSCAFG00000025434.3:ENSCAFT00000039521.3:exon3:c.A631T:p.R211W,	ENSCAFG00000025434	MANSC4	MANSC4	chr27	19975916	19975916	A	T	deleterious(0.03)	0|1	73,4	0.053	77
15	nonsynonymous SNV	ENSCAFG00000011253.5:ENSCAFT00000017892.5:exon13:c.A1604G:p.E535G,	ENSCAFG00000011253	INTS13	INTS13	chr27	20725539	20725539	A	G	deleterious(0.02)	0/1	20,3	0.187	23
15	nonsynonymous SNV	ENSCAFG00000013224.4:ENSCAFT00000078174.1:exon3:c.G217A:p.G73R,ENSCAFG00000013224.4:ENSCAFT00000020996.4:exon3:c.G295A:p.G99R,	ENSCAFG00000013224	DDX47	DDX47	chr27	33517540	33517540	C	T	deleterious(0)	0/1	22,3	0.157	25
15	nonsynonymous SNV	ENSCAFG00000015788.5:ENSCAFT00000071922.1:exon14:c.G2063A:p.R688K,ENSCAFG00000015788.5:ENSCAFT00000025016.5:exon14:c.G2063A:p.R688K,ENSCAFG00000015788.5:ENSCAFT00000071712.1:exon14:c.G2063A:p.R688K,ENSCAFG00000015788.5:ENSCAFT00000090919.1:exon12:c.G1865A:p.R622K,	ENSCAFG00000015788	B4GALNT3	B4GALNT3	chr27	42594779	42594779	G	A	tolerated(0.51)	0|1	19,3	0.156	22
15	nonsynonymous SNV	ENSCAFG00000008218.4:ENSCAFT00000013109.4:exon10:c.A2035G:p.T679A,	ENSCAFG00000008218	ADGRV1	ADGRV1	chr3	18329735	18329735	T	C	tolerated(0.14)	0/1	71,4	0.068	75
15	nonsynonymous SNV	ENSCAFG00000014211.5:ENSCAFT00000022679.5:exon1:c.G46A:p.G16S,ENSCAFG00000014211.5:ENSCAFT00000088668.1:exon1:c.G46A:p.G16S,ENSCAFG00000014211.5:ENSCAFT00000070574.1:exon1:c.G46A:p.G16S,ENSCAFG00000014211.5:ENSCAFT00000047628.2:exon1:c.G46A:p.G16S,	ENSCAFG00000014211	SLC12A1	SLC12A1	chr30	14459862	14459862	G	A	tolerated_low_confidence(1)	0/1	40,6	0.125	46
15	nonsynonymous SNV	ENSCAFG00000011926.4:ENSCAFT00000018946.4:exon2:c.C192G:p.N64K,ENSCAFG00000011926.4:ENSCAFT00000070095.1:exon2:c.C192G:p.N64K,ENSCAFG00000011926.4:ENSCAFT00000076717.1:exon2:c.C192G:p.N64K,	ENSCAFG00000011926	FTCD	FTCD	chr31	39463308	39463308	G	C	tolerated(0.31)	0/1	20,2	0.118	22
15	stopgain	ENSCAFG00000010953.4:ENSCAFT00000017444.4:exon2:c.C1408T:p.R470X,	ENSCAFG00000010953	PLCL1	PLCL1	chr37	7491788	7491788	C	T	-	0/1	62,34	0.333	96
15	nonsynonymous SNV	ENSCAFG00000012860.7:ENSCAFT00000072766.1:exon1:c.A55G:p.K19E,ENSCAFG00000012860.7:ENSCAFT00000061535.1:exon1:c.A55G:p.K19E,ENSCAFG00000012860.7:ENSCAFT00000020408.6:exon1:c.A55G:p.K19E,ENSCAFG00000012860.7:ENSCAFT00000068940.1:exon1:c.A55G:p.K19E,ENSCAFG00000012860.7:ENSCAFT00000066851.1:exon1:c.A55G:p.K19E,ENSCAFG00000012860.7:ENSCAFT00000048598.3:exon1:c.A55G:p.K19E,	ENSCAFG00000012860	-	RAPH1	chr37	12346473	12346473	T	C	deleterious_low_confidence(0.02)	0/1	76,4	0.056	80
15	nonsynonymous SNV	ENSCAFG00000031664.2:ENSCAFT00000087422.1:exon17:c.A1949G:p.Q650R,ENSCAFG00000031664.2:ENSCAFT00000048673.2:exon16:c.A1799G:p.Q600R,ENSCAFG00000031664.2:ENSCAFT00000066467.1:exon17:c.A1949G:p.Q650R,	ENSCAFG00000031664	KCNT2	KCNT2	chr38	3278330	3278330	A	G	deleterious(0.03)	0/1	19,3	0.174	22
15	synonymous SNV	ENSCAFG00000014847.4:ENSCAFT00000023558.4:exon1:c.G207A:p.Q69Q,	ENSCAFG00000014847	SYNPO2L	SYNPO2L	chr4	24177607	24177607	C	T	-	0/1	94,4	0.045	98
15	nonsynonymous SNV	ENSCAFG00000015917.5:ENSCAFT00000025221.4:exon3:c.G1355A:p.R452Q,	ENSCAFG00000015917	LRIT2	LRIT2	chr4	32465132	32465132	C	T	tolerated(0.15)	0/1	3,5	0.627	8
15	synonymous SNV	ENSCAFG00000024037.3:ENSCAFT00000063080.1:exon3:c.T232C:p.L78L,ENSCAFG00000024037.3:ENSCAFT00000028392.4:exon3:c.T463C:p.L155L,ENSCAFG00000024037.3:ENSCAFT00000073097.1:exon3:c.T232C:p.L78L,	ENSCAFG00000024037	SLC36A1	SLC36A1	chr4	57861885	57861885	A	G	-	0/1	29,6	0.174	35
15	stopgain	ENSCAFG00000017460.5:ENSCAFT00000027662.4:exon17:c.C2127A:p.C709X,	ENSCAFG00000017460	MYH13	MYH13	chr5	34645907	34645907	G	T	-	0/1	41,4	0.103	45
15	synonymous SNV	ENSCAFG00000017769.4:ENSCAFT00000028231.4:exon10:c.G1809A:p.T603T,ENSCAFG00000017769.4:ENSCAFT00000074330.1:exon10:c.G1809A:p.T603T,	ENSCAFG00000017769	DNAH9	DNAH9	chr5	35765615	35765615	G	A	-	0/1	30,8	0.24	38
15	synonymous SNV	ENSCAFG00000020320.4:ENSCAFT00000032365.4:exon2:c.T225C:p.V75V,	ENSCAFG00000020320	ESRP2	ESRP2	chr5	81287735	81287735	T	C	-	0/1	5,2	0.286	7
15	synonymous SNV	ENSCAFG00000020375.5:ENSCAFT00000044632.3:exon7:c.G1017A:p.T339T,	ENSCAFG00000020375	E2F4	E2F4	chr5	82172206	82172206	C	T	-	0/1	35,16	0.343	51
15	synonymous SNV	ENSCAFG00000020377.6:ENSCAFT00000032455.5:exon5:c.G957C:p.L319L,	ENSCAFG00000020377	EXOC3L1	EXOC3L1	chr5	82178979	82178979	G	C	-	0/1	81,4	0.054	85
15	nonsynonymous SNV	ENSCAFG00000020436.4:ENSCAFT00000070317.1:exon1:c.C95T:p.T32M,ENSCAFG00000020436.4:ENSCAFT00000032542.4:exon1:c.C95T:p.T32M,	ENSCAFG00000020436	CDH8	CDH8	chr5	86402864	86402864	C	T	tolerated(0.23)	0/1	19,16	0.44	35
15	nonsynonymous SNV	ENSCAFG00000030242.2:ENSCAFT00000049780.2:exon1:c.C158A:p.P53H,	ENSCAFG00000030242	HS3ST2	HS3ST2	chr6	22905400	22905400	G	T	tolerated_low_confidence(0.12)	0|1	3,2	0.4	5
15	synonymous SNV	ENSCAFG00000030242.2:ENSCAFT00000049780.2:exon1:c.G156A:p.A52A,	ENSCAFG00000030242	HS3ST2	HS3ST2	chr6	22905402	22905402	C	T	-	0|1	3,2	0.4	5
15	synonymous SNV	ENSCAFG00000019418.4:ENSCAFT00000030876.4:exon14:c.G1275A:p.T425T,ENSCAFG00000019418.4:ENSCAFT00000061675.1:exon13:c.G1413A:p.T471T,ENSCAFG00000019418.4:ENSCAFT00000066928.1:exon12:c.G1368A:p.T456T,	ENSCAFG00000019418	TRAF7	TBL3	chr6	38791019	38791019	C	T	-	0/1	27,3	0.13	30
15	nonsynonymous SNV	ENSCAFG00000020353.6:ENSCAFT00000049295.2:exon4:c.T523C:p.C175R,	ENSCAFG00000020353	NEXN	NEXN	chr6	68990755	68990755	A	G	deleterious_low_confidence(0)	0/1	27,6	0.182	33
15	nonsynonymous SNV	ENSCAFG00000011630.5:ENSCAFT00000091624.1:exon5:c.G556T:p.D186Y,ENSCAFG00000011630.5:ENSCAFT00000081251.1:exon3:c.G571T:p.D191Y,ENSCAFG00000011630.5:ENSCAFT00000062431.1:exon5:c.G685T:p.D229Y,	ENSCAFG00000011630	-	CR1	chr7	6513923	6513923	G	T	deleterious(0)	0/1	22,3	0.149	25
15	nonsynonymous SNV	ENSCAFG00000011427.5:ENSCAFT00000065417.1:exon8:c.G923A:p.R308Q,ENSCAFG00000011427.5:ENSCAFT00000072235.1:exon14:c.G2975A:p.R992Q,ENSCAFG00000011427.5:ENSCAFT00000069866.1:exon9:c.G827A:p.R276Q,ENSCAFG00000011427.5:ENSCAFT00000068423.1:exon14:c.G2879A:p.R960Q,ENSCAFG00000011427.5:ENSCAFT00000018142.5:exon15:c.G3095A:p.R1032Q,	ENSCAFG00000011427	ACIN1	ACIN1	chr8	3373301	3373301	C	T	deleterious(0)	0/1	55,6	0.096	61
15	nonsynonymous SNV	ENSCAFG00000015592.4:ENSCAFT00000065321.1:exon3:c.C1360T:p.R454W,ENSCAFG00000015592.4:ENSCAFT00000024714.4:exon3:c.C1360T:p.R454W,	ENSCAFG00000015592	PCNX4	PCNX4	chr8	35225677	35225677	C	T	tolerated(0.08)	0/1	21,16	0.458	37
15	nonsynonymous SNV	ENSCAFG00000004554.4:ENSCAFT00000007326.4:exon4:c.C349T:p.R117W,	ENSCAFG00000004554	GPR142	GPR142	chr9	6041265	6041265	G	A	deleterious(0.02)	0/1	25,4	0.149	29
15	nonsynonymous SNV	ENSCAFG00000012998.4:ENSCAFT00000020636.4:exon11:c.A1537G:p.T513A,	ENSCAFG00000012998	ACE	ACE	chr9	11503260	11503260	A	G	tolerated(0.36)	0/1	10,29	0.68	39
15	nonsynonymous SNV	ENSCAFG00000013774.4:ENSCAFT00000075933.1:exon1:c.T8C:p.V3A,ENSCAFG00000013774.4:ENSCAFT00000021854.4:exon1:c.T8C:p.V3A,ENSCAFG00000013774.4:ENSCAFT00000088008.1:exon1:c.T8C:p.V3A,	ENSCAFG00000013774	MAP3K14	MAP3K14	chr9	18280225	18280225	T	C	deleterious_low_confidence(0)	0/1	27,10	0.266	37
15	nonsynonymous SNV	ENSCAFG00000013774.4:ENSCAFT00000075933.1:exon1:c.G199A:p.A67T,ENSCAFG00000013774.4:ENSCAFT00000021854.4:exon1:c.G199A:p.A67T,ENSCAFG00000013774.4:ENSCAFT00000088008.1:exon1:c.G199A:p.A67T,	ENSCAFG00000013774	MAP3K14	MAP3K14	chr9	18280416	18280416	G	A	deleterious(0)	0/1	38,18	0.324	56
15	stopgain	ENSCAFG00000018176.4:ENSCAFT00000065323.1:exon1:c.C100T:p.Q34X,ENSCAFG00000018176.4:ENSCAFT00000070071.1:exon4:c.C112T:p.Q38X,ENSCAFG00000018176.4:ENSCAFT00000028877.4:exon3:c.C76T:p.Q26X,ENSCAFG00000018176.4:ENSCAFT00000062370.1:exon1:c.C100T:p.Q34X,	ENSCAFG00000018176	TAF15	TAF15	chr9	37864178	37864178	G	A	-	0/1	29,32	0.5	61
15	nonsynonymous SNV	ENSCAFG00000019556.4:ENSCAFT00000031097.4:exon3:c.C202T:p.R68W,	ENSCAFG00000019556	RABL6	RABL6	chr9	48769580	48769580	G	A	deleterious_low_confidence(0.03)	0/1	61,7	0.116	68
15	nonsynonymous SNV	ENSCAFG00000019085.4:ENSCAFT00000030313.4:exon7:c.C577T:p.R193C,ENSCAFG00000019085.4:ENSCAFT00000088922.1:exon5:c.C331T:p.R111C,ENSCAFG00000019085.4:ENSCAFT00000060066.1:exon7:c.C577T:p.R193C,ENSCAFG00000019085.4:ENSCAFT00000078680.1:exon7:c.C577T:p.R193C,ENSCAFG00000019085.4:ENSCAFT00000073645.1:exon7:c.C577T:p.R193C,ENSCAFG00000019085.4:ENSCAFT00000090233.1:exon5:c.C331T:p.R111C,	ENSCAFG00000019085	FMR1	FMR1	chrX	116266770	116266770	C	T	deleterious(0.02)	0/1	12,4	0.273	16
15	frameshift deletion	ENSCAFG00000019239.4:ENSCAFT00000030537.4:exon2:c.209_210del:p.S70fs,ENSCAFG00000019239.4:ENSCAFT00000087713.1:exon3:c.305_306del:p.S102fs,	ENSCAFG00000019239	CCNQ	CCNQ	chrX	121417271	121417272	AG	-	-	0|1	9,16	0.633	25
15	nonsynonymous SNV	ENSCAFG00000019239.4:ENSCAFT00000030537.4:exon2:c.T208A:p.S70T,ENSCAFG00000019239.4:ENSCAFT00000087713.1:exon3:c.T304A:p.S102T,	ENSCAFG00000019239	CCNQ	CCNQ	chrX	121417273	121417273	A	T	tolerated(0.39)	0|1	9,16	0.632	25
15	nonsynonymous SNV	ENSCAFG00000019586.4:ENSCAFT00000031134.4:exon6:c.G565C:p.A189P,	ENSCAFG00000019586	FAM5-A	-	chrX	122152993	122152993	G	C	tolerated(0.18)	0/1	10,6	0.357	16
16	nonsynonymous SNV	ENSCAFG00000023693.4:ENSCAFT00000000535.4:exon21:c.C2518T:p.R840C,ENSCAFG00000023693.4:ENSCAFT00000000533.5:exon21:c.C2518T:p.R840C,	ENSCAFG00000023693	ADGB	ADGB	chr1	37852863	37852863	C	T	tolerated(0.09)	0/1	43,6	0.129	49
16	stopgain	ENSCAFG00000000854.4:ENSCAFT00000013348.4:exon3:c.A562T:p.R188X,ENSCAFG00000000854.4:ENSCAFT00000075568.1:exon2:c.A292T:p.R98X,	ENSCAFG00000000854	-	-	chr1	54997080	54997080	A	T	-	0/1	46,4	0.12	50
16	nonsynonymous SNV	ENSCAFG00000001380.4:ENSCAFT00000093036.1:exon8:c.G595A:p.A199T,ENSCAFG00000001380.4:ENSCAFT00000081058.1:exon8:c.G595A:p.A199T,ENSCAFG00000001380.4:ENSCAFT00000075792.1:exon8:c.G595A:p.A199T,ENSCAFG00000001380.4:ENSCAFT00000002138.4:exon8:c.G595A:p.A199T,	ENSCAFG00000001380	NTRK2	NTRK2	chr1	74728109	74728109	C	T	deleterious(0)	0/1	28,3	0.118	31
16	frameshift deletion	ENSCAFG00000004527.4:ENSCAFT00000007300.4:exon8:c.778_781del:p.F260fs,ENSCAFG00000004527.4:ENSCAFT00000061012.1:exon8:c.778_781del:p.F260fs,	ENSCAFG00000004527	MARK4	MARK4	chr1	110236951	110236954	AGAA	-	-	0/1	58,6	0.102	64
16	synonymous SNV	ENSCAFG00000004958.4:ENSCAFT00000007987.4:exon6:c.C873T:p.G291G,ENSCAFG00000004958.4:ENSCAFT00000092506.1:exon8:c.C1992T:p.G664G,	ENSCAFG00000004958	ATP1A3	ATP1A3	chr1	112333520	112333520	C	T	-	0/1	56,27	0.339	83
16	nonsynonymous SNV	ENSCAFG00000000543.4:ENSCAFT00000085315.1:exon16:c.A2275G:p.K759E,ENSCAFG00000000543.4:ENSCAFT00000068421.1:exon17:c.A2425G:p.K809E,ENSCAFG00000000543.4:ENSCAFT00000091767.1:exon18:c.A2461G:p.K821E,ENSCAFG00000000543.4:ENSCAFT00000079645.1:exon18:c.A2461G:p.K821E,ENSCAFG00000000543.4:ENSCAFT00000077435.1:exon17:c.A2425G:p.K809E,ENSCAFG00000000543.4:ENSCAFT00000000846.4:exon18:c.A2461G:p.K821E,ENS…	ENSCAFG00000000543	CEP12-	CEP12-	chr11	13209960	13209960	T	C	deleterious(0)	0/1	50,6	0.121	56
16	synonymous SNV	ENSCAFG00000002788.4:ENSCAFT00000004456.4:exon6:c.T672C:p.G224G,	ENSCAFG00000002788	TRA2A	TRA2A	chr14	37161577	37161577	A	G	-	0/1	18,4	0.199	22
16	synonymous SNV	ENSCAFG00000005511.5:ENSCAFT00000071174.1:exon16:c.C2118T:p.C706C,ENSCAFG00000005511.5:ENSCAFT00000008883.5:exon17:c.C2142T:p.C714C,	ENSCAFG00000005511	RPGRIP1	RPGRIP1	chr15	18356537	18356537	C	T	-	0/1	54,5	0.1	59
16	synonymous SNV	ENSCAFG00000006353.5:ENSCAFT00000010282.5:exon5:c.A507G:p.R169R,ENSCAFG00000006353.5:ENSCAFT00000085568.1:exon5:c.A546G:p.R182R,ENSCAFG00000006353.5:ENSCAFT00000010287.4:exon6:c.A612G:p.R204R,	ENSCAFG00000006353	METAP2	METAP2	chr15	35391082	35391082	A	G	-	0/1	21,4	0.186	25
16	nonsynonymous SNV	ENSCAFG00000008141.5:ENSCAFT00000074984.1:exon9:c.G1082T:p.R361L,ENSCAFG00000008141.5:ENSCAFT00000012962.5:exon9:c.G1577T:p.R526L,ENSCAFG00000008141.5:ENSCAFT00000065773.1:exon9:c.G1196T:p.R399L,	ENSCAFG00000008141	FBXW7	FBXW7	chr15	50192584	50192584	C	A	deleterious(0.01)	0/1	21,6	0.249	27
16	nonsynonymous SNV	ENSCAFG00000008317.6:ENSCAFT00000013251.5:exon24:c.A2339G:p.H780R,ENSCAFG00000008317.6:ENSCAFT00000071914.1:exon22:c.A2570G:p.H857R,ENSCAFG00000008317.6:ENSCAFT00000064081.1:exon23:c.A2597G:p.H866R,ENSCAFG00000008317.6:ENSCAFT00000069772.1:exon22:c.A2600G:p.H867R,	ENSCAFG00000008317	TMEM131L	TMEM131L	chr15	51397070	51397070	A	G	deleterious(0.02)	0/1	17,4	0.188	21
16	nonsynonymous SNV	ENSCAFG00000008583.2:ENSCAFT00000066826.1:exon4:c.G379A:p.V127I,ENSCAFG00000008583.2:ENSCAFT00000013613.2:exon4:c.G379A:p.V127I,	ENSCAFG00000008583	ASIC5	ASIC5	chr15	53362530	53362530	C	T	tolerated(1)	0/1	26,4	0.136	30
16	nonsynonymous SNV	ENSCAFG00000004955.6:ENSCAFT00000007959.6:exon43:c.C9844G:p.P3282A,	ENSCAFG00000004955	KMT2C	KMT2C	chr16	15990182	15990182	G	C	deleterious(0.04)	0/1	79,4	0.089	83
16	nonsynonymous SNV	ENSCAFG00000006453.4:ENSCAFT00000010425.4:exon3:c.G313T:p.V105L,	ENSCAFG00000006453	PPP2CB	PPP2CB	chr16	33557663	33557663	G	T	tolerated(0.06)	0/1	35,6	0.129	41
16	synonymous SNV	ENSCAFG00000006730.5:ENSCAFT00000044798.3:exon1:c.C85T:p.L29L,ENSCAFG00000006730.5:ENSCAFT00000072255.1:exon1:c.C85T:p.L29L,ENSCAFG00000006730.5:ENSCAFT00000010834.4:exon1:c.C85T:p.L29L,	ENSCAFG00000006730	TTC17	TTC17	chr18	26317872	26317872	G	A	-	0/1	11,4	0.247	15
16	nonsynonymous SNV	ENSCAFG00000044613.1:ENSCAFT00000045513.2:exon1:c.C547A:p.L183I,	ENSCAFG00000044613	OR5L1B	OR5L1	chr18	40079157	40079157	G	T	tolerated(0.2)	0/1	35,22	0.359	57
16	synonymous SNV	ENSCAFG00000016062.6:ENSCAFT00000025492.6:exon22:c.C2901T:p.D967D,ENSCAFG00000016062.6:ENSCAFT00000043815.2:exon22:c.C3411T:p.D1137D,ENSCAFG00000016062.6:ENSCAFT00000067114.1:exon21:c.C3396T:p.D1132D,ENSCAFG00000016062.6:ENSCAFT00000063601.1:exon21:c.C3219T:p.D1073D,ENSCAFG00000016062.6:ENSCAFT00000077070.1:exon21:c.C3330T:p.D1110D,ENSCAFG00000016062.6:ENSCAFT00000048525.3:exon23:c.C3021T:p.D1007…	ENSCAFG00000016062	MYRF	MYRF	chr18	54695099	54695099	G	A	-	0/1	14,15	0.5	29
16	nonsynonymous SNV	ENSCAFG00000016308.3:ENSCAFT00000025886.3:exon5:c.C795A:p.F265L,	ENSCAFG00000016308	PGA	-	chr18	55157954	55157954	G	T	tolerated(0.3)	0/1	24,4	0.13	28
16	synonymous SNV	ENSCAFG00000004880.5:ENSCAFT00000048846.2:exon20:c.T1974C:p.P658P,ENSCAFG00000004880.5:ENSCAFT00000061135.1:exon18:c.T1794C:p.P598P,ENSCAFG00000004880.5:ENSCAFT00000007857.5:exon19:c.T1893C:p.P631P,	ENSCAFG00000004880	CFAP221	CFAP221	chr19	30425314	30425314	A	G	-	0/1	63,4	0.067	67
16	synonymous SNV	ENSCAFG00000005717.5:ENSCAFT00000049028.3:exon110:c.T15765A:p.V5255V,ENSCAFG00000005717.5:ENSCAFT00000009249.5:exon85:c.T13494A:p.V4498V,ENSCAFG00000005717.5:ENSCAFT00000049432.3:exon109:c.T15765A:p.V5255V,	ENSCAFG00000005717	NEB	NEB	chr19	52765834	52765834	A	T	-	0/1	21,5	0.221	26
16	nonsynonymous SNV	ENSCAFG00000006888.4:ENSCAFT00000090817.1:exon10:c.G1339A:p.A447T,ENSCAFG00000006888.4:ENSCAFT00000011069.4:exon11:c.G1486A:p.A496T,	ENSCAFG00000006888	IL31RA	IL31RA	chr2	43186796	43186796	G	A	deleterious(0)	0/1	12,3	0.231	15
16	nonsynonymous SNV	ENSCAFG00000017392.5:ENSCAFT00000027562.5:exon5:c.A290G:p.D97G,	ENSCAFG00000017392	PRKCSH	PRKCSH	chr20	49914747	49914747	T	C	deleterious(0.01)	0/1	80,4	0.053	84
16	nonsynonymous SNV	ENSCAFG00000017872.5:ENSCAFT00000028356.5:exon4:c.A878G:p.E293G,ENSCAFG00000017872.5:ENSCAFT00000089962.1:exon2:c.A1037G:p.E346G,	ENSCAFG00000017872	ICAM5	ICAM5	chr20	50813389	50813389	T	C	tolerated(0.09)	0/1	41,5	0.129	46
16	nonsynonymous SNV	ENSCAFG00000005402.4:ENSCAFT00000008686.4:exon5:c.T499C:p.Y167H,	ENSCAFG00000005402	RPS3	-	chr21	23182090	23182090	A	G	deleterious(0)	0/1	41,3	0.097	44
16	nonsynonymous SNV	ENSCAFG00000007867.5:ENSCAFT00000082458.1:exon7:c.G823T:p.A275S,ENSCAFG00000007867.5:ENSCAFT00000012579.5:exon8:c.G979T:p.A327S,ENSCAFG00000007867.5:ENSCAFT00000083571.1:exon7:c.G979T:p.A327S,ENSCAFG00000007867.5:ENSCAFT00000073555.1:exon8:c.G979T:p.A327S,ENSCAFG00000007867.5:ENSCAFT00000012580.5:exon7:c.G979T:p.A327S,ENSCAFG00000007867.5:ENSCAFT00000012581.4:exon7:c.G979T:p.A327S,ENSCAFG00000007…	ENSCAFG00000007867	MICAL2	MICAL2	chr21	35250394	35250394	G	T	tolerated(0.69)	0/1	74,33	0.315	107
16	nonsynonymous SNV	ENSCAFG00000029934.2:ENSCAFT00000047711.2:exon2:c.C541T:p.R181W,ENSCAFG00000029934.2:ENSCAFT00000064788.1:exon3:c.C871T:p.R291W,ENSCAFG00000029934.2:ENSCAFT00000083167.1:exon2:c.C457T:p.R153W,	ENSCAFG00000029934	HS6ST3	HS6ST3	chr22	47258242	47258242	C	T	deleterious(0.01)	0/1	44,24	0.356	68
16	synonymous SNV	ENSCAFG00000005835.5:ENSCAFT00000009410.5:exon1:c.C276G:p.A92A,	ENSCAFG00000005835	ZIC2	ZIC2	chr22	49949053	49949053	C	G	-	0|1	29,2	0.11	31
16	synonymous SNV	ENSCAFG00000006143.3:ENSCAFT00000065164.1:exon5:c.C354T:p.F118F,ENSCAFG00000006143.3:ENSCAFT00000087981.1:exon5:c.C354T:p.F118F,ENSCAFG00000006143.3:ENSCAFT00000009956.3:exon5:c.C354T:p.F118F,	ENSCAFG00000006143	TUBGCP3	TUBGCP3	chr22	60219973	60219973	G	A	-	0/1	26,3	0.142	29
16	nonsynonymous SNV	ENSCAFG00000005510.6:ENSCAFT00000043134.2:exon1:c.A158G:p.K53R,	ENSCAFG00000005510	EOMES	EOMES	chr23	16506189	16506189	A	G	tolerated_low_confidence(0.18)	0/1	18,4	0.187	22
16	nonsynonymous SNV	ENSCAFG00000008387.6:ENSCAFT00000013326.5:exon1:c.A167G:p.D56G,ENSCAFG00000008387.6:ENSCAFT00000048921.3:exon1:c.A167G:p.D56G,	ENSCAFG00000008387	TSC22D2	TSC22D2	chr23	45087794	45087794	A	G	deleterious(0)	0/1	24,4	0.158	28
16	nonsynonymous SNV	ENSCAFG00000007356.5:ENSCAFT00000011771.5:exon13:c.G1361A:p.R454H,	ENSCAFG00000007356	BPIFB4	BPIFB4	chr24	22358435	22358435	G	A	tolerated(0.14)	0/1	53,4	0.085	57
16	nonsynonymous SNV	ENSCAFG00000007637.5:ENSCAFT00000047027.3:exon8:c.G953A:p.G318D,ENSCAFG00000007637.5:ENSCAFT00000012254.4:exon9:c.G992A:p.G331D,ENSCAFG00000007637.5:ENSCAFT00000076304.1:exon9:c.G992A:p.G331D,	ENSCAFG00000007637	ACSS2	ACSS2	chr24	23966026	23966026	G	A	deleterious(0)	0/1	87,4	0.051	91
16	nonsynonymous SNV	ENSCAFG00000007912.6:ENSCAFT00000012642.5:exon18:c.G2111A:p.R704Q,ENSCAFG00000007912.6:ENSCAFT00000044637.3:exon17:c.G1925A:p.R642Q,	ENSCAFG00000007912	TRPC4AP	TRPC4AP	chr24	24042287	24042287	C	T	tolerated(0.68)	0/1	77,37	0.333	114
16	nonsynonymous SNV	ENSCAFG00000009670.4:ENSCAFT00000015366.4:exon8:c.G815A:p.G272D,	ENSCAFG00000009670	RBPJL	RBPJL	chr24	32619858	32619858	G	A	deleterious(0)	0/1	30,4	0.148	34
16	nonsynonymous SNV	ENSCAFG00000010486.4:ENSCAFT00000016727.3:exon11:c.G1345A:p.A449T,ENSCAFG00000010486.4:ENSCAFT00000086436.1:exon10:c.G1232A:p.R411H,ENSCAFG00000010486.4:ENSCAFT00000073503.1:exon9:c.G1099A:p.A367T,	ENSCAFG00000010486	SLC13A3	SLC13A3	chr24	33816106	33816106	C	T	tolerated(0.46)	0/1	28,4	0.143	32
16	nonsynonymous SNV	ENSCAFG00000008575.4:ENSCAFT00000013611.4:exon18:c.A2869G:p.K957E,ENSCAFG00000008575.4:ENSCAFT00000091376.1:exon19:c.A2560G:p.K854E,ENSCAFG00000008575.4:ENSCAFT00000062607.1:exon18:c.A2683G:p.K895E,	ENSCAFG00000008575	CUX2	CUX2	chr26	8977917	8977917	A	G	deleterious(0)	0/1	22,4	0.167	26
16	nonsynonymous SNV	ENSCAFG00000010502.3:ENSCAFT00000016677.3:exon6:c.A1282G:p.N428D,	ENSCAFG00000010502	HNF1A	HNF1A	chr26	16820370	16820370	A	G	deleterious_low_confidence(0.02)	0/1	53,4	0.077	57
16	synonymous SNV	ENSCAFG00000011694.4:ENSCAFT00000084671.1:exon8:c.T1689C:p.I563I,ENSCAFG00000011694.4:ENSCAFT00000064853.1:exon8:c.T1689C:p.I563I,ENSCAFG00000011694.4:ENSCAFT00000085257.1:exon8:c.T1689C:p.I563I,ENSCAFG00000011694.4:ENSCAFT00000018602.4:exon8:c.T1689C:p.I563I,ENSCAFG00000011694.4:ENSCAFT00000087092.1:exon8:c.T1680C:p.I560I,ENSCAFG00000011694.4:ENSCAFT00000085209.1:exon8:c.T1689C:p.I563I,	ENSCAFG00000011694	SEZ6L	SEZ6L	chr26	20020914	20020914	T	C	-	0/1	81,4	0.056	85
16	nonsynonymous SNV	ENSCAFG00000007600.4:ENSCAFT00000068030.1:exon14:c.C2522T:p.S841L,ENSCAFG00000007600.4:ENSCAFT00000012237.4:exon14:c.C2555T:p.S852L,ENSCAFG00000007600.4:ENSCAFT00000071834.1:exon15:c.C2036T:p.S679L,ENSCAFG00000007600.4:ENSCAFT00000089917.1:exon14:c.C2522T:p.S841L,	ENSCAFG00000007600	SCN8A	SCN8A	chr27	3212887	3212887	G	A	deleterious(0.03)	0/1	39,10	0.265	49
16	nonsynonymous SNV	ENSCAFG00000010250.7:ENSCAFT00000093077.1:exon2:c.A106G:p.T36A,ENSCAFG00000010250.7:ENSCAFT00000016465.5:exon2:c.A115G:p.T39A,ENSCAFG00000010250.7:ENSCAFT00000084272.1:exon2:c.A106G:p.T36A,ENSCAFG00000010250.7:ENSCAFT00000092418.1:exon2:c.A106G:p.T36A,ENSCAFG00000010250.7:ENSCAFT00000060847.1:exon2:c.A106G:p.T36A,ENSCAFG00000010250.7:ENSCAFT00000067444.1:exon2:c.A73G:p.T25A,ENSCAFG00000010250.7:E…	ENSCAFG00000010250	KIF21A	KIF21A	chr27	14258915	14258915	A	G	deleterious(0)	0/1	18,4	0.214	22
16	synonymous SNV	ENSCAFG00000009685.4:ENSCAFT00000063530.1:exon5:c.C621T:p.S207S,ENSCAFG00000009685.4:ENSCAFT00000015388.4:exon6:c.C630T:p.S210S,ENSCAFG00000009685.4:ENSCAFT00000067293.1:exon5:c.C621T:p.S207S,ENSCAFG00000009685.4:ENSCAFT00000084967.1:exon4:c.C525T:p.S175S,ENSCAFG00000009685.4:ENSCAFT00000079340.1:exon5:c.C621T:p.S207S,ENSCAFG00000009685.4:ENSCAFT00000086378.1:exon5:c.C621T:p.S207S,ENSCAFG00000009…	ENSCAFG00000009685	SEC31B	SEC31B	chr28	13234687	13234687	G	A	-	0/1	75,4	0.08	79
16	synonymous SNV	ENSCAFG00000008310.5:ENSCAFT00000013195.5:exon2:c.C810T:p.S270S,	ENSCAFG00000008310	ZFHX4	ZFHX4	chr29	24689961	24689961	C	T	-	0/1	51,14	0.231	65
16	synonymous SNV	ENSCAFG00000016743.4:ENSCAFT00000075153.1:exon13:c.G1242A:p.P414P,ENSCAFG00000016743.4:ENSCAFT00000026527.4:exon14:c.G1485A:p.P495P,ENSCAFG00000016743.4:ENSCAFT00000082965.1:exon14:c.G1173A:p.P391P,ENSCAFG00000016743.4:ENSCAFT00000091085.1:exon10:c.G1830A:p.P610P,	ENSCAFG00000016743	GAK	GAK	chr3	91611094	91611094	G	A	-	0/1	25,3	0.143	28
16	nonsynonymous SNV	ENSCAFG00000009662.6:ENSCAFT00000015349.5:exon21:c.A7727G:p.K2576R,ENSCAFG00000009662.6:ENSCAFT00000015348.5:exon20:c.A7100G:p.K2367R,	ENSCAFG00000009662	MGA	MGA	chr30	8797317	8797317	A	G	deleterious(0.02)	0/1	21,4	0.174	25
16	stopgain	ENSCAFG00000013606.4:ENSCAFT00000021574.4:exon32:c.C6145T:p.R2049X,ENSCAFG00000013606.4:ENSCAFT00000080544.1:exon31:c.C5941T:p.R1981X,	ENSCAFG00000013606	SPG11	SPG11	chr30	11240877	11240877	G	A	-	0/1	98,4	0.05	102
16	nonsynonymous SNV	ENSCAFG00000008919.4:ENSCAFT00000076762.1:exon14:c.G1487A:p.R496Q,ENSCAFG00000008919.4:ENSCAFT00000014169.4:exon12:c.G1277A:p.R426Q,ENSCAFG00000008919.4:ENSCAFT00000065036.1:exon15:c.G1523A:p.R508Q,ENSCAFG00000008919.4:ENSCAFT00000050857.2:exon14:c.G1412A:p.R471Q,	ENSCAFG00000008919	RASGEF1B	RASGEF1B	chr32	5550629	5550629	C	T	tolerated(0.24)	0/1	41,6	0.148	47
16	stopgain	ENSCAFG00000012281.5:ENSCAFT00000019632.5:exon40:c.C5905T:p.R1969X,ENSCAFG00000012281.5:ENSCAFT00000061127.1:exon39:c.C5446T:p.R1816X,ENSCAFG00000012281.5:ENSCAFT00000019600.4:exon39:c.C5443T:p.R1815X,	ENSCAFG00000012281	KALRN	KALRN	chr33	27693479	27693479	C	T	-	0/1	21,3	0.176	24
16	nonsynonymous SNV	ENSCAFG00000013275.5:ENSCAFT00000063157.1:exon17:c.G1928A:p.C643Y,ENSCAFG00000013275.5:ENSCAFT00000089174.1:exon20:c.G2078A:p.C693Y,ENSCAFG00000013275.5:ENSCAFT00000083663.1:exon19:c.G2024A:p.C675Y,ENSCAFG00000013275.5:ENSCAFT00000083128.1:exon21:c.G2177A:p.C726Y,ENSCAFG00000013275.5:ENSCAFT00000073994.1:exon21:c.G2111A:p.C704Y,ENSCAFG00000013275.5:ENSCAFT00000071638.1:exon16:c.G1763A:p.C588Y,	ENSCAFG00000013275	DLG1	DLG1	chr33	30038719	30038719	C	T	tolerated(0.08)	0/1	22,4	0.176	26
16	nonsynonymous SNV	ENSCAFG00000025130.3:ENSCAFT00000016648.4:exon5:c.C767T:p.T256M,	ENSCAFG00000025130	SLC6A19	SLC6A19	chr34	11336593	11336593	G	A	deleterious(0.01)	0/1	29,10	0.285	39
16	nonsynonymous SNV	ENSCAFG00000014025.4:ENSCAFT00000070680.1:exon134:c.G34585A:p.V11529I,ENSCAFG00000014025.4:ENSCAFT00000061435.1:exon134:c.G34771A:p.V11591I,ENSCAFG00000014025.4:ENSCAFT00000022319.4:exon133:c.G34210A:p.V11404I,	ENSCAFG00000014025	TTN	-	chr36	22210187	22210187	C	T	-	0/1	87,53	0.396	140
16	nonsynonymous SNV	ENSCAFG00000014025.4:ENSCAFT00000070680.1:exon6:c.C802G:p.P268A,ENSCAFG00000014025.4:ENSCAFT00000068029.1:exon6:c.C802G:p.P268A,ENSCAFG00000014025.4:ENSCAFT00000061435.1:exon6:c.C802G:p.P268A,ENSCAFG00000014025.4:ENSCAFT00000022319.4:exon6:c.C802G:p.P268A,	ENSCAFG00000014025	TTN	-	chr36	22409737	22409737	G	C	-	0|1	113,4	0.054	117
16	synonymous SNV	ENSCAFG00000009823.5:ENSCAFT00000015597.5:exon22:c.G4239A:p.P1413P,	ENSCAFG00000009823	IGSF9B	IGSF9B	chr5	1320217	1320217	G	A	-	0/1	49,5	0.097	54
16	synonymous SNV	ENSCAFG00000018530.5:ENSCAFT00000072751.1:exon1:c.G315T:p.S105S,	ENSCAFG00000018530	MAP2K3	MAP2K3	chr5	42701150	42701150	G	T	-	0/1	8,4	0.298	12
16	nonsynonymous SNV	ENSCAFG00000020124.5:ENSCAFT00000032030.5:exon9:c.C1070T:p.T357M,ENSCAFG00000020124.5:ENSCAFT00000043611.2:exon8:c.C977T:p.T326M,	ENSCAFG00000020124	-	CLEC18C	chr5	76267416	76267416	C	T	deleterious(0.04)	0/1	31,3	0.125	34
16	nonsynonymous SNV	ENSCAFG00000019360.4:ENSCAFT00000074770.1:exon1:c.G190A:p.V64M,ENSCAFG00000019360.4:ENSCAFT00000069702.1:exon3:c.G190A:p.V64M,ENSCAFG00000019360.4:ENSCAFT00000062208.1:exon1:c.G190A:p.V64M,	ENSCAFG00000019360	-	AC-93525.1	chr6	38519767	38519767	C	T	-	0/1	22,4	0.157	26
16	nonsynonymous SNV	ENSCAFG00000011756.5:ENSCAFT00000018802.5:exon22:c.C4373T:p.A1458V,ENSCAFG00000011756.5:ENSCAFT00000002159.3:exon22:c.C4373T:p.A1458V,	ENSCAFG00000011756	PLXNA2	PLXNA2	chr7	6881126	6881126	G	A	deleterious(0)	0/1	66,5	0.093	71
16	nonsynonymous SNV	ENSCAFG00000016381.4:ENSCAFT00000025968.4:exon2:c.A793G:p.S265G,	ENSCAFG00000016381	DEGS1	DEGS1	chr7	40151436	40151436	T	C	deleterious(0.02)	0/1	43,4	0.097	47
16	nonsynonymous SNV	ENSCAFG00000018846.6:ENSCAFT00000070098.1:exon15:c.C1757G:p.T586S,ENSCAFG00000018846.6:ENSCAFT00000029918.6:exon15:c.C1634G:p.T545S,ENSCAFG00000018846.6:ENSCAFT00000084730.1:exon27:c.C3737G:p.T1246S,ENSCAFG00000018846.6:ENSCAFT00000075660.1:exon28:c.C1676G:p.T559S,ENSCAFG00000018846.6:ENSCAFT00000060130.1:exon26:c.C3563G:p.T1188S,ENSCAFG00000018846.6:ENSCAFT00000072638.1:exon26:c.C3608G:p.T1203S,…	ENSCAFG00000018846	SPIRE1	CEP76	chr7	77865539	77865539	G	C	tolerated(1)	0/1	71,5	0.081	76
16	synonymous SNV	ENSCAFG00000014989.4:ENSCAFT00000023790.4:exon7:c.T639C:p.S213S,	ENSCAFG00000014989	WDHD1	WDHD1	chr8	30858885	30858885	A	G	-	0/1	18,4	0.177	22
16	nonsynonymous SNV	ENSCAFG00000017729.4:ENSCAFT00000028127.4:exon13:c.T1883C:p.L628P,	ENSCAFG00000017729	ATG2B	ATG2B	chr8	65083244	65083244	A	G	deleterious(0)	0/1	11,3	0.231	14
16	frameshift deletion	ENSCAFG00000018075.4:ENSCAFT00000028719.4:exon11:c.1425_1426del:p.F475fs,ENSCAFG00000018075.4:ENSCAFT00000085506.1:exon8:c.1176_1177del:p.F392fs,ENSCAFG00000018075.4:ENSCAFT00000086511.1:exon10:c.1350_1351del:p.F450fs,	ENSCAFG00000018075	TRAF3	TRAF3	chr8	70789363	70789364	TG	-	-	0/1	19,40	0.655	59
16	synonymous SNV	ENSCAFG00000006054.5:ENSCAFT00000047830.2:exon5:c.G606A:p.A202A,ENSCAFG00000006054.5:ENSCAFT00000009785.4:exon4:c.G729A:p.A243A,ENSCAFG00000006054.5:ENSCAFT00000077447.1:exon5:c.G606A:p.A202A,	ENSCAFG00000006054	SLC16A3	SLC16A3	chr9	111806	111806	C	T	-	0/1	21,4	0.136	25
16	nonsynonymous SNV	ENSCAFG00000030569.2:ENSCAFT00000047458.2:exon2:c.A154G:p.S52G,	ENSCAFG00000030569	SDF2	SDF2	chr9	42854543	42854543	T	C	deleterious(0.03)	0/1	18,4	0.168	22
16	synonymous SNV	ENSCAFG00000019685.3:ENSCAFT00000031299.1:exon3:c.C504T:p.C168C,	ENSCAFG00000019685	CARD9	CARD9	chr9	49115090	49115090	C	T	-	0/1	11,4	0.273	15
16	synonymous SNV	ENSCAFG00000023562.4:ENSCAFT00000036277.5:exon17:c.G2022A:p.Q674Q,ENSCAFG00000023562.4:ENSCAFT00000078039.1:exon17:c.G2010A:p.Q670Q,	ENSCAFG00000023562	DMD	DMD	chrX	27675908	27675908	C	T	-	0/1	36,3	0.107	39
17	synonymous SNV	ENSCAFG00000000008.4:ENSCAFT00000068667.1:exon1:c.C30T:p.N10N,ENSCAFG00000000008.4:ENSCAFT00000000009.4:exon1:c.C30T:p.N10N,	ENSCAFG00000000008	TXNL4A	TXNL4A	chr1	722754	722754	C	T	-	0/1	87,4	0.046	91
17	nonsynonymous SNV	ENSCAFG00000030263.2:ENSCAFT00000046844.2:exon1:c.A1G:p.M1V,	ENSCAFG00000030263	GJE1	GJE1	chr1	33820248	33820248	A	G	-	0/1	42,4	0.107	46
17	nonsynonymous SNV	ENSCAFG00000000667.6:ENSCAFT00000043020.3:exon11:c.G1231A:p.D411N,ENSCAFG00000000667.6:ENSCAFT00000093326.1:exon11:c.G1387A:p.D463N,ENSCAFG00000000667.6:ENSCAFT00000091820.1:exon10:c.G1198A:p.D400N,ENSCAFG00000000667.6:ENSCAFT00000001034.5:exon8:c.G1036A:p.D346N,ENSCAFG00000000667.6:ENSCAFT00000073751.1:exon10:c.G1192A:p.D398N,ENSCAFG00000000667.6:ENSCAFT00000068402.1:exon11:c.G1387A:p.D463N,	ENSCAFG00000000667	FNDC1	FNDC1	chr1	48561469	48561469	G	A	tolerated(0.3)	0/1	9,17	0.609	26
17	stopgain	ENSCAFG00000044777.1:ENSCAFT00000089441.1:exon1:c.G715T:p.E239X,	ENSCAFG00000044777	ZBTB32	ZBTB32	chr1	116916342	116916342	C	A	-	0/1	61,73	0.52	134
17	nonsynonymous SNV	ENSCAFG00000000700.5:ENSCAFT00000001094.4:exon2:c.G337A:p.E113K,ENSCAFG00000000700.5:ENSCAFT00000049390.3:exon2:c.G337A:p.E113K,	ENSCAFG00000000700	MOV1-L1	MOV1-L1	chr10	17139142	17139142	C	T	tolerated(0.26)	0/1	15,11	0.45	26
17	nonsynonymous SNV	ENSCAFG00000000827.5:ENSCAFT00000049571.3:exon17:c.T2588C:p.V863A,	ENSCAFG00000000827	SMC1B	SMC1B	chr10	20697616	20697616	T	C	deleterious(0)	0/1	24,4	0.157	28
17	nonsynonymous SNV	ENSCAFG00000003407.4:ENSCAFT00000090540.1:exon3:c.C44T:p.P15L,ENSCAFG00000003407.4:ENSCAFT00000005489.4:exon2:c.C44T:p.P15L,	ENSCAFG00000003407	ADD2	ADD2	chr10	69089821	69089821	G	A	deleterious(0)	0/1	37,22	0.378	59
17	nonsynonymous SNV	ENSCAFG00000000806.4:ENSCAFT00000001264.4:exon2:c.A545G:p.Q182R,	ENSCAFG00000000806	-	HLA-DQB1	chr12	2306823	2306823	T	C	tolerated(0.07)	0/1	61,18	0.271	79
17	nonsynonymous SNV	ENSCAFG00000000961.3:ENSCAFT00000001486.3:exon2:c.A355T:p.I119F,	ENSCAFG00000000961	-	SYT17	chr13	19684924	19684924	T	A	deleterious(0.01)	0/1	108,158	0.608	266
17	nonsynonymous SNV	ENSCAFG00000001433.5:ENSCAFT00000083528.1:exon24:c.G2786A:p.R929H,ENSCAFG00000001433.5:ENSCAFT00000060448.1:exon23:c.G2702A:p.R901H,ENSCAFG00000001433.5:ENSCAFT00000082428.1:exon23:c.G2705A:p.R902H,ENSCAFG00000001433.5:ENSCAFT00000002240.4:exon25:c.G3248A:p.R1083H,ENSCAFG00000001433.5:ENSCAFT00000065106.1:exon25:c.G2846A:p.R949H,ENSCAFG00000001433.5:ENSCAFT00000047267.3:exon23:c.G2849A:p.R950H,EN…	ENSCAFG00000001433	PLEC	PLEC	chr13	37464040	37464040	C	T	tolerated(0.15)	0/1	53,69	0.582	122
17	nonsynonymous SNV	ENSCAFG00000032670.2:ENSCAFT00000001939.4:exon1:c.A704G:p.K235R,	ENSCAFG00000032670	OR2L13	OR2L13	chr14	2180826	2180826	T	C	tolerated(0.05)	0/1	157,5	0.034	162
17	nonsynonymous SNV	ENSCAFG00000001862.4:ENSCAFT00000002945.4:exon4:c.T2181G:p.C727W,	ENSCAFG00000001862	ZNF8-4B	ZNF8-4B	chr14	15245195	15245195	T	G	deleterious(0.02)	0/1	98,64	0.379	162
17	nonsynonymous SNV	ENSCAFG00000005972.4:ENSCAFT00000009642.4:exon4:c.G1014T:p.R338S,	ENSCAFG00000005972	ALX1	ALX1	chr15	26858408	26858408	G	T	deleterious(0)	0/1	89,50	0.374	139
17	synonymous SNV	ENSCAFG00000023178.4:ENSCAFT00000013402.3:exon6:c.G1635A:p.S545S,ENSCAFG00000023178.4:ENSCAFT00000043702.3:exon5:c.G1698A:p.S566S,	ENSCAFG00000023178	FGA	FGA	chr15	52240661	52240661	C	T	-	0/1	91,64	0.435	155
17	nonsynonymous SNV	ENSCAFG00000004912.4:ENSCAFT00000062195.1:exon4:c.A428G:p.K143R,ENSCAFG00000004912.4:ENSCAFT00000007917.4:exon6:c.A800G:p.K267R,ENSCAFG00000004912.4:ENSCAFT00000090397.1:exon6:c.A419G:p.K140R,	ENSCAFG00000004912	PRKAG2	PRKAG2	chr16	15548986	15548986	T	C	deleterious(0.01)	0/1	57,4	0.087	61
17	nonsynonymous SNV	ENSCAFG00000007236.4:ENSCAFT00000011597.4:exon1:c.C181T:p.R61C,	ENSCAFG00000007236	TRIML2	TRIML2	chr16	42984483	42984483	C	T	tolerated(0.07)	0/1	47,26	0.364	73
17	nonsynonymous SNV	ENSCAFG00000003228.4:ENSCAFT00000005177.4:exon13:c.C1559T:p.A520V,	ENSCAFG00000003228	PXDN	PXDN	chr17	855766	855766	G	A	tolerated(0.08)	0/1	51,23	0.327	74
17	nonsynonymous SNV	ENSCAFG00000032365.2:ENSCAFT00000048303.2:exon4:c.A445G:p.T149A,ENSCAFG00000032365.2:ENSCAFT00000043381.2:exon3:c.A397G:p.T133A,	ENSCAFG00000032365	DNAJC5G	DNAJC5G	chr17	21254924	21254924	A	G	tolerated(0.73)	0/1	101,4	0.04	105
17	synonymous SNV	ENSCAFG00000005144.4:ENSCAFT00000008283.4:exon5:c.G270A:p.E90E,	ENSCAFG00000005144	FNDC4	FNDC4	chr17	21430882	21430882	C	T	-	0/1	43,29	0.418	72
17	nonsynonymous SNV	ENSCAFG00000003334.5:ENSCAFT00000005349.5:exon17:c.T8341C:p.F2781L,	ENSCAFG00000003334	ABCA13	-	chr18	210550	210550	T	C	tolerated(0.09)	0/1	27,4	0.13	31
17	nonsynonymous SNV	ENSCAFG00000012081.4:ENSCAFT00000059633.1:exon16:c.G2531A:p.C844Y,ENSCAFG00000012081.4:ENSCAFT00000019325.4:exon16:c.G2483A:p.C828Y,	ENSCAFG00000012081	PC	PC	chr18	50505456	50505456	G	A	deleterious(0.01)	0/1	72,4	0.054	76
17	nonsynonymous SNV	ENSCAFG00000015888.5:ENSCAFT00000025180.4:exon10:c.C1511T:p.P504L,ENSCAFG00000015888.5:ENSCAFT00000071352.1:exon8:c.C1541T:p.P514L,ENSCAFG00000015888.5:ENSCAFT00000046291.3:exon8:c.C1541T:p.P514L,	ENSCAFG00000015888	INCENP	INCENP	chr18	54372443	54372443	G	A	deleterious(0)	0/1	46,41	0.449	87
17	nonsynonymous SNV	ENSCAFG00000011247.4:ENSCAFT00000066471.1:exon1:c.G67A:p.A23T,ENSCAFG00000011247.4:ENSCAFT00000017876.4:exon2:c.G235A:p.A79T,	ENSCAFG00000011247	LAPTM5	LAPTM5	chr2	70188548	70188548	G	A	tolerated(0.43)	0/1	23,4	0.142	27
17	synonymous SNV	ENSCAFG00000048855.1:ENSCAFT00000024580.3:exon3:c.C1098T:p.C366C,	ENSCAFG00000048855	TAS1R2	TAS1R2	chr2	79723626	79723626	C	T	-	0/1	77,4	0.049	81
17	nonsynonymous SNV	ENSCAFG00000009389.7:ENSCAFT00000014946.6:exon3:c.A358G:p.R120G,ENSCAFG00000009389.7:ENSCAFT00000042741.3:exon3:c.A265G:p.R89G,	ENSCAFG00000009389	NISCH	NISCH	chr20	37309731	37309731	T	C	deleterious(0)	0/1	77,5	0.071	82
17	stopgain	ENSCAFG00000013392.4:ENSCAFT00000060515.1:exon3:c.G1999T:p.E667X,ENSCAFG00000013392.4:ENSCAFT00000021260.4:exon3:c.G1999T:p.E667X,ENSCAFG00000013392.4:ENSCAFT00000064752.1:exon3:c.G1999T:p.E667X,ENSCAFG00000013392.4:ENSCAFT00000072365.1:exon3:c.G1999T:p.E667X,ENSCAFG00000013392.4:ENSCAFT00000077709.1:exon3:c.G1999T:p.E667X,ENSCAFG00000013392.4:ENSCAFT00000071377.1:exon3:c.G1999T:p.E667X,ENSCAFG00…	ENSCAFG00000013392	SETD2	SETD2	chr20	41711709	41711709	G	T	-	0/1	16,52	0.76	68
17	nonsynonymous SNV	ENSCAFG00000013517.4:ENSCAFT00000090253.1:exon12:c.C1867T:p.R623W,ENSCAFG00000013517.4:ENSCAFT00000069983.1:exon12:c.C1867T:p.R623W,ENSCAFG00000013517.4:ENSCAFT00000076503.1:exon10:c.C1882T:p.R628W,ENSCAFG00000013517.4:ENSCAFT00000071581.1:exon11:c.C1783T:p.R595W,ENSCAFG00000013517.4:ENSCAFT00000060390.1:exon12:c.C1867T:p.R623W,ENSCAFG00000013517.4:ENSCAFT00000073077.1:exon12:c.C1867T:p.R623W,ENS…	ENSCAFG00000013517	NBEAL2	NBEAL2	chr20	41820175	41820175	G	A	deleterious(0.02)	0/1	62,4	0.09	66
17	synonymous SNV	ENSCAFG00000048053.1:ENSCAFT00000079810.1:exon5:c.T909C:p.H303H,	ENSCAFG00000048053	-	ZNF559-ZNF177	chr20	51317910	51317910	A	G	-	0/1	79,60	0.428	139
17	synonymous SNV	ENSCAFG00000019409.4:ENSCAFT00000030858.4:exon2:c.G18A:p.K6K,	ENSCAFG00000019409	LSM7	LSM7	chr20	56730586	56730586	G	A	-	0|1	3,2	0.333	5
17	nonsynonymous SNV	ENSCAFG00000019409.4:ENSCAFT00000030858.4:exon2:c.A20G:p.K7R,	ENSCAFG00000019409	LSM7	LSM7	chr20	56730588	56730588	A	G	tolerated(0.17)	0|1	3,2	0.333	5
17	frameshift insertion	ENSCAFG00000023712.4:ENSCAFT00000036635.4:exon1:c.1132dupA:p.P377fs,	ENSCAFG00000023712	MEX3D	MEX3D	chr20	57322209	57322209	-	A	-	0/1	14,13	0.5	27
17	synonymous SNV	ENSCAFG00000019648.4:ENSCAFT00000047485.2:exon12:c.C1813T:p.L605L,	ENSCAFG00000019648	TMEM259	TMEM259	chr20	57743190	57743190	C	T	-	0/1	13,4	0.231	17
17	nonsynonymous SNV	ENSCAFG00000005293.4:ENSCAFT00000008533.4:exon1:c.C585A:p.N195K,	ENSCAFG00000005293	SLITRK5	SLITRK5	chr22	39385250	39385250	C	A	deleterious(0)	0/1	128,73	0.365	201
17	nonsynonymous SNV	ENSCAFG00000005311.5:ENSCAFT00000008556.5:exon8:c.C1655T:p.A552V,	ENSCAFG00000005311	GPC5	GPC5	chr22	43870344	43870344	C	T	tolerated(0.37)	0/1	96,69	0.405	165
17	nonsynonymous SNV	ENSCAFG00000011996.4:ENSCAFT00000089436.1:exon6:c.C1078T:p.R360W,ENSCAFG00000011996.4:ENSCAFT00000019057.4:exon6:c.C916T:p.R306W,ENSCAFG00000011996.4:ENSCAFT00000081835.1:exon6:c.C1543T:p.R515W,	ENSCAFG00000011996	TFAP2C	TFAP2C	chr24	41794637	41794637	C	T	deleterious(0)	0/1	43,43	0.502	86
17	synonymous SNV	ENSCAFG00000012436.4:ENSCAFT00000019847.4:exon14:c.C2307T:p.S769S,ENSCAFG00000012436.4:ENSCAFT00000077017.1:exon14:c.C2841T:p.S947S,	ENSCAFG00000012436	CDH4	CDH4	chr24	46062614	46062614	C	T	-	0/1	18,4	0.176	22
17	nonsynonymous SNV	ENSCAFG00000007418.5:ENSCAFT00000046118.3:exon22:c.A3103G:p.R1035G,ENSCAFG00000007418.5:ENSCAFT00000011897.5:exon22:c.A256G:p.R86G,	ENSCAFG00000007418	RNF17	RNF17	chr25	18658937	18658937	T	C	deleterious(0)	0/1	37,15	0.306	52
17	nonsynonymous SNV	ENSCAFG00000024641.4:ENSCAFT00000038005.3:exon3:c.G239A:p.R80H,ENSCAFG00000024641.4:ENSCAFT00000018343.5:exon6:c.G4751A:p.R1584H,ENSCAFG00000024641.4:ENSCAFT00000071187.1:exon3:c.G473A:p.R158H,	ENSCAFG00000024641	KIAA1671	KIAA1671	chr26	19265416	19265416	G	A	tolerated(0.1)	0/1	33,28	0.446	61
17	nonsynonymous SNV	ENSCAFG00000013613.4:ENSCAFT00000021576.4:exon4:c.C895T:p.H299Y,ENSCAFG00000013613.4:ENSCAFT00000062949.1:exon3:c.C883T:p.H295Y,	ENSCAFG00000013613	PRAME	PRAME	chr26	27126958	27126958	G	A	tolerated(0.33)	0/1	15,3	0.214	18
17	nonsynonymous SNV	ENSCAFG00000013995.5:ENSCAFT00000022235.4:exon21:c.C3100T:p.P1034S,ENSCAFG00000013995.5:ENSCAFT00000049789.3:exon24:c.C3667T:p.P1223S,	ENSCAFG00000013995	CABIN1	CABIN1	chr26	28452703	28452703	G	A	deleterious(0.03)	0/1	48,44	0.478	92
17	nonsynonymous SNV	ENSCAFG00000006672.5:ENSCAFT00000044328.2:exon4:c.A188G:p.Y63C,	ENSCAFG00000006672	CHAT	CHAT	chr28	1484937	1484937	A	G	deleterious(0)	0/1	34,3	0.103	37
17	stopgain	ENSCAFG00000007137.4:ENSCAFT00000075399.1:exon7:c.G1454A:p.W485X,ENSCAFG00000007137.4:ENSCAFT00000011446.4:exon8:c.G1520A:p.W507X,ENSCAFG00000007137.4:ENSCAFT00000071275.1:exon8:c.G1436A:p.W479X,	ENSCAFG00000007137	TOX	TOX	chr29	9545014	9545014	C	T	-	0/1	69,4	0.059	73
17	synonymous SNV	ENSCAFG00000008598.4:ENSCAFT00000075378.1:exon9:c.A1371G:p.K457K,ENSCAFG00000008598.4:ENSCAFT00000076687.1:exon8:c.A1164G:p.K388K,ENSCAFG00000008598.4:ENSCAFT00000068698.1:exon8:c.A1134G:p.K378K,ENSCAFG00000008598.4:ENSCAFT00000076995.1:exon9:c.A1371G:p.K457K,ENSCAFG00000008598.4:ENSCAFT00000077206.1:exon9:c.A1371G:p.K457K,ENSCAFG00000008598.4:ENSCAFT00000013651.4:exon9:c.A1371G:p.K457K,	ENSCAFG00000008598	LRRCC1	LRRCC1	chr29	31699099	31699099	A	G	-	0/1	5,3	0.427	8
17	nonsynonymous SNV	ENSCAFG00000016608.5:ENSCAFT00000026343.4:exon34:c.C3853A:p.H1285N,ENSCAFG00000016608.5:ENSCAFT00000044488.3:exon34:c.C4108A:p.H1370N,ENSCAFG00000016608.5:ENSCAFT00000082842.1:exon38:c.C4243A:p.H1415N,ENSCAFG00000016608.5:ENSCAFT00000062102.1:exon37:c.C4231A:p.H1411N,ENSCAFG00000016608.5:ENSCAFT00000076619.1:exon37:c.C4216A:p.H1406N,ENSCAFG00000016608.5:ENSCAFT00000090541.1:exon37:c.C4219A:p.H140…	ENSCAFG00000016608	SLIT2	SLIT2	chr3	88967572	88967572	G	T	deleterious(0.01)	0/1	38,34	0.49	72
17	nonsynonymous SNV	ENSCAFG00000016285.4:ENSCAFT00000025839.4:exon6:c.C610T:p.R204W,ENSCAFG00000016285.4:ENSCAFT00000092078.1:exon6:c.C610T:p.R204W,ENSCAFG00000016285.4:ENSCAFT00000025834.4:exon6:c.C610T:p.R204W,ENSCAFG00000016285.4:ENSCAFT00000076175.1:exon6:c.C610T:p.R204W,ENSCAFG00000016285.4:ENSCAFT00000064575.1:exon6:c.C610T:p.R204W,	ENSCAFG00000016285	-	MYZAP	chr30	22796162	22796162	C	T	deleterious(0.01)	0/1	101,87	0.453	188
17	nonsynonymous SNV	ENSCAFG00000010351.4:ENSCAFT00000016451.3:exon1:c.A74T:p.Q25L,ENSCAFG00000010351.4:ENSCAFT00000090160.1:exon1:c.A65T:p.Q22L,	ENSCAFG00000010351	TFF1	TFF1	chr31	36684476	36684476	T	A	deleterious(0.03)	0/1	68,4	0.069	72
17	nonsynonymous SNV	ENSCAFG00000010769.4:ENSCAFT00000091885.1:exon9:c.G1156A:p.V386M,ENSCAFG00000010769.4:ENSCAFT00000060197.1:exon9:c.G1156A:p.V386M,ENSCAFG00000010769.4:ENSCAFT00000074665.1:exon9:c.G1156A:p.V386M,ENSCAFG00000010769.4:ENSCAFT00000017140.4:exon9:c.G1156A:p.V386M,ENSCAFG00000010769.4:ENSCAFT00000084028.1:exon8:c.G985A:p.V329M,	ENSCAFG00000010769	MANBA	MANBA	chr32	24096935	24096935	C	T	deleterious(0.01)	0/1	79,4	0.051	83
17	nonsynonymous SNV	ENSCAFG00000011615.4:ENSCAFT00000018446.4:exon15:c.T4760C:p.L1587S,ENSCAFG00000011615.4:ENSCAFT00000072753.1:exon14:c.T4523C:p.L1508S,	ENSCAFG00000011615	GOLGB1	GOLGB1	chr33	24965938	24965938	A	G	deleterious(0)	0/1	66,57	0.46	123
17	synonymous SNV	ENSCAFG00000011212.4:ENSCAFT00000017863.4:exon4:c.T774C:p.D258D,ENSCAFG00000011212.4:ENSCAFT00000080543.1:exon3:c.T774C:p.D258D,	ENSCAFG00000011212	PIK3CA	PIK3CA	chr34	12650465	12650465	T	C	-	0/1	70,4	0.074	74
17	nonsynonymous SNV	ENSCAFG00000009934.5:ENSCAFT00000044892.2:exon3:c.G1908C:p.Q636H,ENSCAFG00000009934.5:ENSCAFT00000015794.5:exon3:c.G1908C:p.Q636H,	ENSCAFG00000009934	ATXN1	ATXN1	chr35	15475091	15475091	C	G	deleterious(0)	0/1	87,53	0.376	140
17	nonsynonymous SNV	ENSCAFG00000013522.5:ENSCAFT00000042787.3:exon4:c.T523C:p.S175P,ENSCAFG00000013522.5:ENSCAFT00000021460.4:exon4:c.T523C:p.S175P,ENSCAFG00000013522.5:ENSCAFT00000090780.1:exon4:c.T328C:p.S110P,	ENSCAFG00000013522	AGPS	AGPS	chr36	21175395	21175395	T	C	tolerated(0.37)	0/1	22,4	0.125	26
17	synonymous SNV	ENSCAFG00000010034.5:ENSCAFT00000015962.4:exon42:c.G6768T:p.G2256G,	ENSCAFG00000010034	RYR2	RYR2	chr4	2556201	2556201	C	A	-	0/1	17,28	0.621	45
17	nonsynonymous SNV	ENSCAFG00000014213.4:ENSCAFT00000022558.4:exon1:c.A12C:p.Q4H,	ENSCAFG00000014213	POU2AF1	POU2AF1	chr5	21671569	21671569	A	C	deleterious(0.02)	0/1	25,14	0.385	39
17	nonsynonymous SNV	ENSCAFG00000016714.4:ENSCAFT00000086831.1:exon6:c.C712A:p.R238S,ENSCAFG00000016714.4:ENSCAFT00000026465.4:exon8:c.C781A:p.R261S,ENSCAFG00000016714.4:ENSCAFT00000081814.1:exon8:c.C973A:p.R325S,	ENSCAFG00000016714	TP53	TP53	chr5	32563056	32563056	G	T	deleterious(0)	0/1	64,51	0.467	115
17	stopgain	ENSCAFG00000016714.4:ENSCAFT00000086831.1:exon5:c.T609A:p.C203X,ENSCAFG00000016714.4:ENSCAFT00000026465.4:exon7:c.T678A:p.C226X,ENSCAFG00000016714.4:ENSCAFT00000081814.1:exon7:c.T870A:p.C290X,	ENSCAFG00000016714	TP53	TP53	chr5	32563420	32563420	A	T	-	0/1	53,27	0.34	80
17	nonsynonymous SNV	ENSCAFG00000023464.3:ENSCAFT00000026827.4:exon2:c.G167A:p.R56H,ENSCAFG00000023464.3:ENSCAFT00000064778.1:exon2:c.G167A:p.R56H,	ENSCAFG00000023464	ALOX12B	ALOX12B	chr5	32909277	32909277	C	T	tolerated(0.11)	0/1	87,44	0.352	131
17	synonymous SNV	ENSCAFG00000019514.4:ENSCAFT00000086331.1:exon27:c.C3993T:p.S1331S,ENSCAFG00000019514.4:ENSCAFT00000061515.1:exon28:c.C4389T:p.S1463S,ENSCAFG00000019514.4:ENSCAFT00000031020.4:exon29:c.C4497T:p.S1499S,ENSCAFG00000019514.4:ENSCAFT00000085203.1:exon28:c.C4143T:p.S1381S,ENSCAFG00000019514.4:ENSCAFT00000083587.1:exon26:c.C3732T:p.S1244S,ENSCAFG00000019514.4:ENSCAFT00000090091.1:exon27:c.C4017T:p.S133…	ENSCAFG00000019514	NPHP4	NPHP4	chr5	59820361	59820361	G	A	-	0/1	94,55	0.385	149
17	synonymous SNV	ENSCAFG00000019974.4:ENSCAFT00000031787.4:exon9:c.C1191T:p.F397F,ENSCAFG00000019974.4:ENSCAFT00000071199.1:exon8:c.C1116T:p.F372F,ENSCAFG00000019974.4:ENSCAFT00000082321.1:exon8:c.C1119T:p.F373F,ENSCAFG00000019974.4:ENSCAFT00000067071.1:exon9:c.C1233T:p.F411F,ENSCAFG00000019974.4:ENSCAFT00000063788.1:exon9:c.C1194T:p.F398F,ENSCAFG00000019974.4:ENSCAFT00000072521.1:exon9:c.C1218T:p.F406F,	ENSCAFG00000019974	CDH13	CDH13	chr5	68593305	68593305	G	A	-	0/1	127,91	0.44	218
17	nonsynonymous SNV	ENSCAFG00000032449.2:ENSCAFT00000044505.2:exon3:c.C1265T:p.A422V,	ENSCAFG00000032449	MARVELD3	MARVELD3	chr5	77420138	77420138	C	T	tolerated(0.51)	0/1	76,4	0.049	80
17	nonsynonymous SNV	ENSCAFG00000018177.4:ENSCAFT00000065082.1:exon12:c.C2413T:p.P805S,ENSCAFG00000018177.4:ENSCAFT00000028873.4:exon10:c.C2359T:p.P787S,	ENSCAFG00000018177	XYLT1	XYLT1	chr6	26749072	26749072	G	A	deleterious(0.03)	0/1	169,5	0.032	174
17	frameshift insertion	ENSCAFG00000019789.4:ENSCAFT00000043159.2:exon1:c.950dupC:p.P317fs,	ENSCAFG00000019789	RBM15	RBM15	chr6	41652092	41652092	-	G	-	0/1	26,23	0.495	49
17	nonsynonymous SNV	ENSCAFG00000029474.2:ENSCAFT00000087924.1:exon2:c.G83A:p.S28N,ENSCAFG00000029474.2:ENSCAFT00000063186.1:exon2:c.G329A:p.S110N,	ENSCAFG00000029474	GADD45A	GADD45A	chr6	77396021	77396021	C	T	tolerated(0.51)	0/1	23,20	0.448	43
17	nonsynonymous SNV	ENSCAFG00000030784.2:ENSCAFT00000079942.1:exon3:c.C884T:p.S295L,ENSCAFG00000030784.2:ENSCAFT00000085112.1:exon3:c.C926T:p.S309L,ENSCAFG00000030784.2:ENSCAFT00000088833.1:exon3:c.C863T:p.S288L,ENSCAFG00000030784.2:ENSCAFT00000079383.1:exon3:c.C953T:p.S318L,ENSCAFG00000030784.2:ENSCAFT00000093715.1:exon3:c.C854T:p.S285L,ENSCAFG00000030784.2:ENSCAFT00000078912.1:exon3:c.C902T:p.S301L,ENSCAFG00000030…	ENSCAFG00000030784	LAD1	LAD1	chr7	1628717	1628717	G	A	tolerated(0.16)	0/1	12,8	0.47	20
17	frameshift deletion	ENSCAFG00000011082.5:ENSCAFT00000072206.1:exon12:c.2670_2671del:p.S890fs,ENSCAFG00000011082.5:ENSCAFT00000044868.3:exon11:c.2358_2359del:p.S786fs,ENSCAFG00000011082.5:ENSCAFT00000077962.1:exon11:c.2508_2509del:p.S836fs,ENSCAFG00000011082.5:ENSCAFT00000017652.3:exon12:c.2391_2392del:p.S797fs,ENSCAFG00000011082.5:ENSCAFT00000061723.1:exon9:c.2391_2392del:p.S797fs,ENSCAFG00000011082.5:ENSCAFT0000008…	ENSCAFG00000011082	CAMSAP2	CAMSAP2	chr7	2329359	2329360	AT	-	-	0/1	88,47	0.327	135
17	synonymous SNV	ENSCAFG00000011459.5:ENSCAFT00000018180.4:exon5:c.C447T:p.F149F,	ENSCAFG00000011459	IL2-	IL2-	chr7	6021467	6021467	C	T	-	0/1	101,41	0.3	142
17	nonsynonymous SNV	ENSCAFG00000018254.6:ENSCAFT00000047396.3:exon14:c.C2008T:p.H670Y,ENSCAFG00000018254.6:ENSCAFT00000028994.5:exon15:c.C2335T:p.H779Y,	ENSCAFG00000018254	GREB1L	GREB1L	chr7	66549405	66549405	G	A	deleterious(0)	0/1	67,42	0.42	109
17	synonymous SNV	ENSCAFG00000014164.4:ENSCAFT00000022485.4:exon4:c.T771A:p.I257I,	ENSCAFG00000014164	MDGA2	MDGA2	chr8	24129501	24129501	A	T	-	0/1	60,23	0.302	83
17	nonsynonymous SNV	ENSCAFG00000016879.3:ENSCAFT00000026731.3:exon3:c.G521A:p.R174Q,	ENSCAFG00000016879	FAM161B	FAM161B	chr8	47173171	47173171	C	T	tolerated(1)	0/1	66,36	0.343	102
17	frameshift deletion	ENSCAFG00000030258.3:ENSCAFT00000089605.1:exon1:c.300_301del:p.V100fs,	ENSCAFG00000030258	-	IGHG2	chr8	73037954	73037955	AC	-	-	0/1	27,106	0.792	133
17	nonsynonymous SNV	ENSCAFG00000005097.4:ENSCAFT00000093017.1:exon3:c.G646A:p.G216S,ENSCAFG00000005097.4:ENSCAFT00000063708.1:exon2:c.G283A:p.G95S,ENSCAFG00000005097.4:ENSCAFT00000063371.1:exon4:c.G367A:p.G123S,ENSCAFG00000005097.4:ENSCAFT00000008200.4:exon4:c.G367A:p.G123S,	ENSCAFG00000005097	RHBDF2	RHBDF2	chr9	4231007	4231007	G	A	deleterious(0)	0/1	29,12	0.3	41
17	nonsynonymous SNV	ENSCAFG00000012934.4:ENSCAFT00000038012.3:exon7:c.G572A:p.R191H,	ENSCAFG00000012934	MAP3K3	MAP3K3	chr9	11665214	11665214	G	A	deleterious(0.04)	0/1	79,50	0.384	129
17	synonymous SNV	ENSCAFG00000011099.4:ENSCAFT00000078899.1:exon2:c.T450C:p.I150I,ENSCAFG00000011099.4:ENSCAFT00000017663.4:exon2:c.T450C:p.I150I,	ENSCAFG00000011099	AMZ2	AMZ2	chr9	14998791	14998791	T	C	-	0/1	55,6	0.087	61
17	synonymous SNV	ENSCAFG00000019464.4:ENSCAFT00000030951.4:exon4:c.C600A:p.R200R,	ENSCAFG00000019464	SLC34A3	SLC34A3	chr9	48438175	48438175	G	T	-	0/1	42,22	0.335	64
17	nonsynonymous SNV	ENSCAFG00000019920.4:ENSCAFT00000031698.4:exon20:c.G2684A:p.G895D,	ENSCAFG00000019920	NUP214	NUP214	chr9	52912156	52912156	C	T	deleterious(0.05)	0/1	105,10	0.101	115
17	stopgain	ENSCAFG00000014589.6:ENSCAFT00000023217.4:exon12:c.G1065A:p.W355X,ENSCAFG00000014589.6:ENSCAFT00000074698.1:exon12:c.G1065A:p.W355X,ENSCAFG00000014589.6:ENSCAFT00000093247.1:exon12:c.G1065A:p.W355X,ENSCAFG00000014589.6:ENSCAFT00000068439.1:exon11:c.G1032A:p.W344X,ENSCAFG00000014589.6:ENSCAFT00000073366.1:exon12:c.G1065A:p.W355X,ENSCAFG00000014589.6:ENSCAFT00000061253.1:exon12:c.G1065A:p.W355X,ENS…	ENSCAFG00000014589	KDM6A	KDM6A	chrX	38905991	38905991	G	A	-	0/1	81,8	0.109	89
17	frameshift deletion	ENSCAFG00000016756.4:ENSCAFT00000026530.4:exon2:c.302delT:p.L101fs,ENSCAFG00000016756.4:ENSCAFT00000071997.1:exon2:c.134delT:p.L45fs,	ENSCAFG00000016756	IGBP1	IGBP1	chrX	54585550	54585550	T	-	-	0/1	49,33	0.42	82
18	synonymous SNV	ENSCAFG00000000583.1:ENSCAFT00000000897.1:exon1:c.C609T:p.P203P,	ENSCAFG00000000583	CLDN2-	CLDN2-	chr1	45018703	45018703	C	T	-	0/1	85,10	0.139	95
18	nonsynonymous SNV	ENSCAFG00000004958.4:ENSCAFT00000007987.4:exon17:c.T2563C:p.F855L,ENSCAFG00000004958.4:ENSCAFT00000092506.1:exon19:c.T3682C:p.F1228L,	ENSCAFG00000004958	ATP1A3	ATP1A3	chr1	112343999	112343999	T	C	tolerated(0.21)	0/1	60,5	0.094	65
18	nonsynonymous SNV	ENSCAFG00000000681.5:ENSCAFT00000001089.5:exon30:c.C3812T:p.A1271V,ENSCAFG00000000681.5:ENSCAFT00000070313.1:exon29:c.C3713T:p.A1238V,	ENSCAFG00000000681	FBN2	FBN2	chr11	17371962	17371962	G	A	tolerated(0.08)	0/1	58,4	0.091	62
18	nonsynonymous SNV	ENSCAFG00000030654.2:ENSCAFT00000047031.2:exon3:c.C1264T:p.R422C,	ENSCAFG00000030654	CHSY3	CHSY3	chr11	18852786	18852786	C	T	deleterious(0)	0/1	84,17	0.179	101
18	nonsynonymous SNV	ENSCAFG00000000799.5:ENSCAFT00000061015.1:exon2:c.G215A:p.R72Q,ENSCAFG00000000799.5:ENSCAFT00000001273.4:exon2:c.G140A:p.R47Q,ENSCAFG00000000799.5:ENSCAFT00000043983.3:exon2:c.G215A:p.R72Q,ENSCAFG00000000799.5:ENSCAFT00000084460.1:exon2:c.G215A:p.R72Q,	ENSCAFG00000000799	ACSL6	AC-34228.3	chr11	20267558	20267558	C	T	deleterious(0.05)	0/1	44,5	0.135	49
18	synonymous SNV	ENSCAFG00000031992.2:ENSCAFT00000043740.2:exon6:c.T375C:p.A125A,	ENSCAFG00000031992	SAR1B	SAR1B	chr11	22719782	22719782	A	G	-	0/1	72,4	0.049	76
18	synonymous SNV	ENSCAFG00000002439.4:ENSCAFT00000003846.4:exon7:c.T879C:p.F293F,ENSCAFG00000002439.4:ENSCAFT00000082919.1:exon6:c.T753C:p.F251F,	ENSCAFG00000002439	TSTD2	TSTD2	chr11	54918669	54918669	A	G	-	0/1	41,10	0.195	51
18	nonsynonymous SNV	ENSCAFG00000001847.6:ENSCAFT00000045907.3:exon10:c.C3833T:p.S1278F,ENSCAFG00000001847.6:ENSCAFT00000002912.5:exon9:c.C3629T:p.S1210F,	ENSCAFG00000001847	ZNF318	ZNF318	chr12	11816443	11816443	G	A	-	0/1	93,29	0.229	122
18	nonsynonymous SNV	ENSCAFG00000002106.4:ENSCAFT00000003327.4:exon2:c.G815A:p.G272D,	ENSCAFG00000002106	-	-	chr12	16857036	16857036	G	A	deleterious(0)	0/1	158,34	0.188	192
18	nonsynonymous SNV	ENSCAFG00000000934.4:ENSCAFT00000001452.4:exon15:c.C1843G:p.P615A,ENSCAFG00000000934.4:ENSCAFT00000073925.1:exon15:c.C1840G:p.P614A,	ENSCAFG00000000934	COL14A1	COL14A1	chr13	19120173	19120173	C	G	tolerated(0.62)	0|1	31,5	0.164	36
18	nonsynonymous SNV	ENSCAFG00000001268.3:ENSCAFT00000001957.3:exon1:c.A158C:p.N53T,	ENSCAFG00000001268	OR2T2	OR2T2	chr14	2663659	2663659	A	C	deleterious(0)	0/1	146,14	0.124	160
18	nonsynonymous SNV	ENSCAFG00000001651.5:ENSCAFT00000002605.5:exon1:c.G77T:p.G26V,	ENSCAFG00000001651	IMPDH1	IMPDH1	chr14	7996933	7996933	G	T	deleterious_low_confidence(0.01)	0/1	11,4	0.273	15
18	nonsynonymous SNV	ENSCAFG00000001754.4:ENSCAFT00000087472.1:exon3:c.C163T:p.P55S,ENSCAFG00000001754.4:ENSCAFT00000002746.4:exon7:c.C544T:p.P182S,ENSCAFG00000001754.4:ENSCAFT00000062245.1:exon7:c.C544T:p.P182S,ENSCAFG00000001754.4:ENSCAFT00000082826.1:exon4:c.C379T:p.P127S,ENSCAFG00000001754.4:ENSCAFT00000086242.1:exon3:c.C163T:p.P55S,	ENSCAFG00000001754	POT1	POT1	chr14	11014677	11014677	C	T	deleterious(0)	0/1	68,8	0.091	76
18	nonsynonymous SNV	ENSCAFG00000003539.4:ENSCAFT00000005678.4:exon11:c.A2165G:p.D722G,ENSCAFG00000003539.4:ENSCAFT00000090094.1:exon10:c.A1973G:p.D658G,	ENSCAFG00000003539	CLSPN	CLSPN	chr15	6418001	6418001	A	G	deleterious(0)	0/1	81,4	0.062	85
18	stopgain	ENSCAFG00000004294.5:ENSCAFT00000006914.5:exon18:c.G1603T:p.E535X,	ENSCAFG00000004294	POMGNT1	POMGNT1	chr15	14185961	14185961	G	T	-	0/1	37,6	0.138	43
18	nonsynonymous SNV	ENSCAFG00000003503.4:ENSCAFT00000072787.1:exon3:c.C1511T:p.A504V,ENSCAFG00000003503.4:ENSCAFT00000080746.1:exon2:c.C1511T:p.A504V,ENSCAFG00000003503.4:ENSCAFT00000005632.4:exon3:c.C1511T:p.A504V,	ENSCAFG00000003503	ARHGEF5	ARHGEF5	chr16	5665319	5665319	G	A	deleterious(0.02)	0/1	60,4	0.074	64
18	synonymous SNV	ENSCAFG00000004075.5:ENSCAFT00000085088.1:exon11:c.G1386A:p.L462L,ENSCAFG00000004075.5:ENSCAFT00000044550.2:exon9:c.G1839A:p.L613L,ENSCAFG00000004075.5:ENSCAFT00000069850.1:exon9:c.G1839A:p.L613L,ENSCAFG00000004075.5:ENSCAFT00000006536.5:exon9:c.G1839A:p.L613L,	ENSCAFG00000004075	NCOA1	NCOA1	chr17	19068659	19068659	G	A	-	0/1	72,4	0.064	76
18	synonymous SNV	ENSCAFG00000031118.2:ENSCAFT00000045348.2:exon3:c.T444C:p.G148G,	ENSCAFG00000031118	-	-	chr17	36713392	36713392	A	G	-	0/1	54,8	0.146	62
18	stopgain	ENSCAFG00000008486.4:ENSCAFT00000013486.3:exon4:c.C434G:p.S145X,ENSCAFG00000008486.4:ENSCAFT00000063065.1:exon5:c.C536G:p.S179X,	ENSCAFG00000008486	WBP1	WBP1	chr17	48671618	48671618	G	C	-	0/1	78,3	0.066	81
18	nonsynonymous SNV	ENSCAFG00000025333.3:ENSCAFT00000072679.1:exon13:c.A1859G:p.E620G,ENSCAFG00000025333.3:ENSCAFT00000039288.3:exon12:c.A1745G:p.E582G,ENSCAFG00000025333.3:ENSCAFT00000063391.1:exon13:c.A1859G:p.E620G,ENSCAFG00000025333.3:ENSCAFT00000048150.2:exon13:c.A1859G:p.E620G,ENSCAFG00000025333.3:ENSCAFT00000067461.1:exon12:c.A1781G:p.E594G,	ENSCAFG00000025333	PTPN12	PTPN12	chr18	17683159	17683159	A	G	deleterious(0.01)	0/1	56,4	0.08	60
18	nonsynonymous SNV	ENSCAFG00000006381.4:ENSCAFT00000010317.4:exon10:c.C1061T:p.A354V,ENSCAFG00000006381.4:ENSCAFT00000068958.1:exon10:c.C968T:p.A323V,	ENSCAFG00000006381	SEMA3C	SEMA3C	chr18	20523253	20523253	G	A	deleterious(0)	0/1	51,5	0.102	56
18	nonsynonymous SNV	ENSCAFG00000007822.5:ENSCAFT00000012510.4:exon17:c.A3640G:p.R1214G,	ENSCAFG00000007822	BDP1	BDP1	chr2	54693475	54693475	A	G	tolerated(0.43)	0/1	34,3	0.099	37
18	nonsynonymous SNV	ENSCAFG00000016575.4:ENSCAFT00000087557.1:exon1:c.G13A:p.G5S,ENSCAFG00000016575.4:ENSCAFT00000026251.4:exon1:c.G13A:p.G5S,	ENSCAFG00000016575	DRAXIN	DRAXIN	chr2	84525770	84525770	C	T	tolerated_low_confidence(0.6)	0/1	6,4	0.333	10
18	nonsynonymous SNV	ENSCAFG00000005033.4:ENSCAFT00000008101.3:exon3:c.G149A:p.R50H,	ENSCAFG00000005033	SLC6A1	SLC6A1	chr20	7359461	7359461	C	T	deleterious(0.03)	0/1	128,5	0.049	133
18	stopgain	ENSCAFG00000013392.4:ENSCAFT00000060515.1:exon3:c.T2039A:p.L680X,ENSCAFG00000013392.4:ENSCAFT00000021260.4:exon3:c.T2039A:p.L680X,ENSCAFG00000013392.4:ENSCAFT00000064752.1:exon3:c.T2039A:p.L680X,ENSCAFG00000013392.4:ENSCAFT00000072365.1:exon3:c.T2039A:p.L680X,ENSCAFG00000013392.4:ENSCAFT00000077709.1:exon3:c.T2039A:p.L680X,ENSCAFG00000013392.4:ENSCAFT00000071377.1:exon3:c.T2039A:p.L680X,ENSCAFG00…	ENSCAFG00000013392	SETD2	SETD2	chr20	41711749	41711749	T	A	-	0/1	59,11	0.179	70
18	nonsynonymous SNV	ENSCAFG00000013392.4:ENSCAFT00000021260.4:exon20:c.C7522T:p.R2508C,ENSCAFG00000013392.4:ENSCAFT00000077709.1:exon20:c.C7522T:p.R2508C,ENSCAFG00000013392.4:ENSCAFT00000071377.1:exon19:c.C7387T:p.R2463C,	ENSCAFG00000013392	SETD2	SETD2	chr20	41799527	41799527	C	T	deleterious(0)	0/1	63,13	0.159	76
18	nonsynonymous SNV	ENSCAFG00000003978.4:ENSCAFT00000006379.4:exon2:c.A1187G:p.E396G,	ENSCAFG00000003978	PGR	PGR	chr21	448506	448506	A	G	tolerated_low_confidence(0.16)	0/1	12,3	0.231	15
18	synonymous SNV	ENSCAFG00000005628.4:ENSCAFT00000009051.4:exon1:c.C186T:p.A62A,	ENSCAFG00000005628	P2RY6	P2RY6	chr21	24930572	24930572	G	A	-	0/1	67,11	0.164	78
18	nonsynonymous SNV	ENSCAFG00000029611.1:ENSCAFT00000010146.2:exon1:c.G460T:p.V154L,	ENSCAFG00000029611	OR52H9	-	chr21	28714126	28714126	G	T	tolerated_low_confidence(0.06)	0/1	189,34	0.147	223
18	synonymous SNV	ENSCAFG00000008613.4:ENSCAFT00000013658.4:exon13:c.C1746T:p.G582G,	ENSCAFG00000008613	TROAP	TROAP	chr27	5283521	5283521	G	A	-	0/1	80,4	0.061	84
18	synonymous SNV	ENSCAFG00000009592.4:ENSCAFT00000015264.4:exon16:c.G1776A:p.P592P,ENSCAFG00000009592.4:ENSCAFT00000068994.1:exon15:c.G1629A:p.P543P,ENSCAFG00000009592.4:ENSCAFT00000060987.1:exon16:c.G1632A:p.P544P,ENSCAFG00000009592.4:ENSCAFT00000092257.1:exon15:c.G1629A:p.P543P,	ENSCAFG00000009592	NELL2	NELL2	chr27	9586254	9586254	G	A	-	0/1	40,6	0.158	46
18	synonymous SNV	ENSCAFG00000012538.4:ENSCAFT00000019918.4:exon3:c.C160A:p.R54R,ENSCAFG00000012538.4:ENSCAFT00000059531.1:exon3:c.C160A:p.R54R,	ENSCAFG00000012538	PLCZ1	PLCZ1	chr27	28376934	28376934	C	A	-	0/1	49,10	0.19	59
18	nonsynonymous SNV	ENSCAFG00000007076.5:ENSCAFT00000011340.5:exon18:c.A2869G:p.I957V,ENSCAFG00000007076.5:ENSCAFT00000050043.2:exon17:c.A2902G:p.I968V,ENSCAFG00000007076.5:ENSCAFT00000084819.1:exon18:c.A3010G:p.I1004V,ENSCAFG00000007076.5:ENSCAFT00000076240.1:exon17:c.A2884G:p.I962V,ENSCAFG00000007076.5:ENSCAFT00000081402.1:exon18:c.A3259G:p.I1087V,	ENSCAFG00000007076	RET	RET	chr28	3951231	3951231	T	C	deleterious(0)	0|1	65,4	0.074	69
18	synonymous SNV	ENSCAFG00000007076.5:ENSCAFT00000011340.5:exon18:c.C2868T:p.D956D,ENSCAFG00000007076.5:ENSCAFT00000050043.2:exon17:c.C2901T:p.D967D,ENSCAFG00000007076.5:ENSCAFT00000084819.1:exon18:c.C3009T:p.D1003D,ENSCAFG00000007076.5:ENSCAFT00000076240.1:exon17:c.C2883T:p.D961D,ENSCAFG00000007076.5:ENSCAFT00000081402.1:exon18:c.C3258T:p.D1086D,	ENSCAFG00000007076	RET	RET	chr28	3951232	3951232	G	A	-	0|1	65,4	0.074	69
18	nonsynonymous SNV	ENSCAFG00000012561.5:ENSCAFT00000091564.1:exon24:c.A2912T:p.H971L,ENSCAFG00000012561.5:ENSCAFT00000019984.5:exon25:c.A2942T:p.H981L,ENSCAFG00000012561.5:ENSCAFT00000019948.5:exon26:c.A3266T:p.H1089L,ENSCAFG00000012561.5:ENSCAFT00000090693.1:exon26:c.A3266T:p.H1089L,ENSCAFG00000012561.5:ENSCAFT00000019961.4:exon24:c.A2912T:p.H971L,	ENSCAFG00000012561	DMBT1	DMBT1	chr28	32273785	32273785	A	T	deleterious(0.01)	0/1	177,32	0.154	209
18	nonsynonymous SNV	ENSCAFG00000006598.4:ENSCAFT00000067077.1:exon9:c.G1189A:p.D397N,ENSCAFG00000006598.4:ENSCAFT00000089452.1:exon11:c.G1531A:p.D511N,ENSCAFG00000006598.4:ENSCAFT00000010664.4:exon11:c.G1531A:p.D511N,	ENSCAFG00000006598	MCM4	MCM4	chr29	255363	255363	G	A	deleterious(0)	0/1	76,11	0.154	87
18	nonsynonymous SNV	ENSCAFG00000008634.5:ENSCAFT00000013700.5:exon18:c.T2755C:p.S919P,ENSCAFG00000008634.5:ENSCAFT00000013696.5:exon18:c.T2755C:p.S919P,ENSCAFG00000008634.5:ENSCAFT00000044386.2:exon19:c.T2620C:p.S874P,	ENSCAFG00000008634	CCDC158	CCDC158	chr32	969047	969047	A	G	tolerated(0.18)	0/1	107,35	0.252	142
18	nonsynonymous SNV	ENSCAFG00000009247.5:ENSCAFT00000014761.4:exon19:c.C3518T:p.T1173I,ENSCAFG00000009247.5:ENSCAFT00000071436.1:exon18:c.C3356T:p.T1119I,ENSCAFG00000009247.5:ENSCAFT00000071781.1:exon18:c.C3434T:p.T1145I,ENSCAFG00000009247.5:ENSCAFT00000065696.1:exon19:c.C3518T:p.T1173I,ENSCAFG00000009247.5:ENSCAFT00000074071.1:exon20:c.C3458T:p.T1153I,ENSCAFG00000009247.5:ENSCAFT00000060833.1:exon18:c.C3464T:p.T115…	ENSCAFG00000009247	WDFY3	WDFY3	chr32	8546027	8546027	G	A	tolerated(0.12)	0/1	54,12	0.232	66
18	nonsynonymous SNV	ENSCAFG00000012608.4:ENSCAFT00000020103.4:exon19:c.G2314A:p.G772R,	ENSCAFG00000012608	PSMD2	PSMD2	chr34	17188162	17188162	G	A	deleterious(0)	0/1	60,6	0.082	66
18	nonsynonymous SNV	ENSCAFG00000028566.2:ENSCAFT00000048012.2:exon4:c.G418A:p.V140M,	ENSCAFG00000028566	NRSN1	NRSN1	chr35	22236075	22236075	G	A	tolerated(0.07)	0/1	137,7	0.053	144
18	nonsynonymous SNV	ENSCAFG00000012078.5:ENSCAFT00000049483.3:exon4:c.G1363A:p.A455T,	ENSCAFG00000012078	ZNF311	ZNF311	chr35	25979651	25979651	C	T	tolerated(1)	0/1	26,9	0.321	35
18	nonsynonymous SNV	ENSCAFG00000023815.3:ENSCAFT00000019250.4:exon6:c.T1153C:p.F385L,	ENSCAFG00000023815	-	ZFP57	chr35	26267607	26267607	A	G	tolerated(0.06)	0/1	77,4	0.058	81
18	nonsynonymous SNV	ENSCAFG00000011706.4:ENSCAFT00000085352.1:exon5:c.G889A:p.V297M,ENSCAFG00000011706.4:ENSCAFT00000018594.4:exon4:c.G1087A:p.V363M,	ENSCAFG00000011706	MNDA	MNDA	chr38	22925932	22925932	C	T	tolerated(0.16)	0/1	181,23	0.113	204
18	nonsynonymous SNV	ENSCAFG00000013761.5:ENSCAFT00000021848.5:exon23:c.A3263G:p.K1088R,ENSCAFG00000013761.5:ENSCAFT00000060451.1:exon21:c.A3185G:p.K1062R,ENSCAFG00000013761.5:ENSCAFT00000093473.1:exon22:c.A3218G:p.K1073R,ENSCAFG00000013761.5:ENSCAFT00000074666.1:exon22:c.A3230G:p.K1077R,	ENSCAFG00000013761	CCAR1	CCAR1	chr4	19975315	19975315	A	G	tolerated(0.17)	0/1	25,4	0.136	29
18	nonsynonymous SNV	ENSCAFG00000014888.4:ENSCAFT00000023633.4:exon1:c.C1070T:p.P357L,	ENSCAFG00000014888	DDI1	DDI1	chr5	27976680	27976680	G	A	tolerated(0.37)	0/1	77,22	0.218	99
18	nonsynonymous SNV	ENSCAFG00000015751.4:ENSCAFT00000024965.4:exon14:c.G2132A:p.S711N,ENSCAFG00000015751.4:ENSCAFT00000061830.1:exon12:c.G1613A:p.S538N,	ENSCAFG00000015751	GRID2IP	GRID2IP	chr6	11841602	11841602	C	T	deleterious(0.01)	0/1	25,4	0.143	29
18	nonsynonymous SNV	ENSCAFG00000016526.4:ENSCAFT00000092422.1:exon36:c.T5018C:p.I1673T,ENSCAFG00000016526.4:ENSCAFT00000062306.1:exon35:c.T4994C:p.I1665T,ENSCAFG00000016526.4:ENSCAFT00000077066.1:exon36:c.T5174C:p.I1725T,ENSCAFG00000016526.4:ENSCAFT00000067612.1:exon35:c.T4676C:p.I1559T,ENSCAFG00000016526.4:ENSCAFT00000026189.4:exon36:c.T5099C:p.I1700T,	ENSCAFG00000016526	INTS1	INTS1	chr6	15476920	15476920	T	C	tolerated(0.17)	0/1	83,13	0.162	96
18	nonsynonymous SNV	ENSCAFG00000030295.2:ENSCAFT00000045914.2:exon1:c.A1666T:p.S556C,	ENSCAFG00000030295	-	-	chr6	37890133	37890133	T	A	tolerated(0.3)	0/1	288,5	0.022	293
18	synonymous SNV	ENSCAFG00000019343.4:ENSCAFT00000084427.1:exon6:c.G2043A:p.E681E,ENSCAFG00000019343.4:ENSCAFT00000030733.4:exon7:c.G2043A:p.E681E,ENSCAFG00000019343.4:ENSCAFT00000082599.1:exon6:c.G2043A:p.E681E,	ENSCAFG00000019343	FLYWCH1	FLYWCH1	chr6	38229627	38229627	C	T	-	0/1	66,4	0.069	70
18	nonsynonymous SNV	ENSCAFG00000012176.5:ENSCAFT00000019428.5:exon14:c.A1870G:p.R624G,ENSCAFG00000012176.5:ENSCAFT00000080202.1:exon14:c.A1870G:p.R624G,ENSCAFG00000012176.5:ENSCAFT00000070309.1:exon13:c.A1723G:p.R575G,	ENSCAFG00000012176	INTS7	INTS7	chr7	10258282	10258282	T	C	deleterious(0)	0/1	79,7	0.083	86
18	nonsynonymous SNV	ENSCAFG00000011993.4:ENSCAFT00000065570.1:exon2:c.A208C:p.T70P,ENSCAFG00000011993.4:ENSCAFT00000070985.1:exon2:c.A208C:p.T70P,ENSCAFG00000011993.4:ENSCAFT00000066810.1:exon2:c.A208C:p.T70P,ENSCAFG00000011993.4:ENSCAFT00000019055.4:exon2:c.A208C:p.T70P,	ENSCAFG00000011993	-	RNF31	chr8	4142054	4142054	A	C	tolerated(0.14)	0/1	132,37	0.208	169
18	nonsynonymous SNV	ENSCAFG00000015556.5:ENSCAFT00000024656.5:exon1:c.C305T:p.S102F,ENSCAFG00000015564.4:ENSCAFT00000091488.1:exon1:c.G275A:p.G92E,	ENSCAFG00000015556	L3HYPDH	L3HYPDH	chr8	34699895	34699895	G	A	-	0/1	30,10	0.24	40
18	synonymous SNV	ENSCAFG00000015592.4:ENSCAFT00000065321.1:exon10:c.A3438G:p.Q1146Q,	ENSCAFG00000015592	PCNX4	PCNX4	chr8	35247486	35247486	A	G	-	0/1	86,18	0.185	104
18	nonsynonymous SNV	ENSCAFG00000017612.5:ENSCAFT00000027927.5:exon4:c.C406T:p.P136S,	ENSCAFG00000017612	ASB2	ASB2	chr8	63027730	63027730	G	A	tolerated(0.06)	0/1	68,4	0.058	72
18	nonsynonymous SNV	ENSCAFG00000031259.2:ENSCAFT00000089227.1:exon2:c.G29A:p.R10H,ENSCAFG00000031259.2:ENSCAFT00000050213.2:exon2:c.G29A:p.R10H,	ENSCAFG00000031259	-	-	chr8	70071372	70071372	C	T	deleterious(0.05)	0/1	18,3	0.187	21
18	nonsynonymous SNV	ENSCAFG00000030258.3:ENSCAFT00000029354.4:exon4:c.A371G:p.N124S,ENSCAFG00000030258.3:ENSCAFT00000064428.1:exon4:c.A356G:p.N119S,	ENSCAFG00000030258	-	IGHG2	chr8	72990164	72990164	T	C	tolerated(0.41)	0/1	24,7	0.231	31
18	nonsynonymous SNV	ENSCAFG00000046771.1:ENSCAFT00000077325.1:exon2:c.C527T:p.P176L,	ENSCAFG00000046771	-	IGHV4-4	chr8	73028236	73028236	G	A	deleterious_low_confidence(0.02)	0/1	76,7	0.101	83
18	nonsynonymous SNV	ENSCAFG00000013774.4:ENSCAFT00000075933.1:exon1:c.T239A:p.I80N,ENSCAFG00000013774.4:ENSCAFT00000021854.4:exon1:c.T239A:p.I80N,ENSCAFG00000013774.4:ENSCAFT00000088008.1:exon1:c.T239A:p.I80N,	ENSCAFG00000013774	MAP3K14	MAP3K14	chr9	18280456	18280456	T	A	deleterious(0)	0|1	44,16	0.283	60
18	nonsynonymous SNV	ENSCAFG00000013774.4:ENSCAFT00000075933.1:exon1:c.A241C:p.I81L,ENSCAFG00000013774.4:ENSCAFT00000021854.4:exon1:c.A241C:p.I81L,ENSCAFG00000013774.4:ENSCAFT00000088008.1:exon1:c.A241C:p.I81L,	ENSCAFG00000013774	MAP3K14	MAP3K14	chr9	18280458	18280458	A	C	deleterious(0)	0|1	44,16	0.283	60
18	nonsynonymous SNV	ENSCAFG00000018763.5:ENSCAFT00000083625.1:exon8:c.C977T:p.A326V,ENSCAFG00000018763.5:ENSCAFT00000029797.5:exon8:c.C977T:p.A326V,ENSCAFG00000018763.5:ENSCAFT00000078378.1:exon8:c.C977T:p.A326V,	ENSCAFG00000018763	SUPT6H	SUPT6H	chr9	42875264	42875264	C	T	tolerated(0.18)	0/1	19,4	0.166	23
18	synonymous SNV	ENSCAFG00000019980.4:ENSCAFT00000031796.4:exon2:c.G408A:p.L136L,	ENSCAFG00000019980	TOR1A	TOR1A	chr9	54018774	54018774	G	A	-	0/1	88,4	0.058	92
18	nonsynonymous SNV	ENSCAFG00000015681.5:ENSCAFT00000024814.4:exon2:c.G52A:p.G18S,ENSCAFG00000015681.5:ENSCAFT00000092496.1:exon5:c.G1201A:p.G401S,	ENSCAFG00000015681	SLC35A2	SLC35A2	chrX	42055573	42055573	C	T	deleterious(0)	0/1	70,5	0.075	75
18	nonsynonymous SNV	ENSCAFG00000017406.4:ENSCAFT00000027591.4:exon6:c.T725C:p.I242T,ENSCAFG00000017406.4:ENSCAFT00000080116.1:exon7:c.T746C:p.I249T,	ENSCAFG00000017406	CHM	CHM	chrX	66775299	66775299	A	G	deleterious(0)	0/1	34,5	0.151	39
18	nonsynonymous SNV	ENSCAFG00000017771.5:ENSCAFT00000028181.5:exon4:c.A440T:p.K147M,	ENSCAFG00000017771	-	TCP11X2	chrX	76079506	76079506	T	A	tolerated(0.38)	0/1	42,8	0.167	50
18	nonsynonymous SNV	ENSCAFG00000024861.3:ENSCAFT00000024577.4:exon2:c.G544A:p.G182R,	ENSCAFG00000024861	-	-	chrX	87522543	87522543	G	A	tolerated(0.09)	0/1	87,31	0.271	118
18	nonsynonymous SNV	ENSCAFG00000032238.2:ENSCAFT00000047057.2:exon1:c.G44A:p.G15D,	ENSCAFG00000032238	-	-	chrUn_JH373553	13669	13669	G	A	-	0/1	92,4	0.058	96
19	nonsynonymous SNV	ENSCAFG00000000049.3:ENSCAFT00000000070.3:exon4:c.G1379A:p.R460H,	ENSCAFG00000000049	-	RAP1GDS1	chr10	29797	29797	C	T	tolerated(0.16)	0/1	58,5	0.08	63
19	nonsynonymous SNV	ENSCAFG00000000767.5:ENSCAFT00000048271.2:exon19:c.G5921A:p.R1974H,	ENSCAFG00000000767	CELSR1	CELSR1	chr10	19815942	19815942	G	A	tolerated(0.29)	0/1	30,16	0.4	46
19	nonsynonymous SNV	ENSCAFG00000002138.4:ENSCAFT00000061008.1:exon6:c.C1253T:p.A418V,ENSCAFG00000002138.4:ENSCAFT00000003368.4:exon7:c.C716T:p.A239V,	ENSCAFG00000002138	IL18R1	IL18R1	chr10	40628939	40628939	G	A	tolerated(0.13)	0/1	79,45	0.365	124
19	nonsynonymous SNV	ENSCAFG00000001355.5:ENSCAFT00000070504.1:exon9:c.G5038A:p.V1680I,ENSCAFG00000001355.5:ENSCAFT00000002100.3:exon8:c.G5224A:p.V1742I,ENSCAFG00000001355.5:ENSCAFT00000047102.3:exon7:c.G5023A:p.V1675I,ENSCAFG00000001355.5:ENSCAFT00000043130.3:exon7:c.G5134A:p.V1712I,	ENSCAFG00000001355	KIAA2-26	KIAA2-26	chr11	26928529	26928529	C	T	tolerated(0.71)	0/1	98,35	0.281	133
19	nonsynonymous SNV	ENSCAFG00000001997.4:ENSCAFT00000003159.4:exon13:c.A1813G:p.I605V,	ENSCAFG00000001997	CWH43	CWH43	chr13	44771492	44771492	A	G	deleterious(0.05)	0/1	82,4	0.044	86
19	synonymous SNV	ENSCAFG00000029376.2:ENSCAFT00000045838.2:exon1:c.C201T:p.N67N,ENSCAFG00000029376.2:ENSCAFT00000039254.3:exon1:c.C201T:p.N67N,	ENSCAFG00000029376	-	-	chr13	58932258	58932258	G	A	-	0/1	144,106	0.436	250
19	nonsynonymous SNV	ENSCAFG00000001870.4:ENSCAFT00000002959.4:exon1:c.T424G:p.S142A,	ENSCAFG00000001870	STEAP2	STEAP2	chr14	16119496	16119496	T	G	-	0/1	27,5	0.23	32
19	nonsynonymous SNV	ENSCAFG00000030403.2:ENSCAFT00000044772.2:exon2:c.C523A:p.L175I,	ENSCAFG00000030403	LRAT	LRAT	chr15	52401643	52401643	C	A	tolerated(0.19)	0/1	56,41	0.437	97
19	nonsynonymous SNV	ENSCAFG00000005081.4:ENSCAFT00000059608.1:exon2:c.C310G:p.Q104E,ENSCAFG00000005081.4:ENSCAFT00000008171.4:exon1:c.C310G:p.Q104E,	ENSCAFG00000005081	INSIG1	INSIG1	chr16	18261394	18261394	C	G	deleterious(0.05)	0|1	18,15	0.478	33
19	nonsynonymous SNV	ENSCAFG00000005081.4:ENSCAFT00000059608.1:exon2:c.C313T:p.R105W,ENSCAFG00000005081.4:ENSCAFT00000008171.4:exon1:c.C313T:p.R105W,	ENSCAFG00000005081	INSIG1	INSIG1	chr16	18261397	18261397	C	T	deleterious(0)	0|1	18,14	0.455	32
19	nonsynonymous SNV	ENSCAFG00000008686.5:ENSCAFT00000013885.4:exon40:c.T6064C:p.S2022P,	ENSCAFG00000008686	CSMD1	CSMD1	chr16	55307904	55307904	A	G	tolerated(0.54)	0/1	55,33	0.364	88
19	nonsynonymous SNV	ENSCAFG00000012605.5:ENSCAFT00000020030.4:exon1:c.C827A:p.P276H,ENSCAFG00000012605.5:ENSCAFT00000044221.3:exon1:c.C827A:p.P276H,ENSCAFG00000012605.5:ENSCAFT00000081047.1:exon1:c.C827A:p.P276H,	ENSCAFG00000012605	ZNF687	ZNF687	chr17	60354690	60354690	C	A	deleterious(0)	0/1	64,63	0.465	127
19	nonsynonymous SNV	ENSCAFG00000012719.5:ENSCAFT00000020169.5:exon17:c.A2900G:p.E967G,ENSCAFG00000012719.5:ENSCAFT00000046033.3:exon19:c.A3593G:p.E1198G,	ENSCAFG00000012719	POGZ	POGZ	chr17	60467727	60467727	T	C	tolerated(0.07)	1|0	103,41	0.343	144
19	synonymous SNV	ENSCAFG00000008769.5:ENSCAFT00000013989.4:exon14:c.C1821T:p.S607S,	ENSCAFG00000008769	MYBPC3	MYBPC3	chr18	42280231	42280231	C	T	-	0/1	28,19	0.447	47
19	nonsynonymous SNV	ENSCAFG00000012682.5:ENSCAFT00000043031.3:exon7:c.C920T:p.A307V,ENSCAFG00000012682.5:ENSCAFT00000020134.4:exon6:c.C848T:p.A283V,	ENSCAFG00000012682	PELI3	PELI3	chr18	50873093	50873093	G	A	deleterious(0.02)	0/1	20,4	0.143	24
19	nonsynonymous SNV	ENSCAFG00000008680.4:ENSCAFT00000013773.4:exon15:c.C2240T:p.A747V,ENSCAFG00000008680.4:ENSCAFT00000086921.1:exon14:c.C2045T:p.A682V,	ENSCAFG00000008680	DRC7	DRC7	chr2	58759863	58759863	G	A	deleterious(0)	0/1	24,18	0.412	42
19	nonsynonymous SNV	ENSCAFG00000016142.3:ENSCAFT00000025610.3:exon3:c.C202T:p.R68W,	ENSCAFG00000016142	TMEM82	TMEM82	chr2	81858381	81858381	G	A	deleterious(0)	0/1	10,3	0.253	13
19	stopgain	ENSCAFG00000013392.4:ENSCAFT00000064752.1:exon6:c.C4786T:p.R1596X,ENSCAFG00000013392.4:ENSCAFT00000060515.1:exon6:c.C4786T:p.R1596X,ENSCAFG00000013392.4:ENSCAFT00000072365.1:exon6:c.C4786T:p.R1596X,ENSCAFG00000013392.4:ENSCAFT00000077709.1:exon6:c.C4786T:p.R1596X,ENSCAFG00000013392.4:ENSCAFT00000071377.1:exon6:c.C4786T:p.R1596X,ENSCAFG00000013392.4:ENSCAFT00000076367.1:exon6:c.C442T:p.R148X,ENSCA…	ENSCAFG00000013392	SETD2	SETD2	chr20	41721021	41721021	C	T	-	0/1	25,25	0.472	50
19	nonsynonymous SNV	ENSCAFG00000019393.5:ENSCAFT00000030835.5:exon2:c.C313T:p.R105W,	ENSCAFG00000019393	TMPRSS9	TMPRSS9	chr20	56685798	56685798	G	A	deleterious_low_confidence(0.02)	0/1	27,14	0.364	41
19	nonsynonymous SNV	ENSCAFG00000003978.4:ENSCAFT00000006379.4:exon1:c.G983A:p.R328H,	ENSCAFG00000003978	PGR	PGR	chr21	448301	448301	G	A	deleterious(0)	0/1	39,5	0.125	44
19	nonsynonymous SNV	ENSCAFG00000007049.4:ENSCAFT00000011306.4:exon2:c.G149A:p.G50E,	ENSCAFG00000007049	COX4I2	COX4I2	chr24	21123382	21123382	G	A	tolerated(0.08)	0/1	15,4	0.25	19
19	nonsynonymous SNV	ENSCAFG00000029278.2:ENSCAFT00000049386.2:exon2:c.G904T:p.D302Y,	ENSCAFG00000029278	SOX18	SOX18	chr24	47495567	47495567	C	A	deleterious_low_confidence(0)	0/1	14,4	0.286	18
19	synonymous SNV	ENSCAFG00000009303.4:ENSCAFT00000014796.4:exon10:c.G1401A:p.A467A,	ENSCAFG00000009303	FBXO21	FBXO21	chr26	13737929	13737929	C	T	-	0/1	54,4	0.088	58
19	nonsynonymous SNV	ENSCAFG00000008937.5:ENSCAFT00000014204.4:exon5:c.G788A:p.R263Q,	ENSCAFG00000008937	KANSL2	KANSL2	chr27	5832098	5832098	G	A	tolerated(0.06)	0/1	62,19	0.25	81
19	synonymous SNV	ENSCAFG00000009059.5:ENSCAFT00000014414.4:exon41:c.C2691T:p.T897T,	ENSCAFG00000009059	COL2A1	COL2A1	chr27	6781425	6781425	C	T	-	0|1	52,38	0.419	90
19	nonsynonymous SNV	ENSCAFG00000007620.4:ENSCAFT00000092664.1:exon28:c.C3442T:p.R1148C,ENSCAFG00000007620.4:ENSCAFT00000072125.1:exon27:c.C3280T:p.R1094C,ENSCAFG00000007620.4:ENSCAFT00000087340.1:exon27:c.C3337T:p.R1113C,ENSCAFG00000007620.4:ENSCAFT00000012231.4:exon28:c.C3442T:p.R1148C,	ENSCAFG00000007620	PREX2	PREX2	chr29	17634844	17634844	C	T	deleterious_low_confidence(0.02)	0/1	88,41	0.308	129
19	nonsynonymous SNV	ENSCAFG00000009472.4:ENSCAFT00000082219.1:exon1:c.C136T:p.L46F,ENSCAFG00000009472.4:ENSCAFT00000066206.1:exon1:c.C136T:p.L46F,ENSCAFG00000009472.4:ENSCAFT00000078161.1:exon1:c.C136T:p.L46F,ENSCAFG00000009472.4:ENSCAFT00000015054.4:exon1:c.C136T:p.L46F,	ENSCAFG00000009472	PTDSS1	PTDSS1	chr29	40768388	40768388	C	T	deleterious(0.01)	0/1	24,21	0.45	45
19	nonsynonymous SNV	ENSCAFG00000015664.4:ENSCAFT00000024813.4:exon1:c.G1807A:p.A603T,	ENSCAFG00000015664	DRD5	DRD5	chr3	69622087	69622087	C	T	deleterious_low_confidence(0.01)	0/1	156,51	0.273	207
19	nonsynonymous SNV	ENSCAFG00000010755.5:ENSCAFT00000043793.3:exon11:c.G1864A:p.A622T,ENSCAFG00000010755.5:ENSCAFT00000017106.4:exon10:c.G1825A:p.A609T,	ENSCAFG00000010755	CCDC191	CCDC191	chr33	18268433	18268433	C	T	tolerated(0.61)	0/1	84,6	0.064	90
19	nonsynonymous SNV	ENSCAFG00000009392.4:ENSCAFT00000014936.4:exon8:c.G1228A:p.A410T,	ENSCAFG00000009392	FAM217A	FAM217A	chr35	4316365	4316365	C	T	tolerated(0.11)	0/1	46,42	0.478	88
19	synonymous SNV	ENSCAFG00000011648.5:ENSCAFT00000018504.4:exon14:c.T1974C:p.C658C,	ENSCAFG00000011648	SCN7A	SCN7A	chr36	11507716	11507716	A	G	-	0/1	59,41	0.384	100
19	nonsynonymous SNV	ENSCAFG00000012128.4:ENSCAFT00000019396.4:exon69:c.C12782T:p.A4261V,	ENSCAFG00000012128	LRP2	LRP2	chr36	13926669	13926669	G	A	tolerated(0.63)	0/1	58,31	0.373	89
19	nonsynonymous SNV	ENSCAFG00000015161.5:ENSCAFT00000024095.4:exon11:c.T881G:p.F294C,ENSCAFG00000015161.5:ENSCAFT00000090054.1:exon10:c.T950G:p.F317C,ENSCAFG00000015161.5:ENSCAFT00000089308.1:exon10:c.T950G:p.F317C,ENSCAFG00000015161.5:ENSCAFT00000063345.1:exon10:c.T950G:p.F317C,ENSCAFG00000015161.5:ENSCAFT00000066793.1:exon10:c.T950G:p.F317C,ENSCAFG00000015161.5:ENSCAFT00000063569.1:exon10:c.T950G:p.F317C,ENSCAFG00…	ENSCAFG00000015161	CAMK2G	CAMK2G	chr4	24269520	24269520	A	C	deleterious_low_confidence(0)	0/1	7,46	0.805	53
19	nonsynonymous SNV	ENSCAFG00000017614.5:ENSCAFT00000044955.2:exon1:c.T103C:p.S35P,	ENSCAFG00000017614	GEMIN5	GEMIN5	chr4	54894938	54894938	T	C	tolerated(0.09)	0/1	66,4	0.061	70
19	nonsynonymous SNV	ENSCAFG00000018997.4:ENSCAFT00000030167.4:exon5:c.C476T:p.T159I,	ENSCAFG00000018997	LEXM	LEXM	chr5	54349421	54349421	G	A	deleterious(0)	0/1	30,30	0.488	60
19	nonsynonymous SNV	ENSCAFG00000020090.4:ENSCAFT00000085396.1:exon9:c.C1060T:p.R354C,ENSCAFG00000020090.4:ENSCAFT00000031975.4:exon8:c.C991T:p.R331C,	ENSCAFG00000020090	LDHD	LDHD	chr5	75589914	75589914	C	T	deleterious(0)	0/1	13,3	0.229	16
19	synonymous SNV	ENSCAFG00000019010.3:ENSCAFT00000030200.3:exon8:c.G714A:p.A238A,ENSCAFG00000019010.3:ENSCAFT00000085573.1:exon5:c.G426A:p.A142A,	ENSCAFG00000019010	PMM2	PMM2	chr6	33348312	33348312	C	T	-	0/1	78,44	0.355	122
19	synonymous SNV	ENSCAFG00000019190.4:ENSCAFT00000090446.1:exon16:c.C1956T:p.N652N,ENSCAFG00000019190.4:ENSCAFT00000089454.1:exon16:c.C1737T:p.N579N,ENSCAFG00000019190.4:ENSCAFT00000030469.4:exon16:c.C1953T:p.N651N,	ENSCAFG00000019190	ANKS3	ANKS3	chr6	36710634	36710634	C	T	-	0/1	65,47	0.443	112
19	nonsynonymous SNV	ENSCAFG00000019493.4:ENSCAFT00000030990.4:exon2:c.C352T:p.P118S,ENSCAFG00000019493.4:ENSCAFT00000068643.1:exon2:c.C199T:p.P67S,	ENSCAFG00000019493	IGFALS	IGFALS	chr6	39117039	39117039	C	T	deleterious(0)	0/1	84,4	0.049	88
19	nonsynonymous SNV	ENSCAFG00000019596.6:ENSCAFT00000079672.1:exon1:c.C223T:p.R75C,	ENSCAFG00000019596	CACNA1H	CACNA1H	chr6	39533531	39533531	G	A	-	0/1	23,13	0.385	36
19	nonsynonymous SNV	ENSCAFG00000019985.5:ENSCAFT00000031806.4:exon60:c.C4214T:p.A1405V,ENSCAFG00000019985.5:ENSCAFT00000031809.5:exon61:c.C4445T:p.A1482V,ENSCAFG00000019985.5:ENSCAFT00000043301.3:exon62:c.C4562T:p.A1521V,ENSCAFG00000019985.5:ENSCAFT00000068169.1:exon62:c.C4598T:p.A1533V,	ENSCAFG00000019985	COL11A1	COL11A1	chr6	47610264	47610264	C	T	tolerated(0.29)	0/1	81,4	0.049	85
19	nonsynonymous SNV	ENSCAFG00000020400.5:ENSCAFT00000032485.4:exon6:c.T331A:p.C111S,ENSCAFG00000020400.5:ENSCAFT00000032487.5:exon6:c.T292A:p.C98S,ENSCAFG00000020400.5:ENSCAFT00000062631.1:exon5:c.T337A:p.C113S,	ENSCAFG00000020400	SLC44A5	SLC44A5	chr6	71231550	71231550	T	A	deleterious(0)	0/1	16,4	0.189	20
19	synonymous SNV	ENSCAFG00000029474.2:ENSCAFT00000087924.1:exon1:c.C39T:p.S13S,ENSCAFG00000029474.2:ENSCAFT00000046905.2:exon1:c.C285T:p.S95S,ENSCAFG00000029474.2:ENSCAFT00000063186.1:exon1:c.C285T:p.S95S,	ENSCAFG00000029474	GADD45A	GADD45A	chr6	77396284	77396284	G	A	-	0/1	18,7	0.299	25
19	nonsynonymous SNV	ENSCAFG00000011422.4:ENSCAFT00000018141.4:exon28:c.C3948A:p.N1316K,ENSCAFG00000011422.4:ENSCAFT00000092036.1:exon28:c.C3945A:p.N1315K,ENSCAFG00000011422.4:ENSCAFT00000060157.1:exon26:c.C3663A:p.N1221K,ENSCAFG00000011422.4:ENSCAFT00000093408.1:exon26:c.C3702A:p.N1234K,ENSCAFG00000011422.4:ENSCAFT00000073024.1:exon28:c.C3945A:p.N1315K,	ENSCAFG00000011422	HELZ	HELZ	chr9	13384269	13384269	C	A	tolerated_low_confidence(0.05)	0/1	103,5	0.052	108
19	nonsynonymous SNV	ENSCAFG00000019530.5:ENSCAFT00000031042.4:exon1:c.A86G:p.E29G,ENSCAFG00000019530.5:ENSCAFT00000081469.1:exon1:c.A86G:p.E29G,	ENSCAFG00000019530	PAXX	PAXX	chr9	48639138	48639138	T	C	deleterious(0.01)	0/1	48,4	0.105	52
20	nonsynonymous SNV	ENSCAFG00000005108.5:ENSCAFT00000008245.5:exon8:c.C674T:p.P225L,ENSCAFG00000005108.5:ENSCAFT00000060103.1:exon8:c.C1115T:p.P372L,	ENSCAFG00000005108	COQ8B	NUMBL	chr1	113097748	113097748	C	T	tolerated(0.11)	0/1	32,3	0.106	35
20	nonsynonymous SNV	ENSCAFG00000005896.5:ENSCAFT00000009509.4:exon64:c.A9479T:p.D3160V,ENSCAFG00000005896.5:ENSCAFT00000048904.3:exon64:c.A9479T:p.D3160V,	ENSCAFG00000005896	RYR1	RYR1	chr1	114516329	114516329	T	A	-	0|1	63,5	0.085	68
20	nonsynonymous SNV	ENSCAFG00000000767.5:ENSCAFT00000048271.2:exon2:c.G2927A:p.C976Y,	ENSCAFG00000000767	CELSR1	CELSR1	chr10	19757743	19757743	G	A	deleterious(0)	0/1	88,4	0.063	92
20	synonymous SNV	ENSCAFG00000003106.5:ENSCAFT00000088642.1:exon13:c.T2418C:p.N806N,ENSCAFG00000003106.5:ENSCAFT00000004986.5:exon14:c.T2418C:p.N806N,ENSCAFG00000003106.5:ENSCAFT00000072736.1:exon10:c.T2118C:p.N706N,ENSCAFG00000003106.5:ENSCAFT00000067462.1:exon15:c.T2523C:p.N841N,ENSCAFG00000003106.5:ENSCAFT00000004987.4:exon15:c.T2523C:p.N841N,ENSCAFG00000003106.5:ENSCAFT00000082185.1:exon14:c.T2523C:p.N841N,ENS…	ENSCAFG00000003106	EHBP1	EHBP1	chr10	62739190	62739190	T	C	-	0/1	21,6	0.211	27
20	nonsynonymous SNV	ENSCAFG00000000710.4:ENSCAFT00000001116.4:exon8:c.T1472G:p.V491G,	ENSCAFG00000000710	SLC27A6	SLC27A6	chr11	17962322	17962322	T	G	deleterious(0)	0/1	30,18	0.314	48
20	nonframeshift deletion	ENSCAFG00000001086.4:ENSCAFT00000001656.4:exon2:c.204_218del:p.68_73del,	ENSCAFG00000001086	MYC	MYC	chr13	25203031	25203045	GCTGCCCACCCCGCC	-	-	0/1	49,4	0.091	53
20	nonsynonymous SNV	ENSCAFG00000023904.3:ENSCAFT00000002676.4:exon4:c.G319A:p.A107T,ENSCAFG00000023904.3:ENSCAFT00000060025.1:exon4:c.G319A:p.A107T,	ENSCAFG00000023904	CHRNB4	CHRNB4	chr13	38322083	38322083	G	A	deleterious(0.03)	0/1	32,4	0.148	36
20	nonsynonymous SNV	ENSCAFG00000002765.4:ENSCAFT00000081401.1:exon48:c.G5544A:p.M1848I,ENSCAFG00000002765.4:ENSCAFT00000004385.5:exon48:c.G2592A:p.M864I,ENSCAFG00000002765.4:ENSCAFT00000004388.4:exon48:c.G5544A:p.M1848I,ENSCAFG00000002765.4:ENSCAFT00000068312.1:exon48:c.G5544A:p.M1848I,	ENSCAFG00000002765	UBA6	UBA6	chr13	58024089	58024089	C	T	tolerated(0.53)	0/1	30,3	0.111	33
20	frameshift deletion	ENSCAFG00000001754.4:ENSCAFT00000087472.1:exon10:c.1201delC:p.Q401fs,ENSCAFG00000001754.4:ENSCAFT00000002746.4:exon15:c.1738delC:p.Q580fs,ENSCAFG00000001754.4:ENSCAFT00000062245.1:exon16:c.1654delC:p.Q552fs,ENSCAFG00000001754.4:ENSCAFT00000080986.1:exon10:c.904delC:p.Q302fs,ENSCAFG00000001754.4:ENSCAFT00000082826.1:exon12:c.1573delC:p.Q525fs,ENSCAFG00000001754.4:ENSCAFT00000086242.1:exon11:c.1357…	ENSCAFG00000001754	POT1	POT1	chr14	11053081	11053081	C	-	-	0/1	39,11	0.228	50
20	synonymous SNV	ENSCAFG00000007907.5:ENSCAFT00000074323.1:exon5:c.C621T:p.T207T,ENSCAFG00000007907.5:ENSCAFT00000080713.1:exon8:c.C1050T:p.T350T,ENSCAFG00000007907.5:ENSCAFT00000012691.4:exon8:c.C1050T:p.T350T,ENSCAFG00000007907.5:ENSCAFT00000064975.1:exon7:c.C954T:p.T318T,ENSCAFG00000007907.5:ENSCAFT00000049732.3:exon8:c.C1050T:p.T350T,ENSCAFG00000007907.5:ENSCAFT00000067675.1:exon6:c.C717T:p.T239T,ENSCAFG00000…	ENSCAFG00000007907	LRBA	LRBA	chr15	48893503	48893503	G	A	-	0/1	22,8	0.261	30
20	nonsynonymous SNV	ENSCAFG00000005217.4:ENSCAFT00000091349.1:exon25:c.A3065G:p.D1022G,ENSCAFG00000005217.4:ENSCAFT00000084035.1:exon26:c.A3206G:p.D1069G,ENSCAFG00000005217.4:ENSCAFT00000008416.3:exon26:c.A3212G:p.D1071G,ENSCAFG00000005217.4:ENSCAFT00000086335.1:exon25:c.A3080G:p.D1027G,	ENSCAFG00000005217	NCAPG2	NCAPG2	chr16	20658009	20658009	T	C	tolerated(0.07)	0/1	23,3	0.167	26
20	stopgain	ENSCAFG00000006830.5:ENSCAFT00000010990.4:exon2:c.G11A:p.W4X,ENSCAFG00000006830.5:ENSCAFT00000074046.1:exon2:c.G11A:p.W4X,ENSCAFG00000006830.5:ENSCAFT00000091354.1:exon2:c.G11A:p.W4X,ENSCAFG00000006830.5:ENSCAFT00000081565.1:exon2:c.G11A:p.W4X,ENSCAFG00000006830.5:ENSCAFT00000087819.1:exon2:c.G11A:p.W4X,	ENSCAFG00000006830	MSR1	MSR1	chr16	39502765	39502765	C	T	-	0/1	63,5	0.103	68
20	frameshift insertion	ENSCAFG00000003729.4:ENSCAFT00000093242.1:exon20:c.2355dupA:p.S786fs,ENSCAFG00000003729.4:ENSCAFT00000089727.1:exon20:c.2595dupA:p.S866fs,ENSCAFG00000003729.4:ENSCAFT00000064511.1:exon22:c.2604dupA:p.S869fs,ENSCAFG00000003729.4:ENSCAFT00000077426.1:exon21:c.2676dupA:p.S893fs,ENSCAFG00000003729.4:ENSCAFT00000062419.1:exon20:c.2595dupA:p.S866fs,ENSCAFG00000003729.4:ENSCAFT00000006012.4:exon22:c.260…	ENSCAFG00000003729	SMC6	SMC6	chr17	13146984	13146984	-	T	-	0/1	93,11	0.111	104
20	nonsynonymous SNV	ENSCAFG00000004365.5:ENSCAFT00000007017.4:exon9:c.C1003G:p.R335G,ENSCAFG00000004365.5:ENSCAFT00000091329.1:exon9:c.C1003G:p.R335G,ENSCAFG00000004365.5:ENSCAFT00000007020.5:exon7:c.C904G:p.R302G,	ENSCAFG00000004365	ABI1	ABI1	chr2	7045304	7045304	C	G	deleterious(0)	0/1	68,7	0.117	75
20	nonsynonymous SNV	ENSCAFG00000004145.5:ENSCAFT00000048055.3:exon10:c.C1156T:p.P386S,ENSCAFG00000004145.5:ENSCAFT00000006652.5:exon9:c.C1144T:p.P382S,	ENSCAFG00000004145	MLLT1-	MLLT1-	chr2	11415405	11415405	G	A	tolerated(0.12)	0/1	133,10	0.073	143
20	nonsynonymous SNV	ENSCAFG00000013269.4:ENSCAFT00000021046.4:exon2:c.C332G:p.S111C,	ENSCAFG00000013269	ID3	ID3	chr2	75881172	75881172	C	G	deleterious(0)	0/1	81,17	0.176	98
20	frameshift deletion	ENSCAFG00000013392.4:ENSCAFT00000060515.1:exon14:c.6170delG:p.R2057fs,ENSCAFG00000013392.4:ENSCAFT00000021260.4:exon14:c.6170delG:p.R2057fs,ENSCAFG00000013392.4:ENSCAFT00000064752.1:exon14:c.6170delG:p.R2057fs,ENSCAFG00000013392.4:ENSCAFT00000072365.1:exon14:c.6170delG:p.R2057fs,ENSCAFG00000013392.4:ENSCAFT00000077709.1:exon14:c.6170delG:p.R2057fs,ENSCAFG00000013392.4:ENSCAFT00000071377.1:exon14:…	ENSCAFG00000013392	SETD2	SETD2	chr20	41762960	41762960	G	-	-	0/1	44,8	0.142	52
20	nonsynonymous SNV	ENSCAFG00000019448.4:ENSCAFT00000030926.4:exon3:c.G553A:p.V185I,	ENSCAFG00000019448	ABHD17A	ABHD17A	chr20	57091294	57091294	G	A	tolerated(1)	0/1	17,3	0.199	20
20	synonymous SNV	ENSCAFG00000029264.2:ENSCAFT00000045048.2:exon12:c.C1374A:p.P458P,	ENSCAFG00000029264	MINDY4B	MINDY4B	chr23	45456045	45456045	G	T	-	0/1	57,4	0.062	61
20	synonymous SNV	ENSCAFG00000042565.1:ENSCAFT00000061519.1:exon2:c.C465T:p.N155N,	ENSCAFG00000042565	-	C2-orf173	chr24	24483918	24483918	G	A	-	0/1	72,10	0.127	82
20	nonsynonymous SNV	ENSCAFG00000012570.4:ENSCAFT00000019968.4:exon6:c.C683T:p.S228L,	ENSCAFG00000012570	MTG2	MTG2	chr24	46227166	46227166	C	T	deleterious(0)	0/1	117,17	0.154	134
20	nonsynonymous SNV	ENSCAFG00000007857.4:ENSCAFT00000012543.4:exon3:c.A160T:p.N54Y,	ENSCAFG00000007857	SCRG1	SCRG1	chr25	23989775	23989775	T	A	deleterious_low_confidence(0.05)	0|1	89,6	0.089	95
20	synonymous SNV	ENSCAFG00000007857.4:ENSCAFT00000012543.4:exon3:c.A159T:p.V53V,	ENSCAFG00000007857	SCRG1	SCRG1	chr25	23989776	23989776	T	A	-	0|1	89,6	0.089	95
20	synonymous SNV	ENSCAFG00000009076.4:ENSCAFT00000064165.1:exon3:c.T276C:p.Y92Y,ENSCAFG00000009076.4:ENSCAFT00000061393.1:exon3:c.T264C:p.Y88Y,ENSCAFG00000009076.4:ENSCAFT00000014432.4:exon3:c.T339C:p.Y113Y,ENSCAFG00000009076.4:ENSCAFT00000073939.1:exon3:c.T279C:p.Y93Y,	ENSCAFG00000009076	PLBD2	PLBD2	chr26	10706897	10706897	T	C	-	0/1	97,4	0.041	101
20	nonsynonymous SNV	ENSCAFG00000009865.5:ENSCAFT00000015680.5:exon14:c.G2126A:p.R709Q,	ENSCAFG00000009865	KSR2	KSR2	chr26	14046831	14046831	C	T	deleterious(0.03)	0/1	65,4	0.081	69
20	nonsynonymous SNV	ENSCAFG00000011720.4:ENSCAFT00000066664.1:exon3:c.G1370A:p.R457Q,ENSCAFG00000011720.4:ENSCAFT00000018616.4:exon4:c.G1253A:p.R418Q,	ENSCAFG00000011720	ASPHD2	ASPHD2	chr26	20122062	20122062	G	A	deleterious(0.01)	0/1	200,34	0.139	234
20	synonymous SNV	ENSCAFG00000009152.4:ENSCAFT00000014571.4:exon24:c.A3186G:p.K1062K,ENSCAFG00000009152.4:ENSCAFT00000065986.1:exon25:c.A3327G:p.K1109K,ENSCAFG00000009152.4:ENSCAFT00000093421.1:exon24:c.A2766G:p.K922K,ENSCAFG00000009152.4:ENSCAFT00000089982.1:exon25:c.A2877G:p.K959K,ENSCAFG00000009152.4:ENSCAFT00000083032.1:exon24:c.A2736G:p.K912K,	ENSCAFG00000009152	HDAC7	HDAC7	chr27	6966080	6966080	A	G	-	0/1	86,4	0.064	90
20	nonsynonymous SNV	ENSCAFG00000013215.4:ENSCAFT00000065510.1:exon7:c.G532A:p.V178I,ENSCAFG00000013215.4:ENSCAFT00000020938.4:exon4:c.G592A:p.V198I,ENSCAFG00000013215.4:ENSCAFT00000085615.1:exon4:c.G553A:p.V185I,	ENSCAFG00000013215	GPRC5D	GPRC5D	chr27	33298860	33298860	G	A	tolerated(1)	0/1	137,4	0.041	141
20	synonymous SNV	ENSCAFG00000007467.5:ENSCAFT00000088748.1:exon3:c.G291A:p.L97L,ENSCAFG00000007467.5:ENSCAFT00000011973.5:exon3:c.G291A:p.L97L,ENSCAFG00000007467.5:ENSCAFT00000011966.4:exon3:c.G291A:p.L97L,	ENSCAFG00000007467	IDE	IDE	chr28	6930076	6930076	C	T	-	0/1	33,4	0.143	37
20	frameshift deletion	ENSCAFG00000008302.5:ENSCAFT00000013201.5:exon4:c.76delT:p.F26fs,ENSCAFG00000008302.5:ENSCAFT00000074240.1:exon4:c.76delT:p.F26fs,ENSCAFG00000008302.5:ENSCAFT00000044684.2:exon4:c.76delT:p.F26fs,ENSCAFG00000008302.5:ENSCAFT00000013212.5:exon4:c.76delT:p.F26fs,	ENSCAFG00000008302	MEF2C	MEF2C	chr3	19870465	19870465	T	-	-	0/1	18,5	0.246	23
20	synonymous SNV	ENSCAFG00000009653.5:ENSCAFT00000015337.4:exon13:c.C1716T:p.P572P,ENSCAFG00000009653.5:ENSCAFT00000081673.1:exon13:c.C1734T:p.P578P,ENSCAFG00000009653.5:ENSCAFT00000042837.3:exon14:c.C1833T:p.P611P,ENSCAFG00000009653.5:ENSCAFT00000073789.1:exon14:c.C1833T:p.P611P,ENSCAFG00000009653.5:ENSCAFT00000073315.1:exon11:c.C1371T:p.P457P,ENSCAFG00000009653.5:ENSCAFT00000066111.1:exon14:c.C1833T:p.P611P,	ENSCAFG00000009653	DOP1B	DOP1B	chr31	31486415	31486415	C	T	-	0/1	92,36	0.275	128
20	synonymous SNV	ENSCAFG00000009800.4:ENSCAFT00000015560.4:exon7:c.C633T:p.L211L,	ENSCAFG00000009800	-	HERC5	chr32	11765147	11765147	C	T	-	0/1	49,4	0.102	53
20	synonymous SNV	ENSCAFG00000009608.3:ENSCAFT00000015275.2:exon1:c.G30A:p.L10L,	ENSCAFG00000009608	CEP97	CEP97	chr33	8040803	8040803	G	A	-	0/1	31,4	0.103	35
20	synonymous SNV	ENSCAFG00000013289.6:ENSCAFT00000071924.1:exon3:c.G324A:p.A108A,ENSCAFG00000013289.6:ENSCAFT00000072134.1:exon4:c.G513A:p.A171A,ENSCAFG00000013289.6:ENSCAFT00000075937.1:exon4:c.G513A:p.A171A,ENSCAFG00000013289.6:ENSCAFT00000088496.1:exon3:c.G438A:p.A146A,ENSCAFG00000013289.6:ENSCAFT00000021112.5:exon4:c.G513A:p.A171A,ENSCAFG00000013289.6:ENSCAFT00000044816.3:exon3:c.G267A:p.A89A,ENSCAFG000000132…	ENSCAFG00000013289	PBX1	PBX1	chr38	18464749	18464749	C	T	-	0/1	15,3	0.267	18
20	nonsynonymous SNV	ENSCAFG00000011787.3:ENSCAFT00000018706.3:exon2:c.G235A:p.V79M,	ENSCAFG00000011787	CRP	CRP	chr38	22397668	22397668	G	A	deleterious(0.03)	0/1	88,16	0.164	104
20	synonymous SNV	ENSCAFG00000018072.5:ENSCAFT00000035516.3:exon1:c.T96C:p.Y32Y,ENSCAFG00000018072.5:ENSCAFT00000028722.5:exon1:c.T96C:p.Y32Y,	ENSCAFG00000018072	DCTN4	DCTN4	chr4	58423730	58423730	T	C	-	0/1	85,17	0.147	102
20	nonsynonymous SNV	ENSCAFG00000013720.4:ENSCAFT00000021759.4:exon3:c.T311C:p.V104A,	ENSCAFG00000013720	ZW1-	ZW1-	chr5	19504754	19504754	T	C	tolerated(0.57)	0/1	56,4	0.077	60
20	synonymous SNV	ENSCAFG00000043957.1:ENSCAFT00000044728.2:exon3:c.C702T:p.N234N,ENSCAFG00000043957.1:ENSCAFT00000086621.1:exon4:c.C360T:p.N120N,	ENSCAFG00000043957	-	TRIM16	chr5	39156838	39156838	G	A	-	0/1	81,4	0.066	85
20	synonymous SNV	ENSCAFG00000032573.2:ENSCAFT00000043418.2:exon3:c.G282A:p.S94S,	ENSCAFG00000032573	CCL26	CCL26	chr6	7151355	7151355	C	T	-	0/1	49,5	0.098	54
20	nonsynonymous SNV	ENSCAFG00000019596.6:ENSCAFT00000027134.5:exon11:c.G2422A:p.V808M,ENSCAFG00000019596.6:ENSCAFT00000031144.5:exon10:c.G2422A:p.V808M,ENSCAFG00000019596.6:ENSCAFT00000079672.1:exon11:c.G2902A:p.V968M,	ENSCAFG00000019596	CACNA1H	CACNA1H	chr6	39523878	39523878	C	T	deleterious(0)	0/1	57,14	0.154	71
20	nonsynonymous SNV	ENSCAFG00000020233.4:ENSCAFT00000087785.1:exon3:c.T1112C:p.I371T,ENSCAFG00000020233.4:ENSCAFT00000036423.3:exon4:c.T392C:p.I131T,	ENSCAFG00000020233	LMO4	LMO4	chr6	60898211	60898211	A	G	deleterious_low_confidence(0.01)	0/1	76,7	0.089	83
20	synonymous SNV	ENSCAFG00000020340.5:ENSCAFT00000081735.1:exon8:c.A1353G:p.P451P,ENSCAFG00000020340.5:ENSCAFT00000032396.5:exon9:c.A1506G:p.P502P,ENSCAFG00000020340.5:ENSCAFT00000066832.1:exon9:c.A1506G:p.P502P,ENSCAFG00000020340.5:ENSCAFT00000032397.4:exon8:c.A1356G:p.P452P,	ENSCAFG00000020340	ADGRL4	ADGRL4	chr6	68155487	68155487	A	G	-	0/1	22,4	0.149	26
20	synonymous SNV	ENSCAFG00000010274.4:ENSCAFT00000073770.1:exon2:c.C339A:p.L113L,ENSCAFG00000010274.4:ENSCAFT00000016313.4:exon4:c.C279A:p.L93L,	ENSCAFG00000010274	CHI3L1	CHI3L1	chr7	28222	28222	C	A	-	0/1	46,11	0.166	57
20	synonymous SNV	ENSCAFG00000017511.4:ENSCAFT00000084715.1:exon1:c.C189T:p.A63A,ENSCAFG00000017511.4:ENSCAFT00000027756.4:exon1:c.C189T:p.A63A,ENSCAFG00000017511.4:ENSCAFT00000078795.1:exon1:c.C189T:p.A63A,ENSCAFG00000017511.4:ENSCAFT00000083410.1:exon1:c.C189T:p.A63A,	ENSCAFG00000017511	NPR1	NPR1	chr7	43395839	43395839	G	A	-	0/1	13,4	0.213	17
20	nonsynonymous SNV	ENSCAFG00000047832.1:ENSCAFT00000060443.1:exon1:c.C192G:p.S64R,	ENSCAFG00000047832	-	-	chr7	79024496	79024496	C	G	-	0/1	33,4	0.166	37
20	synonymous SNV	ENSCAFG00000013418.4:ENSCAFT00000021292.4:exon1:c.C126T:p.Y42Y,	ENSCAFG00000013418	NFKBIA	NFKBIA	chr8	14103220	14103220	G	A	-	0/1	95,12	0.153	107
20	synonymous SNV	ENSCAFG00000046771.1:ENSCAFT00000077325.1:exon2:c.G69A:p.L23L,	ENSCAFG00000046771	-	IGHV4-4	chr8	73028694	73028694	C	T	-	0/1	27,13	0.323	40
20	nonsynonymous SNV	ENSCAFG00000013774.4:ENSCAFT00000075933.1:exon1:c.G194A:p.G65D,ENSCAFG00000013774.4:ENSCAFT00000021854.4:exon1:c.G194A:p.G65D,ENSCAFG00000013774.4:ENSCAFT00000088008.1:exon1:c.G194A:p.G65D,	ENSCAFG00000013774	MAP3K14	MAP3K14	chr9	18280411	18280411	G	A	deleterious(0)	0/1	56,31	0.381	87
20	nonframeshift deletion	ENSCAFG00000013774.4:ENSCAFT00000075933.1:exon4:c.647_685del:p.216_229del,ENSCAFG00000013774.4:ENSCAFT00000021854.4:exon4:c.647_685del:p.216_229del,ENSCAFG00000013774.4:ENSCAFT00000088008.1:exon4:c.647_685del:p.216_229del,	ENSCAFG00000013774	MAP3K14	MAP3K14	chr9	18284061	18284099	ACCTACGGCCAGCACTGCCTCGATCGGAACTCCATAAAC	-	-	0/1	118,30	0.214	148
20	nonsynonymous SNV	ENSCAFG00000016967.4:ENSCAFT00000026866.4:exon4:c.C496T:p.R166C,	ENSCAFG00000016967	PDK2	PDK2	chr9	26110122	26110122	C	T	deleterious(0)	0/1	55,28	0.322	83
20	synonymous SNV	ENSCAFG00000017457.5:ENSCAFT00000072079.1:exon3:c.T2178A:p.I726I,ENSCAFG00000017457.5:ENSCAFT00000081899.1:exon3:c.T2178A:p.I726I,ENSCAFG00000017457.5:ENSCAFT00000073255.1:exon3:c.T2178A:p.I726I,ENSCAFG00000017457.5:ENSCAFT00000092105.1:exon3:c.T2178A:p.I726I,ENSCAFG00000017457.5:ENSCAFT00000088334.1:exon3:c.T2178A:p.I726I,ENSCAFG00000017457.5:ENSCAFT00000027666.5:exon3:c.T2178A:p.I726I,	ENSCAFG00000017457	-	PCDH11Y	chrX	68772617	68772617	T	A	-	0/1	75,9	0.103	84
20	nonsynonymous SNV	ENSCAFG00000018940.4:ENSCAFT00000017384.3:exon4:c.G3468A:p.M1156I,	ENSCAFG00000018940	ADGRG4	ADGRG4	chrX	106718654	106718654	G	A	tolerated(0.14)	0/1	71,9	0.159	80
21	nonsynonymous SNV	ENSCAFG00000004080.5:ENSCAFT00000006545.5:exon7:c.C887T:p.A296V,ENSCAFG00000004080.5:ENSCAFT00000088923.1:exon6:c.C791T:p.A264V,	ENSCAFG00000004080	NOP53	NOP53	chr1	108309385	108309385	G	A	deleterious(0)	0/1	26,3	0.136	29
21	synonymous SNV	ENSCAFG00000030170.2:ENSCAFT00000068444.1:exon3:c.A894T:p.L298L,ENSCAFG00000030170.2:ENSCAFT00000050039.2:exon3:c.A780T:p.L260L,ENSCAFG00000030170.2:ENSCAFT00000075560.1:exon2:c.A663T:p.L221L,	ENSCAFG00000030170	ZNF229	ZNF229	chr1	110885133	110885133	A	T	-	0/1	56,5	0.108	61
21	nonsynonymous SNV	ENSCAFG00000000345.5:ENSCAFT00000085771.1:exon20:c.C2485T:p.P829S,ENSCAFG00000000345.5:ENSCAFT00000000539.5:exon21:c.C2563T:p.P855S,ENSCAFG00000000345.5:ENSCAFT00000048655.2:exon21:c.C2494T:p.P832S,	ENSCAFG00000000345	SRGAP1	SRGAP1	chr10	6937430	6937430	C	T	tolerated(0.56)	0/1	69,4	0.071	73
21	synonymous SNV	ENSCAFG00000000566.4:ENSCAFT00000000876.4:exon8:c.C1245T:p.H415H,	ENSCAFG00000000566	ARSA	ARSA	chr10	16694067	16694067	C	T	-	0/1	84,4	0.063	88
21	nonsynonymous SNV	ENSCAFG00000000887.5:ENSCAFT00000047071.2:exon8:c.G698T:p.R233L,ENSCAFG00000000887.5:ENSCAFT00000070244.1:exon7:c.G596T:p.R199L,ENSCAFG00000000887.5:ENSCAFT00000001384.5:exon8:c.G698T:p.R233L,ENSCAFG00000000887.5:ENSCAFT00000063655.1:exon8:c.G698T:p.R233L,	ENSCAFG00000000887	SAMM5-	SAMM5-	chr10	21688305	21688305	C	A	deleterious(0)	0|1	45,4	0.125	49
21	nonframeshift deletion	ENSCAFG00000001581.4:ENSCAFT00000076407.1:exon18:c.3381_3383del:p.1127_1128del,ENSCAFG00000001581.4:ENSCAFT00000002481.4:exon19:c.3456_3458del:p.1152_1153del,ENSCAFG00000001581.4:ENSCAFT00000062537.1:exon18:c.3405_3407del:p.1135_1136del,	ENSCAFG00000001581	ADAMTSL1	ADAMTSL1	chr11	38626407	38626409	GGA	-	-	0/1	5,3	0.333	8
21	nonsynonymous SNV	ENSCAFG00000003608.5:ENSCAFT00000005822.4:exon14:c.C2264T:p.A755V,ENSCAFG00000003608.5:ENSCAFT00000082789.1:exon15:c.C2321T:p.A774V,ENSCAFG00000003608.5:ENSCAFT00000073663.1:exon14:c.C2264T:p.A755V,ENSCAFG00000003608.5:ENSCAFT00000069087.1:exon15:c.C2321T:p.A774V,ENSCAFG00000003608.5:ENSCAFT00000005830.4:exon15:c.C2321T:p.A774V,	ENSCAFG00000003608	CNTRL	CNTRL	chr11	74122348	74122348	C	T	deleterious(0)	0/1	32,3	0.111	35
21	nonsynonymous SNV	ENSCAFG00000029143.2:ENSCAFT00000048384.2:exon3:c.G2227A:p.A743T,	ENSCAFG00000029143	BEND3	BEND3	chr12	64306409	64306409	C	T	deleterious(0)	0/1	68,5	0.069	73
21	nonsynonymous SNV	ENSCAFG00000003595.4:ENSCAFT00000005784.4:exon3:c.C419G:p.A140G,	ENSCAFG00000003595	SFPQ	SFPQ	chr15	6880532	6880532	C	G	tolerated_low_confidence(0.18)	0/1	11,4	0.25	15
21	nonsynonymous SNV	ENSCAFG00000031381.2:ENSCAFT00000049053.2:exon1:c.G662A:p.R221H,	ENSCAFG00000031381	SARAF	SARAF	chr16	34195015	34195015	G	A	deleterious_low_confidence(0)	0/1	16,4	0.175	20
21	nonsynonymous SNV	ENSCAFG00000006264.4:ENSCAFT00000010157.4:exon5:c.G6096A:p.M2032I,ENSCAFG00000006264.4:ENSCAFT00000073667.1:exon5:c.G6096A:p.M2032I,	ENSCAFG00000006264	PCLO	PCLO	chr18	22516816	22516816	C	T	tolerated(0.3)	0/1	68,4	0.056	72
21	nonsynonymous SNV	ENSCAFG00000004206.3:ENSCAFT00000006747.3:exon1:c.G2324A:p.R775H,	ENSCAFG00000004206	AMER3	AMER3	chr19	20452707	20452707	G	A	tolerated_low_confidence(0.58)	0/1	42,35	0.459	77
21	nonsynonymous SNV	ENSCAFG00000037999.2:ENSCAFT00000055766.2:exon1:c.C2180T:p.S727L,	ENSCAFG00000037999	-	-	chr19	20620671	20620671	C	T	deleterious(0.03)	0/1	50,33	0.426	83
21	nonsynonymous SNV	ENSCAFG00000004006.5:ENSCAFT00000006428.4:exon36:c.A6613G:p.K2205E,ENSCAFG00000004006.5:ENSCAFT00000085062.1:exon36:c.A6703G:p.K2235E,ENSCAFG00000004006.5:ENSCAFT00000081004.1:exon39:c.A6610G:p.K2204E,ENSCAFG00000004006.5:ENSCAFT00000068021.1:exon40:c.A6688G:p.K2230E,ENSCAFG00000004006.5:ENSCAFT00000068049.1:exon39:c.A6640G:p.K2214E,ENSCAFG00000004006.5:ENSCAFT00000090380.1:exon36:c.A5839G:p.K194…	ENSCAFG00000004006	SVIL	SVIL	chr2	16005113	16005113	T	C	deleterious(0.02)	0/1	70,6	0.069	76
21	stopgain	ENSCAFG00000005468.5:ENSCAFT00000076468.1:exon1:c.C136T:p.Q46X,ENSCAFG00000005468.5:ENSCAFT00000008870.4:exon1:c.C136T:p.Q46X,	ENSCAFG00000005468	PFKP	PFKP	chr2	32260776	32260776	G	A	-	0/1	63,5	0.078	68
21	nonsynonymous SNV	ENSCAFG00000031290.2:ENSCAFT00000087868.1:exon3:c.G616A:p.A206T,ENSCAFG00000031290.2:ENSCAFT00000048751.2:exon2:c.G673A:p.A225T,	ENSCAFG00000031290	C1QA	C1QA	chr2	76668421	76668421	C	T	deleterious(0)	0/1	91,4	0.044	95
21	nonsynonymous SNV	ENSCAFG00000023155.3:ENSCAFT00000035428.3:exon1:c.G539A:p.R180H,	ENSCAFG00000023155	IER2	IER2	chr20	49072364	49072364	C	T	tolerated(0.09)	0/1	30,21	0.442	51
21	nonsynonymous SNV	ENSCAFG00000043193.1:ENSCAFT00000080443.1:exon1:c.T62C:p.V21A,	ENSCAFG00000043193	RPL36	RPL36	chr20	54334795	54334795	A	G	tolerated(0.16)	0/1	23,15	0.387	38
21	nonsynonymous SNV	ENSCAFG00000004399.5:ENSCAFT00000079042.1:exon2:c.C515T:p.P172L,ENSCAFG00000004399.5:ENSCAFT00000007078.5:exon2:c.C515T:p.P172L,ENSCAFG00000004399.5:ENSCAFT00000085798.1:exon2:c.C515T:p.P172L,	ENSCAFG00000004399	FZD4	FZD4	chr21	12702872	12702872	C	T	deleterious(0.01)	0/1	50,37	0.459	87
21	stopgain	ENSCAFG00000008603.5:ENSCAFT00000077782.1:exon2:c.C337T:p.Q113X,ENSCAFG00000008603.5:ENSCAFT00000013656.4:exon2:c.C337T:p.Q113X,ENSCAFG00000008603.5:ENSCAFT00000082838.1:exon4:c.C337T:p.Q113X,ENSCAFG00000008603.5:ENSCAFT00000013668.4:exon4:c.C337T:p.Q113X,ENSCAFG00000008603.5:ENSCAFT00000079548.1:exon2:c.C337T:p.Q113X,ENSCAFG00000008603.5:ENSCAFT00000069168.1:exon2:c.C337T:p.Q113X,ENSCAFG00000008…	ENSCAFG00000008603	MBNL1	MBNL1	chr23	46900018	46900018	C	T	-	0/1	57,31	0.368	88
21	nonsynonymous SNV	ENSCAFG00000031326.2:ENSCAFT00000045511.2:exon1:c.C886T:p.R296C,	ENSCAFG00000031326	CEBPB	CEBPB	chr24	36662501	36662501	C	T	deleterious(0)	0/1	25,4	0.143	29
21	nonsynonymous SNV	ENSCAFG00000013120.6:ENSCAFT00000092118.1:exon9:c.C2065T:p.R689C,ENSCAFG00000013120.6:ENSCAFT00000060223.1:exon9:c.C2065T:p.R689C,ENSCAFG00000013120.6:ENSCAFT00000091797.1:exon9:c.C2065T:p.R689C,ENSCAFG00000013120.6:ENSCAFT00000020832.5:exon9:c.C2065T:p.R689C,ENSCAFG00000013120.6:ENSCAFT00000084827.1:exon10:c.C1984T:p.R662C,ENSCAFG00000013120.6:ENSCAFT00000077652.1:exon10:c.C1984T:p.R662C,ENSCAFG…	ENSCAFG00000013120	ZNF512B	ZNF512B	chr24	47429407	47429407	G	A	deleterious(0)	0/1	34,3	0.1	37
21	nonsynonymous SNV	ENSCAFG00000016452.4:ENSCAFT00000026079.4:exon3:c.G620A:p.R207Q,	ENSCAFG00000016452	PI4K2B	PI4K2B	chr3	84996389	84996389	C	T	deleterious(0)	0/1	84,4	0.045	88
21	nonsynonymous SNV	ENSCAFG00000009247.5:ENSCAFT00000014761.4:exon37:c.C6392T:p.A2131V,ENSCAFG00000009247.5:ENSCAFT00000071781.1:exon36:c.C6308T:p.A2103V,ENSCAFG00000009247.5:ENSCAFT00000074071.1:exon38:c.C6287T:p.A2096V,ENSCAFG00000009247.5:ENSCAFT00000065696.1:exon37:c.C6392T:p.A2131V,ENSCAFG00000009247.5:ENSCAFT00000088737.1:exon38:c.C6284T:p.A2095V,ENSCAFG00000009247.5:ENSCAFT00000060833.1:exon36:c.C6338T:p.A211…	ENSCAFG00000009247	WDFY3	WDFY3	chr32	8500255	8500255	G	A	deleterious(0)	0/1	56,4	0.069	60
21	nonsynonymous SNV	ENSCAFG00000009582.4:ENSCAFT00000015219.4:exon1:c.A35G:p.D12G,	ENSCAFG00000009582	TXNDC5	TXNDC5	chr35	7854748	7854748	T	C	deleterious(0)	0/1	56,6	0.091	62
21	stopgain	ENSCAFG00000014160.6:ENSCAFT00000049152.3:exon19:c.A2395T:p.R799X,ENSCAFG00000014160.6:ENSCAFT00000022474.5:exon19:c.A2395T:p.R799X,	ENSCAFG00000014160	CWC22	CWC22	chr36	23356711	23356711	T	A	-	0/1	108,4	0.035	112
21	synonymous SNV	ENSCAFG00000013875.6:ENSCAFT00000022017.5:exon3:c.G267A:p.A89A,ENSCAFG00000013875.6:ENSCAFT00000069269.1:exon3:c.G135A:p.A45A,ENSCAFG00000013875.6:ENSCAFT00000085863.1:exon4:c.G297A:p.A99A,ENSCAFG00000013875.6:ENSCAFT00000000182.5:exon4:c.G297A:p.A99A,	ENSCAFG00000013875	MYL1	MYL1	chr37	18150317	18150317	C	T	-	0/1	42,38	0.448	80
21	nonsynonymous SNV	ENSCAFG00000016101.3:ENSCAFT00000025545.3:exon2:c.C1285T:p.R429W,ENSCAFG00000016101.3:ENSCAFT00000078538.1:exon2:c.C1459T:p.R487W,	ENSCAFG00000016101	GPRIN2	GPRIN2	chr4	34784406	34784406	C	T	deleterious(0.04)	0/1	26,4	0.119	30
21	nonsynonymous SNV	ENSCAFG00000013258.5:ENSCAFT00000067103.1:exon7:c.C811T:p.R271W,ENSCAFG00000013258.5:ENSCAFT00000021060.5:exon8:c.C823T:p.R275W,ENSCAFG00000013258.5:ENSCAFT00000084646.1:exon8:c.C736T:p.R246W,ENSCAFG00000013258.5:ENSCAFT00000067389.1:exon8:c.C736T:p.R246W,	ENSCAFG00000013258	SIK3	SIK3	chr5	16703778	16703778	C	T	deleterious(0)	0/1	40,4	0.125	44
21	nonsynonymous SNV	ENSCAFG00000018437.6:ENSCAFT00000048471.2:exon3:c.G2152A:p.A718T,ENSCAFG00000018437.6:ENSCAFT00000029281.6:exon3:c.G2152A:p.A718T,ENSCAFG00000018437.6:ENSCAFT00000069214.1:exon3:c.G2152A:p.A718T,	ENSCAFG00000018437	RAI1	RAI1	chr5	41701412	41701412	C	T	tolerated(0.21)	0/1	40,4	0.088	44
21	synonymous SNV	ENSCAFG00000029852.2:ENSCAFT00000081940.1:exon4:c.C339T:p.A113A,ENSCAFG00000029852.2:ENSCAFT00000047108.2:exon3:c.C606T:p.A202A,	ENSCAFG00000029852	ZNF48	ZNF48	chr6	17706145	17706145	G	A	-	0/1	103,4	0.046	107
21	nonsynonymous SNV	ENSCAFG00000019134.5:ENSCAFT00000030386.4:exon22:c.G4154A:p.R1385H,ENSCAFG00000019134.5:ENSCAFT00000076192.1:exon22:c.G4199A:p.R1400H,ENSCAFG00000019134.5:ENSCAFT00000091862.1:exon22:c.G4193A:p.R1398H,ENSCAFG00000019134.5:ENSCAFT00000072089.1:exon22:c.G4199A:p.R1400H,ENSCAFG00000019134.5:ENSCAFT00000044545.3:exon22:c.G4199A:p.R1400H,ENSCAFG00000019134.5:ENSCAFT00000078356.1:exon21:c.G4103A:p.R136…	ENSCAFG00000019134	PPL	PPL	chr6	36540232	36540232	G	A	tolerated(0.06)	0/1	10,18	0.64	28
21	nonsynonymous SNV	ENSCAFG00000045019.1:ENSCAFT00000083232.1:exon2:c.C91T:p.R31W,	ENSCAFG00000045019	-	EME2	chr6	39128772	39128772	G	A	deleterious(0.02)	0/1	24,3	0.143	27
21	nonsynonymous SNV	ENSCAFG00000015803.5:ENSCAFT00000025034.5:exon17:c.G2005A:p.A669T,ENSCAFG00000015803.5:ENSCAFT00000049471.2:exon18:c.G2132A:p.S711N,ENSCAFG00000015803.5:ENSCAFT00000069600.1:exon17:c.G2015A:p.S672N,ENSCAFG00000015803.5:ENSCAFT00000066573.1:exon17:c.G2000A:p.S667N,ENSCAFG00000015803.5:ENSCAFT00000091065.1:exon14:c.G1679A:p.S560N,	ENSCAFG00000015803	SDCCAG8	SDCCAG8	chr7	34631135	34631135	G	A	tolerated(0.21)	0/1	50,4	0.07	54
21	stopgain	ENSCAFG00000018075.4:ENSCAFT00000028719.4:exon6:c.C631T:p.Q211X,ENSCAFG00000018075.4:ENSCAFT00000086511.1:exon6:c.C631T:p.Q211X,	ENSCAFG00000018075	TRAF3	TRAF3	chr8	70774093	70774093	C	T	-	0/1	14,70	0.842	84
21	nonsynonymous SNV	ENSCAFG00000016060.5:ENSCAFT00000079126.1:exon6:c.G890A:p.R297Q,ENSCAFG00000016060.5:ENSCAFT00000035664.4:exon8:c.G1064A:p.R355Q,ENSCAFG00000016060.5:ENSCAFT00000011311.4:exon9:c.G1181A:p.R394Q,	ENSCAFG00000016060	RARA	RARA	chr9	22255569	22255569	C	T	deleterious(0.02)	0/1	10,6	0.411	16
21	nonsynonymous SNV	ENSCAFG00000019746.5:ENSCAFT00000043567.3:exon1:c.C5T:p.A2V,	ENSCAFG00000019746	SOHLH1	SOHLH1	chr9	49593801	49593801	C	T	deleterious_low_confidence(0)	0/1	34,14	0.265	48
21	nonsynonymous SNV	ENSCAFG00000011698.4:ENSCAFT00000093895.1:exon4:c.C3074T:p.T1025M,ENSCAFG00000011698.4:ENSCAFT00000018561.4:exon3:c.C2861T:p.T954M,	ENSCAFG00000011698	TLR7	TLR7	chrX	9358300	9358300	C	T	deleterious(0)	0/1	49,32	0.413	81
21	nonsynonymous SNV	ENSCAFG00000014251.6:ENSCAFT00000086773.1:exon10:c.G985A:p.D329N,ENSCAFG00000014251.6:ENSCAFT00000061818.1:exon8:c.G763A:p.D255N,ENSCAFG00000014251.6:ENSCAFT00000045177.3:exon10:c.G985A:p.D329N,ENSCAFG00000014251.6:ENSCAFT00000092867.1:exon9:c.G886A:p.D296N,ENSCAFG00000014251.6:ENSCAFT00000022643.5:exon9:c.G937A:p.D313N,ENSCAFG00000014251.6:ENSCAFT00000061362.1:exon10:c.G985A:p.D329N,	ENSCAFG00000014251	DDX3X	DDX3X	chrX	35769842	35769842	G	A	deleterious(0)	0/1	37,20	0.39	57
21	nonsynonymous SNV	ENSCAFG00000014251.6:ENSCAFT00000086773.1:exon11:c.C1148T:p.A383V,ENSCAFG00000014251.6:ENSCAFT00000061818.1:exon9:c.C926T:p.A309V,ENSCAFG00000014251.6:ENSCAFT00000045177.3:exon11:c.C1148T:p.A383V,ENSCAFG00000014251.6:ENSCAFT00000092867.1:exon10:c.C1049T:p.A350V,ENSCAFG00000014251.6:ENSCAFT00000022643.5:exon10:c.C1100T:p.A367V,ENSCAFG00000014251.6:ENSCAFT00000061362.1:exon11:c.C1148T:p.A383V,	ENSCAFG00000014251	DDX3X	DDX3X	chrX	35770616	35770616	C	T	deleterious(0)	0/1	18,27	0.553	45
21	nonsynonymous SNV	ENSCAFG00000018016.5:ENSCAFT00000042900.3:exon40:c.C3937A:p.P1313T,ENSCAFG00000018016.5:ENSCAFT00000068409.1:exon38:c.C3811A:p.P1271T,ENSCAFG00000018016.5:ENSCAFT00000028616.4:exon39:c.C3883A:p.P1295T,ENSCAFG00000018016.5:ENSCAFT00000089585.1:exon38:c.C3811A:p.P1271T,	ENSCAFG00000018016	COL4A6	COL4A6	chrX	81699199	81699199	G	T	tolerated(0.09)	0|1	93,5	0.073	98
21	nonsynonymous SNV	ENSCAFG00000018016.5:ENSCAFT00000042900.3:exon40:c.C3936A:p.F1312L,ENSCAFG00000018016.5:ENSCAFT00000068409.1:exon38:c.C3810A:p.F1270L,ENSCAFG00000018016.5:ENSCAFT00000028616.4:exon39:c.C3882A:p.F1294L,ENSCAFG00000018016.5:ENSCAFT00000089585.1:exon38:c.C3810A:p.F1270L,	ENSCAFG00000018016	COL4A6	COL4A6	chrX	81699200	81699200	G	T	tolerated(0.34)	0|1	93,5	0.073	98
22	nonsynonymous SNV	ENSCAFG00000000482.5:ENSCAFT00000047300.3:exon20:c.A2800G:p.K934E,ENSCAFG00000000482.5:ENSCAFT00000000771.4:exon20:c.A2800G:p.K934E,ENSCAFG00000000482.5:ENSCAFT00000086152.1:exon19:c.A2653G:p.K885E,ENSCAFG00000000482.5:ENSCAFT00000085320.1:exon20:c.A2713G:p.K905E,ENSCAFG00000000482.5:ENSCAFT00000063377.1:exon20:c.A2800G:p.K934E,ENSCAFG00000000482.5:ENSCAFT00000075612.1:exon21:c.A2893G:p.K965E,ENS…	ENSCAFG00000000482	FLT4	FLT4	chr11	1171521	1171521	A	G	deleterious(0)	0/1	22,4	0.176	26
22	nonsynonymous SNV	ENSCAFG00000002970.4:ENSCAFT00000004756.4:exon1:c.C470T:p.S157L,	ENSCAFG00000002970	HOXA13	HOXA13	chr14	40374691	40374691	G	A	tolerated(0.05)	0/1	14,3	0.253	17
22	nonsynonymous SNV	ENSCAFG00000030535.2:ENSCAFT00000050012.2:exon1:c.G46A:p.A16T,	ENSCAFG00000030535	C15H12orf73	C12orf73	chr15	42485397	42485397	C	T	deleterious(0.02)	0/1	15,3	0.229	18
22	nonsynonymous SNV	ENSCAFG00000004574.5:ENSCAFT00000007373.5:exon2:c.C505T:p.R169C,	ENSCAFG00000004574	GIMAP1	GIMAP1	chr16	14794260	14794260	G	A	deleterious(0.03)	0/1	15,3	0.214	18
22	synonymous SNV	ENSCAFG00000009494.5:ENSCAFT00000015090.5:exon8:c.A1614G:p.T538T,	ENSCAFG00000009494	DENND2C	DENND2C	chr17	52313042	52313042	T	C	-	0/1	58,4	0.079	62
22	nonsynonymous SNV	ENSCAFG00000013665.4:ENSCAFT00000062510.1:exon4:c.G1318A:p.A440T,ENSCAFG00000013665.4:ENSCAFT00000093480.1:exon4:c.G1318A:p.A440T,ENSCAFG00000013665.4:ENSCAFT00000092153.1:exon4:c.G1318A:p.A440T,ENSCAFG00000013665.4:ENSCAFT00000021670.4:exon4:c.G1318A:p.A440T,	ENSCAFG00000013665	KCND3	KCND3	chr17	63662694	63662694	G	A	deleterious(0.03)	0/1	18,3	0.214	21
22	nonsynonymous SNV	ENSCAFG00000025345.4:ENSCAFT00000047394.3:exon45:c.T6650C:p.L2217P,ENSCAFG00000025345.4:ENSCAFT00000039321.3:exon45:c.T6650C:p.L2217P,	ENSCAFG00000025345	RELN	RELN	chr18	16707694	16707694	T	C	deleterious(0)	0/1	24,3	0.136	27
22	nonsynonymous SNV	ENSCAFG00000008866.5:ENSCAFT00000014088.5:exon6:c.C497T:p.T166M,ENSCAFG00000008866.5:ENSCAFT00000014094.4:exon5:c.C956T:p.T319M,	ENSCAFG00000008866	PACSIN3	PACSIN3	chr18	42395948	42395948	C	T	tolerated(0.06)	0/1	24,4	0.15	28
22	nonsynonymous SNV	ENSCAFG00000014400.4:ENSCAFT00000022875.4:exon10:c.G1174A:p.A392T,ENSCAFG00000014400.4:ENSCAFT00000083962.1:exon11:c.G1366A:p.A456T,ENSCAFG00000014400.4:ENSCAFT00000093697.1:exon36:c.G5248A:p.A1750T,	ENSCAFG00000014400	CCDC88B	CCDC88B	chr18	52712397	52712397	C	T	tolerated(0.42)	0/1	14,3	0.231	17
22	synonymous SNV	ENSCAFG00000005717.5:ENSCAFT00000049432.3:exon139:c.A18834G:p.R6278R,ENSCAFG00000005717.5:ENSCAFT00000049028.3:exon140:c.A18834G:p.R6278R,ENSCAFG00000005717.5:ENSCAFT00000009249.5:exon117:c.A16749G:p.R5583R,	ENSCAFG00000005717	NEB	NEB	chr19	52729126	52729126	T	C	-	0|1	8,2	0.286	10
22	nonsynonymous SNV	ENSCAFG00000005731.5:ENSCAFT00000086500.1:exon8:c.G2351A:p.S784N,ENSCAFG00000005731.5:ENSCAFT00000067401.1:exon9:c.G2321A:p.S774N,ENSCAFG00000005731.5:ENSCAFT00000009237.5:exon10:c.G2549A:p.S850N,	ENSCAFG00000005731	NRG2	NRG2	chr2	35085544	35085544	C	T	tolerated_low_confidence(0.24)	0/1	24,3	0.15	27
22	nonsynonymous SNV	ENSCAFG00000007670.4:ENSCAFT00000012286.4:exon10:c.T1261C:p.F421L,	ENSCAFG00000007670	SLC3-A5	SLC3-A5	chr2	54230491	54230491	T	C	deleterious(0)	0/1	25,4	0.141	29
22	nonsynonymous SNV	ENSCAFG00000008946.5:ENSCAFT00000014246.4:exon9:c.G917A:p.R306H,	ENSCAFG00000008946	GLT8D1	GLT8D1	chr20	37102275	37102275	G	A	deleterious(0)	0/1	56,4	0.07	60
22	synonymous SNV	ENSCAFG00000018229.5:ENSCAFT00000028958.4:exon8:c.C1680T:p.A560A,ENSCAFG00000018229.5:ENSCAFT00000048825.2:exon3:c.C1488T:p.A496A,ENSCAFG00000018229.5:ENSCAFT00000028960.5:exon3:c.C1368T:p.A456A,	ENSCAFG00000018229	ZNF358	ZNF358	chr20	52315714	52315714	C	T	-	0/1	15,3	0.214	18
22	synonymous SNV	ENSCAFG00000011211.5:ENSCAFT00000017821.5:exon11:c.C1794T:p.Y598Y,	ENSCAFG00000011211	ECEL1	ECEL1	chr25	44123137	44123137	G	A	-	0/1	26,3	0.136	29
22	nonsynonymous SNV	ENSCAFG00000010991.4:ENSCAFT00000071710.1:exon34:c.G4175A:p.R1392H,ENSCAFG00000010991.4:ENSCAFT00000075039.1:exon35:c.G4676A:p.R1559H,ENSCAFG00000010991.4:ENSCAFT00000081387.1:exon34:c.G4151A:p.R1384H,ENSCAFG00000010991.4:ENSCAFT00000088861.1:exon34:c.G4562A:p.R1521H,ENSCAFG00000010991.4:ENSCAFT00000017668.4:exon35:c.G4676A:p.R1559H,	ENSCAFG00000010991	ACACB	ACACB	chr26	17791964	17791964	C	T	deleterious(0.02)	0/1	89,4	0.054	93
22	nonsynonymous SNV	ENSCAFG00000009152.4:ENSCAFT00000083032.1:exon4:c.G279C:p.Q93H,ENSCAFG00000009152.4:ENSCAFT00000014571.4:exon4:c.G729C:p.Q243H,ENSCAFG00000009152.4:ENSCAFT00000079230.1:exon5:c.G870C:p.Q290H,ENSCAFG00000009152.4:ENSCAFT00000083109.1:exon4:c.G483C:p.Q161H,ENSCAFG00000009152.4:ENSCAFT00000065986.1:exon5:c.G870C:p.Q290H,ENSCAFG00000009152.4:ENSCAFT00000093421.1:exon5:c.G420C:p.Q140H,ENSCAFG000000091…	ENSCAFG00000009152	HDAC7	HDAC7	chr27	6951772	6951772	G	C	tolerated(0.06)	0|1	8,2	0.3	10
22	synonymous SNV	ENSCAFG00000031318.3:ENSCAFT00000023278.4:exon1:c.G549A:p.R183R,	ENSCAFG00000031318	P3H3	P3H3	chr27	38194354	38194354	C	T	-	0/1	25,5	0.2	30
22	synonymous SNV	ENSCAFG00000010868.4:ENSCAFT00000081192.1:exon7:c.C780A:p.I260I,ENSCAFG00000010868.4:ENSCAFT00000078158.1:exon6:c.C717A:p.I239I,ENSCAFG00000010868.4:ENSCAFT00000075044.1:exon7:c.C780A:p.I260I,ENSCAFG00000010868.4:ENSCAFT00000017316.4:exon7:c.C618A:p.I206I,ENSCAFG00000010868.4:ENSCAFT00000078470.1:exon6:c.C717A:p.I239I,	ENSCAFG00000010868	GPAM	GPAM	chr28	23286407	23286407	G	T	-	0/1	32,4	0.136	36
22	nonsynonymous SNV	ENSCAFG00000011219.5:ENSCAFT00000017826.5:exon1:c.T566C:p.V189A,	ENSCAFG00000011219	ADRB1	ADRB1	chr28	24908789	24908789	T	C	deleterious(0.01)	0/1	44,6	0.114	50
22	nonsynonymous SNV	ENSCAFG00000011513.5:ENSCAFT00000074714.1:exon21:c.G2041A:p.D681N,ENSCAFG00000011513.5:ENSCAFT00000061192.1:exon21:c.G2029A:p.D677N,ENSCAFG00000011513.5:ENSCAFT00000018339.4:exon25:c.G2476A:p.D826N,ENSCAFG00000011513.5:ENSCAFT00000045219.3:exon24:c.G2218A:p.D740N,ENSCAFG00000011513.5:ENSCAFT00000085487.1:exon23:c.G2155A:p.D719N,ENSCAFG00000011513.5:ENSCAFT00000063580.1:exon24:c.G2275A:p.D759N,ENS…	ENSCAFG00000011513	ABLIM1	ABLIM1	chr28	25261007	25261007	C	T	deleterious(0.01)	0/1	164,8	0.055	172
22	synonymous SNV	ENSCAFG00000010962.5:ENSCAFT00000017647.5:exon3:c.G462T:p.V154V,	ENSCAFG00000010962	DPYSL4	DPYSL4	chr28	40176655	40176655	G	T	-	0/1	52,5	0.111	57
22	frameshift deletion	ENSCAFG00000008834.4:ENSCAFT00000014049.4:exon13:c.3932_3933del:p.G1311fs,	ENSCAFG00000008834	ZFYVE16	-	chr3	26669438	26669439	CC	-	-	0/1	106,6	0.057	112
22	nonsynonymous SNV	ENSCAFG00000012557.4:ENSCAFT00000019943.4:exon3:c.G34A:p.A12T,ENSCAFG00000012557.4:ENSCAFT00000090408.1:exon3:c.G34A:p.A12T,ENSCAFG00000012557.4:ENSCAFT00000080095.1:exon3:c.G292A:p.A98T,	ENSCAFG00000012557	NCSTN	NCSTN	chr38	21886351	21886351	C	T	tolerated(0.35)	0/1	65,4	0.07	69
22	nonsynonymous SNV	ENSCAFG00000019846.4:ENSCAFT00000031571.4:exon11:c.G1631A:p.R544Q,ENSCAFG00000019846.4:ENSCAFT00000066418.1:exon10:c.G1472A:p.R491Q,	ENSCAFG00000019846	CDH15	CDH15	chr5	64260730	64260730	C	T	tolerated(0.39)	0/1	9,3	0.273	12
22	nonsynonymous SNV	ENSCAFG00000010867.4:ENSCAFT00000060977.1:exon6:c.C626T:p.A209V,ENSCAFG00000010867.4:ENSCAFT00000017631.4:exon6:c.C626T:p.A209V,	ENSCAFG00000010867	-	TYW1B	chr6	1275080	1275080	C	T	deleterious(0.02)	0/1	73,4	0.061	77
22	nonsynonymous SNV	ENSCAFG00000017039.6:ENSCAFT00000065756.1:exon18:c.G3968A:p.R1323H,ENSCAFG00000017039.6:ENSCAFT00000026995.5:exon16:c.G3578A:p.R1193H,ENSCAFG00000017039.6:ENSCAFT00000059942.1:exon17:c.G3239A:p.R1080H,	ENSCAFG00000017039	TAOK2	TAOK2	chr6	18024745	18024745	G	A	deleterious_low_confidence(0)	0/1	23,4	0.149	27
22	nonsynonymous SNV	ENSCAFG00000010570.5:ENSCAFT00000050119.2:exon8:c.C2087G:p.P696R,	ENSCAFG00000010570	-	-	chr7	846916	846916	G	C	deleterious(0)	0/1	49,6	0.125	55
22	nonsynonymous SNV	ENSCAFG00000017640.5:ENSCAFT00000065858.1:exon2:c.C38T:p.A13V,ENSCAFG00000017640.5:ENSCAFT00000044021.3:exon2:c.C38T:p.A13V,ENSCAFG00000017640.5:ENSCAFT00000027972.4:exon2:c.C38T:p.A13V,ENSCAFG00000017640.5:ENSCAFT00000059593.1:exon2:c.C38T:p.A13V,ENSCAFG00000017640.5:ENSCAFT00000076102.1:exon2:c.C38T:p.A13V,ENSCAFG00000017640.5:ENSCAFT00000075158.1:exon2:c.C38T:p.A13V,	ENSCAFG00000017640	HAUS1	HAUS1	chr7	45114550	45114550	G	A	tolerated(0.15)	0/1	68,4	0.085	72
22	nonsynonymous SNV	ENSCAFG00000014603.4:ENSCAFT00000023202.4:exon1:c.G328A:p.V110I,ENSCAFG00000014603.4:ENSCAFT00000090364.1:exon1:c.G328A:p.V110I,ENSCAFG00000014603.4:ENSCAFT00000085496.1:exon1:c.G328A:p.V110I,	ENSCAFG00000014603	TRIM9	TRIM9	chr8	27441118	27441118	C	T	tolerated_low_confidence(0.05)	0/1	25,4	0.15	29
22	nonsynonymous SNV	ENSCAFG00000029371.2:ENSCAFT00000044560.2:exon2:c.G364A:p.G122R,	ENSCAFG00000029371	-	-	chr8	46279976	46279976	C	T	-	0/1	22,3	0.175	25
22	synonymous SNV	ENSCAFG00000017625.5:ENSCAFT00000089070.1:exon7:c.A1170G:p.G390G,ENSCAFG00000017625.5:ENSCAFT00000027962.4:exon8:c.A1302G:p.G434G,ENSCAFG00000017625.5:ENSCAFT00000069396.1:exon7:c.A837G:p.G279G,ENSCAFG00000017625.5:ENSCAFT00000070220.1:exon8:c.A1302G:p.G434G,ENSCAFG00000017625.5:ENSCAFT00000048714.3:exon8:c.A1302G:p.G434G,	ENSCAFG00000017625	DHX4-	DHX4-	chr9	34074691	34074691	A	G	-	0/1	19,4	0.167	23
22	nonsynonymous SNV	ENSCAFG00000017793.4:ENSCAFT00000089094.1:exon28:c.T3457C:p.C1153R,ENSCAFG00000017793.4:ENSCAFT00000080770.1:exon27:c.T3325C:p.C1109R,ENSCAFG00000017793.4:ENSCAFT00000068455.1:exon28:c.T3379C:p.C1127R,ENSCAFG00000017793.4:ENSCAFT00000062856.1:exon26:c.T3295C:p.C1099R,ENSCAFG00000017793.4:ENSCAFT00000028225.4:exon27:c.T3421C:p.C1141R,	ENSCAFG00000017793	USP32	USP6	chr9	36296437	36296437	T	C	deleterious(0)	0/1	38,3	0.107	41
22	nonsynonymous SNV	ENSCAFG00000018642.5:ENSCAFT00000029597.4:exon16:c.C1949T:p.A650V,ENSCAFG00000018642.5:ENSCAFT00000046006.3:exon16:c.C1946T:p.A649V,	ENSCAFG00000018642	NOS2	NOS2	chr9	42183882	42183882	G	A	deleterious(0)	0/1	75,4	0.064	79
22	synonymous SNV	ENSCAFG00000020118.5:ENSCAFT00000032019.4:exon1:c.C18T:p.S6S,	ENSCAFG00000020118	SH2D3C	SH2D3C	chr9	55642612	55642612	C	T	-	0/1	18,3	0.214	21
22	nonsynonymous SNV	ENSCAFG00000017373.4:ENSCAFT00000027526.4:exon3:c.A155G:p.K52R,ENSCAFG00000017373.4:ENSCAFT00000084840.1:exon4:c.A62G:p.K21R,ENSCAFG00000017373.4:ENSCAFT00000061167.1:exon3:c.A155G:p.K52R,ENSCAFG00000017373.4:ENSCAFT00000072012.1:exon3:c.A155G:p.K52R,ENSCAFG00000017373.4:ENSCAFT00000071030.1:exon3:c.A155G:p.K52R,	ENSCAFG00000017373	RPS6KA6	RPS6KA6	chrX	65035228	65035228	T	C	tolerated(0.15)	0/1	26,3	0.156	29
23	nonsynonymous SNV	ENSCAFG00000003938.5:ENSCAFT00000006331.5:exon1:c.G416A:p.R139H,	ENSCAFG00000003938	NTN5	NTN5	chr1	107648089	107648089	G	A	deleterious(0.05)	0/1	70,20	0.231	90
23	nonsynonymous SNV	ENSCAFG00000007499.4:ENSCAFT00000088588.1:exon7:c.G746T:p.R249M,ENSCAFG00000007499.4:ENSCAFT00000079385.1:exon7:c.G746T:p.R249M,ENSCAFG00000007499.4:ENSCAFT00000012014.4:exon7:c.G746T:p.R249M,	ENSCAFG00000007499	SLC7A9	SLC7A9	chr1	119209807	119209807	G	T	deleterious(0)	0/1	19,3	0.175	22
23	synonymous SNV	ENSCAFG00000001550.4:ENSCAFT00000088555.1:exon1:c.C189T:p.Y63Y,ENSCAFG00000001550.4:ENSCAFT00000074712.1:exon1:c.C189T:p.Y63Y,ENSCAFG00000001550.4:ENSCAFT00000078646.1:exon1:c.C189T:p.Y63Y,ENSCAFG00000001550.4:ENSCAFT00000002422.4:exon1:c.C189T:p.Y63Y,	ENSCAFG00000001550	FOXRED2	FOXRED2	chr10	27908817	27908817	C	T	-	0/1	41,13	0.295	54
23	synonymous SNV	ENSCAFG00000003296.5:ENSCAFT00000005292.5:exon14:c.T1248C:p.S416S,ENSCAFG00000003296.5:ENSCAFT00000050027.2:exon13:c.T1194C:p.S398S,	ENSCAFG00000003296	GFPT1	GFPT1	chr10	68082067	68082067	A	G	-	0/1	19,4	0.188	23
23	nonsynonymous SNV	ENSCAFG00000002612.5:ENSCAFT00000081170.1:exon7:c.A606C:p.K202N,ENSCAFG00000002612.5:ENSCAFT00000004108.4:exon6:c.A552C:p.K184N,ENSCAFG00000002612.5:ENSCAFT00000004110.5:exon7:c.A633C:p.K211N,ENSCAFG00000002612.5:ENSCAFT00000065048.1:exon6:c.A552C:p.K184N,ENSCAFG00000002612.5:ENSCAFT00000073837.1:exon5:c.A471C:p.K157N,ENSCAFG00000002612.5:ENSCAFT00000070339.1:exon5:c.A453C:p.K151N,	ENSCAFG00000002612	SMAP1	SMAP1	chr12	33297241	33297241	A	C	tolerated(0.06)	0/1	9,5	0.455	14
23	nonsynonymous SNV	ENSCAFG00000001621.5:ENSCAFT00000002544.5:exon10:c.C1357G:p.Q453E,ENSCAFG00000001621.5:ENSCAFT00000074210.1:exon10:c.C1357G:p.Q453E,	ENSCAFG00000001621	TONSL	TONSL	chr13	37853919	37853919	G	C	tolerated(0.17)	0/1	33,16	0.378	49
23	nonsynonymous SNV	ENSCAFG00000003297.3:ENSCAFT00000005281.3:exon1:c.A1803C:p.K601N,	ENSCAFG00000003297	LRRN3	LRRN3	chr14	50927680	50927680	A	C	tolerated(0.17)	0/1	27,56	0.672	83
23	nonsynonymous SNV	ENSCAFG00000002579.5:ENSCAFT00000004059.4:exon3:c.A767T:p.D256V,ENSCAFG00000002579.5:ENSCAFT00000045204.3:exon4:c.A308T:p.D103V,	ENSCAFG00000002579	EDN2	EDN2	chr15	1651021	1651021	A	T	deleterious(0)	0/1	81,4	0.051	85
23	nonsynonymous SNV	ENSCAFG00000003334.5:ENSCAFT00000005349.5:exon22:c.G9217A:p.V3073I,ENSCAFG00000003334.5:ENSCAFT00000044856.2:exon23:c.G9973A:p.V3325I,	ENSCAFG00000003334	ABCA13	-	chr18	238577	238577	G	A	tolerated(1)	0/1	118,37	0.234	155
23	synonymous SNV	ENSCAFG00000006889.5:ENSCAFT00000081414.1:exon5:c.C687T:p.T229T,ENSCAFG00000006889.5:ENSCAFT00000011070.4:exon5:c.C459T:p.T153T,ENSCAFG00000006889.5:ENSCAFT00000011067.5:exon5:c.C459T:p.T153T,ENSCAFG00000006889.5:ENSCAFT00000074919.1:exon5:c.C738T:p.T246T,ENSCAFG00000006889.5:ENSCAFT00000084950.1:exon5:c.C738T:p.T246T,ENSCAFG00000006889.5:ENSCAFT00000067142.1:exon5:c.C687T:p.T229T,ENSCAFG00000006…	ENSCAFG00000006889	CD44	CD44	chr18	32776462	32776462	G	A	-	0/1	128,18	0.152	146
23	nonsynonymous SNV	ENSCAFG00000003785.5:ENSCAFT00000006093.5:exon1:c.T1585G:p.Y529D,	ENSCAFG00000003785	PCDH1-	PCDH1-	chr19	8730106	8730106	A	C	tolerated(0.22)	0/1	67,47	0.43	114
23	nonsynonymous SNV	ENSCAFG00000005717.5:ENSCAFT00000049028.3:exon102:c.C14889A:p.N4963K,ENSCAFG00000005717.5:ENSCAFT00000009249.5:exon77:c.C12618A:p.N4206K,ENSCAFG00000005717.5:ENSCAFT00000049432.3:exon101:c.C14889A:p.N4963K,	ENSCAFG00000005717	NEB	NEB	chr19	52779117	52779117	G	T	tolerated(1)	0/1	81,5	0.097	86
23	nonsynonymous SNV	ENSCAFG00000004299.4:ENSCAFT00000006929.3:exon3:c.T174A:p.S58R,	ENSCAFG00000004299	GAD2	GAD2	chr2	7449818	7449818	A	T	tolerated_low_confidence(0.5)	0/1	62,17	0.254	79
23	nonsynonymous SNV	ENSCAFG00000004164.4:ENSCAFT00000006668.4:exon1:c.T32C:p.F11S,ENSCAFG00000004164.4:ENSCAFT00000066055.1:exon1:c.T32C:p.F11S,	ENSCAFG00000004164	COMMD3	BMI1	chr2	10833560	10833560	A	G	deleterious(0)	0/1	25,9	0.296	34
23	nonsynonymous SNV	ENSCAFG00000004467.3:ENSCAFT00000007204.3:exon4:c.A509C:p.E170A,	ENSCAFG00000004467	XPC	XPC	chr20	4316843	4316843	T	G	deleterious(0)	0/1	91,7	0.08	98
23	nonsynonymous SNV	ENSCAFG00000005527.4:ENSCAFT00000067434.1:exon14:c.G1756T:p.V586L,	ENSCAFG00000005527	P4HA3	P4HA3	chr21	24032594	24032594	G	T	deleterious_low_confidence(0.03)	0|1	88,5	0.07	93
23	nonsynonymous SNV	ENSCAFG00000005527.4:ENSCAFT00000067434.1:exon14:c.A1759C:p.K587Q,	ENSCAFG00000005527	P4HA3	P4HA3	chr21	24032597	24032597	A	C	tolerated_low_confidence(1)	0|1	86,5	0.071	91
23	nonsynonymous SNV	ENSCAFG00000005251.5:ENSCAFT00000079236.1:exon10:c.A1032G:p.I344M,ENSCAFG00000005251.5:ENSCAFT00000008488.5:exon11:c.A1260G:p.I420M,ENSCAFG00000005251.5:ENSCAFT00000073429.1:exon11:c.A1260G:p.I420M,ENSCAFG00000005251.5:ENSCAFT00000087900.1:exon11:c.A1260G:p.I420M,ENSCAFG00000005251.5:ENSCAFT00000084390.1:exon11:c.A1260G:p.I420M,ENSCAFG00000005251.5:ENSCAFT00000085201.1:exon11:c.A1260G:p.I420M,ENS…	ENSCAFG00000005251	RALGAPA2	RALGAPA2	chr24	2774658	2774658	A	G	deleterious(0.01)	0/1	28,3	0.13	31
23	nonsynonymous SNV	ENSCAFG00000049779.1:ENSCAFT00000064685.1:exon1:c.A98G:p.N33S,	ENSCAFG00000049779	-	-	chr26	25654226	25654226	A	G	-	0|1	103,53	0.339	156
23	stopgain	ENSCAFG00000049779.1:ENSCAFT00000064685.1:exon1:c.C102G:p.Y34X,	ENSCAFG00000049779	-	-	chr26	25654230	25654230	C	G	-	0|1	102,53	0.339	155
23	nonsynonymous SNV	ENSCAFG00000049779.1:ENSCAFT00000064685.1:exon1:c.A278G:p.Y93C,	ENSCAFG00000049779	-	-	chr26	25654406	25654406	A	G	-	0/1	47,25	0.379	72
23	nonsynonymous SNV	ENSCAFG00000006491.4:ENSCAFT00000010510.4:exon17:c.C1681T:p.R561W,	ENSCAFG00000006491	ITGA5	ITGA5	chr27	917484	917484	C	T	deleterious(0)	0/1	43,26	0.367	69
23	synonymous SNV	ENSCAFG00000009672.4:ENSCAFT00000015365.4:exon6:c.T558A:p.S186S,	ENSCAFG00000009672	WNT8B	WNT8B	chr28	13209900	13209900	T	A	-	0/1	62,7	0.111	69
23	nonsynonymous SNV	ENSCAFG00000013204.4:ENSCAFT00000083471.1:exon8:c.G605A:p.R202H,ENSCAFG00000013204.4:ENSCAFT00000080956.1:exon11:c.G782A:p.R261H,ENSCAFG00000013204.4:ENSCAFT00000021005.4:exon11:c.G950A:p.R317H,ENSCAFG00000013204.4:ENSCAFT00000093081.1:exon11:c.G1190A:p.R397H,ENSCAFG00000013204.4:ENSCAFT00000070815.1:exon11:c.G818A:p.R273H,ENSCAFG00000013204.4:ENSCAFT00000062730.1:exon10:c.G989A:p.R330H,ENSCAFG00…	ENSCAFG00000013204	PTPRE	PTPRE	chr28	36884025	36884025	G	A	deleterious(0.04)	0/1	92,58	0.366	150
23	nonsynonymous SNV	ENSCAFG00000007197.5:ENSCAFT00000083452.1:exon23:c.C2093T:p.A698V,ENSCAFG00000007197.5:ENSCAFT00000049007.2:exon24:c.C1985T:p.A662V,ENSCAFG00000007197.5:ENSCAFT00000068373.1:exon23:c.C1985T:p.A662V,ENSCAFG00000007197.5:ENSCAFT00000072957.1:exon22:c.C1955T:p.A652V,ENSCAFG00000007197.5:ENSCAFT00000067567.1:exon21:c.C1937T:p.A646V,ENSCAFG00000007197.5:ENSCAFT00000080932.1:exon24:c.C2138T:p.A713V,ENS…	ENSCAFG00000007197	ASPH	ASPH	chr29	11828213	11828213	G	A	deleterious(0.01)	0/1	69,4	0.075	73
23	nonsynonymous SNV	ENSCAFG00000008302.5:ENSCAFT00000013201.5:exon4:c.T140G:p.I47S,ENSCAFG00000008302.5:ENSCAFT00000074240.1:exon4:c.T140G:p.I47S,ENSCAFG00000008302.5:ENSCAFT00000044684.2:exon4:c.T140G:p.I47S,ENSCAFG00000008302.5:ENSCAFT00000013212.5:exon4:c.T140G:p.I47S,	ENSCAFG00000008302	MEF2C	MEF2C	chr3	19870529	19870529	T	G	deleterious(0)	0/1	39,6	0.166	45
23	nonsynonymous SNV	ENSCAFG00000009720.4:ENSCAFT00000015450.4:exon19:c.T2096C:p.F699S,	ENSCAFG00000009720	CYFIP1	CYFIP1	chr3	32139473	32139473	A	G	deleterious(0)	0/1	35,4	0.116	39
23	synonymous SNV	ENSCAFG00000011917.4:ENSCAFT00000018927.4:exon1:c.C87T:p.A29A,	ENSCAFG00000011917	TMEM62	TMEM62	chr30	10021954	10021954	C	T	-	0/1	3,5	0.667	8
23	nonsynonymous SNV	ENSCAFG00000011039.4:ENSCAFT00000017565.4:exon7:c.G503A:p.R168H,ENSCAFG00000011039.4:ENSCAFT00000068935.1:exon7:c.G494A:p.R165H,ENSCAFG00000011039.4:ENSCAFT00000065034.1:exon5:c.G635A:p.R212H,	ENSCAFG00000011039	ITGB2	ITGB2	chr31	38533078	38533078	C	T	deleterious(0)	0/1	38,5	0.118	43
23	nonsynonymous SNV	ENSCAFG00000009020.4:ENSCAFT00000066751.1:exon8:c.A885C:p.E295D,ENSCAFG00000009020.4:ENSCAFT00000066011.1:exon7:c.A999C:p.E333D,ENSCAFG00000009020.4:ENSCAFT00000014341.4:exon7:c.A999C:p.E333D,	ENSCAFG00000009020	ARL13B	ARL13B	chr33	1749229	1749229	A	C	tolerated(0.13)	0/1	19,4	0.199	23
23	nonsynonymous SNV	ENSCAFG00000014786.5:ENSCAFT00000060181.1:exon7:c.C1948T:p.P650S,ENSCAFG00000014786.5:ENSCAFT00000063461.1:exon8:c.C2026T:p.P676S,ENSCAFG00000014786.5:ENSCAFT00000083230.1:exon9:c.C1648T:p.P550S,ENSCAFG00000014786.5:ENSCAFT00000062622.1:exon8:c.C1732T:p.P578S,ENSCAFG00000014786.5:ENSCAFT00000092183.1:exon7:c.C1927T:p.P643S,ENSCAFG00000014786.5:ENSCAFT00000023476.5:exon8:c.C2026T:p.P676S,ENSCAFG00…	ENSCAFG00000014786	PHC3	PHC3	chr34	34699021	34699021	G	A	deleterious(0)	0/1	68,52	0.408	120
23	synonymous SNV	ENSCAFG00000046600.1:ENSCAFT00000074445.1:exon1:c.G183C:p.A61A,ENSCAFG00000046600.1:ENSCAFT00000075360.1:exon1:c.G183C:p.A61A,	ENSCAFG00000046600	-	H2BC3	chr35	24011365	24011365	C	G	-	0/1	62,47	0.419	109
23	nonsynonymous SNV	ENSCAFG00000011929.4:ENSCAFT00000085700.1:exon8:c.T797A:p.V266D,ENSCAFG00000011929.4:ENSCAFT00000018961.4:exon6:c.T887A:p.V296D,	ENSCAFG00000011929	CLK1	CLK1	chr37	10058438	10058438	A	T	deleterious(0)	0/1	30,16	0.355	46
23	nonsynonymous SNV	ENSCAFG00000012644.5:ENSCAFT00000063054.1:exon15:c.G2113A:p.E705K,ENSCAFG00000012644.5:ENSCAFT00000070886.1:exon15:c.G2113A:p.E705K,ENSCAFG00000012644.5:ENSCAFT00000020205.4:exon13:c.G1576A:p.E526K,ENSCAFG00000012644.5:ENSCAFT00000020215.5:exon15:c.G2113A:p.E705K,ENSCAFG00000012644.5:ENSCAFT00000083113.1:exon15:c.G2113A:p.E705K,	ENSCAFG00000012644	NBEAL1	NBEAL1	chr37	11965390	11965390	G	A	deleterious(0)	0/1	17,14	0.478	31
23	nonsynonymous SNV	ENSCAFG00000014345.5:ENSCAFT00000086532.1:exon2:c.G278A:p.R93H,ENSCAFG00000014345.5:ENSCAFT00000043476.3:exon2:c.G278A:p.R93H,ENSCAFG00000014345.5:ENSCAFT00000060520.1:exon2:c.G278A:p.R93H,ENSCAFG00000014345.5:ENSCAFT00000022799.4:exon2:c.G278A:p.R93H,ENSCAFG00000014345.5:ENSCAFT00000067255.1:exon3:c.G176A:p.R59H,ENSCAFG00000014345.5:ENSCAFT00000062672.1:exon2:c.G278A:p.R93H,ENSCAFG00000014345.5:…	ENSCAFG00000014345	FN1	FN1	chr37	22520992	22520992	C	T	deleterious(0.01)	0/1	48,47	0.508	95
23	synonymous SNV	ENSCAFG00000014957.5:ENSCAFT00000007921.3:exon8:c.C1197T:p.S399S,ENSCAFG00000014957.5:ENSCAFT00000023757.5:exon8:c.C861T:p.S287S,ENSCAFG00000014957.5:ENSCAFT00000060150.1:exon6:c.C879T:p.S293S,ENSCAFG00000014957.5:ENSCAFT00000090153.1:exon6:c.C879T:p.S293S,	ENSCAFG00000014957	PRKAG3	PRKAG3	chr37	25409935	25409935	G	A	-	0/1	46,21	0.333	67
23	nonsynonymous SNV	ENSCAFG00000011665.5:ENSCAFT00000062259.1:exon13:c.C3459G:p.H1153Q,ENSCAFG00000011665.5:ENSCAFT00000088612.1:exon13:c.C3459G:p.H1153Q,ENSCAFG00000011665.5:ENSCAFT00000076745.1:exon13:c.C3459G:p.H1153Q,ENSCAFG00000011665.5:ENSCAFT00000018573.4:exon13:c.C3459G:p.H1153Q,ENSCAFG00000011665.5:ENSCAFT00000049173.3:exon13:c.C3459G:p.H1153Q,	ENSCAFG00000011665	SIPA1L2	SIPA1L2	chr4	7196811	7196811	C	G	tolerated(0.22)	0/1	18,4	0.166	22
23	synonymous SNV	ENSCAFG00000012187.4:ENSCAFT00000080766.1:exon9:c.T2541C:p.P847P,	ENSCAFG00000012187	NLRX1	NLRX1	chr5	14566227	14566227	A	G	-	0/1	94,5	0.063	99
23	synonymous SNV	ENSCAFG00000014061.5:ENSCAFT00000022333.5:exon4:c.T459A:p.A153A,ENSCAFG00000014061.5:ENSCAFT00000022334.5:exon5:c.T525A:p.A175A,ENSCAFG00000014061.5:ENSCAFT00000035298.3:exon4:c.T462A:p.A154A,	ENSCAFG00000014061	DIXDC1	DIXDC1	chr5	21131231	21131231	A	T	-	0|1	58,5	0.106	63
23	synonymous SNV	ENSCAFG00000014888.4:ENSCAFT00000023633.4:exon1:c.A645G:p.E215E,	ENSCAFG00000014888	DDI1	DDI1	chr5	27977105	27977105	T	C	-	0/1	78,45	0.384	123
23	synonymous SNV	ENSCAFG00000017460.5:ENSCAFT00000027662.4:exon25:c.C3357T:p.I1119I,	ENSCAFG00000017460	MYH13	MYH13	chr5	34634352	34634352	G	A	-	0/1	41,26	0.398	67
23	nonsynonymous SNV	ENSCAFG00000018560.4:ENSCAFT00000029521.4:exon7:c.G728A:p.G243D,ENSCAFG00000018560.4:ENSCAFT00000081848.1:exon3:c.G155A:p.G52D,ENSCAFG00000018560.4:ENSCAFT00000074682.1:exon8:c.G749A:p.G250D,ENSCAFG00000018560.4:ENSCAFT00000061417.1:exon8:c.G749A:p.G250D,ENSCAFG00000018560.4:ENSCAFT00000092293.1:exon6:c.G635A:p.G212D,ENSCAFG00000018560.4:ENSCAFT00000079357.1:exon8:c.G749A:p.G250D,ENSCAFG000000185…	ENSCAFG00000018560	MYH11	MYH11	chr6	28101828	28101828	G	A	deleterious(0)	0/1	140,5	0.039	145
23	nonsynonymous SNV	ENSCAFG00000019614.3:ENSCAFT00000070184.1:exon2:c.G112A:p.A38T,ENSCAFG00000019614.3:ENSCAFT00000082925.1:exon2:c.G376A:p.A126T,ENSCAFG00000019614.3:ENSCAFT00000031177.3:exon2:c.G112A:p.A38T,	ENSCAFG00000019614	RPUSD1	RPUSD1	chr6	39814658	39814658	G	A	-	0/1	69,4	0.064	73
23	nonsynonymous SNV	ENSCAFG00000029474.2:ENSCAFT00000046905.2:exon2:c.C310G:p.L104V,ENSCAFG00000029474.2:ENSCAFT00000063186.1:exon3:c.C412G:p.L138V,ENSCAFG00000029474.2:ENSCAFT00000068600.1:exon1:c.C277G:p.L93V,	ENSCAFG00000029474	GADD45A	GADD45A	chr6	77395289	77395289	G	C	deleterious(0.01)	0/1	16,11	0.409	27
23	nonsynonymous SNV	ENSCAFG00000004925.4:ENSCAFT00000066363.1:exon15:c.G1607A:p.G536D,ENSCAFG00000004925.4:ENSCAFT00000062281.1:exon13:c.G1568A:p.G523D,ENSCAFG00000004925.4:ENSCAFT00000007926.4:exon14:c.G1718A:p.G573D,ENSCAFG00000004925.4:ENSCAFT00000070852.1:exon14:c.G1550A:p.G517D,ENSCAFG00000004925.4:ENSCAFT00000081408.1:exon13:c.G1592A:p.G531D,	ENSCAFG00000004925	UNK	UNK	chr9	4773746	4773746	C	T	deleterious(0.01)	0/1	23,4	0.124	27
23	nonsynonymous SNV	ENSCAFG00000013774.4:ENSCAFT00000075933.1:exon1:c.T8C:p.V3A,ENSCAFG00000013774.4:ENSCAFT00000021854.4:exon1:c.T8C:p.V3A,ENSCAFG00000013774.4:ENSCAFT00000088008.1:exon1:c.T8C:p.V3A,	ENSCAFG00000013774	MAP3K14	MAP3K14	chr9	18280225	18280225	T	C	deleterious_low_confidence(0)	0/1	51,19	0.305	70
23	nonsynonymous SNV	ENSCAFG00000013774.4:ENSCAFT00000075933.1:exon1:c.C200A:p.A67D,ENSCAFG00000013774.4:ENSCAFT00000021854.4:exon1:c.C200A:p.A67D,ENSCAFG00000013774.4:ENSCAFT00000088008.1:exon1:c.C200A:p.A67D,	ENSCAFG00000013774	MAP3K14	MAP3K14	chr9	18280417	18280417	C	A	deleterious(0)	0/1	47,51	0.551	98
23	nonsynonymous SNV	ENSCAFG00000016310.4:ENSCAFT00000079916.1:exon5:c.A355C:p.N119H,ENSCAFG00000016310.4:ENSCAFT00000068511.1:exon6:c.A616C:p.N206H,ENSCAFG00000016310.4:ENSCAFT00000073287.1:exon6:c.A682C:p.N228H,ENSCAFG00000016310.4:ENSCAFT00000070508.1:exon5:c.A499C:p.N167H,ENSCAFG00000016310.4:ENSCAFT00000072838.1:exon6:c.A523C:p.N175H,ENSCAFG00000016310.4:ENSCAFT00000025865.4:exon7:c.A784C:p.N262H,ENSCAFG00000016…	ENSCAFG00000016310	IKZF3	IKZF3	chr9	22715406	22715406	A	C	deleterious(0)	0/1	49,6	0.184	55
23	stopgain	ENSCAFG00000016407.4:ENSCAFT00000026005.4:exon1:c.C655T:p.Q219X,	ENSCAFG00000016407	NEUROD2	NEUROD2	chr9	22866866	22866866	C	T	-	0/1	40,16	0.314	56
23	nonsynonymous SNV	ENSCAFG00000017703.4:ENSCAFT00000093729.1:exon26:c.C5996T:p.P1999L,ENSCAFG00000017703.4:ENSCAFT00000028083.4:exon26:c.C5996T:p.P1999L,	ENSCAFG00000017703	MED13	MED13	chr9	34733014	34733014	C	T	tolerated(0.14)	0/1	30,27	0.415	57
23	nonsynonymous SNV	ENSCAFG00000018498.4:ENSCAFT00000029373.4:exon13:c.G1531A:p.G511R,ENSCAFG00000018498.4:ENSCAFT00000083091.1:exon12:c.G1462A:p.G488R,	ENSCAFG00000018498	SUZ12	SUZ12	chr9	41000247	41000247	C	T	deleterious(0)	0/1	39,31	0.473	70
23	nonsynonymous SNV	ENSCAFG00000019295.5:ENSCAFT00000030644.5:exon5:c.G1523A:p.R508H,	ENSCAFG00000019295	MNT	MNT	chr9	46470380	46470380	C	T	deleterious_low_confidence(0)	0/1	92,4	0.044	96
23	nonsynonymous SNV	ENSCAFG00000032680.1:ENSCAFT00000030694.3:exon1:c.A25G:p.R9G,	ENSCAFG00000032680	OR3A1-	-	chr9	47248940	47248940	A	G	tolerated(0.5)	0/1	212,6	0.027	218
23	synonymous SNV	ENSCAFG00000016018.4:ENSCAFT00000025414.4:exon26:c.C2877T:p.C959C,ENSCAFG00000016018.4:ENSCAFT00000061685.1:exon23:c.C2796T:p.C932C,ENSCAFG00000016018.4:ENSCAFT00000077949.1:exon25:c.C3249T:p.C1083C,	ENSCAFG00000016018	DGKK	DGKK	chrX	43053524	43053524	G	A	-	0/1	16,3	0.202	19
23	synonymous SNV	ENSCAFG00000017859.4:ENSCAFT00000028337.4:exon2:c.A135G:p.A45A,	ENSCAFG00000017859	IL1RAPL2	IL1RAPL2	chrX	78654595	78654595	A	G	-	0/1	14,18	0.583	32
24	nonsynonymous SNV	ENSCAFG00000000720.4:ENSCAFT00000001128.4:exon1:c.A1G:p.M1V,	ENSCAFG00000000720	ACAT2	ACAT2	chr1	49011769	49011769	A	G	-	0/1	14,4	0.188	18
24	nonsynonymous SNV	ENSCAFG00000004376.4:ENSCAFT00000007040.4:exon23:c.A2969G:p.E990G,	ENSCAFG00000004376	SYMPK	SYMPK	chr1	109793237	109793237	A	G	deleterious(0)	0/1	67,4	0.059	71
24	nonsynonymous SNV	ENSCAFG00000005014.5:ENSCAFT00000008059.3:exon4:c.T656A:p.L219H,ENSCAFG00000005014.5:ENSCAFT00000037002.4:exon6:c.T542A:p.L181H,	ENSCAFG00000005014	TGFB1	TGFB1	chr1	112636655	112636655	T	A	deleterious(0)	0/1	35,6	0.129	41
24	synonymous SNV	ENSCAFG00000001727.3:ENSCAFT00000002705.3:exon1:c.G1497A:p.T499T,	ENSCAFG00000001727	LINGO2	LINGO2	chr11	45998573	45998573	C	T	-	0/1	188,35	0.169	223
24	nonsynonymous SNV	ENSCAFG00000000575.5:ENSCAFT00000000906.4:exon10:c.C1289T:p.A430V,ENSCAFG00000000575.5:ENSCAFT00000088635.1:exon10:c.C1289T:p.A430V,ENSCAFG00000000575.5:ENSCAFT00000043742.3:exon9:c.C1235T:p.A412V,	ENSCAFG00000000575	BAG6	BAG6	chr12	1132368	1132368	G	A	deleterious(0.03)	0/1	27,3	0.13	30
24	nonsynonymous SNV	ENSCAFG00000001202.4:ENSCAFT00000001868.4:exon4:c.C887T:p.A296V,	ENSCAFG00000001202	GRM4	GRM4	chr12	3378230	3378230	G	A	deleterious(0.03)	0/1	71,18	0.212	89
24	synonymous SNV	ENSCAFG00000002702.5:ENSCAFT00000080483.1:exon11:c.T1977C:p.V659V,ENSCAFG00000002702.5:ENSCAFT00000049283.3:exon11:c.T1977C:p.V659V,ENSCAFG00000002702.5:ENSCAFT00000061257.1:exon11:c.T1977C:p.V659V,ENSCAFG00000002702.5:ENSCAFT00000004271.4:exon11:c.T1977C:p.V659V,	ENSCAFG00000002702	COL12A1	COL12A1	chr12	36816940	36816940	A	G	-	0/1	50,6	0.089	56
24	synonymous SNV	ENSCAFG00000003804.4:ENSCAFT00000038030.3:exon6:c.A738G:p.G246G,ENSCAFG00000003804.4:ENSCAFT00000043391.2:exon10:c.A1341G:p.G447G,ENSCAFG00000003804.4:ENSCAFT00000069267.1:exon10:c.A1326G:p.G442G,	ENSCAFG00000003804	-	-	chr12	66262712	66262712	A	G	-	0/1	51,4	0.075	55
24	nonsynonymous SNV	ENSCAFG00000001086.4:ENSCAFT00000001656.4:exon2:c.C476T:p.S159L,	ENSCAFG00000001086	MYC	MYC	chr13	25203303	25203303	C	T	deleterious(0)	0/1	38,37	0.569	75
24	synonymous SNV	ENSCAFG00000044133.1:ENSCAFT00000079228.1:exon1:c.C7734T:p.I2578I,	ENSCAFG00000044133	-	EPPK1	chr13	37402821	37402821	G	A	-	0/1	31,7	0.25	38
24	synonymous SNV	ENSCAFG00000024975.2:ENSCAFT00000038652.2:exon4:c.C840T:p.N280N,	ENSCAFG00000024975	GRXCR1	GRXCR1	chr13	39881969	39881969	C	T	-	0/1	65,18	0.234	83
24	nonsynonymous SNV	ENSCAFG00000002714.5:ENSCAFT00000004350.4:exon12:c.T1904C:p.L635S,	ENSCAFG00000002714	EPHA5	EPHA5	chr13	56096965	56096965	A	G	deleterious(0)	0/1	74,72	0.473	146
24	synonymous SNV	ENSCAFG00000001426.4:ENSCAFT00000068161.1:exon14:c.A1332C:p.P444P,ENSCAFG00000001426.4:ENSCAFT00000093288.1:exon14:c.A1332C:p.P444P,ENSCAFG00000001426.4:ENSCAFT00000071327.1:exon19:c.A2046C:p.P682P,ENSCAFG00000001426.4:ENSCAFT00000002234.4:exon20:c.A2133C:p.P711P,ENSCAFG00000001426.4:ENSCAFT00000082970.1:exon19:c.A1926C:p.P642P,ENSCAFG00000001426.4:ENSCAFT00000060686.1:exon20:c.A1539C:p.P513P,	ENSCAFG00000001426	COPG2	COPG2	chr14	6418985	6418985	A	C	-	0/1	12,4	0.201	16
24	synonymous SNV	ENSCAFG00000001611.5:ENSCAFT00000078002.1:exon6:c.C666T:p.S222S,ENSCAFG00000001611.5:ENSCAFT00000092796.1:exon6:c.C942T:p.S314S,ENSCAFG00000001611.5:ENSCAFT00000002526.3:exon7:c.C1239T:p.S413S,ENSCAFG00000001611.5:ENSCAFT00000002528.5:exon7:c.C981T:p.S327S,	ENSCAFG00000001611	IRF5	IRF5	chr14	7725721	7725721	G	A	-	0/1	52,4	0.085	56
24	stopgain	ENSCAFG00000001754.4:ENSCAFT00000002746.4:exon10:c.G993A:p.W331X,ENSCAFG00000001754.4:ENSCAFT00000062245.1:exon11:c.G909A:p.W303X,ENSCAFG00000001754.4:ENSCAFT00000080986.1:exon5:c.G159A:p.W53X,ENSCAFG00000001754.4:ENSCAFT00000082826.1:exon7:c.G828A:p.W276X,ENSCAFG00000001754.4:ENSCAFT00000086242.1:exon6:c.G612A:p.W204X,	ENSCAFG00000001754	POT1	POT1	chr14	11037778	11037778	G	A	-	0/1	24,27	0.5	51
24	nonsynonymous SNV	ENSCAFG00000008141.5:ENSCAFT00000074984.1:exon11:c.G1712A:p.R571Q,ENSCAFG00000008141.5:ENSCAFT00000012962.5:exon11:c.G2207A:p.R736Q,ENSCAFG00000008141.5:ENSCAFT00000065773.1:exon11:c.G1826A:p.R609Q,	ENSCAFG00000008141	FBXW7	FBXW7	chr15	50189359	50189359	C	T	deleterious(0.01)	0/1	117,66	0.355	183
24	nonsynonymous SNV	ENSCAFG00000005180.6:ENSCAFT00000043341.3:exon3:c.G862T:p.D288Y,ENSCAFG00000005180.6:ENSCAFT00000008348.5:exon3:c.G862T:p.D288Y,	ENSCAFG00000005180	SLC4A1AP	SLC4A1AP	chr17	21692936	21692936	G	T	deleterious(0)	0/1	40,4	0.096	44
24	nonsynonymous SNV	ENSCAFG00000005348.4:ENSCAFT00000008624.4:exon1:c.C103T:p.P35S,	ENSCAFG00000005348	EHD3	EHD3	chr17	24828474	24828474	C	T	deleterious(0.01)	0/1	31,44	0.574	75
24	nonsynonymous SNV	ENSCAFG00000008827.5:ENSCAFT00000060449.1:exon2:c.A370G:p.S124G,ENSCAFG00000008827.5:ENSCAFT00000047622.2:exon2:c.A370G:p.S124G,ENSCAFG00000008827.5:ENSCAFT00000014029.5:exon2:c.A370G:p.S124G,	ENSCAFG00000008827	ALMS1	ALMS1	chr17	49488619	49488619	T	C	-	0/1	48,5	0.1	53
24	nonsynonymous SNV	ENSCAFG00000004262.4:ENSCAFT00000087162.1:exon14:c.G1603A:p.V535I,ENSCAFG00000004262.4:ENSCAFT00000073260.1:exon14:c.G1603A:p.V535I,ENSCAFG00000004262.4:ENSCAFT00000006850.4:exon14:c.G1603A:p.V535I,ENSCAFG00000004262.4:ENSCAFT00000067476.1:exon17:c.G1873A:p.V625I,	ENSCAFG00000004262	FBXL13	FBXL13	chr18	17164144	17164144	G	A	tolerated(1)	0/1	21,3	0.15	24
24	nonsynonymous SNV	ENSCAFG00000036621.2:ENSCAFT00000053446.2:exon2:c.G416A:p.R139Q,	ENSCAFG00000036621	-	-	chr18	46861236	46861236	C	T	-	0/1	25,3	0.13	28
24	nonsynonymous SNV	ENSCAFG00000004299.4:ENSCAFT00000006929.3:exon10:c.G1048A:p.V350I,	ENSCAFG00000004299	GAD2	GAD2	chr2	7393756	7393756	C	T	tolerated(1)	0/1	20,4	0.15	24
24	synonymous SNV	ENSCAFG00000008274.5:ENSCAFT00000013139.4:exon6:c.C933T:p.S311S,ENSCAFG00000008274.5:ENSCAFT00000064782.1:exon6:c.C933T:p.S311S,ENSCAFG00000008274.5:ENSCAFT00000013142.5:exon6:c.C933T:p.S311S,ENSCAFG00000008274.5:ENSCAFT00000061496.1:exon6:c.C933T:p.S311S,ENSCAFG00000008274.5:ENSCAFT00000071513.1:exon6:c.C933T:p.S311S,ENSCAFG00000008274.5:ENSCAFT00000080847.1:exon6:c.C933T:p.S311S,ENSCAFG00000008…	ENSCAFG00000008274	ARHGEF28	ARHGEF28	chr2	56560594	56560594	C	T	-	0/1	16,3	0.2	19
24	nonsynonymous SNV	ENSCAFG00000010060.5:ENSCAFT00000015997.4:exon11:c.C977T:p.S326F,	ENSCAFG00000010060	RRP9	RRP9	chr20	37782557	37782557	C	T	deleterious(0)	0/1	56,42	0.44	98
24	stopgain	ENSCAFG00000013392.4:ENSCAFT00000060515.1:exon3:c.C1354T:p.R452X,ENSCAFG00000013392.4:ENSCAFT00000021260.4:exon3:c.C1354T:p.R452X,ENSCAFG00000013392.4:ENSCAFT00000064752.1:exon3:c.C1354T:p.R452X,ENSCAFG00000013392.4:ENSCAFT00000072365.1:exon3:c.C1354T:p.R452X,ENSCAFG00000013392.4:ENSCAFT00000077709.1:exon3:c.C1354T:p.R452X,ENSCAFG00000013392.4:ENSCAFT00000071377.1:exon3:c.C1354T:p.R452X,ENSCAFG00…	ENSCAFG00000013392	SETD2	SETD2	chr20	41711064	41711064	C	T	-	0/1	53,22	0.305	75
24	nonsynonymous SNV	ENSCAFG00000017111.4:ENSCAFT00000027101.4:exon3:c.G964T:p.G322C,	ENSCAFG00000017111	KLF1	KLF1	chr20	49298032	49298032	G	T	deleterious(0)	0/1	42,12	0.2	54
24	synonymous SNV	ENSCAFG00000008607.4:ENSCAFT00000060281.1:exon2:c.C45T:p.S15S,ENSCAFG00000008607.4:ENSCAFT00000075756.1:exon2:c.C45T:p.S15S,ENSCAFG00000008607.4:ENSCAFT00000062113.1:exon2:c.C144T:p.S48S,	ENSCAFG00000008607	SOX6	SOX6	chr21	39095086	39095086	G	A	-	0/1	68,22	0.288	90
24	nonsynonymous SNV	ENSCAFG00000009178.6:ENSCAFT00000014593.5:exon4:c.C1034T:p.A345V,	ENSCAFG00000009178	EMILIN3	EMILIN3	chr24	29362329	29362329	G	A	deleterious(0.04)	0/1	13,5	0.333	18
24	nonsynonymous SNV	ENSCAFG00000012226.5:ENSCAFT00000019420.5:exon42:c.G9118A:p.A3040T,ENSCAFG00000012226.5:ENSCAFT00000019426.4:exon39:c.G7297A:p.A2433T,ENSCAFG00000012226.5:ENSCAFT00000084677.1:exon41:c.G8500A:p.A2834T,ENSCAFG00000012226.5:ENSCAFT00000085717.1:exon39:c.G7294A:p.A2432T,ENSCAFG00000012226.5:ENSCAFT00000019411.5:exon40:c.G9136A:p.A3046T,	ENSCAFG00000012226	COL6A3	COL6A3	chr25	47982998	47982998	C	T	tolerated(0.1)	0/1	85,15	0.132	100
24	synonymous SNV	ENSCAFG00000008745.4:ENSCAFT00000013864.4:exon3:c.T267A:p.A89A,	ENSCAFG00000008745	MAPKAPK5	ALDH2	chr26	9338145	9338145	T	A	-	0|1	90,4	0.055	94
24	nonsynonymous SNV	ENSCAFG00000008907.5:ENSCAFT00000046714.2:exon1:c.C485T:p.A162V,ENSCAFG00000008907.5:ENSCAFT00000044433.3:exon2:c.C1025T:p.A342V,ENSCAFG00000008907.5:ENSCAFT00000014138.5:exon1:c.C485T:p.A162V,	ENSCAFG00000008907	ADCY6	ADCY6	chr27	5740003	5740003	C	T	tolerated(0.4)	0/1	11,11	0.524	22
24	nonsynonymous SNV	ENSCAFG00000015642.3:ENSCAFT00000024793.2:exon6:c.G1075A:p.V359M,ENSCAFG00000015642.3:ENSCAFT00000072487.1:exon5:c.G1012A:p.V338M,	ENSCAFG00000015642	FOXM1	FOXM1	chr27	41900512	41900512	G	A	tolerated(0.35)	0/1	43,5	0.102	48
24	synonymous SNV	ENSCAFG00000015750.5:ENSCAFT00000024958.5:exon4:c.C1836T:p.A612A,ENSCAFG00000015750.5:ENSCAFT00000078993.1:exon4:c.C900T:p.A300A,	ENSCAFG00000015750	IQSEC3	IQSEC3	chr27	42218861	42218861	C	T	-	0/1	15,26	0.595	41
24	nonsynonymous SNV	ENSCAFG00000011376.5:ENSCAFT00000064479.1:exon3:c.C440T:p.A147V,ENSCAFG00000011376.5:ENSCAFT00000018095.5:exon3:c.C440T:p.A147V,ENSCAFG00000011376.5:ENSCAFT00000018087.5:exon3:c.C440T:p.A147V,	ENSCAFG00000011376	AKAP13	AKAP13	chr3	49125718	49125718	C	T	deleterious(0.01)	0/1	92,4	0.055	96
24	nonsynonymous SNV	ENSCAFG00000014546.4:ENSCAFT00000023096.4:exon9:c.C1010T:p.A337V,	ENSCAFG00000014546	HTRA3	HTRA3	chr3	60110762	60110762	C	T	tolerated(0.96)	0/1	40,10	0.238	50
24	nonsynonymous SNV	ENSCAFG00000016905.4:ENSCAFT00000076300.1:exon35:c.A4702G:p.K1568E,ENSCAFG00000016905.4:ENSCAFT00000076749.1:exon35:c.A4681G:p.K1561E,ENSCAFG00000016905.4:ENSCAFT00000026798.4:exon36:c.A4816G:p.K1606E,ENSCAFG00000016905.4:ENSCAFT00000083609.1:exon35:c.A4696G:p.K1566E,ENSCAFG00000016905.4:ENSCAFT00000067874.1:exon36:c.A4816G:p.K1606E,ENSCAFG00000016905.4:ENSCAFT00000065049.1:exon36:c.A4816G:p.K160…	ENSCAFG00000016905	TLN2	TLN2	chr30	27366766	27366766	A	G	deleterious(0.01)	0|1	36,2	0.091	38
24	nonsynonymous SNV	ENSCAFG00000010531.4:ENSCAFT00000016724.4:exon2:c.T56A:p.I19N,	ENSCAFG00000010531	C32H4orf17	C4orf17	chr32	21515479	21515479	T	A	tolerated(0.22)	0|1	91,4	0.055	95
24	nonsynonymous SNV	ENSCAFG00000011983.5:ENSCAFT00000019031.4:exon6:c.T818A:p.I273N,ENSCAFG00000011983.5:ENSCAFT00000048631.3:exon6:c.T818A:p.I273N,	ENSCAFG00000011983	HSPBAP1	HSPBAP1	chr33	25812839	25812839	A	T	deleterious(0)	0/1	14,20	0.519	34
24	nonsynonymous SNV	ENSCAFG00000012119.5:ENSCAFT00000081521.1:exon13:c.G2003T:p.G668V,ENSCAFG00000012119.5:ENSCAFT00000090690.1:exon14:c.G2042T:p.G681V,ENSCAFG00000012119.5:ENSCAFT00000073610.1:exon13:c.G2042T:p.G681V,ENSCAFG00000012119.5:ENSCAFT00000019353.5:exon14:c.G2177T:p.G726V,ENSCAFG00000012119.5:ENSCAFT00000085465.1:exon14:c.G2177T:p.G726V,	ENSCAFG00000012119	MYLK	MYLK	chr33	26752792	26752792	C	A	deleterious(0)	0/1	19,8	0.307	27
24	nonsynonymous SNV	ENSCAFG00000015543.5:ENSCAFT00000024648.5:exon10:c.T921A:p.H307Q,	ENSCAFG00000015543	TBL1XR1	TBL1XR1	chr34	40594369	40594369	A	T	deleterious(0)	0/1	54,38	0.439	92
24	nonsynonymous SNV	ENSCAFG00000009901.6:ENSCAFT00000046245.3:exon18:c.G2219A:p.R740H,ENSCAFG00000009901.6:ENSCAFT00000064469.1:exon17:c.G2168A:p.R723H,ENSCAFG00000009901.6:ENSCAFT00000071060.1:exon18:c.G2219A:p.R740H,ENSCAFG00000009901.6:ENSCAFT00000015800.5:exon17:c.G2168A:p.R723H,ENSCAFG00000009901.6:ENSCAFT00000049341.2:exon18:c.G2219A:p.R740H,ENSCAFG00000009901.6:ENSCAFT00000062140.1:exon18:c.G2219A:p.R740H,ENS…	ENSCAFG00000009901	NFASC	NFASC	chr38	1506292	1506292	G	A	tolerated(0.18)	0/1	92,7	0.068	99
24	stopgain	ENSCAFG00000018334.6:ENSCAFT00000063799.1:exon12:c.G3093A:p.W1031X,ENSCAFG00000018334.6:ENSCAFT00000078307.1:exon12:c.G3069A:p.W1023X,ENSCAFG00000018334.6:ENSCAFT00000029130.4:exon13:c.G3135A:p.W1045X,ENSCAFG00000018334.6:ENSCAFT00000049435.2:exon13:c.G3108A:p.W1036X,	ENSCAFG00000018334	SH3TC2	SH3TC2	chr4	59893869	59893869	G	A	-	0/1	74,4	0.068	78
24	nonsynonymous SNV	ENSCAFG00000015063.2:ENSCAFT00000023908.2:exon5:c.C686T:p.S229L,ENSCAFG00000015063.2:ENSCAFT00000069421.1:exon5:c.C686T:p.S229L,	ENSCAFG00000015063	MMP3	MMP3	chr5	28952927	28952927	C	T	deleterious(0)	0/1	52,30	0.387	82
24	nonsynonymous SNV	ENSCAFG00000019735.4:ENSCAFT00000086434.1:exon23:c.C3104T:p.A1035V,	ENSCAFG00000019735	PIK3CD	PIK3CD	chr5	62935456	62935456	C	T	tolerated(0.08)	0/1	102,16	0.142	118
24	nonsynonymous SNV	ENSCAFG00000020184.4:ENSCAFT00000032144.4:exon3:c.C128A:p.P43H,	ENSCAFG00000020184	CHST4	CHST4	chr5	77338483	77338483	C	A	tolerated(0.14)	0|1	124,6	0.06	130
24	nonsynonymous SNV	ENSCAFG00000020184.4:ENSCAFT00000032144.4:exon3:c.T137G:p.V46G,	ENSCAFG00000020184	CHST4	CHST4	chr5	77338492	77338492	T	G	deleterious(0)	0|1	123,6	0.061	129
24	nonsynonymous SNV	ENSCAFG00000020385.4:ENSCAFT00000075653.1:exon4:c.T512A:p.L171Q,ENSCAFG00000020385.4:ENSCAFT00000032466.4:exon4:c.T512A:p.L171Q,	ENSCAFG00000020385	C5H16orf7-	C16orf7-	chr5	82233021	82233021	A	T	deleterious(0)	0|1	28,3	0.13	31
24	frameshift deletion	ENSCAFG00000011265.5:ENSCAFT00000060642.1:exon25:c.2574delA:p.S858fs,ENSCAFG00000011265.5:ENSCAFT00000064494.1:exon27:c.2847delA:p.S949fs,ENSCAFG00000011265.5:ENSCAFT00000068442.1:exon26:c.2715delA:p.S905fs,ENSCAFG00000011265.5:ENSCAFT00000091845.1:exon23:c.3270delA:p.S1090fs,ENSCAFG00000011265.5:ENSCAFT00000017964.5:exon28:c.3039delA:p.S1013fs,ENSCAFG00000011265.5:ENSCAFT00000017955.4:exon28:c.3…	ENSCAFG00000011265	PTPRC	PTPRC	chr7	4163767	4163767	T	-	-	0/1	40,8	0.171	48
24	nonsynonymous SNV	ENSCAFG00000017725.4:ENSCAFT00000065418.1:exon7:c.A746G:p.Y249C,ENSCAFG00000017725.4:ENSCAFT00000028126.4:exon7:c.A746G:p.Y249C,ENSCAFG00000017725.4:ENSCAFT00000077190.1:exon6:c.A707G:p.Y236C,ENSCAFG00000017725.4:ENSCAFT00000083796.1:exon5:c.A518G:p.Y173C,ENSCAFG00000017725.4:ENSCAFT00000082774.1:exon7:c.A746G:p.Y249C,	ENSCAFG00000017725	PIK3C3	PIK3C3	chr7	48757929	48757929	T	C	tolerated(0.05)	0/1	23,3	0.143	26
24	synonymous SNV	ENSCAFG00000012049.5:ENSCAFT00000019136.5:exon3:c.C286T:p.L96L,	ENSCAFG00000012049	IPO4	IPO4	chr8	4179671	4179671	G	A	-	0/1	44,4	0.076	48
24	frameshift insertion	ENSCAFG00000018075.4:ENSCAFT00000028719.4:exon7:c.682_683insCC:p.A228fs,	ENSCAFG00000018075	TRAF3	TRAF3	chr8	70776843	70776843	-	CC	-	0/1	60,20	0.275	80
24	stopgain	ENSCAFG00000018075.4:ENSCAFT00000028719.4:exon10:c.G1087T:p.E363X,ENSCAFG00000018075.4:ENSCAFT00000085506.1:exon7:c.G838T:p.E280X,ENSCAFG00000018075.4:ENSCAFT00000086511.1:exon9:c.G1012T:p.E338X,	ENSCAFG00000018075	TRAF3	TRAF3	chr8	70788134	70788134	G	T	-	0/1	11,5	0.333	16
24	stopgain	ENSCAFG00000018075.4:ENSCAFT00000028719.4:exon11:c.C1267T:p.R423X,ENSCAFG00000018075.4:ENSCAFT00000085506.1:exon8:c.C1018T:p.R340X,ENSCAFG00000018075.4:ENSCAFT00000086511.1:exon10:c.C1192T:p.R398X,	ENSCAFG00000018075	TRAF3	TRAF3	chr8	70789205	70789205	C	T	-	0/1	45,10	0.227	55
24	nonsynonymous SNV	ENSCAFG00000046771.1:ENSCAFT00000077325.1:exon2:c.C97T:p.P33S,	ENSCAFG00000046771	-	IGHV4-4	chr8	73028666	73028666	G	A	deleterious(0)	0/1	15,12	0.435	27
24	nonsynonymous SNV	ENSCAFG00000046771.1:ENSCAFT00000077325.1:exon1:c.G34A:p.A12T,	ENSCAFG00000046771	-	IGHV4-4	chr8	73028810	73028810	C	T	tolerated(0.33)	0/1	6,21	0.784	27
24	synonymous SNV	ENSCAFG00000019260.4:ENSCAFT00000030579.4:exon19:c.G4140A:p.V1380V,	ENSCAFG00000019260	SMG6	SMG6	chr9	46164723	46164723	C	T	-	0/1	51,5	0.089	56
25	nonsynonymous SNV	ENSCAFG00000000860.6:ENSCAFT00000066236.1:exon29:c.G4562A:p.R1521H,ENSCAFG00000000860.6:ENSCAFT00000047722.3:exon28:c.G4517A:p.R1506H,ENSCAFG00000000860.6:ENSCAFT00000069119.1:exon28:c.G4541A:p.R1514H,ENSCAFG00000000860.6:ENSCAFT00000068310.1:exon28:c.G4541A:p.R1514H,ENSCAFG00000000860.6:ENSCAFT00000001341.5:exon29:c.G4562A:p.R1521H,ENSCAFG00000000860.6:ENSCAFT00000079765.1:exon28:c.G4367A:p.R145…	ENSCAFG00000000860	AFDN	AFDN	chr1	55517574	55517574	G	A	-	0/1	22,16	0.414	38
25	frameshift deletion	ENSCAFG00000002564.5:ENSCAFT00000004037.5:exon2:c.514_515del:p.Q172fs,	ENSCAFG00000002564	ZNF865	ZNF865	chr1	102124664	102124665	TG	-	-	0/1	9,6	0.4	15
25	synonymous SNV	ENSCAFG00000002924.5:ENSCAFT00000045850.2:exon4:c.C438T:p.Y146Y,	ENSCAFG00000002924	SHANK1	SHANK1	chr1	106102472	106102472	C	T	-	0/1	67,19	0.218	86
25	nonsynonymous SNV	ENSCAFG00000004190.5:ENSCAFT00000080295.1:exon1:c.A2114G:p.K705R,ENSCAFG00000004190.5:ENSCAFT00000085119.1:exon1:c.A2114G:p.K705R,ENSCAFG00000004190.5:ENSCAFT00000006727.4:exon1:c.A2114G:p.K705R,ENSCAFG00000004190.5:ENSCAFT00000080599.1:exon1:c.A2114G:p.K705R,ENSCAFG00000004190.5:ENSCAFT00000049532.3:exon1:c.A2114G:p.K705R,ENSCAFG00000004190.5:ENSCAFT00000065482.1:exon1:c.A2114G:p.K705R,	ENSCAFG00000004190	ARHGAP35	ARHGAP35	chr1	109032023	109032023	T	C	tolerated(0.12)	0/1	90,28	0.253	118
25	stopgain	ENSCAFG00000004858.4:ENSCAFT00000082880.1:exon1:c.C355T:p.R119X,	ENSCAFG00000004858	CIC	CIC	chr1	112104728	112104728	G	A	-	0/1	27,50	0.667	77
25	nonsynonymous SNV	ENSCAFG00000000121.4:ENSCAFT00000000201.4:exon24:c.C2504T:p.T835M,ENSCAFG00000000121.4:ENSCAFT00000078420.1:exon23:c.C2405T:p.T802M,	ENSCAFG00000000121	STAT2	STAT2	chr10	642749	642749	G	A	tolerated_low_confidence(0.21)	0/1	82,6	0.114	88
25	nonsynonymous SNV	ENSCAFG00000000136.4:ENSCAFT00000068278.1:exon6:c.C385A:p.Q129K,	ENSCAFG00000000136	ATP5F1B	ATP5F1B	chr10	889842	889842	G	T	deleterious_low_confidence(0.03)	0/1	62,4	0.062	66
25	nonsynonymous SNV	ENSCAFG00000000861.4:ENSCAFT00000062595.1:exon12:c.C742T:p.R248W,ENSCAFG00000000861.4:ENSCAFT00000068174.1:exon11:c.C1117T:p.R373W,	ENSCAFG00000000861	PHF21B	PHF21B	chr10	21064208	21064208	C	T	deleterious(0)	0/1	25,4	0.143	29
25	synonymous SNV	ENSCAFG00000002147.4:ENSCAFT00000060467.1:exon1:c.C63T:p.D21D,	ENSCAFG00000002147	IL1R1	IL1R1	chr10	40861070	40861070	G	A	-	0/1	117,33	0.231	150
25	nonsynonymous SNV	ENSCAFG00000001608.3:ENSCAFT00000002523.3:exon2:c.C212A:p.T71N,	ENSCAFG00000001608	-	RPS19	chr11	39042736	39042736	G	T	tolerated_low_confidence(0.06)	0/1	76,8	0.086	84
25	nonsynonymous SNV	ENSCAFG00000002799.3:ENSCAFT00000004471.3:exon1:c.C79A:p.H27N,	ENSCAFG00000002799	ACTL7B	ACTL7B	chr11	64029379	64029379	G	T	-	0/1	26,3	0.131	29
25	nonsynonymous SNV	ENSCAFG00000003282.5:ENSCAFT00000088673.1:exon3:c.A68G:p.E23G,ENSCAFG00000003282.5:ENSCAFT00000074461.1:exon3:c.A68G:p.E23G,ENSCAFG00000003282.5:ENSCAFT00000005268.4:exon3:c.A275G:p.E92G,ENSCAFG00000003282.5:ENSCAFT00000065718.1:exon3:c.A68G:p.E23G,ENSCAFG00000003282.5:ENSCAFT00000081522.1:exon3:c.A68G:p.E23G,ENSCAFG00000003282.5:ENSCAFT00000068751.1:exon3:c.A245G:p.E82G,ENSCAFG00000003282.5:ENSC…	ENSCAFG00000003282	ZNF618	ZNF618	chr11	68272440	68272440	A	G	tolerated_low_confidence(0.11)	0/1	51,5	0.097	56
25	synonymous SNV	ENSCAFG00000001411.6:ENSCAFT00000002183.6:exon4:c.G567A:p.A189A,	ENSCAFG00000001411	STK38	STK38	chr12	5617238	5617238	C	T	-	0/1	92,9	0.092	101
25	synonymous SNV	ENSCAFG00000001448.5:ENSCAFT00000059562.1:exon1:c.C960T:p.P320P,ENSCAFG00000001448.5:ENSCAFT00000002258.5:exon1:c.C960T:p.P320P,	ENSCAFG00000001448	PIM1	PIM1	chr12	6213584	6213584	C	T	-	0/1	25,4	0.136	29
25	synonymous SNV	ENSCAFG00000002714.5:ENSCAFT00000004350.4:exon15:c.C2391T:p.T797T,	ENSCAFG00000002714	EPHA5	EPHA5	chr13	56079038	56079038	G	A	-	0/1	89,11	0.119	100
25	nonsynonymous SNV	ENSCAFG00000001754.4:ENSCAFT00000087472.1:exon11:c.G1420C:p.G474R,ENSCAFG00000001754.4:ENSCAFT00000002746.4:exon16:c.G1957C:p.G653R,ENSCAFG00000001754.4:ENSCAFT00000062245.1:exon17:c.G1873C:p.G625R,ENSCAFG00000001754.4:ENSCAFT00000080986.1:exon11:c.G1123C:p.G375R,ENSCAFG00000001754.4:ENSCAFT00000082826.1:exon13:c.G1792C:p.G598R,ENSCAFG00000001754.4:ENSCAFT00000086242.1:exon12:c.G1576C:p.G526R,	ENSCAFG00000001754	POT1	POT1	chr14	11056630	11056630	G	C	deleterious(0)	0/1	28,26	0.447	54
25	nonsynonymous SNV	ENSCAFG00000002576.5:ENSCAFT00000004055.5:exon7:c.G5788A:p.G1930S,	ENSCAFG00000002576	HIVEP3	HIVEP3	chr15	1620708	1620708	G	A	tolerated_low_confidence(0.89)	0/1	23,4	0.157	27
25	nonsynonymous SNV	ENSCAFG00000003196.5:ENSCAFT00000005139.5:exon2:c.T776C:p.V259A,	ENSCAFG00000003196	RRAGC	RRAGC	chr15	3877484	3877484	T	C	deleterious(0.03)	0/1	45,3	0.08	48
25	nonsynonymous SNV	ENSCAFG00000008141.5:ENSCAFT00000074984.1:exon10:c.G1316T:p.G439V,ENSCAFG00000008141.5:ENSCAFT00000012962.5:exon10:c.G1811T:p.G604V,ENSCAFG00000008141.5:ENSCAFT00000065773.1:exon10:c.G1430T:p.G477V,	ENSCAFG00000008141	FBXW7	FBXW7	chr15	50190856	50190856	C	A	deleterious(0.02)	0/1	54,18	0.264	72
25	nonsynonymous SNV	ENSCAFG00000008141.5:ENSCAFT00000074984.1:exon8:c.G1040A:p.R347H,ENSCAFG00000008141.5:ENSCAFT00000012962.5:exon8:c.G1535A:p.R512H,ENSCAFG00000008141.5:ENSCAFT00000065773.1:exon8:c.G1154A:p.R385H,	ENSCAFG00000008141	FBXW7	FBXW7	chr15	50194595	50194595	C	T	deleterious(0)	0/1	74,24	0.231	98
25	synonymous SNV	ENSCAFG00000003579.5:ENSCAFT00000074904.1:exon25:c.T4620A:p.I1540I,ENSCAFG00000003579.5:ENSCAFT00000067960.1:exon25:c.T4404A:p.I1468I,ENSCAFG00000003579.5:ENSCAFT00000005749.4:exon26:c.T4749A:p.I1583I,ENSCAFG00000003579.5:ENSCAFT00000073991.1:exon26:c.T4509A:p.I1503I,ENSCAFG00000003579.5:ENSCAFT00000081703.1:exon26:c.T4749A:p.I1583I,ENSCAFG00000003579.5:ENSCAFT00000060971.1:exon25:c.T4635A:p.I154…	ENSCAFG00000003579	GREB1	GREB1	chr17	8317328	8317328	T	A	-	0/1	51,8	0.125	59
25	nonsynonymous SNV	ENSCAFG00000005328.5:ENSCAFT00000049166.3:exon1:c.T2A:p.M1K,	ENSCAFG00000005328	GALNT14	GALNT14	chr17	24740888	24740888	A	T	-	0/1	8,8	0.571	16
25	nonsynonymous SNV	ENSCAFG00000023592.4:ENSCAFT00000063291.1:exon2:c.G868A:p.E290K,ENSCAFG00000023592.4:ENSCAFT00000036362.4:exon2:c.G868A:p.E290K,ENSCAFG00000023592.4:ENSCAFT00000036363.3:exon2:c.G868A:p.E290K,ENSCAFG00000023592.4:ENSCAFT00000010451.5:exon2:c.G868A:p.E290K,	ENSCAFG00000023592	SLC8A1	SLC8A1	chr17	32306832	32306832	C	T	tolerated(0.06)	0/1	118,13	0.102	131
25	synonymous SNV	ENSCAFG00000014131.4:ENSCAFT00000022427.4:exon7:c.C672T:p.D224D,ENSCAFG00000014131.4:ENSCAFT00000068076.1:exon6:c.C1092T:p.D364D,ENSCAFG00000014131.4:ENSCAFT00000069693.1:exon6:c.C657T:p.D219D,	ENSCAFG00000014131	C18H7orf57	C7orf57	chr18	93970	93970	C	T	-	0/1	24,17	0.414	41
25	nonsynonymous SNV	ENSCAFG00000009497.5:ENSCAFT00000048789.3:exon11:c.G1088A:p.G363D,ENSCAFG00000009497.5:ENSCAFT00000015091.4:exon11:c.G1067A:p.G356D,	ENSCAFG00000009497	ACCS	ACCS	chr18	45145705	45145705	C	T	deleterious(0.01)	0/1	48,4	0.081	52
25	nonsynonymous SNV	ENSCAFG00000008383.4:ENSCAFT00000013309.4:exon2:c.G55A:p.A19T,ENSCAFG00000008383.4:ENSCAFT00000090076.1:exon2:c.G55A:p.A19T,	ENSCAFG00000008383	PFN2	PFN2	chr23	44689610	44689610	C	T	deleterious(0.02)	0/1	92,8	0.07	100
25	nonsynonymous SNV	ENSCAFG00000009728.2:ENSCAFT00000015437.2:exon2:c.T203C:p.V68A,	ENSCAFG00000009728	WFDC13	WFDC13	chr24	33014363	33014363	T	C	deleterious(0)	0/1	64,4	0.08	68
25	nonsynonymous SNV	ENSCAFG00000011808.5:ENSCAFT00000018740.5:exon2:c.C2360T:p.T787M,ENSCAFG00000011808.5:ENSCAFT00000048827.2:exon2:c.C2483T:p.T828M,ENSCAFG00000011808.5:ENSCAFT00000080590.1:exon2:c.C2330T:p.T777M,	ENSCAFG00000011808	TSHZ2	TSHZ2	chr24	39172097	39172097	C	T	deleterious(0.01)	0/1	61,22	0.274	83
25	synonymous SNV	ENSCAFG00000010915.4:ENSCAFT00000017359.3:exon8:c.C732T:p.D244D,	ENSCAFG00000010915	FOXN4	FOXN4	chr26	17751415	17751415	C	T	-	0/1	40,19	0.325	59
25	nonsynonymous SNV	ENSCAFG00000011660.4:ENSCAFT00000018507.4:exon38:c.G5954A:p.R1985Q,ENSCAFG00000011660.4:ENSCAFT00000070650.1:exon37:c.G5840A:p.R1947Q,ENSCAFG00000011660.4:ENSCAFT00000081663.1:exon37:c.G5825A:p.R1942Q,ENSCAFG00000011660.4:ENSCAFT00000062006.1:exon37:c.G5780A:p.R1927Q,	ENSCAFG00000011660	MYO18B	MYO18B	chr26	19704851	19704851	G	A	deleterious(0)	0/1	26,10	0.36	36
25	nonframeshift deletion	ENSCAFG00000006580.5:ENSCAFT00000010628.4:exon3:c.133_135del:p.45_45del,ENSCAFG00000006580.5:ENSCAFT00000010627.5:exon3:c.133_135del:p.45_45del,ENSCAFG00000006580.5:ENSCAFT00000087714.1:exon3:c.133_135del:p.45_45del,	ENSCAFG00000006580	HNRNPA1	HNRNPA1	chr27	1018831	1018853	TACCTGAAAGGTGAGCTCCCTGA	-	-	0/1	94,10	0.103	104
25	synonymous SNV	ENSCAFG00000012441.4:ENSCAFT00000092748.1:exon7:c.T756C:p.H252H,ENSCAFG00000012441.4:ENSCAFT00000019759.4:exon7:c.T1278C:p.H426H,	ENSCAFG00000012441	AEBP2	AEBP2	chr27	27659744	27659744	A	G	-	0/1	51,6	0.108	57
25	nonsynonymous SNV	ENSCAFG00000013596.4:ENSCAFT00000021549.4:exon1:c.A37C:p.S13R,	ENSCAFG00000013596	CD69	CD69	chr27	36197338	36197338	A	C	deleterious(0)	0/1	63,5	0.106	68
25	stopgain	ENSCAFG00000007344.5:ENSCAFT00000043735.3:exon6:c.C553T:p.R185X,ENSCAFG00000007344.5:ENSCAFT00000011750.4:exon6:c.C553T:p.R185X,ENSCAFG00000007344.5:ENSCAFT00000062089.1:exon6:c.C553T:p.R185X,	ENSCAFG00000007344	MYBL1	MYBL1	chr29	16174462	16174462	G	A	-	0/1	45,20	0.333	65
25	nonsynonymous SNV	ENSCAFG00000009179.4:ENSCAFT00000086951.1:exon8:c.G1426T:p.D476Y,ENSCAFG00000009179.4:ENSCAFT00000014598.4:exon8:c.G1426T:p.D476Y,	ENSCAFG00000009179	RAD54B	RAD54B	chr29	39131646	39131646	C	A	deleterious(0)	0/1	41,6	0.143	47
25	synonymous SNV	ENSCAFG00000007361.4:ENSCAFT00000011799.4:exon15:c.G1272C:p.P424P,ENSCAFG00000007361.4:ENSCAFT00000092858.1:exon14:c.G1146C:p.P382P,	ENSCAFG00000007361	EPB41L4A	EPB41L4A	chr3	651014	651014	G	C	-	0/1	85,9	0.123	94
25	nonsynonymous SNV	ENSCAFG00000013173.4:ENSCAFT00000020918.4:exon21:c.A3783T:p.R1261S,	ENSCAFG00000013173	STRC	STRC	chr30	10449425	10449425	T	A	tolerated(0.48)	0/1	28,4	0.118	32
25	nonsynonymous SNV	ENSCAFG00000017011.6:ENSCAFT00000026962.5:exon2:c.G335A:p.R112H,	ENSCAFG00000017011	HERC1	HERC1	chr30	28336130	28336130	C	T	deleterious(0)	0/1	81,4	0.061	85
25	nonsynonymous SNV	ENSCAFG00000018057.2:ENSCAFT00000063763.1:exon3:c.C221T:p.T74I,ENSCAFG00000018057.2:ENSCAFT00000028688.2:exon3:c.C437T:p.T146I,ENSCAFG00000018057.2:ENSCAFT00000092295.1:exon2:c.C662T:p.T221I,ENSCAFG00000018057.2:ENSCAFT00000063373.1:exon2:c.C218T:p.T73I,	ENSCAFG00000018057	LINGO1	LINGO1	chr30	38735552	38735552	C	T	deleterious(0.01)	0/1	60,27	0.31	87
25	synonymous SNV	ENSCAFG00000025084.3:ENSCAFT00000038848.3:exon13:c.T2106C:p.P702P,	ENSCAFG00000025084	PAXBP1	-	chr31	27417317	27417317	A	G	-	0/1	49,6	0.118	55
25	nonsynonymous SNV	ENSCAFG00000010572.5:ENSCAFT00000088453.1:exon1:c.C509T:p.A170V,	ENSCAFG00000010572	-	U2AF1L5	chr31	37276658	37276658	G	A	tolerated_low_confidence(0.13)	0/1	22,4	0.176	26
25	nonsynonymous SNV	ENSCAFG00000012045.5:ENSCAFT00000045471.3:exon37:c.A7720G:p.N2574D,ENSCAFG00000012045.5:ENSCAFT00000019125.5:exon38:c.A7726G:p.N2576D,	ENSCAFG00000012045	PCNT	PCNT	chr31	39661705	39661705	A	G	deleterious(0)	0/1	15,4	0.214	19
25	nonsynonymous SNV	ENSCAFG00000014075.4:ENSCAFT00000022347.4:exon2:c.G1201T:p.V401L,	ENSCAFG00000014075	MB21D2	MB21D2	chr34	24413924	24413924	C	A	deleterious(0)	0/1	117,14	0.117	131
25	nonsynonymous SNV	ENSCAFG00000014786.5:ENSCAFT00000060181.1:exon7:c.C1948T:p.P650S,ENSCAFG00000014786.5:ENSCAFT00000063461.1:exon8:c.C2026T:p.P676S,ENSCAFG00000014786.5:ENSCAFT00000083230.1:exon9:c.C1648T:p.P550S,ENSCAFG00000014786.5:ENSCAFT00000062622.1:exon8:c.C1732T:p.P578S,ENSCAFG00000014786.5:ENSCAFT00000092183.1:exon7:c.C1927T:p.P643S,ENSCAFG00000014786.5:ENSCAFT00000023476.5:exon8:c.C2026T:p.P676S,ENSCAFG00…	ENSCAFG00000014786	PHC3	PHC3	chr34	34699021	34699021	G	A	deleterious(0)	0/1	160,8	0.063	168
25	nonsynonymous SNV	ENSCAFG00000012174.4:ENSCAFT00000019757.4:exon7:c.G836A:p.R279H,ENSCAFG00000012174.4:ENSCAFT00000072474.1:exon7:c.G836A:p.R279H,	ENSCAFG00000012174	ATP1A4	ATP1A2	chr38	22042788	22042788	C	T	deleterious(0.02)	0/1	83,8	0.081	91
25	nonsynonymous SNV	ENSCAFG00000019662.4:ENSCAFT00000031266.4:exon6:c.C758T:p.A253V,	ENSCAFG00000019662	PIGQ	PIGQ	chr6	39975884	39975884	G	A	deleterious(0)	0/1	34,5	0.147	39
25	synonymous SNV	ENSCAFG00000019703.4:ENSCAFT00000064558.1:exon19:c.C2610T:p.F870F,ENSCAFG00000019703.4:ENSCAFT00000080316.1:exon19:c.C2709T:p.F903F,ENSCAFG00000019703.4:ENSCAFT00000031344.4:exon18:c.C2517T:p.F839F,ENSCAFG00000019703.4:ENSCAFT00000067719.1:exon18:c.C2505T:p.F835F,	ENSCAFG00000019703	RHBDF1	RHBDF1	chr6	40413262	40413262	C	T	-	0/1	69,11	0.161	80
25	synonymous SNV	ENSCAFG00000020154.5:ENSCAFT00000075760.1:exon21:c.G2667A:p.P889P,	ENSCAFG00000020154	GFI1	EVI5	chr6	56475979	56475979	G	A	-	0/1	21,3	0.143	24
25	nonsynonymous SNV	ENSCAFG00000029016.2:ENSCAFT00000048584.2:exon6:c.A1073G:p.K358R,	ENSCAFG00000029016	CACYBP	CACYBP	chr7	24373089	24373089	T	C	deleterious(0.03)	0/1	65,4	0.078	69
25	nonsynonymous SNV	ENSCAFG00000017783.4:ENSCAFT00000070100.1:exon20:c.C1991T:p.T664I,ENSCAFG00000017783.4:ENSCAFT00000079275.1:exon21:c.C2054T:p.T685I,ENSCAFG00000017783.4:ENSCAFT00000028221.4:exon21:c.C2093T:p.T698I,	ENSCAFG00000017783	PAPOLA	PAPOLA	chr8	65278944	65278944	C	T	tolerated(0.18)	0/1	25,3	0.157	28
25	synonymous SNV	ENSCAFG00000017929.3:ENSCAFT00000028454.3:exon1:c.G3045A:p.S1015S,	ENSCAFG00000017929	RTL1	RTL1	chr8	69103643	69103643	C	T	-	0/1	64,85	0.541	149
25	stopgain	ENSCAFG00000018075.4:ENSCAFT00000028719.4:exon5:c.C547T:p.Q183X,ENSCAFG00000018075.4:ENSCAFT00000085506.1:exon5:c.C547T:p.Q183X,ENSCAFG00000018075.4:ENSCAFT00000086511.1:exon5:c.C547T:p.Q183X,	ENSCAFG00000018075	TRAF3	TRAF3	chr8	70767999	70767999	C	T	-	0/1	50,5	0.111	55
25	nonsynonymous SNV	ENSCAFG00000018268.4:ENSCAFT00000029024.4:exon3:c.C1358T:p.S453F,	ENSCAFG00000018268	SLFN14	SLFN14	chr9	38106648	38106648	C	T	deleterious(0.02)	0/1	70,34	0.338	104
25	nonsynonymous SNV	ENSCAFG00000020061.4:ENSCAFT00000093886.1:exon2:c.T110C:p.I37T,ENSCAFG00000020061.4:ENSCAFT00000031918.4:exon1:c.T110C:p.I37T,	ENSCAFG00000020061	CERCAM	CERCAM	chr9	55119900	55119900	A	G	deleterious(0)	0/1	24,3	0.157	27
25	frameshift deletion	ENSCAFG00000015163.3:ENSCAFT00000024066.3:exon6:c.873delC:p.P291fs,	ENSCAFG00000015163	CFP	CFP	chrX	41248341	41248341	G	-	-	0/1	68,5	0.111	73
25	synonymous SNV	ENSCAFG00000015672.5:ENSCAFT00000024826.5:exon4:c.T288C:p.N96N,ENSCAFG00000015672.5:ENSCAFT00000049058.2:exon2:c.T318C:p.N106N,ENSCAFG00000015672.5:ENSCAFT00000061910.1:exon5:c.T288C:p.N96N,	ENSCAFG00000015672	PQBP1	PQBP1	chrX	42059307	42059307	T	C	-	0/1	23,4	0.12	27
25	synonymous SNV	ENSCAFG00000031061.2:ENSCAFT00000049029.2:exon5:c.C714A:p.G238G,ENSCAFG00000031061.2:ENSCAFT00000076033.1:exon5:c.C714A:p.G238G,ENSCAFG00000031061.2:ENSCAFT00000078293.1:exon5:c.C714A:p.G238G,ENSCAFG00000031061.2:ENSCAFT00000047639.2:exon5:c.C714A:p.G238G,	ENSCAFG00000031061	ZMIZ2	ZMIZ2	chrUn_JH373278	264011	264011	G	T	-	0/1	26,3	0.124	29
26	nonsynonymous SNV	ENSCAFG00000000874.5:ENSCAFT00000083398.1:exon7:c.G953A:p.C318Y,ENSCAFG00000000874.5:ENSCAFT00000001365.4:exon5:c.G908A:p.C303Y,ENSCAFG00000000874.5:ENSCAFT00000046608.3:exon6:c.G758A:p.C253Y,	ENSCAFG00000000874	THBS2	THBS2	chr1	56418288	56418288	C	T	deleterious(0)	0/1	41,21	0.357	62
26	stopgain	ENSCAFG00000002907.4:ENSCAFT00000073731.1:exon1:c.G420A:p.W140X,ENSCAFG00000002907.4:ENSCAFT00000004655.4:exon2:c.G378A:p.W126X,ENSCAFG00000002907.4:ENSCAFT00000069418.1:exon3:c.G222A:p.W74X,	ENSCAFG00000002907	KLK2	KLK2	chr1	105982925	105982925	C	T	-	0/1	56,5	0.083	61
26	nonsynonymous SNV	ENSCAFG00000004727.5:ENSCAFT00000007605.5:exon2:c.G479A:p.G160D,ENSCAFG00000004727.5:ENSCAFT00000089933.1:exon2:c.G692A:p.G231D,	ENSCAFG00000004727	IRGC	IRGC	chr1	111443237	111443237	C	T	tolerated(0.09)	0/1	64,4	0.065	68
26	nonsynonymous SNV	ENSCAFG00000005606.5:ENSCAFT00000077322.1:exon2:c.A1162G:p.N388D,ENSCAFG00000005606.5:ENSCAFT00000009039.5:exon3:c.A970G:p.N324D,	ENSCAFG00000005606	PAK4	PAK4	chr1	114014257	114014257	T	C	tolerated(0.07)	0/1	11,4	0.3	15
26	nonsynonymous SNV	ENSCAFG00000005931.4:ENSCAFT00000076646.1:exon3:c.G382A:p.A128T,ENSCAFG00000005931.4:ENSCAFT00000009549.5:exon4:c.G460A:p.A154T,	ENSCAFG00000005931	PSMD8	SPRED3	chr1	114611017	114611017	C	T	deleterious(0)	0/1	33,4	0.132	37
26	synonymous SNV	ENSCAFG00000007631.4:ENSCAFT00000085886.1:exon3:c.C573T:p.G191G,ENSCAFG00000007631.4:ENSCAFT00000071234.1:exon4:c.C480T:p.G160G,ENSCAFG00000007631.4:ENSCAFT00000012197.4:exon3:c.C372T:p.G124G,	ENSCAFG00000007631	VSTM2B	VSTM2B	chr1	121877150	121877150	G	A	-	0/1	9,3	0.273	12
26	nonsynonymous SNV	ENSCAFG00000001630.4:ENSCAFT00000075575.1:exon26:c.A3701G:p.E1234G,ENSCAFG00000001630.4:ENSCAFT00000062066.1:exon28:c.A3677G:p.E1226G,ENSCAFG00000001630.4:ENSCAFT00000061164.1:exon27:c.A3794G:p.E1265G,ENSCAFG00000001630.4:ENSCAFT00000075802.1:exon26:c.A3587G:p.E1196G,ENSCAFG00000001630.4:ENSCAFT00000076480.1:exon28:c.A3857G:p.E1286G,ENSCAFG00000001630.4:ENSCAFT00000002643.4:exon27:c.A3794G:p.E126…	ENSCAFG00000001630	MYH9	MYH9	chr10	28112357	28112357	A	G	deleterious(0)	0/1	24,4	0.143	28
26	nonsynonymous SNV	ENSCAFG00000000348.5:ENSCAFT00000045938.2:exon13:c.A1447G:p.S483G,ENSCAFG00000000348.5:ENSCAFT00000000548.5:exon17:c.A1657G:p.S553G,ENSCAFG00000000348.5:ENSCAFT00000048458.3:exon15:c.A1603G:p.S535G,	ENSCAFG00000000348	CANX	CANX	chr11	1969987	1969987	T	C	tolerated(0.22)	0/1	53,38	0.397	91
26	nonsynonymous SNV	ENSCAFG00000001725.4:ENSCAFT00000063934.1:exon9:c.G2284A:p.V762I,ENSCAFG00000001725.4:ENSCAFT00000002701.4:exon11:c.G2491A:p.V831I,ENSCAFG00000001725.4:ENSCAFT00000060242.1:exon10:c.G2422A:p.V808I,	ENSCAFG00000001725	BICRAL	BICRAL	chr12	11430157	11430157	G	A	tolerated(0.18)	0/1	9,3	0.3	12
26	nonsynonymous SNV	ENSCAFG00000049685.1:ENSCAFT00000001946.2:exon1:c.G770A:p.G257E,	ENSCAFG00000049685	OR2T4C	-	chr14	2466889	2466889	G	A	deleterious(0)	0/1	217,16	0.075	233
26	nonsynonymous SNV	ENSCAFG00000002717.5:ENSCAFT00000004311.4:exon56:c.G9046A:p.A3016T,	ENSCAFG00000002717	DNAH11	DNAH11	chr14	35664481	35664481	G	A	deleterious(0.05)	0/1	105,26	0.238	131
26	nonsynonymous SNV	ENSCAFG00000005483.4:ENSCAFT00000076206.1:exon11:c.G2708A:p.G903D,ENSCAFG00000005483.4:ENSCAFT00000061200.1:exon11:c.G2708A:p.G903D,ENSCAFG00000005483.4:ENSCAFT00000008831.4:exon11:c.G2708A:p.G903D,	ENSCAFG00000005483	ARHGEF4-	ARHGEF4-	chr15	18169515	18169515	G	A	tolerated(0.22)	0/1	22,4	0.176	26
26	nonsynonymous SNV	ENSCAFG00000030403.2:ENSCAFT00000044772.2:exon2:c.G442C:p.V148L,	ENSCAFG00000030403	LRAT	LRAT	chr15	52401562	52401562	G	C	deleterious(0)	0/1	75,24	0.257	99
26	nonsynonymous SNV	ENSCAFG00000009003.5:ENSCAFT00000060087.1:exon25:c.G3349A:p.A1117T,ENSCAFG00000009003.5:ENSCAFT00000073887.1:exon26:c.G3688A:p.A1230T,ENSCAFG00000009003.5:ENSCAFT00000044956.3:exon26:c.G3688A:p.A1230T,ENSCAFG00000009003.5:ENSCAFT00000014321.3:exon26:c.G3688A:p.A1230T,ENSCAFG00000009003.5:ENSCAFT00000065432.1:exon24:c.G3232A:p.A1078T,	ENSCAFG00000009003	DDX6-	DDX6-	chr15	63685123	63685123	C	T	tolerated(0.67)	0/1	37,9	0.222	46
26	stopgain	ENSCAFG00000006325.5:ENSCAFT00000038853.3:exon1:c.C4T:p.Q2X,	ENSCAFG00000006325	MAK16	MAK16	chr16	31179957	31179957	G	A	-	0/1	21,4	0.166	25
26	frameshift deletion	ENSCAFG00000006745.5:ENSCAFT00000010865.5:exon6:c.3368delC:p.A1123fs,	ENSCAFG00000006745	PRAG1	PRAG1	chr16	36102977	36102977	C	-	-	0/1	82,8	0.08	90
26	synonymous SNV	ENSCAFG00000003214.4:ENSCAFT00000005158.4:exon11:c.C1092T:p.V364V,	ENSCAFG00000003214	SNTG2	SNTG2	chr17	743956	743956	C	T	-	0/1	30,9	0.25	39
26	nonsynonymous SNV	ENSCAFG00000006805.5:ENSCAFT00000010955.5:exon1:c.C199T:p.P67S,ENSCAFG00000006805.5:ENSCAFT00000068873.1:exon1:c.C199T:p.P67S,	ENSCAFG00000006805	ADRA2B	ADRA2B	chr17	34615531	34615531	C	T	deleterious(0)	0/1	114,23	0.16	137
26	nonsynonymous SNV	ENSCAFG00000012869.3:ENSCAFT00000020415.3:exon1:c.G484A:p.G162S,	ENSCAFG00000012869	LINGO4	LINGO4	chr17	60816965	60816965	C	T	tolerated(0.45)	0/1	71,16	0.177	87
26	synonymous SNV	ENSCAFG00000013454.5:ENSCAFT00000021339.5:exon2:c.G108A:p.K36K,ENSCAFG00000013454.5:ENSCAFT00000084802.1:exon2:c.G312A:p.K104K,	ENSCAFG00000013454	MOV1-	MOV1-	chr17	62895708	62895708	C	T	-	0/1	32,24	0.444	56
26	nonsynonymous SNV	ENSCAFG00000043255.1:ENSCAFT00000044192.2:exon1:c.G298T:p.A100S,	ENSCAFG00000043255	OR5B32	-	chr18	38085871	38085871	G	T	tolerated_low_confidence(0.07)	0/1	124,58	0.293	182
26	nonsynonymous SNV	ENSCAFG00000011629.4:ENSCAFT00000018468.4:exon1:c.G409A:p.A137T,	ENSCAFG00000011629	CLCF1	AP--3419.1	chr18	50101380	50101380	G	A	deleterious_low_confidence(0)	0/1	32,4	0.143	36
26	nonsynonymous SNV	ENSCAFG00000004516.4:ENSCAFT00000007283.4:exon14:c.G1453C:p.A485P,	ENSCAFG00000004516	STAM	STAM	chr2	19266219	19266219	C	G	tolerated_low_confidence(0.13)	0/1	63,4	0.065	67
26	frameshift insertion	ENSCAFG00000012314.6:ENSCAFT00000084179.1:exon19:c.6531_6532insAG:p.F2178fs,ENSCAFG00000012314.6:ENSCAFT00000080683.1:exon19:c.6534_6535insAG:p.F2179fs,ENSCAFG00000012314.6:ENSCAFT00000068973.1:exon18:c.6078_6079insAG:p.F2027fs,ENSCAFG00000012314.6:ENSCAFT00000019631.5:exon20:c.6747_6748insAG:p.F2250fs,	ENSCAFG00000012314	ARID1A	ARID1A	chr2	73333066	73333066	-	CT	-	0/1	74,18	0.209	92
26	nonsynonymous SNV	ENSCAFG00000005991.5:ENSCAFT00000038503.4:exon4:c.A403C:p.T135P,ENSCAFG00000005991.5:ENSCAFT00000009673.4:exon4:c.A403C:p.T135P,	ENSCAFG00000005991	IL5RA	IL5RA	chr20	14320054	14320054	A	C	deleterious(0.03)	0/1	47,25	0.34	72
26	nonsynonymous SNV	ENSCAFG00000019263.4:ENSCAFT00000030591.4:exon7:c.C1241T:p.T414M,	ENSCAFG00000019263	CELF5	CELF5	chr20	56038558	56038558	G	A	deleterious_low_confidence(0.04)	0/1	49,4	0.079	53
26	nonsynonymous SNV	ENSCAFG00000005074.5:ENSCAFT00000008331.5:exon15:c.T2057C:p.M686T,ENSCAFG00000005074.5:ENSCAFT00000008307.4:exon16:c.T1934C:p.M645T,ENSCAFG00000005074.5:ENSCAFT00000073157.1:exon16:c.T1934C:p.M645T,	ENSCAFG00000005074	MYO7A	MYO7A	chr21	21577578	21577578	A	G	deleterious(0.02)	0/1	26,13	0.333	39
26	nonsynonymous SNV	ENSCAFG00000006030.4:ENSCAFT00000009743.4:exon1:c.A220T:p.S74C,ENSCAFG00000006030.4:ENSCAFT00000090141.1:exon1:c.A220T:p.S74C,	ENSCAFG00000006030	PCNA	PCNA	chr24	16479189	16479189	A	T	deleterious(0.01)	0|1	26,3	0.13	29
26	nonsynonymous SNV	ENSCAFG00000024001.3:ENSCAFT00000037177.3:exon4:c.A2159T:p.K720M,	ENSCAFG00000024001	FAM217B	FAM217B	chr24	44555937	44555937	A	T	deleterious_low_confidence(0)	0/1	39,5	0.114	44
26	nonsynonymous SNV	ENSCAFG00000012386.4:ENSCAFT00000019670.3:exon1:c.G538A:p.A180T,	ENSCAFG00000012386	KLHL3-	KLHL3-	chr25	48641341	48641341	G	A	tolerated(0.37)	0/1	22,4	0.15	26
26	synonymous SNV	ENSCAFG00000011849.5:ENSCAFT00000018827.5:exon16:c.T4983A:p.P1661P,	ENSCAFG00000011849	TTC28	TTC28	chr26	21441700	21441700	A	T	-	0/1	62,5	0.085	67
26	nonsynonymous SNV	ENSCAFG00000011973.5:ENSCAFT00000019014.5:exon4:c.T354A:p.D118E,	ENSCAFG00000011973	ZNRF3	ZNRF3	chr26	22386718	22386718	T	A	deleterious(0.01)	0/1	70,44	0.378	114
26	nonsynonymous SNV	ENSCAFG00000006614.4:ENSCAFT00000010660.4:exon1:c.C869T:p.P290L,	ENSCAFG00000006614	-	GALNT7	chr28	1159112	1159112	G	A	deleterious(0)	0/1	157,37	0.187	194
26	nonsynonymous SNV	ENSCAFG00000012374.5:ENSCAFT00000009748.5:exon10:c.C1244T:p.T415M,ENSCAFG00000012374.5:ENSCAFT00000086510.1:exon8:c.C1076T:p.T359M,ENSCAFG00000012374.5:ENSCAFT00000093233.1:exon8:c.C902T:p.T301M,ENSCAFG00000012374.5:ENSCAFT00000085560.1:exon10:c.C1115T:p.T372M,ENSCAFG00000012374.5:ENSCAFT00000065674.1:exon8:c.C905T:p.T302M,ENSCAFG00000012374.5:ENSCAFT00000019648.4:exon6:c.C827T:p.T276M,ENSCAFG000…	ENSCAFG00000012374	FGFR2	FGFR2	chr28	31338265	31338265	G	A	tolerated(0.22)	0/1	56,20	0.286	76
26	nonsynonymous SNV	ENSCAFG00000011241.4:ENSCAFT00000017864.4:exon11:c.G2004C:p.E668D,	ENSCAFG00000011241	SLCO3A1	SLCO3A1	chr3	47927950	47927950	C	G	deleterious_low_confidence(0.04)	0/1	155,48	0.239	203
26	nonsynonymous SNV	ENSCAFG00000013288.4:ENSCAFT00000021096.4:exon14:c.A1679G:p.E560G,ENSCAFG00000013288.4:ENSCAFT00000090522.1:exon13:c.A1637G:p.E546G,ENSCAFG00000013288.4:ENSCAFT00000063932.1:exon13:c.A1697G:p.E566G,	ENSCAFG00000013288	ADAMTSL3	ADAMTSL3	chr3	55563904	55563904	A	G	deleterious(0)	0|1	81,4	0.052	85
26	nonsynonymous SNV	ENSCAFG00000013863.4:ENSCAFT00000082833.1:exon12:c.C1709A:p.S570Y,ENSCAFG00000013863.4:ENSCAFT00000065721.1:exon15:c.C2351A:p.S784Y,ENSCAFG00000013863.4:ENSCAFT00000022000.4:exon14:c.C1958A:p.S653Y,ENSCAFG00000013863.4:ENSCAFT00000073972.1:exon14:c.C2351A:p.S784Y,	ENSCAFG00000013863	CEMIP	CEMIP	chr3	56751294	56751294	G	T	deleterious(0)	0/1	105,51	0.305	156
26	synonymous SNV	ENSCAFG00000014444.5:ENSCAFT00000022965.4:exon1:c.C60T:p.A20A,	ENSCAFG00000014444	-	CBR1	chr31	31339603	31339603	C	T	-	0/1	596,97	0.132	693
26	nonsynonymous SNV	ENSCAFG00000010419.5:ENSCAFT00000048369.3:exon13:c.G1556A:p.S519N,	ENSCAFG00000010419	TMPRSS7	TMPRSS7	chr33	16695870	16695870	G	A	tolerated(0.3)	0/1	29,6	0.181	35
26	nonsynonymous SNV	ENSCAFG00000010491.5:ENSCAFT00000048550.3:exon12:c.G1727A:p.G576D,ENSCAFG00000010491.5:ENSCAFT00000016686.4:exon13:c.G1268A:p.G423D,	ENSCAFG00000010491	LPCAT1	LPCAT1	chr34	11191074	11191074	G	A	deleterious(0.01)	0/1	69,4	0.061	73
26	synonymous SNV	ENSCAFG00000009570.5:ENSCAFT00000015201.4:exon1:c.C18T:p.G6G,	ENSCAFG00000009570	DSP	DSP	chr35	7479864	7479864	C	T	-	0/1	18,4	0.167	22
26	synonymous SNV	ENSCAFG00000014575.5:ENSCAFT00000065916.1:exon25:c.C4731T:p.P1577P,ENSCAFG00000014575.5:ENSCAFT00000082385.1:exon27:c.C4083T:p.P1361P,ENSCAFG00000014575.5:ENSCAFT00000066130.1:exon28:c.C4203T:p.P1401P,ENSCAFG00000014575.5:ENSCAFT00000088129.1:exon26:c.C3999T:p.P1333P,ENSCAFG00000014575.5:ENSCAFT00000061434.1:exon27:c.C4164T:p.P1388P,ENSCAFG00000014575.5:ENSCAFT00000087417.1:exon27:c.C4146T:p.P138…	ENSCAFG00000014575	TNS1	TNS1	chr37	24596271	24596271	G	A	-	0/1	45,21	0.326	66
26	synonymous SNV	ENSCAFG00000011765.3:ENSCAFT00000038859.2:exon1:c.C282T:p.S94S,	ENSCAFG00000011765	OR1-J4	OR1-J4	chr38	22591346	22591346	G	A	-	0/1	18,13	0.364	31
26	nonsynonymous SNV	ENSCAFG00000016982.4:ENSCAFT00000026895.4:exon33:c.C3271A:p.P1091T,	ENSCAFG00000016982	DOCK2	DOCK2	chr4	41835653	41835653	G	T	deleterious(0)	0/1	66,32	0.317	98
26	nonsynonymous SNV	ENSCAFG00000018576.2:ENSCAFT00000029486.2:exon3:c.C403T:p.R135C,	ENSCAFG00000018576	NIM1K	NIM1K	chr4	66666158	66666158	G	A	deleterious(0.03)	0/1	121,27	0.188	148
26	nonsynonymous SNV	ENSCAFG00000016888.5:ENSCAFT00000026743.5:exon2:c.T682C:p.S228P,	ENSCAFG00000016888	KCNAB3	KCNAB3	chr5	32781807	32781807	A	G	deleterious_low_confidence(0)	0/1	59,4	0.056	63
26	nonsynonymous SNV	ENSCAFG00000017455.4:ENSCAFT00000089210.1:exon9:c.G833A:p.R278H,ENSCAFG00000017455.4:ENSCAFT00000061241.1:exon9:c.G797A:p.R266H,ENSCAFG00000017455.4:ENSCAFT00000027655.4:exon10:c.G785A:p.R262H,ENSCAFG00000017455.4:ENSCAFT00000061774.1:exon10:c.G797A:p.R266H,	ENSCAFG00000017455	GAS7	GAS7	chr5	34346644	34346644	C	T	deleterious(0)	0/1	79,46	0.372	125
26	nonsynonymous SNV	ENSCAFG00000018912.4:ENSCAFT00000030017.4:exon1:c.C92T:p.P31L,	ENSCAFG00000018912	RMI2	RMI2	chr6	31445219	31445219	G	A	deleterious(0)	0/1	13,4	0.308	17
26	nonsynonymous SNV	ENSCAFG00000019438.5:ENSCAFT00000030906.4:exon36:c.T4754A:p.I1585N,ENSCAFG00000019438.5:ENSCAFT00000045663.3:exon35:c.T4667A:p.I1556N,	ENSCAFG00000019438	TSC2	TSC2	chr6	38867909	38867909	A	T	deleterious(0)	0|1	59,4	0.092	63
26	nonsynonymous SNV	ENSCAFG00000019687.4:ENSCAFT00000031302.4:exon3:c.C133T:p.R45W,ENSCAFG00000019687.4:ENSCAFT00000089506.1:exon3:c.C133T:p.R45W,ENSCAFG00000019687.4:ENSCAFT00000060455.1:exon3:c.C136T:p.R46W,	ENSCAFG00000019687	FAM234A	FAM234A	chr6	40244702	40244702	G	A	deleterious(0)	0/1	64,29	0.319	93
26	nonsynonymous SNV	ENSCAFG00000015316.5:ENSCAFT00000024316.5:exon3:c.C1049T:p.T350M,	ENSCAFG00000015316	GPR161	GPR161	chr7	30395973	30395973	C	T	deleterious(0.01)	0/1	69,29	0.275	98
26	nonsynonymous SNV	ENSCAFG00000015819.4:ENSCAFT00000084224.1:exon93:c.C17192G:p.A5731G,ENSCAFG00000015819.4:ENSCAFT00000089121.1:exon93:c.C17147G:p.A5716G,ENSCAFG00000015819.4:ENSCAFT00000078088.1:exon94:c.C17279G:p.A5760G,ENSCAFG00000015819.4:ENSCAFT00000088554.1:exon93:c.C17177G:p.A5726G,ENSCAFG00000015819.4:ENSCAFT00000066626.1:exon93:c.C17108G:p.A5703G,ENSCAFG00000015819.4:ENSCAFT00000093800.1:exon93:c.C16559G:…	ENSCAFG00000015819	SYNE2	SYNE2	chr8	38591712	38591712	C	G	tolerated(0.18)	0/1	37,12	0.294	49
26	frameshift deletion	ENSCAFG00000018075.4:ENSCAFT00000028719.4:exon11:c.1278_1279del:p.K426fs,ENSCAFG00000018075.4:ENSCAFT00000085506.1:exon8:c.1029_1030del:p.K343fs,ENSCAFG00000018075.4:ENSCAFT00000086511.1:exon10:c.1203_1204del:p.K401fs,	ENSCAFG00000018075	TRAF3	TRAF3	chr8	70789216	70789217	GC	-	-	0/1	32,23	0.462	55
26	nonsynonymous SNV	ENSCAFG00000046771.1:ENSCAFT00000077325.1:exon2:c.A577G:p.T193A,	ENSCAFG00000046771	-	IGHV4-4	chr8	73028186	73028186	T	C	deleterious_low_confidence(0.01)	0/1	30,24	0.417	54
26	nonsynonymous SNV	ENSCAFG00000046771.1:ENSCAFT00000077325.1:exon1:c.C38T:p.A13V,	ENSCAFG00000046771	-	IGHV4-4	chr8	73028806	73028806	G	A	tolerated(0.06)	0/1	15,17	0.518	32
26	synonymous SNV	ENSCAFG00000014429.5:ENSCAFT00000075239.1:exon3:c.C387T:p.C129C,ENSCAFG00000014429.5:ENSCAFT00000022928.4:exon3:c.C387T:p.C129C,ENSCAFG00000014429.5:ENSCAFT00000049433.3:exon3:c.C387T:p.C129C,	ENSCAFG00000014429	CD3--LG	CD3--LG	chr9	19459704	19459704	G	A	-	0/1	24,4	0.143	28
26	stopgain	ENSCAFG00000030300.2:ENSCAFT00000049953.2:exon4:c.C1063T:p.Q355X,	ENSCAFG00000030300	CCR7	CCR7	chr9	22089579	22089579	C	T	-	0/1	75,4	0.089	79
26	synonymous SNV	ENSCAFG00000018868.5:ENSCAFT00000068428.1:exon42:c.C6552T:p.S2184S,ENSCAFG00000018868.5:ENSCAFT00000092782.1:exon44:c.C7386T:p.S2462S,ENSCAFG00000018868.5:ENSCAFT00000089184.1:exon40:c.C6540T:p.S2180S,ENSCAFG00000018868.5:ENSCAFT00000075723.1:exon42:c.C7248T:p.S2416S,ENSCAFG00000018868.5:ENSCAFT00000067673.1:exon44:c.C6426T:p.S2142S,ENSCAFG00000018868.5:ENSCAFT00000086424.1:exon43:c.C7326T:p.S244…	ENSCAFG00000018868	MYO18A	MYO18A	chr9	43233033	43233033	G	A	-	0/1	29,3	0.12	32
26	nonsynonymous SNV	ENSCAFG00000023562.4:ENSCAFT00000036277.5:exon40:c.A5696G:p.E1899G,ENSCAFG00000023562.4:ENSCAFT00000078039.1:exon40:c.A5684G:p.E1895G,	ENSCAFG00000023562	DMD	DMD	chrX	27476760	27476760	T	C	deleterious(0)	0/1	54,19	0.3	73
26	synonymous SNV	ENSCAFG00000013807.4:ENSCAFT00000021914.4:exon3:c.G489A:p.S163S,	ENSCAFG00000013807	TMEM47	TMEM47	chrX	29678658	29678658	C	T	-	0/1	154,64	0.313	218
26	synonymous SNV	ENSCAFG00000018631.5:ENSCAFT00000029596.5:exon10:c.G1509C:p.G503G,ENSCAFG00000018631.5:ENSCAFT00000029594.4:exon10:c.G1509C:p.G503G,	ENSCAFG00000018631	TENM1	TENM1	chrX	96023149	96023149	C	G	-	0|1	54,4	0.07	58
26	stopgain	ENSCAFG00000028989.2:ENSCAFT00000044688.2:exon3:c.C592T:p.Q198X,	ENSCAFG00000028989	RAB4-B	RAB4-B	chrUn_JH373243	215662	215662	G	A	-	0/1	35,4	0.119	39
27	synonymous SNV	ENSCAFG00000000020.4:ENSCAFT00000036397.2:exon2:c.G1953A:p.P651P,	ENSCAFG00000000020	TSHZ1	TSHZ1	chr1	4227554	4227554	C	T	-	0/1	55,4	0.066	59
27	nonsynonymous SNV	ENSCAFG00000000272.5:ENSCAFT00000066773.1:exon15:c.C2948T:p.P983L,ENSCAFG00000000272.5:ENSCAFT00000044681.3:exon16:c.C3080T:p.P1027L,ENSCAFG00000000272.5:ENSCAFT00000086635.1:exon15:c.C2957T:p.P986L,ENSCAFG00000000272.5:ENSCAFT00000000423.4:exon14:c.C2825T:p.P942L,ENSCAFG00000000272.5:ENSCAFT00000083086.1:exon14:c.C2906T:p.P969L,	ENSCAFG00000000272	ARFGEF3	ARFGEF3	chr1	30609110	30609110	C	T	tolerated(0.07)	0/1	29,23	0.429	52
27	nonsynonymous SNV	ENSCAFG00000001216.4:ENSCAFT00000070736.1:exon4:c.G283A:p.A95T,ENSCAFG00000001216.4:ENSCAFT00000001886.4:exon4:c.G283A:p.A95T,	ENSCAFG00000001216	SLC35D2	AL16-269.1	chr1	70573024	70573024	G	A	tolerated(1)	0/1	41,9	0.222	50
27	nonsynonymous SNV	ENSCAFG00000003901.4:ENSCAFT00000068041.1:exon1:c.G196A:p.A66T,	ENSCAFG00000003901	BCAT2	BCAT2	chr1	107539168	107539168	G	A	deleterious_low_confidence(0)	0/1	27,4	0.129	31
27	nonsynonymous SNV	ENSCAFG00000004357.5:ENSCAFT00000079177.1:exon6:c.C629T:p.T210M,ENSCAFG00000004357.5:ENSCAFT00000071646.1:exon6:c.C773T:p.T258M,ENSCAFG00000004357.5:ENSCAFT00000045979.3:exon6:c.C773T:p.T258M,ENSCAFG00000004357.5:ENSCAFT00000006986.4:exon5:c.C605T:p.T202M,	ENSCAFG00000004357	CCDC61	CCDC61	chr1	109622197	109622197	G	A	tolerated(0.22)	0/1	17,3	0.187	20
27	frameshift deletion	ENSCAFG00000004911.5:ENSCAFT00000083191.1:exon11:c.1198delC:p.P400fs,ENSCAFG00000004911.5:ENSCAFT00000085868.1:exon12:c.1201delC:p.P401fs,ENSCAFG00000004911.5:ENSCAFT00000007920.5:exon13:c.1318delC:p.P440fs,ENSCAFG00000004911.5:ENSCAFT00000069340.1:exon13:c.1270delC:p.P424fs,	ENSCAFG00000004911	POU2F2	POU2F2	chr1	112250714	112250714	C	-	-	0/1	23,5	0.211	28
27	synonymous SNV	ENSCAFG00000006916.4:ENSCAFT00000011104.4:exon6:c.C987T:p.Y329Y,ENSCAFG00000006916.4:ENSCAFT00000064715.1:exon4:c.C381T:p.Y127Y,	ENSCAFG00000006916	ETV2	RBM42	chr1	116971463	116971463	G	A	-	0/1	63,65	0.53	128
27	nonsynonymous SNV	ENSCAFG00000000323.5:ENSCAFT00000083329.1:exon16:c.G2204A:p.R735K,ENSCAFG00000000323.5:ENSCAFT00000091355.1:exon15:c.G2117A:p.R706K,ENSCAFG00000000323.5:ENSCAFT00000000496.5:exon15:c.G2588A:p.R863K,ENSCAFG00000000323.5:ENSCAFT00000093100.1:exon16:c.G2204A:p.R735K,ENSCAFG00000000323.5:ENSCAFT00000086371.1:exon17:c.G2240A:p.R747K,	ENSCAFG00000000323	USP15	USP15	chr10	5622507	5622507	G	A	tolerated(0.41)	0/1	18,12	0.44	30
27	nonsynonymous SNV	ENSCAFG00000001125.6:ENSCAFT00000085148.1:exon30:c.G6791A:p.R2264H,ENSCAFG00000001125.6:ENSCAFT00000001723.6:exon30:c.G6893A:p.R2298H,ENSCAFG00000001125.6:ENSCAFT00000086120.1:exon30:c.G6857A:p.R2286H,ENSCAFG00000001125.6:ENSCAFT00000066651.1:exon30:c.G6725A:p.R2242H,ENSCAFG00000001125.6:ENSCAFT00000065648.1:exon30:c.G6794A:p.R2265H,	ENSCAFG00000001125	EP3--	EP3--	chr10	24078005	24078005	C	T	deleterious_low_confidence(0.01)	0/1	78,4	0.062	82
27	nonsynonymous SNV	ENSCAFG00000001315.4:ENSCAFT00000082510.1:exon6:c.C763A:p.L255M,ENSCAFG00000001315.4:ENSCAFT00000002052.4:exon6:c.C727A:p.L243M,	ENSCAFG00000001315	CTNNA1	CTNNA1	chr11	26343670	26343670	C	A	tolerated(0.06)	0/1	18,3	0.176	21
[truncated: 3,587 more rows]
