# Supplementary material for: The genomic landscape of canine diffuse large B-cell lymphoma identifies distinct subtypes with clinical and therapeutic implications
Source: Research Square preprint supplement (doi:10.21203/rs.3.rs-916612/v1), 2021-09-21
Supplement: Supplementary file 11 [file eba11f43a2a16f97a43765e1.xlsx]

## Sheet: Index
Supplementary Data 9: Gene-set enrichment analysis (GSEA) in cDLBCL based on DDX3X mutational status (mut vs wt).

## Sheet: pos
Positively enriched pathways in DDX3X mutated sample compared to wild-type.
NAME	GS<br> follow link to MSigDB	GS DETAILS	SIZE	ES	NES	NOM p-val	FDR q-val	FWER p-val	RANK AT MAX	LEADING EDGE
ENDEMIC_BL_VS_ABC_DLBCL_UP_PMID31558468	ENDEMIC_BL_VS_ABC_DLBCL_UP_PMID31558468	Details ...	304	0.405559	3.41971	0	0	0	602	tags=96%, list=69%, signal=204%
ENDEMIC_BL_VS_GCB_DLBCL_UP_PMID31558468	ENDEMIC_BL_VS_GCB_DLBCL_UP_PMID31558468	Details ...	302	0.403277	3.26705	0	0	0	602	tags=96%, list=69%, signal=205%
DYSREGULATED_RBPS_ACROSS_15_CANCERS_PMID29298429	DYSREGULATED_RBPS_ACROSS_15_CANCERS_PMID29298429	Details ...	39	0.468652	2.52928	0	0	0	152	tags=54%, list=18%, signal=62%
DOWN_COMPOUND8B_K562_PAWEL	DOWN_COMPOUND8B_K562_PAWEL	Details ...	76	0.318044	2.12258	0	0.0121255	0.05	597	tags=99%, list=69%, signal=289%
SPORADIC_BL_VS_ABC_DLBCL_UP_PMID31558468	SPORADIC_BL_VS_ABC_DLBCL_UP_PMID31558468	Details ...	86	0.299501	2.0714	0	0.0152513	0.077	298	tags=53%, list=34%, signal=73%
SNOR	SNOR	Details ...	4	0.915411	2.04442	0	0.0161223	0.099	76	tags=100%, list=9%, signal=109%
GSE10846_RCHOP-GCB_ETS1_TOP100_DOWN	GSE10846_RCHOP-GCB_ETS1_TOP100_DOWN	Details ...	13	0.518023	1.89535	0.00263158	0.0488597	0.311	332	tags=92%, list=38%, signal=147%
SPORADIC_BL_VS_GCB_DLBCL_UP_PMID31558468	SPORADIC_BL_VS_GCB_DLBCL_UP_PMID31558468	Details ...	76	0.276261	1.83766	0	0.0667827	0.442	588	tags=95%, list=68%, signal=269%
JQ1_MM_UP_PMID21889194	JQ1_MM_UP_PMID21889194	Details ...	4	0.769302	1.67753	0.0174673	0.170975	0.828	61	tags=75%, list=7%, signal=80%
HIGH_TRISOMY12_CLL_VS_OTHERS_ABRUZZO2018HAEMATOLOGICA_SUBMITTED	HIGH_TRISOMY12_CLL_VS_OTHERS_ABRUZZO2018HAEMATOLOGICA_SUBMITTED	Details ...	13	0.44134	1.64715	0.0491329	0.187922	0.885	147	tags=46%, list=17%, signal=55%
LOWMETHYLATED_AND_UPREGULATED_GENES_BY_DECITABINE_IN SMZL_CELL_LINES_PMID25612624	LOWMETHYLATED_AND_UPREGULATED_GENES_BY_DECITABINE_IN SMZL_CELL_LINES_PMID25612624	Details ...	8	0.508004	1.52366	0.0719794	0.340974	0.982	347	tags=88%, list=40%, signal=145%
DOWN_DASATINIB_K562_PAWEL	DOWN_DASATINIB_K562_PAWEL	Details ...	35	0.28403	1.50994	0.0518518	0.33459	0.985	470	tags=80%, list=54%, signal=168%
PQR309_ABC_DLBCL_DOWN_PMID29066507	PQR309_ABC_DLBCL_DOWN_PMID29066507	Details ...	20	0.349469	1.49926	0.0721003	0.326151	0.989	570	tags=100%, list=66%, signal=285%
GSE10846_RCHOP-ABC_ETS1_TOP100_DOWN	GSE10846_RCHOP-ABC_ETS1_TOP100_DOWN	Details ...	9	0.475845	1.49791	0.0632911	0.303885	0.989	384	tags=89%, list=44%, signal=158%
PIMASERTIB_DOWN_OCILY10_PMID26961147	PIMASERTIB_DOWN_OCILY10_PMID26961147	Details ...	5	0.595178	1.46879	0.10049	0.327247	0.993	246	tags=80%, list=28%, signal=111%
BAY1238097_DLBCL_DOWN_PMID28653353	BAY1238097_DLBCL_DOWN_PMID28653353	Details ...	20	0.349469	1.46849	0.0738462	0.30713	0.993	570	tags=100%, list=66%, signal=285%
IDELALISIB_ABC_DLBCL_DOWN_PMID29066507	IDELALISIB_ABC_DLBCL_DOWN_PMID29066507	Details ...	18	0.348645	1.4668	0.0703812	0.291412	0.993	570	tags=100%, list=66%, signal=286%
HIGH_TRISOMY12_CLL_VS_13Q_MINUS_ABRUZZO2018HAEMATOLOGICA_SUBMITTED	HIGH_TRISOMY12_CLL_VS_13Q_MINUS_ABRUZZO2018HAEMATOLOGICA_SUBMITTED	Details ...	10	0.437475	1.4625	0.0851064	0.280644	0.994	295	tags=70%, list=34%, signal=105%
DOWN_RITUXIMAB_PLUS_ACADESINE_MCL_JEKO1_PMID24519895	DOWN_RITUXIMAB_PLUS_ACADESINE_MCL_JEKO1_PMID24519895	Details ...	10	0.426866	1.41604	0.119481	0.329885	0.999	272	tags=70%, list=31%, signal=101%
PQR309_GCB_DLBCL_UP_PMID29066507	PQR309_GCB_DLBCL_UP_PMID29066507	Details ...	9	0.455587	1.4133	0.120548	0.317893	0.999	115	tags=44%, list=13%, signal=51%
GSE10846_CHOP-GCB_ETS1_TOP100_UP	GSE10846_CHOP-GCB_ETS1_TOP100_UP		9	0.441695	1.36435	0.140741	0.377839	1	190	tags=56%, list=22%, signal=70%
GENES_WITH_SPIB_CHIP-SEQ_PEAKS_IN_ABC_DLBCL_OCILY10_PMID24875472	GENES_WITH_SPIB_CHIP-SEQ_PEAKS_IN_ABC_DLBCL_OCILY10_PMID24875472		6	0.509201	1.35408	0.150485	0.375325	1	91	tags=50%, list=10%, signal=55%
CHK1_RES_JEKO_DOWN_PMID26439697	CHK1_RES_JEKO_DOWN_PMID26439697		10	0.402874	1.30038	0.164975	0.444891	1	307	tags=70%, list=35%, signal=107%
IDELALISIB_ABC_DLBCL_UP_PMID29066507	IDELALISIB_ABC_DLBCL_UP_PMID29066507		5	0.500834	1.23868	0.219955	0.539092	1	304	tags=80%, list=35%, signal=122%
DN_IN_NMZL_VS_FL_ARRIBAS_BLOOD2012	DN_IN_NMZL_VS_FL_ARRIBAS_BLOOD2012		13	0.337702	1.23524	0.227405	0.523455	1	134	tags=38%, list=15%, signal=45%
NCOUNTER_VANTAGE_RNA_INTRACELLULAR_SIGNALING_PANEL	NCOUNTER_VANTAGE_RNA_INTRACELLULAR_SIGNALING_PANEL		5	0.491668	1.21384	0.237557	0.544225	1	120	tags=60%, list=14%, signal=69%
JQ1_SIGNATURE_PMID27099234	JQ1_SIGNATURE_PMID27099234		7	0.42525	1.2054	0.230952	0.539814	1	20	tags=29%, list=2%, signal=29%
PQR309_ABC_DLBCL_UP_PMID29066507	PQR309_ABC_DLBCL_UP_PMID29066507		9	0.380944	1.19079	0.265664	0.547425	1	304	tags=78%, list=35%, signal=119%
NCOUNTER_VANTAGE_RNA_ADAPTIVE_IMMUNITY_PANEL	NCOUNTER_VANTAGE_RNA_ADAPTIVE_IMMUNITY_PANEL		8	0.394648	1.17583	0.247664	0.556488	1	63	tags=38%, list=7%, signal=40%
GENES_OVERLAPPING_IRF4_SPIB_BIOTAG_CHIP-SEQ_PEAKS_IN_ABC_DLBCL_HBL1_PMID27799566	GENES_OVERLAPPING_IRF4_SPIB_BIOTAG_CHIP-SEQ_PEAKS_IN_ABC_DLBCL_HBL1_PMID27799566		7	0.413453	1.17053	0.28392	0.547178	1	294	tags=71%, list=34%, signal=107%
GENES_UP_JQ1_BPDCN_TABLES6_PMID27846392	GENES_UP_JQ1_BPDCN_TABLES6_PMID27846392		6	0.434379	1.15817	0.286052	0.551616	1	492	tags=100%, list=57%, signal=230%
E3_UBIQUITIN_PROTEIN_LIGASES_PMID30134175	E3_UBIQUITIN_PROTEIN_LIGASES_PMID30134175		5	0.471397	1.14961	0.293722	0.549475	1	331	tags=80%, list=38%, signal=129%
PIXANTRONE_HIGH_SENSITIVE_GCB_DLBCL	PIXANTRONE_HIGH_SENSITIVE_GCB_DLBCL		14	0.309496	1.1463	0.281843	0.538752	1	602	tags=100%, list=69%, signal=322%
DOWN_PI3K_INHIBITOR_PMID28528867	DOWN_PI3K_INHIBITOR_PMID28528867		10	0.345391	1.13772	0.300275	0.536975	1	570	tags=100%, list=66%, signal=289%
LOW_IN_CLL_VS_NORMAL_PMID24265505	LOW_IN_CLL_VS_NORMAL_PMID24265505		13	0.318004	1.13673	0.278061	0.523033	1	387	tags=69%, list=45%, signal=123%
HIGH_IN_CLL_CLUSTER2_VS_CLUSTER1_PMID24265505	HIGH_IN_CLL_CLUSTER2_VS_CLUSTER1_PMID24265505		16	0.272109	1.06319	0.364458	0.642134	1	107	tags=31%, list=12%, signal=35%
NCOUNTER_METABOLIC_PATHWAYS_PANEL	NCOUNTER_METABOLIC_PATHWAYS_PANEL		18	0.247112	1.05078	0.378125	0.649562	1	306	tags=61%, list=35%, signal=92%
HIGHMETHYLATED_AND_DOWNREGULATED_GENES_IN_SMZLHIGHM_VS_SMZLLOWM_PMID25612624	HIGHMETHYLATED_AND_DOWNREGULATED_GENES_IN_SMZLHIGHM_VS_SMZLLOWM_PMID25612624		4	0.46558	1.04045	0.421978	0.65186	1	0	tags=25%, list=0%, signal=25%
ITFA_UP_DLBCL_TOP250_PMID25671298	ITFA_UP_DLBCL_TOP250_PMID25671298		11	0.283432	0.99699	0.447439	0.716219	1	107	tags=36%, list=12%, signal=41%
HTG_PAN_BCELL_LYMPHOMA_PANEL	HTG_PAN_BCELL_LYMPHOMA_PANEL		14	0.258953	0.973773	0.464286	0.74225	1	50	tags=21%, list=6%, signal=22%
CYCLOPS_GENES_TABLES4_PMID28753431	CYCLOPS_GENES_TABLES4_PMID28753431		9	0.311189	0.968761	0.501241	0.733358	1	599	tags=100%, list=69%, signal=320%
UP_IN_SMZL_VS_SPLEEN_ARRIBAS_MODPATHOL2013	UP_IN_SMZL_VS_SPLEEN_ARRIBAS_MODPATHOL2013		12	0.272337	0.967315	0.491525	0.718423	1	435	tags=92%, list=50%, signal=181%
PIXANTRONE_HIGH_RESISTANT_GCB_DLBCL	PIXANTRONE_HIGH_RESISTANT_GCB_DLBCL		14	0.258597	0.964542	0.511834	0.706416	1	304	tags=64%, list=35%, signal=97%
HTG_DLBCL_COO	HTG_DLBCL_COO		5	0.384412	0.941729	0.505593	0.731856	1	221	tags=60%, list=25%, signal=80%
CHIP_FLI1_LY1	CHIP_FLI1_LY1		9	0.284758	0.908686	0.553659	0.774793	1	315	tags=67%, list=36%, signal=104%
GENES_UP_AFTER_IRF4_KNOCKDOWN_IN_ABC_DLBCL_HBL1_PMID27799566	GENES_UP_AFTER_IRF4_KNOCKDOWN_IN_ABC_DLBCL_HBL1_PMID27799566		10	0.270276	0.905656	0.57337	0.763063	1	0	tags=10%, list=0%, signal=10%
AZD5363_UP_DLBCL_PMID28202458	AZD5363_UP_DLBCL_PMID28202458		7	0.319356	0.901543	0.57346	0.75354	1	314	tags=71%, list=36%, signal=111%
CHK1_RES_JEKO_UP_PMID26439697	CHK1_RES_JEKO_UP_PMID26439697		7	0.311501	0.901259	0.576923	0.738462	1	98	tags=43%, list=11%, signal=48%
CHIP_FLI1_VAL	CHIP_FLI1_VAL		7	0.322993	0.899712	0.569149	0.726104	1	315	tags=71%, list=36%, signal=111%
OXPHOS_DLBCL_GENES_PMID15550490	OXPHOS_DLBCL_GENES_PMID15550490		13	0.243199	0.898169	0.604336	0.714211	1	337	tags=62%, list=39%, signal=99%
IFN_GENES_REPRESSED_BYIRF4_SPIB_PMID27799566	IFN_GENES_REPRESSED_BYIRF4_SPIB_PMID27799566		6	0.338022	0.897207	0.585366	0.701544	1	270	tags=67%, list=31%, signal=96%
GSE10846_CHOP-ABC_ETS1_TOP100_UP	GSE10846_CHOP-ABC_ETS1_TOP100_UP		5	0.353621	0.886777	0.571429	0.704399	1	430	tags=80%, list=50%, signal=158%
ITFB_UP_DLBCL_TOP250_PMID25671298	ITFB_UP_DLBCL_TOP250_PMID25671298		9	0.28286	0.87859	0.613208	0.704458	1	95	tags=33%, list=11%, signal=37%
ESSENTIAL_GENES_TABLES3_PMID28753431	ESSENTIAL_GENES_TABLES3_PMID28753431		7	0.310465	0.878173	0.616307	0.692069	1	599	tags=100%, list=69%, signal=321%
NCOUNTER_VANTAGE_3D_RNA_HEME_PANEL	NCOUNTER_VANTAGE_3D_RNA_HEME_PANEL		6	0.264969	0.723618	0.793017	0.893926	1	236	tags=50%, list=27%, signal=68%
CD37_POS_CORR_TOP100_GSE10846_CHOP_GCB	CD37_POS_CORR_TOP100_GSE10846_CHOP_GCB		8	0.23539	0.718773	0.797066	0.883565	1	147	tags=38%, list=17%, signal=45%
UPREGULATED_IN_KMT2D_KO_C_1-CRE_MOUSE_PMID26366712	UPREGULATED_IN_KMT2D_KO_C_1-CRE_MOUSE_PMID26366712		4	0.317579	0.715963	0.802603	0.871358	1	32	tags=25%, list=4%, signal=26%
COPANLISIB_HAIRM_TOP200DOWN	COPANLISIB_HAIRM_TOP200DOWN		10	0.188377	0.642993	0.878173	0.934151	1	11	tags=10%, list=1%, signal=10%
DN_IN_NMZL_VS_LYMPHNODE_ARRIBAS_BLOOD2012	DN_IN_NMZL_VS_LYMPHNODE_ARRIBAS_BLOOD2012		4	0.279451	0.628696	0.899329	0.93158	1	313	tags=75%, list=36%, signal=117%
LOWMETHYLATED_GENES_IN_SMZLHIGHM_VS_SMZLLOWM_PMID25612624	LOWMETHYLATED_GENES_IN_SMZLHIGHM_VS_SMZLLOWM_PMID25612624		9	0.195551	0.609389	0.911168	0.932452	1	299	tags=56%, list=34%, signal=84%
UP_CIGLITAZONE_OVARIAN_CANCER_CELL_LINES_PMID17032502	UP_CIGLITAZONE_OVARIAN_CANCER_CELL_LINES_PMID17032502		12	0.121248	0.440761	1	0.995206	1	534	tags=83%, list=62%, signal=214%

## Sheet: neg
Negatively enriched pathways in DDX3X mutated sample compared to wild-type.
NAME	GS<br> follow link to MSigDB	GS DETAILS	SIZE	ES	NES	NOM p-val	FDR q-val	FWER p-val	RANK AT MAX	LEADING EDGE
NCOUNTER_PANCANCER_PROGRESSION_PANEL	NCOUNTER_PANCANCER_PROGRESSION_PANEL	Details ...	45	-0.643029	-2.87689	0	0	0	207	tags=73%, list=24%, signal=91%
ENDEMIC_BL_VS_ABC_DLBCL_DOWN_PMID31558468	ENDEMIC_BL_VS_ABC_DLBCL_DOWN_PMID31558468	Details ...	178	-0.442204	-2.48785	0	0	0	253	tags=54%, list=29%, signal=61%
NCOUNTER_PAN_CANCER_PATHWAYS_PANEL	NCOUNTER_PAN_CANCER_PATHWAYS_PANEL	Details ...	35	-0.580949	-2.48098	0	0	0	215	tags=69%, list=25%, signal=88%
ENDEMIC_BL_VS_GCB_DLBCL_DOWN_PMID31558468	ENDEMIC_BL_VS_GCB_DLBCL_DOWN_PMID31558468	Details ...	184	-0.432431	-2.446	0	0	0	253	tags=54%, list=29%, signal=60%
ARV-771_UP_22RV1_PMID29764999	ARV-771_UP_22RV1_PMID29764999	Details ...	60	-0.491511	-2.32586	0	0.000215517	0.001	224	tags=60%, list=26%, signal=75%
SENESCENCE-REPRESSED_PMID27099234	SENESCENCE-REPRESSED_PMID27099234	Details ...	12	-0.763987	-2.30956	0	0.000179598	0.001	70	tags=83%, list=8%, signal=89%
NCOUNTER_VANTAGE_RNA_WNT_PATHWAYS_PANEL	NCOUNTER_VANTAGE_RNA_WNT_PATHWAYS_PANEL	Details ...	11	-0.761143	-2.28765	0	0.000580721	0.004	127	tags=73%, list=15%, signal=84%
NCOUNTER_TUMOR_SIGNALING_360_PANEL	NCOUNTER_TUMOR_SIGNALING_360_PANEL	Details ...	29	-0.560068	-2.21976	0	0.000896621	0.007	207	tags=66%, list=24%, signal=83%
HTG_OBP	HTG_OBP	Details ...	111	-0.407205	-2.16068	0	0.00160593	0.013	200	tags=43%, list=23%, signal=49%
UP_DASATINIB_CANCER_ASSOCIATED_FIBROBLASTS_PMID20579391	UP_DASATINIB_CANCER_ASSOCIATED_FIBROBLASTS_PMID20579391	Details ...	9	-0.760576	-2.1156	0.0016	0.00285746	0.026	177	tags=89%, list=20%, signal=111%
NCOUNTER_BREAST_CANCER_360_PANEL	NCOUNTER_BREAST_CANCER_360_PANEL	Details ...	25	-0.549297	-2.07686	0.00145138	0.00457734	0.047	199	tags=68%, list=23%, signal=86%
NCOUNTER_VANTAGE_RNA_CELLULAR_PROFILING_PANEL	NCOUNTER_VANTAGE_RNA_CELLULAR_PROFILING_PANEL	Details ...	9	-0.726822	-2.07375	0.00333333	0.0046477	0.052	107	tags=67%, list=12%, signal=75%
IBRUTINIB_UP_CLL_PATIENTS_SUP_DATA5_PMID29259203	IBRUTINIB_UP_CLL_PATIENTS_SUP_DATA5_PMID29259203	Details ...	7	-0.788372	-2.04958	0.00180832	0.00591271	0.069	190	tags=100%, list=22%, signal=127%
EWS1-FLI1-DOWN	EWS1-FLI1-DOWN	Details ...	16	-0.602233	-2.04578	0.00153374	0.00587022	0.073	146	tags=69%, list=17%, signal=81%
NCOUNTER_MYELOID_INNATE_IMMUNITY_V2	NCOUNTER_MYELOID_INNATE_IMMUNITY_V2	Details ...	35	-0.486967	-2.03559	0.0041958	0.00637459	0.084	227	tags=66%, list=26%, signal=85%
IBRUTINIB_DOWN_CLL_PATIENTS_SUP_DATA5_PMID29259203	IBRUTINIB_DOWN_CLL_PATIENTS_SUP_DATA5_PMID29259203	Details ...	20	-0.56882	-2.01865	0.00303951	0.00728203	0.103	201	tags=70%, list=23%, signal=89%
VL51_UP_IN_IDELALISIB_RESISTANT_VS_PARENTAL	VL51_UP_IN_IDELALISIB_RESISTANT_VS_PARENTAL	Details ...	8	-0.746217	-1.94538	0	0.0149868	0.21	227	tags=100%, list=26%, signal=134%
HIGH_IN_TRANSLOCATION_NEGATIVE_MALT_LYMPHOMA_S17_PMID20520640	HIGH_IN_TRANSLOCATION_NEGATIVE_MALT_LYMPHOMA_S17_PMID20520640	Details ...	8	-0.7191	-1.9353	0.00506757	0.015136	0.223	199	tags=88%, list=23%, signal=113%
HTG_IMMUNO_ONCOLOGY_V2	HTG_IMMUNO_ONCOLOGY_V2	Details ...	47	-0.422388	-1.89931	0.00384123	0.02028	0.3	198	tags=49%, list=23%, signal=60%
ONCOKB_CANCER_GENES_ ONCOKB_ORG	ONCOKB_CANCER_GENES_ ONCOKB_ORG	Details ...	43	-0.42553	-1.87709	0.00537634	0.0247716	0.365	228	tags=56%, list=26%, signal=72%
DOWN_NO_DASATINIB_RESPONDERS_CML_PMID23676950	DOWN_NO_DASATINIB_RESPONDERS_CML_PMID23676950		7	-0.732706	-1.86899	0.00495868	0.0260935	0.401	192	tags=86%, list=22%, signal=109%
NCOUNTER_PANCANCER_IO_360_PANEL	NCOUNTER_PANCANCER_IO_360_PANEL		29	-0.461722	-1.86765	0.00690608	0.0253876	0.408	199	tags=55%, list=23%, signal=69%
OTX015_DOWN_22RV1_PMID29764999	OTX015_DOWN_22RV1_PMID29764999		33	-0.433923	-1.81517	0.00671141	0.0400801	0.585	240	tags=61%, list=28%, signal=81%
DOWN_CIGLITAZONE_OVARIAN_CANCER_CELL_LINES_PMID17032502	DOWN_CIGLITAZONE_OVARIAN_CANCER_CELL_LINES_PMID17032502		10	-0.61547	-1.77521	0.0101695	0.0545567	0.709	244	tags=80%, list=28%, signal=110%
HIGH_IN_CLL_CLUSTER1_VS_CLUSTER2_PMID24265505	HIGH_IN_CLL_CLUSTER1_VS_CLUSTER2_PMID24265505		8	-0.669911	-1.77421	0.00961539	0.0527685	0.71	25	tags=38%, list=3%, signal=38%
OTX015_UP_22RV1_PMID29764999	OTX015_UP_22RV1_PMID29764999		17	-0.497487	-1.75299	0.0218409	0.0613017	0.794	243	tags=71%, list=28%, signal=96%
GSE10846_CHOP-GCB_ETS1_TOP100_DOWN	GSE10846_CHOP-GCB_ETS1_TOP100_DOWN		4	-0.829664	-1.75141	0.00545455	0.0594995	0.797	152	tags=100%, list=18%, signal=121%
KARPAS1718_DN_IN_IDELALISIB_RESISTANT_VS_PARENTAL	KARPAS1718_DN_IN_IDELALISIB_RESISTANT_VS_PARENTAL		12	-0.556355	-1.74452	0.014377	0.0604588	0.814	143	tags=58%, list=16%, signal=69%
CANCER_GENES_LIST_HTTP://ONCOKB.ORG_PMID28890946	CANCER_GENES_LIST_HTTP://ONCOKB.ORG_PMID28890946		40	-0.401509	-1.7369	0.00935829	0.0630122	0.842	228	tags=55%, list=26%, signal=71%
DN_IN_SMZL_VS_SPLEEN_ARRIBAS_MODPATHOL2013	DN_IN_SMZL_VS_SPLEEN_ARRIBAS_MODPATHOL2013		13	-0.54527	-1.72901	0.0139535	0.0650379	0.86	204	tags=77%, list=24%, signal=99%
NCOUNTER_HUMAN_NEUROINFLAMMATION_PANEL	NCOUNTER_HUMAN_NEUROINFLAMMATION_PANEL		27	-0.442176	-1.72776	0.0238764	0.0635511	0.861	227	tags=59%, list=26%, signal=78%
CANCER_DRIVER GENES_INTOGEN	CANCER_DRIVER GENES_INTOGEN		20	-0.478932	-1.71284	0.0294551	0.0686401	0.884	206	tags=65%, list=24%, signal=83%
ARAC_RESISTANCE_BESTER2018	ARAC_RESISTANCE_BESTER2018		6	-0.693324	-1.69286	0.0212766	0.077092	0.912	156	tags=83%, list=18%, signal=101%
GENES_UP_I-CBP112_KASUMI1_4DAYS_PMID26552700	GENES_UP_I-CBP112_KASUMI1_4DAYS_PMID26552700		4	-0.806489	-1.67979	0.00931099	0.0823031	0.932	172	tags=100%, list=20%, signal=124%
GENES_DOWN_AFTER_SPIB_KNOCKDOWN_IN_ABC_DLBCL_HBL1_PMID27799566	GENES_DOWN_AFTER_SPIB_KNOCKDOWN_IN_ABC_DLBCL_HBL1_PMID27799566		9	-0.587215	-1.67729	0.0207668	0.0813995	0.936	237	tags=78%, list=27%, signal=106%
VL51_UP_IN_IBRUTINIB_RESISTANT_VS_PARENTAL	VL51_UP_IN_IBRUTINIB_RESISTANT_VS_PARENTAL		4	-0.803079	-1.66915	0.0128205	0.0837081	0.945	62	tags=75%, list=7%, signal=80%
GENES_WITH_SPIB_BIOTAG_CHIP-SEQ_PEAKS_IN_ABC_DLBCL_HBL1_PMID27799566	GENES_WITH_SPIB_BIOTAG_CHIP-SEQ_PEAKS_IN_ABC_DLBCL_HBL1_PMID27799566		7	-0.658166	-1.65864	0.0273973	0.0873531	0.954	213	tags=86%, list=25%, signal=113%
CD37_INV_CORR_TOP100_GSE10846_CHOP_ABC	CD37_INV_CORR_TOP100_GSE10846_CHOP_ABC		9	-0.591487	-1.64827	0.0408472	0.0912443	0.966	206	tags=78%, list=24%, signal=101%
GENES_UP_I-CBP112_SELM_4DAYS_PMID26552700	GENES_UP_I-CBP112_SELM_4DAYS_PMID26552700		4	-0.772885	-1.63433	0.0170648	0.0964969	0.974	201	tags=100%, list=23%, signal=130%
LOWMETHYLATED_GENES_IN_SMZL_VS_NONTUMORALSPLEEN_PMID25612624	LOWMETHYLATED_GENES_IN_SMZL_VS_NONTUMORALSPLEEN_PMID25612624		4	-0.756663	-1.61736	0.0182482	0.106049	0.98	215	tags=100%, list=25%, signal=132%
UP_DASATINIB_K562_PAWEL	UP_DASATINIB_K562_PAWEL		87	-0.309044	-1.5791	0.0225653	0.132504	0.993	237	tags=45%, list=27%, signal=56%
NCOUNTER_HUMAN_NEUROPATHOLOGY_PANEL	NCOUNTER_HUMAN_NEUROPATHOLOGY_PANEL		34	-0.380599	-1.57436	0.0398406	0.133349	0.995	207	tags=47%, list=24%, signal=59%
HIGHMETHYLATED_GENES_IN_SMZL_VS_NONTUMORALSPLEEN_PMID25612624	HIGHMETHYLATED_GENES_IN_SMZL_VS_NONTUMORALSPLEEN_PMID25612624		7	-0.611239	-1.56643	0.0539629	0.137283	0.995	249	tags=86%, list=29%, signal=119%
NOTCH_DOWN_MCL_TABLES2_PMID29045844	NOTCH_DOWN_MCL_TABLES2_PMID29045844		7	-0.622391	-1.54251	0.0490998	0.154901	0.998	248	tags=86%, list=29%, signal=119%
CD37_INV_CORR_TOP100_GSE10846_CHOP_GCB	CD37_INV_CORR_TOP100_GSE10846_CHOP_GCB		8	-0.569658	-1.52935	0.052459	0.163268	0.998	222	tags=75%, list=26%, signal=100%
SPORADIC_BL_VS_GCB_DLBCL_DOWN_PMID31558468	SPORADIC_BL_VS_GCB_DLBCL_DOWN_PMID31558468		49	-0.335001	-1.51777	0.0679095	0.170183	0.998	239	tags=47%, list=28%, signal=61%
GENES_DOWN_AFTER_IRF4_KNOCKDOWN_IN_ABC_DLBCL_HBL1_PMID27799566	GENES_DOWN_AFTER_IRF4_KNOCKDOWN_IN_ABC_DLBCL_HBL1_PMID27799566		7	-0.589185	-1.507	0.0608108	0.1761	0.998	212	tags=71%, list=24%, signal=94%
KARPAS1718_UP_IN_IDELALISIB_RESISTANT_VS_PARENTAL	KARPAS1718_UP_IN_IDELALISIB_RESISTANT_VS_PARENTAL		10	-0.51947	-1.4757	0.0871022	0.204885	0.999	232	tags=70%, list=27%, signal=94%
IMMUNE_DLBCL_GENES_PMID15550490	IMMUNE_DLBCL_GENES_PMID15550490		17	-0.425569	-1.44921	0.106569	0.22867	1	92	tags=35%, list=11%, signal=39%
GENES_DOWN_LENALIDOMIDE_IN_ABC_DLBCL_PMID27799566	GENES_DOWN_LENALIDOMIDE_IN_ABC_DLBCL_PMID27799566		12	-0.463158	-1.43708	0.105828	0.237888	1	162	tags=67%, list=19%, signal=81%
NCOUNTER_PANCANCER_IMMUNE_PROFILING_PANEL	NCOUNTER_PANCANCER_IMMUNE_PROFILING_PANEL		20	-0.401748	-1.42831	0.106667	0.243838	1	198	tags=55%, list=23%, signal=70%
HTG_IMMUNO_ONCOLOGY_V1	HTG_IMMUNO_ONCOLOGY_V1		21	-0.39057	-1.4262	0.109955	0.241219	1	220	tags=52%, list=25%, signal=68%
CENSUS_OF_HUMAN_CANCER_GENES_TABLES1_PMID14993899	CENSUS_OF_HUMAN_CANCER_GENES_TABLES1_PMID14993899		7	-0.53977	-1.40732	0.12709	0.25825	1	192	tags=71%, list=22%, signal=91%
CANCER_GENES_TABLE7_ SABARINATHAN_BIORXIV2017	CANCER_GENES_TABLE7_ SABARINATHAN_BIORXIV2017		10	-0.471314	-1.37107	0.137255	0.298713	1	192	tags=60%, list=22%, signal=76%
UP_RITUXIMAB_PLUS_ACADESINE_MCL_JEKO1_PMID24519895	UP_RITUXIMAB_PLUS_ACADESINE_MCL_JEKO1_PMID24519895		9	-0.488804	-1.34413	0.166129	0.33046	1	107	tags=44%, list=12%, signal=50%
KINASES_DISCOVERX	KINASES_DISCOVERX		14	-0.414984	-1.32865	0.175274	0.346872	1	192	tags=50%, list=22%, signal=63%
RECURRENTLY_AFFECTED_TCGA+MDACC_TABS1B_ PMID29533785	RECURRENTLY_AFFECTED_TCGA+MDACC_TABS1B_ PMID29533785		5	-0.5699	-1.31206	0.18662	0.364421	1	208	tags=80%, list=24%, signal=105%
GENES_WITH_IRF4_CHIP-SEQ_PEAKS_IN_ABC_DLBCL_OCILY3_PMID24875472	GENES_WITH_IRF4_CHIP-SEQ_PEAKS_IN_ABC_DLBCL_OCILY3_PMID24875472		8	-0.488558	-1.30484	0.204319	0.368428	1	2	tags=13%, list=0%, signal=12%
MET500_SUPPRESSORS_PMID28783718	MET500_SUPPRESSORS_PMID28783718		14	-0.410484	-1.29478	0.190108	0.377977	1	222	tags=57%, list=26%, signal=76%
NCOUNTER_INFLAMMATION_V2_PANEL	NCOUNTER_INFLAMMATION_V2_PANEL		8	-0.477467	-1.28852	0.182566	0.380538	1	108	tags=38%, list=12%, signal=42%
ADULT_MBL_MUTATED_GENES_PMID28801451	ADULT_MBL_MUTATED_GENES_PMID28801451		4	-0.611759	-1.28402	0.171053	0.38112	1	223	tags=75%, list=26%, signal=101%
GENES_DOWN_I-CBP112_KASUMI1_4DAYS_PMID26552700	GENES_DOWN_I-CBP112_KASUMI1_4DAYS_PMID26552700		6	-0.521573	-1.27476	0.202773	0.388506	1	146	tags=50%, list=17%, signal=60%
NCOUNTER_INFLAMMATION_PANEL_V2	NCOUNTER_INFLAMMATION_PANEL_V2		8	-0.477467	-1.2676	0.219224	0.393738	1	108	tags=38%, list=12%, signal=42%
NCOUNTER_AUTOIMMUNE_PROFILING_PANEL	NCOUNTER_AUTOIMMUNE_PROFILING_PANEL		29	-0.313097	-1.25931	0.211781	0.400016	1	207	tags=38%, list=24%, signal=48%
BRD4_SIGNATURE_PMID27099234	BRD4_SIGNATURE_PMID27099234		8	-0.462603	-1.25409	0.223906	0.402191	1	127	tags=63%, list=15%, signal=73%
CD37_INV_CORR_TOP100_GSE10846_RCHOP_GCB	CD37_INV_CORR_TOP100_GSE10846_RCHOP_GCB		9	-0.458759	-1.25128	0.206133	0.400613	1	94	tags=33%, list=11%, signal=37%
TUNICAMYCIN_HIGH_DOWN_PMID29453283	TUNICAMYCIN_HIGH_DOWN_PMID29453283		6	-0.507388	-1.2435	0.212803	0.40702	1	118	tags=50%, list=14%, signal=57%
PPARG_ EXPERIMENTALLY_VERIFIED_HUMAN_TARGETS_PMID27148361	PPARG_ EXPERIMENTALLY_VERIFIED_HUMAN_TARGETS_PMID27148361		4	-0.578298	-1.21977	0.244037	0.436199	1	163	tags=75%, list=19%, signal=92%
UP_IN_NMZL_VS_LYMPHNODE_ARRIBAS_BLOOD2012	UP_IN_NMZL_VS_LYMPHNODE_ARRIBAS_BLOOD2012		5	-0.534813	-1.21111	0.259048	0.443511	1	249	tags=80%, list=29%, signal=112%
UP_BY_ANTI-CD20_AND_ANTI-BCR_IN_GCBDLBCL_SUDHL7_PMID21364752	UP_BY_ANTI-CD20_AND_ANTI-BCR_IN_GCBDLBCL_SUDHL7_PMID21364752		9	-0.424781	-1.19679	0.254237	0.460189	1	212	tags=56%, list=24%, signal=73%
GENES_WITH_IRF4_SPIB_CHIP-SEQ_PEAKS_IN_ABC_DLBCL_OCILY10_PMID24875472	GENES_WITH_IRF4_SPIB_CHIP-SEQ_PEAKS_IN_ABC_DLBCL_OCILY10_PMID24875472		5	-0.515644	-1.19364	0.271881	0.458548	1	95	tags=40%, list=11%, signal=45%
IBRUTINIB_ABC_DLBCL_DOWN_PMID29066507	IBRUTINIB_ABC_DLBCL_DOWN_PMID29066507		9	-0.437063	-1.18785	0.254072	0.461672	1	493	tags=100%, list=57%, signal=229%
BCR_DLBCL_GENES_PMID15550490	BCR_DLBCL_GENES_PMID15550490		5	-0.507819	-1.16668	0.301587	0.489534	1	24	tags=20%, list=3%, signal=20%
P65_SIGNATURE_PMID27099234	P65_SIGNATURE_PMID27099234		7	-0.459183	-1.15678	0.284192	0.498663	1	40	tags=43%, list=5%, signal=45%
NCOUNTER_VANTAGE_RNA_INNATE_IMMUNITY_PANEL	NCOUNTER_VANTAGE_RNA_INNATE_IMMUNITY_PANEL		5	-0.507738	-1.15168	0.306273	0.500116	1	6	tags=20%, list=1%, signal=20%
NFKB_GENES_INDUCED_BYIRF4_SPIB_PMID27799566	NFKB_GENES_INDUCED_BYIRF4_SPIB_PMID27799566		8	-0.436554	-1.15001	0.278481	0.496234	1	493	tags=100%, list=57%, signal=230%
JQ1_CD4T_DN	JQ1_CD4T_DN		5	-0.498047	-1.14313	0.320896	0.500491	1	228	tags=80%, list=26%, signal=108%
GENES_DOWN_JQ1_BPDCN_TABLES6_PMID27846392	GENES_DOWN_JQ1_BPDCN_TABLES6_PMID27846392		23	-0.303375	-1.13047	0.334835	0.513719	1	224	tags=43%, list=26%, signal=57%
IRE1/XBP1S_TARGETS_MOLINARI	IRE1/XBP1S_TARGETS_MOLINARI		8	-0.418086	-1.13018	0.340909	0.507696	1	5	tags=13%, list=1%, signal=12%
GENES_WITH_IRF4_CHIP-SEQ_PEAKS_IN_ABC_DLBCL_HBL1_PMID27799566	GENES_WITH_IRF4_CHIP-SEQ_PEAKS_IN_ABC_DLBCL_HBL1_PMID27799566		6	-0.471476	-1.12659	0.311774	0.50743	1	8	tags=17%, list=1%, signal=17%
EWS1-FLI1-UP	EWS1-FLI1-UP		12	-0.360475	-1.12527	0.342949	0.503217	1	153	tags=33%, list=18%, signal=40%
UP_COMPOUND8B_K562_PAWEL	UP_COMPOUND8B_K562_PAWEL		128	-0.20968	-1.12286	0.298109	0.500791	1	251	tags=38%, list=29%, signal=46%
SPORADIC_BL_VS_ABC_DLBCL_DOWN_PMID31558468	SPORADIC_BL_VS_ABC_DLBCL_DOWN_PMID31558468		49	-0.244365	-1.1205	0.335476	0.498466	1	239	tags=41%, list=28%, signal=53%
GARNETT_PI3K_SENSITIVITY_SIGNATURE_PMID28528867	GARNETT_PI3K_SENSITIVITY_SIGNATURE_PMID28528867		11	-0.36346	-1.10977	0.335385	0.509294	1	195	tags=45%, list=22%, signal=58%
THAPSIGARGIN_LOW_UP_PMID29453283	THAPSIGARGIN_LOW_UP_PMID29453283		10	-0.375179	-1.09369	0.363057	0.528236	1	163	tags=40%, list=19%, signal=49%
DOWN_DASATINIB_CANCER_ASSOCIATED_FIBROBLASTS_PMID20579391	DOWN_DASATINIB_CANCER_ASSOCIATED_FIBROBLASTS_PMID20579391		8	-0.391234	-1.05557	0.401305	0.582661	1	5	tags=13%, list=1%, signal=12%
UP_PI3K_INHIBITOR_PMID28528867	UP_PI3K_INHIBITOR_PMID28528867		14	-0.319812	-1.03901	0.404908	0.602364	1	226	tags=43%, list=26%, signal=57%
KINASES_TABS1_PMID12471243	KINASES_TABS1_PMID12471243		15	-0.315604	-1.02953	0.43871	0.610908	1	192	tags=40%, list=22%, signal=50%
DOWNREGULATED_GENES_BY_DECITABINE_IN SMZL_CELL_LINES_PMID25612624	DOWNREGULATED_GENES_BY_DECITABINE_IN SMZL_CELL_LINES_PMID25612624		4	-0.481373	-1.01625	0.469203	0.625297	1	239	tags=75%, list=28%, signal=103%
CHIP_FLI1_U2932	CHIP_FLI1_U2932		8	-0.37226	-1.01507	0.433058	0.620274	1	243	tags=50%, list=28%, signal=69%
UPREGULATED_IN_BENDAMUSTINE_CLL_PMID26701728	UPREGULATED_IN_BENDAMUSTINE_CLL_PMID26701728		9	-0.344325	-0.972315	0.496743	0.683251	1	227	tags=56%, list=26%, signal=74%
NCOUNTER_IMMUNOLOGY_PANEL_V2	NCOUNTER_IMMUNOLOGY_PANEL_V2		13	-0.302069	-0.958937	0.501538	0.697725	1	198	tags=46%, list=23%, signal=59%
CD205_CORRELATED_GENES	CD205_CORRELATED_GENES		14	-0.294956	-0.948976	0.521395	0.706578	1	85	tags=21%, list=10%, signal=23%
DOWNREUGLATED_IN_FL_WITH_KMT2D_MUTATIONS_PMID26366710	DOWNREUGLATED_IN_FL_WITH_KMT2D_MUTATIONS_PMID26366710		11	-0.324636	-0.942461	0.54515	0.709649	1	207	tags=45%, list=24%, signal=59%
PERK/ATF4_TARGETS_MOLINARI	PERK/ATF4_TARGETS_MOLINARI		4	-0.451148	-0.94129	0.543636	0.704099	1	303	tags=75%, list=35%, signal=115%
GENES_WITH_SPIB_CHIP-SEQ_PEAKS_IN_ABC_DLBCL_OCILY3_PMID24875472	GENES_WITH_SPIB_CHIP-SEQ_PEAKS_IN_ABC_DLBCL_OCILY3_PMID24875472		4	-0.449998	-0.939544	0.548951	0.699687	1	270	tags=75%, list=31%, signal=108%
NOTCH_UP_MCL_TABLES2_PMID29045844	NOTCH_UP_MCL_TABLES2_PMID29045844		29	-0.234768	-0.936116	0.560734	0.69786	1	206	tags=31%, list=24%, signal=39%
MSK-IMPACT_2_GENE_LIST_PMID28481359	MSK-IMPACT_2_GENE_LIST_PMID28481359		13	-0.287358	-0.931814	0.519048	0.697604	1	198	tags=46%, list=23%, signal=59%
IL6_IL10_STAT3_GENES_REPRESSED_BYIRF4_SPIB_PMID27799566	IL6_IL10_STAT3_GENES_REPRESSED_BYIRF4_SPIB_PMID27799566		7	-0.355613	-0.907922	0.577303	0.727386	1	163	tags=43%, list=19%, signal=52%
ST7612AA1_UP_DLBCL_PMID25671299	ST7612AA1_UP_DLBCL_PMID25671299		8	-0.342253	-0.902095	0.59292	0.729006	1	233	tags=63%, list=27%, signal=85%
HIGH_IN_CLL_VS_NORMAL_PMID24265505	HIGH_IN_CLL_VS_NORMAL_PMID24265505		6	-0.360227	-0.881138	0.631399	0.753692	1	19	tags=17%, list=2%, signal=17%
DOWN_BY_ANTI-CD20_AND_ANTI-BCR_IN_MCL_REC1_PMID21364752	DOWN_BY_ANTI-CD20_AND_ANTI-BCR_IN_MCL_REC1_PMID21364752		6	-0.353737	-0.870421	0.62254	0.762959	1	25	tags=17%, list=3%, signal=17%
PLASMACYTOID DENDRITIC CELL_GENES_INDUCED_BYIRF4_SPIB_PMID27799566	PLASMACYTOID DENDRITIC CELL_GENES_INDUCED_BYIRF4_SPIB_PMID27799566		7	-0.326097	-0.846567	0.639085	0.792684	1	223	tags=57%, list=26%, signal=76%
CD37_INV_CORR_TOP100_GSE10846_RCHOP_ABC	CD37_INV_CORR_TOP100_GSE10846_RCHOP_ABC		13	-0.261403	-0.827044	0.625387	0.814915	1	80	tags=15%, list=9%, signal=17%
AZD8835_DOWN_ABCDLBCL_PMID28202458	AZD8835_DOWN_ABCDLBCL_PMID28202458		6	-0.332178	-0.811077	0.677311	0.830174	1	425	tags=83%, list=49%, signal=162%
GENES_UP_LENALIDOMIDE_IN_ABC_DLBCL_PMID27799566	GENES_UP_LENALIDOMIDE_IN_ABC_DLBCL_PMID27799566		14	-0.249582	-0.810056	0.668721	0.82377	1	126	tags=21%, list=15%, signal=25%
PIMASERTIB_UP_OCILY10_PMID26961147	PIMASERTIB_UP_OCILY10_PMID26961147		11	-0.269571	-0.807817	0.707882	0.819389	1	508	tags=91%, list=59%, signal=217%
LOWMETHYLATED_GENES_BY_DECITABINE_IN SMZL_CELL_LINES_PMID25612624	LOWMETHYLATED_GENES_BY_DECITABINE_IN SMZL_CELL_LINES_PMID25612624		17	-0.227576	-0.770602	0.744776	0.862856	1	101	tags=18%, list=12%, signal=20%
GENES_UP_AFTER_SPIB_KNOCKDOWN_IN_ABC_DLBCL_HBL1_PMID27799566	GENES_UP_AFTER_SPIB_KNOCKDOWN_IN_ABC_DLBCL_HBL1_PMID27799566		5	-0.322621	-0.740015	0.802102	0.895095	1	163	tags=40%, list=19%, signal=49%
NCOUNTER_VANTAGE_RNA_PANEL_FOR_DNA_DAMAGE_AND_REPAIR	NCOUNTER_VANTAGE_RNA_PANEL_FOR_DNA_DAMAGE_AND_REPAIR		7	-0.277907	-0.730798	0.79046	0.899013	1	629	tags=100%, list=73%, signal=361%
ST7612AA1_DOWN_DLBCL_PMID25671299	ST7612AA1_DOWN_DLBCL_PMID25671299		12	-0.238439	-0.727889	0.799674	0.894261	1	25	tags=8%, list=3%, signal=8%
NCOUNTER_CART_CHARACTERIZATION_PANEL	NCOUNTER_CART_CHARACTERIZATION_PANEL		19	-0.20333	-0.720427	0.771261	0.89562	1	39	tags=11%, list=4%, signal=11%
ESSENTIAL_DBCL_GENES_PMID31558468	ESSENTIAL_DBCL_GENES_PMID31558468		17	-0.193927	-0.671012	0.84139	0.943414	1	65	tags=12%, list=7%, signal=12%
PQR309_GCB_DLBCL_DOWN_PMID29066507	PQR309_GCB_DLBCL_DOWN_PMID29066507		16	-0.19389	-0.651924	0.869499	0.954624	1	703	tags=100%, list=81%, signal=519%
DOWNREGULATED_IN_BENDAMUSTINE_CLL_PMID26701728	DOWNREGULATED_IN_BENDAMUSTINE_CLL_PMID26701728		15	-0.195565	-0.640539	0.880691	0.956798	1	264	tags=47%, list=30%, signal=66%
TUNICAMYCIN_HIGH_UP_PMID29453283	TUNICAMYCIN_HIGH_UP_PMID29453283		5	-0.277465	-0.63604	0.868113	0.952806	1	68	tags=20%, list=8%, signal=22%
OTX015_ALCL_UP_PMID27793034	OTX015_ALCL_UP_PMID27793034		9	-0.22851	-0.633199	0.868132	0.947044	1	237	tags=44%, list=27%, signal=61%
MET500_ONCOGENES_PMID28783718	MET500_ONCOGENES_PMID28783718		10	-0.220023	-0.631926	0.886207	0.940177	1	229	tags=40%, list=26%, signal=54%
GSE10846_CHOP-ABC_ETS1_TOP100_DOWN	GSE10846_CHOP-ABC_ETS1_TOP100_DOWN		5	-0.272622	-0.621547	0.900356	0.941181	1	633	tags=100%, list=73%, signal=368%
MUTSIG_GENES_TABLES2_PMID29625050	MUTSIG_GENES_TABLES2_PMID29625050		6	-0.247045	-0.599172	0.905565	0.951564	1	480	tags=83%, list=55%, signal=185%
ESSENTIAL_BL_GENES_PMID31558468	ESSENTIAL_BL_GENES_PMID31558468		23	-0.156605	-0.58941	0.912732	0.951598	1	8	tags=4%, list=1%, signal=4%
GENES_REPRESSED_BYIRF4_SPIB_GCB_DLBCL_PMID27799566	GENES_REPRESSED_BYIRF4_SPIB_GCB_DLBCL_PMID27799566		5	-0.251204	-0.570782	0.939286	0.957234	1	218	tags=40%, list=25%, signal=53%
HIGHMETHYLATED_GENES_IN_SMZLHIGHM_VS_SMZLLOWM_PMID25612624	HIGHMETHYLATED_GENES_IN_SMZLHIGHM_VS_SMZLLOWM_PMID25612624		6	-0.227183	-0.5583	0.945455	0.957184	1	69	tags=17%, list=8%, signal=18%
GENES_DOWN_JQ1_MELANOMA_TABLES1_PMID29149598	GENES_DOWN_JQ1_MELANOMA_TABLES1_PMID29149598		45	-0.110781	-0.49479	0.976714	0.980999	1	243	tags=31%, list=28%, signal=41%
ARV-771_DOWN_22RV1_PMID29764999	ARV-771_DOWN_22RV1_PMID29764999		169	-0.0524984	-0.290967	1	0.999942	1	549	tags=71%, list=63%, signal=156%
