# Supplementary material for: The genomic landscape of canine diffuse large B-cell lymphoma identifies distinct subtypes with clinical and therapeutic implications
Source: Research Square preprint supplement (doi:10.21203/rs.3.rs-916612/v1), 2021-09-21
Supplement: Supplementary file 13 [file f59311738346011553d3491a.xlsx]

## Sheet: Foglio1
Supplementary Data 13: TP53 mutations identified in the validation cohort of 56 cDLBCLs.
Sample ID#	Start	Stop	Ref	Alt	Consequence	CDS	Protein	dbSNP	SIFT	Origin
79	32562969	32562969	G	A	missense	c.G1060A	p.G354R	-	tolerated (0.1)	Germline
80	32563416	32563416	A	C	missense	c.A874C	p.S292R	-	deleterious (0.01)	Somatic
82	32563388	32563388	G	A	missense	c.G902A	p.R301Q	rs851620436	deleterious (0.00)	Somatic
84	32563754	32563755	TT	-	frameshift deletion	c.757delTT	p.L253fs	-	-	Somatic
94	32563017	32563017	G	A	missense	c.G1012A	p.E338K	-	deleterious (0.00)	Somatic
95	32563967	32563967	G	A	missense	c.G626A	p.R209H	-	deleterious (0.05)	Somatic
97	32563710	32563710	G	A	missense	c.G802A	p.V268M	-	deleterious (0.00)	Somatic
99	32563091	32563091	G	A	splice acceptor	c.939-1G>A	-	-	-	Somatic
100	32563056	32563056	C	T	missense	c.C973T	p.R325C	rs852416666	deleterious (0.00)	Germline
103	32563073	32563073	G	A	missense	c.G956A	p.R319H	-	deleterious (0.04)	Somatic
110	32563904	32563904	A	G	missense	c.A689G	p.H230R	-	deleterious (0.00)	Somatic
117	32563715	32563715	-	A	frameshift insertion	c.797insA	p.H266fs	-	-	Somatic
122	32562969	32562969	G	A	missense	c.G1060A	p.G354R	-	tolerated (0.1)	Germline
125	32563778	32563778	A	C	missense	c.A734C	p.H245P	-	deleterious (0.00)	Somatic
130	32563028	32563028	G	A	missense	c.G1001A	p.R334H	rs852440243	deleterious (0.02)	Somatic
