# Supplementary material for: The genomic landscape of canine diffuse large B-cell lymphoma identifies distinct subtypes with clinical and therapeutic implications
Source: Research Square preprint supplement (doi:10.21203/rs.3.rs-916612/v1), 2021-09-21
Supplement: Supplementary file 15 [file 12da24ff638fe8409ad12892.xlsx]

## Sheet: Foglio1
Supplementary Data 1: Clinical details for the 77 dogs with DLBCL sequenced in this study.
# Sample ID	SEQUENCING ANALYSIS			DIAGNOSIS	BREED	BREED (Pure/Mixed)	AGE (years)	AGE (Young <10/Old ≥10)	SEX	WEIGHT (kg)	WEIGHT (Under <10kg/Over ≥10kg)	STAGE	SUBSTAGE	BM infiltration (%)	BM infiltration (Yes/No)	BLOOD infiltration (%)	LDH	PRETREATMENT WITH STEROIDS	TREATMENT	TTP	LSS
1	WES			DLBCL	German shepherd	Pure	6	Young	F	32.6	Over	5	a	2.5	No	1.6	Normal	No	CH-IM	351	435
2	WES	RNA-Seq	WGS	DLBCL	Mixed	Mixed	6	Young	M	24	Over	5	b	47.4	Yes	1.9	Increased	Yes	CH-IM	69	71
3	WES			DLBCL	Bullmastiff	Pure	7	Young	F	43	Over	4	a	0.9	No	0.9	Normal	No	CH	44	266
4	WES			DLBCL	Dachshund	Pure	7	Young	F	7.36	Under	5	a	2.1	No	40.9	Increased	No	CH-IM	246	757
5	WES			DLBCL	Rottweiler	Pure	4	Young	M	35.8	Over	5	b	1.7	No	3.9	Normal	No	CH	118	190
6	WES	RNA-Seq	WGS	DLBCL	Mixed	Mixed	6	Young	M	37.6	Over	5	a	3.5	Yes	1	Normal	No	CH-IM	588	767
7	WES		WGS	DLBCL	Whwt	Pure	9	Young	M	8.8	Under	5	b	5	Yes	3.9	Normal	No	CH-IM	385	979
8	WES			DLBCL	German shepherd	Pure	4	Young	M	45	Over	4	b	0.9	No	0.9	Normal	No	CH-IM	35	36
9	WES	RNA-Seq		DLBCL	German shepherd	Pure	9	Young	F	33.1	Over	5	a	50	Yes	10	Increased	No	CH	34	41
10	WES			DLBCL	Mixed	Mixed	12	Old	F	33.6	Over	5	a	1.6	No	4.8	Increased	No	CH	13	14
11	WES			DLBCL	Viszla	Pure	5	Young	M	28.8	Over	4	a	0.9	No	0.9	Normal	Yes	CH-IM	1492	1493
12	WES		WGS	DLBCL	Amstaff	Pure	7	Young	F	31.9	Over	5	a	0.9	No	1.6	Normal	No	CH-IM	237	1484
13	WES	RNA-Seq		DLBCL	Cocker	Pure	10	Old	F	12.1	Over	4	a	0.9	No	0.9	Increased	No	CH-IM	180	330
14	WES			DLBCL	Mixed	Mixed	11	Old	F	12.9	Over	4	a	0.2	No	0.1	Normal	No	CH-IM	355	547
15	WES			DLBCL	Dobermann	Pure	13	Old	M	42.6	Over	5	b	4.3	Yes	2.5	Normal	No	CH	99	167
16	WES	RNA-Seq		DLBCL	Boxer	Pure	6	Young	M	31.4	Over	5	a	8.3	Yes	8.5	Increased	No	CH-IM	227	544
17	WES	RNA-Seq		DLBCL	Poodle	Pure	14	Old	F	11.2	Over	4	b	0.2	No	0.2	Normal	No	CH	1	45
18	WES			DLBCL	German shepherd	Pure	10	Old	F	38.9	Over	4	a	0.9	No	0.9	Increased	No	CH-IM	299	299
19	WES			DLBCL	Mixed	Mixed	10	Old	F	35.4	Over	5	b	5	Yes	5.4	Increased	Yes	CH	1	3
20	WES	RNA-Seq		DLBCL	Yorkshire	Pure	15	Old	F	4.5	Under	4	a	0.9	No	0.9	Increased	No	CH-IM	273	302
21	WES		WGS	DLBCL	Dobermann	Pure	6	Young	F	34	Over	5	a	3.8	Yes	6.8	Increased	No	CH-IM	49	103
22	WES			DLBCL	Beagle	Pure	6	Young	M	27.2	Over	5	b	2.5	No	3.2	Normal	No	CH-IM	270	283
23	WES			DLBCL	Mixed	Mixed	8	Young	M	12.2	Over	4	a	0.9	No	0.9	Normal	Yes	CH-IM	283	374
24	WES	RNA-Seq	WGS	DLBCL	Poodle	Pure	5	Young	M	23	Over	4	a	1.3	No	3.4	Increased	No	CH-IM	493	585
25	WES	RNA-Seq		DLBCL	Rottweiler	Pure	5	Young	M	42.4	Over	5	a	4.7	Yes	1.5	Increased	No	CH	1	22
26	WES			DLBCL	Jack russell	Pure	10	Old	F	6.9	Under	4	a	0.9	No	0.9	Normal	Yes	CH-IM	87	202
27	WES	RNA-Seq		DLBCL	Border collie	Pure	7	Young	F	21	Over	4	a	1.3	No	3.7	Normal	No	CH-IM	228	356
28	WES			DLBCL	Rottweiler	Pure	4	Young	F	47.6	Over	5	b	46.3	Yes	73.8	Increased	Yes	CH-IM	260	263
29	WES			DLBCL	Border collie	Pure	11	Old	M	20	Over	4	a	0.2	No	0.1	Increased	Yes	CH-IM	796	797
30	WES	RNA-Seq		DLBCL	English setter	Pure	15	Old	M	22	Over	4	b	0.9	No	0.9	Normal	Yes	CH	113	176
31	WES			DLBCL	Mixed	Mixed	6	Young	F	18.8	Over	5	b	4.7	Yes	4.9	Increased	Yes	CH	398	568
32	WES			DLBCL	French bulldog	Pure	6	Young	M	11.6	Over	5	b	15.6	Yes	9.2	Increased	Yes	CH	26	84
33	WES	RNA-Seq		DLBCL	Jack russell	Pure	6	Young	M	6.1	Under	5	b	0.9	No	0.9	Normal	Yes	CH	1	23
34	WES			DLBCL	Mixed	Mixed	9	Young	F	25	Over	5	b	0.9	No	2.3	Normal	No	CH	39	69
35	WES			DLBCL	Belgian shepherd	Pure	4	Young	F	25.7	Over	5	a	1.9	No	2	Normal	No	CH-IM	344	345
36	WES	RNA-Seq		DLBCL	Amstaff	Pure	11	Old	M	40.9	Over	4	a	0.9	No	0.9	Normal	No	CH-IM	41	40
37	WES	RNA-Seq		DLBCL	Mixed	Mixed	12	Old	F	9.3	Under	5	a	0.9	No	1.4	Normal	No	CH	63	82
38	WES			DLBCL	English setter	Pure	5	Young	F	21	Over	5	b	1.1	No	2.8	Normal	No	CH	21	61
39	WES			DLBCL	Rottweiler	Pure	6	Young	F	40.3	Over	4	b	0.2	No	0.3	Normal	Yes	CH-IM	160	182
40	WES			DLBCL	Irish setter	Pure	11	Old	M	35.2	Over	5	a	0.8	No	1.2	Normal	No	CH-IM	789	790
41	WES	RNA-Seq		DLBCL	German shepherd	Pure	5	Young	F	32.1	Over	4	a	0.9	No	0.9	Normal	No	CH	1989	1991
42	WES			DLBCL	Bullmastiff	Pure	5	Young	M	59.4	Over	5	b	5.7	Yes	7.1	Normal	No	CH	38	165
43	WES			DLBCL	Mixed	Mixed	10	Old	M	20.7	Over	5	b	10.5	Yes	5.5	Increased	No	CH	263	305
44	WES	RNA-Seq		DLBCL	German shepherd	Pure	10	Old	M	50	Over	4	a	0.9	No	0.9	Normal	No	CH	24	28
45	WES			DLBCL	Mixed	Mixed	10	Old	M	24.3	Over	4	a	0.9	No	0.9	Normal	No	CH	42	100
46	WES			DLBCL	Mixed	Mixed	4	Young	M	27.1	Over	4	a	0.9	No	0.9	Normal	Yes	CH	144	179
47	WES	RNA-Seq		DLBCL	Bernese mountain	Pure	3	Young	M	36.1	Over	5	b	22	Yes	15	Increased	No	CH	20	35
48	WES			DLBCL	Mixed	Mixed	5	Young	M	11	Over	5	a	0.9	No	1.5	Normal	No	CH-IM	241	470
49	WES			DLBCL	Rottweiler	Pure	5	Young	F	60	Over	5	a	0.9	No	1.9	Normal	Yes	CH-IM	300	442
50	WES	RNA-Seq		DLBCL	Rottweiler	Pure	6	Young	F	42.3	Over	5	a	2.3	No	3.1	Normal	No	CH	24	160
51	WES	RNA-Seq		DLBCL	Golden retriever	Pure	8	Young	F	30.8	Over	5	b	1.2	No	3.9	Increased	Yes	CH	179	228
52	WES			DLBCL	Mixed	Mixed	7	Young	M	5	Under	4	a	0.9	No	0.9	Normal	Yes	CH-IM	649	845
53	WES	RNA-Seq	WGS	DLBCL	Golden retriever	Pure	7	Young	M	32.8	Over	5	b	8.3	Yes	0.9	Increased	Yes	CH-IM	60	63
54	WES			DLBCL	Bernese mountain	Pure	5	Young	F	42	Over	4	a	0.9	No	0.9	Normal	No	CH-IM	291	691
55	WES	RNA-Seq		DLBCL	Mixed	Mixed	10	Old	F	19.1	Over	4	a	0.9	No	0.9	Increased	Yes	CH-IM	36	50
56	WES	RNA-Seq		DLBCL	French bulldog	Pure	4	Young	F	10.6	Over	5	a	1.3	No	2.2	Increased	No	CH-IM	196	237
57	WES	RNA-Seq		DLBCL	Amstaff	Pure	7	Young	M	33.9	Over	4	b	0.9	No	0.9	Increased	No	CH-IM	37	267
58	WES	RNA-Seq		DLBCL	German shepherd	Pure	10	Old	F	38.8	Over	5	a	1.5	No	0.9	Increased	No	CH	26	90
59	WES	RNA-Seq		DLBCL	Bernese mountain	Pure	5	Young	F	44	Over	5	a	7.9	Yes	2	Increased	No	CH-IM	376	603
60	WES	RNA-Seq		DLBCL	German shepherd	Pure	4	Young	M	39.9	Over	5	a	2.3	No	11.4	Normal	Yes	CH-IM	203	665
61	WES	RNA-Seq		DLBCL	Mixed	Mixed	13	Old	F	16.4	Over	4	b	0.9	No	0.9	Increased	No	CH-IM	1	5
62	WES	RNA-Seq	WGS	DLBCL	Dobermann	Pure	9	Young	F	37.6	Over	4	a	0.9	No	0.9	Normal	No	CH-IM	60	94
63	WES	RNA-Seq		DLBCL	Bloodhound	Pure	4	Young	M	46.1	Over	5	b	5.5	Yes	14.4	Normal	No	CH	32	60
64	WES	RNA-Seq		DLBCL	Fox terrier	Pure	10	Old	M	10.4	Over	5	a	2.7	No	3.1	Normal	Yes	CH-IM	300	301
65	WES	RNA-Seq	WGS	DLBCL	Golden retriever	Pure	10	Old	M	33.1	Over	5	a	1.4	No	1.1	Normal	No	CH-IM	988	1153
66	WES	RNA-Seq		DLBCL	Basset hound	Pure	10	Old	F	24.9	Over	3	a	0.5	No	0.6	Increased	No	CH	78	87
67	WES	RNA-Seq		DLBCL	Mixed	Mixed	13	Old	M	6.8	Under	5	a	1.2	No	1	Normal	No	CH	455	989
68	WES	RNA-Seq		DLBCL	Golden retriever	Pure	6	Young	F	25	Over	5	a	2.5	No	0.5	Increased	No	CH-IM	95	278
69	WES	RNA-Seq	WGS	DLBCL	German shepherd	Pure	11	Old	F	36.7	Over	5	b	3.5	Yes	5.3	Increased	No	CH-IM	76	77
70	WES	RNA-Seq		DLBCL	Rottweiler	Pure	3	Young	M	45	Over	5	a	18.2	Yes	34.3	Normal	No	CH-IM	317	544
71	WES	RNA-Seq		DLBCL	Labrador retriver	Pure	5	Young	F	38	Over	5	a	1.6	No	8.2	Increased	Yes	CH-IM	325	645
72	WES	RNA-Seq		DLBCL	Great dane	Pure	3	Young	M	81.3	Over	5	b	45.6	Yes	51.9	Increased	No	CH	20	30
73	WES	RNA-Seq		DLBCL	Beagle	Pure	5	Young	F	19.5	Over	4	b	0.9	No	0.9	Increased	No	CH-IM	1192	1218
74	WES	RNA-Seq		DLBCL	Mixed	Mixed	12	Old	M	17.2	Over	5	b	2.5	No	0.9	Normal	No	CH	19	19
75	WES	RNA-Seq		DLBCL	Mixed	Mixed	9	Young	M	12.8	Over	4	a	0.9	No	0.9	Normal	Yes	CH	672	1099
76	WES	RNA-Seq		DLBCL	Corgi	Pure	6	Young	F	21.6	Over	5	a	1.8	No	0.9	Increased	No	CH-IM	1403	1403
77	WES	RNA-Seq		DLBCL	Weimaraner	Pure	5	Young	F	31.9	Over	5	a	7.6	Yes	0.9	Normal	Yes	CH	98	178
BM: bone marrow; TTP: time to progression; LSS: lymphoma specific survival
