# Supplementary material for: The genomic landscape of canine diffuse large B-cell lymphoma identifies distinct subtypes with clinical and therapeutic implications
Source: Research Square preprint supplement (doi:10.21203/rs.3.rs-916612/v1), 2021-09-21
Supplement: Supplementary file 16 [file 6ae807eef3cfb98f506a3439.xlsx]

## Sheet: Index
Supplementary Data 10: Gene-set enrichment analysis (GSEA) in cDLBCL based on MYC mutational status (mut vs wt).

## Sheet: pos
Positively enriched pathways in MYC mutated samples compared to wild-type.
NAME	GS<br> follow link to MSigDB	GS DETAILS	SIZE	ES	NES	NOM p-val	FDR q-val	FWER p-val	RANK AT MAX	LEADING EDGE
HALLMARK_EPITHELIAL_MESENCHYMAL_TRANSITION	HALLMARK_EPITHELIAL_MESENCHYMAL_TRANSITION	Details ...	171	0.773457	2.92026	0	0	0	1116	tags=57%, list=9%, signal=62%
GOCC_COLLAGEN_CONTAINING_EXTRACELLULAR_MATRIX	GOCC_COLLAGEN_CONTAINING_EXTRACELLULAR_MATRIX	Details ...	277	0.721421	2.8578	0	0	0	1189	tags=53%, list=10%, signal=58%
GOBP_EXTERNAL_ENCAPSULATING_STRUCTURE_ORGANIZATION	GOBP_EXTERNAL_ENCAPSULATING_STRUCTURE_ORGANIZATION	Details ...	292	0.704539	2.85664	0	0	0	1192	tags=49%, list=10%, signal=53%
GOCC_EXTERNAL_ENCAPSULATING_STRUCTURE	GOCC_EXTERNAL_ENCAPSULATING_STRUCTURE	Details ...	355	0.681809	2.77216	0	0	0	1368	tags=52%, list=12%, signal=57%
GOMF_EXTRACELLULAR_MATRIX_STRUCTURAL_CONSTITUENT	GOMF_EXTRACELLULAR_MATRIX_STRUCTURAL_CONSTITUENT	Details ...	112	0.770048	2.7426	0	0	0	1089	tags=71%, list=9%, signal=78%
GOBP_COLLAGEN_FIBRIL_ORGANIZATION	GOBP_COLLAGEN_FIBRIL_ORGANIZATION	Details ...	46	0.857261	2.68878	0	0	0	1047	tags=74%, list=9%, signal=81%
ESC_V6.5_UP_EARLY.V1_DN	ESC_V6.5_UP_EARLY.V1_DN	Details ...	118	0.694238	2.52476	0	0	0	1495	tags=48%, list=13%, signal=55%
KEGG_ECM_RECEPTOR_INTERACTION	KEGG_ECM_RECEPTOR_INTERACTION	Details ...	65	0.7431	2.45879	0	0	0	1106	tags=58%, list=9%, signal=64%
GOCC_COLLAGEN_TRIMER	GOCC_COLLAGEN_TRIMER	Details ...	54	0.764914	2.43553	0	0	0	1089	tags=63%, list=9%, signal=69%
GSE36891_POLYIC_TLR3_VS_PAM_TLR2_STIM_PERITONEAL_MACROPHAGE_UP	GSE36891_POLYIC_TLR3_VS_PAM_TLR2_STIM_PERITONEAL_MACROPHAGE_UP	Details ...	112	0.680089	2.43378	0	0	0	1225	tags=45%, list=10%, signal=49%
GOBP_BLOOD_VESSEL_MORPHOGENESIS	GOBP_BLOOD_VESSEL_MORPHOGENESIS	Details ...	465	0.574159	2.4008	0	0	0	1867	tags=41%, list=16%, signal=47%
GOCC_ENDOPLASMIC_RETICULUM_LUMEN	GOCC_ENDOPLASMIC_RETICULUM_LUMEN	Details ...	204	0.6197	2.39901	0	0	0	1854	tags=41%, list=16%, signal=47%
HALLMARK_TNFA_SIGNALING_VIA_NFKB	HALLMARK_TNFA_SIGNALING_VIA_NFKB	Details ...	171	0.636936	2.39194	0	0	0	1499	tags=40%, list=13%, signal=45%
GOBP_CARTILAGE_DEVELOPMENT	GOBP_CARTILAGE_DEVELOPMENT	Details ...	128	0.654544	2.38057	0	0	0	1596	tags=43%, list=14%, signal=49%
BMI1_DN.V1_UP	BMI1_DN.V1_UP	Details ...	119	0.654359	2.37212	0	0	0	1560	tags=46%, list=13%, signal=53%
GSE37605_TREG_VS_TCONV_NOD_FOXP3_FUSION_GFP_UP	GSE37605_TREG_VS_TCONV_NOD_FOXP3_FUSION_GFP_UP	Details ...	101	0.664521	2.35491	0	0	0	1895	tags=52%, list=16%, signal=62%
GSE36891_UNSTIM_VS_POLYIC_TLR3_STIM_PERITONEAL_MACROPHAGE_UP	GSE36891_UNSTIM_VS_POLYIC_TLR3_STIM_PERITONEAL_MACROPHAGE_UP	Details ...	101	0.649618	2.32891	0	0	0	1588	tags=53%, list=13%, signal=61%
MEL18_DN.V1_UP	MEL18_DN.V1_UP	Details ...	113	0.660904	2.32778	0	0	0	1393	tags=46%, list=12%, signal=52%
GOBP_NEGATIVE_REGULATION_OF_WOUND_HEALING	GOBP_NEGATIVE_REGULATION_OF_WOUND_HEALING	Details ...	43	0.760604	2.3213	0	0	0	964	tags=49%, list=8%, signal=53%
HALLMARK_COAGULATION	HALLMARK_COAGULATION	Details ...	92	0.683075	2.31804	0	0	0	1733	tags=42%, list=15%, signal=49%
HALLMARK_ANGIOGENESIS	HALLMARK_ANGIOGENESIS		29	0.819555	2.31351	0	0	0	1625	tags=76%, list=14%, signal=88%
GSE37605_FOXP3_FUSION_GFP_VS_IRES_GFP_TREG_C57BL6_UP	GSE37605_FOXP3_FUSION_GFP_VS_IRES_GFP_TREG_C57BL6_UP		157	0.613759	2.31287	0	0	0	1250	tags=39%, list=11%, signal=43%
GSE45365_NK_CELL_VS_CD11B_DC_DN	GSE45365_NK_CELL_VS_CD11B_DC_DN		173	0.608377	2.30619	0	0	0	1499	tags=35%, list=13%, signal=39%
GOBP_NEGATIVE_REGULATION_OF_COAGULATION	GOBP_NEGATIVE_REGULATION_OF_COAGULATION		32	0.801528	2.30411	0	0	0	955	tags=53%, list=8%, signal=58%
FLETCHER_PBMC_BCG_10W_INFANT_PPD_STIMULATED_VS_UNSTIMULATED_10W_UP	FLETCHER_PBMC_BCG_10W_INFANT_PPD_STIMULATED_VS_UNSTIMULATED_10W_UP		65	0.701002	2.29916	0	0	0	990	tags=38%, list=8%, signal=42%
GOBP_NEGATIVE_REGULATION_OF_RESPONSE_TO_WOUNDING	GOBP_NEGATIVE_REGULATION_OF_RESPONSE_TO_WOUNDING		56	0.716387	2.29144	0	0	0	964	tags=43%, list=8%, signal=46%
GOBP_REGULATION_OF_WOUND_HEALING	GOBP_REGULATION_OF_WOUND_HEALING		85	0.660527	2.28629	0	0	0	964	tags=42%, list=8%, signal=46%
GOMF_EXTRACELLULAR_MATRIX_STRUCTURAL_CONSTITUENT_CONFERRING_TENSILE_STRENGTH	GOMF_EXTRACELLULAR_MATRIX_STRUCTURAL_CONSTITUENT_CONFERRING_TENSILE_STRENGTH		29	0.783744	2.28465	0	0	0	1089	tags=83%, list=9%, signal=91%
GOBP_REGULATION_OF_RESPONSE_TO_WOUNDING	GOBP_REGULATION_OF_RESPONSE_TO_WOUNDING		110	0.635169	2.27998	0	0	0	964	tags=37%, list=8%, signal=40%
GOMF_EXTRACELLULAR_MATRIX_BINDING	GOMF_EXTRACELLULAR_MATRIX_BINDING		46	0.737277	2.27836	0	0	0	1094	tags=54%, list=9%, signal=60%
GOBP_CHONDROCYTE_DIFFERENTIATION	GOBP_CHONDROCYTE_DIFFERENTIATION		75	0.665755	2.2739	0	0	0	1596	tags=45%, list=14%, signal=52%
GOCC_COMPLEX_OF_COLLAGEN_TRIMERS	GOCC_COMPLEX_OF_COLLAGEN_TRIMERS		18	0.880908	2.25265	0	2.98539e-05	0.001	1089	tags=89%, list=9%, signal=98%
GOBP_ENDOTHELIAL_CELL_MIGRATION	GOBP_ENDOTHELIAL_CELL_MIGRATION		178	0.592163	2.24947	0	2.89493e-05	0.001	1885	tags=41%, list=16%, signal=48%
GOBP_REGULATION_OF_VASCULATURE_DEVELOPMENT	GOBP_REGULATION_OF_VASCULATURE_DEVELOPMENT		211	0.582477	2.24574	0	5.59563e-05	0.002	1885	tags=42%, list=16%, signal=49%
CAHOY_ASTROGLIAL	CAHOY_ASTROGLIAL		86	0.646037	2.24532	0	5.43576e-05	0.002	1227	tags=42%, list=10%, signal=46%
GOMF_GROWTH_FACTOR_BINDING	GOMF_GROWTH_FACTOR_BINDING		107	0.633267	2.24274	0	5.28477e-05	0.002	1643	tags=45%, list=14%, signal=52%
GOMF_HEPARIN_BINDING	GOMF_HEPARIN_BINDING		104	0.625342	2.24246	0	5.14193e-05	0.002	876	tags=44%, list=7%, signal=47%
GOBP_SPROUTING_ANGIOGENESIS	GOBP_SPROUTING_ANGIOGENESIS		101	0.634987	2.24033	0	5.00662e-05	0.002	1417	tags=43%, list=12%, signal=48%
GOMF_COLLAGEN_BINDING	GOMF_COLLAGEN_BINDING		58	0.698226	2.23793	0	4.87825e-05	0.002	1097	tags=48%, list=9%, signal=53%
GOCC_BASEMENT_MEMBRANE	GOCC_BASEMENT_MEMBRANE		71	0.675748	2.23688	0	4.75629e-05	0.002	1132	tags=51%, list=10%, signal=56%
GOBP_CONNECTIVE_TISSUE_DEVELOPMENT	GOBP_CONNECTIVE_TISSUE_DEVELOPMENT		167	0.595002	2.23477	0	4.64028e-05	0.002	1596	tags=41%, list=14%, signal=47%
GOBP_EPITHELIAL_TO_MESENCHYMAL_TRANSITION	GOBP_EPITHELIAL_TO_MESENCHYMAL_TRANSITION		108	0.628552	2.23099	0	4.5298e-05	0.002	1570	tags=42%, list=13%, signal=48%
GOBP_EXTRACELLULAR_MATRIX_ASSEMBLY	GOBP_EXTRACELLULAR_MATRIX_ASSEMBLY		37	0.750751	2.22635	0	4.42446e-05	0.002	1192	tags=57%, list=10%, signal=63%
GOBP_SKELETAL_SYSTEM_DEVELOPMENT	GOBP_SKELETAL_SYSTEM_DEVELOPMENT		331	0.549943	2.22131	0	6.46514e-05	0.003	1828	tags=36%, list=15%, signal=42%
BMI1_DN_MEL18_DN.V1_UP	BMI1_DN_MEL18_DN.V1_UP		116	0.608347	2.20794	0	0.000126616	0.006	1393	tags=42%, list=12%, signal=47%
GOBP_NEGATIVE_REGULATION_OF_VASCULATURE_DEVELOPMENT	GOBP_NEGATIVE_REGULATION_OF_VASCULATURE_DEVELOPMENT		69	0.664833	2.19875	0	0.000206529	0.01	1170	tags=36%, list=10%, signal=40%
GOBP_AMEBOIDAL_TYPE_CELL_MIGRATION	GOBP_AMEBOIDAL_TYPE_CELL_MIGRATION		321	0.543605	2.19677	0	0.000202134	0.01	1885	tags=38%, list=16%, signal=44%
GOMF_GLYCOSAMINOGLYCAN_BINDING	GOMF_GLYCOSAMINOGLYCAN_BINDING		143	0.592679	2.18429	0	0.000256918	0.013	1924	tags=54%, list=16%, signal=64%
GOBP_REGULATION_OF_EPITHELIAL_TO_MESENCHYMAL_TRANSITION	GOBP_REGULATION_OF_EPITHELIAL_TO_MESENCHYMAL_TRANSITION		70	0.646553	2.18381	0	0.000251675	0.013	1888	tags=49%, list=16%, signal=57%
GOBP_ROOF_OF_MOUTH_DEVELOPMENT	GOBP_ROOF_OF_MOUTH_DEVELOPMENT		63	0.657899	2.17056	0	0.000303575	0.016	1396	tags=41%, list=12%, signal=47%
GOBP_CELL_MIGRATION_INVOLVED_IN_SPROUTING_ANGIOGENESIS	GOBP_CELL_MIGRATION_INVOLVED_IN_SPROUTING_ANGIOGENESIS		46	0.708407	2.16988	0	0.000297622	0.016	1607	tags=50%, list=14%, signal=58%
GSE6259_CD4_TCELL_VS_CD8_TCELL_UP	GSE6259_CD4_TCELL_VS_CD8_TCELL_UP		155	0.582461	2.16194	0	0.000309976	0.017	1750	tags=37%, list=15%, signal=43%
GOBP_FORMATION_OF_PRIMARY_GERM_LAYER	GOBP_FORMATION_OF_PRIMARY_GERM_LAYER		79	0.636647	2.15937	0	0.000304127	0.017	1704	tags=46%, list=14%, signal=53%
GSE22196_HEALTHY_VS_OBESE_MOUSE_SKIN_GAMMADELTA_TCELL_DN	GSE22196_HEALTHY_VS_OBESE_MOUSE_SKIN_GAMMADELTA_TCELL_DN		163	0.570178	2.15593	0	0.000316008	0.018	1466	tags=31%, list=12%, signal=35%
GOBP_REGULATION_OF_CARTILAGE_DEVELOPMENT	GOBP_REGULATION_OF_CARTILAGE_DEVELOPMENT		47	0.69764	2.15505	0	0.000310262	0.018	1569	tags=55%, list=13%, signal=64%
PATEL_SKIN_OF_BODY_ZOSTAVAX_AGE_70_93YO_VZV_CHALLENGE_6HR_TOP_30_DEG_UP	PATEL_SKIN_OF_BODY_ZOSTAVAX_AGE_70_93YO_VZV_CHALLENGE_6HR_TOP_30_DEG_UP		20	0.815489	2.1529	0	0.000321622	0.019	814	tags=55%, list=7%, signal=59%
KEGG_DILATED_CARDIOMYOPATHY	KEGG_DILATED_CARDIOMYOPATHY		61	0.64629	2.15283	0	0.000315979	0.019	1158	tags=34%, list=10%, signal=38%
GOMF_GROWTH_FACTOR_ACTIVITY	GOMF_GROWTH_FACTOR_ACTIVITY		85	0.629306	2.15095	0	0.00032684	0.02	1436	tags=41%, list=12%, signal=47%
GOCC_PLATELET_ALPHA_GRANULE	GOCC_PLATELET_ALPHA_GRANULE		64	0.645551	2.14592	0	0.000321301	0.02	1158	tags=33%, list=10%, signal=36%
GSE43955_1H_VS_20H_ACT_CD4_TCELL_WITH_TGFB_IL6_DN	GSE43955_1H_VS_20H_ACT_CD4_TCELL_WITH_TGFB_IL6_DN		150	0.580645	2.14417	0	0.000331686	0.021	1631	tags=37%, list=14%, signal=42%
GOBP_ENDODERMAL_CELL_DIFFERENTIATION	GOBP_ENDODERMAL_CELL_DIFFERENTIATION		34	0.731363	2.13807	0	0.000372789	0.024	1704	tags=53%, list=14%, signal=62%
KEGG_ARRHYTHMOGENIC_RIGHT_VENTRICULAR_CARDIOMYOPATHY_ARVC	KEGG_ARRHYTHMOGENIC_RIGHT_VENTRICULAR_CARDIOMYOPATHY_ARVC		53	0.668666	2.13551	0	0.000412583	0.027	2392	tags=53%, list=20%, signal=66%
KEGG_HYPERTROPHIC_CARDIOMYOPATHY_HCM	KEGG_HYPERTROPHIC_CARDIOMYOPATHY_HCM		57	0.653371	2.13364	0	0.000421103	0.028	1158	tags=35%, list=10%, signal=39%
KEGG_FOCAL_ADHESION	KEGG_FOCAL_ADHESION		164	0.562169	2.13292	0	0.000414524	0.028	2466	tags=50%, list=21%, signal=62%
GOBP_MESENCHYMAL_CELL_DIFFERENTIATION	GOBP_MESENCHYMAL_CELL_DIFFERENTIATION		162	0.565387	2.13271	0	0.000408146	0.028	1888	tags=44%, list=16%, signal=51%
GOBP_REGULATION_OF_COAGULATION	GOBP_REGULATION_OF_COAGULATION		48	0.692958	2.13152	0	0.000430647	0.03	955	tags=46%, list=8%, signal=50%
LEF1_UP.V1_UP	LEF1_UP.V1_UP		120	0.582767	2.12953	0	0.000438509	0.031	1227	tags=37%, list=10%, signal=41%
HP_ABNORMALITY_OF_HAND_JOINT_MOBILITY	HP_ABNORMALITY_OF_HAND_JOINT_MOBILITY		25	0.776309	2.12684	0	0.000529923	0.038	588	tags=40%, list=5%, signal=42%
GOBP_AMINOGLYCAN_CATABOLIC_PROCESS	GOBP_AMINOGLYCAN_CATABOLIC_PROCESS		47	0.672005	2.12258	0	0.000549672	0.039	1762	tags=51%, list=15%, signal=60%
GOMF_CARGO_RECEPTOR_ACTIVITY	GOMF_CARGO_RECEPTOR_ACTIVITY		56	0.66304	2.12227	0	0.000541819	0.039	1525	tags=50%, list=13%, signal=57%
GOBP_COLLAGEN_METABOLIC_PROCESS	GOBP_COLLAGEN_METABOLIC_PROCESS		73	0.629314	2.1194	0	0.000561076	0.041	1791	tags=53%, list=15%, signal=63%
GOBP_POSITIVE_REGULATION_OF_CELL_JUNCTION_ASSEMBLY	GOBP_POSITIVE_REGULATION_OF_CELL_JUNCTION_ASSEMBLY		57	0.664569	2.11932	0	0.000566399	0.042	1575	tags=44%, list=13%, signal=50%
GOBP_TISSUE_MIGRATION	GOBP_TISSUE_MIGRATION		242	0.539463	2.11395	0	0.000623862	0.047	1885	tags=36%, list=16%, signal=42%
GOBP_REACTIVE_OXYGEN_SPECIES_BIOSYNTHETIC_PROCESS	GOBP_REACTIVE_OXYGEN_SPECIES_BIOSYNTHETIC_PROCESS		77	0.62731	2.11394	0	0.000615431	0.047	1821	tags=34%, list=15%, signal=40%
GOBP_POSITIVE_REGULATION_OF_VASCULATURE_DEVELOPMENT	GOBP_POSITIVE_REGULATION_OF_VASCULATURE_DEVELOPMENT		123	0.589695	2.11212	0	0.000645312	0.05	2295	tags=53%, list=19%, signal=65%
GOBP_REGULATION_OF_EXTRACELLULAR_MATRIX_ORGANIZATION	GOBP_REGULATION_OF_EXTRACELLULAR_MATRIX_ORGANIZATION		39	0.722312	2.1076	0	0.000699236	0.055	1047	tags=46%, list=9%, signal=50%
GOBP_GASTRULATION	GOBP_GASTRULATION		125	0.577865	2.10715	0	0.000690155	0.055	1615	tags=35%, list=14%, signal=40%
GOBP_CELL_SUBSTRATE_ADHESION	GOBP_CELL_SUBSTRATE_ADHESION		286	0.522176	2.10166	0	0.000790246	0.063	2195	tags=41%, list=19%, signal=49%
GOBP_REACTIVE_NITROGEN_SPECIES_METABOLIC_PROCESS	GOBP_REACTIVE_NITROGEN_SPECIES_METABOLIC_PROCESS		55	0.655855	2.10092	0	0.000780242	0.063	1821	tags=38%, list=15%, signal=45%
HP_SOFT_SKIN	HP_SOFT_SKIN		26	0.748933	2.09389	0	0.000888892	0.073	1040	tags=46%, list=9%, signal=50%
GOBP_CHONDROCYTE_DEVELOPMENT	GOBP_CHONDROCYTE_DEVELOPMENT		22	0.783403	2.09059	0	0.000971479	0.081	1221	tags=55%, list=10%, signal=61%
GSE9509_LPS_VS_LPS_AND_IL10_STIM_IL10_KO_MACROPHAGE_10MIN_UP	GSE9509_LPS_VS_LPS_AND_IL10_STIM_IL10_KO_MACROPHAGE_10MIN_UP		150	0.562822	2.08875	0	0.00104066	0.088	1241	tags=31%, list=11%, signal=34%
GOBP_REGULATION_OF_NON_CANONICAL_WNT_SIGNALING_PATHWAY	GOBP_REGULATION_OF_NON_CANONICAL_WNT_SIGNALING_PATHWAY		23	0.77192	2.08656	0	0.00106253	0.09	1506	tags=65%, list=13%, signal=75%
GOBP_MESENCHYME_DEVELOPMENT	GOBP_MESENCHYME_DEVELOPMENT		195	0.542245	2.0861	0	0.00104988	0.09	1888	tags=44%, list=16%, signal=52%
GOCC_PLATELET_ALPHA_GRANULE_LUMEN	GOCC_PLATELET_ALPHA_GRANULE_LUMEN		46	0.669292	2.08589	0	0.00104872	0.091	1158	tags=33%, list=10%, signal=36%
HP_CONGENITAL_HIP_DISLOCATION	HP_CONGENITAL_HIP_DISLOCATION		61	0.63196	2.08507	0	0.00108079	0.095	1956	tags=44%, list=17%, signal=53%
HALLMARK_HYPOXIA	HALLMARK_HYPOXIA		159	0.555087	2.08437	0	0.00107924	0.096	1359	tags=32%, list=12%, signal=36%
GOBP_POSITIVE_REGULATION_OF_EPITHELIAL_TO_MESENCHYMAL_TRANSITION	GOBP_POSITIVE_REGULATION_OF_EPITHELIAL_TO_MESENCHYMAL_TRANSITION		40	0.694698	2.07675	0	0.00131515	0.116	1799	tags=58%, list=15%, signal=68%
GOBP_MESENCHYMAL_CELL_PROLIFERATION	GOBP_MESENCHYMAL_CELL_PROLIFERATION		28	0.743768	2.07607	0	0.00132151	0.117	1687	tags=68%, list=14%, signal=79%
GOBP_RESPONSE_TO_RETINOIC_ACID	GOBP_RESPONSE_TO_RETINOIC_ACID		67	0.611681	2.07501	0	0.00133817	0.119	1221	tags=39%, list=10%, signal=43%
GOBP_EPITHELIAL_CELL_PROLIFERATION	GOBP_EPITHELIAL_CELL_PROLIFERATION		278	0.519718	2.07241	0	0.00133384	0.12	1867	tags=37%, list=16%, signal=43%
GOMF_STRUCTURAL_MOLECULE_ACTIVITY	GOMF_STRUCTURAL_MOLECULE_ACTIVITY		388	0.502342	2.06937	0	0.00140192	0.128	1138	tags=27%, list=10%, signal=28%
HALLMARK_MYOGENESIS	HALLMARK_MYOGENESIS		139	0.559234	2.06787	0	0.00149895	0.137	2248	tags=45%, list=19%, signal=54%
GOBP_BONE_GROWTH	GOBP_BONE_GROWTH		18	0.791355	2.06513	0	0.00160379	0.148	1371	tags=61%, list=12%, signal=69%
GOBP_NEGATIVE_REGULATION_OF_CARTILAGE_DEVELOPMENT	GOBP_NEGATIVE_REGULATION_OF_CARTILAGE_DEVELOPMENT		19	0.78998	2.06503	0	0.00159688	0.149	1569	tags=68%, list=13%, signal=79%
GOMF_CELL_ADHESION_MEDIATOR_ACTIVITY	GOMF_CELL_ADHESION_MEDIATOR_ACTIVITY		43	0.679179	2.06465	0	0.00159008	0.15	2194	tags=63%, list=19%, signal=77%
GOBP_AORTA_MORPHOGENESIS	GOBP_AORTA_MORPHOGENESIS		25	0.74126	2.06384	0	0.00160292	0.152	2154	tags=72%, list=18%, signal=88%
GOBP_BLOOD_VESSEL_ENDOTHELIAL_CELL_MIGRATION	GOBP_BLOOD_VESSEL_ENDOTHELIAL_CELL_MIGRATION		99	0.591659	2.063	0	0.00159637	0.153	1816	tags=43%, list=15%, signal=51%
GOBP_REGULATION_OF_NITRIC_OXIDE_METABOLIC_PROCESS	GOBP_REGULATION_OF_NITRIC_OXIDE_METABOLIC_PROCESS		43	0.666892	2.06239	0	0.00162823	0.158	1821	tags=40%, list=15%, signal=47%
GOBP_NEGATIVE_REGULATION_OF_LOCOMOTION	GOBP_NEGATIVE_REGULATION_OF_LOCOMOTION		234	0.523852	2.05711	0	0.00176354	0.173	1888	tags=37%, list=16%, signal=43%
GOBP_REGULATION_OF_ENDOTHELIAL_CELL_MIGRATION	GOBP_REGULATION_OF_ENDOTHELIAL_CELL_MIGRATION		140	0.566849	2.05078	0	0.00204658	0.201	1885	tags=39%, list=16%, signal=46%
GSE6269_HEALTHY_VS_STAPH_PNEUMO_INF_PBMC_DN	GSE6269_HEALTHY_VS_STAPH_PNEUMO_INF_PBMC_DN		141	0.54975	2.05055	0	0.00203588	0.201	1627	tags=32%, list=14%, signal=37%
GOBP_ENDODERM_FORMATION	GOBP_ENDODERM_FORMATION		40	0.668289	2.04346	0	0.00241163	0.234	1704	tags=48%, list=14%, signal=55%
GSE17721_LPS_VS_GARDIQUIMOD_1H_BMDC_UP	GSE17721_LPS_VS_GARDIQUIMOD_1H_BMDC_UP		137	0.555291	2.04336	0	0.00238844	0.234	1168	tags=29%, list=10%, signal=32%
GSE9239_CTRL_VS_TNF_INHIBITOR_TREATED_DC_UP	GSE9239_CTRL_VS_TNF_INHIBITOR_TREATED_DC_UP		144	0.55573	2.04303	0	0.00238367	0.235	1969	tags=31%, list=17%, signal=36%
ATF2_S_UP.V1_DN	ATF2_S_UP.V1_DN		138	0.555268	2.03987	0	0.002576	0.254	1512	tags=38%, list=13%, signal=43%
GOBP_MUCOPOLYSACCHARIDE_METABOLIC_PROCESS	GOBP_MUCOPOLYSACCHARIDE_METABOLIC_PROCESS		88	0.589096	2.03682	0	0.00273787	0.27	2035	tags=36%, list=17%, signal=44%
FLETCHER_PBMC_BCG_10W_INFANT_BCG_STIMULATED_VS_UNSTIMULATED_10W_UP	FLETCHER_PBMC_BCG_10W_INFANT_BCG_STIMULATED_VS_UNSTIMULATED_10W_UP		91	0.581816	2.0367	0	0.00271252	0.27	1116	tags=27%, list=9%, signal=30%
GOBP_RESPONSE_TO_BMP	GOBP_RESPONSE_TO_BMP		101	0.583101	2.03544	0	0.0027486	0.273	1379	tags=35%, list=12%, signal=39%
GOBP_REGULATION_OF_EPITHELIAL_CELL_APOPTOTIC_PROCESS	GOBP_REGULATION_OF_EPITHELIAL_CELL_APOPTOTIC_PROCESS		62	0.62575	2.03506	0	0.00274943	0.276	1765	tags=44%, list=15%, signal=51%
GOBP_NEGATIVE_REGULATION_OF_CANONICAL_WNT_SIGNALING_PATHWAY	GOBP_NEGATIVE_REGULATION_OF_CANONICAL_WNT_SIGNALING_PATHWAY		135	0.550924	2.03374	0	0.00281015	0.283	1569	tags=30%, list=13%, signal=34%
GSE21379_WT_VS_SAP_KO_TFH_CD4_TCELL_UP	GSE21379_WT_VS_SAP_KO_TFH_CD4_TCELL_UP		149	0.549592	2.03307	0	0.00281889	0.286	2115	tags=48%, list=18%, signal=57%
GOBP_REGULATION_OF_CELL_JUNCTION_ASSEMBLY	GOBP_REGULATION_OF_CELL_JUNCTION_ASSEMBLY		137	0.557873	2.03028	0	0.00302885	0.306	1826	tags=38%, list=15%, signal=44%
GOBP_TISSUE_REMODELING	GOBP_TISSUE_REMODELING		124	0.556083	2.02902	0	0.00311013	0.314	2043	tags=39%, list=17%, signal=46%
GOBP_REGULATION_OF_COMPLEMENT_ACTIVATION	GOBP_REGULATION_OF_COMPLEMENT_ACTIVATION		35	0.689307	2.02888	0	0.0030913	0.315	1733	tags=37%, list=15%, signal=43%
GSE37605_C57BL6_VS_NOD_FOXP3_FUSION_GFP_TREG_DN	GSE37605_C57BL6_VS_NOD_FOXP3_FUSION_GFP_TREG_DN		164	0.544066	2.02856	0	0.00308916	0.318	1225	tags=28%, list=10%, signal=31%
GOBP_REGULATION_OF_CELL_MIGRATION_INVOLVED_IN_SPROUTING_ANGIOGENESIS	GOBP_REGULATION_OF_CELL_MIGRATION_INVOLVED_IN_SPROUTING_ANGIOGENESIS		33	0.701783	2.02673	0	0.00319252	0.327	1607	tags=52%, list=14%, signal=59%
GOMF_CELL_CELL_ADHESION_MEDIATOR_ACTIVITY	GOMF_CELL_CELL_ADHESION_MEDIATOR_ACTIVITY		35	0.687753	2.02591	0	0.00322175	0.332	2188	tags=63%, list=19%, signal=77%
HP_ABNORMALITY_OF_THE_WRIST	HP_ABNORMALITY_OF_THE_WRIST		93	0.579582	2.02459	0	0.00323441	0.337	1704	tags=37%, list=14%, signal=42%
GOBP_POSITIVE_REGULATION_OF_LOCOMOTION	GOBP_POSITIVE_REGULATION_OF_LOCOMOTION		425	0.491834	2.02266	0	0.00330987	0.345	1944	tags=34%, list=16%, signal=39%
HALLMARK_KRAS_SIGNALING_UP	HALLMARK_KRAS_SIGNALING_UP		160	0.54376	2.02239	0	0.00329041	0.345	1138	tags=29%, list=10%, signal=31%
KRAS.600.LUNG.BREAST_UP.V1_UP	KRAS.600.LUNG.BREAST_UP.V1_UP		138	0.553357	2.02216	0	0.0033103	0.349	1512	tags=42%, list=13%, signal=48%
EGFR_UP.V1_UP	EGFR_UP.V1_UP		161	0.53272	2.02165	0	0.00332181	0.353	2054	tags=37%, list=17%, signal=44%
GOBP_REGULATION_OF_EPIDERMAL_GROWTH_FACTOR_ACTIVATED_RECEPTOR_ACTIVITY	GOBP_REGULATION_OF_EPIDERMAL_GROWTH_FACTOR_ACTIVATED_RECEPTOR_ACTIVITY		20	0.756112	2.01771	0	0.00349347	0.369	542	tags=35%, list=5%, signal=37%
GOMF_RECEPTOR_REGULATOR_ACTIVITY	GOMF_RECEPTOR_REGULATOR_ACTIVITY		215	0.520214	2.01694	0	0.0034882	0.37	1816	tags=40%, list=15%, signal=46%
GOBP_POSITIVE_REGULATION_OF_SYNAPSE_ASSEMBLY	GOBP_POSITIVE_REGULATION_OF_SYNAPSE_ASSEMBLY		29	0.721156	2.01358	0	0.00369353	0.391	1575	tags=52%, list=13%, signal=60%
GOBP_REGULATION_OF_EPITHELIAL_CELL_MIGRATION	GOBP_REGULATION_OF_EPITHELIAL_CELL_MIGRATION		187	0.525457	2.01279	0	0.0037019	0.391	1885	tags=35%, list=16%, signal=41%
KEGG_TGF_BETA_SIGNALING_PATHWAY	KEGG_TGF_BETA_SIGNALING_PATHWAY		63	0.623756	2.01256	0	0.00368039	0.392	1329	tags=29%, list=11%, signal=32%
GOMF_SULFUR_COMPOUND_BINDING	GOMF_SULFUR_COMPOUND_BINDING		173	0.536732	2.0124	0	0.00365186	0.392	951	tags=31%, list=8%, signal=33%
GOBP_ENDOTHELIAL_CELL_PROLIFERATION	GOBP_ENDOTHELIAL_CELL_PROLIFERATION		118	0.563374	2.01072	0	0.00373282	0.403	1452	tags=36%, list=12%, signal=41%
GOBP_HEART_MORPHOGENESIS	GOBP_HEART_MORPHOGENESIS		162	0.535795	2.00865	0	0.00379824	0.41	1828	tags=43%, list=15%, signal=50%
GARCIA_PINERES_PBMC_HPV_16_L1_VLP_AGE_18_25YO_STIMULATED_VS_UNSTIMULATED_0DY_VACCINATION_INDEPENDENT_UP	GARCIA_PINERES_PBMC_HPV_16_L1_VLP_AGE_18_25YO_STIMULATED_VS_UNSTIMULATED_0DY_VACCINATION_INDEPENDENT_UP		185	0.526413	2.00108	0	0.00427239	0.445	1832	tags=31%, list=16%, signal=36%
GOBP_ENDOTHELIAL_CELL_CHEMOTAXIS	GOBP_ENDOTHELIAL_CELL_CHEMOTAXIS		22	0.738136	2.00064	0.00174825	0.00426165	0.446	973	tags=50%, list=8%, signal=54%
GOBP_COLLAGEN_BIOSYNTHETIC_PROCESS	GOBP_COLLAGEN_BIOSYNTHETIC_PROCESS		35	0.677707	1.99997	0	0.0042723	0.449	1170	tags=43%, list=10%, signal=47%
GOBP_CENTRAL_NERVOUS_SYSTEM_NEURON_DIFFERENTIATION	GOBP_CENTRAL_NERVOUS_SYSTEM_NEURON_DIFFERENTIATION		103	0.563279	1.99871	0	0.00437361	0.461	1814	tags=36%, list=15%, signal=42%
FLETCHER_PBMC_BCG_10W_INFANT_BCG_STIMULATED_VS_UNSTIMULATED_10W_DN	FLETCHER_PBMC_BCG_10W_INFANT_BCG_STIMULATED_VS_UNSTIMULATED_10W_DN		218	0.51459	1.99862	0	0.00435543	0.461	2634	tags=45%, list=22%, signal=57%
GSE43955_10H_VS_60H_ACT_CD4_TCELL_WITH_TGFB_IL6_DN	GSE43955_10H_VS_60H_ACT_CD4_TCELL_WITH_TGFB_IL6_DN		154	0.53022	1.9984	0	0.0043305	0.461	1736	tags=32%, list=15%, signal=38%
E2F1_UP.V1_DN	E2F1_UP.V1_DN		151	0.53205	1.99684	0	0.00440912	0.468	1738	tags=34%, list=15%, signal=39%
GOCC_GOLGI_LUMEN	GOCC_GOLGI_LUMEN		43	0.63502	1.99642	0	0.00440466	0.47	1615	tags=53%, list=14%, signal=62%
GOBP_REGULATION_OF_REACTIVE_OXYGEN_SPECIES_BIOSYNTHETIC_PROCESS	GOBP_REGULATION_OF_REACTIVE_OXYGEN_SPECIES_BIOSYNTHETIC_PROCESS		62	0.605182	1.99415	0	0.00454253	0.482	1821	tags=34%, list=15%, signal=40%
GOBP_RESPONSE_TO_WOUNDING	GOBP_RESPONSE_TO_WOUNDING		459	0.483361	1.99381	0	0.00452365	0.484	1841	tags=32%, list=16%, signal=36%
HP_ABNORMAL_CEREBRAL_ARTERY_MORPHOLOGY	HP_ABNORMAL_CEREBRAL_ARTERY_MORPHOLOGY		50	0.638241	1.99379	0	0.00449179	0.484	1811	tags=40%, list=15%, signal=47%
GOBP_NEGATIVE_REGULATION_OF_NOTCH_SIGNALING_PATHWAY	GOBP_NEGATIVE_REGULATION_OF_NOTCH_SIGNALING_PATHWAY		33	0.690582	1.99318	0	0.00451986	0.49	2154	tags=55%, list=18%, signal=67%
GOMF_WNT_PROTEIN_BINDING	GOMF_WNT_PROTEIN_BINDING		27	0.713738	1.99287	0	0.0045281	0.492	1569	tags=48%, list=13%, signal=55%
GOBP_CRANIAL_NERVE_MORPHOGENESIS	GOBP_CRANIAL_NERVE_MORPHOGENESIS		18	0.788234	1.99172	0	0.00458854	0.498	2105	tags=83%, list=18%, signal=101%
GSE24142_DN2_VS_DN3_THYMOCYTE_ADULT_UP	GSE24142_DN2_VS_DN3_THYMOCYTE_ADULT_UP		141	0.54054	1.99084	0	0.0046092	0.502	1904	tags=35%, list=16%, signal=42%
GSE40274_FOXP3_VS_FOXP3_AND_XBP1_TRANSDUCED_ACTIVATED_CD4_TCELL_UP	GSE40274_FOXP3_VS_FOXP3_AND_XBP1_TRANSDUCED_ACTIVATED_CD4_TCELL_UP		88	0.575716	1.98984	0	0.00462314	0.505	1781	tags=39%, list=15%, signal=45%
ESC_J1_UP_LATE.V1_UP	ESC_J1_UP_LATE.V1_UP		125	0.552852	1.98971	0	0.00459829	0.505	2256	tags=46%, list=19%, signal=57%
HP_DILATATION_OF_THE_CEREBRAL_ARTERY	HP_DILATATION_OF_THE_CEREBRAL_ARTERY		34	0.683364	1.98798	0	0.00472026	0.516	1791	tags=44%, list=15%, signal=52%
GOBP_CELL_ADHESION_MEDIATED_BY_INTEGRIN	GOBP_CELL_ADHESION_MEDIATED_BY_INTEGRIN		62	0.606731	1.98741	0.0015361	0.00472688	0.518	1499	tags=39%, list=13%, signal=44%
GOBP_REGULATION_OF_CHONDROCYTE_DIFFERENTIATION	GOBP_REGULATION_OF_CHONDROCYTE_DIFFERENTIATION		35	0.67656	1.986	0	0.00481483	0.528	1535	tags=51%, list=13%, signal=59%
GOBP_REGULATION_OF_SYNAPSE_ASSEMBLY	GOBP_REGULATION_OF_SYNAPSE_ASSEMBLY		52	0.622862	1.98447	0	0.00495168	0.539	1768	tags=44%, list=15%, signal=52%
HP_HIATUS_HERNIA	HP_HIATUS_HERNIA		24	0.71735	1.98337	0	0.0050248	0.548	1005	tags=33%, list=9%, signal=36%
GOBP_NEGATIVE_REGULATION_OF_WNT_SIGNALING_PATHWAY	GOBP_NEGATIVE_REGULATION_OF_WNT_SIGNALING_PATHWAY		156	0.527667	1.97932	0	0.00534297	0.566	1569	tags=30%, list=13%, signal=34%
GSE43955_1H_VS_10H_ACT_CD4_TCELL_WITH_TGFB_IL6_DN	GSE43955_1H_VS_10H_ACT_CD4_TCELL_WITH_TGFB_IL6_DN		148	0.535583	1.97898	0	0.0053451	0.567	1136	tags=24%, list=10%, signal=26%
GOMF_SERINE_TYPE_ENDOPEPTIDASE_INHIBITOR_ACTIVITY	GOMF_SERINE_TYPE_ENDOPEPTIDASE_INHIBITOR_ACTIVITY		43	0.641836	1.97857	0	0.00532293	0.568	2357	tags=63%, list=20%, signal=78%
GOBP_NEGATIVE_REGULATION_OF_CARDIAC_MUSCLE_TISSUE_GROWTH	GOBP_NEGATIVE_REGULATION_OF_CARDIAC_MUSCLE_TISSUE_GROWTH		17	0.788226	1.97804	0	0.00533127	0.57	685	tags=35%, list=6%, signal=37%
ATF2_UP.V1_DN	ATF2_UP.V1_DN		144	0.534256	1.97745	0	0.0053216	0.571	1231	tags=26%, list=10%, signal=29%
GSE22935_WT_VS_MYD88_KO_MACROPHAGE_12H_MBOVIS_BCG_STIM_UP	GSE22935_WT_VS_MYD88_KO_MACROPHAGE_12H_MBOVIS_BCG_STIM_UP		158	0.524706	1.97745	0	0.00528813	0.571	1113	tags=23%, list=9%, signal=25%
HOEK_NK_CELL_2011_2012_TIV_3D_VS_0DY_ADULT_3D_DN	HOEK_NK_CELL_2011_2012_TIV_3D_VS_0DY_ADULT_3D_DN		167	0.522451	1.97671	0	0.00529064	0.576	1614	tags=40%, list=14%, signal=46%
GOMF_TRANSFORMING_GROWTH_FACTOR_BETA_BINDING	GOMF_TRANSFORMING_GROWTH_FACTOR_BETA_BINDING		20	0.747206	1.97397	0	0.00552856	0.595	1778	tags=60%, list=15%, signal=71%
GOMF_SCAVENGER_RECEPTOR_ACTIVITY	GOMF_SCAVENGER_RECEPTOR_ACTIVITY		36	0.669646	1.97331	0	0.00557055	0.602	1525	tags=58%, list=13%, signal=67%
GOBP_EPITHELIAL_CELL_APOPTOTIC_PROCESS	GOBP_EPITHELIAL_CELL_APOPTOTIC_PROCESS		80	0.579914	1.97119	0	0.0057515	0.615	1883	tags=40%, list=16%, signal=47%
GOMF_INSULIN_LIKE_GROWTH_FACTOR_BINDING	GOMF_INSULIN_LIKE_GROWTH_FACTOR_BINDING		25	0.715329	1.96876	0	0.00598226	0.631	876	tags=44%, list=7%, signal=47%
GSE41176_UNSTIM_VS_ANTI_IGM_STIM_BCELL_3H_UP	GSE41176_UNSTIM_VS_ANTI_IGM_STIM_BCELL_3H_UP		149	0.529726	1.96839	0	0.00596891	0.634	1092	tags=20%, list=9%, signal=22%
TGFB_UP.V1_UP	TGFB_UP.V1_UP		144	0.530733	1.96836	0	0.00593295	0.634	1287	tags=34%, list=11%, signal=38%
GOBP_ENDOTHELIUM_DEVELOPMENT	GOBP_ENDOTHELIUM_DEVELOPMENT		99	0.550589	1.96696	0	0.00598267	0.639	2499	tags=53%, list=21%, signal=66%
GOBP_PLACENTA_DEVELOPMENT	GOBP_PLACENTA_DEVELOPMENT		89	0.563156	1.96671	0	0.00596405	0.641	2010	tags=39%, list=17%, signal=47%
AKT_UP.V1_DN	AKT_UP.V1_DN		139	0.533703	1.96665	0	0.00593432	0.642	2414	tags=42%, list=20%, signal=53%
GOBP_NEGATIVE_REGULATION_OF_CELLULAR_RESPONSE_TO_GROWTH_FACTOR_STIMULUS	GOBP_NEGATIVE_REGULATION_OF_CELLULAR_RESPONSE_TO_GROWTH_FACTOR_STIMULUS		68	0.600932	1.96568	0	0.00603297	0.652	1170	tags=35%, list=10%, signal=39%
GOBP_CARTILAGE_DEVELOPMENT_INVOLVED_IN_ENDOCHONDRAL_BONE_MORPHOGENESIS	GOBP_CARTILAGE_DEVELOPMENT_INVOLVED_IN_ENDOCHONDRAL_BONE_MORPHOGENESIS		17	0.774452	1.96323	0.00177305	0.00624189	0.671	1221	tags=47%, list=10%, signal=52%
GOBP_AMINOGLYCAN_BIOSYNTHETIC_PROCESS	GOBP_AMINOGLYCAN_BIOSYNTHETIC_PROCESS		79	0.575439	1.96269	0	0.00628271	0.672	1358	tags=32%, list=11%, signal=36%
GOBP_FAT_CELL_DIFFERENTIATION	GOBP_FAT_CELL_DIFFERENTIATION		161	0.523814	1.95762	0	0.00683821	0.708	2177	tags=38%, list=18%, signal=46%
GOCC_SARCOPLASM	GOCC_SARCOPLASM		52	0.618169	1.95623	0	0.00697878	0.719	886	tags=23%, list=8%, signal=25%
GOBP_DEVELOPMENT_OF_PRIMARY_FEMALE_SEXUAL_CHARACTERISTICS	GOBP_DEVELOPMENT_OF_PRIMARY_FEMALE_SEXUAL_CHARACTERISTICS		61	0.599611	1.95552	0	0.00701471	0.721	1615	tags=34%, list=14%, signal=40%
GOBP_OSSIFICATION	GOBP_OSSIFICATION		298	0.486436	1.95529	0	0.00699645	0.722	1816	tags=35%, list=15%, signal=40%
GOBP_REGULATION_OF_HORMONE_SECRETION	GOBP_REGULATION_OF_HORMONE_SECRETION		152	0.519685	1.95472	0	0.00704239	0.726	1060	tags=22%, list=9%, signal=24%
GOBP_TISSUE_MORPHOGENESIS	GOBP_TISSUE_MORPHOGENESIS		444	0.46999	1.95417	0	0.00705062	0.729	1828	tags=34%, list=15%, signal=39%
GSE10147_IL3_AND_HIVP17_VS_IL3_AND_CPG_STIM_PDC_UP	GSE10147_IL3_AND_HIVP17_VS_IL3_AND_CPG_STIM_PDC_UP		88	0.564831	1.9541	0	0.0070218	0.73	1403	tags=34%, list=12%, signal=38%
GOMF_TRANSMEMBRANE_RECEPTOR_PROTEIN_KINASE_ACTIVITY	GOMF_TRANSMEMBRANE_RECEPTOR_PROTEIN_KINASE_ACTIVITY		61	0.600872	1.95259	0	0.00715158	0.737	2672	tags=66%, list=23%, signal=84%
GOBP_ODONTOGENESIS	GOBP_ODONTOGENESIS		83	0.564555	1.95218	0	0.00717503	0.742	1077	tags=36%, list=9%, signal=39%
KRAS.LUNG.BREAST_UP.V1_UP	KRAS.LUNG.BREAST_UP.V1_UP		78	0.580722	1.95211	0	0.0071356	0.742	1313	tags=38%, list=11%, signal=43%
HP_AVASCULAR_NECROSIS_OF_THE_CAPITAL_FEMORAL_EPIPHYSIS	HP_AVASCULAR_NECROSIS_OF_THE_CAPITAL_FEMORAL_EPIPHYSIS		18	0.749189	1.95041	0.00175439	0.00730353	0.758	1005	tags=39%, list=9%, signal=42%
GOBP_AXIS_ELONGATION	GOBP_AXIS_ELONGATION		21	0.752073	1.95022	0	0.00727928	0.758	1651	tags=52%, list=14%, signal=61%
GOBP_NEGATIVE_REGULATION_OF_CHONDROCYTE_DIFFERENTIATION	GOBP_NEGATIVE_REGULATION_OF_CHONDROCYTE_DIFFERENTIATION		16	0.773015	1.94929	0.00171233	0.00732186	0.765	1535	tags=63%, list=13%, signal=72%
HP_LUMBAR_HYPERLORDOSIS	HP_LUMBAR_HYPERLORDOSIS		55	0.610563	1.94798	0	0.00744073	0.772	861	tags=22%, list=7%, signal=23%
HP_HYPEREXTENSIBLE_SKIN	HP_HYPEREXTENSIBLE_SKIN		58	0.600827	1.9473	0	0.007487	0.777	1884	tags=40%, list=16%, signal=47%
GOBP_TAXIS	GOBP_TAXIS		449	0.468602	1.94722	0	0.00744718	0.777	1828	tags=34%, list=15%, signal=39%
GOBP_RESPONSE_TO_KETONE	GOBP_RESPONSE_TO_KETONE		132	0.528956	1.94662	0	0.00749283	0.781	1933	tags=36%, list=16%, signal=42%
GOBP_FOREBRAIN_GENERATION_OF_NEURONS	GOBP_FOREBRAIN_GENERATION_OF_NEURONS		31	0.67374	1.94625	0	0.00752823	0.783	1814	tags=52%, list=15%, signal=61%
KEGG_COMPLEMENT_AND_COAGULATION_CASCADES	KEGG_COMPLEMENT_AND_COAGULATION_CASCADES		35	0.66472	1.94613	0	0.0075184	0.785	2053	tags=57%, list=17%, signal=69%
GOBP_REGULATION_OF_CELL_SUBSTRATE_ADHESION	GOBP_REGULATION_OF_CELL_SUBSTRATE_ADHESION		172	0.511627	1.94479	0	0.00762227	0.79	1944	tags=37%, list=16%, signal=44%
GOBP_POSITIVE_REGULATION_OF_ENDOTHELIAL_CELL_MIGRATION	GOBP_POSITIVE_REGULATION_OF_ENDOTHELIAL_CELL_MIGRATION		90	0.563492	1.94458	0	0.00760732	0.792	1885	tags=37%, list=16%, signal=43%
HARALAMBIEVA_PBMC_M_M_R_II_AGE_13_16YO_STIMULATED_VS_UNSTIMULATED_3_TO_7YR_POST_TOP_DEG_UP	HARALAMBIEVA_PBMC_M_M_R_II_AGE_13_16YO_STIMULATED_VS_UNSTIMULATED_3_TO_7YR_POST_TOP_DEG_UP		30	0.679833	1.94311	0	0.00772422	0.802	1737	tags=60%, list=15%, signal=70%
GOBP_REGULATION_OF_BONE_REMODELING	GOBP_REGULATION_OF_BONE_REMODELING		38	0.652098	1.94288	0	0.00770887	0.803	1013	tags=29%, list=9%, signal=32%
GOBP_REGULATION_OF_FAT_CELL_DIFFERENTIATION	GOBP_REGULATION_OF_FAT_CELL_DIFFERENTIATION		94	0.554551	1.942	0	0.00780018	0.809	2100	tags=40%, list=18%, signal=49%
HP_ASCENDING_AORTIC_DISSECTION	HP_ASCENDING_AORTIC_DISSECTION		18	0.763883	1.94128	0.00340136	0.00784245	0.812	1040	tags=44%, list=9%, signal=49%
GSE11961_MARGINAL_ZONE_BCELL_VS_MEMORY_BCELL_DAY7_DN	GSE11961_MARGINAL_ZONE_BCELL_VS_MEMORY_BCELL_DAY7_DN		105	0.549022	1.94004	0	0.00795585	0.82	1866	tags=48%, list=16%, signal=56%
GOBP_REGULATION_OF_ACUTE_INFLAMMATORY_RESPONSE	GOBP_REGULATION_OF_ACUTE_INFLAMMATORY_RESPONSE		28	0.679657	1.93996	0	0.00793014	0.82	1786	tags=46%, list=15%, signal=55%
GOBP_POSITIVE_REGULATION_OF_RESPONSE_TO_WOUNDING	GOBP_POSITIVE_REGULATION_OF_RESPONSE_TO_WOUNDING		48	0.615106	1.93856	0	0.00809441	0.83	866	tags=38%, list=7%, signal=40%
CORDENONSI_YAP_CONSERVED_SIGNATURE	CORDENONSI_YAP_CONSERVED_SIGNATURE		50	0.622144	1.93841	0	0.00809178	0.833	1630	tags=52%, list=14%, signal=60%
GSE22601_IMMATURE_CD4_SINGLE_POSITIVE_VS_DOUBLE_POSITIVE_THYMOCYTE_UP	GSE22601_IMMATURE_CD4_SINGLE_POSITIVE_VS_DOUBLE_POSITIVE_THYMOCYTE_UP		98	0.55101	1.93717	0.00146199	0.00817833	0.843	1846	tags=39%, list=16%, signal=46%
GOBP_AMINOGLYCAN_METABOLIC_PROCESS	GOBP_AMINOGLYCAN_METABOLIC_PROCESS		119	0.536711	1.93696	0	0.00818944	0.846	2035	tags=38%, list=17%, signal=45%
HALLMARK_INFLAMMATORY_RESPONSE	HALLMARK_INFLAMMATORY_RESPONSE		166	0.512531	1.93632	0	0.00821894	0.849	1615	tags=31%, list=14%, signal=36%
GOBP_REGULATION_OF_COLLAGEN_METABOLIC_PROCESS	GOBP_REGULATION_OF_COLLAGEN_METABOLIC_PROCESS		31	0.677912	1.93522	0	0.00829912	0.851	2194	tags=52%, list=19%, signal=63%
GOBP_CELLULAR_RESPONSE_TO_CADMIUM_ION	GOBP_CELLULAR_RESPONSE_TO_CADMIUM_ION		20	0.733534	1.93486	0.00167785	0.00830944	0.852	204	tags=25%, list=2%, signal=25%
GOBP_WOUND_HEALING	GOBP_WOUND_HEALING		376	0.469636	1.93263	0	0.00859896	0.863	1331	tags=26%, list=11%, signal=29%
GOBP_POSITIVE_REGULATION_OF_ACUTE_INFLAMMATORY_RESPONSE	GOBP_POSITIVE_REGULATION_OF_ACUTE_INFLAMMATORY_RESPONSE		16	0.781031	1.93151	0.00175131	0.00870343	0.867	879	tags=44%, list=7%, signal=47%
GOBP_BONE_REMODELING	GOBP_BONE_REMODELING		65	0.591572	1.93063	0	0.00879804	0.875	1013	tags=26%, list=9%, signal=28%
HP_ATROPHIC_SCARS	HP_ATROPHIC_SCARS		27	0.68907	1.93034	0	0.0087924	0.875	2053	tags=52%, list=17%, signal=63%
GOBP_SKELETAL_SYSTEM_MORPHOGENESIS	GOBP_SKELETAL_SYSTEM_MORPHOGENESIS		145	0.525313	1.92945	0	0.00885374	0.879	1828	tags=35%, list=15%, signal=41%
GOBP_POSITIVE_REGULATION_OF_ENDOTHELIAL_CELL_PROLIFERATION	GOBP_POSITIVE_REGULATION_OF_ENDOTHELIAL_CELL_PROLIFERATION		73	0.578321	1.92873	0	0.00886107	0.88	1452	tags=38%, list=12%, signal=43%
GOBP_NEURON_PROJECTION_GUIDANCE	GOBP_NEURON_PROJECTION_GUIDANCE		189	0.501494	1.92858	0	0.00882846	0.88	2010	tags=38%, list=17%, signal=45%
GSE1460_INTRATHYMIC_T_PROGENITOR_VS_THYMIC_STROMAL_CELL_DN	GSE1460_INTRATHYMIC_T_PROGENITOR_VS_THYMIC_STROMAL_CELL_DN		158	0.515139	1.92837	0	0.00881801	0.881	1441	tags=30%, list=12%, signal=33%
GOMF_FIBRONECTIN_BINDING	GOMF_FIBRONECTIN_BINDING		20	0.750167	1.92777	0.00176056	0.0088829	0.883	1265	tags=50%, list=11%, signal=56%
GOBP_CARDIAC_EPITHELIAL_TO_MESENCHYMAL_TRANSITION	GOBP_CARDIAC_EPITHELIAL_TO_MESENCHYMAL_TRANSITION		24	0.707498	1.92773	0.00340136	0.00884177	0.883	1416	tags=63%, list=12%, signal=71%
GSE24671_CTRL_VS_BAKIMULC_INFECTED_MOUSE_SPLENOCYTES_DN	GSE24671_CTRL_VS_BAKIMULC_INFECTED_MOUSE_SPLENOCYTES_DN		129	0.525378	1.92709	0	0.00884907	0.884	1364	tags=33%, list=12%, signal=37%
GSE360_L_DONOVANI_VS_B_MALAYI_LOW_DOSE_DC_UP	GSE360_L_DONOVANI_VS_B_MALAYI_LOW_DOSE_DC_UP		150	0.519237	1.92644	0	0.00889985	0.885	1911	tags=31%, list=16%, signal=36%
GOBP_BIOMINERALIZATION	GOBP_BIOMINERALIZATION		116	0.540809	1.92619	0	0.00889374	0.885	1601	tags=37%, list=14%, signal=42%
KEGG_BASAL_CELL_CARCINOMA	KEGG_BASAL_CELL_CARCINOMA		38	0.646578	1.92512	0	0.00897403	0.889	2185	tags=53%, list=18%, signal=64%
GOBP_ENDOCRINE_HORMONE_SECRETION	GOBP_ENDOCRINE_HORMONE_SECRETION		27	0.679048	1.92426	0	0.00902782	0.891	1156	tags=37%, list=10%, signal=41%
FLETCHER_PBMC_BCG_10W_INFANT_PPD_STIMULATED_VS_UNSTIMULATED_10W_DN	FLETCHER_PBMC_BCG_10W_INFANT_PPD_STIMULATED_VS_UNSTIMULATED_10W_DN		154	0.517642	1.92385	0	0.00905531	0.893	2402	tags=44%, list=20%, signal=54%
GOBP_ADHERENS_JUNCTION_ORGANIZATION	GOBP_ADHERENS_JUNCTION_ORGANIZATION		46	0.617514	1.92341	0	0.00906582	0.893	2425	tags=57%, list=21%, signal=71%
GOBP_MODULATION_BY_SYMBIONT_OF_ENTRY_INTO_HOST	GOBP_MODULATION_BY_SYMBIONT_OF_ENTRY_INTO_HOST		27	0.699113	1.92279	0	0.00911407	0.897	1397	tags=30%, list=12%, signal=34%
GOBP_POSTSYNAPTIC_SPECIALIZATION_ORGANIZATION	GOBP_POSTSYNAPTIC_SPECIALIZATION_ORGANIZATION		18	0.747672	1.92192	0.0034188	0.00917887	0.899	555	tags=33%, list=5%, signal=35%
GSE22140_GERMFREE_VS_SPF_MOUSE_CD4_TCELL_DN	GSE22140_GERMFREE_VS_SPF_MOUSE_CD4_TCELL_DN		166	0.512762	1.91956	0	0.00938153	0.903	1952	tags=33%, list=17%, signal=38%
GOBP_ESTABLISHMENT_OF_TISSUE_POLARITY	GOBP_ESTABLISHMENT_OF_TISSUE_POLARITY		101	0.545514	1.91805	0	0.00954906	0.911	1518	tags=25%, list=13%, signal=28%
GOBP_CELLULAR_RESPONSE_TO_VASCULAR_ENDOTHELIAL_GROWTH_FACTOR_STIMULUS	GOBP_CELLULAR_RESPONSE_TO_VASCULAR_ENDOTHELIAL_GROWTH_FACTOR_STIMULUS		54	0.604275	1.91777	0	0.009528	0.911	1853	tags=44%, list=16%, signal=52%
GOBP_MORPHOGENESIS_OF_A_BRANCHING_STRUCTURE	GOBP_MORPHOGENESIS_OF_A_BRANCHING_STRUCTURE		127	0.529877	1.91686	0	0.00959827	0.915	1687	tags=41%, list=14%, signal=47%
IL2_UP.V1_UP	IL2_UP.V1_UP		127	0.526046	1.91628	0	0.00963067	0.917	1867	tags=39%, list=16%, signal=45%
GOMF_CYTOKINE_ACTIVITY	GOMF_CYTOKINE_ACTIVITY		98	0.539075	1.91619	0	0.00959718	0.917	1812	tags=37%, list=15%, signal=43%
GOBP_POSITIVE_REGULATION_OF_BLOOD_VESSEL_ENDOTHELIAL_CELL_MIGRATION	GOBP_POSITIVE_REGULATION_OF_BLOOD_VESSEL_ENDOTHELIAL_CELL_MIGRATION		46	0.620563	1.91566	0	0.00961301	0.918	1417	tags=41%, list=12%, signal=47%
GOBP_NEGATIVE_REGULATION_OF_PEPTIDASE_ACTIVITY	GOBP_NEGATIVE_REGULATION_OF_PEPTIDASE_ACTIVITY		131	0.51751	1.9143	0	0.00976682	0.919	1052	tags=27%, list=9%, signal=30%
GOBP_LYMPH_VESSEL_DEVELOPMENT	GOBP_LYMPH_VESSEL_DEVELOPMENT		22	0.707781	1.91401	0.00169492	0.0097778	0.92	1867	tags=68%, list=16%, signal=81%
GOBP_NEGATIVE_REGULATION_OF_HORMONE_SECRETION	GOBP_NEGATIVE_REGULATION_OF_HORMONE_SECRETION		35	0.659168	1.91289	0	0.00988952	0.923	809	tags=31%, list=7%, signal=34%
GOBP_BONE_MINERALIZATION	GOBP_BONE_MINERALIZATION		89	0.553362	1.91277	0	0.00987172	0.924	1601	tags=40%, list=14%, signal=46%
GOBP_CELLULAR_EXTRAVASATION	GOBP_CELLULAR_EXTRAVASATION		54	0.596078	1.91102	0.00327869	0.0100739	0.925	1603	tags=43%, list=14%, signal=49%
GOBP_EMBRYONIC_DIGESTIVE_TRACT_DEVELOPMENT	GOBP_EMBRYONIC_DIGESTIVE_TRACT_DEVELOPMENT		21	0.712628	1.91098	0.00168919	0.0100396	0.925	1006	tags=43%, list=9%, signal=47%
GOCC_PROTEIN_COMPLEX_INVOLVED_IN_CELL_ADHESION	GOCC_PROTEIN_COMPLEX_INVOLVED_IN_CELL_ADHESION		31	0.67873	1.90977	0.00332226	0.0101642	0.929	1587	tags=48%, list=13%, signal=56%
GSE22886_DAY0_VS_DAY1_MONOCYTE_IN_CULTURE_DN	GSE22886_DAY0_VS_DAY1_MONOCYTE_IN_CULTURE_DN		164	0.503067	1.90904	0	0.0102089	0.931	1599	tags=25%, list=14%, signal=29%
GOMF_FRIZZLED_BINDING	GOMF_FRIZZLED_BINDING		21	0.714819	1.90855	0	0.0102337	0.932	954	tags=43%, list=8%, signal=47%
GOBP_DOPAMINERGIC_NEURON_DIFFERENTIATION	GOBP_DOPAMINERGIC_NEURON_DIFFERENTIATION		21	0.718978	1.90787	0	0.0102617	0.933	1448	tags=33%, list=12%, signal=38%
GOBP_HORMONE_TRANSPORT	GOBP_HORMONE_TRANSPORT		187	0.499291	1.90751	0	0.010274	0.933	1254	tags=24%, list=11%, signal=26%
GOBP_PLATELET_DEGRANULATION	GOBP_PLATELET_DEGRANULATION		97	0.548482	1.90739	0	0.0102512	0.933	2157	tags=36%, list=18%, signal=44%
GOBP_POSITIVE_REGULATION_OF_RECEPTOR_MEDIATED_ENDOCYTOSIS	GOBP_POSITIVE_REGULATION_OF_RECEPTOR_MEDIATED_ENDOCYTOSIS		39	0.633815	1.90737	0.00174216	0.0102094	0.933	1760	tags=41%, list=15%, signal=48%
GOBP_REGULATION_OF_CELLULAR_EXTRAVASATION	GOBP_REGULATION_OF_CELLULAR_EXTRAVASATION		26	0.699099	1.90727	0	0.0102103	0.935	1858	tags=58%, list=16%, signal=68%
GOBP_UROGENITAL_SYSTEM_DEVELOPMENT	GOBP_UROGENITAL_SYSTEM_DEVELOPMENT		233	0.483898	1.90663	0	0.0102613	0.935	1760	tags=39%, list=15%, signal=44%
GOBP_NEGATIVE_REGULATION_OF_RESPONSE_TO_EXTERNAL_STIMULUS	GOBP_NEGATIVE_REGULATION_OF_RESPONSE_TO_EXTERNAL_STIMULUS		242	0.485696	1.90587	0	0.0103154	0.936	2017	tags=33%, list=17%, signal=39%
GOBP_SECONDARY_PALATE_DEVELOPMENT	GOBP_SECONDARY_PALATE_DEVELOPMENT		18	0.742569	1.90257	0.00168919	0.0107266	0.942	1296	tags=50%, list=11%, signal=56%
HP_MEDIAN_CLEFT_LIP	HP_MEDIAN_CLEFT_LIP		27	0.680376	1.90245	0.0016835	0.010714	0.942	1700	tags=56%, list=14%, signal=65%
GOBP_CANONICAL_WNT_SIGNALING_PATHWAY	GOBP_CANONICAL_WNT_SIGNALING_PATHWAY		249	0.48477	1.90178	0	0.0107846	0.944	1569	tags=27%, list=13%, signal=31%
GOBP_SPINAL_CORD_DEVELOPMENT	GOBP_SPINAL_CORD_DEVELOPMENT		52	0.605548	1.90087	0	0.0108659	0.944	1687	tags=42%, list=14%, signal=49%
GOBP_MUSCLE_CELL_MIGRATION	GOBP_MUSCLE_CELL_MIGRATION		69	0.577876	1.8989	0.00157978	0.0110962	0.949	1998	tags=45%, list=17%, signal=54%
CYCLIN_D1_UP.V1_UP	CYCLIN_D1_UP.V1_UP		123	0.520479	1.89734	0	0.0113064	0.954	2515	tags=43%, list=21%, signal=54%
GOBP_REGULATION_OF_MESENCHYMAL_CELL_PROLIFERATION	GOBP_REGULATION_OF_MESENCHYMAL_CELL_PROLIFERATION		20	0.7321	1.89724	0.00174216	0.0112806	0.954	1687	tags=60%, list=14%, signal=70%
GOBP_REGULATION_OF_CELLULAR_RESPONSE_TO_GROWTH_FACTOR_STIMULUS	GOBP_REGULATION_OF_CELLULAR_RESPONSE_TO_GROWTH_FACTOR_STIMULUS		194	0.494093	1.8965	0	0.0113663	0.954	1379	tags=30%, list=12%, signal=34%
GOBP_RESPONSE_TO_TRANSFORMING_GROWTH_FACTOR_BETA	GOBP_RESPONSE_TO_TRANSFORMING_GROWTH_FACTOR_BETA		188	0.505477	1.89608	0	0.01137	0.955	1906	tags=35%, list=16%, signal=41%
GOBP_POSITIVE_REGULATION_OF_WOUND_HEALING	GOBP_POSITIVE_REGULATION_OF_WOUND_HEALING		40	0.628144	1.89565	0	0.0113994	0.957	866	tags=40%, list=7%, signal=43%
KRAS.LUNG_UP.V1_UP	KRAS.LUNG_UP.V1_UP		73	0.572018	1.89538	0	0.011392	0.957	1313	tags=36%, list=11%, signal=40%
GOBP_POSITIVE_REGULATION_OF_NITRIC_OXIDE_METABOLIC_PROCESS	GOBP_POSITIVE_REGULATION_OF_NITRIC_OXIDE_METABOLIC_PROCESS		28	0.674608	1.89382	0	0.011589	0.959	1499	tags=36%, list=13%, signal=41%
GOBP_EMBRYONIC_ORGAN_DEVELOPMENT	GOBP_EMBRYONIC_ORGAN_DEVELOPMENT		271	0.476912	1.89281	0	0.0117375	0.961	1948	tags=35%, list=16%, signal=41%
GOBP_POSITIVE_REGULATION_OF_CELL_MIGRATION_INVOLVED_IN_SPROUTING_ANGIOGENESIS	GOBP_POSITIVE_REGULATION_OF_CELL_MIGRATION_INVOLVED_IN_SPROUTING_ANGIOGENESIS		18	0.726328	1.89211	0.00168919	0.0118231	0.963	1417	tags=56%, list=12%, signal=63%
IL21_UP.V1_UP	IL21_UP.V1_UP		102	0.527954	1.89053	0	0.0120413	0.964	1669	tags=36%, list=14%, signal=42%
GOBP_MUSCLE_CELL_PROLIFERATION	GOBP_MUSCLE_CELL_PROLIFERATION		135	0.520136	1.89037	0	0.012046	0.964	1964	tags=40%, list=17%, signal=47%
GSE8921_UNSTIM_0H_VS_TLR1_2_STIM_MONOCYTE_24H_UP	GSE8921_UNSTIM_0H_VS_TLR1_2_STIM_MONOCYTE_24H_UP		122	0.527376	1.89025	0	0.0120184	0.964	1905	tags=35%, list=16%, signal=42%
GOBP_EMBRYONIC_MORPHOGENESIS	GOBP_EMBRYONIC_MORPHOGENESIS		380	0.457369	1.88888	0	0.0121654	0.966	1922	tags=32%, list=16%, signal=37%
HP_VERTEBRAL_COMPRESSION_FRACTURES	HP_VERTEBRAL_COMPRESSION_FRACTURES		27	0.670643	1.88826	0	0.0122654	0.967	1704	tags=41%, list=14%, signal=47%
GOBP_REGULATION_OF_CHEMOTAXIS	GOBP_REGULATION_OF_CHEMOTAXIS		170	0.501163	1.88812	0	0.0122373	0.968	1828	tags=34%, list=15%, signal=39%
GOBP_SENSORY_ORGAN_MORPHOGENESIS	GOBP_SENSORY_ORGAN_MORPHOGENESIS		149	0.51055	1.88735	0	0.012315	0.968	1396	tags=31%, list=12%, signal=35%
GOBP_POSITIVE_REGULATION_OF_EPITHELIAL_CELL_MIGRATION	GOBP_POSITIVE_REGULATION_OF_EPITHELIAL_CELL_MIGRATION		125	0.521278	1.88668	0	0.0123536	0.968	1885	tags=33%, list=16%, signal=39%
HP_ABNORMALITY_OF_THE_CARPAL_BONES	HP_ABNORMALITY_OF_THE_CARPAL_BONES		59	0.573346	1.88654	0	0.0123185	0.968	1704	tags=34%, list=14%, signal=39%
WNT_UP.V1_UP	WNT_UP.V1_UP		100	0.534479	1.88572	0	0.0124196	0.97	1986	tags=40%, list=17%, signal=48%
GSE3039_ALPHAALPHA_VS_ALPHABETA_CD8_TCELL_UP	GSE3039_ALPHAALPHA_VS_ALPHABETA_CD8_TCELL_UP		158	0.503437	1.88522	0	0.0124542	0.972	1982	tags=30%, list=17%, signal=36%
GSE3039_NKT_CELL_VS_B2_BCELL_DN	GSE3039_NKT_CELL_VS_B2_BCELL_DN		159	0.497942	1.88441	0	0.0125335	0.972	2047	tags=32%, list=17%, signal=38%
HP_POOR_WOUND_HEALING	HP_POOR_WOUND_HEALING		19	0.719294	1.88429	0	0.012512	0.973	1733	tags=63%, list=15%, signal=74%
GOBP_MORPHOGENESIS_OF_A_POLARIZED_EPITHELIUM	GOBP_MORPHOGENESIS_OF_A_POLARIZED_EPITHELIUM		117	0.525267	1.88387	0	0.0125217	0.973	1683	tags=25%, list=14%, signal=29%
GOBP_CENTRAL_NERVOUS_SYSTEM_PROJECTION_NEURON_AXONOGENESIS	GOBP_CENTRAL_NERVOUS_SYSTEM_PROJECTION_NEURON_AXONOGENESIS		21	0.71861	1.88233	0.00169205	0.0127022	0.974	1620	tags=52%, list=14%, signal=61%
GOBP_EMBRYONIC_SKELETAL_SYSTEM_DEVELOPMENT	GOBP_EMBRYONIC_SKELETAL_SYSTEM_DEVELOPMENT		79	0.555302	1.88147	0	0.0128	0.974	2547	tags=48%, list=22%, signal=61%
GOBP_MULTI_MULTICELLULAR_ORGANISM_PROCESS	GOBP_MULTI_MULTICELLULAR_ORGANISM_PROCESS		121	0.522633	1.88146	0	0.0127541	0.974	2054	tags=38%, list=17%, signal=46%
HOWARD_PBMC_INACT_MONOV_INFLUENZA_A_INDONESIA_05_2005_H5N1_AGE_19_39YO_AS03_ADJUVANT_VS_BUFFER_1DY_DN	HOWARD_PBMC_INACT_MONOV_INFLUENZA_A_INDONESIA_05_2005_H5N1_AGE_19_39YO_AS03_ADJUVANT_VS_BUFFER_1DY_DN		17	0.744799	1.88067	0.00372439	0.0128439	0.974	2233	tags=71%, list=19%, signal=87%
GOBP_POSITIVE_REGULATION_OF_PRI_MIRNA_TRANSCRIPTION_BY_RNA_POLYMERASE_II	GOBP_POSITIVE_REGULATION_OF_PRI_MIRNA_TRANSCRIPTION_BY_RNA_POLYMERASE_II		34	0.645929	1.87982	0	0.0129398	0.975	1596	tags=38%, list=14%, signal=44%
GOBP_REGULATION_OF_VASCULAR_PERMEABILITY	GOBP_REGULATION_OF_VASCULAR_PERMEABILITY		29	0.653661	1.87966	0	0.0129208	0.975	2063	tags=62%, list=17%, signal=75%
GOBP_NEGATIVE_REGULATION_OF_CELL_POPULATION_PROLIFERATION	GOBP_NEGATIVE_REGULATION_OF_CELL_POPULATION_PROLIFERATION		476	0.450476	1.87952	0	0.0128852	0.975	1977	tags=30%, list=17%, signal=35%
GSE360_DC_VS_MAC_T_GONDII_DN	GSE360_DC_VS_MAC_T_GONDII_DN		143	0.509199	1.87862	0	0.0129934	0.975	1642	tags=29%, list=14%, signal=33%
GSE3982_DC_VS_TH2_UP	GSE3982_DC_VS_TH2_UP		140	0.508618	1.87746	0	0.0131573	0.976	1984	tags=35%, list=17%, signal=42%
GSE10325_LUPUS_BCELL_VS_LUPUS_MYELOID_DN	GSE10325_LUPUS_BCELL_VS_LUPUS_MYELOID_DN		161	0.49957	1.87531	0	0.013486	0.978	2584	tags=42%, list=22%, signal=53%
GOBP_REGULATION_OF_WNT_SIGNALING_PATHWAY_PLANAR_CELL_POLARITY_PATHWAY	GOBP_REGULATION_OF_WNT_SIGNALING_PATHWAY_PLANAR_CELL_POLARITY_PATHWAY		15	0.763902	1.87514	0	0.0134686	0.978	1506	tags=67%, list=13%, signal=76%
P53_DN.V1_UP	P53_DN.V1_UP		125	0.52276	1.87504	0	0.0134416	0.978	2547	tags=49%, list=22%, signal=62%
HP_HEMOPTYSIS	HP_HEMOPTYSIS		45	0.606007	1.87487	0	0.0134147	0.978	1308	tags=36%, list=11%, signal=40%
GOBP_SENSORY_ORGAN_DEVELOPMENT	GOBP_SENSORY_ORGAN_DEVELOPMENT		322	0.468215	1.87437	0	0.0134403	0.978	1727	tags=30%, list=15%, signal=34%
GSE9988_ANTI_TREM1_VS_CTRL_TREATED_MONOCYTES_UP	GSE9988_ANTI_TREM1_VS_CTRL_TREATED_MONOCYTES_UP		158	0.504343	1.87433	0	0.0133974	0.978	1805	tags=30%, list=15%, signal=35%
GOBP_MESODERM_MORPHOGENESIS	GOBP_MESODERM_MORPHOGENESIS		44	0.611685	1.87432	0.00163132	0.0133515	0.978	1329	tags=41%, list=11%, signal=46%
GOBP_OVULATION_CYCLE	GOBP_OVULATION_CYCLE		41	0.604742	1.87346	0.00156006	0.013429	0.978	1258	tags=37%, list=11%, signal=41%
GOBP_HEART_DEVELOPMENT	GOBP_HEART_DEVELOPMENT		385	0.454686	1.87011	0	0.0139249	0.981	1452	tags=28%, list=12%, signal=31%
GOBP_CARDIAC_CHAMBER_MORPHOGENESIS	GOBP_CARDIAC_CHAMBER_MORPHOGENESIS		81	0.54821	1.86993	0	0.0139226	0.981	1814	tags=43%, list=15%, signal=51%
GOBP_NEGATIVE_REGULATION_OF_EPITHELIAL_CELL_MIGRATION	GOBP_NEGATIVE_REGULATION_OF_EPITHELIAL_CELL_MIGRATION		53	0.588115	1.86847	0	0.0141894	0.981	1867	tags=42%, list=16%, signal=49%
GSE8835_HEALTHY_VS_CLL_CD8_TCELL_DN	GSE8835_HEALTHY_VS_CLL_CD8_TCELL_DN		140	0.510879	1.8682	0	0.0141927	0.981	1306	tags=26%, list=11%, signal=29%
GOBP_BRANCHING_INVOLVED_IN_BLOOD_VESSEL_MORPHOGENESIS	GOBP_BRANCHING_INVOLVED_IN_BLOOD_VESSEL_MORPHOGENESIS		25	0.675694	1.86762	0.0034965	0.0142246	0.981	1778	tags=56%, list=15%, signal=66%
GSE2405_0H_VS_1.5H_A_PHAGOCYTOPHILUM_STIM_NEUTROPHIL_UP	GSE2405_0H_VS_1.5H_A_PHAGOCYTOPHILUM_STIM_NEUTROPHIL_UP		136	0.505852	1.86733	0	0.0142278	0.981	2105	tags=40%, list=18%, signal=49%
HALLMARK_APOPTOSIS	HALLMARK_APOPTOSIS		137	0.503279	1.8666	0	0.0143257	0.984	1749	tags=30%, list=15%, signal=35%
GOBP_CAMERA_TYPE_EYE_DEVELOPMENT	GOBP_CAMERA_TYPE_EYE_DEVELOPMENT		191	0.48544	1.8664	0	0.0143159	0.985	1323	tags=26%, list=11%, signal=29%
GOBP_MORPHOGENESIS_OF_AN_EPITHELIUM	GOBP_MORPHOGENESIS_OF_AN_EPITHELIUM		389	0.45784	1.86442	0	0.014689	0.987	1828	tags=33%, list=15%, signal=38%
GSE19198_CTRL_VS_IL21_TREATED_TCELL_24H_UP	GSE19198_CTRL_VS_IL21_TREATED_TCELL_24H_UP		166	0.503251	1.86416	0	0.0147093	0.987	1886	tags=33%, list=16%, signal=38%
GOBP_POSITIVE_REGULATION_OF_MESENCHYMAL_CELL_PROLIFERATION	GOBP_POSITIVE_REGULATION_OF_MESENCHYMAL_CELL_PROLIFERATION		17	0.744498	1.86406	0	0.0146796	0.987	1687	tags=65%, list=14%, signal=75%
GOBP_POSITIVE_REGULATION_OF_PROTEIN_KINASE_B_SIGNALING	GOBP_POSITIVE_REGULATION_OF_PROTEIN_KINASE_B_SIGNALING		124	0.51253	1.86353	0	0.0147463	0.988	2672	tags=52%, list=23%, signal=66%
GOBP_TRANSMEMBRANE_RECEPTOR_PROTEIN_SERINE_THREONINE_KINASE_SIGNALING_PATHWAY	GOBP_TRANSMEMBRANE_RECEPTOR_PROTEIN_SERINE_THREONINE_KINASE_SIGNALING_PATHWAY		239	0.4737	1.86187	0	0.0150359	0.992	1828	tags=35%, list=15%, signal=40%
GOBP_SMOOTH_MUSCLE_CELL_PROLIFERATION	GOBP_SMOOTH_MUSCLE_CELL_PROLIFERATION		101	0.519697	1.86103	0	0.015175	0.993	1964	tags=41%, list=17%, signal=48%
GOBP_REGENERATION	GOBP_REGENERATION		139	0.501684	1.86093	0	0.0151442	0.993	1428	tags=31%, list=12%, signal=35%
GOBP_NITRIC_OXIDE_MEDIATED_SIGNAL_TRANSDUCTION	GOBP_NITRIC_OXIDE_MEDIATED_SIGNAL_TRANSDUCTION		17	0.731854	1.86061	0	0.0151719	0.993	932	tags=53%, list=8%, signal=57%
GOBP_CELL_FATE_COMMITMENT	GOBP_CELL_FATE_COMMITMENT		129	0.511751	1.86013	0	0.0152147	0.993	1396	tags=37%, list=12%, signal=42%
HP_SPINAL_RIGIDITY	HP_SPINAL_RIGIDITY		39	0.620884	1.86007	0.0015674	0.015178	0.993	958	tags=33%, list=8%, signal=36%
GOBP_POSITIVE_REGULATION_OF_HORMONE_SECRETION	GOBP_POSITIVE_REGULATION_OF_HORMONE_SECRETION		69	0.55572	1.85927	0.0015456	0.0152628	0.993	1060	tags=25%, list=9%, signal=27%
GOMF_PEPTIDASE_REGULATOR_ACTIVITY	GOMF_PEPTIDASE_REGULATOR_ACTIVITY		116	0.512014	1.85883	0	0.0153018	0.994	1052	tags=27%, list=9%, signal=29%
GSE6092_UNSTIM_VS_IFNG_STIM_AND_B_BURGDORFERI_INF_ENDOTHELIAL_CELL_DN	GSE6092_UNSTIM_VS_IFNG_STIM_AND_B_BURGDORFERI_INF_ENDOTHELIAL_CELL_DN		104	0.52723	1.85874	0	0.0152773	0.994	2307	tags=42%, list=20%, signal=52%
GOBP_KERATAN_SULFATE_BIOSYNTHETIC_PROCESS	GOBP_KERATAN_SULFATE_BIOSYNTHETIC_PROCESS		20	0.707848	1.85637	0.00359712	0.0157735	0.995	1274	tags=40%, list=11%, signal=45%
GOMF_LAMININ_BINDING	GOMF_LAMININ_BINDING		23	0.689562	1.85544	0.00344234	0.0158884	0.995	2194	tags=65%, list=19%, signal=80%
GOBP_FEMALE_SEX_DIFFERENTIATION	GOBP_FEMALE_SEX_DIFFERENTIATION		74	0.54595	1.8551	0	0.0159099	0.995	1361	tags=30%, list=12%, signal=33%
GOBP_NEGATIVE_REGULATION_OF_SIGNALING_RECEPTOR_ACTIVITY	GOBP_NEGATIVE_REGULATION_OF_SIGNALING_RECEPTOR_ACTIVITY		26	0.669857	1.85504	0.00334448	0.0158838	0.995	1202	tags=38%, list=10%, signal=43%
GOBP_BLOOD_VESSEL_ENDOTHELIAL_CELL_PROLIFERATION_INVOLVED_IN_SPROUTING_ANGIOGENESIS	GOBP_BLOOD_VESSEL_ENDOTHELIAL_CELL_PROLIFERATION_INVOLVED_IN_SPROUTING_ANGIOGENESIS		20	0.703746	1.8549	0	0.0158667	0.995	1308	tags=55%, list=11%, signal=62%
GOMF_INTEGRIN_BINDING	GOMF_INTEGRIN_BINDING		118	0.509224	1.85445	0	0.0159298	0.995	1423	tags=35%, list=12%, signal=39%
HP_AORTIC_DISSECTION	HP_AORTIC_DISSECTION		28	0.653603	1.85442	0.00170068	0.0158831	0.995	1778	tags=46%, list=15%, signal=55%
GOBP_ENDOTHELIAL_CELL_APOPTOTIC_PROCESS	GOBP_ENDOTHELIAL_CELL_APOPTOTIC_PROCESS		41	0.603423	1.85292	0.00327869	0.0161101	0.995	1853	tags=44%, list=16%, signal=52%
GOMF_PROTEOGLYCAN_BINDING	GOMF_PROTEOGLYCAN_BINDING		27	0.672392	1.85244	0.00341297	0.0161864	0.995	1818	tags=52%, list=15%, signal=61%
GSE1460_CD4_THYMOCYTE_VS_THYMIC_STROMAL_CELL_DN	GSE1460_CD4_THYMOCYTE_VS_THYMIC_STROMAL_CELL_DN		159	0.494829	1.85166	0	0.0163003	0.995	2350	tags=38%, list=20%, signal=46%
HOWARD_NK_CELL_INACT_MONOV_INFLUENZA_A_INDONESIA_05_2005_H5N1_AGE_18_49YO_28DY_DN	HOWARD_NK_CELL_INACT_MONOV_INFLUENZA_A_INDONESIA_05_2005_H5N1_AGE_18_49YO_28DY_DN		49	0.583966	1.85056	0	0.0164894	0.995	1400	tags=39%, list=12%, signal=44%
GOBP_RESPONSE_TO_MINERALOCORTICOID	GOBP_RESPONSE_TO_MINERALOCORTICOID		19	0.714301	1.8504	0.00169492	0.0164708	0.995	1895	tags=53%, list=16%, signal=63%
GSE13485_DAY1_VS_DAY7_YF17D_VACCINE_PBMC_UP	GSE13485_DAY1_VS_DAY7_YF17D_VACCINE_PBMC_UP		58	0.574231	1.85039	0	0.0164204	0.995	1757	tags=50%, list=15%, signal=58%
GSE19772_HCMV_INFL_VS_HCMV_INF_MONOCYTES_AND_PI3K_INHIBITION_UP	GSE19772_HCMV_INFL_VS_HCMV_INF_MONOCYTES_AND_PI3K_INHIBITION_UP		128	0.509309	1.84979	0.00146199	0.0165177	0.995	2835	tags=45%, list=24%, signal=59%
HP_CONGENITAL_MUSCULAR_DYSTROPHY	HP_CONGENITAL_MUSCULAR_DYSTROPHY		17	0.730203	1.84883	0.00173611	0.0166722	0.995	1248	tags=47%, list=11%, signal=53%
GSE3203_WT_VS_IFNAR1_KO_INFLUENZA_INFECTED_LN_BCELL_DN	GSE3203_WT_VS_IFNAR1_KO_INFLUENZA_INFECTED_LN_BCELL_DN		121	0.515833	1.84863	0	0.0166761	0.995	2575	tags=42%, list=22%, signal=53%
GSE22886_TH1_VS_TH2_48H_ACT_UP	GSE22886_TH1_VS_TH2_48H_ACT_UP		124	0.507717	1.84774	0	0.016809	0.996	2130	tags=40%, list=18%, signal=49%
GOBP_SENSORY_SYSTEM_DEVELOPMENT	GOBP_SENSORY_SYSTEM_DEVELOPMENT		231	0.470746	1.8477	0	0.0167698	0.996	1393	tags=26%, list=12%, signal=29%
GOBP_BONE_MORPHOGENESIS	GOBP_BONE_MORPHOGENESIS		66	0.545969	1.84622	0	0.0170494	0.998	1327	tags=33%, list=11%, signal=37%
MEL18_DN.V1_DN	MEL18_DN.V1_DN		99	0.523644	1.84597	0.0014556	0.0170381	0.998	1249	tags=30%, list=11%, signal=34%
GOBP_PRI_MIRNA_TRANSCRIPTION_BY_RNA_POLYMERASE_II	GOBP_PRI_MIRNA_TRANSCRIPTION_BY_RNA_POLYMERASE_II		43	0.592947	1.84534	0	0.0171514	0.998	1958	tags=37%, list=17%, signal=44%
GSE6269_FLU_VS_STAPH_AUREUS_INF_PBMC_DN	GSE6269_FLU_VS_STAPH_AUREUS_INF_PBMC_DN		138	0.49766	1.84456	0	0.0172666	0.998	1735	tags=27%, list=15%, signal=31%
KRAS.DF.V1_UP	KRAS.DF.V1_UP		160	0.492486	1.84436	0	0.0172715	0.998	1479	tags=28%, list=13%, signal=31%
GOBP_NON_CANONICAL_WNT_SIGNALING_PATHWAY	GOBP_NON_CANONICAL_WNT_SIGNALING_PATHWAY		127	0.51234	1.84345	0	0.0174394	0.998	1639	tags=27%, list=14%, signal=31%
GOBP_RESPONSE_TO_PAIN	GOBP_RESPONSE_TO_PAIN		15	0.740205	1.84333	0.00178891	0.017413	0.998	1234	tags=47%, list=10%, signal=52%
GSE25123_IL4_VS_IL4_AND_ROSIGLITAZONE_STIM_PPARG_KO_MACROPHAGE_DAY10_DN	GSE25123_IL4_VS_IL4_AND_ROSIGLITAZONE_STIM_PPARG_KO_MACROPHAGE_DAY10_DN		141	0.502806	1.84312	0	0.0174008	0.998	1770	tags=28%, list=15%, signal=32%
GOBP_SMOOTH_MUSCLE_CELL_MIGRATION	GOBP_SMOOTH_MUSCLE_CELL_MIGRATION		59	0.566141	1.84196	0	0.0176221	0.998	1998	tags=46%, list=17%, signal=55%
HP_SYNOSTOSIS_OF_CARPALS_TARSALS	HP_SYNOSTOSIS_OF_CARPALS_TARSALS		28	0.655079	1.84177	0.00677966	0.017601	0.998	1428	tags=46%, list=12%, signal=53%
HP_BLUE_SCLERAE	HP_BLUE_SCLERAE		73	0.54894	1.84171	0.00151057	0.0175607	0.998	1989	tags=33%, list=17%, signal=39%
GOBP_REGULATION_OF_NOTCH_SIGNALING_PATHWAY	GOBP_REGULATION_OF_NOTCH_SIGNALING_PATHWAY		84	0.528069	1.84149	0	0.0175538	0.998	1933	tags=36%, list=16%, signal=42%
GOCC_ACTOMYOSIN	GOCC_ACTOMYOSIN		63	0.564071	1.84024	0.00158983	0.0177694	0.999	2671	tags=52%, list=23%, signal=67%
GOBP_BONE_DEVELOPMENT	GOBP_BONE_DEVELOPMENT		144	0.503788	1.83938	0	0.0179124	0.999	1858	tags=33%, list=16%, signal=39%
GOBP_POSITIVE_REGULATION_OF_FIBROBLAST_PROLIFERATION	GOBP_POSITIVE_REGULATION_OF_FIBROBLAST_PROLIFERATION		39	0.602163	1.83917	0	0.0178935	0.999	1436	tags=38%, list=12%, signal=44%
GOBP_NEURON_FATE_COMMITMENT	GOBP_NEURON_FATE_COMMITMENT		22	0.691203	1.83872	0	0.017951	0.999	1730	tags=59%, list=15%, signal=69%
LI_PBMC_MENOMUNE_A_C_Y_W_135_AGE_18_45YO_3DY_UP	LI_PBMC_MENOMUNE_A_C_Y_W_135_AGE_18_45YO_3DY_UP		21	0.689553	1.83861	0	0.0179212	0.999	3123	tags=71%, list=26%, signal=97%
CRX_DN.V1_DN	CRX_DN.V1_DN		96	0.523303	1.83827	0	0.0179242	0.999	1488	tags=35%, list=13%, signal=40%
GOBP_POSITIVE_REGULATION_OF_EXTRACELLULAR_MATRIX_ORGANIZATION	GOBP_POSITIVE_REGULATION_OF_EXTRACELLULAR_MATRIX_ORGANIZATION		19	0.704175	1.83807	0.00169205	0.017911	0.999	1047	tags=42%, list=9%, signal=46%
GOBP_MUSCLE_STRUCTURE_DEVELOPMENT	GOBP_MUSCLE_STRUCTURE_DEVELOPMENT		405	0.444667	1.83762	0	0.0179623	0.999	1474	tags=27%, list=12%, signal=29%
GSE15750_WT_VS_TRAF6KO_DAY10_EFF_CD8_TCELL_DN	GSE15750_WT_VS_TRAF6KO_DAY10_EFF_CD8_TCELL_DN		115	0.509837	1.83713	0	0.0180162	0.999	2258	tags=40%, list=19%, signal=49%
GOMF_CADHERIN_BINDING_INVOLVED_IN_CELL_CELL_ADHESION	GOMF_CADHERIN_BINDING_INVOLVED_IN_CELL_CELL_ADHESION		15	0.741575	1.83464	0.0017094	0.0186536	0.999	2493	tags=73%, list=21%, signal=93%
GSE13173_UNTREATED_VS_IL12_TREATED_ACT_CD8_TCELL_UP	GSE13173_UNTREATED_VS_IL12_TREATED_ACT_CD8_TCELL_UP		59	0.573696	1.83361	0	0.0188494	0.999	1681	tags=46%, list=14%, signal=53%
GOBP_REGULATION_OF_EXTRACELLULAR_MATRIX_DISASSEMBLY	GOBP_REGULATION_OF_EXTRACELLULAR_MATRIX_DISASSEMBLY		15	0.739132	1.8334	0	0.018839	0.999	463	tags=33%, list=4%, signal=35%
GOBP_POSITIVE_REGULATION_OF_OSTEOBLAST_DIFFERENTIATION	GOBP_POSITIVE_REGULATION_OF_OSTEOBLAST_DIFFERENTIATION		47	0.576853	1.83318	0	0.0188395	0.999	1596	tags=45%, list=14%, signal=51%
GOBP_REGULATION_OF_FIBROBLAST_GROWTH_FACTOR_RECEPTOR_SIGNALING_PATHWAY	GOBP_REGULATION_OF_FIBROBLAST_GROWTH_FACTOR_RECEPTOR_SIGNALING_PATHWAY		16	0.736794	1.83247	0	0.0189802	0.999	483	tags=38%, list=4%, signal=39%
GOBP_SOMITE_DEVELOPMENT	GOBP_SOMITE_DEVELOPMENT		55	0.558782	1.8317	0.003125	0.019091	0.999	1687	tags=40%, list=14%, signal=46%
GSE5679_CTRL_VS_PPARG_LIGAND_ROSIGLITAZONE_AND_RARA_AGONIST_AM580_TREATED_DC_DN	GSE5679_CTRL_VS_PPARG_LIGAND_ROSIGLITAZONE_AND_RARA_AGONIST_AM580_TREATED_DC_DN		159	0.489624	1.82994	0	0.0194801	0.999	1591	tags=29%, list=13%, signal=33%
MTOR_UP.V1_DN	MTOR_UP.V1_DN		132	0.491959	1.82992	0	0.019434	0.999	1858	tags=33%, list=16%, signal=38%
GOBP_NEGATIVE_REGULATION_OF_LEUKOCYTE_CHEMOTAXIS	GOBP_NEGATIVE_REGULATION_OF_LEUKOCYTE_CHEMOTAXIS		15	0.730608	1.82986	0	0.0193856	0.999	803	tags=53%, list=7%, signal=57%
GOBP_MUSCLE_ORGAN_MORPHOGENESIS	GOBP_MUSCLE_ORGAN_MORPHOGENESIS		44	0.585319	1.82956	0	0.0194026	0.999	1778	tags=48%, list=15%, signal=56%
GOBP_REGULATION_OF_LEUKOCYTE_MIGRATION	GOBP_REGULATION_OF_LEUKOCYTE_MIGRATION		155	0.48762	1.82918	0	0.0194326	0.999	1858	tags=33%, list=16%, signal=39%
GOBP_CELL_CELL_ADHESION_VIA_PLASMA_MEMBRANE_ADHESION_MOLECULES	GOBP_CELL_CELL_ADHESION_VIA_PLASMA_MEMBRANE_ADHESION_MOLECULES		127	0.507023	1.82885	0	0.0194468	0.999	1675	tags=39%, list=14%, signal=45%
GOMF_TRANSMEMBRANE_RECEPTOR_PROTEIN_TYROSINE_KINASE_ACTIVITY	GOMF_TRANSMEMBRANE_RECEPTOR_PROTEIN_TYROSINE_KINASE_ACTIVITY		49	0.592853	1.82883	0	0.0193963	0.999	2672	tags=65%, list=23%, signal=84%
GOBP_POSITIVE_REGULATION_OF_ERBB_SIGNALING_PATHWAY	GOBP_POSITIVE_REGULATION_OF_ERBB_SIGNALING_PATHWAY		26	0.663865	1.82813	0.00348432	0.0195215	0.999	476	tags=23%, list=4%, signal=24%
GOBP_PATHWAY_RESTRICTED_SMAD_PROTEIN_PHOSPHORYLATION	GOBP_PATHWAY_RESTRICTED_SMAD_PROTEIN_PHOSPHORYLATION		44	0.59388	1.8281	0	0.0194761	0.999	1888	tags=41%, list=16%, signal=49%
GSE26559_TCF1_KO_VS_WT_LIN_NEG_CELL_DN	GSE26559_TCF1_KO_VS_WT_LIN_NEG_CELL_DN		118	0.505415	1.8277	0	0.0195288	0.999	1072	tags=21%, list=9%, signal=23%
GOBP_HEART_TRABECULA_MORPHOGENESIS	GOBP_HEART_TRABECULA_MORPHOGENESIS		20	0.699094	1.82726	0.00168919	0.0196117	0.999	1778	tags=55%, list=15%, signal=65%
GOBP_POSITIVE_REGULATION_OF_EPITHELIAL_CELL_APOPTOTIC_PROCESS	GOBP_POSITIVE_REGULATION_OF_EPITHELIAL_CELL_APOPTOTIC_PROCESS		25	0.661664	1.82679	0.00681431	0.019679	0.999	1269	tags=40%, list=11%, signal=45%
GOBP_REGIONALIZATION	GOBP_REGIONALIZATION		197	0.476364	1.82651	0	0.0197077	0.999	1352	tags=31%, list=11%, signal=35%
HALLMARK_UV_RESPONSE_DN	HALLMARK_UV_RESPONSE_DN		131	0.501379	1.82641	0	0.0196701	0.999	2191	tags=37%, list=19%, signal=45%
GOBP_NEGATIVE_REGULATION_OF_MUSCLE_HYPERTROPHY	GOBP_NEGATIVE_REGULATION_OF_MUSCLE_HYPERTROPHY		23	0.685306	1.8251	0.00164204	0.0199087	0.999	1721	tags=43%, list=15%, signal=51%
GSE45365_BCELL_VS_CD8_TCELL_DN	GSE45365_BCELL_VS_CD8_TCELL_DN		92	0.52011	1.82445	0.00145985	0.0200174	0.999	1591	tags=30%, list=13%, signal=35%
GSE40685_NAIVE_CD4_TCELL_VS_FOXP3_KO_TREG_PRECURSOR_DN	GSE40685_NAIVE_CD4_TCELL_VS_FOXP3_KO_TREG_PRECURSOR_DN		128	0.492751	1.82341	0	0.0202034	0.999	2395	tags=44%, list=20%, signal=54%
GSE21927_EL4_VS_MCA203_TUMOR_MONOCYTES_UP	GSE21927_EL4_VS_MCA203_TUMOR_MONOCYTES_UP		104	0.51861	1.82325	0	0.0202	0.999	1014	tags=26%, list=9%, signal=28%
GSE20715_0H_VS_24H_OZONE_LUNG_DN	GSE20715_0H_VS_24H_OZONE_LUNG_DN		154	0.488344	1.82299	0	0.0202119	0.999	1259	tags=24%, list=11%, signal=27%
HP_ABNORMAL_VASCULAR_PHYSIOLOGY	HP_ABNORMAL_VASCULAR_PHYSIOLOGY		181	0.476859	1.82262	0	0.0202861	0.999	1989	tags=30%, list=17%, signal=35%
GSE12505_WT_VS_E2_2_HET_PDC_UP	GSE12505_WT_VS_E2_2_HET_PDC_UP		83	0.527996	1.82239	0.00151976	0.0202875	0.999	1845	tags=35%, list=16%, signal=41%
GSE41176_UNSTIM_VS_ANTI_IGM_STIM_BCELL_1H_UP	GSE41176_UNSTIM_VS_ANTI_IGM_STIM_BCELL_1H_UP		154	0.492384	1.82221	0	0.0202792	0.999	1603	tags=28%, list=14%, signal=32%
GOMF_METALLOENDOPEPTIDASE_ACTIVITY	GOMF_METALLOENDOPEPTIDASE_ACTIVITY		78	0.538785	1.82086	0.00161031	0.0205762	1	1171	tags=38%, list=10%, signal=42%
HP_LIMB_PAIN	HP_LIMB_PAIN		18	0.718434	1.82077	0.00177305	0.020557	1	270	tags=22%, list=2%, signal=23%
GOBP_POSITIVE_REGULATION_OF_SIGNALING_RECEPTOR_ACTIVITY	GOBP_POSITIVE_REGULATION_OF_SIGNALING_RECEPTOR_ACTIVITY		30	0.64329	1.82062	0.00652529	0.0205553	1	1001	tags=33%, list=8%, signal=36%
GOCC_LYSOSOMAL_LUMEN	GOCC_LYSOSOMAL_LUMEN		72	0.541299	1.82059	0.00298954	0.0205093	1	1811	tags=31%, list=15%, signal=36%
HP_JOINT_SUBLUXATION	HP_JOINT_SUBLUXATION		19	0.704957	1.81997	0.00340715	0.0206034	1	2743	tags=79%, list=23%, signal=103%
GOBP_EXTRACELLULAR_MATRIX_DISASSEMBLY	GOBP_EXTRACELLULAR_MATRIX_DISASSEMBLY		56	0.567654	1.81976	0.00325203	0.020609	1	1846	tags=46%, list=16%, signal=55%
GOBP_GLIAL_CELL_MIGRATION	GOBP_GLIAL_CELL_MIGRATION		37	0.60414	1.81801	0.00325733	0.0209838	1	2234	tags=49%, list=19%, signal=60%
GOBP_EMBRYONIC_PLACENTA_MORPHOGENESIS	GOBP_EMBRYONIC_PLACENTA_MORPHOGENESIS		15	0.735169	1.81735	0.00174216	0.0210881	1	799	tags=40%, list=7%, signal=43%
GSE22313_HEALTHY_VS_SLE_MOUSE_CD4_TCELL_UP	GSE22313_HEALTHY_VS_SLE_MOUSE_CD4_TCELL_UP		136	0.491562	1.81699	0	0.021124	1	1770	tags=29%, list=15%, signal=33%
KRAS.LUNG.BREAST_UP.V1_DN	KRAS.LUNG.BREAST_UP.V1_DN		75	0.537698	1.81673	0	0.0211283	1	1828	tags=41%, list=15%, signal=49%
GOMF_LIPOPROTEIN_PARTICLE_RECEPTOR_ACTIVITY	GOMF_LIPOPROTEIN_PARTICLE_RECEPTOR_ACTIVITY		16	0.734778	1.81603	0.00335008	0.0212462	1	1525	tags=44%, list=13%, signal=50%
GOBP_POSITIVE_REGULATION_OF_CARTILAGE_DEVELOPMENT	GOBP_POSITIVE_REGULATION_OF_CARTILAGE_DEVELOPMENT		20	0.68463	1.81601	0.00176991	0.0211969	1	1329	tags=55%, list=11%, signal=62%
GOBP_CELL_MATRIX_ADHESION	GOBP_CELL_MATRIX_ADHESION		186	0.482414	1.8156	0	0.021237	1	2231	tags=40%, list=19%, signal=49%
GOCC_SARCOLEMMA	GOCC_SARCOLEMMA		91	0.527692	1.81505	0	0.0213199	1	2392	tags=40%, list=20%, signal=49%
HP_MILD_SHORT_STATURE	HP_MILD_SHORT_STATURE		15	0.745562	1.8142	0.00718133	0.021491	1	721	tags=33%, list=6%, signal=35%
GSE40666_STAT1_KO_VS_STAT4_KO_CD8_TCELL_WITH_IFNA_STIM_90MIN_DN	GSE40666_STAT1_KO_VS_STAT4_KO_CD8_TCELL_WITH_IFNA_STIM_90MIN_DN		88	0.525387	1.81408	0	0.0214847	1	1219	tags=33%, list=10%, signal=36%
GOBP_NEGATIVE_REGULATION_OF_BMP_SIGNALING_PATHWAY	GOBP_NEGATIVE_REGULATION_OF_BMP_SIGNALING_PATHWAY		33	0.621317	1.81373	0.00169492	0.0214974	1	1170	tags=33%, list=10%, signal=37%
GOBP_REGULATION_OF_WNT_SIGNALING_PATHWAY	GOBP_REGULATION_OF_WNT_SIGNALING_PATHWAY		275	0.455464	1.81345	0	0.0215221	1	1569	tags=26%, list=13%, signal=29%
GOBP_NEGATIVE_REGULATION_OF_ENDOTHELIAL_CELL_APOPTOTIC_PROCESS	GOBP_NEGATIVE_REGULATION_OF_ENDOTHELIAL_CELL_APOPTOTIC_PROCESS		21	0.681832	1.81331	0.00530973	0.0214942	1	1760	tags=52%, list=15%, signal=61%
HP_SUBARACHNOID_HEMORRHAGE	HP_SUBARACHNOID_HEMORRHAGE		27	0.65664	1.81297	0.00500835	0.0215258	1	1308	tags=37%, list=11%, signal=42%
GSE6259_33D1_POS_VS_DEC205_POS_FLT3L_INDUCED_SPLENIC_DC_UP	GSE6259_33D1_POS_VS_DEC205_POS_FLT3L_INDUCED_SPLENIC_DC_UP		143	0.491956	1.81261	0	0.0215855	1	1783	tags=29%, list=15%, signal=34%
KRAS.600.LUNG.BREAST_UP.V1_DN	KRAS.600.LUNG.BREAST_UP.V1_DN		144	0.489387	1.81179	0	0.0217696	1	1922	tags=37%, list=16%, signal=43%
GOBP_SUBSTRATE_ADHESION_DEPENDENT_CELL_SPREADING	GOBP_SUBSTRATE_ADHESION_DEPENDENT_CELL_SPREADING		89	0.531036	1.81166	0.00151515	0.0217603	1	1893	tags=36%, list=16%, signal=42%
GOBP_NEURON_PROJECTION_REGENERATION	GOBP_NEURON_PROJECTION_REGENERATION		43	0.605719	1.81105	0	0.021861	1	1826	tags=49%, list=15%, signal=58%
GSE4748_CTRL_VS_LPS_STIM_DC_3H_UP	GSE4748_CTRL_VS_LPS_STIM_DC_3H_UP		174	0.472271	1.81095	0	0.0218304	1	1241	tags=25%, list=11%, signal=28%
GOBP_NEGATIVE_REGULATION_OF_NIK_NF_KAPPAB_SIGNALING	GOBP_NEGATIVE_REGULATION_OF_NIK_NF_KAPPAB_SIGNALING		16	0.712795	1.81082	0.0035461	0.0218094	1	664	tags=19%, list=6%, signal=20%
GSE13485_DAY3_VS_DAY21_YF17D_VACCINE_PBMC_DN	GSE13485_DAY3_VS_DAY21_YF17D_VACCINE_PBMC_DN		47	0.581962	1.81055	0.00310078	0.0218327	1	1191	tags=36%, list=10%, signal=40%
GSE22140_HEALTHY_VS_ARTHRITIC_GERMFREE_MOUSE_CD4_TCELL_DN	GSE22140_HEALTHY_VS_ARTHRITIC_GERMFREE_MOUSE_CD4_TCELL_DN		165	0.480638	1.81044	0	0.0218071	1	1567	tags=27%, list=13%, signal=31%
GOBP_OVARIAN_FOLLICLE_DEVELOPMENT	GOBP_OVARIAN_FOLLICLE_DEVELOPMENT		33	0.623348	1.80998	0.00331126	0.0218719	1	1615	tags=33%, list=14%, signal=39%
GOBP_POSITIVE_REGULATION_OF_REACTIVE_OXYGEN_SPECIES_BIOSYNTHETIC_PROCESS	GOBP_POSITIVE_REGULATION_OF_REACTIVE_OXYGEN_SPECIES_BIOSYNTHETIC_PROCESS		36	0.623395	1.80991	0.0051458	0.0218418	1	1821	tags=36%, list=15%, signal=43%
GOBP_TRABECULA_MORPHOGENESIS	GOBP_TRABECULA_MORPHOGENESIS		32	0.629874	1.80954	0.00164474	0.0218692	1	1794	tags=56%, list=15%, signal=66%
HP_ADVANCED_ERUPTION_OF_TEETH	HP_ADVANCED_ERUPTION_OF_TEETH		32	0.612054	1.80908	0.00164745	0.0219402	1	1336	tags=38%, list=11%, signal=42%
GOBP_CELL_FATE_DETERMINATION	GOBP_CELL_FATE_DETERMINATION		21	0.673839	1.80888	0.00518135	0.0219354	1	2529	tags=81%, list=21%, signal=103%
GOBP_CAMERA_TYPE_EYE_MORPHOGENESIS	GOBP_CAMERA_TYPE_EYE_MORPHOGENESIS		75	0.534059	1.80878	0.00146199	0.0219031	1	1519	tags=32%, list=13%, signal=36%
HP_SYRINGOMYELIA	HP_SYRINGOMYELIA		19	0.702145	1.8084	0	0.0219689	1	1941	tags=37%, list=16%, signal=44%
GOBP_ORGAN_GROWTH	GOBP_ORGAN_GROWTH		110	0.504562	1.80834	0	0.0219276	1	1452	tags=35%, list=12%, signal=39%
GOBP_RESPONSE_TO_MECHANICAL_STIMULUS	GOBP_RESPONSE_TO_MECHANICAL_STIMULUS		145	0.48774	1.80831	0	0.0218797	1	1974	tags=37%, list=17%, signal=43%
HP_ABNORMAL_DELIVERY	HP_ABNORMAL_DELIVERY		46	0.591342	1.80827	0.00322581	0.0218388	1	1005	tags=33%, list=9%, signal=36%
GOCC_ACTIN_FILAMENT_BUNDLE	GOCC_ACTIN_FILAMENT_BUNDLE		61	0.552184	1.80784	0	0.0218884	1	2671	tags=56%, list=23%, signal=72%
GOCC_APICAL_JUNCTION_COMPLEX	GOCC_APICAL_JUNCTION_COMPLEX		95	0.520117	1.80733	0	0.0219828	1	2063	tags=42%, list=17%, signal=51%
GOBP_RESPONSE_TO_FLUID_SHEAR_STRESS	GOBP_RESPONSE_TO_FLUID_SHEAR_STRESS		26	0.64515	1.80565	0.00161812	0.0224587	1	1819	tags=42%, list=15%, signal=50%
GSE45365_CD8A_DC_VS_CD11B_DC_IFNAR_KO_MCMV_INFECTION_DN	GSE45365_CD8A_DC_VS_CD11B_DC_IFNAR_KO_MCMV_INFECTION_DN		81	0.524361	1.80437	0	0.0227529	1	1260	tags=31%, list=11%, signal=34%
GOBP_AXON_DEVELOPMENT	GOBP_AXON_DEVELOPMENT		353	0.440107	1.80426	0	0.0227216	1	1828	tags=31%, list=15%, signal=35%
GOBP_REGULATION_OF_ANIMAL_ORGAN_MORPHOGENESIS	GOBP_REGULATION_OF_ANIMAL_ORGAN_MORPHOGENESIS		132	0.491623	1.80381	0	0.0228131	1	1687	tags=30%, list=14%, signal=35%
GOBP_POSITIVE_REGULATION_OF_EPITHELIAL_CELL_PROLIFERATION	GOBP_POSITIVE_REGULATION_OF_EPITHELIAL_CELL_PROLIFERATION		133	0.491579	1.80338	0	0.022882	1	1816	tags=37%, list=15%, signal=43%
GSE4748_CYANOBACTERIUM_LPSLIKE_VS_LPS_AND_CYANOBACTERIUM_LPSLIKE_STIM_DC_3H_DN	GSE4748_CYANOBACTERIUM_LPSLIKE_VS_LPS_AND_CYANOBACTERIUM_LPSLIKE_STIM_DC_3H_DN		108	0.492896	1.80326	0	0.0228682	1	2288	tags=40%, list=19%, signal=49%
GSE24634_TREG_VS_TCONV_POST_DAY10_IL4_CONVERSION_DN	GSE24634_TREG_VS_TCONV_POST_DAY10_IL4_CONVERSION_DN		163	0.479861	1.80298	0	0.0228834	1	1825	tags=31%, list=15%, signal=36%
GOBP_EPITHELIAL_CELL_DIFFERENTIATION_INVOLVED_IN_KIDNEY_DEVELOPMENT	GOBP_EPITHELIAL_CELL_DIFFERENTIATION_INVOLVED_IN_KIDNEY_DEVELOPMENT		35	0.615448	1.80297	0	0.0228301	1	1687	tags=54%, list=14%, signal=63%
GOBP_OVULATION_CYCLE_PROCESS	GOBP_OVULATION_CYCLE_PROCESS		29	0.651941	1.80067	0.00162602	0.0234518	1	1060	tags=34%, list=9%, signal=38%
GOBP_CELL_DIFFERENTIATION_IN_SPINAL_CORD	GOBP_CELL_DIFFERENTIATION_IN_SPINAL_CORD		20	0.679289	1.80057	0.00874126	0.0234325	1	973	tags=45%, list=8%, signal=49%
E2F3_UP.V1_DN	E2F3_UP.V1_DN		87	0.518151	1.80053	0.00148148	0.0233914	1	985	tags=22%, list=8%, signal=24%
GOBP_SEGMENTATION	GOBP_SEGMENTATION		63	0.546329	1.80049	0.0015674	0.0233616	1	1352	tags=37%, list=11%, signal=41%
GOBP_OSTEOBLAST_DIFFERENTIATION	GOBP_OSTEOBLAST_DIFFERENTIATION		162	0.481124	1.80045	0	0.0233165	1	2039	tags=38%, list=17%, signal=45%
HP_DISPROPORTIONATE_SHORT_LIMB_SHORT_STATURE	HP_DISPROPORTIONATE_SHORT_LIMB_SHORT_STATURE		68	0.536558	1.79919	0.00154321	0.0236091	1	1518	tags=32%, list=13%, signal=37%
GOBP_REPRODUCTIVE_SYSTEM_DEVELOPMENT	GOBP_REPRODUCTIVE_SYSTEM_DEVELOPMENT		263	0.454353	1.79884	0	0.0236419	1	1428	tags=28%, list=12%, signal=31%
GOBP_SULFUR_COMPOUND_CATABOLIC_PROCESS	GOBP_SULFUR_COMPOUND_CATABOLIC_PROCESS		38	0.599333	1.79863	0.00330033	0.0236399	1	784	tags=26%, list=7%, signal=28%
LI_PBMC_MENACTRA_AGE_18_45YO_ANTI_POLYSACCHARIDE_ANTIBODY_CORRELATION_PROFILE_3DY_UP	LI_PBMC_MENACTRA_AGE_18_45YO_ANTI_POLYSACCHARIDE_ANTIBODY_CORRELATION_PROFILE_3DY_UP		24	0.674577	1.79796	0.00683761	0.0237958	1	1733	tags=42%, list=15%, signal=49%
GSE28783_CTRL_ANTI_MIR_VS_UNTREATED_ATHEROSCLEROSIS_MACROPHAGE_DN	GSE28783_CTRL_ANTI_MIR_VS_UNTREATED_ATHEROSCLEROSIS_MACROPHAGE_DN		142	0.487352	1.79715	0	0.024018	1	1258	tags=25%, list=11%, signal=27%
HP_MESOMELIA	HP_MESOMELIA		25	0.642482	1.79703	0.00169779	0.0239893	1	1518	tags=36%, list=13%, signal=41%
GOBP_ACUTE_INFLAMMATORY_RESPONSE	GOBP_ACUTE_INFLAMMATORY_RESPONSE		57	0.553094	1.79667	0.0031348	0.0240468	1	1786	tags=49%, list=15%, signal=58%
GOMF_CELL_ADHESION_MOLECULE_BINDING	GOMF_CELL_ADHESION_MOLECULE_BINDING		426	0.434697	1.79615	0	0.0241318	1	1827	tags=28%, list=15%, signal=32%
GOBP_OSTEOCLAST_DIFFERENTIATION	GOBP_OSTEOCLAST_DIFFERENTIATION		69	0.541446	1.79603	0.00310559	0.024103	1	2105	tags=36%, list=18%, signal=44%
MEK_UP.V1_UP	MEK_UP.V1_UP		150	0.481524	1.79517	0	0.0242516	1	2270	tags=43%, list=19%, signal=53%
GOBP_NEGATIVE_REGULATION_OF_ORGAN_GROWTH	GOBP_NEGATIVE_REGULATION_OF_ORGAN_GROWTH		23	0.661404	1.79354	0.00331675	0.024638	1	1112	tags=30%, list=9%, signal=34%
GOBP_REGULATION_OF_HORMONE_BIOSYNTHETIC_PROCESS	GOBP_REGULATION_OF_HORMONE_BIOSYNTHETIC_PROCESS		15	0.733243	1.79299	0.00728597	0.0247614	1	1288	tags=47%, list=11%, signal=52%
GOBP_REGULATION_OF_HORMONE_LEVELS	GOBP_REGULATION_OF_HORMONE_LEVELS		286	0.449466	1.79264	0	0.0248416	1	2011	tags=32%, list=17%, signal=38%
GSE36888_UNTREATED_VS_IL2_TREATED_TCELL_17H_DN	GSE36888_UNTREATED_VS_IL2_TREATED_TCELL_17H_DN		145	0.48475	1.79254	0	0.0248158	1	1626	tags=28%, list=14%, signal=32%
GOBP_REGULATION_OF_EMBRYONIC_DEVELOPMENT	GOBP_REGULATION_OF_EMBRYONIC_DEVELOPMENT		42	0.589427	1.7925	0.00163132	0.024771	1	964	tags=24%, list=8%, signal=26%
GSE29618_PRE_VS_DAY7_FLU_VACCINE_PDC_UP	GSE29618_PRE_VS_DAY7_FLU_VACCINE_PDC_UP		111	0.507108	1.79246	0	0.0247245	1	2198	tags=42%, list=19%, signal=52%
GOBP_NEGATIVE_REGULATION_OF_CHEMOTAXIS	GOBP_NEGATIVE_REGULATION_OF_CHEMOTAXIS		50	0.574882	1.79186	0.00321543	0.0248442	1	1813	tags=44%, list=15%, signal=52%
GSE23114_WT_VS_SLE2C1_MOUSE_PERITONEAL_CAVITY_B1A_BCELL_DN	GSE23114_WT_VS_SLE2C1_MOUSE_PERITONEAL_CAVITY_B1A_BCELL_DN		89	0.518387	1.79155	0.00147493	0.0248689	1	1776	tags=39%, list=15%, signal=46%
GOBP_NEGATIVE_REGULATION_OF_BLOOD_VESSEL_ENDOTHELIAL_CELL_MIGRATION	GOBP_NEGATIVE_REGULATION_OF_BLOOD_VESSEL_ENDOTHELIAL_CELL_MIGRATION		28	0.641239	1.79005	0.00323102	0.0252304	1	1721	tags=46%, list=15%, signal=54%
GOMF_CALCIUM_ION_BINDING	GOMF_CALCIUM_ION_BINDING		393	0.435949	1.78996	0	0.0252082	1	1872	tags=33%, list=16%, signal=37%
GSE9601_NFKB_INHIBITOR_VS_PI3K_INHIBITOR_TREATED_HCMV_INF_MONOCYTE_DN	GSE9601_NFKB_INHIBITOR_VS_PI3K_INHIBITOR_TREATED_HCMV_INF_MONOCYTE_DN		152	0.480842	1.7895	0	0.0252778	1	1827	tags=32%, list=15%, signal=37%
GOBP_POSITIVE_REGULATION_OF_SMOOTH_MUSCLE_CELL_PROLIFERATION	GOBP_POSITIVE_REGULATION_OF_SMOOTH_MUSCLE_CELL_PROLIFERATION		65	0.541919	1.78786	0	0.0256839	1	1964	tags=43%, list=17%, signal=51%
GSE8621_LPS_STIM_VS_LPS_PRIMED_AND_LPS_STIM_MACROPHAGE_UP	GSE8621_LPS_STIM_VS_LPS_PRIMED_AND_LPS_STIM_MACROPHAGE_UP		123	0.493221	1.78681	0	0.0259408	1	2347	tags=37%, list=20%, signal=46%
GOMF_SERINE_HYDROLASE_ACTIVITY	GOMF_SERINE_HYDROLASE_ACTIVITY		79	0.522227	1.78577	0.00148588	0.0261948	1	2278	tags=39%, list=19%, signal=48%
GOBP_LEUKOCYTE_ADHESION_TO_VASCULAR_ENDOTHELIAL_CELL	GOBP_LEUKOCYTE_ADHESION_TO_VASCULAR_ENDOTHELIAL_CELL		36	0.615158	1.78553	0	0.0262101	1	1603	tags=44%, list=14%, signal=51%
GOBP_CELLULAR_RESPONSE_TO_RETINOIC_ACID	GOBP_CELLULAR_RESPONSE_TO_RETINOIC_ACID		43	0.582218	1.7854	0.00332226	0.0261881	1	1221	tags=40%, list=10%, signal=44%
HP_CARPAL_SYNOSTOSIS	HP_CARPAL_SYNOSTOSIS		22	0.647494	1.78534	0.00840336	0.0261478	1	1428	tags=45%, list=12%, signal=52%
GOBP_KERATAN_SULFATE_METABOLIC_PROCESS	GOBP_KERATAN_SULFATE_METABOLIC_PROCESS		24	0.645879	1.78512	0.00674536	0.0261405	1	1274	tags=33%, list=11%, signal=37%
HP_ABNORMALITY_OF_THE_SYNOVIA	HP_ABNORMALITY_OF_THE_SYNOVIA		249	0.454289	1.78497	0	0.0261415	1	1884	tags=28%, list=16%, signal=33%
GOBP_EMBRYO_IMPLANTATION	GOBP_EMBRYO_IMPLANTATION		34	0.624176	1.78461	0.00506757	0.0261854	1	822	tags=32%, list=7%, signal=35%
GOBP_VASCULAR_WOUND_HEALING	GOBP_VASCULAR_WOUND_HEALING		17	0.690733	1.78458	0.0017331	0.0261331	1	643	tags=41%, list=5%, signal=43%
GSE27434_WT_VS_DNMT1_KO_TREG_DN	GSE27434_WT_VS_DNMT1_KO_TREG_DN		180	0.466743	1.78423	0	0.0261951	1	1499	tags=27%, list=13%, signal=30%
GSE23925_LIGHT_ZONE_VS_NAIVE_BCELL_UP	GSE23925_LIGHT_ZONE_VS_NAIVE_BCELL_UP		156	0.480326	1.78422	0	0.0261451	1	1517	tags=27%, list=13%, signal=30%
GOBP_POSITIVE_CHEMOTAXIS	GOBP_POSITIVE_CHEMOTAXIS		44	0.578842	1.7837	0	0.026251	1	2910	tags=59%, list=25%, signal=78%
GOBP_SIGNAL_RELEASE	GOBP_SIGNAL_RELEASE		285	0.446444	1.78342	0	0.026294	1	1294	tags=22%, list=11%, signal=25%
HP_PLATYSPONDYLY	HP_PLATYSPONDYLY		94	0.512486	1.78312	0	0.0263126	1	1989	tags=36%, list=17%, signal=43%
GSE3982_MAST_CELL_VS_BCELL_UP	GSE3982_MAST_CELL_VS_BCELL_UP		150	0.480421	1.78245	0	0.02646	1	1813	tags=26%, list=15%, signal=30%
GOBP_NEURAL_TUBE_DEVELOPMENT	GOBP_NEURAL_TUBE_DEVELOPMENT		110	0.496226	1.7822	0	0.0264843	1	1922	tags=31%, list=16%, signal=37%
IL15_UP.V1_UP	IL15_UP.V1_UP		136	0.486126	1.78189	0.0014245	0.0265244	1	1867	tags=33%, list=16%, signal=39%
HP_SHOULDER_DISLOCATION	HP_SHOULDER_DISLOCATION		15	0.722335	1.77997	0.00546448	0.0270984	1	377	tags=40%, list=3%, signal=41%
NOTCH_DN.V1_DN	NOTCH_DN.V1_DN		96	0.511291	1.77994	0.00287356	0.0270494	1	1192	tags=29%, list=10%, signal=32%
GOBP_MESENCHYME_MORPHOGENESIS	GOBP_MESENCHYME_MORPHOGENESIS		34	0.614104	1.77926	0.00806452	0.0271876	1	1778	tags=56%, list=15%, signal=66%
CYCLIN_D1_KE_.V1_UP	CYCLIN_D1_KE_.V1_UP		135	0.476472	1.7776	0	0.0276648	1	3093	tags=45%, list=26%, signal=61%
GOBP_REGULATION_OF_LIPASE_ACTIVITY	GOBP_REGULATION_OF_LIPASE_ACTIVITY		63	0.548066	1.77748	0.00149701	0.0276505	1	2644	tags=51%, list=22%, signal=65%
GOBP_ENDOCRINE_PROCESS	GOBP_ENDOCRINE_PROCESS		47	0.568909	1.77672	0	0.0277767	1	1254	tags=32%, list=11%, signal=36%
GOBP_ARTERY_DEVELOPMENT	GOBP_ARTERY_DEVELOPMENT		73	0.532251	1.7764	0	0.0278217	1	2499	tags=55%, list=21%, signal=69%
GSE14386_UNTREATED_VS_IFNA_TREATED_ACT_PBMC_MS_PATIENT_UP	GSE14386_UNTREATED_VS_IFNA_TREATED_ACT_PBMC_MS_PATIENT_UP		76	0.525754	1.77638	0.0030722	0.0277757	1	1556	tags=34%, list=13%, signal=39%
GOBP_REGULATION_OF_HEART_GROWTH	GOBP_REGULATION_OF_HEART_GROWTH		46	0.577146	1.77621	0.00321027	0.0277691	1	1596	tags=37%, list=14%, signal=43%
GOBP_COMPLEMENT_ACTIVATION	GOBP_COMPLEMENT_ACTIVATION		45	0.582189	1.77592	0.00317965	0.0278019	1	558	tags=22%, list=5%, signal=23%
PATEL_SKIN_OF_BODY_ZOSTAVAX_AGE_70_93YO_VZV_CHALLENGE_6HR_UP	PATEL_SKIN_OF_BODY_ZOSTAVAX_AGE_70_93YO_VZV_CHALLENGE_6HR_UP		245	0.45421	1.77586	0	0.0277523	1	1576	tags=22%, list=13%, signal=25%
HP_ISCHEMIC_STROKE	HP_ISCHEMIC_STROKE		23	0.658933	1.77577	0.00661157	0.0277263	1	1778	tags=43%, list=15%, signal=51%
PTEN_DN.V2_UP	PTEN_DN.V2_UP		80	0.518632	1.77574	0.0014556	0.0276771	1	1829	tags=39%, list=15%, signal=46%
GOBP_NEGATIVE_REGULATION_OF_CELL_SUBSTRATE_ADHESION	GOBP_NEGATIVE_REGULATION_OF_CELL_SUBSTRATE_ADHESION		50	0.569902	1.7757	0.00321027	0.0276299	1	1826	tags=40%, list=15%, signal=47%
GSE29618_MONOCYTE_VS_PDC_DAY7_FLU_VACCINE_UP	GSE29618_MONOCYTE_VS_PDC_DAY7_FLU_VACCINE_UP		167	0.469093	1.7755	0	0.0276276	1	2145	tags=34%, list=18%, signal=41%
GOBP_SMOOTH_MUSCLE_CONTRACTION	GOBP_SMOOTH_MUSCLE_CONTRACTION		66	0.540322	1.77547	0	0.0275769	1	1964	tags=39%, list=17%, signal=47%
GOBP_INFLAMMATORY_RESPONSE	GOBP_INFLAMMATORY_RESPONSE		493	0.423284	1.77527	0	0.0275651	1	2017	tags=32%, list=17%, signal=38%
GOCC_TIGHT_JUNCTION	GOCC_TIGHT_JUNCTION		83	0.51253	1.77494	0.00151286	0.0275997	1	2063	tags=41%, list=17%, signal=49%
GOBP_INOSITOL_LIPID_MEDIATED_SIGNALING	GOBP_INOSITOL_LIPID_MEDIATED_SIGNALING		148	0.483338	1.77354	0	0.0279847	1	2177	tags=37%, list=18%, signal=45%
HP_AXIAL_MUSCLE_WEAKNESS	HP_AXIAL_MUSCLE_WEAKNESS		18	0.690788	1.77324	0.00859107	0.0280413	1	1248	tags=39%, list=11%, signal=43%
GOBP_REGULATION_OF_MEMBRANE_PROTEIN_ECTODOMAIN_PROTEOLYSIS	GOBP_REGULATION_OF_MEMBRANE_PROTEIN_ECTODOMAIN_PROTEOLYSIS		22	0.662918	1.77302	0.00330033	0.0280613	1	2570	tags=59%, list=22%, signal=75%
GOBP_DEVELOPMENTAL_GROWTH	GOBP_DEVELOPMENTAL_GROWTH		422	0.430813	1.77239	0	0.0282074	1	1452	tags=25%, list=12%, signal=27%
GOBP_REGULATION_OF_TISSUE_REMODELING	GOBP_REGULATION_OF_TISSUE_REMODELING		57	0.547697	1.77195	0.00644122	0.0282729	1	1047	tags=25%, list=9%, signal=27%
HP_ABNORMAL_EPIPHYSIS_MORPHOLOGY_OF_THE_PHALANGES_OF_THE_HAND	HP_ABNORMAL_EPIPHYSIS_MORPHOLOGY_OF_THE_PHALANGES_OF_THE_HAND		28	0.631233	1.77192	0.00326264	0.0282256	1	1320	tags=29%, list=11%, signal=32%
GOCC_FILOPODIUM_MEMBRANE	GOCC_FILOPODIUM_MEMBRANE		16	0.720539	1.77155	0.00530035	0.0283078	1	1032	tags=38%, list=9%, signal=41%
GOCC_LAMELLIPODIUM_MEMBRANE	GOCC_LAMELLIPODIUM_MEMBRANE		19	0.684275	1.77038	0.00357782	0.0285872	1	2377	tags=63%, list=20%, signal=79%
GOBP_SALIVARY_GLAND_DEVELOPMENT	GOBP_SALIVARY_GLAND_DEVELOPMENT		22	0.662137	1.76998	0.005	0.0286665	1	1352	tags=41%, list=11%, signal=46%
GOBP_OUTFLOW_TRACT_MORPHOGENESIS	GOBP_OUTFLOW_TRACT_MORPHOGENESIS		51	0.568866	1.76948	0.00480769	0.0287569	1	1814	tags=49%, list=15%, signal=58%
HP_COXA_VARA	HP_COXA_VARA		46	0.567316	1.76869	0	0.0289453	1	1043	tags=30%, list=9%, signal=33%
GOBP_SMAD_PROTEIN_SIGNAL_TRANSDUCTION	GOBP_SMAD_PROTEIN_SIGNAL_TRANSDUCTION		50	0.560856	1.76767	0.00311526	0.029212	1	1639	tags=38%, list=14%, signal=44%
GOBP_CELL_CELL_SIGNALING_BY_WNT	GOBP_CELL_CELL_SIGNALING_BY_WNT		387	0.425506	1.76647	0	0.0295018	1	1569	tags=25%, list=13%, signal=27%
STK33_NOMO_UP	STK33_NOMO_UP		240	0.45071	1.76645	0	0.0294508	1	1782	tags=26%, list=15%, signal=30%
GOBP_RESPONSE_TO_PROGESTERONE	GOBP_RESPONSE_TO_PROGESTERONE		28	0.624541	1.76628	0.00165289	0.0294563	1	1192	tags=32%, list=10%, signal=36%
GOBP_NEGATIVE_REGULATION_OF_MONONUCLEAR_CELL_MIGRATION	GOBP_NEGATIVE_REGULATION_OF_MONONUCLEAR_CELL_MIGRATION		19	0.676953	1.76623	0.00535714	0.0294206	1	803	tags=37%, list=7%, signal=39%
STK33_UP	STK33_UP		231	0.446115	1.76614	0	0.0293849	1	1895	tags=29%, list=16%, signal=34%
GSE43955_TH0_VS_TGFB_IL6_TH17_ACT_CD4_TCELL_20H_UP	GSE43955_TH0_VS_TGFB_IL6_TH17_ACT_CD4_TCELL_20H_UP		153	0.469357	1.76553	0	0.0295171	1	1279	tags=18%, list=11%, signal=20%
GOBP_BRANCHING_MORPHOGENESIS_OF_AN_EPITHELIAL_TUBE	GOBP_BRANCHING_MORPHOGENESIS_OF_AN_EPITHELIAL_TUBE		96	0.511216	1.76504	0.00148148	0.0296211	1	1819	tags=44%, list=15%, signal=51%
GOBP_LEUKOCYTE_MIGRATION	GOBP_LEUKOCYTE_MIGRATION		332	0.436562	1.76488	0	0.0296021	1	1826	tags=30%, list=15%, signal=35%
GSE5589_WT_VS_IL10_KO_LPS_AND_IL10_STIM_MACROPHAGE_180MIN_DN	GSE5589_WT_VS_IL10_KO_LPS_AND_IL10_STIM_MACROPHAGE_180MIN_DN		60	0.537516	1.7647	0.00163399	0.0296128	1	1335	tags=35%, list=11%, signal=39%
GOBP_HYALURONAN_METABOLIC_PROCESS	GOBP_HYALURONAN_METABOLIC_PROCESS		31	0.614998	1.76459	0.005	0.029581	1	1737	tags=35%, list=15%, signal=41%
GOMF_PROTEASE_BINDING	GOMF_PROTEASE_BINDING		96	0.502891	1.76416	0.00155039	0.029671	1	611	tags=20%, list=5%, signal=21%
GOBP_REGULATION_OF_SPROUTING_ANGIOGENESIS	GOBP_REGULATION_OF_SPROUTING_ANGIOGENESIS		28	0.632784	1.76415	0	0.0296134	1	1329	tags=43%, list=11%, signal=48%
GSE18281_PERIMEDULLARY_CORTICAL_REGION_VS_WHOLE_MEDULLA_THYMUS_DN	GSE18281_PERIMEDULLARY_CORTICAL_REGION_VS_WHOLE_MEDULLA_THYMUS_DN		105	0.49801	1.76403	0.00145773	0.029611	1	1556	tags=25%, list=13%, signal=28%
GOBP_NERVE_DEVELOPMENT	GOBP_NERVE_DEVELOPMENT		41	0.571492	1.76396	0.0064	0.0295758	1	2597	tags=56%, list=22%, signal=72%
RB_DN.V1_DN	RB_DN.V1_DN		96	0.498543	1.76385	0	0.0295534	1	1997	tags=38%, list=17%, signal=45%
HP_BICONCAVE_VERTEBRAL_BODIES	HP_BICONCAVE_VERTEBRAL_BODIES		16	0.699638	1.76381	0.00894454	0.0295075	1	1652	tags=50%, list=14%, signal=58%
GOBP_CRANIAL_NERVE_DEVELOPMENT	GOBP_CRANIAL_NERVE_DEVELOPMENT		26	0.630764	1.76265	0.00673401	0.0298207	1	2105	tags=65%, list=18%, signal=79%
GOCC_CELL_CELL_JUNCTION	GOCC_CELL_CELL_JUNCTION		335	0.436494	1.76263	0	0.0297672	1	2162	tags=35%, list=18%, signal=42%
GOBP_TRANSFORMING_GROWTH_FACTOR_BETA_RECEPTOR_SIGNALING_PATHWAY	GOBP_TRANSFORMING_GROWTH_FACTOR_BETA_RECEPTOR_SIGNALING_PATHWAY		145	0.474941	1.76258	0	0.0297301	1	1906	tags=34%, list=16%, signal=40%
GOBP_REGULATION_OF_ENDOTHELIAL_CELL_CHEMOTAXIS	GOBP_REGULATION_OF_ENDOTHELIAL_CELL_CHEMOTAXIS		16	0.700832	1.76246	0.00884956	0.0297166	1	1417	tags=56%, list=12%, signal=64%
GOBP_CELL_JUNCTION_ASSEMBLY	GOBP_CELL_JUNCTION_ASSEMBLY		282	0.44037	1.76238	0	0.0296726	1	2377	tags=39%, list=20%, signal=48%
GOBP_DORSAL_VENTRAL_PATTERN_FORMATION	GOBP_DORSAL_VENTRAL_PATTERN_FORMATION		40	0.586736	1.76181	0.0048	0.0298236	1	1687	tags=40%, list=14%, signal=47%
GOBP_LYMPH_VESSEL_MORPHOGENESIS	GOBP_LYMPH_VESSEL_MORPHOGENESIS		17	0.703546	1.7616	0.0126812	0.0298336	1	1816	tags=71%, list=15%, signal=83%
GSE45365_NK_CELL_VS_BCELL_UP	GSE45365_NK_CELL_VS_BCELL_UP		175	0.465116	1.76147	0.00136612	0.0298273	1	1740	tags=23%, list=15%, signal=26%
HP_ABNORMAL_SCLERA_MORPHOLOGY	HP_ABNORMAL_SCLERA_MORPHOLOGY		84	0.517504	1.76116	0	0.0298912	1	1005	tags=23%, list=9%, signal=25%
GOBP_BROWN_FAT_CELL_DIFFERENTIATION	GOBP_BROWN_FAT_CELL_DIFFERENTIATION		32	0.606911	1.75944	0.00326264	0.0303902	1	1488	tags=38%, list=13%, signal=43%
GOBP_NEGATIVE_REGULATION_OF_FAT_CELL_DIFFERENTIATION	GOBP_NEGATIVE_REGULATION_OF_FAT_CELL_DIFFERENTIATION		35	0.599383	1.75839	0.00168067	0.0306939	1	1810	tags=34%, list=15%, signal=40%
GSE13411_IGM_VS_SWITCHED_MEMORY_BCELL_UP	GSE13411_IGM_VS_SWITCHED_MEMORY_BCELL_UP		95	0.502357	1.75809	0	0.0307183	1	2295	tags=40%, list=19%, signal=49%
GOBP_CENTRAL_NERVOUS_SYSTEM_NEURON_AXONOGENESIS	GOBP_CENTRAL_NERVOUS_SYSTEM_NEURON_AXONOGENESIS		26	0.628422	1.75801	0.00658979	0.0306837	1	1620	tags=42%, list=14%, signal=49%
HP_AVASCULAR_NECROSIS	HP_AVASCULAR_NECROSIS		59	0.537553	1.75784	0	0.0306884	1	1005	tags=22%, list=9%, signal=24%
ESC_V6.5_UP_LATE.V1_DN	ESC_V6.5_UP_LATE.V1_DN		138	0.476256	1.75693	0	0.0308987	1	1895	tags=33%, list=16%, signal=38%
GSE2585_CTEC_VS_THYMIC_MACROPHAGE_UP	GSE2585_CTEC_VS_THYMIC_MACROPHAGE_UP		150	0.475296	1.75648	0	0.0310021	1	1362	tags=24%, list=12%, signal=27%
GOBP_EYE_MORPHOGENESIS	GOBP_EYE_MORPHOGENESIS		93	0.507231	1.7556	0	0.0312341	1	1393	tags=31%, list=12%, signal=35%
GOBP_MOTOR_NEURON_AXON_GUIDANCE	GOBP_MOTOR_NEURON_AXON_GUIDANCE		18	0.692341	1.75556	0.00692042	0.0312059	1	1910	tags=44%, list=16%, signal=53%
GOBP_NEGATIVE_REGULATION_OF_SECRETION	GOBP_NEGATIVE_REGULATION_OF_SECRETION		93	0.50286	1.75551	0	0.0311655	1	1375	tags=27%, list=12%, signal=30%
GOBP_SYNCYTIUM_FORMATION	GOBP_SYNCYTIUM_FORMATION		35	0.60522	1.75514	0.00477707	0.0312237	1	2658	tags=57%, list=23%, signal=74%
GOBP_RESPIRATORY_SYSTEM_DEVELOPMENT	GOBP_RESPIRATORY_SYSTEM_DEVELOPMENT		135	0.484509	1.75492	0.0028777	0.0312238	1	1804	tags=37%, list=15%, signal=43%
HP_ABNORMAL_PERICARDIUM_MORPHOLOGY	HP_ABNORMAL_PERICARDIUM_MORPHOLOGY		49	0.562077	1.75346	0.00161812	0.0316319	1	2014	tags=37%, list=17%, signal=44%
GOBP_PEPTIDYL_TYROSINE_MODIFICATION	GOBP_PEPTIDYL_TYROSINE_MODIFICATION		277	0.442236	1.75298	0	0.0317414	1	1499	tags=25%, list=13%, signal=27%
GOBP_PROTEIN_HYDROXYLATION	GOBP_PROTEIN_HYDROXYLATION		25	0.631873	1.75257	0.0119048	0.0318174	1	1791	tags=40%, list=15%, signal=47%
GOBP_REGULATION_OF_PHOSPHOLIPASE_ACTIVITY	GOBP_REGULATION_OF_PHOSPHOLIPASE_ACTIVITY		46	0.566287	1.75226	0.0049505	0.031853	1	2311	tags=46%, list=20%, signal=57%
GOBP_MUSCLE_ORGAN_DEVELOPMENT	GOBP_MUSCLE_ORGAN_DEVELOPMENT		210	0.45272	1.75142	0	0.0321108	1	1623	tags=33%, list=14%, signal=37%
GOBP_REGULATION_OF_BIOMINERALIZATION	GOBP_REGULATION_OF_BIOMINERALIZATION		68	0.53273	1.751	0.003125	0.0322255	1	1601	tags=40%, list=14%, signal=46%
GOBP_REGULATION_OF_BMP_SIGNALING_PATHWAY	GOBP_REGULATION_OF_BMP_SIGNALING_PATHWAY		61	0.543373	1.75095	0.00323102	0.0321873	1	1379	tags=34%, list=12%, signal=39%
GOBP_REGULATION_OF_MORPHOGENESIS_OF_AN_EPITHELIUM	GOBP_REGULATION_OF_MORPHOGENESIS_OF_AN_EPITHELIUM		38	0.585104	1.75038	0.00629921	0.0323153	1	685	tags=37%, list=6%, signal=39%
GSE36392_TYPE_2_MYELOID_VS_MAC_IL25_TREATED_LUNG_UP	GSE36392_TYPE_2_MYELOID_VS_MAC_IL25_TREATED_LUNG_UP		112	0.485193	1.75035	0	0.0322668	1	2008	tags=46%, list=17%, signal=54%
HP_NATAL_TOOTH	HP_NATAL_TOOTH		26	0.632989	1.74909	0.00670017	0.0326457	1	1336	tags=38%, list=11%, signal=43%
GOBP_RECEPTOR_MEDIATED_ENDOCYTOSIS	GOBP_RECEPTOR_MEDIATED_ENDOCYTOSIS		189	0.452852	1.74898	0	0.0326226	1	1913	tags=30%, list=16%, signal=35%
GOCC_VACUOLAR_LUMEN	GOCC_VACUOLAR_LUMEN		127	0.477253	1.74887	0	0.0325961	1	1980	tags=28%, list=17%, signal=33%
GSE19923_WT_VS_HEB_AND_E2A_KO_DP_THYMOCYTE_DN	GSE19923_WT_VS_HEB_AND_E2A_KO_DP_THYMOCYTE_DN		172	0.455405	1.74873	0	0.0325904	1	1913	tags=27%, list=16%, signal=31%
GOBP_CELL_DIFFERENTIATION_INVOLVED_IN_KIDNEY_DEVELOPMENT	GOBP_CELL_DIFFERENTIATION_INVOLVED_IN_KIDNEY_DEVELOPMENT		39	0.588631	1.74863	0.00491803	0.0325589	1	1687	tags=54%, list=14%, signal=63%
GSE22025_UNTREATED_VS_TGFB1_TREATED_CD4_TCELL_DN	GSE22025_UNTREATED_VS_TGFB1_TREATED_CD4_TCELL_DN		124	0.480318	1.74815	0	0.0326625	1	2561	tags=42%, list=22%, signal=53%
GSE40274_IRF4_VS_FOXP3_AND_IRF4_TRANSDUCED_ACTIVATED_CD4_TCELL_DN	GSE40274_IRF4_VS_FOXP3_AND_IRF4_TRANSDUCED_ACTIVATED_CD4_TCELL_DN		66	0.539191	1.74767	0.00152905	0.032786	1	2025	tags=39%, list=17%, signal=47%
GOBP_INNER_EAR_MORPHOGENESIS	GOBP_INNER_EAR_MORPHOGENESIS		49	0.555911	1.74766	0.00157978	0.0327375	1	2785	tags=53%, list=24%, signal=69%
GSE9988_LOW_LPS_VS_CTRL_TREATED_MONOCYTE_UP	GSE9988_LOW_LPS_VS_CTRL_TREATED_MONOCYTE_UP		141	0.474641	1.74762	0.00147493	0.0326924	1	1116	tags=20%, list=9%, signal=22%
GOBP_PROTEIN_KINASE_C_SIGNALING	GOBP_PROTEIN_KINASE_C_SIGNALING		19	0.666898	1.74699	0.00735294	0.032861	1	1223	tags=53%, list=10%, signal=59%
GOBP_EAR_MORPHOGENESIS	GOBP_EAR_MORPHOGENESIS		60	0.535828	1.74654	0.00160772	0.0330223	1	2785	tags=48%, list=24%, signal=63%
GOBP_POSITIVE_REGULATION_OF_SYNAPTIC_TRANSMISSION	GOBP_POSITIVE_REGULATION_OF_SYNAPTIC_TRANSMISSION		80	0.516386	1.7444	0	0.0336697	1	1060	tags=23%, list=9%, signal=25%
GOBP_RESPONSE_TO_AXON_INJURY	GOBP_RESPONSE_TO_AXON_INJURY		53	0.544101	1.74432	0.00315956	0.0336486	1	1826	tags=36%, list=15%, signal=42%
GSE29618_PRE_VS_DAY7_POST_LAIV_FLU_VACCINE_PDC_UP	GSE29618_PRE_VS_DAY7_POST_LAIV_FLU_VACCINE_PDC_UP		102	0.492037	1.74413	0	0.0336578	1	1650	tags=35%, list=14%, signal=41%
GOBP_CHEMOKINE_PRODUCTION	GOBP_CHEMOKINE_PRODUCTION		68	0.518084	1.744	0.00305344	0.0336386	1	1826	tags=32%, list=15%, signal=38%
GOBP_BLOOD_VESSEL_REMODELING	GOBP_BLOOD_VESSEL_REMODELING		31	0.602309	1.74341	0.00688468	0.0338456	1	1393	tags=39%, list=12%, signal=44%
GSE30083_SP1_VS_SP2_THYMOCYTE_DN	GSE30083_SP1_VS_SP2_THYMOCYTE_DN		117	0.481496	1.74315	0	0.0338578	1	1059	tags=20%, list=9%, signal=21%
GSE7568_CTRL_VS_24H_TGFB_TREATED_MACROPHAGES_WITH_IL4_AND_DEXAMETHASONE_DN	GSE7568_CTRL_VS_24H_TGFB_TREATED_MACROPHAGES_WITH_IL4_AND_DEXAMETHASONE_DN		109	0.487312	1.74208	0	0.034209	1	1568	tags=31%, list=13%, signal=36%
GOBP_POSITIVE_REGULATION_OF_FAT_CELL_DIFFERENTIATION	GOBP_POSITIVE_REGULATION_OF_FAT_CELL_DIFFERENTIATION		47	0.556941	1.74187	0.00166113	0.0342222	1	2100	tags=47%, list=18%, signal=57%
GOBP_NEGATIVE_REGULATION_OF_GROWTH	GOBP_NEGATIVE_REGULATION_OF_GROWTH		182	0.451754	1.74152	0	0.0342836	1	1998	tags=32%, list=17%, signal=38%
GOBP_POSITIVE_REGULATION_OF_CHEMOTAXIS	GOBP_POSITIVE_REGULATION_OF_CHEMOTAXIS		104	0.48977	1.74151	0	0.0342251	1	1448	tags=28%, list=12%, signal=32%
GSE21033_CTRL_VS_POLYIC_STIM_DC_1H_UP	GSE21033_CTRL_VS_POLYIC_STIM_DC_1H_UP		123	0.482608	1.74089	0	0.0344023	1	2524	tags=43%, list=21%, signal=54%
ESC_V6.5_UP_LATE.V1_UP	ESC_V6.5_UP_LATE.V1_UP		135	0.475867	1.74048	0	0.0344796	1	1811	tags=31%, list=15%, signal=36%
GSE41867_DAY6_VS_DAY15_LCMV_ARMSTRONG_EFFECTOR_CD8_TCELL_UP	GSE41867_DAY6_VS_DAY15_LCMV_ARMSTRONG_EFFECTOR_CD8_TCELL_UP		116	0.482346	1.73999	0	0.0345881	1	1943	tags=34%, list=16%, signal=40%
HP_ACANTHOSIS_NIGRICANS	HP_ACANTHOSIS_NIGRICANS		31	0.592684	1.73987	0.00662252	0.0345791	1	1517	tags=42%, list=13%, signal=48%
GSE9946_IMMATURE_VS_MATURE_STIMULATORY_DC_DN	GSE9946_IMMATURE_VS_MATURE_STIMULATORY_DC_DN		67	0.514429	1.73963	0.00594354	0.0346294	1	1707	tags=36%, list=14%, signal=42%
GOBP_REGULATION_OF_KERATINOCYTE_PROLIFERATION	GOBP_REGULATION_OF_KERATINOCYTE_PROLIFERATION		26	0.629402	1.73833	0.00511073	0.0350581	1	972	tags=42%, list=8%, signal=46%
GOMF_CORECEPTOR_ACTIVITY	GOMF_CORECEPTOR_ACTIVITY		38	0.574491	1.73802	0.00476191	0.035086	1	2760	tags=58%, list=23%, signal=75%
GOBP_AORTA_DEVELOPMENT	GOBP_AORTA_DEVELOPMENT		47	0.55688	1.73703	0.00314961	0.0353698	1	2472	tags=57%, list=21%, signal=72%
GSE43955_TH0_VS_TGFB_IL6_IL23_TH17_ACT_CD4_TCELL_60H_UP	GSE43955_TH0_VS_TGFB_IL6_IL23_TH17_ACT_CD4_TCELL_60H_UP		154	0.468869	1.73654	0.0014245	0.0354789	1	1043	tags=19%, list=9%, signal=21%
GOBP_RESPONSE_TO_ALCOHOL	GOBP_RESPONSE_TO_ALCOHOL		153	0.464026	1.7352	0	0.0358687	1	1582	tags=27%, list=13%, signal=31%
GSE37605_C57BL6_VS_NOD_FOXP3_FUSION_GFP_TREG_UP	GSE37605_C57BL6_VS_NOD_FOXP3_FUSION_GFP_TREG_UP		39	0.574508	1.7349	0.00505051	0.0359065	1	763	tags=28%, list=6%, signal=30%
HP_MATERNAL_DIABETES	HP_MATERNAL_DIABETES		17	0.687167	1.73489	0.0101868	0.0358464	1	1922	tags=71%, list=16%, signal=84%
GOBP_PROTEIN_KINASE_B_SIGNALING	GOBP_PROTEIN_KINASE_B_SIGNALING		185	0.455133	1.73489	0	0.0357898	1	2672	tags=44%, list=23%, signal=56%
GSE15324_ELF4_KO_VS_WT_NAIVE_CD8_TCELL_DN	GSE15324_ELF4_KO_VS_WT_NAIVE_CD8_TCELL_DN		112	0.484127	1.73412	0	0.035977	1	1656	tags=43%, list=14%, signal=49%
GSE26290_CTRL_VS_AKT_INHIBITOR_TREATED_ANTI_CD3_AND_IL2_STIM_CD8_TCELL_UP	GSE26290_CTRL_VS_AKT_INHIBITOR_TREATED_ANTI_CD3_AND_IL2_STIM_CD8_TCELL_UP		129	0.470682	1.73382	0	0.0360176	1	1827	tags=29%, list=15%, signal=34%
GOBP_SOMITOGENESIS	GOBP_SOMITOGENESIS		43	0.568136	1.73361	0.0046875	0.036019	1	1291	tags=35%, list=11%, signal=39%
GOBP_EMBRYONIC_ORGAN_MORPHOGENESIS	GOBP_EMBRYONIC_ORGAN_MORPHOGENESIS		174	0.461816	1.73321	0	0.0360883	1	2024	tags=36%, list=17%, signal=42%
GOBP_EXOCRINE_SYSTEM_DEVELOPMENT	GOBP_EXOCRINE_SYSTEM_DEVELOPMENT		26	0.619351	1.7332	0.00342466	0.0360301	1	1352	tags=38%, list=11%, signal=43%
GOMF_CHEMOATTRACTANT_ACTIVITY	GOMF_CHEMOATTRACTANT_ACTIVITY		19	0.670484	1.7321	0.00875657	0.0364183	1	2657	tags=63%, list=22%, signal=81%
HP_JUVENILE_ASEPTIC_NECROSIS	HP_JUVENILE_ASEPTIC_NECROSIS		25	0.637003	1.73165	0.00171527	0.0364836	1	1005	tags=32%, list=9%, signal=35%
GSE17721_PAM3CSK4_VS_GADIQUIMOD_1H_BMDC_UP	GSE17721_PAM3CSK4_VS_GADIQUIMOD_1H_BMDC_UP		141	0.468882	1.73122	0	0.036579	1	1189	tags=23%, list=10%, signal=25%
GOBP_CELL_JUNCTION_ORGANIZATION	GOBP_CELL_JUNCTION_ORGANIZATION		476	0.415002	1.73082	0	0.0366999	1	2431	tags=38%, list=21%, signal=45%
GOMF_NOTCH_BINDING	GOMF_NOTCH_BINDING		21	0.655611	1.73078	0.0085034	0.036646	1	1638	tags=48%, list=14%, signal=55%
GSE37533_UNTREATED_VS_PIOGLIZATONE_TREATED_CD4_TCELL_PPARG2_AND_FOXP3_TRASDUCED_UP	GSE37533_UNTREATED_VS_PIOGLIZATONE_TREATED_CD4_TCELL_PPARG2_AND_FOXP3_TRASDUCED_UP		104	0.490689	1.73068	0	0.0366401	1	2140	tags=37%, list=18%, signal=44%
GOMF_ENDOPEPTIDASE_REGULATOR_ACTIVITY	GOMF_ENDOPEPTIDASE_REGULATOR_ACTIVITY		88	0.503468	1.73056	0	0.0366184	1	1052	tags=27%, list=9%, signal=30%
GOBP_CELL_CHEMOTAXIS	GOBP_CELL_CHEMOTAXIS		220	0.44438	1.73025	0	0.0366937	1	1696	tags=32%, list=14%, signal=37%
GOMF_CYTOKINE_BINDING	GOMF_CYTOKINE_BINDING		104	0.494892	1.73024	0	0.0366339	1	1395	tags=35%, list=12%, signal=39%
GOBP_CELL_SURFACE_RECEPTOR_SIGNALING_PATHWAY_INVOLVED_IN_CELL_CELL_SIGNALING	GOBP_CELL_SURFACE_RECEPTOR_SIGNALING_PATHWAY_INVOLVED_IN_CELL_CELL_SIGNALING		436	0.419227	1.73	0	0.0366565	1	1569	tags=24%, list=13%, signal=27%
GSE2405_0H_VS_3H_A_PHAGOCYTOPHILUM_STIM_NEUTROPHIL_DN	GSE2405_0H_VS_3H_A_PHAGOCYTOPHILUM_STIM_NEUTROPHIL_DN		93	0.495726	1.72946	0	0.0368341	1	1124	tags=29%, list=10%, signal=32%
GOBP_NEGATIVE_REGULATION_OF_CHEMOKINE_PRODUCTION	GOBP_NEGATIVE_REGULATION_OF_CHEMOKINE_PRODUCTION		16	0.693666	1.72939	0.0104712	0.0368059	1	646	tags=38%, list=5%, signal=40%
GOBP_RESPONSE_TO_FIBROBLAST_GROWTH_FACTOR	GOBP_RESPONSE_TO_FIBROBLAST_GROWTH_FACTOR		97	0.49815	1.72867	0.00142248	0.0370158	1	1117	tags=26%, list=9%, signal=28%
GSE34006_WT_VS_A2AR_KO_TREG_UP	GSE34006_WT_VS_A2AR_KO_TREG_UP		149	0.463411	1.72781	0.0013587	0.0372802	1	2035	tags=32%, list=17%, signal=38%
GSE2405_0H_VS_3H_A_PHAGOCYTOPHILUM_STIM_NEUTROPHIL_UP	GSE2405_0H_VS_3H_A_PHAGOCYTOPHILUM_STIM_NEUTROPHIL_UP		158	0.459129	1.72769	0	0.0372656	1	2155	tags=47%, list=18%, signal=57%
HP_ABNORMAL_MENINGEAL_MORPHOLOGY	HP_ABNORMAL_MENINGEAL_MORPHOLOGY		94	0.497095	1.72721	0	0.037381	1	1320	tags=30%, list=11%, signal=33%
PRC2_EZH2_UP.V1_UP	PRC2_EZH2_UP.V1_UP		141	0.462074	1.7267	0	0.0375183	1	1637	tags=35%, list=14%, signal=40%
GOBP_EMBRYONIC_PLACENTA_DEVELOPMENT	GOBP_EMBRYONIC_PLACENTA_DEVELOPMENT		54	0.544761	1.72635	0.00160256	0.0376002	1	1883	tags=37%, list=16%, signal=44%
GOBP_REGULATION_OF_LEUKOCYTE_ADHESION_TO_VASCULAR_ENDOTHELIAL_CELL	GOBP_REGULATION_OF_LEUKOCYTE_ADHESION_TO_VASCULAR_ENDOTHELIAL_CELL		23	0.635131	1.72605	0.0105263	0.0376664	1	1603	tags=43%, list=14%, signal=50%
GSE2706_UNSTIM_VS_2H_R848_DC_DN	GSE2706_UNSTIM_VS_2H_R848_DC_DN		141	0.472735	1.72545	0	0.0378258	1	1973	tags=33%, list=17%, signal=39%
GOBP_NEGATIVE_REGULATION_OF_EPITHELIAL_CELL_APOPTOTIC_PROCESS	GOBP_NEGATIVE_REGULATION_OF_EPITHELIAL_CELL_APOPTOTIC_PROCESS		34	0.584698	1.72393	0.00680272	0.0383564	1	1760	tags=41%, list=15%, signal=48%
GOBP_EPITHELIAL_TUBE_MORPHOGENESIS	GOBP_EPITHELIAL_TUBE_MORPHOGENESIS		219	0.441631	1.72373	0	0.0383602	1	1957	tags=37%, list=17%, signal=43%
HP_ABNORMAL_ORAL_FRENULUM_MORPHOLOGY	HP_ABNORMAL_ORAL_FRENULUM_MORPHOLOGY		40	0.565905	1.7236	0.00493421	0.0383393	1	2329	tags=43%, list=20%, signal=53%
HP_SCARRING	HP_SCARRING		107	0.480059	1.72234	0.00145985	0.0387755	1	1415	tags=22%, list=12%, signal=25%
HALLMARK_COMPLEMENT	HALLMARK_COMPLEMENT		157	0.458329	1.72227	0	0.0387339	1	1733	tags=27%, list=15%, signal=32%
GOBP_NEGATIVE_REGULATION_OF_STRIATED_MUSCLE_CELL_DIFFERENTIATION	GOBP_NEGATIVE_REGULATION_OF_STRIATED_MUSCLE_CELL_DIFFERENTIATION		24	0.63346	1.72206	0.00674536	0.0387341	1	2847	tags=58%, list=24%, signal=77%
KRAS.KIDNEY_UP.V1_DN	KRAS.KIDNEY_UP.V1_DN		54	0.54732	1.72185	0.00321027	0.038762	1	1819	tags=43%, list=15%, signal=50%
GOBP_POSITIVE_REGULATION_OF_PEPTIDYL_TYROSINE_PHOSPHORYLATION	GOBP_POSITIVE_REGULATION_OF_PEPTIDYL_TYROSINE_PHOSPHORYLATION		132	0.473173	1.72098	0	0.0390544	1	2017	tags=32%, list=17%, signal=38%
HP_HYPOVENTILATION	HP_HYPOVENTILATION		28	0.606648	1.72096	0.00857633	0.0389958	1	3143	tags=57%, list=27%, signal=78%
GOBP_CELLULAR_RESPONSE_TO_VITAMIN	GOBP_CELLULAR_RESPONSE_TO_VITAMIN		22	0.658801	1.72084	0.00880282	0.0389817	1	1416	tags=45%, list=12%, signal=52%
GSE18148_CBFB_KO_VS_WT_TREG_UP	GSE18148_CBFB_KO_VS_WT_TREG_UP		115	0.479588	1.72081	0.00152207	0.0389325	1	1650	tags=26%, list=14%, signal=30%
HP_FEMORAL_HERNIA	HP_FEMORAL_HERNIA		17	0.677085	1.72078	0.0133779	0.0388896	1	1005	tags=41%, list=9%, signal=45%
GSE22443_NAIVE_VS_ACT_AND_IL2_TREATED_CD8_TCELL_DN	GSE22443_NAIVE_VS_ACT_AND_IL2_TREATED_CD8_TCELL_DN		133	0.46917	1.72051	0	0.0389246	1	1327	tags=30%, list=11%, signal=33%
HP_OROMOTOR_APRAXIA	HP_OROMOTOR_APRAXIA		19	0.658811	1.72047	0.0120275	0.0388758	1	1148	tags=47%, list=10%, signal=52%
GOBP_CARDIAC_CHAMBER_DEVELOPMENT	GOBP_CARDIAC_CHAMBER_DEVELOPMENT		108	0.481262	1.71954	0	0.0392241	1	1875	tags=35%, list=16%, signal=41%
GSE29618_MONOCYTE_VS_PDC_UP	GSE29618_MONOCYTE_VS_PDC_UP		161	0.460361	1.71954	0	0.0391612	1	1928	tags=32%, list=16%, signal=37%
GOBP_NEGATIVE_REGULATION_OF_LEUKOCYTE_MIGRATION	GOBP_NEGATIVE_REGULATION_OF_LEUKOCYTE_MIGRATION		32	0.608364	1.71895	0.00488599	0.0393457	1	1858	tags=47%, list=16%, signal=55%
KRAS.DF.V1_DN	KRAS.DF.V1_DN		119	0.479729	1.71893	0.00149477	0.039301	1	1814	tags=29%, list=15%, signal=34%
KEGG_CYTOKINE_CYTOKINE_RECEPTOR_INTERACTION	KEGG_CYTOKINE_CYTOKINE_RECEPTOR_INTERACTION		164	0.45886	1.71869	0	0.0393516	1	1942	tags=37%, list=16%, signal=43%
GOBP_REGULATION_OF_OSTEOBLAST_DIFFERENTIATION	GOBP_REGULATION_OF_OSTEOBLAST_DIFFERENTIATION		95	0.486328	1.71839	0.00149031	0.0393916	1	2039	tags=42%, list=17%, signal=50%
GOBP_NEGATIVE_REGULATION_OF_NUCLEOTIDE_METABOLIC_PROCESS	GOBP_NEGATIVE_REGULATION_OF_NUCLEOTIDE_METABOLIC_PROCESS		15	0.690052	1.71761	0.0126812	0.0396607	1	2809	tags=73%, list=24%, signal=96%
GSE29949_CD8_POS_DC_SPLEEN_VS_DC_BRAIN_DN	GSE29949_CD8_POS_DC_SPLEEN_VS_DC_BRAIN_DN		112	0.481379	1.71703	0	0.0398247	1	1826	tags=34%, list=15%, signal=40%
GSE32533_WT_VS_MIR17_KO_ACT_CD4_TCELL_UP	GSE32533_WT_VS_MIR17_KO_ACT_CD4_TCELL_UP		155	0.4594	1.71621	0	0.0401084	1	2005	tags=32%, list=17%, signal=38%
GOBP_POSITIVE_REGULATION_OF_REACTIVE_OXYGEN_SPECIES_METABOLIC_PROCESS	GOBP_POSITIVE_REGULATION_OF_REACTIVE_OXYGEN_SPECIES_METABOLIC_PROCESS		71	0.50277	1.71603	0.00322061	0.0401198	1	1933	tags=37%, list=16%, signal=44%
GOBP_MUSCLE_FILAMENT_SLIDING	GOBP_MUSCLE_FILAMENT_SLIDING		18	0.674503	1.71554	0.0088968	0.040269	1	1261	tags=44%, list=11%, signal=50%
GSE19888_ADENOSINE_A3R_ACT_VS_TCELL_MEMBRANES_ACT_IN_MAST_CELL_UP	GSE19888_ADENOSINE_A3R_ACT_VS_TCELL_MEMBRANES_ACT_IN_MAST_CELL_UP		162	0.458956	1.71543	0	0.0402459	1	2057	tags=31%, list=17%, signal=38%
GOBP_ANTERIOR_POSTERIOR_PATTERN_SPECIFICATION	GOBP_ANTERIOR_POSTERIOR_PATTERN_SPECIFICATION		117	0.478056	1.71528	0	0.0402317	1	1703	tags=35%, list=14%, signal=41%
GOMF_ALPHA_ACTININ_BINDING	GOMF_ALPHA_ACTININ_BINDING		18	0.669457	1.71486	0.0139373	0.0403621	1	1768	tags=50%, list=15%, signal=59%
GOBP_RESPONSE_TO_CORTICOSTEROID	GOBP_RESPONSE_TO_CORTICOSTEROID		104	0.486085	1.71314	0.00439239	0.0410099	1	1933	tags=35%, list=16%, signal=41%
GOBP_MULTICELLULAR_ORGANISMAL_MOVEMENT	GOBP_MULTICELLULAR_ORGANISMAL_MOVEMENT		31	0.591202	1.71271	0.00481541	0.0411311	1	1774	tags=32%, list=15%, signal=38%
GOBP_CARDIAC_MUSCLE_CELL_PROLIFERATION	GOBP_CARDIAC_MUSCLE_CELL_PROLIFERATION		34	0.579535	1.7127	0.0032	0.0410698	1	1596	tags=41%, list=14%, signal=47%
GOBP_RECEPTOR_INTERNALIZATION	GOBP_RECEPTOR_INTERNALIZATION		72	0.509915	1.71264	0.00447761	0.0410263	1	2194	tags=36%, list=19%, signal=44%
GSE20500_CTRL_VS_RETINOIC_ACID_TREATED_CD4_TCELL_DN	GSE20500_CTRL_VS_RETINOIC_ACID_TREATED_CD4_TCELL_DN		139	0.466125	1.71243	0.00136426	0.041045	1	2008	tags=29%, list=17%, signal=34%
HP_BRUISING_SUSCEPTIBILITY	HP_BRUISING_SUSCEPTIBILITY		112	0.476137	1.71239	0.00148588	0.0409988	1	1791	tags=33%, list=15%, signal=39%
HP_ABNORMALITY_OF_THE_RIBS	HP_ABNORMALITY_OF_THE_RIBS		201	0.446055	1.71229	0	0.0409865	1	1775	tags=29%, list=15%, signal=33%
GOBP_MUSCLE_SYSTEM_PROCESS	GOBP_MUSCLE_SYSTEM_PROCESS		279	0.427623	1.71204	0	0.0410184	1	2003	tags=31%, list=17%, signal=37%
GSE19825_NAIVE_VS_DAY3_EFF_CD8_TCELL_UP	GSE19825_NAIVE_VS_DAY3_EFF_CD8_TCELL_UP		98	0.494071	1.71157	0.00147929	0.0411311	1	1246	tags=36%, list=11%, signal=40%
GOBP_REGULATION_OF_PEPTIDASE_ACTIVITY	GOBP_REGULATION_OF_PEPTIDASE_ACTIVITY		267	0.43209	1.71143	0	0.041129	1	1842	tags=27%, list=16%, signal=31%
GOBP_ARTERY_MORPHOGENESIS	GOBP_ARTERY_MORPHOGENESIS		50	0.54439	1.7114	0	0.041083	1	2499	tags=58%, list=21%, signal=73%
GSE41867_DAY6_VS_DAY15_LCMV_CLONE13_EFFECTOR_CD8_TCELL_UP	GSE41867_DAY6_VS_DAY15_LCMV_CLONE13_EFFECTOR_CD8_TCELL_UP		64	0.522612	1.71138	0.00471698	0.0410283	1	2153	tags=45%, list=18%, signal=55%
GOBP_C21_STEROID_HORMONE_BIOSYNTHETIC_PROCESS	GOBP_C21_STEROID_HORMONE_BIOSYNTHETIC_PROCESS		17	0.684698	1.71121	0.0108108	0.0410615	1	2261	tags=59%, list=19%, signal=73%
GSE5589_WT_VS_IL6_KO_LPS_AND_IL6_STIM_MACROPHAGE_45MIN_DN	GSE5589_WT_VS_IL6_KO_LPS_AND_IL6_STIM_MACROPHAGE_45MIN_DN		165	0.454697	1.71116	0	0.0410202	1	2176	tags=33%, list=18%, signal=40%
HP_ABNORMAL_CARDIAC_VENTRICULAR_FUNCTION	HP_ABNORMAL_CARDIAC_VENTRICULAR_FUNCTION		69	0.511657	1.71101	0.00473934	0.0410111	1	1235	tags=29%, list=10%, signal=32%
GOBP_REGULATION_OF_ORGAN_GROWTH	GOBP_REGULATION_OF_ORGAN_GROWTH		65	0.521041	1.71087	0	0.0409975	1	2809	tags=49%, list=24%, signal=64%
GOBP_POSITIVE_REGULATION_OF_CANONICAL_WNT_SIGNALING_PATHWAY	GOBP_POSITIVE_REGULATION_OF_CANONICAL_WNT_SIGNALING_PATHWAY		119	0.468455	1.71031	0.001443	0.0411438	1	1162	tags=20%, list=10%, signal=22%
GOBP_NEGATIVE_REGULATION_OF_INTERLEUKIN_8_PRODUCTION	GOBP_NEGATIVE_REGULATION_OF_INTERLEUKIN_8_PRODUCTION		17	0.679829	1.71027	0.0199005	0.0410968	1	1682	tags=41%, list=14%, signal=48%
SCHERER_PBMC_APSV_WETVAX_AGE_18_32YO_2_TO_4DY_UP	SCHERER_PBMC_APSV_WETVAX_AGE_18_32YO_2_TO_4DY_UP		49	0.548568	1.70918	0.00316456	0.041516	1	1626	tags=29%, list=14%, signal=33%
GOBP_EMBRYO_DEVELOPMENT_ENDING_IN_BIRTH_OR_EGG_HATCHING	GOBP_EMBRYO_DEVELOPMENT_ENDING_IN_BIRTH_OR_EGG_HATCHING		437	0.41254	1.70903	0	0.0415061	1	1922	tags=27%, list=16%, signal=31%
HP_ABSENT_TOE	HP_ABSENT_TOE		68	0.51698	1.7086	0.00311526	0.0416391	1	1756	tags=29%, list=15%, signal=34%
GOBP_APOPTOTIC_PROCESS_INVOLVED_IN_MORPHOGENESIS	GOBP_APOPTOTIC_PROCESS_INVOLVED_IN_MORPHOGENESIS		19	0.649141	1.70839	0.010582	0.0416623	1	1519	tags=53%, list=13%, signal=60%
GSE9988_LOW_LPS_VS_VEHICLE_TREATED_MONOCYTE_UP	GSE9988_LOW_LPS_VS_VEHICLE_TREATED_MONOCYTE_UP		142	0.462158	1.70799	0	0.0417543	1	866	tags=18%, list=7%, signal=20%
GSE17721_CTRL_VS_PAM3CSK4_0.5H_BMDC_DN	GSE17721_CTRL_VS_PAM3CSK4_0.5H_BMDC_DN		135	0.46222	1.70741	0	0.041954	1	1047	tags=18%, list=9%, signal=19%
HP_LOWER_EXTREMITY_JOINT_DISLOCATION	HP_LOWER_EXTREMITY_JOINT_DISLOCATION		218	0.440649	1.70629	0	0.042352	1	2007	tags=31%, list=17%, signal=36%
GOBP_PEPTIDE_CROSS_LINKING	GOBP_PEPTIDE_CROSS_LINKING		19	0.670559	1.70588	0.00715563	0.0424842	1	1132	tags=58%, list=10%, signal=64%
HP_ABNORMAL_VERTEBRAL_MORPHOLOGY	HP_ABNORMAL_VERTEBRAL_MORPHOLOGY		308	0.423706	1.70572	0	0.0424944	1	1791	tags=27%, list=15%, signal=31%
HOEK_B_CELL_2011_2012_TIV_ADULT_3DY_UP	HOEK_B_CELL_2011_2012_TIV_ADULT_3DY_UP		24	0.626211	1.70557	0.00844595	0.0424875	1	928	tags=25%, list=8%, signal=27%
GOBP_NEGATIVE_REGULATION_OF_PROTEOLYSIS	GOBP_NEGATIVE_REGULATION_OF_PROTEOLYSIS		197	0.442557	1.70546	0.00138313	0.0424664	1	1052	tags=21%, list=9%, signal=22%
KRAS.LUNG_UP.V1_DN	KRAS.LUNG_UP.V1_DN		68	0.513886	1.7049	0.00152905	0.0426645	1	1094	tags=26%, list=9%, signal=29%
GSE19888_CTRL_VS_A3R_ACTIVATION_MAST_CELL_DN	GSE19888_CTRL_VS_A3R_ACTIVATION_MAST_CELL_DN		97	0.484333	1.70478	0.00144718	0.0426403	1	2060	tags=39%, list=17%, signal=47%
GOBP_REGULATION_OF_ANIMAL_ORGAN_FORMATION	GOBP_REGULATION_OF_ANIMAL_ORGAN_FORMATION		15	0.691813	1.70453	0.00896057	0.0426744	1	2547	tags=67%, list=22%, signal=85%
GOBP_DIGESTIVE_SYSTEM_DEVELOPMENT	GOBP_DIGESTIVE_SYSTEM_DEVELOPMENT		84	0.492294	1.70448	0.00295858	0.0426376	1	1273	tags=27%, list=11%, signal=30%
GOBP_REGULATION_OF_LEUKOCYTE_CHEMOTAXIS	GOBP_REGULATION_OF_LEUKOCYTE_CHEMOTAXIS		90	0.491806	1.70443	0.0029985	0.0425894	1	803	tags=21%, list=7%, signal=22%
GOBP_POSITIVE_REGULATION_OF_MUSCLE_CONTRACTION	GOBP_POSITIVE_REGULATION_OF_MUSCLE_CONTRACTION		21	0.632572	1.70433	0.0137694	0.0425741	1	1727	tags=48%, list=15%, signal=56%
GSE43955_1H_VS_60H_ACT_CD4_TCELL_WITH_TGFB_IL6_DN	GSE43955_1H_VS_60H_ACT_CD4_TCELL_WITH_TGFB_IL6_DN		150	0.462517	1.704	0.00143472	0.0426573	1	1779	tags=32%, list=15%, signal=37%
GOBP_NEGATIVE_REGULATION_OF_CATION_CHANNEL_ACTIVITY	GOBP_NEGATIVE_REGULATION_OF_CATION_CHANNEL_ACTIVITY		24	0.621742	1.7035	0.00516351	0.0428332	1	1574	tags=38%, list=13%, signal=43%
GOBP_NEGATIVE_REGULATION_OF_EPITHELIAL_CELL_PROLIFERATION	GOBP_NEGATIVE_REGULATION_OF_EPITHELIAL_CELL_PROLIFERATION		87	0.495413	1.70346	0.00295858	0.0427823	1	1958	tags=36%, list=17%, signal=42%
GOBP_EMBRYONIC_SKELETAL_SYSTEM_MORPHOGENESIS	GOBP_EMBRYONIC_SKELETAL_SYSTEM_MORPHOGENESIS		57	0.525446	1.70295	0.00913242	0.0429043	1	2517	tags=47%, list=21%, signal=60%
GOMF_METALLOPEPTIDASE_ACTIVITY	GOMF_METALLOPEPTIDASE_ACTIVITY		131	0.464445	1.70244	0	0.0430625	1	1741	tags=33%, list=15%, signal=38%
GOBP_PATTERN_SPECIFICATION_PROCESS	GOBP_PATTERN_SPECIFICATION_PROCESS		256	0.431039	1.70163	0	0.0433239	1	1828	tags=34%, list=15%, signal=39%
SNF5_DN.V1_UP	SNF5_DN.V1_UP		137	0.460137	1.70122	0.00137741	0.0434362	1	1107	tags=17%, list=9%, signal=18%
GOBP_REGULATION_OF_OSTEOCLAST_DIFFERENTIATION	GOBP_REGULATION_OF_OSTEOCLAST_DIFFERENTIATION		44	0.542256	1.70098	0.00165563	0.0435007	1	906	tags=23%, list=8%, signal=25%
HP_FACIAL_EDEMA	HP_FACIAL_EDEMA		53	0.526517	1.70039	0.00813008	0.0436612	1	1782	tags=38%, list=15%, signal=44%
GSE1432_1H_VS_24H_IFNG_MICROGLIA_UP	GSE1432_1H_VS_24H_IFNG_MICROGLIA_UP		167	0.44964	1.70007	0	0.0437278	1	2167	tags=34%, list=18%, signal=40%
GOBP_POSITIVE_REGULATION_OF_BONE_RESORPTION	GOBP_POSITIVE_REGULATION_OF_BONE_RESORPTION		15	0.6957	1.70003	0.0142349	0.0436776	1	879	tags=33%, list=7%, signal=36%
GOBP_POSITIVE_REGULATION_OF_COLLAGEN_METABOLIC_PROCESS	GOBP_POSITIVE_REGULATION_OF_COLLAGEN_METABOLIC_PROCESS		18	0.659047	1.69974	0.0160142	0.0437414	1	2602	tags=56%, list=22%, signal=71%
GOBP_POSITIVE_REGULATION_OF_PEPTIDE_SECRETION	GOBP_POSITIVE_REGULATION_OF_PEPTIDE_SECRETION		91	0.497575	1.69913	0.0015361	0.0439324	1	1958	tags=33%, list=17%, signal=39%
HP_VARICOSE_VEINS	HP_VARICOSE_VEINS		24	0.629862	1.69902	0.0210158	0.0439278	1	1967	tags=46%, list=17%, signal=55%
GSE360_CTRL_VS_L_MAJOR_DC_DN	GSE360_CTRL_VS_L_MAJOR_DC_DN		147	0.459027	1.69892	0	0.0439053	1	1362	tags=23%, list=12%, signal=26%
GSE19888_ADENOSINE_A3R_INH_VS_ACT_WITH_INHIBITOR_PRETREATMENT_IN_MAST_CELL_DN	GSE19888_ADENOSINE_A3R_INH_VS_ACT_WITH_INHIBITOR_PRETREATMENT_IN_MAST_CELL_DN		127	0.469809	1.69879	0	0.0438952	1	2573	tags=41%, list=22%, signal=52%
GSE13411_SWITCHED_MEMORY_BCELL_VS_PLASMA_CELL_DN	GSE13411_SWITCHED_MEMORY_BCELL_VS_PLASMA_CELL_DN		126	0.464748	1.69852	0.00144509	0.0439442	1	1572	tags=24%, list=13%, signal=27%
GSE34156_UNTREATED_VS_24H_NOD2_AND_TLR1_TLR2_LIGAND_TREATED_MONOCYTE_DN	GSE34156_UNTREATED_VS_24H_NOD2_AND_TLR1_TLR2_LIGAND_TREATED_MONOCYTE_DN		76	0.499665	1.69842	0.00155763	0.0439203	1	2163	tags=36%, list=18%, signal=43%
GOBP_MYOBLAST_FUSION	GOBP_MYOBLAST_FUSION		26	0.604632	1.69783	0.017331	0.0440873	1	2658	tags=58%, list=23%, signal=74%
HP_ABNORMAL_FORM_OF_THE_VERTEBRAL_BODIES	HP_ABNORMAL_FORM_OF_THE_VERTEBRAL_BODIES		241	0.429683	1.6976	0	0.0441099	1	2218	tags=32%, list=19%, signal=39%
HP_THROMBOEMBOLISM	HP_THROMBOEMBOLISM		17	0.656764	1.69739	0.0171233	0.0441461	1	1967	tags=53%, list=17%, signal=63%
GOBP_APPENDAGE_MORPHOGENESIS	GOBP_APPENDAGE_MORPHOGENESIS		90	0.493779	1.69697	0.00146843	0.044256	1	1651	tags=33%, list=14%, signal=38%
GOBP_BASEMENT_MEMBRANE_ORGANIZATION	GOBP_BASEMENT_MEMBRANE_ORGANIZATION		26	0.609727	1.69675	0.00806452	0.0442932	1	1846	tags=62%, list=16%, signal=73%
GOMF_ENDOPEPTIDASE_ACTIVITY	GOMF_ENDOPEPTIDASE_ACTIVITY		242	0.434546	1.69619	0	0.044445	1	1786	tags=28%, list=15%, signal=32%
HP_ABNORMALITY_OF_THE_RADIAL_HEAD	HP_ABNORMALITY_OF_THE_RADIAL_HEAD		30	0.598167	1.69586	0.00844595	0.0445078	1	1518	tags=37%, list=13%, signal=42%
GOBP_ENDOCYTOSIS	GOBP_ENDOCYTOSIS		425	0.412777	1.69545	0	0.0446274	1	1639	tags=24%, list=14%, signal=26%
GOBP_LUNG_MORPHOGENESIS	GOBP_LUNG_MORPHOGENESIS		33	0.564483	1.69511	0.0152027	0.0447236	1	2643	tags=39%, list=22%, signal=51%
GOBP_REGULATION_OF_BROWN_FAT_CELL_DIFFERENTIATION	GOBP_REGULATION_OF_BROWN_FAT_CELL_DIFFERENTIATION		16	0.676482	1.6951	0.0123675	0.0446637	1	601	tags=31%, list=5%, signal=33%
HP_SUBCUTANEOUS_HEMORRHAGE	HP_SUBCUTANEOUS_HEMORRHAGE		169	0.454587	1.6942	0.00139276	0.0449952	1	1791	tags=30%, list=15%, signal=34%
GSE7852_LN_VS_FAT_TCONV_DN	GSE7852_LN_VS_FAT_TCONV_DN		167	0.444801	1.69403	0.00141443	0.0450176	1	2115	tags=32%, list=18%, signal=39%
GOBP_REGULATION_OF_BONE_MINERALIZATION	GOBP_REGULATION_OF_BONE_MINERALIZATION		56	0.530056	1.69361	0.00158983	0.0451344	1	1601	tags=41%, list=14%, signal=47%
GOBP_APPENDAGE_DEVELOPMENT	GOBP_APPENDAGE_DEVELOPMENT		113	0.475578	1.69351	0	0.0451053	1	1917	tags=34%, list=16%, signal=40%
GOBP_REGULATION_OF_INFLAMMATORY_RESPONSE	GOBP_REGULATION_OF_INFLAMMATORY_RESPONSE		236	0.431777	1.69332	0	0.0451261	1	1977	tags=31%, list=17%, signal=37%
GOBP_EPIDERMAL_GROWTH_FACTOR_RECEPTOR_SIGNALING_PATHWAY	GOBP_EPIDERMAL_GROWTH_FACTOR_RECEPTOR_SIGNALING_PATHWAY		93	0.490523	1.69332	0.00456621	0.0450648	1	1933	tags=27%, list=16%, signal=32%
GOBP_RENAL_SYSTEM_VASCULATURE_DEVELOPMENT	GOBP_RENAL_SYSTEM_VASCULATURE_DEVELOPMENT		19	0.636713	1.69331	0.00353982	0.0450023	1	2852	tags=74%, list=24%, signal=97%
HP_DESCENDING_THORACIC_AORTA_ANEURYSM	HP_DESCENDING_THORACIC_AORTA_ANEURYSM		15	0.688991	1.69306	0.020979	0.0450542	1	1040	tags=33%, list=9%, signal=37%
GSE46025_WT_VS_FOXO1_KO_KLRG1_LOW_CD8_EFFECTOR_TCELL_UP	GSE46025_WT_VS_FOXO1_KO_KLRG1_LOW_CD8_EFFECTOR_TCELL_UP		118	0.464759	1.69272	0.00143885	0.0451472	1	2493	tags=30%, list=21%, signal=37%
GOBP_LIPID_EXPORT_FROM_CELL	GOBP_LIPID_EXPORT_FROM_CELL		47	0.54203	1.692	0.00480769	0.0453802	1	1060	tags=30%, list=9%, signal=33%
GSE9988_ANTI_TREM1_AND_LPS_VS_CTRL_TREATED_MONOCYTES_UP	GSE9988_ANTI_TREM1_AND_LPS_VS_CTRL_TREATED_MONOCYTES_UP		145	0.459367	1.69188	0	0.0453723	1	1895	tags=29%, list=16%, signal=34%
GOBP_POSITIVE_REGULATION_OF_SECRETION	GOBP_POSITIVE_REGULATION_OF_SECRETION		177	0.446621	1.69114	0	0.0456538	1	2000	tags=29%, list=17%, signal=35%
HP_OSTEOARTHRITIS	HP_OSTEOARTHRITIS		43	0.553695	1.69064	0.0110236	0.0457986	1	758	tags=21%, list=6%, signal=22%
GOBP_DEVELOPMENTAL_GROWTH_INVOLVED_IN_MORPHOGENESIS	GOBP_DEVELOPMENTAL_GROWTH_INVOLVED_IN_MORPHOGENESIS		169	0.444533	1.69004	0.00140647	0.0460098	1	1668	tags=30%, list=14%, signal=35%
GOBP_SMOOTH_MUSCLE_CELL_DIFFERENTIATION	GOBP_SMOOTH_MUSCLE_CELL_DIFFERENTIATION		44	0.555401	1.6881	0.0145631	0.0468453	1	1273	tags=36%, list=11%, signal=41%
HP_THORACIC_AORTIC_ANEURYSM	HP_THORACIC_AORTIC_ANEURYSM		83	0.487142	1.68789	0	0.046866	1	1366	tags=24%, list=12%, signal=27%
GOBP_HOMOTYPIC_CELL_CELL_ADHESION	GOBP_HOMOTYPIC_CELL_CELL_ADHESION		62	0.520827	1.6877	0.00769231	0.0469038	1	1738	tags=35%, list=15%, signal=41%
HP_AORTIC_ROOT_ANEURYSM	HP_AORTIC_ROOT_ANEURYSM		63	0.52446	1.68764	0.00475436	0.0468648	1	1366	tags=27%, list=12%, signal=30%
GSE16450_IMMATURE_VS_MATURE_NEURON_CELL_LINE_6H_IFNA_STIM_DN	GSE16450_IMMATURE_VS_MATURE_NEURON_CELL_LINE_6H_IFNA_STIM_DN		128	0.464782	1.68671	0.00144092	0.0472511	1	2633	tags=43%, list=22%, signal=55%
GOBP_POSITIVE_REGULATION_OF_PATHWAY_RESTRICTED_SMAD_PROTEIN_PHOSPHORYLATION	GOBP_POSITIVE_REGULATION_OF_PATHWAY_RESTRICTED_SMAD_PROTEIN_PHOSPHORYLATION		30	0.598999	1.6864	0.0130081	0.0473528	1	1778	tags=40%, list=15%, signal=47%
HP_PNEUMOTHORAX	HP_PNEUMOTHORAX		34	0.5708	1.68563	0.00988468	0.0476596	1	1047	tags=26%, list=9%, signal=29%
GOBP_REGULATION_OF_PEPTIDYL_TYROSINE_PHOSPHORYLATION	GOBP_REGULATION_OF_PEPTIDYL_TYROSINE_PHOSPHORYLATION		185	0.449392	1.68563	0.00133156	0.0475948	1	2017	tags=30%, list=17%, signal=36%
GOBP_REGULATION_OF_SMOOTHENED_SIGNALING_PATHWAY	GOBP_REGULATION_OF_SMOOTHENED_SIGNALING_PATHWAY		64	0.508358	1.68553	0.00303951	0.0475722	1	2384	tags=39%, list=20%, signal=49%
GSE13306_TREG_VS_TCONV_UP	GSE13306_TREG_VS_TCONV_UP		130	0.46125	1.68549	0	0.0475222	1	1956	tags=30%, list=17%, signal=36%
HOWARD_NEUTROPHIL_INACT_MONOV_INFLUENZA_A_INDONESIA_05_2005_H5N1_AGE_18_49YO_1DY_DN	HOWARD_NEUTROPHIL_INACT_MONOV_INFLUENZA_A_INDONESIA_05_2005_H5N1_AGE_18_49YO_1DY_DN		94	0.483166	1.68542	0.00298063	0.0474958	1	2583	tags=38%, list=22%, signal=49%
KRAS.600_UP.V1_DN	KRAS.600_UP.V1_DN		129	0.453089	1.68516	0.0057554	0.0475494	1	1811	tags=36%, list=15%, signal=43%
GOBP_NEGATIVE_REGULATION_OF_TISSUE_REMODELING	GOBP_NEGATIVE_REGULATION_OF_TISSUE_REMODELING		15	0.675995	1.68514	0.0134357	0.0474996	1	324	tags=20%, list=3%, signal=21%
HP_ABNORMALITY_OF_THE_TARSAL_BONES	HP_ABNORMALITY_OF_THE_TARSAL_BONES		76	0.500804	1.68489	0.0045045	0.0475842	1	1880	tags=28%, list=16%, signal=33%
GSE4142_NAIVE_VS_MEMORY_BCELL_UP	GSE4142_NAIVE_VS_MEMORY_BCELL_UP		119	0.466365	1.68379	0.0027972	0.0480658	1	2055	tags=31%, list=17%, signal=37%
GSE24634_TEFF_VS_TCONV_DAY7_IN_CULTURE_DN	GSE24634_TEFF_VS_TCONV_DAY7_IN_CULTURE_DN		163	0.446267	1.68377	0	0.0480116	1	3005	tags=40%, list=25%, signal=54%
GOBP_ANIMAL_ORGAN_REGENERATION	GOBP_ANIMAL_ORGAN_REGENERATION		58	0.520056	1.68361	0.00475436	0.0480133	1	2017	tags=31%, list=17%, signal=37%
GOCC_VESICLE_LUMEN	GOCC_VESICLE_LUMEN		242	0.428131	1.68328	0	0.0481044	1	1158	tags=18%, list=10%, signal=20%
GOBP_MATERNAL_PLACENTA_DEVELOPMENT	GOBP_MATERNAL_PLACENTA_DEVELOPMENT		21	0.634348	1.68242	0.0187713	0.0484698	1	2010	tags=57%, list=17%, signal=69%
GOBP_PHOSPHATIDYLINOSITOL_3_KINASE_SIGNALING	GOBP_PHOSPHATIDYLINOSITOL_3_KINASE_SIGNALING		119	0.464405	1.68197	0.001443	0.0486117	1	2591	tags=43%, list=22%, signal=54%
GOBP_GLUTAMINE_FAMILY_AMINO_ACID_METABOLIC_PROCESS	GOBP_GLUTAMINE_FAMILY_AMINO_ACID_METABOLIC_PROCESS		42	0.560117	1.68175	0.00324149	0.0486681	1	1107	tags=24%, list=9%, signal=26%
GOBP_ENDODERM_DEVELOPMENT	GOBP_ENDODERM_DEVELOPMENT		56	0.51453	1.68148	0.00306279	0.0487242	1	1806	tags=41%, list=15%, signal=48%
GSE360_L_MAJOR_VS_T_GONDII_DC_DN	GSE360_L_MAJOR_VS_T_GONDII_DC_DN		131	0.457095	1.68146	0.00449102	0.0486671	1	2193	tags=28%, list=19%, signal=34%
GOBP_REGULATION_OF_CALCIUM_ION_IMPORT	GOBP_REGULATION_OF_CALCIUM_ION_IMPORT		23	0.627431	1.6814	0.00886525	0.0486306	1	1627	tags=39%, list=14%, signal=45%
GOBP_INTEGRIN_MEDIATED_SIGNALING_PATHWAY	GOBP_INTEGRIN_MEDIATED_SIGNALING_PATHWAY		90	0.489352	1.68093	0.0045045	0.0487974	1	2194	tags=40%, list=19%, signal=49%
BCAT_BILD_ET_AL_UP	BCAT_BILD_ET_AL_UP		30	0.58989	1.68076	0.00499168	0.0488083	1	2623	tags=57%, list=22%, signal=73%
HP_ABNORMALITY_OF_PELVIC_GIRDLE_BONE_MORPHOLOGY	HP_ABNORMALITY_OF_PELVIC_GIRDLE_BONE_MORPHOLOGY		429	0.405098	1.68076	0	0.0487436	1	1884	tags=25%, list=16%, signal=28%
HP_DISPROPORTIONATE_SHORT_STATURE	HP_DISPROPORTIONATE_SHORT_STATURE		89	0.488055	1.68004	0.00153846	0.0490078	1	1518	tags=27%, list=13%, signal=31%
GSE3982_EOSINOPHIL_VS_BCELL_UP	GSE3982_EOSINOPHIL_VS_BCELL_UP		132	0.457565	1.67997	0	0.0489955	1	1424	tags=30%, list=12%, signal=33%
HP_ABNORMALITY_OF_LIMB_EPIPHYSIS_MORPHOLOGY	HP_ABNORMALITY_OF_LIMB_EPIPHYSIS_MORPHOLOGY		79	0.492622	1.67988	0.00149925	0.0489831	1	1917	tags=28%, list=16%, signal=33%
HOWARD_MONOCYTE_INACT_MONOV_INFLUENZA_A_INDONESIA_05_2005_H5N1_AGE_18_49YO_1DY_DN	HOWARD_MONOCYTE_INACT_MONOV_INFLUENZA_A_INDONESIA_05_2005_H5N1_AGE_18_49YO_1DY_DN		24	0.624652	1.67967	0.00684931	0.0490344	1	1607	tags=46%, list=14%, signal=53%
GOBP_POSITIVE_REGULATION_OF_EXTRINSIC_APOPTOTIC_SIGNALING_PATHWAY	GOBP_POSITIVE_REGULATION_OF_EXTRINSIC_APOPTOTIC_SIGNALING_PATHWAY		38	0.575034	1.67948	0.0145396	0.0490563	1	1455	tags=32%, list=12%, signal=36%
GOBP_MAINTENANCE_OF_BLOOD_BRAIN_BARRIER	GOBP_MAINTENANCE_OF_BLOOD_BRAIN_BARRIER		27	0.598897	1.67872	0.0186757	0.0493538	1	2194	tags=59%, list=19%, signal=73%
GOBP_CARBOHYDRATE_DERIVATIVE_CATABOLIC_PROCESS	GOBP_CARBOHYDRATE_DERIVATIVE_CATABOLIC_PROCESS		139	0.454821	1.67866	0.00142653	0.049317	1	1762	tags=27%, list=15%, signal=31%
GSE6269_E_COLI_VS_STAPH_AUREUS_INF_PBMC_DN	GSE6269_E_COLI_VS_STAPH_AUREUS_INF_PBMC_DN		144	0.455769	1.6785	0	0.049355	1	3334	tags=45%, list=28%, signal=62%
GOBP_NEGATIVE_REGULATION_OF_CELL_GROWTH	GOBP_NEGATIVE_REGULATION_OF_CELL_GROWTH		144	0.451307	1.67798	0.00280899	0.0495548	1	1998	tags=32%, list=17%, signal=38%
HALLMARK_IL6_JAK_STAT3_SIGNALING	HALLMARK_IL6_JAK_STAT3_SIGNALING		69	0.497856	1.67783	0.00946372	0.0495646	1	1594	tags=30%, list=13%, signal=35%
GOBP_COAGULATION	GOBP_COAGULATION		234	0.428362	1.67756	0	0.0496399	1	1331	tags=24%, list=11%, signal=26%
HP_PERICARDIAL_EFFUSION	HP_PERICARDIAL_EFFUSION		28	0.593075	1.6765	0.0103627	0.0500946	1	2014	tags=39%, list=17%, signal=47%
JAK2_DN.V1_UP	JAK2_DN.V1_UP		72	0.5033	1.67641	0.00152439	0.0500872	1	1379	tags=35%, list=12%, signal=39%
CSR_LATE_UP.V1_DN	CSR_LATE_UP.V1_DN		121	0.460498	1.6761	0.00286123	0.0501539	1	1766	tags=27%, list=15%, signal=32%
GOCC_CELL_CELL_CONTACT_ZONE	GOCC_CELL_CELL_CONTACT_ZONE		50	0.535204	1.67605	0.00637959	0.0501239	1	2425	tags=46%, list=21%, signal=58%
GOBP_MYELOID_LEUKOCYTE_MIGRATION	GOBP_MYELOID_LEUKOCYTE_MIGRATION		149	0.452281	1.67599	0	0.0500851	1	2010	tags=36%, list=17%, signal=43%
HALLMARK_ESTROGEN_RESPONSE_LATE	HALLMARK_ESTROGEN_RESPONSE_LATE		146	0.44752	1.67583	0	0.0501092	1	1497	tags=25%, list=13%, signal=29%
GOBP_REGULATION_OF_CELL_SUBSTRATE_JUNCTION_ORGANIZATION	GOBP_REGULATION_OF_CELL_SUBSTRATE_JUNCTION_ORGANIZATION		63	0.520832	1.67571	0.00473186	0.0501117	1	1944	tags=38%, list=16%, signal=45%
GOBP_RHO_PROTEIN_SIGNAL_TRANSDUCTION	GOBP_RHO_PROTEIN_SIGNAL_TRANSDUCTION		107	0.469763	1.67531	0.00298063	0.0502192	1	2406	tags=41%, list=20%, signal=51%
HP_MANDIBULAR_PROGNATHIA	HP_MANDIBULAR_PROGNATHIA		138	0.457115	1.67524	0	0.0501831	1	1689	tags=25%, list=14%, signal=28%
GOBP_MESODERM_DEVELOPMENT	GOBP_MESODERM_DEVELOPMENT		73	0.492866	1.67306	0.00916031	0.0511821	1	1329	tags=34%, list=11%, signal=38%
GOBP_REGULATION_OF_HORMONE_METABOLIC_PROCESS	GOBP_REGULATION_OF_HORMONE_METABOLIC_PROCESS		22	0.628826	1.67293	0.0084317	0.051166	1	2956	tags=64%, list=25%, signal=85%
GOBP_STRIATED_MUSCLE_CELL_DIFFERENTIATION	GOBP_STRIATED_MUSCLE_CELL_DIFFERENTIATION		175	0.438867	1.67067	0.00136799	0.0521931	1	1286	tags=23%, list=11%, signal=26%
GOCC_BASAL_PART_OF_CELL	GOCC_BASAL_PART_OF_CELL		169	0.44294	1.67046	0.00138889	0.0522092	1	2500	tags=38%, list=21%, signal=47%
GOBP_MESODERMAL_CELL_DIFFERENTIATION	GOBP_MESODERMAL_CELL_DIFFERENTIATION		19	0.648878	1.67013	0.0140105	0.0523008	1	1596	tags=53%, list=14%, signal=61%
GOBP_NEGATIVE_REGULATION_OF_EPITHELIAL_CELL_DIFFERENTIATION	GOBP_NEGATIVE_REGULATION_OF_EPITHELIAL_CELL_DIFFERENTIATION		28	0.577989	1.66976	0.0128824	0.0524145	1	1687	tags=50%, list=14%, signal=58%
HP_CHEST_PAIN	HP_CHEST_PAIN		67	0.505207	1.66963	0.00292826	0.0524227	1	1040	tags=16%, list=9%, signal=18%
GOBP_REGULATION_OF_HUMORAL_IMMUNE_RESPONSE	GOBP_REGULATION_OF_HUMORAL_IMMUNE_RESPONSE		48	0.524414	1.66822	0.00468019	0.0529911	1	511	tags=17%, list=4%, signal=17%
BRCA1_DN.V1_UP	BRCA1_DN.V1_UP		52	0.522131	1.66637	0.00950872	0.053864	1	1185	tags=29%, list=10%, signal=32%
GSE9988_ANTI_TREM1_VS_VEHICLE_TREATED_MONOCYTES_UP	GSE9988_ANTI_TREM1_VS_VEHICLE_TREATED_MONOCYTES_UP		145	0.450951	1.66562	0.001443	0.0541757	1	2113	tags=29%, list=18%, signal=35%
GOBP_GLAND_MORPHOGENESIS	GOBP_GLAND_MORPHOGENESIS		82	0.480266	1.66481	0.00757576	0.0545162	1	1519	tags=35%, list=13%, signal=40%
GSE17721_LPS_VS_GARDIQUIMOD_2H_BMDC_UP	GSE17721_LPS_VS_GARDIQUIMOD_2H_BMDC_UP		154	0.443161	1.66477	0	0.0544739	1	1665	tags=23%, list=14%, signal=27%
KRAS.BREAST_UP.V1_DN	KRAS.BREAST_UP.V1_DN		72	0.497329	1.66447	0.00306748	0.0545715	1	1960	tags=40%, list=17%, signal=48%
GSE2585_CTEC_VS_MTEC_THYMUS_DN	GSE2585_CTEC_VS_MTEC_THYMUS_DN		136	0.452436	1.66334	0	0.0550398	1	1745	tags=29%, list=15%, signal=33%
GOBP_REGULATION_OF_PEPTIDE_SECRETION	GOBP_REGULATION_OF_PEPTIDE_SECRETION		191	0.43554	1.66314	0	0.055079	1	2011	tags=30%, list=17%, signal=36%
GOBP_ODONTOGENESIS_OF_DENTIN_CONTAINING_TOOTH	GOBP_ODONTOGENESIS_OF_DENTIN_CONTAINING_TOOTH		54	0.521475	1.66307	0.00646204	0.055036	1	1077	tags=33%, list=9%, signal=37%
HP_NARROW_NASAL_BRIDGE	HP_NARROW_NASAL_BRIDGE		27	0.595358	1.66301	0.010118	0.0550005	1	1704	tags=44%, list=14%, signal=52%
GSE36392_EOSINOPHIL_VS_MAC_IL25_TREATED_LUNG_UP	GSE36392_EOSINOPHIL_VS_MAC_IL25_TREATED_LUNG_UP		107	0.465968	1.66284	0.001443	0.0550017	1	1451	tags=29%, list=12%, signal=33%
GSE39820_IL1B_IL6_VS_IL1B_IL6_IL23A_TREATED_CD4_TCELL_DN	GSE39820_IL1B_IL6_VS_IL1B_IL6_IL23A_TREATED_CD4_TCELL_DN		146	0.448923	1.66185	0	0.0554346	1	2158	tags=29%, list=18%, signal=36%
HP_DECREASED_SKULL_OSSIFICATION	HP_DECREASED_SKULL_OSSIFICATION		24	0.605162	1.66152	0.0168634	0.0555473	1	1097	tags=29%, list=9%, signal=32%
HP_APLASIA_HYPOPLASIA_INVOLVING_THE_FEMORAL_HEAD_AND_NECK	HP_APLASIA_HYPOPLASIA_INVOLVING_THE_FEMORAL_HEAD_AND_NECK		30	0.59062	1.66142	0.0183639	0.0555126	1	2125	tags=40%, list=18%, signal=49%
GOBP_REGULATION_OF_GLUCONEOGENESIS	GOBP_REGULATION_OF_GLUCONEOGENESIS		31	0.583608	1.66141	0.0150754	0.0554489	1	601	tags=16%, list=5%, signal=17%
GOBP_POSITIVE_REGULATION_OF_PHOSPHATIDYLINOSITOL_3_KINASE_SIGNALING	GOBP_POSITIVE_REGULATION_OF_PHOSPHATIDYLINOSITOL_3_KINASE_SIGNALING		71	0.497826	1.66095	0.00151745	0.0556311	1	2177	tags=44%, list=18%, signal=53%
SNF5_DN.V1_DN	SNF5_DN.V1_DN		98	0.475401	1.66066	0	0.0557234	1	2121	tags=43%, list=18%, signal=52%
GSE40666_WT_VS_STAT4_KO_CD8_TCELL_UP	GSE40666_WT_VS_STAT4_KO_CD8_TCELL_UP		75	0.490083	1.66051	0.00630915	0.0557199	1	2095	tags=44%, list=18%, signal=53%
GSE37533_UNTREATED_VS_PIOGLIZATONE_TREATED_CD4_TCELL_PPARG1_AND_FOXP3_TRASDUCED_UP	GSE37533_UNTREATED_VS_PIOGLIZATONE_TREATED_CD4_TCELL_PPARG1_AND_FOXP3_TRASDUCED_UP		171	0.439947	1.66015	0	0.0558336	1	1420	tags=21%, list=12%, signal=24%
GSE2405_HEAT_KILLED_LYSATE_VS_LIVE_A_PHAGOCYTOPHILUM_STIM_NEUTROPHIL_24H_UP	GSE2405_HEAT_KILLED_LYSATE_VS_LIVE_A_PHAGOCYTOPHILUM_STIM_NEUTROPHIL_24H_UP		168	0.435017	1.65969	0	0.0559927	1	1952	tags=33%, list=17%, signal=39%
GSE26488_CTRL_VS_PEPTIDE_INJECTION_HDAC7_DELTAP_TG_OT2_THYMOCYTE_DN	GSE26488_CTRL_VS_PEPTIDE_INJECTION_HDAC7_DELTAP_TG_OT2_THYMOCYTE_DN		167	0.442243	1.65862	0.00141643	0.056498	1	2939	tags=42%, list=25%, signal=55%
GOBP_PYRIDINE_CONTAINING_COMPOUND_BIOSYNTHETIC_PROCESS	GOBP_PYRIDINE_CONTAINING_COMPOUND_BIOSYNTHETIC_PROCESS		23	0.615751	1.65788	0.0144928	0.0567926	1	118	tags=13%, list=1%, signal=13%
GOBP_LABYRINTHINE_LAYER_DEVELOPMENT	GOBP_LABYRINTHINE_LAYER_DEVELOPMENT		30	0.577692	1.65785	0.00831947	0.0567387	1	1330	tags=33%, list=11%, signal=37%
HP_ABNORMALITY_OF_CORNEAL_THICKNESS	HP_ABNORMALITY_OF_CORNEAL_THICKNESS		66	0.499288	1.65785	0.00155521	0.0566694	1	1188	tags=20%, list=10%, signal=22%
GOBP_RESPONSE_TO_VITAMIN_D	GOBP_RESPONSE_TO_VITAMIN_D		22	0.621137	1.65784	0.0236887	0.0566062	1	1416	tags=36%, list=12%, signal=41%
GSE19198_6H_VS_24H_IL21_TREATED_TCELL_UP	GSE19198_6H_VS_24H_IL21_TREATED_TCELL_UP		153	0.448779	1.6577	0.00144092	0.0565982	1	1437	tags=22%, list=12%, signal=24%
GSE360_DC_VS_MAC_B_MALAYI_HIGH_DOSE_DN	GSE360_DC_VS_MAC_B_MALAYI_HIGH_DOSE_DN		155	0.444284	1.65759	0	0.0565794	1	2442	tags=37%, list=21%, signal=47%
GSE13306_RA_VS_UNTREATED_TCONV_UP	GSE13306_RA_VS_UNTREATED_TCONV_UP		157	0.44298	1.65752	0	0.0565404	1	1073	tags=15%, list=9%, signal=17%
GOBP_HOMOPHILIC_CELL_ADHESION_VIA_PLASMA_MEMBRANE_ADHESION_MOLECULES	GOBP_HOMOPHILIC_CELL_ADHESION_VIA_PLASMA_MEMBRANE_ADHESION_MOLECULES		70	0.498105	1.6574	0.0030581	0.0565206	1	2425	tags=54%, list=21%, signal=68%
GSE40274_CTRL_VS_FOXP3_AND_SATB1_TRANSDUCED_ACTIVATED_CD4_TCELL_DN	GSE40274_CTRL_VS_FOXP3_AND_SATB1_TRANSDUCED_ACTIVATED_CD4_TCELL_DN		97	0.475328	1.65739	0.00601504	0.0564533	1	1734	tags=31%, list=15%, signal=36%
GOBP_REGULATION_OF_STRIATED_MUSCLE_CELL_DIFFERENTIATION	GOBP_REGULATION_OF_STRIATED_MUSCLE_CELL_DIFFERENTIATION		55	0.514009	1.65735	0.00314961	0.056398	1	2847	tags=51%, list=24%, signal=67%
HP_LONG_TOE	HP_LONG_TOE		22	0.606818	1.6573	0.0193322	0.056357	1	403	tags=23%, list=3%, signal=23%
GOBP_BONE_RESORPTION	GOBP_BONE_RESORPTION		46	0.536038	1.65575	0.00770416	0.0571055	1	2043	tags=30%, list=17%, signal=37%
HP_SHORT_THORAX	HP_SHORT_THORAX		35	0.56152	1.65567	0.0219224	0.0570768	1	1974	tags=37%, list=17%, signal=44%
GSE42021_CD24HI_TREG_VS_CD24HI_TCONV_THYMUS_DN	GSE42021_CD24HI_TREG_VS_CD24HI_TCONV_THYMUS_DN		170	0.44512	1.65504	0.0013947	0.0573188	1	1818	tags=29%, list=15%, signal=34%
GSE19198_1H_VS_6H_IL21_TREATED_TCELL_DN	GSE19198_1H_VS_6H_IL21_TREATED_TCELL_DN		166	0.441787	1.65478	0	0.0573809	1	1228	tags=19%, list=10%, signal=21%
GOBP_APOPTOTIC_PROCESS_INVOLVED_IN_DEVELOPMENT	GOBP_APOPTOTIC_PROCESS_INVOLVED_IN_DEVELOPMENT		24	0.599471	1.65461	0.0228471	0.0574051	1	1519	tags=50%, list=13%, signal=57%
HP_ABNORMALITY_OF_THE_CEREBRAL_VASCULATURE	HP_ABNORMALITY_OF_THE_CEREBRAL_VASCULATURE		204	0.42881	1.65461	0.0027137	0.0573338	1	1989	tags=28%, list=17%, signal=34%
HP_VASCULAR_DILATATION	HP_VASCULAR_DILATATION		147	0.438482	1.65404	0	0.0575579	1	1941	tags=27%, list=16%, signal=31%
HP_JOINT_DISLOCATION	HP_JOINT_DISLOCATION		286	0.4154	1.65337	0	0.0578343	1	1884	tags=26%, list=16%, signal=30%
GOBP_POSITIVE_REGULATION_OF_LEUKOCYTE_MIGRATION	GOBP_POSITIVE_REGULATION_OF_LEUKOCYTE_MIGRATION		101	0.469693	1.65325	0.00283688	0.0578286	1	1627	tags=30%, list=14%, signal=34%
GSE29618_MONOCYTE_VS_MDC_DAY7_FLU_VACCINE_UP	GSE29618_MONOCYTE_VS_MDC_DAY7_FLU_VACCINE_UP		165	0.442718	1.65315	0.00140056	0.0578191	1	2190	tags=33%, list=19%, signal=40%
GOBP_NEGATIVE_REGULATION_OF_TRANSMEMBRANE_RECEPTOR_PROTEIN_SERINE_THREONINE_KINASE_SIGNALING_PATHWAY	GOBP_NEGATIVE_REGULATION_OF_TRANSMEMBRANE_RECEPTOR_PROTEIN_SERINE_THREONINE_KINASE_SIGNALING_PATHWAY		91	0.47734	1.65309	0.00285307	0.0577828	1	1643	tags=32%, list=14%, signal=37%
HP_FRAGILE_SKIN	HP_FRAGILE_SKIN		28	0.586569	1.65282	0.0154905	0.0578529	1	2329	tags=54%, list=20%, signal=67%
GOBP_REGULATION_OF_OSSIFICATION	GOBP_REGULATION_OF_OSSIFICATION		83	0.488618	1.65231	0.00295421	0.058058	1	1665	tags=37%, list=14%, signal=43%
GOBP_REGULATION_OF_NERVOUS_SYSTEM_PROCESS	GOBP_REGULATION_OF_NERVOUS_SYSTEM_PROCESS		74	0.494439	1.65224	0.00614439	0.0580228	1	2090	tags=36%, list=18%, signal=44%
GOBP_HEART_GROWTH	GOBP_HEART_GROWTH		62	0.514763	1.65224	0.00763359	0.0579562	1	1596	tags=37%, list=14%, signal=43%
HP_PALPEBRAL_EDEMA	HP_PALPEBRAL_EDEMA		30	0.584409	1.65221	0.0112903	0.0578979	1	1782	tags=40%, list=15%, signal=47%
HP_DISTAL_ARTHROGRYPOSIS	HP_DISTAL_ARTHROGRYPOSIS		15	0.656177	1.65181	0.0231729	0.0580197	1	941	tags=40%, list=8%, signal=43%
GSE19825_NAIVE_VS_IL2RALOW_DAY3_EFF_CD8_TCELL_UP	GSE19825_NAIVE_VS_IL2RALOW_DAY3_EFF_CD8_TCELL_UP		91	0.477766	1.65148	0.00765697	0.0581355	1	1933	tags=45%, list=16%, signal=53%
HOEK_NK_CELL_2011_2012_TIV_1D_VS_0DY_ADULT_1D_DN	HOEK_NK_CELL_2011_2012_TIV_1D_VS_0DY_ADULT_1D_DN		25	0.608272	1.65145	0.00830565	0.0580795	1	3047	tags=76%, list=26%, signal=102%
GSE42088_UNINF_VS_LEISHMANIA_INF_DC_8H_UP	GSE42088_UNINF_VS_LEISHMANIA_INF_DC_8H_UP		155	0.439453	1.65073	0	0.0583998	1	2652	tags=37%, list=22%, signal=48%
GSE2128_CTRL_VS_MIMETOPE_NEGATIVE_SELECTION_DP_THYMOCYTE_C57BL6_UP	GSE2128_CTRL_VS_MIMETOPE_NEGATIVE_SELECTION_DP_THYMOCYTE_C57BL6_UP		132	0.455412	1.65033	0	0.0585413	1	1634	tags=30%, list=14%, signal=34%
GSE34392_ST2_KO_VS_WT_DAY8_LCMV_EFFECTOR_CD8_TCELL_DN	GSE34392_ST2_KO_VS_WT_DAY8_LCMV_EFFECTOR_CD8_TCELL_DN		175	0.433479	1.65018	0	0.0585426	1	1559	tags=27%, list=13%, signal=30%
GOBP_KIDNEY_EPITHELIUM_DEVELOPMENT	GOBP_KIDNEY_EPITHELIUM_DEVELOPMENT		84	0.483145	1.64994	0.00303951	0.0586086	1	1687	tags=44%, list=14%, signal=51%
GSE3920_UNTREATED_VS_IFNG_TREATED_ENDOTHELIAL_CELL_UP	GSE3920_UNTREATED_VS_IFNG_TREATED_ENDOTHELIAL_CELL_UP		105	0.466777	1.64928	0.00149701	0.0588909	1	1567	tags=30%, list=13%, signal=35%
GOCC_CHLORIDE_CHANNEL_COMPLEX	GOCC_CHLORIDE_CHANNEL_COMPLEX		15	0.687069	1.64924	0.014652	0.0588378	1	467	tags=20%, list=4%, signal=21%
GOBP_KERATINOCYTE_PROLIFERATION	GOBP_KERATINOCYTE_PROLIFERATION		34	0.568021	1.64852	0.0137694	0.0591549	1	972	tags=44%, list=8%, signal=48%
GSE21546_SAP1A_KO_VS_SAP1A_KO_AND_ELK1_KO_ANTI_CD3_STIM_DP_THYMOCYTES_DN	GSE21546_SAP1A_KO_VS_SAP1A_KO_AND_ELK1_KO_ANTI_CD3_STIM_DP_THYMOCYTES_DN		168	0.432984	1.6484	0.00418994	0.0591579	1	2866	tags=38%, list=24%, signal=49%
GOBP_REGULATION_OF_PHOSPHATIDYLINOSITOL_3_KINASE_SIGNALING	GOBP_REGULATION_OF_PHOSPHATIDYLINOSITOL_3_KINASE_SIGNALING		99	0.470714	1.6476	0.00609756	0.059538	1	2177	tags=38%, list=18%, signal=47%
GSE29618_PRE_VS_DAY7_FLU_VACCINE_BCELL_UP	GSE29618_PRE_VS_DAY7_FLU_VACCINE_BCELL_UP		124	0.456585	1.64758	0.0014556	0.0594798	1	2100	tags=33%, list=18%, signal=40%
GOBP_ANGIOGENESIS_INVOLVED_IN_WOUND_HEALING	GOBP_ANGIOGENESIS_INVOLVED_IN_WOUND_HEALING		24	0.604877	1.64738	0.0152542	0.0595076	1	643	tags=29%, list=5%, signal=31%
GSE13411_NAIVE_VS_SWITCHED_MEMORY_BCELL_UP	GSE13411_NAIVE_VS_SWITCHED_MEMORY_BCELL_UP		95	0.467717	1.64649	0.00592593	0.0599269	1	1848	tags=40%, list=16%, signal=47%
GOBP_VASCULAR_ENDOTHELIAL_GROWTH_FACTOR_SIGNALING_PATHWAY	GOBP_VASCULAR_ENDOTHELIAL_GROWTH_FACTOR_SIGNALING_PATHWAY		37	0.563101	1.64637	0.01473	0.0599336	1	2656	tags=54%, list=22%, signal=70%
GOBP_DIACYLGLYCEROL_METABOLIC_PROCESS	GOBP_DIACYLGLYCEROL_METABOLIC_PROCESS		19	0.628406	1.64525	0.0136519	0.0604904	1	2519	tags=53%, list=21%, signal=67%
HP_CEREBRAL_PALSY	HP_CEREBRAL_PALSY		30	0.58078	1.64478	0.0102041	0.0606896	1	1096	tags=23%, list=9%, signal=26%
GOBP_SIGNALING_RECEPTOR_LIGAND_PRECURSOR_PROCESSING	GOBP_SIGNALING_RECEPTOR_LIGAND_PRECURSOR_PROCESSING		16	0.667514	1.64468	0.00900901	0.0606635	1	3502	tags=88%, list=30%, signal=124%
HP_OSTEOPETROSIS	HP_OSTEOPETROSIS		15	0.66578	1.64465	0.0242537	0.0606033	1	1987	tags=47%, list=17%, signal=56%
GOBP_PROXIMAL_DISTAL_PATTERN_FORMATION	GOBP_PROXIMAL_DISTAL_PATTERN_FORMATION		18	0.649454	1.64464	0.0263158	0.0605354	1	1428	tags=56%, list=12%, signal=63%
GSE22886_DAY1_VS_DAY7_MONOCYTE_IN_CULTURE_UP	GSE22886_DAY1_VS_DAY7_MONOCYTE_IN_CULTURE_UP		173	0.432817	1.6441	0	0.0607417	1	1529	tags=21%, list=13%, signal=24%
HP_ABNORMALITY_OF_UPPER_LIMB_EPIPHYSIS_MORPHOLOGY	HP_ABNORMALITY_OF_UPPER_LIMB_EPIPHYSIS_MORPHOLOGY		37	0.552739	1.64406	0.00501672	0.0606839	1	1917	tags=30%, list=16%, signal=35%
HP_EMPHYSEMA	HP_EMPHYSEMA		39	0.546978	1.64331	0.0127389	0.0610476	1	1428	tags=31%, list=12%, signal=35%
HP_CONTRACTURES_INVOLVING_THE_JOINTS_OF_THE_FEET	HP_CONTRACTURES_INVOLVING_THE_JOINTS_OF_THE_FEET		53	0.522864	1.64328	0.00946372	0.0609896	1	1837	tags=32%, list=16%, signal=38%
HP_ABNORMALITY_OF_THE_ISCHIUM	HP_ABNORMALITY_OF_THE_ISCHIUM		19	0.615441	1.64236	0.00884956	0.0615019	1	1775	tags=42%, list=15%, signal=49%
GOBP_MYOTUBE_DIFFERENTIATION	GOBP_MYOTUBE_DIFFERENTIATION		71	0.485405	1.64158	0.00312989	0.0618984	1	2431	tags=42%, list=21%, signal=53%
HP_ABNORMALITY_OF_THE_SHOULDER_GIRDLE_MUSCULATURE	HP_ABNORMALITY_OF_THE_SHOULDER_GIRDLE_MUSCULATURE		82	0.482063	1.64152	0	0.0618609	1	1822	tags=27%, list=15%, signal=32%
GOBP_PHAGOCYTOSIS_RECOGNITION	GOBP_PHAGOCYTOSIS_RECOGNITION		21	0.611448	1.64123	0.0118644	0.061974	1	558	tags=38%, list=5%, signal=40%
KEGG_PATHWAYS_IN_CANCER	KEGG_PATHWAYS_IN_CANCER		259	0.41833	1.64094	0	0.0620612	1	2546	tags=38%, list=22%, signal=48%
GOBP_NEGATIVE_REGULATION_OF_SMALL_MOLECULE_METABOLIC_PROCESS	GOBP_NEGATIVE_REGULATION_OF_SMALL_MOLECULE_METABOLIC_PROCESS		60	0.501256	1.64075	0.00783699	0.0620908	1	2668	tags=38%, list=23%, signal=49%
GSE28737_BCL6_HET_VS_BCL6_KO_FOLLICULAR_BCELL_DN	GSE28737_BCL6_HET_VS_BCL6_KO_FOLLICULAR_BCELL_DN		162	0.438956	1.64074	0	0.0620219	1	1077	tags=18%, list=9%, signal=19%
HP_ECCHYMOSIS	HP_ECCHYMOSIS		34	0.568853	1.64056	0.00978793	0.0620416	1	793	tags=24%, list=7%, signal=25%
GSE360_HIGH_DOSE_B_MALAYI_VS_M_TUBERCULOSIS_MAC_DN	GSE360_HIGH_DOSE_B_MALAYI_VS_M_TUBERCULOSIS_MAC_DN		155	0.439673	1.6404	0.00139665	0.062069	1	1615	tags=23%, list=14%, signal=27%
GSE17721_CTRL_VS_LPS_1H_BMDC_DN	GSE17721_CTRL_VS_LPS_1H_BMDC_DN		147	0.439453	1.64029	0.00140647	0.0620484	1	1886	tags=29%, list=16%, signal=34%
HP_ABNORMALITY_OF_PULMONARY_CIRCULATION	HP_ABNORMALITY_OF_PULMONARY_CIRCULATION		115	0.455765	1.64015	0.00426136	0.0620635	1	1987	tags=30%, list=17%, signal=36%
GOBP_REGULATION_OF_VASCULAR_ENDOTHELIAL_GROWTH_FACTOR_RECEPTOR_SIGNALING_PATHWAY	GOBP_REGULATION_OF_VASCULAR_ENDOTHELIAL_GROWTH_FACTOR_RECEPTOR_SIGNALING_PATHWAY		24	0.592771	1.6397	0.0137931	0.0622411	1	2885	tags=58%, list=24%, signal=77%
GOBP_NEGATIVE_REGULATION_OF_CELL_DIFFERENTIATION	GOBP_NEGATIVE_REGULATION_OF_CELL_DIFFERENTIATION		418	0.397797	1.63955	0	0.0622481	1	1820	tags=28%, list=15%, signal=32%
HP_HYPOPLASIA_OF_THE_ODONTOID_PROCESS	HP_HYPOPLASIA_OF_THE_ODONTOID_PROCESS		24	0.603261	1.63921	0.0133333	0.0623716	1	1047	tags=29%, list=9%, signal=32%
GSE19401_NAIVE_VS_IMMUNIZED_MOUSE_PLN_FOLLICULAR_DC_UP	GSE19401_NAIVE_VS_IMMUNIZED_MOUSE_PLN_FOLLICULAR_DC_UP		161	0.436213	1.63911	0	0.062353	1	1881	tags=30%, list=16%, signal=36%
GSE3039_CD4_TCELL_VS_ALPHABETA_CD8_TCELL_UP	GSE3039_CD4_TCELL_VS_ALPHABETA_CD8_TCELL_UP		154	0.439358	1.63891	0.00275482	0.0623942	1	1304	tags=23%, list=11%, signal=25%
GOBP_POSITIVE_REGULATION_OF_CELL_SUBSTRATE_ADHESION	GOBP_POSITIVE_REGULATION_OF_CELL_SUBSTRATE_ADHESION		96	0.464841	1.6389	0.00306748	0.0623302	1	1924	tags=36%, list=16%, signal=43%
GOBP_POSITIVE_REGULATION_OF_SMOOTHENED_SIGNALING_PATHWAY	GOBP_POSITIVE_REGULATION_OF_SMOOTHENED_SIGNALING_PATHWAY		30	0.571467	1.63881	0.016835	0.0623161	1	3006	tags=57%, list=25%, signal=76%
GSE11961_FOLLICULAR_BCELL_VS_MEMORY_BCELL_DAY40_DN	GSE11961_FOLLICULAR_BCELL_VS_MEMORY_BCELL_DAY40_DN		151	0.438093	1.63872	0.00136799	0.0622822	1	2351	tags=40%, list=20%, signal=49%
HP_BELL_SHAPED_THORAX	HP_BELL_SHAPED_THORAX		19	0.630551	1.63868	0.0271248	0.0622308	1	2125	tags=47%, list=18%, signal=58%
GSE20152_HTNFA_OVERXPRESS_ANKLE_VS_CTRL_SPHK1_KO_ANKLE_UP	GSE20152_HTNFA_OVERXPRESS_ANKLE_VS_CTRL_SPHK1_KO_ANKLE_UP		145	0.43293	1.63859	0	0.0622234	1	2206	tags=31%, list=19%, signal=38%
HP_CIRRHOSIS	HP_CIRRHOSIS		103	0.460502	1.63822	0.0058997	0.0623855	1	1778	tags=27%, list=15%, signal=32%
GOBP_MUSCLE_CELL_DIFFERENTIATION	GOBP_MUSCLE_CELL_DIFFERENTIATION		233	0.421509	1.63821	0	0.0623187	1	1286	tags=22%, list=11%, signal=25%
GOBP_POSITIVE_REGULATION_OF_P38MAPK_CASCADE	GOBP_POSITIVE_REGULATION_OF_P38MAPK_CASCADE		24	0.59217	1.63769	0.0198347	0.0625338	1	1708	tags=38%, list=14%, signal=44%
GOBP_POSITIVE_REGULATION_OF_LIPASE_ACTIVITY	GOBP_POSITIVE_REGULATION_OF_LIPASE_ACTIVITY		47	0.526888	1.63715	0.00834725	0.0628078	1	2644	tags=47%, list=22%, signal=60%
GOBP_VENTRAL_SPINAL_CORD_DEVELOPMENT	GOBP_VENTRAL_SPINAL_CORD_DEVELOPMENT		20	0.624645	1.63704	0.0313044	0.0627987	1	941	tags=35%, list=8%, signal=38%
GOBP_POSITIVE_REGULATION_OF_PROTEIN_BINDING	GOBP_POSITIVE_REGULATION_OF_PROTEIN_BINDING		71	0.492928	1.63655	0.00463679	0.0630105	1	2499	tags=38%, list=21%, signal=48%
HP_UPPER_EXTREMITY_JOINT_DISLOCATION	HP_UPPER_EXTREMITY_JOINT_DISLOCATION		75	0.48779	1.63641	0.00471698	0.0630285	1	2300	tags=33%, list=19%, signal=41%
HP_ABNORMALITY_OF_THE_ELBOW	HP_ABNORMALITY_OF_THE_ELBOW		185	0.426565	1.63627	0	0.063028	1	1523	tags=26%, list=13%, signal=29%
HP_ANTERIORLY_PLACED_ANUS	HP_ANTERIORLY_PLACED_ANUS		36	0.54835	1.63612	0.0201005	0.0630503	1	1623	tags=36%, list=14%, signal=42%
GSE4142_PLASMA_CELL_VS_MEMORY_BCELL_UP	GSE4142_PLASMA_CELL_VS_MEMORY_BCELL_UP		105	0.465227	1.63586	0	0.0631291	1	1438	tags=30%, list=12%, signal=33%
HP_METAPHYSEAL_IRREGULARITY	HP_METAPHYSEAL_IRREGULARITY		37	0.543896	1.63578	0.019544	0.0631067	1	556	tags=19%, list=5%, signal=20%
P53_DN.V1_DN	P53_DN.V1_DN		139	0.448773	1.63556	0	0.0631712	1	2233	tags=34%, list=19%, signal=41%
HP_PERISYLVIAN_POLYMICROGYRIA	HP_PERISYLVIAN_POLYMICROGYRIA		17	0.63955	1.63537	0.0304659	0.0631911	1	1623	tags=65%, list=14%, signal=75%
HP_ABNORMALITY_OF_THE_CALCANEUS	HP_ABNORMALITY_OF_THE_CALCANEUS		19	0.629632	1.63517	0.0170648	0.063225	1	1730	tags=37%, list=15%, signal=43%
GOBP_CELL_SURFACE_RECEPTOR_SIGNALING_PATHWAY_INVOLVED_IN_HEART_DEVELOPMENT	GOBP_CELL_SURFACE_RECEPTOR_SIGNALING_PATHWAY_INVOLVED_IN_HEART_DEVELOPMENT		22	0.631824	1.63429	0.0166667	0.0636571	1	1596	tags=50%, list=14%, signal=58%
GSE6269_E_COLI_VS_STREP_PNEUMO_INF_PBMC_DN	GSE6269_E_COLI_VS_STREP_PNEUMO_INF_PBMC_DN		132	0.452976	1.63413	0	0.0636829	1	1625	tags=26%, list=14%, signal=30%
GSE43955_1H_VS_42H_ACT_CD4_TCELL_WITH_TGFB_IL6_DN	GSE43955_1H_VS_42H_ACT_CD4_TCELL_WITH_TGFB_IL6_DN		147	0.43974	1.63391	0	0.0637269	1	1707	tags=28%, list=14%, signal=32%
GSE19401_UNSTIM_VS_RETINOIC_ACID_AND_PAM2CSK4_STIM_FOLLICULAR_DC_DN	GSE19401_UNSTIM_VS_RETINOIC_ACID_AND_PAM2CSK4_STIM_FOLLICULAR_DC_DN		167	0.43685	1.6338	0	0.0637223	1	2122	tags=28%, list=18%, signal=33%
GOBP_REGULATION_OF_VESICLE_FUSION	GOBP_REGULATION_OF_VESICLE_FUSION		16	0.643604	1.63355	0.0276339	0.0637856	1	1294	tags=38%, list=11%, signal=42%
GOBP_CELL_SUBSTRATE_JUNCTION_ORGANIZATION	GOBP_CELL_SUBSTRATE_JUNCTION_ORGANIZATION		97	0.464461	1.63352	0.00144928	0.0637294	1	2405	tags=38%, list=20%, signal=48%
GSE360_L_DONOVANI_VS_B_MALAYI_HIGH_DOSE_DC_UP	GSE360_L_DONOVANI_VS_B_MALAYI_HIGH_DOSE_DC_UP		143	0.437888	1.63352	0.00138504	0.0636571	1	1116	tags=21%, list=9%, signal=23%
GSE24210_IL35_TREATED_VS_RESTING_TREG_DN	GSE24210_IL35_TREATED_VS_RESTING_TREG_DN		108	0.4592	1.63291	0.0014771	0.0639585	1	1435	tags=30%, list=12%, signal=33%
GOBP_RESPONSE_TO_NUTRIENT	GOBP_RESPONSE_TO_NUTRIENT		114	0.452095	1.63275	0.00149031	0.0639688	1	1466	tags=23%, list=12%, signal=26%
HP_ABNORMAL_ENCHONDRAL_OSSIFICATION	HP_ABNORMAL_ENCHONDRAL_OSSIFICATION		89	0.469932	1.63257	0.00447761	0.0640068	1	1588	tags=25%, list=13%, signal=28%
GSE43955_TH0_VS_TGFB_IL6_TH17_ACT_CD4_TCELL_4H_UP	GSE43955_TH0_VS_TGFB_IL6_TH17_ACT_CD4_TCELL_4H_UP		162	0.436778	1.63211	0.00135685	0.0642373	1	1381	tags=19%, list=12%, signal=21%
GSE6259_FLT3L_INDUCED_33D1_POS_DC_VS_CD4_TCELL_UP	GSE6259_FLT3L_INDUCED_33D1_POS_DC_VS_CD4_TCELL_UP		140	0.443273	1.6319	0.00142857	0.0642909	1	2314	tags=35%, list=20%, signal=43%
MATSUMIYA_PBMC_MODIFIED_VACCINIA_ANKARA_VACCINE_AGE_18_55YO_VACCINATED_VS_CONTROL_TREATED_IN_VITRO_WITH_MVA85A_6HR_UP	MATSUMIYA_PBMC_MODIFIED_VACCINIA_ANKARA_VACCINE_AGE_18_55YO_VACCINATED_VS_CONTROL_TREATED_IN_VITRO_WITH_MVA85A_6HR_UP		69	0.490763	1.63174	0.00468019	0.0643178	1	2487	tags=39%, list=21%, signal=49%
GSE24634_TREG_VS_TCONV_POST_DAY7_IL4_CONVERSION_DN	GSE24634_TREG_VS_TCONV_POST_DAY7_IL4_CONVERSION_DN		170	0.43222	1.63171	0.00140056	0.0642583	1	1958	tags=28%, list=17%, signal=33%
GSE32901_NAIVE_VS_TH1_CD4_TCELL_UP	GSE32901_NAIVE_VS_TH1_CD4_TCELL_UP		94	0.466828	1.63162	0	0.0642254	1	1671	tags=21%, list=14%, signal=25%
GSE21380_NON_TFH_VS_TFH_CD4_TCELL_UP	GSE21380_NON_TFH_VS_TFH_CD4_TCELL_UP		166	0.430292	1.63162	0.00134771	0.0641544	1	2378	tags=33%, list=20%, signal=41%
GSE24142_EARLY_THYMIC_PROGENITOR_VS_DN2_THYMOCYTE_FETAL_DN	GSE24142_EARLY_THYMIC_PROGENITOR_VS_DN2_THYMOCYTE_FETAL_DN		140	0.442063	1.63115	0	0.0643674	1	1397	tags=25%, list=12%, signal=28%
GOBP_NEGATIVE_REGULATION_OF_STEROID_METABOLIC_PROCESS	GOBP_NEGATIVE_REGULATION_OF_STEROID_METABOLIC_PROCESS		16	0.65054	1.63115	0.0265957	0.0642996	1	1416	tags=38%, list=12%, signal=43%
GOBP_REGULATION_OF_GROWTH	GOBP_REGULATION_OF_GROWTH		458	0.392184	1.63091	0	0.0643528	1	2002	tags=27%, list=17%, signal=31%
GOBP_REGULATION_OF_CELL_GROWTH_INVOLVED_IN_CARDIAC_MUSCLE_CELL_DEVELOPMENT	GOBP_REGULATION_OF_CELL_GROWTH_INVOLVED_IN_CARDIAC_MUSCLE_CELL_DEVELOPMENT		15	0.664791	1.63051	0.0319149	0.0644661	1	1158	tags=33%, list=10%, signal=37%
GOBP_NOTCH_SIGNALING_PATHWAY	GOBP_NOTCH_SIGNALING_PATHWAY		137	0.438329	1.63003	0.00278552	0.0646872	1	1991	tags=31%, list=17%, signal=36%
HP_ABDOMINAL_AORTIC_ANEURYSM	HP_ABDOMINAL_AORTIC_ANEURYSM		16	0.663628	1.62968	0.0163399	0.0648369	1	1040	tags=31%, list=9%, signal=34%
HP_WIDE_ANTERIOR_FONTANEL	HP_WIDE_ANTERIOR_FONTANEL		58	0.511998	1.62967	0.00830565	0.06477	1	1504	tags=26%, list=13%, signal=29%
GOBP_NEGATIVE_REGULATION_OF_SMOOTH_MUSCLE_CELL_MIGRATION	GOBP_NEGATIVE_REGULATION_OF_SMOOTH_MUSCLE_CELL_MIGRATION		17	0.64603	1.62939	0.0217786	0.0648677	1	1998	tags=47%, list=17%, signal=57%
GSE21546_WT_VS_SAP1A_KO_AND_ELK1_KO_ANTI_CD3_STIM_DP_THYMOCYTES_UP	GSE21546_WT_VS_SAP1A_KO_AND_ELK1_KO_ANTI_CD3_STIM_DP_THYMOCYTES_UP		139	0.442557	1.62916	0.0014881	0.0649219	1	1664	tags=24%, list=14%, signal=27%
HP_EMG_MYOPATHIC_ABNORMALITIES	HP_EMG_MYOPATHIC_ABNORMALITIES		82	0.474642	1.62896	0.010479	0.0649592	1	1748	tags=33%, list=15%, signal=38%
GOBP_ENDOCARDIAL_CUSHION_MORPHOGENESIS	GOBP_ENDOCARDIAL_CUSHION_MORPHOGENESIS		22	0.608374	1.62894	0.0229133	0.0649019	1	1778	tags=64%, list=15%, signal=75%
GSE3039_ALPHAALPHA_CD8_TCELL_VS_B2_BCELL_DN	GSE3039_ALPHAALPHA_CD8_TCELL_VS_B2_BCELL_DN		159	0.427021	1.62886	0	0.0648721	1	2584	tags=36%, list=22%, signal=45%
GOBP_MUSCLE_CONTRACTION	GOBP_MUSCLE_CONTRACTION		218	0.417877	1.62811	0	0.0652858	1	2003	tags=32%, list=17%, signal=37%
HP_ABNORMALITY_OF_THE_ODONTOID_PROCESS	HP_ABNORMALITY_OF_THE_ODONTOID_PROCESS		26	0.595405	1.62796	0.0154905	0.065311	1	1618	tags=35%, list=14%, signal=40%
GSE3982_BCELL_VS_CENT_MEMORY_CD4_TCELL_DN	GSE3982_BCELL_VS_CENT_MEMORY_CD4_TCELL_DN		125	0.448562	1.62793	0	0.065263	1	2550	tags=41%, list=22%, signal=51%
GOCC_ADHERENS_JUNCTION	GOCC_ADHERENS_JUNCTION		131	0.443594	1.62786	0.00138122	0.0652329	1	2425	tags=48%, list=21%, signal=60%
GOBP_VENTRICULAR_SEPTUM_MORPHOGENESIS	GOBP_VENTRICULAR_SEPTUM_MORPHOGENESIS		28	0.592955	1.62778	0.0211382	0.0652122	1	1349	tags=46%, list=11%, signal=52%
GOBP_REGULATION_OF_ENDOTHELIAL_CELL_DIFFERENTIATION	GOBP_REGULATION_OF_ENDOTHELIAL_CELL_DIFFERENTIATION		26	0.587043	1.62738	0.015	0.065374	1	1570	tags=38%, list=13%, signal=44%
GOBP_POSITIVE_REGULATION_OF_NEURAL_PRECURSOR_CELL_PROLIFERATION	GOBP_POSITIVE_REGULATION_OF_NEURAL_PRECURSOR_CELL_PROLIFERATION		34	0.560484	1.62735	0.0128411	0.0653209	1	1991	tags=53%, list=17%, signal=63%
GOBP_REGULATION_OF_MACROPHAGE_MIGRATION	GOBP_REGULATION_OF_MACROPHAGE_MIGRATION		29	0.571643	1.62718	0.029703	0.0653221	1	2234	tags=48%, list=19%, signal=59%
GOBP_STEROID_HORMONE_BIOSYNTHETIC_PROCESS	GOBP_STEROID_HORMONE_BIOSYNTHETIC_PROCESS		29	0.577061	1.62704	0.0205696	0.0653305	1	992	tags=31%, list=8%, signal=34%
GOBP_ACTIN_FILAMENT_BUNDLE_ORGANIZATION	GOBP_ACTIN_FILAMENT_BUNDLE_ORGANIZATION		123	0.446912	1.62675	0.00708215	0.0654343	1	2711	tags=41%, list=23%, signal=52%
HP_RAYNAUD_PHENOMENON	HP_RAYNAUD_PHENOMENON		17	0.639821	1.62641	0.0270758	0.0655503	1	640	tags=18%, list=5%, signal=19%
GSE35543_IN_VIVO_NTREG_VS_IN_VITRO_ITREG_UP	GSE35543_IN_VIVO_NTREG_VS_IN_VITRO_ITREG_UP		96	0.463741	1.62599	0.00310078	0.0657366	1	1834	tags=34%, list=16%, signal=40%
GSE7852_THYMUS_VS_FAT_TCONV_DN	GSE7852_THYMUS_VS_FAT_TCONV_DN		166	0.430089	1.62595	0.00139276	0.0656979	1	2369	tags=36%, list=20%, signal=45%
GSE360_L_DONOVANI_VS_B_MALAYI_HIGH_DOSE_MAC_UP	GSE360_L_DONOVANI_VS_B_MALAYI_HIGH_DOSE_MAC_UP		148	0.435741	1.62562	0.00140056	0.0658204	1	1630	tags=25%, list=14%, signal=29%
HP_FATIGABLE_WEAKNESS_OF_SKELETAL_MUSCLES	HP_FATIGABLE_WEAKNESS_OF_SKELETAL_MUSCLES		20	0.621559	1.6247	0.0202703	0.0662866	1	1248	tags=25%, list=11%, signal=28%
GOBP_NAD_BIOSYNTHETIC_PROCESS	GOBP_NAD_BIOSYNTHETIC_PROCESS		18	0.630201	1.62427	0.010929	0.0664855	1	118	tags=17%, list=1%, signal=17%
GSE3039_CD4_TCELL_VS_B2_BCELL_UP	GSE3039_CD4_TCELL_VS_B2_BCELL_UP		160	0.427678	1.62424	0.00414365	0.0664349	1	1077	tags=21%, list=9%, signal=22%
GOBP_HUMORAL_IMMUNE_RESPONSE	GOBP_HUMORAL_IMMUNE_RESPONSE		128	0.447274	1.62326	0	0.066977	1	596	tags=17%, list=5%, signal=18%
GSE37532_WT_VS_PPARG_KO_LN_TREG_DN	GSE37532_WT_VS_PPARG_KO_LN_TREG_DN		47	0.511449	1.62317	0.016129	0.0669619	1	1186	tags=30%, list=10%, signal=33%
GOBP_HORMONE_METABOLIC_PROCESS	GOBP_HORMONE_METABOLIC_PROCESS		110	0.458955	1.62299	0.00294118	0.0669919	1	2535	tags=47%, list=21%, signal=60%
GSE20366_CD103_POS_VS_NEG_TREG_KLRG1NEG_UP	GSE20366_CD103_POS_VS_NEG_TREG_KLRG1NEG_UP		109	0.456985	1.62274	0.004329	0.0670631	1	2656	tags=41%, list=22%, signal=53%
HP_ABNORMALITY_OF_THE_POSTERIOR_PITUITARY	HP_ABNORMALITY_OF_THE_POSTERIOR_PITUITARY		32	0.564373	1.62194	0.0128411	0.0674751	1	2110	tags=53%, list=18%, signal=65%
GOBP_MUSCLE_TISSUE_DEVELOPMENT	GOBP_MUSCLE_TISSUE_DEVELOPMENT		244	0.415185	1.62151	0	0.0676735	1	1474	tags=28%, list=12%, signal=32%
GSE40274_CTRL_VS_FOXP3_AND_LEF1_TRANSDUCED_ACTIVATED_CD4_TCELL_UP	GSE40274_CTRL_VS_FOXP3_AND_LEF1_TRANSDUCED_ACTIVATED_CD4_TCELL_UP		117	0.448341	1.62111	0.00143472	0.0678427	1	2202	tags=39%, list=19%, signal=48%
GOBP_NEGATIVE_REGULATION_OF_EPITHELIAL_TO_MESENCHYMAL_TRANSITION	GOBP_NEGATIVE_REGULATION_OF_EPITHELIAL_TO_MESENCHYMAL_TRANSITION		21	0.605401	1.62085	0.0160142	0.0679117	1	2843	tags=57%, list=24%, signal=75%
HP_PROXIMAL_MUSCLE_WEAKNESS_IN_UPPER_LIMBS	HP_PROXIMAL_MUSCLE_WEAKNESS_IN_UPPER_LIMBS		27	0.579338	1.6204	0.0185811	0.0681152	1	2966	tags=48%, list=25%, signal=64%
GOBP_REGULATION_OF_MONONUCLEAR_CELL_MIGRATION	GOBP_REGULATION_OF_MONONUCLEAR_CELL_MIGRATION		83	0.471184	1.62036	0.00305344	0.0680715	1	1826	tags=28%, list=15%, signal=33%
GOBP_STRESS_FIBER_ASSEMBLY	GOBP_STRESS_FIBER_ASSEMBLY		85	0.467479	1.6203	0.00753012	0.068033	1	2711	tags=40%, list=23%, signal=52%
GSE37605_FOXP3_FUSION_GFP_VS_IRES_GFP_TREG_C57BL6_DN	GSE37605_FOXP3_FUSION_GFP_VS_IRES_GFP_TREG_C57BL6_DN		149	0.436122	1.61975	0	0.0682976	1	1316	tags=23%, list=11%, signal=26%
GOBP_PLATELET_DERIVED_GROWTH_FACTOR_RECEPTOR_SIGNALING_PATHWAY	GOBP_PLATELET_DERIVED_GROWTH_FACTOR_RECEPTOR_SIGNALING_PATHWAY		47	0.520609	1.61964	0.0154799	0.0682904	1	800	tags=23%, list=7%, signal=25%
GSE24142_DN2_VS_DN3_THYMOCYTE_FETAL_UP	GSE24142_DN2_VS_DN3_THYMOCYTE_FETAL_UP		162	0.432287	1.61944	0.00289017	0.068334	1	1770	tags=28%, list=15%, signal=33%
HP_APLASIA_HYPOPLASIA_INVOLVING_THE_PELVIS	HP_APLASIA_HYPOPLASIA_INVOLVING_THE_PELVIS		49	0.51922	1.6194	0.0120664	0.0682853	1	2125	tags=33%, list=18%, signal=40%
RB_P107_DN.V1_UP	RB_P107_DN.V1_UP		103	0.453634	1.61935	0.00149477	0.0682346	1	1023	tags=19%, list=9%, signal=21%
HP_SCAPULAR_WINGING	HP_SCAPULAR_WINGING		55	0.502623	1.61899	0.00787402	0.0684218	1	1822	tags=29%, list=15%, signal=34%
GSE2405_S_AUREUS_VS_A_PHAGOCYTOPHILUM_NEUTROPHIL_UP	GSE2405_S_AUREUS_VS_A_PHAGOCYTOPHILUM_NEUTROPHIL_UP		145	0.436409	1.61862	0.00552486	0.0685952	1	1783	tags=31%, list=15%, signal=36%
HP_MULTIPLE_JOINT_CONTRACTURES	HP_MULTIPLE_JOINT_CONTRACTURES		45	0.523014	1.61802	0.0153846	0.0689221	1	1320	tags=18%, list=11%, signal=20%
HP_PRE_CAPILLARY_PULMONARY_HYPERTENSION	HP_PRE_CAPILLARY_PULMONARY_HYPERTENSION		91	0.470134	1.61733	0.0101892	0.0692683	1	1778	tags=30%, list=15%, signal=35%
GOBP_REGULATION_OF_TRANSMEMBRANE_RECEPTOR_PROTEIN_SERINE_THREONINE_KINASE_SIGNALING_PATHWAY	GOBP_REGULATION_OF_TRANSMEMBRANE_RECEPTOR_PROTEIN_SERINE_THREONINE_KINASE_SIGNALING_PATHWAY		167	0.435742	1.61664	0.00134228	0.0696559	1	1643	tags=33%, list=14%, signal=38%
GOBP_CHONDROITIN_SULFATE_PROTEOGLYCAN_METABOLIC_PROCESS	GOBP_CHONDROITIN_SULFATE_PROTEOGLYCAN_METABOLIC_PROCESS		30	0.574239	1.61611	0.0205479	0.0699158	1	2035	tags=40%, list=17%, signal=48%
GSE36826_WT_VS_IL1R_KO_SKIN_DN	GSE36826_WT_VS_IL1R_KO_SKIN_DN		164	0.427973	1.61593	0.00284091	0.0699522	1	1614	tags=24%, list=14%, signal=27%
GOBP_RESPONSE_TO_ESTROGEN	GOBP_RESPONSE_TO_ESTROGEN		49	0.523247	1.61573	0.00651466	0.0700106	1	1327	tags=29%, list=11%, signal=32%
HP_ABNORMALITY_OF_THE_ACETABULUM	HP_ABNORMALITY_OF_THE_ACETABULUM		55	0.507111	1.61571	0.0163399	0.0699566	1	899	tags=18%, list=8%, signal=20%
GOBP_POSITIVE_REGULATION_OF_RECEPTOR_INTERNALIZATION	GOBP_POSITIVE_REGULATION_OF_RECEPTOR_INTERNALIZATION		19	0.633701	1.61563	0.0291096	0.0699177	1	2135	tags=47%, list=18%, signal=58%
HP_CENTRAL_HYPOTHYROIDISM	HP_CENTRAL_HYPOTHYROIDISM		38	0.541053	1.61544	0.0140845	0.069955	1	1773	tags=47%, list=15%, signal=56%
HP_WADDLING_GAIT	HP_WADDLING_GAIT		76	0.479109	1.61534	0.00949367	0.0699671	1	1519	tags=24%, list=13%, signal=27%
GOBP_ERBB_SIGNALING_PATHWAY	GOBP_ERBB_SIGNALING_PATHWAY		107	0.458494	1.61529	0.00142248	0.0699303	1	1933	tags=26%, list=16%, signal=31%
GOBP_CHONDROITIN_SULFATE_BIOSYNTHETIC_PROCESS	GOBP_CHONDROITIN_SULFATE_BIOSYNTHETIC_PROCESS		18	0.635722	1.61527	0.0246479	0.0698647	1	2035	tags=44%, list=17%, signal=54%
HP_SINGLE_MEDIAN_MAXILLARY_INCISOR	HP_SINGLE_MEDIAN_MAXILLARY_INCISOR		17	0.642014	1.61523	0.0188034	0.0698142	1	1623	tags=59%, list=14%, signal=68%
GSE42021_TREG_PLN_VS_CD24HI_TREG_THYMUS_UP	GSE42021_TREG_PLN_VS_CD24HI_TREG_THYMUS_UP		171	0.430412	1.61509	0.00132802	0.0698255	1	1765	tags=26%, list=15%, signal=30%
GOBP_PEPTIDE_SECRETION	GOBP_PEPTIDE_SECRETION		255	0.410084	1.61497	0	0.0698388	1	2145	tags=30%, list=18%, signal=36%
GSE29618_MONOCYTE_VS_MDC_UP	GSE29618_MONOCYTE_VS_MDC_UP		166	0.425589	1.61485	0.0013587	0.0698382	1	1937	tags=29%, list=16%, signal=34%
HP_AORTIC_ANEURYSM	HP_AORTIC_ANEURYSM		111	0.449753	1.61481	0.00290276	0.0697869	1	1941	tags=26%, list=16%, signal=31%
GOBP_POSITIVE_REGULATION_OF_PROTEIN_TYROSINE_KINASE_ACTIVITY	GOBP_POSITIVE_REGULATION_OF_PROTEIN_TYROSINE_KINASE_ACTIVITY		40	0.518563	1.61459	0.012945	0.0698477	1	1985	tags=43%, list=17%, signal=51%
GSE4811_CLASSSICALY_ACTIVATED_VS_TYPE_2_ACTIVATED_MACROPHAGE_DN	GSE4811_CLASSSICALY_ACTIVATED_VS_TYPE_2_ACTIVATED_MACROPHAGE_DN		104	0.458534	1.61443	0.00436047	0.0698857	1	1956	tags=32%, list=17%, signal=38%
GOBP_INSULIN_LIKE_GROWTH_FACTOR_RECEPTOR_SIGNALING_PATHWAY	GOBP_INSULIN_LIKE_GROWTH_FACTOR_RECEPTOR_SIGNALING_PATHWAY		21	0.620721	1.61378	0.0189983	0.0702096	1	1158	tags=33%, list=10%, signal=37%
GSE19401_UNSTIM_VS_RETINOIC_ACID_STIM_FOLLICULAR_DC_UP	GSE19401_UNSTIM_VS_RETINOIC_ACID_STIM_FOLLICULAR_DC_UP		150	0.432711	1.61365	0.00143062	0.0702195	1	2439	tags=31%, list=21%, signal=38%
GSE9988_LPS_VS_LPS_AND_ANTI_TREM1_MONOCYTE_DN	GSE9988_LPS_VS_LPS_AND_ANTI_TREM1_MONOCYTE_DN		148	0.428465	1.61364	0.00135318	0.0701543	1	1895	tags=26%, list=16%, signal=30%
GSE19825_NAIVE_VS_IL2RAHIGH_DAY3_EFF_CD8_TCELL_UP	GSE19825_NAIVE_VS_IL2RAHIGH_DAY3_EFF_CD8_TCELL_UP		94	0.461424	1.61357	0.0046083	0.0701326	1	1933	tags=37%, list=16%, signal=44%
GOBP_EAR_DEVELOPMENT	GOBP_EAR_DEVELOPMENT		117	0.44588	1.61325	0.00436681	0.0702756	1	1727	tags=33%, list=15%, signal=39%
GSE24574_BCL6_HIGH_TFH_VS_TCONV_CD4_TCELL_UP	GSE24574_BCL6_HIGH_TFH_VS_TCONV_CD4_TCELL_UP		145	0.436109	1.61309	0	0.0703198	1	1375	tags=25%, list=12%, signal=28%
HP_BASAL_GANGLIA_CALCIFICATION	HP_BASAL_GANGLIA_CALCIFICATION		26	0.585909	1.61303	0.0165837	0.0702705	1	1031	tags=23%, list=9%, signal=25%
GOBP_REGULATION_OF_ERBB_SIGNALING_PATHWAY	GOBP_REGULATION_OF_ERBB_SIGNALING_PATHWAY		71	0.487547	1.6129	0.00473186	0.0702842	1	1933	tags=27%, list=16%, signal=32%
GSE9988_ANTI_TREM1_AND_LPS_VS_VEHICLE_TREATED_MONOCYTES_UP	GSE9988_ANTI_TREM1_AND_LPS_VS_VEHICLE_TREATED_MONOCYTES_UP		137	0.433212	1.6124	0.00418994	0.0705519	1	774	tags=17%, list=7%, signal=18%
HP_RECTAL_PROLAPSE	HP_RECTAL_PROLAPSE		22	0.59832	1.61224	0.0203735	0.0705829	1	1596	tags=36%, list=14%, signal=42%
GOBP_POSITIVE_REGULATION_OF_COAGULATION	GOBP_POSITIVE_REGULATION_OF_COAGULATION		17	0.639458	1.61178	0.0255941	0.0707774	1	598	tags=35%, list=5%, signal=37%
RELA_DN.V1_UP	RELA_DN.V1_UP		94	0.458724	1.61163	0.00315457	0.0708022	1	1910	tags=38%, list=16%, signal=45%
HP_ABNORMAL_SHOULDER_MORPHOLOGY	HP_ABNORMAL_SHOULDER_MORPHOLOGY		68	0.481721	1.61162	0.00911854	0.0707341	1	1884	tags=34%, list=16%, signal=40%
GOBP_SKIN_DEVELOPMENT	GOBP_SKIN_DEVELOPMENT		165	0.418351	1.61147	0.00283286	0.0707637	1	1288	tags=27%, list=11%, signal=30%
GSE43863_TH1_VS_LY6C_INT_CXCR5POS_MEMORY_CD4_TCELL_DN	GSE43863_TH1_VS_LY6C_INT_CXCR5POS_MEMORY_CD4_TCELL_DN		132	0.441763	1.61145	0.003003	0.0707046	1	2567	tags=41%, list=22%, signal=52%
GSE9316_IL6_KO_VS_IFNG_KO_INVIVO_EXPANDED_CD4_TCELL_DN	GSE9316_IL6_KO_VS_IFNG_KO_INVIVO_EXPANDED_CD4_TCELL_DN		170	0.425891	1.61115	0.00278552	0.070811	1	1228	tags=22%, list=10%, signal=25%
GSE2706_R848_VS_R848_AND_LPS_2H_STIM_DC_DN	GSE2706_R848_VS_R848_AND_LPS_2H_STIM_DC_DN		123	0.439891	1.61078	0.00289017	0.0709477	1	1591	tags=24%, list=13%, signal=27%
GOBP_ICOSANOID_SECRETION	GOBP_ICOSANOID_SECRETION		20	0.608458	1.61035	0.0245184	0.071147	1	1689	tags=45%, list=14%, signal=52%
THAKAR_PBMC_INACTIVATED_INFLUENZA_AGE_70PLS_NONRESPONDER_2DY_DN	THAKAR_PBMC_INACTIVATED_INFLUENZA_AGE_70PLS_NONRESPONDER_2DY_DN		128	0.436257	1.61023	0.00288184	0.0711519	1	3316	tags=48%, list=28%, signal=66%
HP_UROGENITAL_FISTULA	HP_UROGENITAL_FISTULA		26	0.588759	1.6101	0.0183028	0.0711412	1	621	tags=15%, list=5%, signal=16%
GOBP_PEPTIDE_HORMONE_SECRETION	GOBP_PEPTIDE_HORMONE_SECRETION		147	0.43514	1.60972	0.00429185	0.071332	1	1987	tags=30%, list=17%, signal=36%
HP_INTRACRANIAL_HEMORRHAGE	HP_INTRACRANIAL_HEMORRHAGE		102	0.456311	1.60944	0.00724638	0.0714548	1	1778	tags=25%, list=15%, signal=29%
GSE7460_WT_VS_FOXP3_HET_ACT_WITH_TGFB_TCONV_UP	GSE7460_WT_VS_FOXP3_HET_ACT_WITH_TGFB_TCONV_UP		161	0.426729	1.60915	0.0027894	0.0715571	1	2678	tags=35%, list=23%, signal=45%
GOBP_STRIATED_MUSCLE_CELL_PROLIFERATION	GOBP_STRIATED_MUSCLE_CELL_PROLIFERATION		42	0.535445	1.60849	0.0172414	0.071916	1	1760	tags=40%, list=15%, signal=47%
GOBP_NEGATIVE_REGULATION_OF_HYDROLASE_ACTIVITY	GOBP_NEGATIVE_REGULATION_OF_HYDROLASE_ACTIVITY		273	0.402604	1.60839	0	0.0719189	1	1576	tags=23%, list=13%, signal=26%
GSE41867_DAY6_VS_DAY15_LCMV_CLONE13_EFFECTOR_CD8_TCELL_DN	GSE41867_DAY6_VS_DAY15_LCMV_CLONE13_EFFECTOR_CD8_TCELL_DN		70	0.48097	1.60829	0.00928793	0.0719006	1	1527	tags=36%, list=13%, signal=41%
GSE360_L_DONOVANI_VS_M_TUBERCULOSIS_MAC_DN	GSE360_L_DONOVANI_VS_M_TUBERCULOSIS_MAC_DN		145	0.43076	1.6081	0.00561798	0.0719442	1	2704	tags=34%, list=23%, signal=43%
GOBP_CELL_MORPHOGENESIS_INVOLVED_IN_NEURON_DIFFERENTIATION	GOBP_CELL_MORPHOGENESIS_INVOLVED_IN_NEURON_DIFFERENTIATION		403	0.392239	1.60702	0	0.0725705	1	1937	tags=28%, list=16%, signal=32%
GSE1460_NAIVE_CD4_TCELL_ADULT_BLOOD_VS_THYMIC_STROMAL_CELL_DN	GSE1460_NAIVE_CD4_TCELL_ADULT_BLOOD_VS_THYMIC_STROMAL_CELL_DN		163	0.424527	1.60676	0	0.0726526	1	2096	tags=28%, list=18%, signal=34%
GSE1112_HY_CD8AB_VS_HY_CD8AA_THYMOCYTE_RTOC_CULTURE_DN	GSE1112_HY_CD8AB_VS_HY_CD8AA_THYMOCYTE_RTOC_CULTURE_DN		140	0.434311	1.60584	0	0.073209	1	1665	tags=25%, list=14%, signal=29%
GOBP_CELL_CELL_JUNCTION_ORGANIZATION	GOBP_CELL_CELL_JUNCTION_ORGANIZATION		139	0.433215	1.60555	0.00423729	0.0733487	1	2425	tags=37%, list=21%, signal=47%
GOBP_GLOMERULUS_DEVELOPMENT	GOBP_GLOMERULUS_DEVELOPMENT		44	0.526014	1.60529	0.0273312	0.0734461	1	1760	tags=52%, list=15%, signal=61%
GOBP_REGULATION_OF_MAPK_CASCADE	GOBP_REGULATION_OF_MAPK_CASCADE		489	0.388263	1.60496	0	0.0735785	1	1502	tags=24%, list=13%, signal=26%
GOBP_RESPONSE_TO_MUSCLE_STRETCH	GOBP_RESPONSE_TO_MUSCLE_STRETCH		17	0.63459	1.60495	0.0301954	0.07351	1	1413	tags=29%, list=12%, signal=33%
GOBP_POSITIVE_REGULATION_OF_INFLAMMATORY_RESPONSE	GOBP_POSITIVE_REGULATION_OF_INFLAMMATORY_RESPONSE		95	0.45749	1.60492	0.00594354	0.0734589	1	1933	tags=34%, list=16%, signal=40%
GSE30083_SP2_VS_SP3_THYMOCYTE_DN	GSE30083_SP2_VS_SP3_THYMOCYTE_DN		152	0.427207	1.60477	0.00551724	0.0734966	1	1897	tags=33%, list=16%, signal=39%
GOBP_REGULATION_OF_NEURON_PROJECTION_DEVELOPMENT	GOBP_REGULATION_OF_NEURON_PROJECTION_DEVELOPMENT		318	0.398475	1.60473	0.00127389	0.0734541	1	1882	tags=27%, list=16%, signal=31%
GOBP_FEMALE_GAMETE_GENERATION	GOBP_FEMALE_GAMETE_GENERATION		77	0.475102	1.60444	0.0060698	0.0735717	1	809	tags=18%, list=7%, signal=19%
HP_FLAT_ACETABULAR_ROOF	HP_FLAT_ACETABULAR_ROOF		19	0.605006	1.60444	0.0442177	0.0735026	1	271	tags=11%, list=2%, signal=11%
GOBP_NEURON_PROJECTION_EXTENSION_INVOLVED_IN_NEURON_PROJECTION_GUIDANCE	GOBP_NEURON_PROJECTION_EXTENSION_INVOLVED_IN_NEURON_PROJECTION_GUIDANCE		32	0.559737	1.6042	0.0241935	0.0735467	1	1998	tags=50%, list=17%, signal=60%
HP_EMG_IMPAIRED_NEUROMUSCULAR_TRANSMISSION	HP_EMG_IMPAIRED_NEUROMUSCULAR_TRANSMISSION		16	0.638668	1.60416	0.03125	0.0735024	1	951	tags=25%, list=8%, signal=27%
STK33_SKM_UP	STK33_SKM_UP		209	0.411677	1.60401	0	0.0735295	1	1905	tags=28%, list=16%, signal=33%
GOBP_CELL_RECOGNITION	GOBP_CELL_RECOGNITION		95	0.458906	1.60394	0.00445104	0.0734996	1	1731	tags=34%, list=15%, signal=39%
HP_SHORT_CLAVICLES	HP_SHORT_CLAVICLES		24	0.580432	1.60332	0.0316667	0.0738181	1	2229	tags=54%, list=19%, signal=67%
HP_MIXED_HEARING_IMPAIRMENT	HP_MIXED_HEARING_IMPAIRMENT		20	0.613554	1.603	0.0155979	0.0739422	1	1620	tags=45%, list=14%, signal=52%
GSE43955_TH0_VS_TGFB_IL6_TH17_ACT_CD4_TCELL_30H_UP	GSE43955_TH0_VS_TGFB_IL6_TH17_ACT_CD4_TCELL_30H_UP		143	0.429492	1.60297	0.00559441	0.0738855	1	1921	tags=29%, list=16%, signal=35%
GSE24142_ADULT_VS_FETAL_DN3_THYMOCYTE_DN	GSE24142_ADULT_VS_FETAL_DN3_THYMOCYTE_DN		152	0.4281	1.60293	0.00140647	0.0738345	1	1819	tags=28%, list=15%, signal=32%
HP_ABNORMAL_PUPIL_MORPHOLOGY	HP_ABNORMAL_PUPIL_MORPHOLOGY		34	0.553808	1.6028	0.0145631	0.0738403	1	1763	tags=35%, list=15%, signal=41%
GOBP_REGULATION_OF_PEPTIDE_HORMONE_SECRETION	GOBP_REGULATION_OF_PEPTIDE_HORMONE_SECRETION		121	0.446561	1.60272	0.00587371	0.073815	1	1987	tags=30%, list=17%, signal=35%
HP_XANTHOMATOSIS	HP_XANTHOMATOSIS		18	0.620321	1.60269	0.0291595	0.0737642	1	2986	tags=72%, list=25%, signal=97%
GOBP_DETECTION_OF_BIOTIC_STIMULUS	GOBP_DETECTION_OF_BIOTIC_STIMULUS		22	0.607931	1.60245	0.0382514	0.073835	1	1687	tags=41%, list=14%, signal=48%
KEGG_WNT_SIGNALING_PATHWAY	KEGG_WNT_SIGNALING_PATHWAY		109	0.452709	1.60219	0.00146413	0.073942	1	1554	tags=23%, list=13%, signal=26%
GSE34156_UNTREATED_VS_24H_NOD2_AND_TLR1_TLR2_LIGAND_TREATED_MONOCYTE_UP	GSE34156_UNTREATED_VS_24H_NOD2_AND_TLR1_TLR2_LIGAND_TREATED_MONOCYTE_UP		113	0.442666	1.60217	0.00295858	0.073882	1	2527	tags=37%, list=21%, signal=47%
HP_ABNORMAL_MUSCLE_FIBER_PROTEIN_EXPRESSION	HP_ABNORMAL_MUSCLE_FIBER_PROTEIN_EXPRESSION		23	0.599501	1.60195	0.026362	0.0739551	1	1248	tags=26%, list=11%, signal=29%
GOBP_REGULATION_OF_CYSTEINE_TYPE_ENDOPEPTIDASE_ACTIVITY_INVOLVED_IN_APOPTOTIC_SIGNALING_PATHWAY	GOBP_REGULATION_OF_CYSTEINE_TYPE_ENDOPEPTIDASE_ACTIVITY_INVOLVED_IN_APOPTOTIC_SIGNALING_PATHWAY		15	0.641183	1.60181	0.0367133	0.0739719	1	841	tags=27%, list=7%, signal=29%
GSE8621_UNSTIM_VS_LPS_PRIMED_AND_LPS_STIM_MACROPHAGE_UP	GSE8621_UNSTIM_VS_LPS_PRIMED_AND_LPS_STIM_MACROPHAGE_UP		146	0.432192	1.60173	0.00285307	0.0739541	1	2389	tags=36%, list=20%, signal=44%
GOBP_DIENCEPHALON_DEVELOPMENT	GOBP_DIENCEPHALON_DEVELOPMENT		31	0.555447	1.60172	0.025	0.073883	1	1814	tags=42%, list=15%, signal=49%
GOBP_NEGATIVE_REGULATION_OF_CELL_DEVELOPMENT	GOBP_NEGATIVE_REGULATION_OF_CELL_DEVELOPMENT		115	0.444796	1.60093	0.00434153	0.0743423	1	1668	tags=29%, list=14%, signal=33%
GOBP_CELLULAR_RESPONSE_TO_FLUID_SHEAR_STRESS	GOBP_CELLULAR_RESPONSE_TO_FLUID_SHEAR_STRESS		15	0.654528	1.60038	0.0228873	0.0746227	1	1819	tags=40%, list=15%, signal=47%
GOBP_POSITIVE_REGULATION_OF_LEUKOCYTE_ADHESION_TO_VASCULAR_ENDOTHELIAL_CELL	GOBP_POSITIVE_REGULATION_OF_LEUKOCYTE_ADHESION_TO_VASCULAR_ENDOTHELIAL_CELL		20	0.614028	1.59989	0.0170648	0.0748839	1	1603	tags=45%, list=14%, signal=52%
GOBP_PROTEIN_KINASE_C_ACTIVATING_G_PROTEIN_COUPLED_RECEPTOR_SIGNALING_PATHWAY	GOBP_PROTEIN_KINASE_C_ACTIVATING_G_PROTEIN_COUPLED_RECEPTOR_SIGNALING_PATHWAY		18	0.636297	1.59959	0.0259067	0.0750235	1	2334	tags=56%, list=20%, signal=69%
GOBP_REGULATION_OF_RECEPTOR_INTERNALIZATION	GOBP_REGULATION_OF_RECEPTOR_INTERNALIZATION		36	0.541503	1.59934	0.0175719	0.0751229	1	2135	tags=36%, list=18%, signal=44%
GSE25846_IL10_POS_VS_NEG_CD8_TCELL_DAY7_POST_CORONAVIRUS_BRAIN_UP	GSE25846_IL10_POS_VS_NEG_CD8_TCELL_DAY7_POST_CORONAVIRUS_BRAIN_UP		127	0.443555	1.5991	0.00301205	0.0752073	1	1742	tags=24%, list=15%, signal=28%
GOBP_MUSCLE_ADAPTATION	GOBP_MUSCLE_ADAPTATION		72	0.478349	1.5988	0.00911854	0.0753219	1	1375	tags=25%, list=12%, signal=28%
GOBP_REGULATION_OF_PROTEIN_MATURATION	GOBP_REGULATION_OF_PROTEIN_MATURATION		39	0.534274	1.59879	0.0111288	0.0752519	1	622	tags=26%, list=5%, signal=27%
GOBP_MEMBRANE_PROTEIN_ECTODOMAIN_PROTEOLYSIS	GOBP_MEMBRANE_PROTEIN_ECTODOMAIN_PROTEOLYSIS		38	0.533173	1.59842	0.0289389	0.0754034	1	2692	tags=42%, list=23%, signal=54%
HP_PITUITARY_HYPOTHYROIDISM	HP_PITUITARY_HYPOTHYROIDISM		20	0.609496	1.59753	0.031746	0.0759008	1	1773	tags=40%, list=15%, signal=47%
HP_BEAKING_OF_VERTEBRAL_BODIES	HP_BEAKING_OF_VERTEBRAL_BODIES		21	0.613677	1.59704	0.0301418	0.0761476	1	758	tags=19%, list=6%, signal=20%
HP_NAIL_DYSPLASIA	HP_NAIL_DYSPLASIA		113	0.446325	1.59647	0.0057554	0.0764301	1	2610	tags=40%, list=22%, signal=51%
GOCC_CILIARY_MEMBRANE	GOCC_CILIARY_MEMBRANE		39	0.52159	1.59622	0.0310966	0.0765263	1	2386	tags=36%, list=20%, signal=45%
HP_RECTAL_FISTULA	HP_RECTAL_FISTULA		15	0.643766	1.59567	0.0336283	0.0768261	1	233	tags=13%, list=2%, signal=14%
GOBP_REGULATION_OF_MYELOID_LEUKOCYTE_DIFFERENTIATION	GOBP_REGULATION_OF_MYELOID_LEUKOCYTE_DIFFERENTIATION		80	0.472132	1.5956	0.00903614	0.0767947	1	906	tags=19%, list=8%, signal=20%
HP_APLASIA_HYPOPLASIA_INVOLVING_THE_VERTEBRAL_COLUMN	HP_APLASIA_HYPOPLASIA_INVOLVING_THE_VERTEBRAL_COLUMN		51	0.501082	1.59554	0.0124417	0.0767726	1	1047	tags=22%, list=9%, signal=24%
HP_INTESTINAL_FISTULA	HP_INTESTINAL_FISTULA		19	0.619125	1.59517	0.0349418	0.0769225	1	233	tags=11%, list=2%, signal=11%
GSE28737_FOLLICULAR_VS_MARGINAL_ZONE_BCELL_BCL6_HET_DN	GSE28737_FOLLICULAR_VS_MARGINAL_ZONE_BCELL_BCL6_HET_DN		142	0.428549	1.59487	0	0.0770481	1	1814	tags=24%, list=15%, signal=28%
ALK_DN.V1_UP	ALK_DN.V1_UP		89	0.4596	1.59463	0.00928793	0.077135	1	1030	tags=29%, list=9%, signal=32%
GOBP_REGULATION_OF_MACROPHAGE_ACTIVATION	GOBP_REGULATION_OF_MACROPHAGE_ACTIVATION		43	0.520212	1.59455	0.0266041	0.0771099	1	1488	tags=28%, list=13%, signal=32%
HP_THORACOLUMBAR_SCOLIOSIS	HP_THORACOLUMBAR_SCOLIOSIS		23	0.597135	1.5945	0.027027	0.0770675	1	800	tags=35%, list=7%, signal=37%
HP_PROMINENT_SUPERFICIAL_BLOOD_VESSELS	HP_PROMINENT_SUPERFICIAL_BLOOD_VESSELS		24	0.582497	1.59445	0.024055	0.0770251	1	1415	tags=42%, list=12%, signal=47%
GOBP_REGULATION_OF_BICELLULAR_TIGHT_JUNCTION_ASSEMBLY	GOBP_REGULATION_OF_BICELLULAR_TIGHT_JUNCTION_ASSEMBLY		20	0.600303	1.59401	0.0415162	0.0772715	1	685	tags=25%, list=6%, signal=26%
GOBP_NEPHRON_DEVELOPMENT	GOBP_NEPHRON_DEVELOPMENT		88	0.459165	1.59364	0.0089153	0.0774356	1	1760	tags=44%, list=15%, signal=52%
GOBP_POSTSYNAPSE_ASSEMBLY	GOBP_POSTSYNAPSE_ASSEMBLY		16	0.636217	1.59298	0.0262295	0.0777816	1	662	tags=44%, list=6%, signal=46%
GOBP_ANTIMICROBIAL_HUMORAL_IMMUNE_RESPONSE_MEDIATED_BY_ANTIMICROBIAL_PEPTIDE	GOBP_ANTIMICROBIAL_HUMORAL_IMMUNE_RESPONSE_MEDIATED_BY_ANTIMICROBIAL_PEPTIDE		18	0.616435	1.59275	0.0230906	0.0778537	1	1690	tags=50%, list=14%, signal=58%
GSE28737_WT_VS_BCL6_KO_MARGINAL_ZONE_BCELL_UP	GSE28737_WT_VS_BCL6_KO_MARGINAL_ZONE_BCELL_UP		117	0.439905	1.59257	0.00286944	0.0779017	1	1894	tags=31%, list=16%, signal=36%
GOBP_CELL_PART_MORPHOGENESIS	GOBP_CELL_PART_MORPHOGENESIS		480	0.381412	1.59226	0	0.0780324	1	1937	tags=27%, list=16%, signal=31%
GOBP_POSITIVE_REGULATION_OF_WNT_SIGNALING_PATHWAY	GOBP_POSITIVE_REGULATION_OF_WNT_SIGNALING_PATHWAY		144	0.441102	1.59222	0.00437318	0.0779803	1	1162	tags=19%, list=10%, signal=21%
GSE13306_RA_VS_UNTREATED_TREG_DN	GSE13306_RA_VS_UNTREATED_TREG_DN		130	0.431522	1.59214	0.00278164	0.0779728	1	2394	tags=32%, list=20%, signal=40%
GSE10325_BCELL_VS_MYELOID_DN	GSE10325_BCELL_VS_MYELOID_DN		156	0.425049	1.59194	0	0.0780425	1	2586	tags=40%, list=22%, signal=50%
GSE15659_NAIVE_CD4_TCELL_VS_NONSUPPRESSIVE_TCELL_UP	GSE15659_NAIVE_CD4_TCELL_VS_NONSUPPRESSIVE_TCELL_UP		122	0.436438	1.59182	0.00296296	0.0780512	1	978	tags=15%, list=8%, signal=16%
GOBP_TUBE_FORMATION	GOBP_TUBE_FORMATION		102	0.454921	1.59181	0.00582242	0.0779776	1	1441	tags=25%, list=12%, signal=29%
HP_APLASIA_HYPOPLASIA_OF_THE_SKIN	HP_APLASIA_HYPOPLASIA_OF_THE_SKIN		142	0.430798	1.5916	0.001443	0.0780577	1	1913	tags=30%, list=16%, signal=36%
GOBP_NEGATIVE_REGULATION_OF_ENDOTHELIAL_CELL_PROLIFERATION	GOBP_NEGATIVE_REGULATION_OF_ENDOTHELIAL_CELL_PROLIFERATION		30	0.556596	1.5916	0.0273973	0.0779851	1	2656	tags=57%, list=22%, signal=73%
GOBP_GLIAL_CELL_DIFFERENTIATION	GOBP_GLIAL_CELL_DIFFERENTIATION		144	0.42549	1.59115	0.00278164	0.0781998	1	1170	tags=24%, list=10%, signal=27%
HP_WORMIAN_BONES	HP_WORMIAN_BONES		39	0.529373	1.59084	0.0299685	0.0783518	1	1804	tags=38%, list=15%, signal=45%
HP_BILATERAL_PTOSIS	HP_BILATERAL_PTOSIS		30	0.553243	1.59061	0.0205047	0.0784314	1	1203	tags=23%, list=10%, signal=26%
HP_ABNORMALITY_OF_THE_ALVEOLAR_RIDGES	HP_ABNORMALITY_OF_THE_ALVEOLAR_RIDGES		33	0.539753	1.59039	0.0238095	0.07852	1	2146	tags=39%, list=18%, signal=48%
GOBP_FIBROBLAST_PROLIFERATION	GOBP_FIBROBLAST_PROLIFERATION		62	0.483217	1.59039	0.00918836	0.0784482	1	1436	tags=31%, list=12%, signal=35%
GSE21380_TFH_VS_GERMINAL_CENTER_TFH_CD4_TCELL_UP	GSE21380_TFH_VS_GERMINAL_CENTER_TFH_CD4_TCELL_UP		143	0.426322	1.59011	0.00290276	0.0785572	1	2222	tags=42%, list=19%, signal=51%
HP_ABNORMAL_METACARPAL_MORPHOLOGY	HP_ABNORMAL_METACARPAL_MORPHOLOGY		126	0.436525	1.59001	0.00297619	0.0785429	1	1615	tags=29%, list=14%, signal=33%
HP_JOINT_CONTRACTURE_OF_THE_HAND	HP_JOINT_CONTRACTURE_OF_THE_HAND		171	0.418045	1.58992	0.00567376	0.0785467	1	1618	tags=25%, list=14%, signal=28%
GOBP_REGULATION_OF_SECRETION	GOBP_REGULATION_OF_SECRETION		373	0.390443	1.58987	0	0.0785038	1	2011	tags=28%, list=17%, signal=33%
GOBP_NEGATIVE_REGULATION_OF_LIPID_BIOSYNTHETIC_PROCESS	GOBP_NEGATIVE_REGULATION_OF_LIPID_BIOSYNTHETIC_PROCESS		35	0.540681	1.58931	0.0255102	0.0788072	1	1416	tags=31%, list=12%, signal=36%
HP_ABNORMAL_CLAVICLE_MORPHOLOGY	HP_ABNORMAL_CLAVICLE_MORPHOLOGY		86	0.463765	1.58875	0.00766871	0.0791163	1	2229	tags=36%, list=19%, signal=44%
GOBP_HEART_VALVE_DEVELOPMENT	GOBP_HEART_VALVE_DEVELOPMENT		52	0.495267	1.5887	0.0185759	0.0790847	1	1596	tags=50%, list=14%, signal=58%
HP_ABNORMAL_HYPOTHALAMUS_PHYSIOLOGY	HP_ABNORMAL_HYPOTHALAMUS_PHYSIOLOGY		30	0.550129	1.5881	0.0411862	0.0794237	1	1687	tags=43%, list=14%, signal=50%
GSE26912_TUMORICIDAL_VS_CTRL_MACROPHAGE_UP	GSE26912_TUMORICIDAL_VS_CTRL_MACROPHAGE_UP		162	0.421116	1.58751	0.00546448	0.07975	1	1899	tags=36%, list=16%, signal=42%
GSE32423_MEMORY_VS_NAIVE_CD8_TCELL_UP	GSE32423_MEMORY_VS_NAIVE_CD8_TCELL_UP		140	0.429139	1.58748	0.00698324	0.0796982	1	1625	tags=31%, list=14%, signal=35%
GOBP_SYNAPSE_ASSEMBLY	GOBP_SYNAPSE_ASSEMBLY		95	0.452888	1.58722	0.0101156	0.0798022	1	1794	tags=37%, list=15%, signal=43%
GOBP_SENSORY_PERCEPTION_OF_PAIN	GOBP_SENSORY_PERCEPTION_OF_PAIN		50	0.50238	1.58721	0.010989	0.0797309	1	1736	tags=34%, list=15%, signal=40%
GSE29949_MICROGLIA_VS_DC_BRAIN_UP	GSE29949_MICROGLIA_VS_DC_BRAIN_UP		155	0.423352	1.58697	0.00433526	0.0797957	1	1689	tags=23%, list=14%, signal=26%
GOBP_NEUROBLAST_PROLIFERATION	GOBP_NEUROBLAST_PROLIFERATION		37	0.529494	1.58677	0.0213465	0.0798674	1	2645	tags=49%, list=22%, signal=62%
HP_ANKLE_FLEXION_CONTRACTURE	HP_ANKLE_FLEXION_CONTRACTURE		33	0.541103	1.58646	0.0288625	0.0799992	1	1704	tags=39%, list=14%, signal=46%
HP_ABNORMAL_CRANIAL_NERVE_MORPHOLOGY	HP_ABNORMAL_CRANIAL_NERVE_MORPHOLOGY		195	0.409765	1.58601	0.00132275	0.0802317	1	1689	tags=22%, list=14%, signal=25%
GOBP_TRANSFORMING_GROWTH_FACTOR_BETA_PRODUCTION	GOBP_TRANSFORMING_GROWTH_FACTOR_BETA_PRODUCTION		28	0.567015	1.58592	0.0252101	0.080224	1	2005	tags=46%, list=17%, signal=56%
HP_JOINT_CONTRACTURES_INVOLVING_THE_JOINTS_OF_THE_FEET	HP_JOINT_CONTRACTURES_INVOLVING_THE_JOINTS_OF_THE_FEET		20	0.603216	1.58567	0.0511073	0.0803331	1	1704	tags=40%, list=14%, signal=47%
GOBP_CENTRAL_NERVOUS_SYSTEM_NEURON_DEVELOPMENT	GOBP_CENTRAL_NERVOUS_SYSTEM_NEURON_DEVELOPMENT		52	0.509757	1.5851	0.0145161	0.0806655	1	1814	tags=38%, list=15%, signal=45%
HP_DISTAL_LOWER_LIMB_MUSCLE_WEAKNESS	HP_DISTAL_LOWER_LIMB_MUSCLE_WEAKNESS		40	0.506211	1.5848	0.020934	0.0808004	1	1956	tags=35%, list=17%, signal=42%
GSE14413_UNSTIM_VS_IFNB_STIM_RAW264_CELLS_UP	GSE14413_UNSTIM_VS_IFNB_STIM_RAW264_CELLS_UP		91	0.458133	1.58448	0.00460123	0.0809475	1	1712	tags=31%, list=14%, signal=36%
GSE24574_NAIVE_VS_TCONV_CD4_TCELL_UP	GSE24574_NAIVE_VS_TCONV_CD4_TCELL_UP		135	0.430914	1.58431	0.00715308	0.0809849	1	1940	tags=31%, list=16%, signal=37%
HP_ABNORMAL_FEMORAL_NECK_HEAD_MORPHOLOGY	HP_ABNORMAL_FEMORAL_NECK_HEAD_MORPHOLOGY		135	0.435022	1.58406	0.00434783	0.0811139	1	2181	tags=29%, list=18%, signal=35%
HP_ULNAR_DEVIATION_OF_THE_HAND_OR_OF_FINGERS_OF_THE_HAND	HP_ULNAR_DEVIATION_OF_THE_HAND_OR_OF_FINGERS_OF_THE_HAND		31	0.54272	1.58405	0.0330033	0.0810431	1	992	tags=19%, list=8%, signal=21%
GSE43955_1H_VS_60H_ACT_CD4_TCELL_UP	GSE43955_1H_VS_60H_ACT_CD4_TCELL_UP		165	0.423764	1.584	0.00140056	0.0809969	1	1760	tags=24%, list=15%, signal=27%
HP_LIMITED_ELBOW_MOVEMENT	HP_LIMITED_ELBOW_MOVEMENT		92	0.457253	1.58384	0.00900901	0.0810299	1	1336	tags=29%, list=11%, signal=33%
GOBP_RETINA_DEVELOPMENT_IN_CAMERA_TYPE_EYE	GOBP_RETINA_DEVELOPMENT_IN_CAMERA_TYPE_EYE		92	0.452373	1.58375	0.01059	0.0810347	1	1987	tags=33%, list=17%, signal=39%
GSE27241_WT_VS_RORGT_KO_TH17_POLARIZED_CD4_TCELL_TREATED_WITH_DIGOXIN_DN	GSE27241_WT_VS_RORGT_KO_TH17_POLARIZED_CD4_TCELL_TREATED_WITH_DIGOXIN_DN		134	0.427412	1.58347	0.00292398	0.0811597	1	2649	tags=38%, list=22%, signal=49%
GSE360_CTRL_VS_L_DONOVANI_DC_DN	GSE360_CTRL_VS_L_DONOVANI_DC_DN		140	0.435796	1.58317	0.00436681	0.081301	1	1362	tags=25%, list=12%, signal=28%
HP_ABNORMALITY_OF_BLOOD_VOLUME_HOMEOSTASIS	HP_ABNORMALITY_OF_BLOOD_VOLUME_HOMEOSTASIS		19	0.61086	1.58311	0.0253165	0.081275	1	1040	tags=26%, list=9%, signal=29%
BCAT_GDS748_UP	BCAT_GDS748_UP		38	0.526995	1.5823	0.0103806	0.0817383	1	2191	tags=42%, list=19%, signal=52%
HALLMARK_XENOBIOTIC_METABOLISM	HALLMARK_XENOBIOTIC_METABOLISM		135	0.434461	1.58212	0.00421941	0.0817774	1	1606	tags=24%, list=14%, signal=27%
HP_ASPIRATION_PNEUMONIA	HP_ASPIRATION_PNEUMONIA		41	0.52737	1.58197	0.0192308	0.0817937	1	1242	tags=29%, list=11%, signal=33%
GOBP_POSITIVE_REGULATION_OF_CELL_ADHESION	GOBP_POSITIVE_REGULATION_OF_CELL_ADHESION		337	0.390252	1.58157	0	0.0819929	1	1977	tags=29%, list=17%, signal=34%
GOBP_ERK1_AND_ERK2_CASCADE	GOBP_ERK1_AND_ERK2_CASCADE		202	0.410457	1.58119	0.00133511	0.0821692	1	1942	tags=30%, list=16%, signal=36%
HP_PERIPHERAL_ARTERIAL_STENOSIS	HP_PERIPHERAL_ARTERIAL_STENOSIS		22	0.574048	1.5811	0.0237691	0.0821556	1	1040	tags=32%, list=9%, signal=35%
GOBP_REGULATION_OF_CELLULAR_RESPONSE_TO_VASCULAR_ENDOTHELIAL_GROWTH_FACTOR_STIMULUS	GOBP_REGULATION_OF_CELLULAR_RESPONSE_TO_VASCULAR_ENDOTHELIAL_GROWTH_FACTOR_STIMULUS		19	0.601336	1.58063	0.0325342	0.0824176	1	1853	tags=47%, list=16%, signal=56%
GOBP_REGULATION_OF_SUBSTRATE_ADHESION_DEPENDENT_CELL_SPREADING	GOBP_REGULATION_OF_SUBSTRATE_ADHESION_DEPENDENT_CELL_SPREADING		48	0.502645	1.58018	0.0205696	0.0826658	1	1893	tags=33%, list=16%, signal=40%
GSE5589_WT_VS_IL10_KO_LPS_STIM_MACROPHAGE_180MIN_DN	GSE5589_WT_VS_IL10_KO_LPS_STIM_MACROPHAGE_180MIN_DN		110	0.443946	1.58017	0.00291971	0.0826049	1	1455	tags=30%, list=12%, signal=34%
HP_ABNORMALITY_OF_SKELETAL_MUSCLE_FIBER_SIZE	HP_ABNORMALITY_OF_SKELETAL_MUSCLE_FIBER_SIZE		43	0.515587	1.58013	0.0158228	0.0825503	1	1748	tags=33%, list=15%, signal=38%
HP_SEROSITIS	HP_SEROSITIS		26	0.573105	1.58007	0.040404	0.0825156	1	847	tags=31%, list=7%, signal=33%
GOBP_NEGATIVE_REGULATION_OF_INFLAMMATORY_RESPONSE	GOBP_NEGATIVE_REGULATION_OF_INFLAMMATORY_RESPONSE		85	0.463063	1.57969	0.00911854	0.0826704	1	2645	tags=45%, list=22%, signal=57%
GOMF_L_ASCORBIC_ACID_BINDING	GOMF_L_ASCORBIC_ACID_BINDING		18	0.615064	1.5792	0.0310881	0.0829526	1	3118	tags=72%, list=26%, signal=98%
HP_PELVIC_GIRDLE_MUSCLE_WEAKNESS	HP_PELVIC_GIRDLE_MUSCLE_WEAKNESS		22	0.59523	1.57914	0.0282862	0.0829264	1	951	tags=23%, list=8%, signal=25%
GCNP_SHH_UP_EARLY.V1_DN	GCNP_SHH_UP_EARLY.V1_DN		118	0.431839	1.57839	0.00284091	0.0834098	1	2391	tags=31%, list=20%, signal=39%
HP_NEPHRITIS	HP_NEPHRITIS		49	0.508854	1.57796	0.0208333	0.0836528	1	2332	tags=43%, list=20%, signal=53%
GOBP_EPITHELIAL_TUBE_BRANCHING_INVOLVED_IN_LUNG_MORPHOGENESIS	GOBP_EPITHELIAL_TUBE_BRANCHING_INVOLVED_IN_LUNG_MORPHOGENESIS		20	0.590726	1.57788	0.026936	0.0836354	1	2643	tags=50%, list=22%, signal=64%
HP_ABNORMAL_DURA_MATER_MORPHOLOGY	HP_ABNORMAL_DURA_MATER_MORPHOLOGY		16	0.627505	1.57726	0.0314233	0.0840205	1	1623	tags=63%, list=14%, signal=72%
GOBP_POSITIVE_REGULATION_OF_NERVOUS_SYSTEM_DEVELOPMENT	GOBP_POSITIVE_REGULATION_OF_NERVOUS_SYSTEM_DEVELOPMENT		185	0.412632	1.57709	0	0.0840528	1	1206	tags=23%, list=10%, signal=25%
GOBP_CELL_JUNCTION_MAINTENANCE	GOBP_CELL_JUNCTION_MAINTENANCE		21	0.58639	1.57703	0.0402802	0.0840136	1	2063	tags=48%, list=17%, signal=58%
HP_BLADDER_DIVERTICULUM	HP_BLADDER_DIVERTICULUM		18	0.632063	1.57692	0.0333333	0.0840335	1	1071	tags=44%, list=9%, signal=49%
GOMF_EPIDERMAL_GROWTH_FACTOR_RECEPTOR_BINDING	GOMF_EPIDERMAL_GROWTH_FACTOR_RECEPTOR_BINDING		25	0.57637	1.57678	0.0349908	0.0840595	1	456	tags=24%, list=4%, signal=25%
GSE26488_WT_VS_HDAC7_DELTAP_TG_OT2_THYMOCYTE_WITH_PEPTIDE_INJECTION_DN	GSE26488_WT_VS_HDAC7_DELTAP_TG_OT2_THYMOCYTE_WITH_PEPTIDE_INJECTION_DN		163	0.421573	1.57671	0.00141443	0.0840333	1	1580	tags=25%, list=13%, signal=28%
HP_ARTERIOSCLEROSIS	HP_ARTERIOSCLEROSIS		65	0.473529	1.57658	0.0145867	0.0840422	1	1989	tags=31%, list=17%, signal=37%
HP_JOINT_STIFFNESS	HP_JOINT_STIFFNESS		137	0.426407	1.57629	0.00426136	0.0841655	1	1065	tags=20%, list=9%, signal=21%
GOBP_EPITHELIAL_TUBE_FORMATION	GOBP_EPITHELIAL_TUBE_FORMATION		92	0.456741	1.57616	0.00465116	0.0841734	1	1441	tags=25%, list=12%, signal=28%
GSE9006_1MONTH_VS_4MONTH_POST_TYPE_1_DIABETES_DX_PBMC_UP	GSE9006_1MONTH_VS_4MONTH_POST_TYPE_1_DIABETES_DX_PBMC_UP		146	0.423317	1.57601	0.00574713	0.0842221	1	2589	tags=33%, list=22%, signal=42%
HP_ABNORMAL_PLEURA_MORPHOLOGY	HP_ABNORMAL_PLEURA_MORPHOLOGY		61	0.487641	1.5758	0.0158983	0.0843118	1	1967	tags=31%, list=17%, signal=37%
HP_ABNORMALITY_OF_UPPER_LIMB_JOINT	HP_ABNORMALITY_OF_UPPER_LIMB_JOINT		348	0.387264	1.5757	0	0.0842939	1	1618	tags=23%, list=14%, signal=26%
GSE21360_PRIMARY_VS_QUATERNARY_MEMORY_CD8_TCELL_UP	GSE21360_PRIMARY_VS_QUATERNARY_MEMORY_CD8_TCELL_UP		150	0.422196	1.57564	0.0027248	0.0842522	1	2436	tags=33%, list=21%, signal=41%
GOBP_SEX_DIFFERENTIATION	GOBP_SEX_DIFFERENTIATION		159	0.420233	1.57539	0.00144509	0.0843518	1	1651	tags=28%, list=14%, signal=32%
HOEK_MYELOID_DENDRITIC_CELL_2011_2012_TIV_ADULT_7DY_UP	HOEK_MYELOID_DENDRITIC_CELL_2011_2012_TIV_ADULT_7DY_UP		17	0.621995	1.57491	0.0465517	0.0846327	1	1591	tags=47%, list=13%, signal=54%
GSE3982_EOSINOPHIL_VS_NEUTROPHIL_DN	GSE3982_EOSINOPHIL_VS_NEUTROPHIL_DN		139	0.424937	1.57479	0.00289017	0.0846359	1	1736	tags=23%, list=15%, signal=27%
HP_JOINT_LAXITY	HP_JOINT_LAXITY		164	0.414349	1.57475	0.00415512	0.0845958	1	1989	tags=26%, list=17%, signal=31%
GOBP_MUSCLE_CELL_DEVELOPMENT	GOBP_MUSCLE_CELL_DEVELOPMENT		111	0.437664	1.57457	0.00300752	0.08466	1	1261	tags=23%, list=11%, signal=25%
GSE3982_MAC_VS_BCELL_UP	GSE3982_MAC_VS_BCELL_UP		158	0.416242	1.57457	0.0027933	0.0845852	1	1987	tags=24%, list=17%, signal=29%
GSE37301_CD4_TCELL_VS_RAG2_KO_NK_CELL_UP	GSE37301_CD4_TCELL_VS_RAG2_KO_NK_CELL_UP		114	0.434223	1.57453	0.00438597	0.0845428	1	3036	tags=46%, list=26%, signal=61%
GSE3039_NKT_CELL_VS_ALPHAALPHA_CD8_TCELL_UP	GSE3039_NKT_CELL_VS_ALPHAALPHA_CD8_TCELL_UP		164	0.422789	1.57347	0.00411523	0.0852429	1	1051	tags=18%, list=9%, signal=19%
GSE24142_EARLY_THYMIC_PROGENITOR_VS_DN3_THYMOCYTE_UP	GSE24142_EARLY_THYMIC_PROGENITOR_VS_DN3_THYMOCYTE_UP		167	0.417186	1.57344	0	0.0851915	1	2155	tags=31%, list=18%, signal=38%
GOCC_CELL_SUBSTRATE_JUNCTION	GOCC_CELL_SUBSTRATE_JUNCTION		366	0.384055	1.57328	0.00125313	0.0852363	1	2356	tags=32%, list=20%, signal=39%
HP_APLASIA_HYPOPLASIA_OF_THE_DISTAL_PHALANGES_OF_THE_HAND	HP_APLASIA_HYPOPLASIA_OF_THE_DISTAL_PHALANGES_OF_THE_HAND		110	0.442164	1.57318	0.00440529	0.0852414	1	1652	tags=24%, list=14%, signal=27%
GSE5099_CLASSICAL_M1_VS_ALTERNATIVE_M2_MACROPHAGE_DN	GSE5099_CLASSICAL_M1_VS_ALTERNATIVE_M2_MACROPHAGE_DN		104	0.448649	1.5725	0.00456621	0.0856624	1	840	tags=19%, list=7%, signal=21%
GSE24634_TEFF_VS_TCONV_DAY10_IN_CULTURE_DN	GSE24634_TEFF_VS_TCONV_DAY10_IN_CULTURE_DN		167	0.411919	1.57173	0.00273598	0.0861809	1	1770	tags=26%, list=15%, signal=31%
GSE21546_UNSTIM_VS_ANTI_CD3_STIM_SAP1A_KO_DP_THYMOCYTES_UP	GSE21546_UNSTIM_VS_ANTI_CD3_STIM_SAP1A_KO_DP_THYMOCYTES_UP		146	0.419832	1.57152	0.00143266	0.0862533	1	1049	tags=18%, list=9%, signal=20%
GOBP_SMOOTHENED_SIGNALING_PATHWAY	GOBP_SMOOTHENED_SIGNALING_PATHWAY		104	0.443671	1.57137	0.0075188	0.086302	1	2384	tags=31%, list=20%, signal=38%
GOBP_RESPONSE_TO_VITAMIN	GOBP_RESPONSE_TO_VITAMIN		62	0.480014	1.57125	0.016129	0.0863128	1	1416	tags=32%, list=12%, signal=36%
HP_MITRAL_VALVE_PROLAPSE	HP_MITRAL_VALVE_PROLAPSE		73	0.46592	1.5708	0.0138462	0.0865768	1	2311	tags=40%, list=20%, signal=49%
GOBP_REGULATION_OF_STEROL_TRANSPORT	GOBP_REGULATION_OF_STEROL_TRANSPORT		34	0.53946	1.5706	0.0377049	0.0866746	1	928	tags=29%, list=8%, signal=32%
GOMF_ORGANIC_ACID_BINDING	GOMF_ORGANIC_ACID_BINDING		65	0.472005	1.57025	0.0141509	0.0868716	1	1958	tags=40%, list=17%, signal=48%
GOBP_REGULATION_OF_NEUTROPHIL_MIGRATION	GOBP_REGULATION_OF_NEUTROPHIL_MIGRATION		37	0.530684	1.57016	0.0258065	0.0868778	1	1813	tags=32%, list=15%, signal=38%
GSE36888_UNTREATED_VS_IL2_TREATED_STAT5_AB_KNOCKIN_TCELL_2H_UP	GSE36888_UNTREATED_VS_IL2_TREATED_STAT5_AB_KNOCKIN_TCELL_2H_UP		155	0.417136	1.56967	0.0013986	0.0871754	1	1626	tags=25%, list=14%, signal=29%
GOBP_ERBB2_SIGNALING_PATHWAY	GOBP_ERBB2_SIGNALING_PATHWAY		23	0.579716	1.56957	0.030303	0.0871762	1	283	tags=22%, list=2%, signal=22%
GSE21546_UNSTIM_VS_ANTI_CD3_STIM_ELK1_KO_DP_THYMOCYTES_DN	GSE21546_UNSTIM_VS_ANTI_CD3_STIM_ELK1_KO_DP_THYMOCYTES_DN		102	0.444754	1.56928	0.00447094	0.0873221	1	1776	tags=26%, list=15%, signal=31%
ESC_J1_UP_EARLY.V1_UP	ESC_J1_UP_EARLY.V1_UP		119	0.432509	1.56919	0.00573888	0.0873119	1	2637	tags=38%, list=22%, signal=48%
HP_ABNORMALITY_OF_THE_METACARPAL_BONES	HP_ABNORMALITY_OF_THE_METACARPAL_BONES		157	0.421698	1.56917	0.0013986	0.0872527	1	1809	tags=30%, list=15%, signal=35%
GOBP_POSITIVE_REGULATION_OF_MEMBRANE_PROTEIN_ECTODOMAIN_PROTEOLYSIS	GOBP_POSITIVE_REGULATION_OF_MEMBRANE_PROTEIN_ECTODOMAIN_PROTEOLYSIS		15	0.641931	1.56894	0.0259516	0.0873367	1	2570	tags=60%, list=22%, signal=77%
GOBP_REACTIVE_OXYGEN_SPECIES_METABOLIC_PROCESS	GOBP_REACTIVE_OXYGEN_SPECIES_METABOLIC_PROCESS		184	0.410047	1.56852	0	0.0875541	1	1821	tags=25%, list=15%, signal=29%
GSE12003_4D_VS_8D_CULTURE_MIR223_KO_BM_PROGENITOR_UP	GSE12003_4D_VS_8D_CULTURE_MIR223_KO_BM_PROGENITOR_UP		76	0.461519	1.56836	0.0119048	0.0875994	1	1715	tags=37%, list=15%, signal=43%
GSE36476_YOUNG_VS_OLD_DONOR_MEMORY_CD4_TCELL_DN	GSE36476_YOUNG_VS_OLD_DONOR_MEMORY_CD4_TCELL_DN		97	0.445607	1.56811	0.0100865	0.0877185	1	1730	tags=28%, list=15%, signal=32%
GOBP_APOPTOTIC_CELL_CLEARANCE	GOBP_APOPTOTIC_CELL_CLEARANCE		36	0.527304	1.5681	0.0206349	0.0876427	1	1258	tags=28%, list=11%, signal=31%
GOBP_SYNAPTONEMAL_COMPLEX_ORGANIZATION	GOBP_SYNAPTONEMAL_COMPLEX_ORGANIZATION		16	0.6108	1.56797	0.035524	0.0876539	1	481	tags=19%, list=4%, signal=20%
GSE4748_CTRL_VS_LPS_AND_CYANOBACTERIUM_LPSLIKE_STIM_DC_3H_UP	GSE4748_CTRL_VS_LPS_AND_CYANOBACTERIUM_LPSLIKE_STIM_DC_3H_UP		170	0.41263	1.56638	0.00554785	0.0888028	1	2025	tags=31%, list=17%, signal=37%
GSE17721_0.5H_VS_24H_CPG_BMDC_UP	GSE17721_0.5H_VS_24H_CPG_BMDC_UP		161	0.419737	1.56633	0.00138504	0.0887617	1	2093	tags=30%, list=18%, signal=36%
GOCC_RECEPTOR_COMPLEX	GOCC_RECEPTOR_COMPLEX		265	0.393944	1.56622	0	0.088767	1	1964	tags=36%, list=17%, signal=42%
GOBP_RESPONSE_TO_FUNGUS	GOBP_RESPONSE_TO_FUNGUS		26	0.558461	1.56595	0.0358891	0.0888966	1	1111	tags=31%, list=9%, signal=34%
KRAS.600_UP.V1_UP	KRAS.600_UP.V1_UP		151	0.417926	1.56545	0.00137931	0.0892222	1	1826	tags=37%, list=15%, signal=43%
GOBP_CHONDROITIN_SULFATE_PROTEOGLYCAN_BIOSYNTHETIC_PROCESS	GOBP_CHONDROITIN_SULFATE_PROTEOGLYCAN_BIOSYNTHETIC_PROCESS		21	0.579918	1.56544	0.0505415	0.0891513	1	2035	tags=43%, list=17%, signal=52%
HP_ABNORMALITY_OF_DENTAL_ERUPTION	HP_ABNORMALITY_OF_DENTAL_ERUPTION		175	0.415904	1.5653	0	0.089175	1	2300	tags=31%, list=19%, signal=38%
GOBP_PYRIDINE_CONTAINING_COMPOUND_METABOLIC_PROCESS	GOBP_PYRIDINE_CONTAINING_COMPOUND_METABOLIC_PROCESS		27	0.560669	1.56512	0.0265781	0.0892359	1	118	tags=11%, list=1%, signal=11%
HP_MYOTONIA	HP_MYOTONIA		21	0.587191	1.56502	0.0384615	0.0892301	1	3065	tags=52%, list=26%, signal=71%
GSE17721_PAM3CSK4_VS_CPG_1H_BMDC_DN	GSE17721_PAM3CSK4_VS_CPG_1H_BMDC_DN		159	0.414466	1.56478	0	0.0893285	1	1200	tags=17%, list=10%, signal=19%
GSE2770_IL12_AND_TGFB_VS_IL4_TREATED_ACT_CD4_TCELL_6H_DN	GSE2770_IL12_AND_TGFB_VS_IL4_TREATED_ACT_CD4_TCELL_6H_DN		118	0.432698	1.56471	0.00884956	0.0892947	1	1574	tags=31%, list=13%, signal=36%
GOBP_MATERNAL_PROCESS_INVOLVED_IN_FEMALE_PREGNANCY	GOBP_MATERNAL_PROCESS_INVOLVED_IN_FEMALE_PREGNANCY		36	0.533422	1.56466	0.0220339	0.0892536	1	2054	tags=44%, list=17%, signal=54%
GOBP_TRABECULA_FORMATION	GOBP_TRABECULA_FORMATION		15	0.651338	1.56463	0.04	0.0892142	1	455	tags=40%, list=4%, signal=42%
GOBP_REGULATION_OF_CELL_ADHESION_MEDIATED_BY_INTEGRIN	GOBP_REGULATION_OF_CELL_ADHESION_MEDIATED_BY_INTEGRIN		42	0.501893	1.56461	0.0195759	0.0891552	1	1416	tags=31%, list=12%, signal=35%
GSE27670_CTRL_VS_BLIMP1_TRANSDUCED_GC_BCELL_DN	GSE27670_CTRL_VS_BLIMP1_TRANSDUCED_GC_BCELL_DN		161	0.420061	1.56437	0.00417827	0.0892793	1	1696	tags=27%, list=14%, signal=31%
GOBP_REGULATION_OF_MAP_KINASE_ACTIVITY	GOBP_REGULATION_OF_MAP_KINASE_ACTIVITY		239	0.39626	1.56408	0.00135685	0.0894204	1	2017	tags=28%, list=17%, signal=33%
GSE30971_CTRL_VS_LPS_STIM_MACROPHAGE_WBP7_KO_2H_UP	GSE30971_CTRL_VS_LPS_STIM_MACROPHAGE_WBP7_KO_2H_UP		143	0.424364	1.56393	0.00564175	0.0894511	1	1798	tags=23%, list=15%, signal=27%
GSE15659_CD45RA_NEG_CD4_TCELL_VS_NONSUPPRESSIVE_TCELL_UP	GSE15659_CD45RA_NEG_CD4_TCELL_VS_NONSUPPRESSIVE_TCELL_UP		113	0.436324	1.56356	0.0030303	0.0896651	1	2027	tags=22%, list=17%, signal=26%
GSE21360_NAIVE_VS_SECONDARY_MEMORY_CD8_TCELL_UP	GSE21360_NAIVE_VS_SECONDARY_MEMORY_CD8_TCELL_UP		158	0.419477	1.56323	0.0013624	0.0898501	1	1974	tags=29%, list=17%, signal=34%
GOBP_REGULATION_OF_EPITHELIAL_CELL_DIFFERENTIATION	GOBP_REGULATION_OF_EPITHELIAL_CELL_DIFFERENTIATION		95	0.447596	1.56306	0.00593472	0.0898933	1	1570	tags=35%, list=13%, signal=40%
GOBP_COLLAGEN_CATABOLIC_PROCESS	GOBP_COLLAGEN_CATABOLIC_PROCESS		28	0.553922	1.56285	0.0153584	0.0899886	1	1704	tags=54%, list=14%, signal=62%
GSE5589_IL6_KO_VS_IL10_KO_LPS_AND_IL10_STIM_MACROPHAGE_45MIN_UP	GSE5589_IL6_KO_VS_IL10_KO_LPS_AND_IL10_STIM_MACROPHAGE_45MIN_UP		157	0.418913	1.56274	0.0028169	0.0899869	1	1770	tags=29%, list=15%, signal=33%
GSE9006_HEALTHY_VS_TYPE_1_DIABETES_PBMC_AT_DX_DN	GSE9006_HEALTHY_VS_TYPE_1_DIABETES_PBMC_AT_DX_DN		149	0.417662	1.56235	0.00578035	0.0902092	1	1122	tags=18%, list=9%, signal=20%
HP_ABNORMALITY_OF_THE_TALUS	HP_ABNORMALITY_OF_THE_TALUS		40	0.518032	1.56228	0.0282392	0.0901889	1	749	tags=18%, list=6%, signal=19%
HP_ABNORMAL_SACRUM_MORPHOLOGY	HP_ABNORMAL_SACRUM_MORPHOLOGY		87	0.452813	1.56107	0.00764526	0.0910331	1	1588	tags=26%, list=13%, signal=30%
GOBP_EPITHELIAL_CELL_MORPHOGENESIS	GOBP_EPITHELIAL_CELL_MORPHOGENESIS		20	0.599279	1.56098	0.0344234	0.0910184	1	2406	tags=55%, list=20%, signal=69%
GSE21063_WT_VS_NFATC1_KO_16H_ANTI_IGM_STIM_BCELL_DN	GSE21063_WT_VS_NFATC1_KO_16H_ANTI_IGM_STIM_BCELL_DN		89	0.450555	1.56076	0.0123457	0.091096	1	1901	tags=34%, list=16%, signal=40%
AKT_UP_MTOR_DN.V1_DN	AKT_UP_MTOR_DN.V1_DN		137	0.42753	1.56053	0.00565771	0.0911984	1	1584	tags=28%, list=13%, signal=32%
GOCC_CONTRACTILE_FIBER	GOCC_CONTRACTILE_FIBER		143	0.419022	1.56038	0.00284091	0.0912306	1	2353	tags=34%, list=20%, signal=42%
HP_VAGINAL_FISTULA	HP_VAGINAL_FISTULA		16	0.628256	1.56027	0.0440141	0.0912449	1	233	tags=13%, list=2%, signal=13%
GOBP_REGULATION_OF_SMOOTH_MUSCLE_CONTRACTION	GOBP_REGULATION_OF_SMOOTH_MUSCLE_CONTRACTION		36	0.525299	1.56015	0.0280992	0.09126	1	1964	tags=39%, list=17%, signal=47%
HP_DELAYED_ERUPTION_OF_TEETH	HP_DELAYED_ERUPTION_OF_TEETH		136	0.425763	1.5595	0.0014245	0.0916664	1	2259	tags=32%, list=19%, signal=39%
GSE3982_BCELL_VS_EFF_MEMORY_CD4_TCELL_DN	GSE3982_BCELL_VS_EFF_MEMORY_CD4_TCELL_DN		124	0.430602	1.55895	0.00141243	0.0920393	1	2060	tags=35%, list=17%, signal=42%
GSE17721_PAM3CSK4_VS_GADIQUIMOD_2H_BMDC_UP	GSE17721_PAM3CSK4_VS_GADIQUIMOD_2H_BMDC_UP		128	0.432461	1.55885	0.00146843	0.0920472	1	2472	tags=36%, list=21%, signal=45%
GOBP_LEUKOCYTE_TETHERING_OR_ROLLING	GOBP_LEUKOCYTE_TETHERING_OR_ROLLING		22	0.590024	1.55858	0.0363322	0.0921651	1	1160	tags=41%, list=10%, signal=45%
GOBP_REGULATION_OF_PROTEOLYSIS	GOBP_REGULATION_OF_PROTEOLYSIS		488	0.375362	1.55855	0	0.0921103	1	1853	tags=22%, list=16%, signal=25%
HP_ABNORMAL_EPIPHYSEAL_OSSIFICATION	HP_ABNORMAL_EPIPHYSEAL_OSSIFICATION		39	0.509238	1.5581	0.0293638	0.0924004	1	1336	tags=21%, list=11%, signal=23%
GSE29618_BCELL_VS_MONOCYTE_DN	GSE29618_BCELL_VS_MONOCYTE_DN		173	0.417354	1.55801	0.00287356	0.0923984	1	1614	tags=20%, list=14%, signal=22%
ZAK_PBMC_MRKAD5_HIV_1_GAG_POL_NEF_AGE_20_50YO_AD5_NAB_TITERS_GT_200_VS_LTE_200_1DY_DN	ZAK_PBMC_MRKAD5_HIV_1_GAG_POL_NEF_AGE_20_50YO_AD5_NAB_TITERS_GT_200_VS_LTE_200_1DY_DN		71	0.468261	1.55781	0.00454545	0.0924733	1	2397	tags=38%, list=20%, signal=47%
GOBP_CARDIAC_SEPTUM_MORPHOGENESIS	GOBP_CARDIAC_SEPTUM_MORPHOGENESIS		48	0.48853	1.55771	0.0243112	0.0924697	1	1814	tags=50%, list=15%, signal=59%
GOBP_REGULATION_OF_PROTEIN_BINDING	GOBP_REGULATION_OF_PROTEIN_BINDING		154	0.417688	1.55759	0.00414938	0.0924965	1	1883	tags=26%, list=16%, signal=30%
GOBP_INSULIN_SECRETION	GOBP_INSULIN_SECRETION		128	0.426858	1.55731	0	0.0926356	1	991	tags=20%, list=8%, signal=22%
GOBP_REGULATION_OF_CARDIAC_MUSCLE_CELL_PROLIFERATION	GOBP_REGULATION_OF_CARDIAC_MUSCLE_CELL_PROLIFERATION		26	0.565054	1.55714	0.0448505	0.0926829	1	1596	tags=38%, list=14%, signal=44%
GSE37532_VISCERAL_ADIPOSE_TISSUE_VS_LN_DERIVED_PPARG_KO_TREG_CD4_TCELL_DN	GSE37532_VISCERAL_ADIPOSE_TISSUE_VS_LN_DERIVED_PPARG_KO_TREG_CD4_TCELL_DN		103	0.440727	1.55711	0.00864553	0.0926288	1	3011	tags=43%, list=25%, signal=57%
GSE36826_WT_VS_IL1R_KO_SKIN_STAPH_AUREUS_INF_DN	GSE36826_WT_VS_IL1R_KO_SKIN_STAPH_AUREUS_INF_DN		163	0.417052	1.55664	0.00137741	0.0928687	1	2671	tags=31%, list=23%, signal=40%
GOMF_PROTEIN_LIPID_COMPLEX_BINDING	GOMF_PROTEIN_LIPID_COMPLEX_BINDING		22	0.57625	1.55624	0.0271248	0.0931385	1	2534	tags=55%, list=21%, signal=69%
GSE21546_UNSTIM_VS_ANTI_CD3_STIM_DP_THYMOCYTES_UP	GSE21546_UNSTIM_VS_ANTI_CD3_STIM_DP_THYMOCYTES_UP		130	0.427217	1.5562	0.00297177	0.0930811	1	1721	tags=27%, list=15%, signal=31%
GOBP_ENDOTHELIAL_CELL_DEVELOPMENT	GOBP_ENDOTHELIAL_CELL_DEVELOPMENT		52	0.48847	1.55609	0.0203443	0.0930946	1	2406	tags=44%, list=20%, signal=55%
HP_MUSCLE_FIBER_ATROPHY	HP_MUSCLE_FIBER_ATROPHY		40	0.515211	1.55601	0.0282132	0.0930865	1	1253	tags=25%, list=11%, signal=28%
GSE19941_UNSTIM_VS_LPS_AND_IL10_STIM_IL10_KO_MACROPHAGE_UP	GSE19941_UNSTIM_VS_LPS_AND_IL10_STIM_IL10_KO_MACROPHAGE_UP		143	0.420436	1.5559	0.00539084	0.093099	1	1843	tags=28%, list=16%, signal=33%
HP_STRIDOR	HP_STRIDOR		20	0.604554	1.55589	0.0389171	0.0930362	1	1956	tags=45%, list=17%, signal=54%
GOBP_ACYLGLYCEROL_HOMEOSTASIS	GOBP_ACYLGLYCEROL_HOMEOSTASIS		17	0.62264	1.55585	0.0326461	0.0929949	1	3	tags=6%, list=0%, signal=6%
GSE2706_R848_VS_LPS_2H_STIM_DC_DN	GSE2706_R848_VS_LPS_2H_STIM_DC_DN		106	0.435367	1.55562	0.00770416	0.0930865	1	1445	tags=23%, list=12%, signal=26%
HALLMARK_TGF_BETA_SIGNALING	HALLMARK_TGF_BETA_SIGNALING		46	0.508827	1.55554	0.0219966	0.0930713	1	2063	tags=37%, list=17%, signal=45%
GOBP_SYNAPSE_ORGANIZATION	GOBP_SYNAPSE_ORGANIZATION		261	0.394418	1.55533	0	0.0931706	1	1913	tags=31%, list=16%, signal=36%
HP_GINGIVAL_OVERGROWTH	HP_GINGIVAL_OVERGROWTH		79	0.453807	1.55505	0.0136571	0.0932864	1	2338	tags=34%, list=20%, signal=42%
GOBP_SYNAPTIC_TRANSMISSION_GABAERGIC	GOBP_SYNAPTIC_TRANSMISSION_GABAERGIC		15	0.634112	1.55497	0.0397112	0.0932609	1	1360	tags=40%, list=12%, signal=45%
GOBP_REGULATION_OF_SYNAPSE_STRUCTURE_OR_ACTIVITY	GOBP_REGULATION_OF_SYNAPSE_STRUCTURE_OR_ACTIVITY		138	0.425084	1.55478	0.0058651	0.0933134	1	1853	tags=31%, list=16%, signal=37%
GSE40274_CTRL_VS_FOXP3_AND_XBP1_TRANSDUCED_ACTIVATED_CD4_TCELL_DN	GSE40274_CTRL_VS_FOXP3_AND_XBP1_TRANSDUCED_ACTIVATED_CD4_TCELL_DN		123	0.43018	1.55474	0.0113798	0.093258	1	1894	tags=28%, list=16%, signal=33%
GSE360_T_GONDII_VS_B_MALAYI_HIGH_DOSE_MAC_UP	GSE360_T_GONDII_VS_B_MALAYI_HIGH_DOSE_MAC_UP		147	0.415348	1.55463	0.0027933	0.0932711	1	2521	tags=35%, list=21%, signal=44%
GSE9988_LPS_VS_VEHICLE_TREATED_MONOCYTE_UP	GSE9988_LPS_VS_VEHICLE_TREATED_MONOCYTE_UP		140	0.42492	1.55441	0.00730994	0.093373	1	968	tags=18%, list=8%, signal=19%
GSE41176_UNSTIM_VS_ANTI_IGM_STIM_BCELL_24H_UP	GSE41176_UNSTIM_VS_ANTI_IGM_STIM_BCELL_24H_UP		108	0.437652	1.55428	0.00592593	0.0934016	1	1583	tags=31%, list=13%, signal=36%
GSE30971_WBP7_HET_VS_KO_MACROPHAGE_4H_LPS_STIM_UP	GSE30971_WBP7_HET_VS_KO_MACROPHAGE_4H_LPS_STIM_UP		163	0.419377	1.55412	0.00406504	0.0934553	1	1623	tags=21%, list=14%, signal=24%
GSE18281_CORTICAL_VS_MEDULLARY_THYMOCYTE_UP	GSE18281_CORTICAL_VS_MEDULLARY_THYMOCYTE_UP		148	0.417063	1.55386	0.00278164	0.0936141	1	2410	tags=36%, list=20%, signal=44%
GOBP_POSITIVE_REGULATION_OF_ACTIVATED_T_CELL_PROLIFERATION	GOBP_POSITIVE_REGULATION_OF_ACTIVATED_T_CELL_PROLIFERATION		15	0.635256	1.55371	0.0456942	0.0936442	1	1271	tags=20%, list=11%, signal=22%
GOBP_NEGATIVE_REGULATION_OF_TRANSPORT	GOBP_NEGATIVE_REGULATION_OF_TRANSPORT		271	0.394735	1.5533	0.00127551	0.0938964	1	2011	tags=27%, list=17%, signal=31%
GSE14413_UNSTIM_VS_IFNB_STIM_RAW264_CELLS_DN	GSE14413_UNSTIM_VS_IFNB_STIM_RAW264_CELLS_DN		59	0.474353	1.55292	0.0188976	0.0941239	1	1811	tags=36%, list=15%, signal=42%
GOBP_POSITIVE_REGULATION_OF_FATTY_ACID_METABOLIC_PROCESS	GOBP_POSITIVE_REGULATION_OF_FATTY_ACID_METABOLIC_PROCESS		20	0.586906	1.55288	0.0378657	0.0940706	1	2809	tags=55%, list=24%, signal=72%
GOBP_RESPONSE_TO_ESTRADIOL	GOBP_RESPONSE_TO_ESTRADIOL		81	0.462826	1.55288	0.0165165	0.0939939	1	1933	tags=36%, list=16%, signal=43%
GOBP_COCHLEA_MORPHOGENESIS	GOBP_COCHLEA_MORPHOGENESIS		15	0.628556	1.55284	0.03663	0.0939493	1	954	tags=47%, list=8%, signal=51%
GOBP_GLIOGENESIS	GOBP_GLIOGENESIS		197	0.401082	1.5527	0.00560224	0.0939812	1	1615	tags=27%, list=14%, signal=31%
GOBP_CARDIAC_VENTRICLE_DEVELOPMENT	GOBP_CARDIAC_VENTRICLE_DEVELOPMENT		80	0.453078	1.5524	0.015625	0.0941384	1	1393	tags=31%, list=12%, signal=35%
GOBP_REGULATION_OF_PHOSPHOLIPASE_C_ACTIVITY	GOBP_REGULATION_OF_PHOSPHOLIPASE_C_ACTIVITY		32	0.541212	1.55239	0.0293638	0.0940704	1	2527	tags=47%, list=21%, signal=59%
HP_EMG_ABNORMALITY	HP_EMG_ABNORMALITY		176	0.412828	1.55225	0.00281294	0.0940896	1	1301	tags=22%, list=11%, signal=25%
GOBP_ENDOCHONDRAL_BONE_MORPHOGENESIS	GOBP_ENDOCHONDRAL_BONE_MORPHOGENESIS		40	0.520164	1.55214	0.0114566	0.0940965	1	1327	tags=30%, list=11%, signal=34%
GOBP_NEGATIVE_REGULATION_OF_ATP_METABOLIC_PROCESS	GOBP_NEGATIVE_REGULATION_OF_ATP_METABOLIC_PROCESS		20	0.58931	1.55213	0.0330435	0.0940318	1	2809	tags=50%, list=24%, signal=65%
HP_ABNORMAL_RIB_CAGE_MORPHOLOGY	HP_ABNORMAL_RIB_CAGE_MORPHOLOGY		256	0.393062	1.55213	0	0.0939564	1	1775	tags=26%, list=15%, signal=30%
GSE32034_UNTREATED_VS_ROSIGLIZATONE_TREATED_LY6C_HIGH_MONOCYTE_UP	GSE32034_UNTREATED_VS_ROSIGLIZATONE_TREATED_LY6C_HIGH_MONOCYTE_UP		152	0.418784	1.55182	0.00276243	0.0941259	1	2444	tags=33%, list=21%, signal=41%
HALLMARK_APICAL_JUNCTION	HALLMARK_APICAL_JUNCTION		146	0.415862	1.55178	0.00722543	0.0940753	1	2425	tags=39%, list=21%, signal=49%
GSE20715_0H_VS_48H_OZONE_TLR4_KO_LUNG_UP	GSE20715_0H_VS_48H_OZONE_TLR4_KO_LUNG_UP		151	0.418046	1.55174	0.00436681	0.0940225	1	1556	tags=23%, list=13%, signal=26%
GOBP_REGULATION_OF_PLATELET_DERIVED_GROWTH_FACTOR_RECEPTOR_SIGNALING_PATHWAY	GOBP_REGULATION_OF_PLATELET_DERIVED_GROWTH_FACTOR_RECEPTOR_SIGNALING_PATHWAY		18	0.60835	1.55168	0.0420315	0.0940046	1	700	tags=28%, list=6%, signal=29%
GOBP_POSITIVE_REGULATION_OF_MACROPHAGE_MIGRATION	GOBP_POSITIVE_REGULATION_OF_MACROPHAGE_MIGRATION		19	0.613363	1.55089	0.0215054	0.0946054	1	2234	tags=53%, list=19%, signal=65%
GSE23502_BM_VS_COLON_TUMOR_HDC_KO_MYELOID_DERIVED_SUPPRESSOR_CELL_UP	GSE23502_BM_VS_COLON_TUMOR_HDC_KO_MYELOID_DERIVED_SUPPRESSOR_CELL_UP		80	0.456626	1.55086	0.0165663	0.0945593	1	1432	tags=26%, list=12%, signal=30%
GOBP_REGULATION_OF_CELL_MORPHOGENESIS_INVOLVED_IN_DIFFERENTIATION	GOBP_REGULATION_OF_CELL_MORPHOGENESIS_INVOLVED_IN_DIFFERENTIATION		75	0.460227	1.5508	0.0111643	0.0945471	1	1893	tags=28%, list=16%, signal=33%
GOBP_PLASMA_MEMBRANE_ORGANIZATION	GOBP_PLASMA_MEMBRANE_ORGANIZATION		79	0.455896	1.55063	0.0146199	0.0945874	1	2468	tags=35%, list=21%, signal=45%
GOCC_BASOLATERAL_PLASMA_MEMBRANE	GOCC_BASOLATERAL_PLASMA_MEMBRANE		133	0.430233	1.55032	0.00144092	0.0947493	1	2071	tags=33%, list=18%, signal=40%
GSE1566_WT_VS_EZH2_KO_LN_TCELL_UP	GSE1566_WT_VS_EZH2_KO_LN_TCELL_UP		126	0.423156	1.55009	0	0.0948423	1	2271	tags=32%, list=19%, signal=39%
GSE360_LOW_DOSE_B_MALAYI_VS_M_TUBERCULOSIS_DC_DN	GSE360_LOW_DOSE_B_MALAYI_VS_M_TUBERCULOSIS_DC_DN		154	0.414143	1.54967	0.00843882	0.0951045	1	1407	tags=21%, list=12%, signal=24%
GSE25085_FETAL_LIVER_VS_FETAL_BM_SP4_THYMIC_IMPLANT_DN	GSE25085_FETAL_LIVER_VS_FETAL_BM_SP4_THYMIC_IMPLANT_DN		162	0.409866	1.54948	0.00568182	0.0951871	1	2105	tags=28%, list=18%, signal=34%
GSE40068_CXCR5NEG_BCL6NEG_CD4_TCELL_VS_CXCR5POS_BCL6NEG_TFH_DN	GSE40068_CXCR5NEG_BCL6NEG_CD4_TCELL_VS_CXCR5POS_BCL6NEG_TFH_DN		167	0.406236	1.54936	0.00274725	0.0952114	1	2206	tags=35%, list=19%, signal=42%
VEGF_A_UP.V1_UP	VEGF_A_UP.V1_UP		128	0.425253	1.54927	0.00858369	0.0952173	1	1965	tags=34%, list=17%, signal=40%
GSE4748_LPS_VS_LPS_AND_CYANOBACTERIUM_LPSLIKE_STIM_DC_3H_DN	GSE4748_LPS_VS_LPS_AND_CYANOBACTERIUM_LPSLIKE_STIM_DC_3H_DN		93	0.441645	1.54917	0.0179372	0.0952291	1	1719	tags=26%, list=15%, signal=30%
GSE15733_BM_VS_SPLEEN_MEMORY_CD4_TCELL_UP	GSE15733_BM_VS_SPLEEN_MEMORY_CD4_TCELL_UP		135	0.417856	1.54878	0	0.0954616	1	1616	tags=29%, list=14%, signal=33%
GOBP_NEGATIVE_REGULATION_OF_ERBB_SIGNALING_PATHWAY	GOBP_NEGATIVE_REGULATION_OF_ERBB_SIGNALING_PATHWAY		40	0.512754	1.54868	0.0287081	0.0954757	1	542	tags=18%, list=5%, signal=18%
HP_SPINAL_CORD_LESION	HP_SPINAL_CORD_LESION		24	0.563173	1.54864	0.0307692	0.0954278	1	1941	tags=29%, list=16%, signal=35%
HP_HYPOPLASTIC_FINGERNAIL	HP_HYPOPLASTIC_FINGERNAIL		34	0.527297	1.54847	0.036566	0.09547	1	1410	tags=32%, list=12%, signal=37%
GOBP_RESPONSE_TO_MOLECULE_OF_BACTERIAL_ORIGIN	GOBP_RESPONSE_TO_MOLECULE_OF_BACTERIAL_ORIGIN		238	0.399351	1.54841	0.00393185	0.0954389	1	1977	tags=31%, list=17%, signal=36%
GOBP_RESPONSE_TO_CADMIUM_ION	GOBP_RESPONSE_TO_CADMIUM_ION		40	0.519043	1.54823	0.0390492	0.095526	1	335	tags=15%, list=3%, signal=15%
GOBP_PROSTANOID_BIOSYNTHETIC_PROCESS	GOBP_PROSTANOID_BIOSYNTHETIC_PROCESS		17	0.608764	1.54808	0.0419708	0.0955781	1	1209	tags=35%, list=10%, signal=39%
GOBP_STEM_CELL_PROLIFERATION	GOBP_STEM_CELL_PROLIFERATION		45	0.495446	1.54754	0.0243506	0.0959612	1	1816	tags=31%, list=15%, signal=37%
GSE32034_LY6C_HIGH_VS_LOW_ROSIGLIZATONE_TREATED_MONOCYTE_DN	GSE32034_LY6C_HIGH_VS_LOW_ROSIGLIZATONE_TREATED_MONOCYTE_DN		158	0.409221	1.54747	0.00698324	0.0959382	1	1993	tags=25%, list=17%, signal=30%
GSE3982_DC_VS_CENT_MEMORY_CD4_TCELL_UP	GSE3982_DC_VS_CENT_MEMORY_CD4_TCELL_UP		169	0.411067	1.54739	0.00416667	0.0959244	1	1978	tags=28%, list=17%, signal=34%
GARCIA_PINERES_PBMC_HPV_16_L1_VLP_AGE_18_25YO_2MO_DN	GARCIA_PINERES_PBMC_HPV_16_L1_VLP_AGE_18_25YO_2MO_DN		205	0.399489	1.54735	0.00547945	0.0958756	1	2990	tags=42%, list=25%, signal=56%
GSE2706_2H_VS_8H_R848_STIM_DC_UP	GSE2706_2H_VS_8H_R848_STIM_DC_UP		151	0.420198	1.54719	0.00141044	0.0959257	1	1577	tags=25%, list=13%, signal=28%
GSE29618_BCELL_VS_PDC_DAY7_FLU_VACCINE_DN	GSE29618_BCELL_VS_PDC_DAY7_FLU_VACCINE_DN		163	0.409876	1.54713	0	0.095896	1	2490	tags=34%, list=21%, signal=43%
GOBP_CIRCULATORY_SYSTEM_PROCESS	GOBP_CIRCULATORY_SYSTEM_PROCESS		365	0.381566	1.54698	0	0.0959466	1	1974	tags=32%, list=17%, signal=37%
HP_ADDUCTED_THUMB	HP_ADDUCTED_THUMB		64	0.457095	1.54689	0.0260337	0.0959336	1	1394	tags=17%, list=12%, signal=19%
GOBP_RESPONSE_TO_PLATELET_DERIVED_GROWTH_FACTOR	GOBP_RESPONSE_TO_PLATELET_DERIVED_GROWTH_FACTOR		18	0.610773	1.54675	0.0413669	0.0959698	1	1819	tags=44%, list=15%, signal=52%
GOBP_FIBROBLAST_MIGRATION	GOBP_FIBROBLAST_MIGRATION		38	0.513114	1.54666	0.0383333	0.0959741	1	1480	tags=24%, list=13%, signal=27%
GSE17974_IL4_AND_ANTI_IL12_VS_UNTREATED_1H_ACT_CD4_TCELL_UP	GSE17974_IL4_AND_ANTI_IL12_VS_UNTREATED_1H_ACT_CD4_TCELL_UP		96	0.445407	1.54642	0.0208024	0.0960828	1	1594	tags=29%, list=13%, signal=33%
GOBP_CELL_GROWTH	GOBP_CELL_GROWTH		354	0.383408	1.54631	0.00127551	0.0960901	1	2002	tags=28%, list=17%, signal=32%
GSE27786_BCELL_VS_ERYTHROBLAST_DN	GSE27786_BCELL_VS_ERYTHROBLAST_DN		114	0.432392	1.5462	0.00708215	0.0961018	1	2580	tags=38%, list=22%, signal=48%
GSE10463_CD40L_AND_VA347_VS_CD40L_IN_DC_DN	GSE10463_CD40L_AND_VA347_VS_CD40L_IN_DC_DN		90	0.445143	1.54612	0.012012	0.0960856	1	1957	tags=36%, list=17%, signal=42%
HP_ABNORMAL_CORONARY_ARTERY_MORPHOLOGY	HP_ABNORMAL_CORONARY_ARTERY_MORPHOLOGY		45	0.498644	1.54606	0.0209003	0.096053	1	2805	tags=44%, list=24%, signal=58%
GOBP_REGULATION_OF_NERVOUS_SYSTEM_DEVELOPMENT	GOBP_REGULATION_OF_NERVOUS_SYSTEM_DEVELOPMENT		290	0.382297	1.54592	0	0.0960722	1	1828	tags=27%, list=15%, signal=31%
GOBP_POSITIVE_REGULATION_OF_ANION_TRANSMEMBRANE_TRANSPORT	GOBP_POSITIVE_REGULATION_OF_ANION_TRANSMEMBRANE_TRANSPORT		42	0.500953	1.54571	0.0255537	0.0961778	1	1603	tags=29%, list=14%, signal=33%
GSE22886_NEUTROPHIL_VS_DC_UP	GSE22886_NEUTROPHIL_VS_DC_UP		114	0.432029	1.54567	0.00739645	0.0961317	1	1046	tags=29%, list=9%, signal=31%
GSE24142_DN2_VS_DN3_THYMOCYTE_UP	GSE24142_DN2_VS_DN3_THYMOCYTE_UP		158	0.412622	1.54514	0.0056101	0.0964794	1	1788	tags=26%, list=15%, signal=30%
GOBP_VASOCONSTRICTION	GOBP_VASOCONSTRICTION		49	0.484422	1.54471	0.0178571	0.0967307	1	1695	tags=37%, list=14%, signal=43%
GOBP_INTERLEUKIN_8_PRODUCTION	GOBP_INTERLEUKIN_8_PRODUCTION		64	0.478602	1.54447	0.0123648	0.0968354	1	1719	tags=28%, list=15%, signal=33%
GOBP_STRIATED_MUSCLE_ADAPTATION	GOBP_STRIATED_MUSCLE_ADAPTATION		26	0.551636	1.54435	0.0567986	0.0968487	1	2304	tags=38%, list=20%, signal=48%
GOBP_POSITIVE_REGULATION_OF_SMOOTH_MUSCLE_CELL_MIGRATION	GOBP_POSITIVE_REGULATION_OF_SMOOTH_MUSCLE_CELL_MIGRATION		34	0.526125	1.54408	0.0298013	0.0970184	1	2155	tags=50%, list=18%, signal=61%
GOBP_CELLULAR_HORMONE_METABOLIC_PROCESS	GOBP_CELLULAR_HORMONE_METABOLIC_PROCESS		70	0.459006	1.54341	0.0168971	0.0975018	1	1188	tags=27%, list=10%, signal=30%
GOBP_NEGATIVE_REGULATION_OF_ERK1_AND_ERK2_CASCADE	GOBP_NEGATIVE_REGULATION_OF_ERK1_AND_ERK2_CASCADE		52	0.484843	1.5434	0.028754	0.0974302	1	1249	tags=23%, list=11%, signal=26%
HP_LARYNGOMALACIA	HP_LARYNGOMALACIA		51	0.492471	1.54321	0.0282132	0.0974938	1	1837	tags=31%, list=16%, signal=37%
GOMF_GROWTH_FACTOR_RECEPTOR_BINDING	GOMF_GROWTH_FACTOR_RECEPTOR_BINDING		101	0.433277	1.5432	0.0207715	0.0974275	1	1853	tags=29%, list=16%, signal=34%
GOBP_ICOSANOID_TRANSPORT	GOBP_ICOSANOID_TRANSPORT		26	0.556787	1.54308	0.0399334	0.0974425	1	1689	tags=38%, list=14%, signal=45%
GSE21546_WT_VS_ELK1_KO_DP_THYMOCYTES_UP	GSE21546_WT_VS_ELK1_KO_DP_THYMOCYTES_UP		148	0.413692	1.5424	0.00143678	0.0979153	1	1785	tags=25%, list=15%, signal=29%
GOBP_EPITHELIAL_CELL_DIFFERENTIATION	GOBP_EPITHELIAL_CELL_DIFFERENTIATION		389	0.372521	1.54222	0	0.097991	1	1819	tags=31%, list=15%, signal=36%
HP_MACULAR_PURPURA	HP_MACULAR_PURPURA		47	0.498462	1.54206	0.0255183	0.0980687	1	793	tags=19%, list=7%, signal=20%
GSE22501_PERIPHERAL_BLOOD_VS_CORD_BLOOD_TREG_UP	GSE22501_PERIPHERAL_BLOOD_VS_CORD_BLOOD_TREG_UP		125	0.427283	1.54155	0.00977654	0.0983892	1	1129	tags=23%, list=10%, signal=25%
GOBP_REGULATION_OF_EXTRINSIC_APOPTOTIC_SIGNALING_PATHWAY	GOBP_REGULATION_OF_EXTRINSIC_APOPTOTIC_SIGNALING_PATHWAY		112	0.434703	1.54115	0.00582242	0.0986291	1	2622	tags=40%, list=22%, signal=51%
HP_ABNORMAL_SPINAL_MENINGEAL_MORPHOLOGY	HP_ABNORMAL_SPINAL_MENINGEAL_MORPHOLOGY		20	0.593545	1.54112	0.0420875	0.0985735	1	1568	tags=35%, list=13%, signal=40%
GOBP_CARDIAC_MUSCLE_TISSUE_DEVELOPMENT	GOBP_CARDIAC_MUSCLE_TISSUE_DEVELOPMENT		129	0.421804	1.54095	0.00564175	0.0986275	1	1452	tags=28%, list=12%, signal=31%
GSE13547_WT_VS_ZFX_KO_BCELL_ANTI_IGM_STIM_12H_UP	GSE13547_WT_VS_ZFX_KO_BCELL_ANTI_IGM_STIM_12H_UP		65	0.461239	1.54036	0.0205696	0.0990341	1	1939	tags=40%, list=16%, signal=48%
GOBP_CELLULAR_RESPONSE_TO_NUTRIENT	GOBP_CELLULAR_RESPONSE_TO_NUTRIENT		32	0.537309	1.54025	0.0324675	0.0990286	1	1584	tags=34%, list=13%, signal=40%
GOMF_BETA_CATENIN_BINDING	GOMF_BETA_CATENIN_BINDING		69	0.461605	1.54025	0.0223214	0.0989514	1	1554	tags=30%, list=13%, signal=35%
GOBP_MYELOID_LEUKOCYTE_DIFFERENTIATION	GOBP_MYELOID_LEUKOCYTE_DIFFERENTIATION		150	0.418939	1.54007	0.00429185	0.0990131	1	2271	tags=31%, list=19%, signal=37%
GSE10422_WT_VS_BAFF_TRANSGENIC_LN_BCELL_DN	GSE10422_WT_VS_BAFF_TRANSGENIC_LN_BCELL_DN		86	0.442893	1.54007	0.0149477	0.098939	1	1495	tags=30%, list=13%, signal=34%
HP_MULTIPLE_RENAL_CYSTS	HP_MULTIPLE_RENAL_CYSTS		29	0.543571	1.53959	0.030303	0.0992698	1	1519	tags=28%, list=13%, signal=32%
GOBP_REGULATION_OF_MUSCLE_ADAPTATION	GOBP_REGULATION_OF_MUSCLE_ADAPTATION		59	0.478512	1.53937	0.0125984	0.099379	1	1375	tags=25%, list=12%, signal=29%
GOBP_POSITIVE_REGULATION_OF_CELL_DEATH	GOBP_POSITIVE_REGULATION_OF_CELL_DEATH		466	0.369717	1.5393	0	0.0993534	1	1723	tags=21%, list=15%, signal=24%
GARCIA_PINERES_PBMC_HPV_16_L1_VLP_AGE_18_25YO_7MO_CORRELATED_WITH_ANTIBODY_RESPONSE_POSITIVE	GARCIA_PINERES_PBMC_HPV_16_L1_VLP_AGE_18_25YO_7MO_CORRELATED_WITH_ANTIBODY_RESPONSE_POSITIVE		16	0.61139	1.53916	0.0390764	0.0993837	1	74	tags=13%, list=1%, signal=13%
GSE8921_UNSTIM_0H_VS_TLR1_2_STIM_MONOCYTE_3H_DN	GSE8921_UNSTIM_0H_VS_TLR1_2_STIM_MONOCYTE_3H_DN		98	0.433654	1.53896	0.0104012	0.0994875	1	1373	tags=27%, list=12%, signal=30%
GOMF_PEPTIDASE_ACTIVATOR_ACTIVITY	GOMF_PEPTIDASE_ACTIVATOR_ACTIVITY		33	0.530756	1.53858	0.0316667	0.0997452	1	928	tags=18%, list=8%, signal=20%
GOBP_REGULATION_OF_NEURON_PROJECTION_REGENERATION	GOBP_REGULATION_OF_NEURON_PROJECTION_REGENERATION		23	0.56849	1.53849	0.0418848	0.0997406	1	2534	tags=52%, list=21%, signal=66%
GSE17974_IL4_AND_ANTI_IL12_VS_UNTREATED_2H_ACT_CD4_TCELL_DN	GSE17974_IL4_AND_ANTI_IL12_VS_UNTREATED_2H_ACT_CD4_TCELL_DN		116	0.424521	1.53843	0.00722543	0.0997008	1	2181	tags=35%, list=18%, signal=43%
GSE12845_IGD_POS_BLOOD_VS_DARKZONE_GC_TONSIL_BCELL_UP	GSE12845_IGD_POS_BLOOD_VS_DARKZONE_GC_TONSIL_BCELL_UP		123	0.428588	1.53817	0.00979021	0.0998143	1	2193	tags=27%, list=19%, signal=33%
GOCC_APICAL_PART_OF_CELL	GOCC_APICAL_PART_OF_CELL		245	0.391495	1.53816	0.00261438	0.0997423	1	2063	tags=29%, list=17%, signal=35%
P53_DN.V2_UP	P53_DN.V2_UP		67	0.464982	1.53766	0.00628931	0.10009	1	1032	tags=22%, list=9%, signal=24%
GOBP_FOCAL_ADHESION_ASSEMBLY	GOBP_FOCAL_ADHESION_ASSEMBLY		78	0.449247	1.53748	0.0182094	0.100156	1	2231	tags=36%, list=19%, signal=44%
HP_SYSTEMIC_LUPUS_ERYTHEMATOSUS	HP_SYSTEMIC_LUPUS_ERYTHEMATOSUS		26	0.554591	1.53734	0.0364842	0.100197	1	1096	tags=27%, list=9%, signal=30%
HP_ABNORMAL_5TH_FINGER_PHALANX_MORPHOLOGY	HP_ABNORMAL_5TH_FINGER_PHALANX_MORPHOLOGY		22	0.571437	1.53679	0.048414	0.100597	1	1043	tags=27%, list=9%, signal=30%
HP_CHORIORETINAL_DEGENERATION	HP_CHORIORETINAL_DEGENERATION		15	0.623015	1.53646	0.0433213	0.100785	1	1393	tags=33%, list=12%, signal=38%
GSE45365_CTRL_VS_MCMV_INFECTION_NK_CELL_UP	GSE45365_CTRL_VS_MCMV_INFECTION_NK_CELL_UP		158	0.41006	1.53637	0.00576369	0.100774	1	2125	tags=32%, list=18%, signal=38%
HP_HYPOPLASIA_OF_THE_PONS	HP_HYPOPLASIA_OF_THE_PONS		43	0.500835	1.53621	0.0234742	0.100831	1	1248	tags=26%, list=11%, signal=28%
HP_ABNORMALITY_OF_SKULL_OSSIFICATION	HP_ABNORMALITY_OF_SKULL_OSSIFICATION		30	0.53767	1.53588	0.0359477	0.101054	1	1097	tags=27%, list=9%, signal=29%
GSE9509_10MIN_VS_30MIN_LPS_AND_IL10_STIM_IL10_KO_MACROPHAGE_DN	GSE9509_10MIN_VS_30MIN_LPS_AND_IL10_STIM_IL10_KO_MACROPHAGE_DN		121	0.422073	1.53585	0.00431035	0.101008	1	1958	tags=24%, list=17%, signal=28%
GOBP_CARDIAC_MUSCLE_TISSUE_MORPHOGENESIS	GOBP_CARDIAC_MUSCLE_TISSUE_MORPHOGENESIS		35	0.523527	1.53577	0.0428336	0.100986	1	1778	tags=46%, list=15%, signal=54%
GSE23321_CD8_STEM_CELL_MEMORY_VS_CENTRAL_MEMORY_CD8_TCELL_UP	GSE23321_CD8_STEM_CELL_MEMORY_VS_CENTRAL_MEMORY_CD8_TCELL_UP		120	0.41702	1.53571	0.00720461	0.100955	1	1353	tags=25%, list=11%, signal=28%
GOBP_REGULATION_OF_SIGNALING_RECEPTOR_ACTIVITY	GOBP_REGULATION_OF_SIGNALING_RECEPTOR_ACTIVITY		97	0.433074	1.53553	0.0100575	0.101022	1	662	tags=21%, list=6%, signal=22%
HP_DEPRESSED_NASAL_RIDGE	HP_DEPRESSED_NASAL_RIDGE		83	0.442739	1.53551	0.0149031	0.100963	1	1623	tags=25%, list=14%, signal=29%
GOMF_CYTOKINE_RECEPTOR_BINDING	GOMF_CYTOKINE_RECEPTOR_BINDING		160	0.409407	1.53549	0.0013624	0.100905	1	1985	tags=30%, list=17%, signal=36%
GSE2405_0H_VS_6H_A_PHAGOCYTOPHILUM_STIM_NEUTROPHIL_DN	GSE2405_0H_VS_6H_A_PHAGOCYTOPHILUM_STIM_NEUTROPHIL_DN		123	0.418209	1.5353	0.0178082	0.101002	1	1659	tags=24%, list=14%, signal=27%
GOBP_PLATELET_AGGREGATION	GOBP_PLATELET_AGGREGATION		47	0.501889	1.53463	0.0367412	0.101453	1	1320	tags=26%, list=11%, signal=29%
GOBP_PROTEOGLYCAN_METABOLIC_PROCESS	GOBP_PROTEOGLYCAN_METABOLIC_PROCESS		61	0.474502	1.53435	0.0203762	0.101619	1	2249	tags=36%, list=19%, signal=44%
HP_ABNORMAL_SCAPULA_MORPHOLOGY	HP_ABNORMAL_SCAPULA_MORPHOLOGY		102	0.432599	1.53413	0.0102339	0.101737	1	1549	tags=25%, list=13%, signal=29%
GOBP_NEURAL_CREST_CELL_DIFFERENTIATION	GOBP_NEURAL_CREST_CELL_DIFFERENTIATION		63	0.473616	1.53398	0.0139104	0.101782	1	1814	tags=41%, list=15%, signal=48%
HP_WEAK_CRY	HP_WEAK_CRY		27	0.54566	1.53368	0.0302067	0.101939	1	1253	tags=30%, list=11%, signal=33%
GOBP_REGULATION_OF_EXTRINSIC_APOPTOTIC_SIGNALING_PATHWAY_VIA_DEATH_DOMAIN_RECEPTORS	GOBP_REGULATION_OF_EXTRINSIC_APOPTOTIC_SIGNALING_PATHWAY_VIA_DEATH_DOMAIN_RECEPTORS		44	0.502945	1.53327	0.0419355	0.102206	1	2017	tags=32%, list=17%, signal=38%
HP_APLASIA_HYPOPLASIA_OF_TOE	HP_APLASIA_HYPOPLASIA_OF_TOE		109	0.432026	1.53325	0.0132743	0.102145	1	1410	tags=22%, list=12%, signal=25%
HP_SPINA_BIFIDA_OCCULTA	HP_SPINA_BIFIDA_OCCULTA		47	0.493998	1.53315	0.029316	0.10215	1	1320	tags=19%, list=11%, signal=21%
GOBP_REGULATION_OF_MACROPHAGE_DIFFERENTIATION	GOBP_REGULATION_OF_MACROPHAGE_DIFFERENTIATION		16	0.616046	1.53265	0.0437158	0.102505	1	774	tags=31%, list=7%, signal=33%
GOBP_REGULATION_OF_PROTEIN_TYROSINE_KINASE_ACTIVITY	GOBP_REGULATION_OF_PROTEIN_TYROSINE_KINASE_ACTIVITY		68	0.46695	1.53245	0.0159236	0.102595	1	1985	tags=35%, list=17%, signal=42%
GOBP_POSITIVE_REGULATION_OF_ENDOCYTOSIS	GOBP_POSITIVE_REGULATION_OF_ENDOCYTOSIS		75	0.452489	1.5324	0.0195489	0.102557	1	1299	tags=24%, list=11%, signal=27%
GSE4748_CTRL_VS_LPS_STIM_DC_3H_DN	GSE4748_CTRL_VS_LPS_STIM_DC_3H_DN		152	0.411842	1.53229	0.00846262	0.102575	1	1391	tags=20%, list=12%, signal=22%
GOBP_ENDOCRINE_SYSTEM_DEVELOPMENT	GOBP_ENDOCRINE_SYSTEM_DEVELOPMENT		68	0.470715	1.53216	0.020155	0.102591	1	1804	tags=34%, list=15%, signal=40%
GOBP_NEGATIVE_REGULATION_OF_MYELOID_LEUKOCYTE_DIFFERENTIATION	GOBP_NEGATIVE_REGULATION_OF_MYELOID_LEUKOCYTE_DIFFERENTIATION		32	0.526601	1.53186	0.040747	0.102758	1	857	tags=22%, list=7%, signal=24%
GOCC_IMMUNOGLOBULIN_COMPLEX	GOCC_IMMUNOGLOBULIN_COMPLEX		19	0.576292	1.53147	0.054386	0.102999	1	75	tags=21%, list=1%, signal=21%
GSE24142_ADULT_VS_FETAL_DN2_THYMOCYTE_DN	GSE24142_ADULT_VS_FETAL_DN2_THYMOCYTE_DN		145	0.410739	1.53105	0.00985915	0.103253	1	1750	tags=26%, list=15%, signal=30%
GOBP_REGULATION_OF_PROTEIN_POLYUBIQUITINATION	GOBP_REGULATION_OF_PROTEIN_POLYUBIQUITINATION		20	0.591018	1.53085	0.0472175	0.103352	1	1421	tags=15%, list=12%, signal=17%
GSE2770_IL12_ACT_VS_ACT_CD4_TCELL_48H_UP	GSE2770_IL12_ACT_VS_ACT_CD4_TCELL_48H_UP		172	0.40092	1.53083	0.00137363	0.103293	1	2461	tags=27%, list=21%, signal=34%
GOBP_POSITIVE_REGULATION_OF_NEURON_PROJECTION_DEVELOPMENT	GOBP_POSITIVE_REGULATION_OF_NEURON_PROJECTION_DEVELOPMENT		115	0.425323	1.53064	0.00580551	0.103372	1	1483	tags=23%, list=13%, signal=27%
GSE9509_LPS_VS_LPS_AND_IL10_STIM_IL10_KO_MACROPHAGE_30MIN_UP	GSE9509_LPS_VS_LPS_AND_IL10_STIM_IL10_KO_MACROPHAGE_30MIN_UP		148	0.412904	1.53055	0.00956284	0.103371	1	2527	tags=40%, list=21%, signal=50%
GSE3982_DC_VS_BCELL_UP	GSE3982_DC_VS_BCELL_UP		160	0.408107	1.5305	0.0097493	0.103323	1	1754	tags=26%, list=15%, signal=30%
GOBP_AGING	GOBP_AGING		212	0.395908	1.53048	0.00269542	0.103262	1	1626	tags=21%, list=14%, signal=24%
GOBP_C21_STEROID_HORMONE_METABOLIC_PROCESS	GOBP_C21_STEROID_HORMONE_METABOLIC_PROCESS		23	0.567846	1.53041	0.0431779	0.103235	1	992	tags=35%, list=8%, signal=38%
GOBP_SEMAPHORIN_PLEXIN_SIGNALING_PATHWAY	GOBP_SEMAPHORIN_PLEXIN_SIGNALING_PATHWAY		37	0.519321	1.53019	0.0372771	0.103351	1	2540	tags=54%, list=22%, signal=69%
HP_ABNORMALITY_OF_LOWER_LIMB_EPIPHYSIS_MORPHOLOGY	HP_ABNORMALITY_OF_LOWER_LIMB_EPIPHYSIS_MORPHOLOGY		50	0.484481	1.53006	0.025	0.103383	1	1005	tags=20%, list=9%, signal=22%
GSE25502_WT_VS_KLF13_KO_THYMIC_MEMORY_LIKE_CD8_TCELL_DN	GSE25502_WT_VS_KLF13_KO_THYMIC_MEMORY_LIKE_CD8_TCELL_DN		76	0.44453	1.52989	0.0212443	0.103453	1	1279	tags=25%, list=11%, signal=28%
GOBP_MULTICELLULAR_ORGANISMAL_HOMEOSTASIS	GOBP_MULTICELLULAR_ORGANISMAL_HOMEOSTASIS		356	0.374568	1.52986	0.00123916	0.1034	1	2208	tags=30%, list=19%, signal=36%
GSE43955_1H_VS_10H_ACT_CD4_TCELL_DN	GSE43955_1H_VS_10H_ACT_CD4_TCELL_DN		138	0.417149	1.52919	0.00703235	0.10389	1	2643	tags=38%, list=22%, signal=48%
GOCC_CLATHRIN_COATED_ENDOCYTIC_VESICLE	GOCC_CLATHRIN_COATED_ENDOCYTIC_VESICLE		37	0.508299	1.5288	0.04	0.104121	1	1110	tags=24%, list=9%, signal=27%
GSE7596_AKT_TRANSD_VS_CTRL_CD4_TCONV_WITH_TGFB_DN	GSE7596_AKT_TRANSD_VS_CTRL_CD4_TCONV_WITH_TGFB_DN		68	0.459118	1.52845	0.0327103	0.104337	1	1379	tags=34%, list=12%, signal=38%
GOBP_REGULATION_OF_ANION_TRANSMEMBRANE_TRANSPORT	GOBP_REGULATION_OF_ANION_TRANSMEMBRANE_TRANSPORT		83	0.447592	1.52835	0.015083	0.10433	1	1603	tags=24%, list=14%, signal=28%
GOCC_TERTIARY_GRANULE_LUMEN	GOCC_TERTIARY_GRANULE_LUMEN		40	0.498786	1.52825	0.0283465	0.104346	1	913	tags=20%, list=8%, signal=22%
RAF_UP.V1_DN	RAF_UP.V1_DN		150	0.405222	1.52783	0.00275482	0.10463	1	1886	tags=31%, list=16%, signal=36%
GSE4142_GC_BCELL_VS_MEMORY_BCELL_UP	GSE4142_GC_BCELL_VS_MEMORY_BCELL_UP		149	0.403745	1.52781	0.00727802	0.104571	1	878	tags=10%, list=7%, signal=11%
GSE23114_PERITONEAL_CAVITY_B1A_BCELL_VS_SPLEEN_BCELL_UP	GSE23114_PERITONEAL_CAVITY_B1A_BCELL_VS_SPLEEN_BCELL_UP		92	0.441526	1.52732	0.0121766	0.104895	1	1704	tags=23%, list=14%, signal=26%
HP_INCREASED_CONNECTIVE_TISSUE	HP_INCREASED_CONNECTIVE_TISSUE		19	0.595911	1.52692	0.0469012	0.10517	1	488	tags=26%, list=4%, signal=27%
GOBP_P38MAPK_CASCADE	GOBP_P38MAPK_CASCADE		39	0.508819	1.5262	0.0228758	0.105712	1	2017	tags=38%, list=17%, signal=46%
GSE8515_CTRL_VS_IL1_4H_STIM_MAC_DN	GSE8515_CTRL_VS_IL1_4H_STIM_MAC_DN		147	0.417632	1.52592	0.00426136	0.105864	1	1499	tags=19%, list=13%, signal=22%
GSE18791_UNSTIM_VS_NEWCATSLE_VIRUS_DC_2H_UP	GSE18791_UNSTIM_VS_NEWCATSLE_VIRUS_DC_2H_UP		68	0.460311	1.52569	0.0240601	0.106003	1	1573	tags=31%, list=13%, signal=35%
GOBP_REGULATION_OF_MUSCLE_HYPERTROPHY	GOBP_REGULATION_OF_MUSCLE_HYPERTROPHY		45	0.49463	1.52564	0.0368	0.105963	1	1375	tags=29%, list=12%, signal=33%
GOBP_MONOCYTE_CHEMOTAXIS	GOBP_MONOCYTE_CHEMOTAXIS		42	0.490933	1.52538	0.0321489	0.106131	1	1046	tags=33%, list=9%, signal=36%
HP_NECK_FLEXOR_WEAKNESS	HP_NECK_FLEXOR_WEAKNESS		24	0.568967	1.52529	0.0375427	0.106126	1	958	tags=25%, list=8%, signal=27%
GOBP_RESPONSE_TO_STEROID_HORMONE	GOBP_RESPONSE_TO_STEROID_HORMONE		236	0.38595	1.52509	0.00127714	0.106231	1	1107	tags=17%, list=9%, signal=18%
GSE43955_10H_VS_30H_ACT_CD4_TCELL_WITH_TGFB_IL6_DN	GSE43955_10H_VS_30H_ACT_CD4_TCELL_WITH_TGFB_IL6_DN		153	0.410436	1.52505	0.00278552	0.10619	1	1606	tags=21%, list=14%, signal=24%
GSE17721_POLYIC_VS_PAM3CSK4_2H_BMDC_DN	GSE17721_POLYIC_VS_PAM3CSK4_2H_BMDC_DN		131	0.415687	1.52496	0.0130624	0.106199	1	2510	tags=27%, list=21%, signal=35%
GOBP_REGULATION_OF_CELL_DEVELOPMENT	GOBP_REGULATION_OF_CELL_DEVELOPMENT		344	0.375929	1.52485	0	0.106199	1	1828	tags=27%, list=15%, signal=31%
GSE18893_TCONV_VS_TREG_24H_CULTURE_UP	GSE18893_TCONV_VS_TREG_24H_CULTURE_UP		162	0.405785	1.52482	0.0041841	0.10615	1	2205	tags=35%, list=19%, signal=43%
HP_TALIPES_EQUINOVARUS	HP_TALIPES_EQUINOVARUS		223	0.389745	1.52418	0.00531915	0.106643	1	1828	tags=25%, list=15%, signal=29%
HP_CHORIORETINAL_COLOBOMA	HP_CHORIORETINAL_COLOBOMA		30	0.524452	1.52338	0.0387205	0.107284	1	2523	tags=33%, list=21%, signal=42%
HP_ASPIRATION	HP_ASPIRATION		15	0.636441	1.52331	0.0551724	0.107275	1	1233	tags=27%, list=10%, signal=30%
HP_CONGENITAL_CONTRACTURE	HP_CONGENITAL_CONTRACTURE		104	0.428663	1.52301	0.0122137	0.107461	1	951	tags=18%, list=8%, signal=20%
HP_ESOPHAGEAL_NEOPLASM	HP_ESOPHAGEAL_NEOPLASM		19	0.581985	1.52288	0.0362694	0.107494	1	242	tags=16%, list=2%, signal=16%
GSE17721_CTRL_VS_LPS_4H_BMDC_DN	GSE17721_CTRL_VS_LPS_4H_BMDC_DN		141	0.41061	1.52287	0.00424328	0.107431	1	2049	tags=28%, list=17%, signal=34%
HP_ABNORMALITY_OF_THE_ZYGOMATIC_BONE	HP_ABNORMALITY_OF_THE_ZYGOMATIC_BONE		183	0.399441	1.52283	0.00275482	0.107385	1	1809	tags=27%, list=15%, signal=31%
GOMF_PHOSPHATIDYLSERINE_BINDING	GOMF_PHOSPHATIDYLSERINE_BINDING		35	0.519511	1.52273	0.0276873	0.107386	1	1947	tags=37%, list=16%, signal=44%
GSE2706_UNSTIM_VS_2H_LPS_AND_R848_DC_DN	GSE2706_UNSTIM_VS_2H_LPS_AND_R848_DC_DN		140	0.413619	1.52269	0.00289017	0.107343	1	2728	tags=37%, list=23%, signal=48%
HP_UPPER_LIMB_MUSCLE_WEAKNESS	HP_UPPER_LIMB_MUSCLE_WEAKNESS		53	0.477971	1.52261	0.0336538	0.107342	1	1696	tags=25%, list=14%, signal=29%
HP_WEAKNESS_OF_FACIAL_MUSCULATURE	HP_WEAKNESS_OF_FACIAL_MUSCULATURE		160	0.408647	1.52206	0.00554785	0.10772	1	1748	tags=22%, list=15%, signal=25%
GOBP_CAMP_METABOLIC_PROCESS	GOBP_CAMP_METABOLIC_PROCESS		16	0.612629	1.52195	0.0539568	0.107726	1	1141	tags=38%, list=10%, signal=41%
GSE21774_CD62L_POS_CD56_DIM_VS_CD62L_NEG_CD56_DIM_NK_CELL_DN	GSE21774_CD62L_POS_CD56_DIM_VS_CD62L_NEG_CD56_DIM_NK_CELL_DN		125	0.421434	1.52138	0.010989	0.108154	1	1845	tags=30%, list=16%, signal=35%
GOBP_VASCULAR_ENDOTHELIAL_GROWTH_FACTOR_RECEPTOR_SIGNALING_PATHWAY	GOBP_VASCULAR_ENDOTHELIAL_GROWTH_FACTOR_RECEPTOR_SIGNALING_PATHWAY		79	0.445971	1.52121	0.0135542	0.108231	1	2780	tags=46%, list=24%, signal=59%
GOMF_MONOSACCHARIDE_BINDING	GOMF_MONOSACCHARIDE_BINDING		49	0.48079	1.52086	0.0333863	0.108456	1	2010	tags=35%, list=17%, signal=42%
GOMF_STRUCTURAL_CONSTITUENT_OF_MUSCLE	GOMF_STRUCTURAL_CONSTITUENT_OF_MUSCLE		28	0.534691	1.52079	0.0499168	0.108439	1	2751	tags=54%, list=23%, signal=70%
GSE9946_LISTERIA_INF_MATURE_VS_PROSTAGLANDINE2_TREATED_MATURE_DC_DN	GSE9946_LISTERIA_INF_MATURE_VS_PROSTAGLANDINE2_TREATED_MATURE_DC_DN		52	0.484517	1.52042	0.0316957	0.1087	1	2421	tags=54%, list=20%, signal=67%
GOBP_POSITIVE_REGULATION_OF_PHAGOCYTOSIS	GOBP_POSITIVE_REGULATION_OF_PHAGOCYTOSIS		52	0.483395	1.51997	0.0357143	0.108989	1	464	tags=15%, list=4%, signal=16%
GSE17721_CTRL_VS_CPG_6H_BMDC_DN	GSE17721_CTRL_VS_CPG_6H_BMDC_DN		147	0.413972	1.51991	0.00424328	0.108964	1	2198	tags=27%, list=19%, signal=32%
HP_ABNORMAL_INTRAOCULAR_PRESSURE	HP_ABNORMAL_INTRAOCULAR_PRESSURE		15	0.61398	1.51982	0.0542907	0.108956	1	1906	tags=33%, list=16%, signal=40%
GSE23321_CENTRAL_MEMORY_VS_NAIVE_CD8_TCELL_UP	GSE23321_CENTRAL_MEMORY_VS_NAIVE_CD8_TCELL_UP		153	0.407041	1.51915	0.00966851	0.109483	1	1289	tags=21%, list=11%, signal=23%
HP_AORTIC_ARCH_ANEURYSM	HP_AORTIC_ARCH_ANEURYSM		15	0.628451	1.51915	0.0468227	0.109403	1	1040	tags=33%, list=9%, signal=37%
GOBP_TISSUE_HOMEOSTASIS	GOBP_TISSUE_HOMEOSTASIS		169	0.39287	1.51896	0.0041958	0.109483	1	2063	tags=30%, list=17%, signal=36%
GSE23568_ID3_TRANSDUCED_VS_ID3_KO_CD8_TCELL_UP	GSE23568_ID3_TRANSDUCED_VS_ID3_KO_CD8_TCELL_UP		162	0.406344	1.51889	0.00277778	0.109478	1	2476	tags=35%, list=21%, signal=43%
GOMF_POLYSACCHARIDE_BINDING	GOMF_POLYSACCHARIDE_BINDING		17	0.603456	1.51844	0.064736	0.10981	1	440	tags=24%, list=4%, signal=24%
HP_RENAL_DUPLICATION	HP_RENAL_DUPLICATION		20	0.567575	1.5183	0.0550622	0.10985	1	1358	tags=30%, list=11%, signal=34%
HP_CORONARY_ARTERY_ATHEROSCLEROSIS	HP_CORONARY_ARTERY_ATHEROSCLEROSIS		37	0.512908	1.51805	0.0377668	0.10997	1	3105	tags=51%, list=26%, signal=69%
HP_APLASIA_HYPOPLASIA_OF_THE_PHALANGES_OF_THE_HAND	HP_APLASIA_HYPOPLASIA_OF_THE_PHALANGES_OF_THE_HAND		187	0.393752	1.51797	0.00134409	0.109954	1	2218	tags=29%, list=19%, signal=36%
PRC1_BMI_UP.V1_UP	PRC1_BMI_UP.V1_UP		102	0.428841	1.5174	0.00732064	0.110387	1	814	tags=18%, list=7%, signal=19%
GOBP_RESPONSE_TO_ZINC_ION	GOBP_RESPONSE_TO_ZINC_ION		26	0.544655	1.51729	0.0540541	0.110401	1	1415	tags=27%, list=12%, signal=31%
GOBP_AUTONOMIC_NERVOUS_SYSTEM_DEVELOPMENT	GOBP_AUTONOMIC_NERVOUS_SYSTEM_DEVELOPMENT		29	0.530315	1.51719	0.0501618	0.110405	1	1352	tags=45%, list=11%, signal=50%
HP_BROAD_RIBS	HP_BROAD_RIBS		16	0.609363	1.51708	0.049236	0.110419	1	758	tags=25%, list=6%, signal=27%
GOBP_HORMONE_BIOSYNTHETIC_PROCESS	GOBP_HORMONE_BIOSYNTHETIC_PROCESS		38	0.502948	1.51695	0.0354267	0.110457	1	2000	tags=37%, list=17%, signal=44%
GSE43957_UNTREATED_VS_NACL_TREATED_ANTI_CD3_CD28_STIM_CD4_TCELL_UP	GSE43957_UNTREATED_VS_NACL_TREATED_ANTI_CD3_CD28_STIM_CD4_TCELL_UP		126	0.418209	1.51695	0.014556	0.11038	1	2177	tags=28%, list=18%, signal=34%
GSE30971_WBP7_HET_VS_KO_MACROPHAGE_2H_LPS_STIM_DN	GSE30971_WBP7_HET_VS_KO_MACROPHAGE_2H_LPS_STIM_DN		154	0.405265	1.51682	0.00436047	0.110424	1	1882	tags=25%, list=16%, signal=29%
GSE13306_TREG_VS_TCONV_SPLEEN_UP	GSE13306_TREG_VS_TCONV_SPLEEN_UP		139	0.413678	1.51675	0.00710227	0.11041	1	2322	tags=31%, list=20%, signal=38%
GSE28449_WT_VS_LRF_KO_GERMINAL_CENTER_BCELL_UP	GSE28449_WT_VS_LRF_KO_GERMINAL_CENTER_BCELL_UP		127	0.412811	1.51641	0.00569801	0.110652	1	297	tags=9%, list=3%, signal=10%
GSE41176_WT_VS_TAK1_KO_UNSTIM_BCELL_UP	GSE41176_WT_VS_TAK1_KO_UNSTIM_BCELL_UP		142	0.413807	1.516	0.00738552	0.110936	1	1475	tags=22%, list=12%, signal=25%
GSE29618_BCELL_VS_MONOCYTE_DAY7_FLU_VACCINE_DN	GSE29618_BCELL_VS_MONOCYTE_DAY7_FLU_VACCINE_DN		163	0.403564	1.51593	0.0109589	0.11092	1	2674	tags=37%, list=23%, signal=47%
GOCC_CLATHRIN_COATED_ENDOCYTIC_VESICLE_MEMBRANE	GOCC_CLATHRIN_COATED_ENDOCYTIC_VESICLE_MEMBRANE		26	0.554914	1.51592	0.0434028	0.110853	1	614	tags=23%, list=5%, signal=24%
GOBP_NEGATIVE_REGULATION_OF_MAPK_CASCADE	GOBP_NEGATIVE_REGULATION_OF_MAPK_CASCADE		129	0.41304	1.51585	0.012931	0.110842	1	1395	tags=19%, list=12%, signal=22%
GOBP_REGULATION_OF_MUSCLE_SYSTEM_PROCESS	GOBP_REGULATION_OF_MUSCLE_SYSTEM_PROCESS		148	0.407505	1.5156	0.00874636	0.110988	1	1964	tags=30%, list=17%, signal=35%
HP_DYSPAREUNIA	HP_DYSPAREUNIA		23	0.558928	1.51533	0.0500835	0.111175	1	1398	tags=39%, list=12%, signal=44%
GOBP_REGULATION_OF_LIPID_TRANSPORT	GOBP_REGULATION_OF_LIPID_TRANSPORT		90	0.439078	1.51526	0.0151057	0.11116	1	1188	tags=22%, list=10%, signal=25%
HP_ABNORMALITY_OF_THE_HUMERORADIAL_JOINT	HP_ABNORMALITY_OF_THE_HUMERORADIAL_JOINT		35	0.522532	1.51521	0.0412371	0.111119	1	1518	tags=40%, list=13%, signal=46%
KEGG_NOTCH_SIGNALING_PATHWAY	KEGG_NOTCH_SIGNALING_PATHWAY		40	0.508788	1.51518	0.0342577	0.111063	1	1756	tags=30%, list=15%, signal=35%
GOBP_ENDOCARDIAL_CUSHION_FORMATION	GOBP_ENDOCARDIAL_CUSHION_FORMATION		17	0.605476	1.5151	0.0475352	0.111057	1	1778	tags=65%, list=15%, signal=76%
GOMF_PEPTIDASE_ACTIVITY	GOMF_PEPTIDASE_ACTIVITY		374	0.367114	1.51448	0.00121359	0.111521	1	1786	tags=23%, list=15%, signal=26%
GOBP_GLAND_DEVELOPMENT	GOBP_GLAND_DEVELOPMENT		285	0.380476	1.51446	0.0012987	0.111458	1	2583	tags=35%, list=22%, signal=44%
HP_REDUCED_VITAL_CAPACITY	HP_REDUCED_VITAL_CAPACITY		16	0.601519	1.51421	0.0516014	0.111612	1	1253	tags=38%, list=11%, signal=42%
GSE22025_TGFB1_VS_TGFB1_AND_PROGESTERONE_TREATED_CD4_TCELL_UP	GSE22025_TGFB1_VS_TGFB1_AND_PROGESTERONE_TREATED_CD4_TCELL_UP		140	0.407434	1.51397	0.00705219	0.11174	1	2419	tags=35%, list=20%, signal=43%
GSE45365_WT_VS_IFNAR_KO_CD8A_DC_MCMV_INFECTION_DN	GSE45365_WT_VS_IFNAR_KO_CD8A_DC_MCMV_INFECTION_DN		104	0.429367	1.51376	0.0148368	0.111852	1	1827	tags=32%, list=15%, signal=37%
HP_ECTOPIC_ANUS	HP_ECTOPIC_ANUS		49	0.485399	1.51337	0.0362438	0.112143	1	1623	tags=33%, list=14%, signal=38%
GOBP_RESPONSE_TO_HYPEROXIA	GOBP_RESPONSE_TO_HYPEROXIA		18	0.595462	1.5132	0.0425139	0.112228	1	1228	tags=39%, list=10%, signal=43%
GSE9509_LPS_VS_LPS_AND_IL10_STIM_IL10_KO_MACROPHAGE_20MIN_UP	GSE9509_LPS_VS_LPS_AND_IL10_STIM_IL10_KO_MACROPHAGE_20MIN_UP		148	0.407593	1.5131	0.00555556	0.112227	1	2405	tags=41%, list=20%, signal=51%
HP_COXA_VALGA	HP_COXA_VALGA		70	0.451664	1.51294	0.0304	0.112297	1	1618	tags=24%, list=14%, signal=28%
GSE4748_CTRL_VS_LPS_AND_CYANOBACTERIUM_LPSLIKE_STIM_DC_3H_DN	GSE4748_CTRL_VS_LPS_AND_CYANOBACTERIUM_LPSLIKE_STIM_DC_3H_DN		163	0.406712	1.51292	0.00708215	0.112244	1	1262	tags=21%, list=11%, signal=24%
GSE37301_HEMATOPOIETIC_STEM_CELL_VS_PRO_BCELL_UP	GSE37301_HEMATOPOIETIC_STEM_CELL_VS_PRO_BCELL_UP		142	0.41142	1.51292	0.0100287	0.112168	1	1992	tags=28%, list=17%, signal=33%
GOBP_REGULATION_OF_REACTIVE_OXYGEN_SPECIES_METABOLIC_PROCESS	GOBP_REGULATION_OF_REACTIVE_OXYGEN_SPECIES_METABOLIC_PROCESS		129	0.413078	1.51272	0.0101744	0.112259	1	1821	tags=25%, list=15%, signal=29%
HP_PROLONGED_BLEEDING_TIME	HP_PROLONGED_BLEEDING_TIME		35	0.516776	1.51253	0.0366826	0.112339	1	2191	tags=40%, list=19%, signal=49%
GOBP_REGULATION_OF_CELL_MATRIX_ADHESION	GOBP_REGULATION_OF_CELL_MATRIX_ADHESION		100	0.436223	1.51226	0.00886263	0.112521	1	1944	tags=35%, list=16%, signal=42%
GOBP_VASCULAR_ENDOTHELIAL_CELL_PROLIFERATION	GOBP_VASCULAR_ENDOTHELIAL_CELL_PROLIFERATION		15	0.61405	1.51224	0.0616822	0.112449	1	1452	tags=40%, list=12%, signal=46%
GOBP_SUBPALLIUM_DEVELOPMENT	GOBP_SUBPALLIUM_DEVELOPMENT		15	0.621646	1.5122	0.0513274	0.112414	1	941	tags=33%, list=8%, signal=36%
GOMF_ACTININ_BINDING	GOMF_ACTININ_BINDING		25	0.549787	1.51198	0.0505051	0.112531	1	1768	tags=44%, list=15%, signal=52%
GSE6259_33D1_POS_VS_DEC205_POS_SPLENIC_DC_DN	GSE6259_33D1_POS_VS_DEC205_POS_SPLENIC_DC_DN		163	0.399812	1.51192	0.00998574	0.112511	1	2712	tags=36%, list=23%, signal=46%
GOBP_NEURON_RECOGNITION	GOBP_NEURON_RECOGNITION		33	0.519735	1.51182	0.0454545	0.112512	1	1409	tags=36%, list=12%, signal=41%
GOBP_MUSCLE_HYPERTROPHY_IN_RESPONSE_TO_STRESS	GOBP_MUSCLE_HYPERTROPHY_IN_RESPONSE_TO_STRESS		15	0.616349	1.5115	0.0591398	0.112727	1	2304	tags=47%, list=20%, signal=58%
HP_HYPERCHOLESTEROLEMIA	HP_HYPERCHOLESTEROLEMIA		44	0.489948	1.51146	0.0527183	0.112679	1	2805	tags=50%, list=24%, signal=65%
HP_ABNORMALITY_OF_COMPLEMENT_SYSTEM	HP_ABNORMALITY_OF_COMPLEMENT_SYSTEM		22	0.570686	1.51118	0.0561983	0.112855	1	1562	tags=32%, list=13%, signal=37%
GSE12392_IFNAR_KO_VS_IFNB_KO_CD8_NEG_SPLEEN_DC_DN	GSE12392_IFNAR_KO_VS_IFNB_KO_CD8_NEG_SPLEEN_DC_DN		154	0.40621	1.51048	0.00577201	0.113438	1	1770	tags=25%, list=15%, signal=29%
GSE17721_12H_VS_24H_LPS_BMDC_UP	GSE17721_12H_VS_24H_LPS_BMDC_UP		169	0.405916	1.5103	0.00968188	0.113528	1	2707	tags=33%, list=23%, signal=42%
GOBP_RECEPTOR_METABOLIC_PROCESS	GOBP_RECEPTOR_METABOLIC_PROCESS		119	0.424349	1.51028	0.0131387	0.113472	1	1964	tags=26%, list=17%, signal=31%
GOBP_NEUROINFLAMMATORY_RESPONSE	GOBP_NEUROINFLAMMATORY_RESPONSE		30	0.526991	1.51026	0.0566667	0.113412	1	2645	tags=50%, list=22%, signal=64%
HP_SUBCUTANEOUS_NODULE	HP_SUBCUTANEOUS_NODULE		72	0.447126	1.51017	0.0243902	0.113425	1	1704	tags=28%, list=14%, signal=32%
GSE21360_SECONDARY_VS_QUATERNARY_MEMORY_CD8_TCELL_UP	GSE21360_SECONDARY_VS_QUATERNARY_MEMORY_CD8_TCELL_UP		145	0.406678	1.51011	0.00991501	0.113393	1	2051	tags=30%, list=17%, signal=36%
GSE20715_0H_VS_24H_OZONE_TLR4_KO_LUNG_DN	GSE20715_0H_VS_24H_OZONE_TLR4_KO_LUNG_DN		162	0.400308	1.51007	0.00141643	0.113341	1	2052	tags=29%, list=17%, signal=35%
GOBP_POSITIVE_REGULATION_OF_BINDING	GOBP_POSITIVE_REGULATION_OF_BINDING		136	0.411904	1.50893	0.00854701	0.11431	1	1505	tags=20%, list=13%, signal=22%
HP_MILDLY_ELEVATED_CREATINE_KINASE	HP_MILDLY_ELEVATED_CREATINE_KINASE		38	0.501339	1.50889	0.0299003	0.114268	1	1720	tags=32%, list=15%, signal=37%
LI_PBMC_MENACTRA_AGE_18_45YO_CORRELATED_WITH_ANTI_DT_ANTIBODY_3DY_NEGATIVE	LI_PBMC_MENACTRA_AGE_18_45YO_CORRELATED_WITH_ANTI_DT_ANTIBODY_3DY_NEGATIVE		21	0.565299	1.50878	0.0528109	0.114302	1	1499	tags=29%, list=13%, signal=33%
HOFT_CD4_POSITIVE_ALPHA_BETA_MEMORY_T_CELL_BCG_VACCINE_AGE_18_45YO_ID_56D_TOP_100_DEG_AFTER_IN_VITRO_RE_STIMULATION_UP	HOFT_CD4_POSITIVE_ALPHA_BETA_MEMORY_T_CELL_BCG_VACCINE_AGE_18_45YO_ID_56D_TOP_100_DEG_AFTER_IN_VITRO_RE_STIMULATION_UP		33	0.51245	1.50855	0.0477759	0.114413	1	2101	tags=42%, list=18%, signal=51%
HP_CORNEAL_NEOVASCULARIZATION	HP_CORNEAL_NEOVASCULARIZATION		15	0.601572	1.50848	0.0665468	0.114399	1	1047	tags=33%, list=9%, signal=37%
HP_PIERRE_ROBIN_SEQUENCE	HP_PIERRE_ROBIN_SEQUENCE		15	0.610299	1.50842	0.0531732	0.11436	1	1730	tags=33%, list=15%, signal=39%
GOBP_REGULATION_OF_LIPID_LOCALIZATION	GOBP_REGULATION_OF_LIPID_LOCALIZATION		114	0.416124	1.50797	0.017931	0.114688	1	1287	tags=22%, list=11%, signal=24%
HP_GASTROINTESTINAL_OBSTRUCTION	HP_GASTROINTESTINAL_OBSTRUCTION		45	0.486848	1.50797	0.0263158	0.114612	1	1568	tags=29%, list=13%, signal=33%
GOBP_POSITIVE_REGULATION_OF_MAPK_CASCADE	GOBP_POSITIVE_REGULATION_OF_MAPK_CASCADE		360	0.371346	1.50776	0	0.114727	1	1502	tags=24%, list=13%, signal=27%
GOBP_POSITIVE_REGULATION_OF_ACTIN_FILAMENT_BUNDLE_ASSEMBLY	GOBP_POSITIVE_REGULATION_OF_ACTIN_FILAMENT_BUNDLE_ASSEMBLY		48	0.48165	1.50766	0.0421394	0.114729	1	2711	tags=42%, list=23%, signal=54%
GSE22025_TGFB1_VS_TGFB1_AND_PROGESTERONE_TREATED_CD4_TCELL_DN	GSE22025_TGFB1_VS_TGFB1_AND_PROGESTERONE_TREATED_CD4_TCELL_DN		126	0.411913	1.50762	0.00904977	0.11468	1	1220	tags=21%, list=10%, signal=23%
GOBP_MAMMARY_GLAND_EPITHELIUM_DEVELOPMENT	GOBP_MAMMARY_GLAND_EPITHELIUM_DEVELOPMENT		48	0.485898	1.50761	0.0249169	0.114615	1	2381	tags=42%, list=20%, signal=52%
GSE22601_DOUBLE_NEGATIVE_VS_CD8_SINGLE_POSITIVE_THYMOCYTE_UP	GSE22601_DOUBLE_NEGATIVE_VS_CD8_SINGLE_POSITIVE_THYMOCYTE_UP		119	0.421659	1.5075	0.0199147	0.114643	1	2289	tags=30%, list=19%, signal=37%
GSE13522_CTRL_VS_T_CRUZI_BRAZIL_STRAIN_INF_SKIN_UP	GSE13522_CTRL_VS_T_CRUZI_BRAZIL_STRAIN_INF_SKIN_UP		99	0.434391	1.5075	0.0169231	0.114565	1	2115	tags=27%, list=18%, signal=33%
GSE36888_STAT5_AB_KNOCKIN_VS_WT_TCELL_IL2_TREATED_2H_DN	GSE36888_STAT5_AB_KNOCKIN_VS_WT_TCELL_IL2_TREATED_2H_DN		155	0.404788	1.50739	0.00860832	0.114599	1	1603	tags=26%, list=14%, signal=30%
HP_MICROMELIA	HP_MICROMELIA		81	0.447771	1.50739	0.0148588	0.114524	1	2007	tags=30%, list=17%, signal=35%
HP_LONG_FOOT	HP_LONG_FOOT		24	0.563766	1.50735	0.0592217	0.114469	1	1320	tags=33%, list=11%, signal=37%
GOBP_POSITIVE_REGULATION_OF_TUMOR_NECROSIS_FACTOR_SUPERFAMILY_CYTOKINE_PRODUCTION	GOBP_POSITIVE_REGULATION_OF_TUMOR_NECROSIS_FACTOR_SUPERFAMILY_CYTOKINE_PRODUCTION		63	0.463267	1.50691	0.021148	0.114811	1	1821	tags=25%, list=15%, signal=30%
GOBP_REGULATION_OF_RECEPTOR_MEDIATED_ENDOCYTOSIS	GOBP_REGULATION_OF_RECEPTOR_MEDIATED_ENDOCYTOSIS		74	0.455326	1.5069	0.0185759	0.114744	1	2341	tags=32%, list=20%, signal=40%
HP_HYPEREXTENSIBILITY_OF_THE_KNEE	HP_HYPEREXTENSIBILITY_OF_THE_KNEE		24	0.564117	1.50684	0.0469799	0.11472	1	377	tags=17%, list=3%, signal=17%
GSE6259_DEC205_POS_DC_VS_CD8_TCELL_DN	GSE6259_DEC205_POS_DC_VS_CD8_TCELL_DN		105	0.426169	1.50661	0.0137825	0.11485	1	2326	tags=36%, list=20%, signal=45%
HOWARD_PBMC_INACT_MONOV_INFLUENZA_A_INDONESIA_05_2005_H5N1_AGE_19_39YO_AS03_ADJUVANT_VS_BUFFER_1DY_UP	HOWARD_PBMC_INACT_MONOV_INFLUENZA_A_INDONESIA_05_2005_H5N1_AGE_19_39YO_AS03_ADJUVANT_VS_BUFFER_1DY_UP		263	0.380479	1.50655	0.00769231	0.11483	1	2634	tags=36%, list=22%, signal=45%
GOBP_REGULATION_OF_CELL_CELL_ADHESION_MEDIATED_BY_CADHERIN	GOBP_REGULATION_OF_CELL_CELL_ADHESION_MEDIATED_BY_CADHERIN		15	0.613245	1.50643	0.0601375	0.114864	1	2667	tags=53%, list=23%, signal=69%
GOBP_REGULATION_OF_PLATELET_ACTIVATION	GOBP_REGULATION_OF_PLATELET_ACTIVATION		29	0.525761	1.50607	0.0474576	0.115074	1	710	tags=28%, list=6%, signal=29%
GSE29949_MICROGLIA_VS_DC_BRAIN_DN	GSE29949_MICROGLIA_VS_DC_BRAIN_DN		131	0.412217	1.50582	0.0114286	0.115222	1	1911	tags=27%, list=16%, signal=32%
GOBP_REGULATION_OF_GRANULOCYTE_CHEMOTAXIS	GOBP_REGULATION_OF_GRANULOCYTE_CHEMOTAXIS		39	0.502016	1.50574	0.0425532	0.115213	1	1614	tags=28%, list=14%, signal=33%
GOBP_REGULATION_OF_DNA_BINDING	GOBP_REGULATION_OF_DNA_BINDING		82	0.435447	1.5057	0.0219298	0.115183	1	1170	tags=16%, list=10%, signal=17%
GSE3982_CTRL_VS_LPS_48H_DC_DN	GSE3982_CTRL_VS_LPS_48H_DC_DN		163	0.405523	1.50556	0.00275482	0.115231	1	1616	tags=20%, list=14%, signal=22%
GOBP_NEGATIVE_REGULATION_OF_CELL_MATRIX_ADHESION	GOBP_NEGATIVE_REGULATION_OF_CELL_MATRIX_ADHESION		30	0.524076	1.50549	0.0553691	0.115217	1	1826	tags=43%, list=15%, signal=51%
HP_ABNORMALITY_OF_PRIMARY_TEETH	HP_ABNORMALITY_OF_PRIMARY_TEETH		53	0.477603	1.50549	0.0318471	0.115138	1	2407	tags=43%, list=20%, signal=54%
GOBP_REGULATION_OF_BODY_FLUID_LEVELS	GOBP_REGULATION_OF_BODY_FLUID_LEVELS		335	0.371982	1.50548	0.0012987	0.115068	1	1454	tags=22%, list=12%, signal=24%
GOMF_PROTEIN_TYROSINE_KINASE_ACTIVITY	GOMF_PROTEIN_TYROSINE_KINASE_ACTIVITY		112	0.41725	1.50531	0.0135952	0.115149	1	2674	tags=39%, list=23%, signal=50%
HP_LIMITED_ELBOW_EXTENSION	HP_LIMITED_ELBOW_EXTENSION		27	0.547843	1.50482	0.0441426	0.115516	1	614	tags=22%, list=5%, signal=23%
GSE14026_TH1_VS_TH17_UP	GSE14026_TH1_VS_TH17_UP		110	0.42148	1.50342	0.0246734	0.116676	1	2357	tags=25%, list=20%, signal=30%
GOBP_CELLULAR_RESPONSE_TO_FATTY_ACID	GOBP_CELLULAR_RESPONSE_TO_FATTY_ACID		23	0.550304	1.50326	0.0519713	0.116728	1	1819	tags=35%, list=15%, signal=41%
GSE2826_WT_VS_BTK_KO_BCELL_DN	GSE2826_WT_VS_BTK_KO_BCELL_DN		148	0.396814	1.50305	0.00969529	0.116857	1	2735	tags=38%, list=23%, signal=49%
HP_INCREASED_BLOOD_PRESSURE	HP_INCREASED_BLOOD_PRESSURE		271	0.379764	1.50303	0.00263852	0.116786	1	2000	tags=25%, list=17%, signal=30%
GOBP_ANIMAL_ORGAN_MATURATION	GOBP_ANIMAL_ORGAN_MATURATION		21	0.568403	1.503	0.0500864	0.116736	1	1989	tags=52%, list=17%, signal=63%
GSE16266_CTRL_VS_LPS_STIM_MEF_UP	GSE16266_CTRL_VS_LPS_STIM_MEF_UP		170	0.402519	1.50288	0.00280899	0.116788	1	1916	tags=28%, list=16%, signal=33%
GOBP_MIDBRAIN_DEVELOPMENT	GOBP_MIDBRAIN_DEVELOPMENT		56	0.45852	1.50249	0.0366826	0.117048	1	1485	tags=21%, list=13%, signal=24%
LI_PBMC_MENACTRA_AGE_18_45YO_CORRELATED_WITH_ANTI_POLYSACCHARIDE_ANTIBODY_3DY_POSITIVE	LI_PBMC_MENACTRA_AGE_18_45YO_CORRELATED_WITH_ANTI_POLYSACCHARIDE_ANTIBODY_3DY_POSITIVE		45	0.48444	1.50245	0.0382775	0.117008	1	1813	tags=31%, list=15%, signal=37%
GOBP_MODULATION_OF_EXCITATORY_POSTSYNAPTIC_POTENTIAL	GOBP_MODULATION_OF_EXCITATORY_POSTSYNAPTIC_POTENTIAL		24	0.543831	1.50225	0.058319	0.117086	1	1206	tags=38%, list=10%, signal=42%
HP_NECK_MUSCLE_WEAKNESS	HP_NECK_MUSCLE_WEAKNESS		45	0.481649	1.50215	0.0376068	0.117087	1	2966	tags=42%, list=25%, signal=56%
GSE18281_SUBCAPSULAR_CORTICAL_REGION_VS_WHOLE_MEDULLA_THYMUS_DN	GSE18281_SUBCAPSULAR_CORTICAL_REGION_VS_WHOLE_MEDULLA_THYMUS_DN		96	0.428921	1.50196	0.025	0.117182	1	1273	tags=26%, list=11%, signal=29%
HP_ABNORMAL_STERNUM_MORPHOLOGY	HP_ABNORMAL_STERNUM_MORPHOLOGY		319	0.371001	1.50131	0.00250627	0.117717	1	2007	tags=24%, list=17%, signal=28%
GSE42088_2H_VS_24H_LEISHMANIA_INF_DC_UP	GSE42088_2H_VS_24H_LEISHMANIA_INF_DC_UP		159	0.394289	1.50119	0.00565771	0.117736	1	1765	tags=19%, list=15%, signal=22%
GOMF_VOLTAGE_GATED_CALCIUM_CHANNEL_ACTIVITY	GOMF_VOLTAGE_GATED_CALCIUM_CHANNEL_ACTIVITY		20	0.573459	1.50117	0.051458	0.11769	1	845	tags=30%, list=7%, signal=32%
GSE26928_CENTR_MEMORY_VS_CXCR5_POS_CD4_TCELL_UP	GSE26928_CENTR_MEMORY_VS_CXCR5_POS_CD4_TCELL_UP		113	0.417639	1.50111	0.0183357	0.117664	1	2480	tags=39%, list=21%, signal=49%
GSE37532_TREG_VS_TCONV_CD4_TCELL_FROM_VISCERAL_ADIPOSE_TISSUE_UP	GSE37532_TREG_VS_TCONV_CD4_TCELL_FROM_VISCERAL_ADIPOSE_TISSUE_UP		64	0.456607	1.50088	0.0275081	0.117798	1	852	tags=31%, list=7%, signal=33%
HP_APLASIA_HYPOPLASIA_INVOLVING_THE_METACARPAL_BONES	HP_APLASIA_HYPOPLASIA_INVOLVING_THE_METACARPAL_BONES		98	0.425158	1.5008	0.0159884	0.117798	1	1612	tags=28%, list=14%, signal=32%
GSE11057_PBMC_VS_MEM_CD4_TCELL_UP	GSE11057_PBMC_VS_MEM_CD4_TCELL_UP		162	0.397657	1.50064	0.0138696	0.117859	1	2634	tags=36%, list=22%, signal=46%
GOBP_RESPONSE_TO_BACTERIUM	GOBP_RESPONSE_TO_BACTERIUM		366	0.367671	1.50053	0	0.117889	1	1977	tags=29%, list=17%, signal=34%
HP_THIN_EYEBROW	HP_THIN_EYEBROW		49	0.48512	1.50048	0.0294574	0.117849	1	1837	tags=35%, list=16%, signal=41%
GOBP_PLACENTA_BLOOD_VESSEL_DEVELOPMENT	GOBP_PLACENTA_BLOOD_VESSEL_DEVELOPMENT		21	0.569345	1.50039	0.0524476	0.117847	1	2552	tags=48%, list=22%, signal=61%
GOBP_POSITIVE_REGULATION_OF_INSULIN_SECRETION	GOBP_POSITIVE_REGULATION_OF_INSULIN_SECRETION		41	0.495188	1.49976	0.0411184	0.118365	1	991	tags=24%, list=8%, signal=27%
GSE40666_STAT1_KO_VS_STAT4_KO_CD8_TCELL_DN	GSE40666_STAT1_KO_VS_STAT4_KO_CD8_TCELL_DN		77	0.44661	1.49976	0.0183767	0.118293	1	1499	tags=35%, list=13%, signal=40%
GSE19772_CTRL_VS_HCMV_INF_MONOCYTES_AND_PI3K_INHIBITION_DN	GSE19772_CTRL_VS_HCMV_INF_MONOCYTES_AND_PI3K_INHIBITION_DN		139	0.404788	1.49945	0.0110957	0.118488	1	1738	tags=23%, list=15%, signal=27%
GOBP_MOLTING_CYCLE	GOBP_MOLTING_CYCLE		65	0.455226	1.49945	0.0344828	0.118414	1	1081	tags=25%, list=9%, signal=27%
HP_PROXIMAL_MUSCLE_WEAKNESS	HP_PROXIMAL_MUSCLE_WEAKNESS		134	0.414592	1.49944	0.0113475	0.118341	1	1720	tags=20%, list=15%, signal=23%
GOBP_CELL_CELL_ADHESION_MEDIATED_BY_CADHERIN	GOBP_CELL_CELL_ADHESION_MEDIATED_BY_CADHERIN		21	0.561517	1.49912	0.0424448	0.118559	1	2667	tags=48%, list=23%, signal=61%
GOMF_SMAD_BINDING	GOMF_SMAD_BINDING		61	0.460169	1.49891	0.0305466	0.118686	1	1888	tags=33%, list=16%, signal=39%
GSE360_HIGH_DOSE_B_MALAYI_VS_M_TUBERCULOSIS_DC_DN	GSE360_HIGH_DOSE_B_MALAYI_VS_M_TUBERCULOSIS_DC_DN		149	0.403851	1.49886	0.00681199	0.118666	1	1645	tags=23%, list=14%, signal=26%
HP_PERIPHERAL_PULMONARY_ARTERY_STENOSIS	HP_PERIPHERAL_PULMONARY_ARTERY_STENOSIS		22	0.554109	1.49837	0.0452342	0.119036	1	1404	tags=27%, list=12%, signal=31%
GOCC_INTRINSIC_COMPONENT_OF_POSTSYNAPTIC_SPECIALIZATION_MEMBRANE	GOCC_INTRINSIC_COMPONENT_OF_POSTSYNAPTIC_SPECIALIZATION_MEMBRANE		21	0.557218	1.49756	0.0491803	0.119749	1	1009	tags=29%, list=9%, signal=31%
GSE7218_UNSTIM_VS_ANTIGEN_STIM_THROUGH_IGG_BCELL_DN	GSE7218_UNSTIM_VS_ANTIGEN_STIM_THROUGH_IGG_BCELL_DN		136	0.408278	1.49728	0.00730994	0.119932	1	2446	tags=45%, list=21%, signal=56%
GSE32986_CURDLAN_LOWDOSE_VS_CURDLAN_HIGHDOSE_STIM_DC_DN	GSE32986_CURDLAN_LOWDOSE_VS_CURDLAN_HIGHDOSE_STIM_DC_DN		172	0.39277	1.49702	0.00542005	0.120095	1	1252	tags=19%, list=11%, signal=21%
GOBP_DEVELOPMENT_OF_PRIMARY_SEXUAL_CHARACTERISTICS	GOBP_DEVELOPMENT_OF_PRIMARY_SEXUAL_CHARACTERISTICS		130	0.41041	1.49688	0.0142248	0.120139	1	1651	tags=30%, list=14%, signal=34%
HALLMARK_IL2_STAT5_SIGNALING	HALLMARK_IL2_STAT5_SIGNALING		173	0.393348	1.49671	0.00707214	0.120231	1	1594	tags=29%, list=13%, signal=33%
GSE9988_ANTI_TREM1_VS_ANTI_TREM1_AND_LPS_MONOCYTE_DN	GSE9988_ANTI_TREM1_VS_ANTI_TREM1_AND_LPS_MONOCYTE_DN		144	0.400077	1.49659	0.00428571	0.120271	1	1039	tags=16%, list=9%, signal=17%
GSE22443_NAIVE_VS_ACT_AND_IL2_TREATED_CD8_TCELL_UP	GSE22443_NAIVE_VS_ACT_AND_IL2_TREATED_CD8_TCELL_UP		126	0.410442	1.49607	0.0176471	0.12067	1	2265	tags=40%, list=19%, signal=49%
GSE22140_GERMFREE_VS_SPF_ARTHRITIC_MOUSE_CD4_TCELL_UP	GSE22140_GERMFREE_VS_SPF_ARTHRITIC_MOUSE_CD4_TCELL_UP		160	0.39692	1.49596	0.00424328	0.120685	1	1825	tags=21%, list=15%, signal=25%
GSE20715_WT_VS_TLR4_KO_48H_OZONE_LUNG_UP	GSE20715_WT_VS_TLR4_KO_48H_OZONE_LUNG_UP		154	0.397133	1.49575	0.0113154	0.120805	1	1241	tags=19%, list=11%, signal=21%
GOBP_LIVER_MORPHOGENESIS	GOBP_LIVER_MORPHOGENESIS		17	0.605429	1.49544	0.0570934	0.120995	1	2472	tags=47%, list=21%, signal=59%
HP_RETROGNATHIA	HP_RETROGNATHIA		217	0.379783	1.49525	0	0.121107	1	1071	tags=15%, list=9%, signal=16%
GSE22140_HEALTHY_VS_ARTHRITIC_MOUSE_CD4_TCELL_UP	GSE22140_HEALTHY_VS_ARTHRITIC_MOUSE_CD4_TCELL_UP		157	0.396937	1.49513	0.00696379	0.12114	1	2558	tags=29%, list=22%, signal=37%
GSE22935_UNSTIM_VS_48H_MBOVIS_BCG_STIM_MACROPHAGE_UP	GSE22935_UNSTIM_VS_48H_MBOVIS_BCG_STIM_MACROPHAGE_UP		108	0.420072	1.49503	0.016129	0.121148	1	2143	tags=35%, list=18%, signal=43%
GSE22229_UNTREATED_VS_IMMUNOSUPP_THERAPY_RENAL_TRANSPLANT_PATIENT_PBMC_DN	GSE22229_UNTREATED_VS_IMMUNOSUPP_THERAPY_RENAL_TRANSPLANT_PATIENT_PBMC_DN		158	0.398121	1.4948	0.00143885	0.121292	1	2195	tags=33%, list=19%, signal=40%
GOBP_ACTOMYOSIN_STRUCTURE_ORGANIZATION	GOBP_ACTOMYOSIN_STRUCTURE_ORGANIZATION		142	0.404047	1.49477	0.0127298	0.12124	1	2711	tags=37%, list=23%, signal=47%
HP_ARTERIAL_STENOSIS	HP_ARTERIAL_STENOSIS		65	0.44793	1.49456	0.0273141	0.121366	1	1989	tags=29%, list=17%, signal=35%
HP_BILIARY_TRACT_ABNORMALITY	HP_BILIARY_TRACT_ABNORMALITY		64	0.454551	1.49379	0.0322581	0.122018	1	1776	tags=23%, list=15%, signal=27%
KRAS.PROSTATE_UP.V1_DN	KRAS.PROSTATE_UP.V1_DN		70	0.441046	1.49367	0.0298742	0.122064	1	1687	tags=31%, list=14%, signal=36%
GOBP_REGULATION_OF_CARBOHYDRATE_BIOSYNTHETIC_PROCESS	GOBP_REGULATION_OF_CARBOHYDRATE_BIOSYNTHETIC_PROCESS		68	0.453391	1.49361	0.0267062	0.122043	1	1690	tags=24%, list=14%, signal=27%
GOBP_MACROPHAGE_ACTIVATION	GOBP_MACROPHAGE_ACTIVATION		73	0.443522	1.49344	0.0336391	0.122131	1	1821	tags=26%, list=15%, signal=31%
HP_OCULOMOTOR_NERVE_PALSY	HP_OCULOMOTOR_NERVE_PALSY		21	0.55821	1.49309	0.0561404	0.122385	1	2105	tags=38%, list=18%, signal=46%
GOBP_SKELETAL_MUSCLE_ORGAN_DEVELOPMENT	GOBP_SKELETAL_MUSCLE_ORGAN_DEVELOPMENT		105	0.415666	1.49284	0.0221893	0.122526	1	1867	tags=35%, list=16%, signal=41%
GSE17721_POLYIC_VS_PAM3CSK4_1H_BMDC_DN	GSE17721_POLYIC_VS_PAM3CSK4_1H_BMDC_DN		154	0.398842	1.49198	0.0167598	0.123242	1	985	tags=17%, list=8%, signal=18%
LI_PBMC_MENACTRA_AGE_18_45YO_ANTI_DT_ANTIBODY_CORRELATION_PROFILE_3DY_UP	LI_PBMC_MENACTRA_AGE_18_45YO_ANTI_DT_ANTIBODY_CORRELATION_PROFILE_3DY_UP		16	0.609198	1.49197	0.0691489	0.123173	1	1749	tags=50%, list=15%, signal=59%
GOBP_CELL_FATE_SPECIFICATION	GOBP_CELL_FATE_SPECIFICATION		36	0.502378	1.49185	0.0397351	0.1232	1	1687	tags=47%, list=14%, signal=55%
GSE9878_CTRL_VS_EBF_TRANSDUCED_PAX5_KO_PRO_BCELL_UP	GSE9878_CTRL_VS_EBF_TRANSDUCED_PAX5_KO_PRO_BCELL_UP		146	0.401128	1.49165	0.011976	0.123318	1	2647	tags=36%, list=22%, signal=45%
GSE23925_DARK_ZONE_VS_NAIVE_BCELL_DN	GSE23925_DARK_ZONE_VS_NAIVE_BCELL_DN		160	0.396845	1.49151	0.00702247	0.123388	1	2088	tags=28%, list=18%, signal=33%
GSE22886_CD8_VS_CD4_NAIVE_TCELL_DN	GSE22886_CD8_VS_CD4_NAIVE_TCELL_DN		131	0.404673	1.49139	0.0128755	0.123423	1	2956	tags=40%, list=25%, signal=53%
GOCC_T_TUBULE	GOCC_T_TUBULE		32	0.508778	1.49116	0.0587219	0.123546	1	1721	tags=31%, list=15%, signal=36%
BMI1_DN_MEL18_DN.V1_DN	BMI1_DN_MEL18_DN.V1_DN		88	0.430823	1.49099	0.0314286	0.123636	1	1341	tags=23%, list=11%, signal=25%
GSE25088_CTRL_VS_IL4_STIM_MACROPHAGE_DN	GSE25088_CTRL_VS_IL4_STIM_MACROPHAGE_DN		144	0.398633	1.49081	0.00864553	0.123738	1	2403	tags=32%, list=20%, signal=40%
GOBP_EMBRYONIC_FORELIMB_MORPHOGENESIS	GOBP_EMBRYONIC_FORELIMB_MORPHOGENESIS		16	0.612518	1.49063	0.0521739	0.123841	1	2206	tags=63%, list=19%, signal=77%
GOBP_REGULATION_OF_CELL_PROJECTION_ORGANIZATION	GOBP_REGULATION_OF_CELL_PROJECTION_ORGANIZATION		468	0.359978	1.4906	0	0.12378	1	2100	tags=26%, list=18%, signal=31%
HP_LIMITATION_OF_JOINT_MOBILITY	HP_LIMITATION_OF_JOINT_MOBILITY		277	0.375528	1.49038	0.00262123	0.123901	1	1336	tags=21%, list=11%, signal=23%
HP_ABNORMAL_SYNAPTIC_TRANSMISSION_AT_THE_NEUROMUSCULAR_JUNCTION	HP_ABNORMAL_SYNAPTIC_TRANSMISSION_AT_THE_NEUROMUSCULAR_JUNCTION		66	0.454449	1.49018	0.0189274	0.12403	1	1253	tags=20%, list=11%, signal=22%
HP_PORENCEPHALIC_CYST	HP_PORENCEPHALIC_CYST		20	0.572796	1.49006	0.0603015	0.124056	1	1410	tags=40%, list=12%, signal=45%
HP_CONTRACTURES_OF_THE_JOINTS_OF_THE_UPPER_LIMBS	HP_CONTRACTURES_OF_THE_JOINTS_OF_THE_UPPER_LIMBS		207	0.390726	1.48967	0.00409277	0.124362	1	1549	tags=23%, list=13%, signal=26%
HP_TOXEMIA_OF_PREGNANCY	HP_TOXEMIA_OF_PREGNANCY		16	0.592565	1.48965	0.0533563	0.124304	1	1402	tags=50%, list=12%, signal=57%
HP_GENERALIZED_JOINT_LAXITY	HP_GENERALIZED_JOINT_LAXITY		29	0.530148	1.48963	0.0409165	0.124242	1	1117	tags=24%, list=9%, signal=27%
HP_RIB_FUSION	HP_RIB_FUSION		18	0.575004	1.4894	0.0557554	0.124386	1	1756	tags=33%, list=15%, signal=39%
GSE9006_1MONTH_VS_4MONTH_POST_TYPE_1_DIABETES_DX_PBMC_DN	GSE9006_1MONTH_VS_4MONTH_POST_TYPE_1_DIABETES_DX_PBMC_DN		105	0.417422	1.48923	0.0240601	0.124456	1	1013	tags=17%, list=9%, signal=19%
GOBP_POSITIVE_REGULATION_OF_TRANSMEMBRANE_TRANSPORT	GOBP_POSITIVE_REGULATION_OF_TRANSMEMBRANE_TRANSPORT		131	0.404863	1.48907	0.0188953	0.124516	1	1603	tags=25%, list=14%, signal=29%
GSE29164_UNTREATED_VS_CD8_TCELL_AND_IL12_TREATED_MELANOMA_DAY3_UP	GSE29164_UNTREATED_VS_CD8_TCELL_AND_IL12_TREATED_MELANOMA_DAY3_UP		163	0.395912	1.4886	0.00843882	0.124897	1	3272	tags=40%, list=28%, signal=55%
GCNP_SHH_UP_LATE.V1_DN	GCNP_SHH_UP_LATE.V1_DN		125	0.411202	1.48697	0.0156695	0.12647	1	1974	tags=31%, list=17%, signal=37%
GSE29614_DAY3_VS_DAY7_TIV_FLU_VACCINE_PBMC_UP	GSE29614_DAY3_VS_DAY7_TIV_FLU_VACCINE_PBMC_UP		58	0.45431	1.48696	0.0328638	0.126398	1	1779	tags=38%, list=15%, signal=44%
GOBP_CELLULAR_RESPONSE_TO_KETONE	GOBP_CELLULAR_RESPONSE_TO_KETONE		66	0.448693	1.48673	0.0212121	0.126529	1	1933	tags=32%, list=16%, signal=38%
GSE29615_CTRL_VS_LAIV_FLU_VACCINE_PBMC_UP	GSE29615_CTRL_VS_LAIV_FLU_VACCINE_PBMC_UP		121	0.409369	1.48671	0.0115607	0.12648	1	1435	tags=21%, list=12%, signal=24%
GSE39820_CTRL_VS_IL1B_IL6_CD4_TCELL_DN	GSE39820_CTRL_VS_IL1B_IL6_CD4_TCELL_DN		160	0.396091	1.48655	0.00701262	0.126552	1	2054	tags=26%, list=17%, signal=31%
GOBP_METANEPHROS_DEVELOPMENT	GOBP_METANEPHROS_DEVELOPMENT		53	0.476718	1.48645	0.0373377	0.126565	1	1037	tags=38%, list=9%, signal=41%
GSE18791_CTRL_VS_NEWCASTLE_VIRUS_DC_2H_DN	GSE18791_CTRL_VS_NEWCASTLE_VIRUS_DC_2H_DN		100	0.418599	1.48615	0.0102041	0.126802	1	1270	tags=23%, list=11%, signal=26%
KRAS.BREAST_UP.V1_UP	KRAS.BREAST_UP.V1_UP		64	0.445088	1.48613	0.0367412	0.126736	1	1396	tags=31%, list=12%, signal=35%
HALLMARK_ESTROGEN_RESPONSE_EARLY	HALLMARK_ESTROGEN_RESPONSE_EARLY		149	0.40431	1.48611	0.0112835	0.126667	1	2794	tags=38%, list=24%, signal=49%
GSE5589_WT_VS_IL6_KO_LPS_STIM_MACROPHAGE_45MIN_DN	GSE5589_WT_VS_IL6_KO_LPS_STIM_MACROPHAGE_45MIN_DN		159	0.392366	1.48581	0.0157593	0.126926	1	2354	tags=31%, list=20%, signal=38%
HP_CHRONIC_LUNG_DISEASE	HP_CHRONIC_LUNG_DISEASE		25	0.542368	1.48565	0.0638655	0.127	1	1148	tags=36%, list=10%, signal=40%
GOBP_BONE_MATURATION	GOBP_BONE_MATURATION		18	0.585698	1.48549	0.0656814	0.127089	1	1989	tags=56%, list=17%, signal=67%
GSE13485_CTRL_VS_DAY1_YF17D_VACCINE_PBMC_DN	GSE13485_CTRL_VS_DAY1_YF17D_VACCINE_PBMC_DN		52	0.465871	1.48545	0.0429253	0.127053	1	1720	tags=38%, list=15%, signal=45%
GOMF_COPPER_ION_BINDING	GOMF_COPPER_ION_BINDING		40	0.490827	1.48532	0.0366057	0.127101	1	2651	tags=45%, list=22%, signal=58%
GOBP_NEGATIVE_REGULATION_OF_CATION_TRANSMEMBRANE_TRANSPORT	GOBP_NEGATIVE_REGULATION_OF_CATION_TRANSMEMBRANE_TRANSPORT		52	0.474222	1.48528	0.0267296	0.127051	1	1224	tags=25%, list=10%, signal=28%
GSE29164_UNTREATED_VS_CD8_TCELL_TREATED_MELANOMA_DAY7_DN	GSE29164_UNTREATED_VS_CD8_TCELL_TREATED_MELANOMA_DAY7_DN		132	0.406246	1.48484	0.0131579	0.12738	1	2665	tags=39%, list=23%, signal=49%
HP_ABNORMALITY_OF_CRANIAL_SUTURES	HP_ABNORMALITY_OF_CRANIAL_SUTURES		231	0.378861	1.48471	0.00268456	0.127419	1	2300	tags=27%, list=19%, signal=33%
GSE46606_UNSTIM_VS_CD40L_IL2_IL5_1DAY_STIMULATED_IRF4HIGH_SORTED_BCELL_DN	GSE46606_UNSTIM_VS_CD40L_IL2_IL5_1DAY_STIMULATED_IRF4HIGH_SORTED_BCELL_DN		163	0.397432	1.48465	0.0111732	0.127408	1	1228	tags=18%, list=10%, signal=20%
GOMF_MODIFIED_AMINO_ACID_BINDING	GOMF_MODIFIED_AMINO_ACID_BINDING		51	0.461788	1.48441	0.029316	0.127567	1	2235	tags=35%, list=19%, signal=43%
GOBP_BIOLOGICAL_PROCESS_INVOLVED_IN_INTERACTION_WITH_SYMBIONT	GOBP_BIOLOGICAL_PROCESS_INVOLVED_IN_INTERACTION_WITH_SYMBIONT		59	0.452996	1.48439	0.0377668	0.1275	1	773	tags=19%, list=7%, signal=20%
GOBP_FOREBRAIN_NEURON_DEVELOPMENT	GOBP_FOREBRAIN_NEURON_DEVELOPMENT		16	0.591048	1.48417	0.0638298	0.127641	1	2174	tags=50%, list=18%, signal=61%
GOBP_EPIDERMIS_MORPHOGENESIS	GOBP_EPIDERMIS_MORPHOGENESIS		20	0.580456	1.48408	0.0666667	0.127658	1	1006	tags=45%, list=9%, signal=49%
HP_ELBOW_FLEXION_CONTRACTURE	HP_ELBOW_FLEXION_CONTRACTURE		56	0.461984	1.48376	0.0478395	0.127897	1	1320	tags=36%, list=11%, signal=40%
GSE15659_RESTING_VS_ACTIVATED_TREG_UP	GSE15659_RESTING_VS_ACTIVATED_TREG_UP		106	0.416023	1.48363	0.0104167	0.127953	1	2072	tags=26%, list=18%, signal=32%
GOBP_IMMUNOGLOBULIN_PRODUCTION	GOBP_IMMUNOGLOBULIN_PRODUCTION		96	0.426223	1.48356	0.0187793	0.127934	1	75	tags=6%, list=1%, signal=6%
GSE29615_CTRL_VS_DAY7_LAIV_FLU_VACCINE_PBMC_DN	GSE29615_CTRL_VS_DAY7_LAIV_FLU_VACCINE_PBMC_DN		86	0.428262	1.48326	0.0276074	0.128158	1	1849	tags=27%, list=16%, signal=31%
GSE22103_UNSTIM_VS_LPS_STIM_NEUTROPHIL_DN	GSE22103_UNSTIM_VS_LPS_STIM_NEUTROPHIL_DN		142	0.397506	1.48266	0.010929	0.128624	1	1922	tags=30%, list=16%, signal=35%
GOBP_REGULATION_OF_SYSTEM_PROCESS	GOBP_REGULATION_OF_SYSTEM_PROCESS		333	0.367354	1.48242	0.00121212	0.12878	1	2090	tags=31%, list=18%, signal=36%
KEGG_NICOTINATE_AND_NICOTINAMIDE_METABOLISM	KEGG_NICOTINATE_AND_NICOTINAMIDE_METABOLISM		19	0.564144	1.48195	0.0789022	0.129178	1	1523	tags=21%, list=13%, signal=24%
HP_ABNORMAL_URINE_CYTOLOGY	HP_ABNORMAL_URINE_CYTOLOGY		103	0.422287	1.48145	0.0147493	0.129621	1	1402	tags=20%, list=12%, signal=23%
GSE2585_THYMIC_DC_VS_THYMIC_MACROPHAGE_DN	GSE2585_THYMIC_DC_VS_THYMIC_MACROPHAGE_DN		141	0.400384	1.48141	0.0201439	0.129583	1	1286	tags=13%, list=11%, signal=15%
GOBP_POSITIVE_REGULATION_OF_TRANSMEMBRANE_RECEPTOR_PROTEIN_SERINE_THREONINE_KINASE_SIGNALING_PATHWAY	GOBP_POSITIVE_REGULATION_OF_TRANSMEMBRANE_RECEPTOR_PROTEIN_SERINE_THREONINE_KINASE_SIGNALING_PATHWAY		72	0.435983	1.48131	0.0309119	0.129608	1	1778	tags=35%, list=15%, signal=41%
GSE9037_WT_VS_IRAK4_KO_LPS_1H_STIM_BMDM_UP	GSE9037_WT_VS_IRAK4_KO_LPS_1H_STIM_BMDM_UP		164	0.397779	1.48117	0.00848656	0.129653	1	2577	tags=29%, list=22%, signal=36%
GSE5503_LIVER_DC_VS_SPLEEN_DC_ACTIVATED_ALLOGENIC_TCELL_UP	GSE5503_LIVER_DC_VS_SPLEEN_DC_ACTIVATED_ALLOGENIC_TCELL_UP		146	0.396375	1.48035	0.0111421	0.130394	1	1269	tags=22%, list=11%, signal=24%
GSE36476_YOUNG_VS_OLD_DONOR_MEMORY_CD4_TCELL_72H_TSST_ACT_UP	GSE36476_YOUNG_VS_OLD_DONOR_MEMORY_CD4_TCELL_72H_TSST_ACT_UP		112	0.413311	1.48011	0.0223547	0.130569	1	1145	tags=22%, list=10%, signal=24%
GSE43955_TH0_VS_TGFB_IL6_TH17_ACT_CD4_TCELL_10H_DN	GSE43955_TH0_VS_TGFB_IL6_TH17_ACT_CD4_TCELL_10H_DN		133	0.402206	1.4799	0.00562588	0.130721	1	2171	tags=32%, list=18%, signal=39%
GOBP_EMBRYONIC_CAMERA_TYPE_EYE_DEVELOPMENT	GOBP_EMBRYONIC_CAMERA_TYPE_EYE_DEVELOPMENT		25	0.54679	1.47979	0.0598592	0.130748	1	1917	tags=32%, list=16%, signal=38%
GOBP_POSITIVE_REGULATION_OF_MORPHOGENESIS_OF_AN_EPITHELIUM	GOBP_POSITIVE_REGULATION_OF_MORPHOGENESIS_OF_AN_EPITHELIUM		19	0.57156	1.47962	0.0672727	0.13083	1	685	tags=42%, list=6%, signal=45%
GSE2585_CD80_HIGH_VS_LOW_AIRE_KO_MTEC_UP	GSE2585_CD80_HIGH_VS_LOW_AIRE_KO_MTEC_UP		137	0.40221	1.47939	0.012605	0.130991	1	1749	tags=31%, list=15%, signal=36%
GSE45365_HEALTHY_VS_MCMV_INFECTION_CD11B_DC_IFNAR_KO_UP	GSE45365_HEALTHY_VS_MCMV_INFECTION_CD11B_DC_IFNAR_KO_UP		136	0.402735	1.47902	0.0126939	0.1313	1	2599	tags=35%, list=22%, signal=44%
HP_HYPERLORDOSIS	HP_HYPERLORDOSIS		141	0.4019	1.47893	0.0154494	0.131317	1	2893	tags=38%, list=24%, signal=50%
GSE41867_DAY8_VS_DAY15_LCMV_ARMSTRONG_EFFECTOR_CD8_TCELL_UP	GSE41867_DAY8_VS_DAY15_LCMV_ARMSTRONG_EFFECTOR_CD8_TCELL_UP		76	0.43856	1.47882	0.0428135	0.131345	1	1455	tags=30%, list=12%, signal=34%
GSE29164_CD8_TCELL_VS_CD8_TCELL_AND_IL12_TREATED_MELANOMA_DAY3_DN	GSE29164_CD8_TCELL_VS_CD8_TCELL_AND_IL12_TREATED_MELANOMA_DAY3_DN		170	0.391049	1.47834	0.00843882	0.131754	1	1937	tags=27%, list=16%, signal=32%
GOBP_ACTIVATION_OF_PHOSPHOLIPASE_C_ACTIVITY	GOBP_ACTIVATION_OF_PHOSPHOLIPASE_C_ACTIVITY		20	0.565184	1.47832	0.0652174	0.131688	1	3520	tags=65%, list=30%, signal=92%
GOBP_NEGATIVE_REGULATION_OF_SMOOTH_MUSCLE_CELL_PROLIFERATION	GOBP_NEGATIVE_REGULATION_OF_SMOOTH_MUSCLE_CELL_PROLIFERATION		32	0.509213	1.47791	0.0479452	0.13202	1	1960	tags=38%, list=17%, signal=45%
GSE29617_CTRL_VS_DAY7_TIV_FLU_VACCINE_PBMC_2008_UP	GSE29617_CTRL_VS_DAY7_TIV_FLU_VACCINE_PBMC_2008_UP		145	0.397953	1.47786	0.00977654	0.13198	1	1066	tags=20%, list=9%, signal=22%
KEGG_CELL_ADHESION_MOLECULES_CAMS	KEGG_CELL_ADHESION_MOLECULES_CAMS		80	0.432295	1.47773	0.0194903	0.132029	1	2341	tags=44%, list=20%, signal=54%
GSE16385_ROSIGLITAZONE_IFNG_TNF_VS_IL4_STIM_MACROPHAGE_UP	GSE16385_ROSIGLITAZONE_IFNG_TNF_VS_IL4_STIM_MACROPHAGE_UP		145	0.398267	1.47747	0.0153631	0.132205	1	1100	tags=19%, list=9%, signal=20%
GSE5589_LPS_VS_LPS_AND_IL6_STIM_IL10_KO_MACROPHAGE_45MIN_DN	GSE5589_LPS_VS_LPS_AND_IL6_STIM_IL10_KO_MACROPHAGE_45MIN_DN		165	0.391487	1.47734	0.00961539	0.132259	1	1892	tags=20%, list=16%, signal=23%
GOBP_REGULATION_OF_REPRODUCTIVE_PROCESS	GOBP_REGULATION_OF_REPRODUCTIVE_PROCESS		86	0.426559	1.47723	0.0208955	0.132315	1	1361	tags=30%, list=12%, signal=34%
GOBP_MONOSACCHARIDE_BIOSYNTHETIC_PROCESS	GOBP_MONOSACCHARIDE_BIOSYNTHETIC_PROCESS		66	0.445156	1.47696	0.0382263	0.132506	1	813	tags=11%, list=7%, signal=11%
GSE25123_WT_VS_PPARG_KO_MACROPHAGE_IL4_STIM_DN	GSE25123_WT_VS_PPARG_KO_MACROPHAGE_IL4_STIM_DN		171	0.393044	1.47669	0.012605	0.132712	1	2158	tags=32%, list=18%, signal=38%
GSE28726_NAIVE_CD4_TCELL_VS_NAIVE_NKTCELL_DN	GSE28726_NAIVE_CD4_TCELL_VS_NAIVE_NKTCELL_DN		142	0.402324	1.47641	0.0155807	0.132915	1	2185	tags=32%, list=18%, signal=39%
GOBP_NEGATIVE_REGULATION_OF_TRANSMEMBRANE_TRANSPORT	GOBP_NEGATIVE_REGULATION_OF_TRANSMEMBRANE_TRANSPORT		79	0.436309	1.47589	0.0271903	0.133351	1	1224	tags=22%, list=10%, signal=24%
GOBP_NEGATIVE_CHEMOTAXIS	GOBP_NEGATIVE_CHEMOTAXIS		39	0.493829	1.47554	0.0469799	0.133636	1	1998	tags=46%, list=17%, signal=55%
HP_APLASIA_HYPOPLASIA_OF_THE_DISTAL_PHALANGES_OF_THE_TOES	HP_APLASIA_HYPOPLASIA_OF_THE_DISTAL_PHALANGES_OF_THE_TOES		15	0.602925	1.47539	0.0697674	0.133723	1	1358	tags=27%, list=11%, signal=30%
GSE24142_EARLY_THYMIC_PROGENITOR_VS_DN2_THYMOCYTE_UP	GSE24142_EARLY_THYMIC_PROGENITOR_VS_DN2_THYMOCYTE_UP		167	0.3914	1.47538	0.0151515	0.133647	1	2183	tags=30%, list=18%, signal=36%
HP_OSTEOLYSIS_INVOLVING_BONES_OF_THE_UPPER_LIMBS	HP_OSTEOLYSIS_INVOLVING_BONES_OF_THE_UPPER_LIMBS		18	0.583635	1.47531	0.0582011	0.133623	1	2545	tags=61%, list=22%, signal=78%
GOMF_PROTEIN_KINASE_C_BINDING	GOMF_PROTEIN_KINASE_C_BINDING		39	0.483029	1.47527	0.0434783	0.133586	1	2419	tags=41%, list=20%, signal=51%
GSE2770_UNTREATED_VS_TGFB_AND_IL12_TREATED_ACT_CD4_TCELL_2H_UP	GSE2770_UNTREATED_VS_TGFB_AND_IL12_TREATED_ACT_CD4_TCELL_2H_UP		118	0.406752	1.47508	0.0223214	0.133688	1	1880	tags=31%, list=16%, signal=36%
GOMF_CALMODULIN_BINDING	GOMF_CALMODULIN_BINDING		134	0.402267	1.47493	0.0100575	0.133782	1	2084	tags=31%, list=18%, signal=37%
GSE32423_IL7_VS_IL7_IL4_NAIVE_CD8_TCELL_UP	GSE32423_IL7_VS_IL7_IL4_NAIVE_CD8_TCELL_UP		125	0.406681	1.47443	0.0165517	0.134223	1	2260	tags=38%, list=19%, signal=47%
HP_ABNORMAL_ATRIOVENTRICULAR_VALVE_MORPHOLOGY	HP_ABNORMAL_ATRIOVENTRICULAR_VALVE_MORPHOLOGY		106	0.411071	1.47385	0.0201729	0.134754	1	2311	tags=37%, list=20%, signal=45%
KEGG_AXON_GUIDANCE	KEGG_AXON_GUIDANCE		104	0.417149	1.47364	0.0135135	0.134886	1	1668	tags=32%, list=14%, signal=37%
GOBP_RESPONSE_TO_COPPER_ION	GOBP_RESPONSE_TO_COPPER_ION		25	0.538341	1.47357	0.0514184	0.134876	1	2102	tags=40%, list=18%, signal=49%
GOBP_BICARBONATE_TRANSPORT	GOBP_BICARBONATE_TRANSPORT		21	0.552695	1.47353	0.0752508	0.134827	1	1004	tags=29%, list=8%, signal=31%
GSE17974_IL4_AND_ANTI_IL12_VS_UNTREATED_48H_ACT_CD4_TCELL_UP	GSE17974_IL4_AND_ANTI_IL12_VS_UNTREATED_48H_ACT_CD4_TCELL_UP		137	0.402399	1.47336	0.0117647	0.134903	1	1991	tags=28%, list=17%, signal=33%
GOBP_CELLULAR_RESPONSE_TO_LOW_DENSITY_LIPOPROTEIN_PARTICLE_STIMULUS	GOBP_CELLULAR_RESPONSE_TO_LOW_DENSITY_LIPOPROTEIN_PARTICLE_STIMULUS		16	0.590685	1.47317	0.0576923	0.135018	1	2488	tags=50%, list=21%, signal=63%
GOBP_ENTRY_INTO_HOST	GOBP_ENTRY_INTO_HOST		110	0.409579	1.47297	0.0134933	0.135138	1	2442	tags=31%, list=21%, signal=39%
HP_ALOPECIA	HP_ALOPECIA		138	0.399182	1.4727	0.0112835	0.135344	1	1012	tags=19%, list=9%, signal=20%
HP_THIN_SKIN	HP_THIN_SKIN		67	0.444096	1.47237	0.035061	0.135602	1	1415	tags=28%, list=12%, signal=32%
GSE22935_WT_VS_MYD88_KO_MACROPHAGE_DN	GSE22935_WT_VS_MYD88_KO_MACROPHAGE_DN		142	0.398127	1.47223	0.0137363	0.135658	1	2429	tags=35%, list=21%, signal=43%
GSE29618_LAIV_VS_TIV_FLU_VACCINE_DAY7_PDC_DN	GSE29618_LAIV_VS_TIV_FLU_VACCINE_DAY7_PDC_DN		124	0.40973	1.47197	0.0220913	0.135843	1	2021	tags=29%, list=17%, signal=35%
GOBP_NEGATIVE_REGULATION_OF_TRANSPORTER_ACTIVITY	GOBP_NEGATIVE_REGULATION_OF_TRANSPORTER_ACTIVITY		45	0.469235	1.4716	0.0393701	0.136149	1	1224	tags=24%, list=10%, signal=27%
GOBP_VASCULAR_ASSOCIATED_SMOOTH_MUSCLE_CONTRACTION	GOBP_VASCULAR_ASSOCIATED_SMOOTH_MUSCLE_CONTRACTION		19	0.56103	1.47154	0.0687831	0.136128	1	1695	tags=26%, list=14%, signal=31%
GOMF_ENDODEOXYRIBONUCLEASE_ACTIVITY	GOMF_ENDODEOXYRIBONUCLEASE_ACTIVITY		30	0.509818	1.47151	0.0647249	0.136074	1	1	tags=3%, list=0%, signal=3%
GSE28737_WT_VS_BCL6_HET_FOLLICULAR_BCELL_UP	GSE28737_WT_VS_BCL6_HET_FOLLICULAR_BCELL_UP		141	0.399238	1.47151	0.014966	0.135994	1	1349	tags=16%, list=11%, signal=18%
GSE13485_DAY1_VS_DAY3_YF17D_VACCINE_PBMC_UP	GSE13485_DAY1_VS_DAY3_YF17D_VACCINE_PBMC_UP		56	0.460834	1.47123	0.0375204	0.136206	1	1940	tags=41%, list=16%, signal=49%
GOBP_INTERLEUKIN_1_BETA_PRODUCTION	GOBP_INTERLEUKIN_1_BETA_PRODUCTION		56	0.454473	1.47111	0.0450161	0.136241	1	1646	tags=25%, list=14%, signal=29%
GOBP_MUSCLE_HYPERTROPHY	GOBP_MUSCLE_HYPERTROPHY		63	0.460459	1.47102	0.0323625	0.136259	1	1809	tags=33%, list=15%, signal=39%
GOBP_PITUITARY_GLAND_DEVELOPMENT	GOBP_PITUITARY_GLAND_DEVELOPMENT		17	0.576508	1.47091	0.0632689	0.136293	1	1596	tags=47%, list=14%, signal=54%
GOBP_POSITIVE_REGULATION_OF_FOCAL_ADHESION_ASSEMBLY	GOBP_POSITIVE_REGULATION_OF_FOCAL_ADHESION_ASSEMBLY		21	0.565482	1.47076	0.0550775	0.136357	1	1799	tags=38%, list=15%, signal=45%
GSE6259_BCELL_VS_CD8_TCELL_UP	GSE6259_BCELL_VS_CD8_TCELL_UP		154	0.398445	1.47062	0.00995733	0.136405	1	2077	tags=31%, list=18%, signal=37%
GOBP_POSITIVE_REGULATION_OF_PEPTIDE_HORMONE_SECRETION	GOBP_POSITIVE_REGULATION_OF_PEPTIDE_HORMONE_SECRETION		50	0.470263	1.47058	0.0424144	0.136367	1	991	tags=22%, list=8%, signal=24%
GOCC_APICAL_PLASMA_MEMBRANE	GOCC_APICAL_PLASMA_MEMBRANE		201	0.38437	1.47041	0.00547945	0.136477	1	1997	tags=31%, list=17%, signal=36%
HOEK_MYELOID_DENDRITIC_CELL_2011_2012_TIV_ADULT_1DY_UP	HOEK_MYELOID_DENDRITIC_CELL_2011_2012_TIV_ADULT_1DY_UP		18	0.572958	1.46978	0.0817717	0.137059	1	1316	tags=50%, list=11%, signal=56%
GSE28726_NAIVE_VS_ACTIVATED_VA24NEG_NKTCELL_DN	GSE28726_NAIVE_VS_ACTIVATED_VA24NEG_NKTCELL_DN		126	0.401336	1.46957	0.0201149	0.1372	1	2273	tags=29%, list=19%, signal=35%
GSE360_L_MAJOR_VS_B_MALAYI_LOW_DOSE_DC_UP	GSE360_L_MAJOR_VS_B_MALAYI_LOW_DOSE_DC_UP		151	0.395077	1.46909	0.0180055	0.13761	1	951	tags=15%, list=8%, signal=16%
GSE22611_UNSTIM_VS_2H_MDP_STIM_NOD2_TRANSDUCED_HEK293T_CELL_DN	GSE22611_UNSTIM_VS_2H_MDP_STIM_NOD2_TRANSDUCED_HEK293T_CELL_DN		134	0.398999	1.46908	0.0217077	0.137531	1	1418	tags=19%, list=12%, signal=22%
GSE25677_R848_VS_MPL_AND_R848_STIM_BCELL_UP	GSE25677_R848_VS_MPL_AND_R848_STIM_BCELL_UP		91	0.422024	1.46894	0.0165663	0.137606	1	1940	tags=26%, list=16%, signal=31%
GSE22886_NAIVE_CD8_TCELL_VS_NEUTROPHIL_DN	GSE22886_NAIVE_CD8_TCELL_VS_NEUTROPHIL_DN		128	0.402859	1.4685	0.0255682	0.137999	1	1435	tags=31%, list=12%, signal=35%
HP_ABNORMALITY_OF_LOWER_LIMB_JOINT	HP_ABNORMALITY_OF_LOWER_LIMB_JOINT		473	0.351509	1.46846	0.0011976	0.137963	1	1884	tags=24%, list=16%, signal=27%
GSE3982_DC_VS_NKCELL_UP	GSE3982_DC_VS_NKCELL_UP		161	0.391341	1.46842	0.00839161	0.13792	1	2402	tags=33%, list=20%, signal=41%
HP_ADRENAL_HYPOPLASIA	HP_ADRENAL_HYPOPLASIA		19	0.566894	1.46829	0.0679612	0.137965	1	1349	tags=37%, list=11%, signal=42%
GOBP_ZYMOGEN_ACTIVATION	GOBP_ZYMOGEN_ACTIVATION		34	0.497621	1.46814	0.0547264	0.138021	1	527	tags=18%, list=4%, signal=18%
RAF_UP.V1_UP	RAF_UP.V1_UP		163	0.393157	1.46813	0.00828729	0.137946	1	2264	tags=34%, list=19%, signal=41%
GOCC_VOLTAGE_GATED_CALCIUM_CHANNEL_COMPLEX	GOCC_VOLTAGE_GATED_CALCIUM_CHANNEL_COMPLEX		18	0.581312	1.46805	0.0521739	0.13794	1	845	tags=28%, list=7%, signal=30%
GSE11961_FOLLICULAR_BCELL_VS_GERMINAL_CENTER_BCELL_DAY7_DN	GSE11961_FOLLICULAR_BCELL_VS_GERMINAL_CENTER_BCELL_DAY7_DN		143	0.397192	1.4673	0.0203488	0.138616	1	2500	tags=34%, list=21%, signal=43%
GSE30971_CTRL_VS_LPS_STIM_MACROPHAGE_WBP7_KO_4H_UP	GSE30971_CTRL_VS_LPS_STIM_MACROPHAGE_WBP7_KO_4H_UP		150	0.394402	1.46718	0.0138313	0.138649	1	2570	tags=33%, list=22%, signal=41%
HP_PLATYBASIA	HP_PLATYBASIA		15	0.603456	1.46696	0.0822669	0.138812	1	3042	tags=67%, list=26%, signal=90%
GOBP_NEGATIVE_REGULATION_OF_REACTIVE_OXYGEN_SPECIES_BIOSYNTHETIC_PROCESS	GOBP_NEGATIVE_REGULATION_OF_REACTIVE_OXYGEN_SPECIES_BIOSYNTHETIC_PROCESS		19	0.554916	1.4669	0.0833333	0.138794	1	2825	tags=47%, list=24%, signal=62%
GOBP_EMBRYONIC_DIGIT_MORPHOGENESIS	GOBP_EMBRYONIC_DIGIT_MORPHOGENESIS		39	0.490587	1.46674	0.0504886	0.138891	1	1596	tags=31%, list=14%, signal=35%
GSE6269_HEALTHY_VS_E_COLI_INF_PBMC_DN	GSE6269_HEALTHY_VS_E_COLI_INF_PBMC_DN		100	0.42256	1.46671	0.0234261	0.138833	1	1616	tags=30%, list=14%, signal=34%
HP_RETINAL_DETACHMENT	HP_RETINAL_DETACHMENT		66	0.439495	1.46668	0.0401284	0.138784	1	2785	tags=42%, list=24%, signal=55%
HP_APLASIA_HYPOPLASIA_OF_THE_HALLUX	HP_APLASIA_HYPOPLASIA_OF_THE_HALLUX		40	0.488133	1.46661	0.064	0.13877	1	1756	tags=30%, list=15%, signal=35%
GOBP_POSITIVE_REGULATION_OF_STRESS_FIBER_ASSEMBLY	GOBP_POSITIVE_REGULATION_OF_STRESS_FIBER_ASSEMBLY		41	0.484818	1.46625	0.0426229	0.139063	1	2711	tags=39%, list=23%, signal=50%
GSE22886_IGG_IGA_MEMORY_BCELL_VS_BM_PLASMA_CELL_DN	GSE22886_IGG_IGA_MEMORY_BCELL_VS_BM_PLASMA_CELL_DN		135	0.396852	1.46607	0.0147493	0.139167	1	3142	tags=38%, list=27%, signal=51%
HP_TEMPERATURE_INSTABILITY	HP_TEMPERATURE_INSTABILITY		21	0.55469	1.46589	0.0659722	0.139282	1	1902	tags=48%, list=16%, signal=57%
GSE27241_CTRL_VS_DIGOXIN_TREATED_CD4_TCELL_IN_TH17_POLARIZING_CONDITIONS_DN	GSE27241_CTRL_VS_DIGOXIN_TREATED_CD4_TCELL_IN_TH17_POLARIZING_CONDITIONS_DN		159	0.390133	1.46581	0.0125	0.139284	1	1771	tags=24%, list=15%, signal=28%
GOBP_NEGATIVE_REGULATION_OF_LIPID_STORAGE	GOBP_NEGATIVE_REGULATION_OF_LIPID_STORAGE		18	0.567306	1.46563	0.0731293	0.139391	1	3208	tags=72%, list=27%, signal=99%
RAPA_EARLY_UP.V1_UP	RAPA_EARLY_UP.V1_UP		101	0.411673	1.4656	0.0145138	0.139342	1	1185	tags=25%, list=10%, signal=27%
HP_ARTHRITIS	HP_ARTHRITIS		145	0.394766	1.46556	0.0128023	0.139304	1	1977	tags=24%, list=17%, signal=29%
GOBP_APICAL_JUNCTION_ASSEMBLY	GOBP_APICAL_JUNCTION_ASSEMBLY		51	0.461307	1.4651	0.0429448	0.139701	1	2337	tags=39%, list=20%, signal=49%
GOBP_NEGATIVE_REGULATION_OF_CELL_ADHESION	GOBP_NEGATIVE_REGULATION_OF_CELL_ADHESION		213	0.380502	1.46507	0.00394218	0.139646	1	1826	tags=29%, list=15%, signal=34%
GOBP_HEMATOPOIETIC_STEM_CELL_PROLIFERATION	GOBP_HEMATOPOIETIC_STEM_CELL_PROLIFERATION		19	0.553218	1.46497	0.0736301	0.139662	1	2825	tags=37%, list=24%, signal=48%
GSE13306_TREG_RA_VS_TCONV_RA_DN	GSE13306_TREG_RA_VS_TCONV_RA_DN		124	0.402479	1.46478	0.0265096	0.139781	1	2182	tags=31%, list=18%, signal=37%
GSE2405_0H_VS_24H_A_PHAGOCYTOPHILUM_STIM_NEUTROPHIL_DN	GSE2405_0H_VS_24H_A_PHAGOCYTOPHILUM_STIM_NEUTROPHIL_DN		170	0.388275	1.46472	0.00957592	0.139755	1	1827	tags=24%, list=15%, signal=28%
GSE21360_NAIVE_VS_PRIMARY_MEMORY_CD8_TCELL_UP	GSE21360_NAIVE_VS_PRIMARY_MEMORY_CD8_TCELL_UP		145	0.402503	1.46452	0.0233516	0.13988	1	2163	tags=28%, list=18%, signal=34%
GSE16450_CTRL_VS_IFNA_12H_STIM_IMMATURE_NEURON_CELL_LINE_DN	GSE16450_CTRL_VS_IFNA_12H_STIM_IMMATURE_NEURON_CELL_LINE_DN		121	0.405084	1.46439	0.034384	0.139949	1	2066	tags=27%, list=17%, signal=33%
HP_WIDE_CRANIAL_SUTURES	HP_WIDE_CRANIAL_SUTURES		22	0.538563	1.46429	0.0767947	0.139967	1	1704	tags=32%, list=14%, signal=37%
GSE20715_0H_VS_6H_OZONE_TLR4_KO_LUNG_UP	GSE20715_0H_VS_6H_OZONE_TLR4_KO_LUNG_UP		135	0.396898	1.46425	0.0203785	0.13992	1	2142	tags=24%, list=18%, signal=29%
GOBP_MAMMARY_GLAND_DUCT_MORPHOGENESIS	GOBP_MAMMARY_GLAND_DUCT_MORPHOGENESIS		21	0.547397	1.46414	0.0765217	0.139959	1	1819	tags=43%, list=15%, signal=51%
GOBP_NEPHRON_EPITHELIUM_DEVELOPMENT	GOBP_NEPHRON_EPITHELIUM_DEVELOPMENT		64	0.441925	1.46401	0.0480769	0.140034	1	1687	tags=44%, list=14%, signal=51%
HP_ABNORMAL_BLEEDING	HP_ABNORMAL_BLEEDING		358	0.359076	1.46381	0	0.140165	1	2006	tags=25%, list=17%, signal=29%
HP_INCREASED_BONE_MINERAL_DENSITY	HP_INCREASED_BONE_MINERAL_DENSITY		75	0.441259	1.4638	0.0361991	0.140092	1	1689	tags=25%, list=14%, signal=29%
GSE29614_CTRL_VS_TIV_FLU_VACCINE_PBMC_2007_UP	GSE29614_CTRL_VS_TIV_FLU_VACCINE_PBMC_2007_UP		66	0.449719	1.46373	0.0385852	0.140094	1	1685	tags=32%, list=14%, signal=37%
HP_POSTURAL_TREMOR	HP_POSTURAL_TREMOR		39	0.476411	1.46362	0.0548173	0.140136	1	361	tags=8%, list=3%, signal=8%
LI_PBMC_MENOMUNE_A_C_Y_W_135_AGE_18_45YO_CORRELATED_WITH_ANTIBODY_RESPONSE_3DY_NEGATIVE	LI_PBMC_MENOMUNE_A_C_Y_W_135_AGE_18_45YO_CORRELATED_WITH_ANTIBODY_RESPONSE_3DY_NEGATIVE		20	0.559859	1.46325	0.0665584	0.140453	1	1782	tags=30%, list=15%, signal=35%
GSE9988_LPS_VS_CTRL_TREATED_MONOCYTE_UP	GSE9988_LPS_VS_CTRL_TREATED_MONOCYTE_UP		141	0.394064	1.46289	0.013624	0.140767	1	1929	tags=26%, list=16%, signal=30%
HP_VASCULAR_CALCIFICATION	HP_VASCULAR_CALCIFICATION		20	0.557068	1.46282	0.0792079	0.140769	1	1811	tags=40%, list=15%, signal=47%
GSE37301_PRO_BCELL_VS_CD4_TCELL_DN	GSE37301_PRO_BCELL_VS_CD4_TCELL_DN		118	0.404128	1.46276	0.0201439	0.14074	1	2386	tags=36%, list=20%, signal=45%
GSE3982_DC_VS_BASOPHIL_UP	GSE3982_DC_VS_BASOPHIL_UP		158	0.391656	1.46271	0.015493	0.140706	1	2295	tags=26%, list=19%, signal=32%
HP_ABNORMAL_ARTERIAL_PHYSIOLOGY	HP_ABNORMAL_ARTERIAL_PHYSIOLOGY		97	0.418436	1.4625	0.0213675	0.140858	1	1867	tags=28%, list=16%, signal=33%
HP_PROPORTIONATE_SHORT_STATURE	HP_PROPORTIONATE_SHORT_STATURE		100	0.416914	1.46243	0.0226629	0.140841	1	1612	tags=21%, list=14%, signal=24%
GOBP_HETEROPHILIC_CELL_CELL_ADHESION_VIA_PLASMA_MEMBRANE_CELL_ADHESION_MOLECULES	GOBP_HETEROPHILIC_CELL_CELL_ADHESION_VIA_PLASMA_MEMBRANE_CELL_ADHESION_MOLECULES		29	0.506347	1.46235	0.06914	0.140849	1	1675	tags=41%, list=14%, signal=48%
HP_RECURRENT_FRACTURES	HP_RECURRENT_FRACTURES		97	0.413333	1.4622	0.0274809	0.140936	1	2913	tags=39%, list=25%, signal=52%
HP_MICRODONTIA	HP_MICRODONTIA		88	0.417555	1.46204	0.0247813	0.141014	1	1917	tags=30%, list=16%, signal=35%
GOBP_POSITIVE_REGULATION_OF_MAP_KINASE_ACTIVITY	GOBP_POSITIVE_REGULATION_OF_MAP_KINASE_ACTIVITY		180	0.381816	1.4618	0.00966851	0.141181	1	2017	tags=28%, list=17%, signal=34%
GOBP_POSITIVE_REGULATION_OF_DNA_BINDING	GOBP_POSITIVE_REGULATION_OF_DNA_BINDING		38	0.487076	1.4618	0.0543657	0.141101	1	299	tags=13%, list=3%, signal=13%
GSE17721_CTRL_VS_LPS_0.5H_BMDC_DN	GSE17721_CTRL_VS_LPS_0.5H_BMDC_DN		146	0.39583	1.46175	0.0165289	0.141068	1	2701	tags=37%, list=23%, signal=47%
GOBP_VENTRICULAR_CARDIAC_MUSCLE_TISSUE_DEVELOPMENT	GOBP_VENTRICULAR_CARDIAC_MUSCLE_TISSUE_DEVELOPMENT		32	0.505147	1.46159	0.0616883	0.141168	1	1778	tags=41%, list=15%, signal=48%
GOBP_ANIMAL_ORGAN_FORMATION	GOBP_ANIMAL_ORGAN_FORMATION		38	0.486406	1.46145	0.0619902	0.141257	1	1651	tags=39%, list=14%, signal=46%
GOBP_LIVER_REGENERATION	GOBP_LIVER_REGENERATION		25	0.545711	1.46107	0.0547009	0.141618	1	1933	tags=36%, list=16%, signal=43%
HP_PROTUBERANT_ABDOMEN	HP_PROTUBERANT_ABDOMEN		20	0.55106	1.46102	0.0848056	0.141578	1	1336	tags=25%, list=11%, signal=28%
GSE3982_DC_VS_MAC_LPS_STIM_DN	GSE3982_DC_VS_MAC_LPS_STIM_DN		149	0.39152	1.46082	0.0102339	0.141723	1	1777	tags=21%, list=15%, signal=24%
GOBP_NEGATIVE_REGULATION_OF_DEVELOPMENTAL_GROWTH	GOBP_NEGATIVE_REGULATION_OF_DEVELOPMENTAL_GROWTH		78	0.430224	1.4607	0.0225225	0.141767	1	1530	tags=23%, list=13%, signal=26%
GSE7509_DC_VS_MONOCYTE_UP	GSE7509_DC_VS_MONOCYTE_UP		163	0.389415	1.4605	0.0110041	0.141901	1	1718	tags=20%, list=15%, signal=23%
GSE37532_VISCERAL_ADIPOSE_TISSUE_VS_LN_DERIVED_TCONV_CD4_TCELL_DN	GSE37532_VISCERAL_ADIPOSE_TISSUE_VS_LN_DERIVED_TCONV_CD4_TCELL_DN		42	0.484467	1.45976	0.0490506	0.142609	1	1828	tags=38%, list=15%, signal=45%
HP_SKELETAL_DYSPLASIA	HP_SKELETAL_DYSPLASIA		130	0.402711	1.45971	0.015625	0.142579	1	2917	tags=38%, list=25%, signal=51%
JNK_DN.V1_DN	JNK_DN.V1_DN		113	0.409073	1.45944	0.0115774	0.142796	1	2252	tags=38%, list=19%, signal=47%
GOBP_POSITIVE_REGULATION_OF_ORGAN_GROWTH	GOBP_POSITIVE_REGULATION_OF_ORGAN_GROWTH		32	0.500978	1.45943	0.0645695	0.142721	1	1687	tags=41%, list=14%, signal=47%
HP_ABNORMAL_FINGERNAIL_MORPHOLOGY	HP_ABNORMAL_FINGERNAIL_MORPHOLOGY		127	0.397649	1.45901	0.0241821	0.1431	1	1675	tags=25%, list=14%, signal=29%
HP_DIFFICULTY_RUNNING	HP_DIFFICULTY_RUNNING		26	0.523757	1.45898	0.0864407	0.14305	1	2966	tags=42%, list=25%, signal=56%
HP_MYELOMENINGOCELE	HP_MYELOMENINGOCELE		15	0.593814	1.45895	0.087344	0.142986	1	1320	tags=33%, list=11%, signal=37%
AKT_UP_MTOR_DN.V1_UP	AKT_UP_MTOR_DN.V1_UP		125	0.395394	1.4585	0.0184922	0.143398	1	2356	tags=36%, list=20%, signal=44%
GSE27786_NKTCELL_VS_ERYTHROBLAST_DN	GSE27786_NKTCELL_VS_ERYTHROBLAST_DN		124	0.403344	1.4584	0.0255682	0.143417	1	1458	tags=23%, list=12%, signal=25%
GSE2706_R848_VS_R848_AND_LPS_8H_STIM_DC_DN	GSE2706_R848_VS_R848_AND_LPS_8H_STIM_DC_DN		133	0.399321	1.45801	0.0203488	0.143741	1	2095	tags=26%, list=18%, signal=32%
GSE30083_SP2_VS_SP3_THYMOCYTE_UP	GSE30083_SP2_VS_SP3_THYMOCYTE_UP		141	0.393661	1.45778	0.015896	0.143893	1	1612	tags=29%, list=14%, signal=33%
GSE43955_10H_VS_60H_ACT_CD4_TCELL_DN	GSE43955_10H_VS_60H_ACT_CD4_TCELL_DN		156	0.389115	1.45753	0.0110345	0.144088	1	1592	tags=22%, list=13%, signal=26%
GOBP_TUMOR_NECROSIS_FACTOR_SUPERFAMILY_CYTOKINE_PRODUCTION	GOBP_TUMOR_NECROSIS_FACTOR_SUPERFAMILY_CYTOKINE_PRODUCTION		103	0.408978	1.45712	0.0156695	0.144442	1	1821	tags=23%, list=15%, signal=27%
GSE2770_UNTREATED_VS_IL12_TREATED_ACT_CD4_TCELL_6H_DN	GSE2770_UNTREATED_VS_IL12_TREATED_ACT_CD4_TCELL_6H_DN		152	0.392849	1.45704	0.0183099	0.144443	1	2903	tags=30%, list=25%, signal=40%
GOBP_REGULATION_OF_POSITIVE_CHEMOTAXIS	GOBP_REGULATION_OF_POSITIVE_CHEMOTAXIS		20	0.558512	1.45695	0.0709459	0.144455	1	1816	tags=40%, list=15%, signal=47%
GOBP_POSITIVE_REGULATION_OF_CELL_SUBSTRATE_JUNCTION_ORGANIZATION	GOBP_POSITIVE_REGULATION_OF_CELL_SUBSTRATE_JUNCTION_ORGANIZATION		26	0.533549	1.45691	0.0525394	0.144422	1	1799	tags=35%, list=15%, signal=41%
GSE11884_WT_VS_FURIN_KO_NAIVE_CD4_TCELL_UP	GSE11884_WT_VS_FURIN_KO_NAIVE_CD4_TCELL_UP		87	0.425812	1.45632	0.0297806	0.144983	1	2187	tags=34%, list=19%, signal=42%
GOBP_REGULATION_OF_RECEPTOR_BINDING	GOBP_REGULATION_OF_RECEPTOR_BINDING		17	0.589138	1.45632	0.0798548	0.1449	1	1246	tags=35%, list=11%, signal=39%
GOBP_NEGATIVE_REGULATION_OF_PROTEIN_MATURATION	GOBP_NEGATIVE_REGULATION_OF_PROTEIN_MATURATION		17	0.593831	1.45586	0.0819964	0.145319	1	622	tags=35%, list=5%, signal=37%
OVSYANNIKOVA_PBMC_FLUARIX_AGE_55_64YO_RESPONDERS_VS_NONRESPONDERS_0DY_UP	OVSYANNIKOVA_PBMC_FLUARIX_AGE_55_64YO_RESPONDERS_VS_NONRESPONDERS_0DY_UP		23	0.5382	1.45579	0.0511945	0.14531	1	2364	tags=43%, list=20%, signal=54%
GSE14769_UNSTIM_VS_80MIN_LPS_BMDM_DN	GSE14769_UNSTIM_VS_80MIN_LPS_BMDM_DN		169	0.381412	1.45561	0.014885	0.145445	1	1499	tags=24%, list=13%, signal=27%
HP_ABNORMALITY_OF_THE_DISTAL_PHALANGES_OF_THE_TOES	HP_ABNORMALITY_OF_THE_DISTAL_PHALANGES_OF_THE_TOES		19	0.565734	1.4556	0.0730838	0.145374	1	1358	tags=26%, list=11%, signal=30%
MATSUMIYA_PBMC_MODIFIED_VACCINIA_ANKARA_VACCINE_AGE_18_55YO_2DY_UP	MATSUMIYA_PBMC_MODIFIED_VACCINIA_ANKARA_VACCINE_AGE_18_55YO_2DY_UP		39	0.492893	1.45543	0.0412541	0.145474	1	1997	tags=33%, list=17%, signal=40%
GSE21063_CTRL_VS_ANTI_IGM_STIM_BCELL_NFATC1_KO_16H_UP	GSE21063_CTRL_VS_ANTI_IGM_STIM_BCELL_NFATC1_KO_16H_UP		146	0.392287	1.45522	0.0163488	0.145639	1	1250	tags=19%, list=11%, signal=21%
PKCA_DN.V1_UP	PKCA_DN.V1_UP		83	0.428444	1.45477	0.0428571	0.146068	1	1080	tags=19%, list=9%, signal=21%
HP_LIMB_GIRDLE_MUSCLE_WEAKNESS	HP_LIMB_GIRDLE_MUSCLE_WEAKNESS		58	0.449608	1.45438	0.0453074	0.146392	1	2966	tags=38%, list=25%, signal=50%
GSE21927_SPLEEN_VS_C26GM_TUMOR_MONOCYTE_BALBC_UP	GSE21927_SPLEEN_VS_C26GM_TUMOR_MONOCYTE_BALBC_UP		88	0.426799	1.45422	0.0160819	0.146484	1	2267	tags=33%, list=19%, signal=40%
HP_GENU_VALGUM	HP_GENU_VALGUM		101	0.413743	1.45416	0.0264706	0.146456	1	1884	tags=25%, list=16%, signal=29%
HP_ABNORMALITY_OF_THE_DENTAL_PULP	HP_ABNORMALITY_OF_THE_DENTAL_PULP		33	0.501359	1.45415	0.0554649	0.146381	1	2259	tags=30%, list=19%, signal=37%
GOBP_REGULATION_OF_CELL_MORPHOGENESIS	GOBP_REGULATION_OF_CELL_MORPHOGENESIS		247	0.369969	1.45405	0.00524246	0.146404	1	2094	tags=29%, list=18%, signal=34%
GSE360_L_MAJOR_VS_B_MALAYI_HIGH_DOSE_MAC_UP	GSE360_L_MAJOR_VS_B_MALAYI_HIGH_DOSE_MAC_UP		135	0.39704	1.45397	0.0165517	0.146395	1	1531	tags=24%, list=13%, signal=27%
GSE19198_1H_VS_24H_IL21_TREATED_TCELL_DN	GSE19198_1H_VS_24H_IL21_TREATED_TCELL_DN		161	0.388246	1.45387	0.0172414	0.146416	1	1770	tags=22%, list=15%, signal=26%
GOBP_ACTIN_MEDIATED_CELL_CONTRACTION	GOBP_ACTIN_MEDIATED_CELL_CONTRACTION		69	0.425468	1.45379	0.0230769	0.146408	1	1727	tags=33%, list=15%, signal=39%
GSE37605_TREG_VS_TCONV_C57BL6_FOXP3_IRES_GFP_UP	GSE37605_TREG_VS_TCONV_C57BL6_FOXP3_IRES_GFP_UP		49	0.469494	1.45342	0.0284281	0.146746	1	1566	tags=27%, list=13%, signal=30%
GOBP_POSITIVE_REGULATION_OF_ION_TRANSPORT	GOBP_POSITIVE_REGULATION_OF_ION_TRANSPORT		444	0.350186	1.45341	0.00122399	0.146666	1	1749	tags=22%, list=15%, signal=25%
HP_ABNORMALITY_OF_CARPAL_BONE_OSSIFICATION	HP_ABNORMALITY_OF_CARPAL_BONE_OSSIFICATION		25	0.520231	1.45337	0.0582011	0.146628	1	2893	tags=52%, list=24%, signal=69%
GSE35543_IN_VITRO_ITREG_VS_CONVERTED_EX_ITREG_DN	GSE35543_IN_VITRO_ITREG_VS_CONVERTED_EX_ITREG_DN		131	0.397165	1.45334	0.0221239	0.146574	1	2547	tags=33%, list=22%, signal=41%
GSE9601_UNTREATED_VS_NFKB_INHIBITOR_TREATED_HCMV_INF_MONOCYTE_UP	GSE9601_UNTREATED_VS_NFKB_INHIBITOR_TREATED_HCMV_INF_MONOCYTE_UP		106	0.410905	1.45315	0.021309	0.146679	1	1964	tags=31%, list=17%, signal=37%
GSE16385_UNTREATED_VS_12H_IFNG_TNF_TREATED_MACROPHAGE_UP	GSE16385_UNTREATED_VS_12H_IFNG_TNF_TREATED_MACROPHAGE_UP		97	0.417676	1.45302	0.0235294	0.146746	1	2504	tags=40%, list=21%, signal=51%
GOBP_REGULATION_OF_NEUTROPHIL_CHEMOTAXIS	GOBP_REGULATION_OF_NEUTROPHIL_CHEMOTAXIS		29	0.508717	1.45295	0.0664395	0.14673	1	1614	tags=28%, list=14%, signal=32%
HP_ABNORMALITY_OF_THE_MUSCULATURE_OF_THE_UPPER_LIMBS	HP_ABNORMALITY_OF_THE_MUSCULATURE_OF_THE_UPPER_LIMBS		146	0.38965	1.45272	0.0111888	0.146902	1	1822	tags=23%, list=15%, signal=26%
GOBP_CELLULAR_RESPONSE_TO_VITAMIN_D	GOBP_CELLULAR_RESPONSE_TO_VITAMIN_D		16	0.598693	1.45236	0.0893471	0.147254	1	1416	tags=38%, list=12%, signal=43%
YAP1_DN	YAP1_DN		24	0.534797	1.45232	0.0680628	0.147212	1	1286	tags=17%, list=11%, signal=19%
HP_SLENDER_FINGER	HP_SLENDER_FINGER		104	0.409683	1.45228	0.0303468	0.147174	1	1040	tags=21%, list=9%, signal=23%
HP_CEREBRAL_CALCIFICATION	HP_CEREBRAL_CALCIFICATION		93	0.418116	1.45223	0.0284858	0.147145	1	1047	tags=16%, list=9%, signal=18%
GOBP_RESPONSE_TO_DRUG	GOBP_RESPONSE_TO_DRUG		237	0.367182	1.45175	0.00927152	0.147632	1	1842	tags=23%, list=16%, signal=26%
GSE20715_WT_VS_TLR4_KO_24H_OZONE_LUNG_DN	GSE20715_WT_VS_TLR4_KO_24H_OZONE_LUNG_DN		166	0.385233	1.4516	0.00853485	0.147722	1	1615	tags=21%, list=14%, signal=24%
GSE15215_CD2_POS_VS_NEG_PDC_UP	GSE15215_CD2_POS_VS_NEG_PDC_UP		133	0.393516	1.45159	0.0226308	0.14764	1	2487	tags=40%, list=21%, signal=50%
GSE16385_ROSIGLITAZONE_IL4_VS_IFNG_TNF_STIM_MACROPHAGE_DN	GSE16385_ROSIGLITAZONE_IL4_VS_IFNG_TNF_STIM_MACROPHAGE_DN		121	0.403929	1.45141	0.0306569	0.14777	1	1734	tags=31%, list=15%, signal=35%
GSE8835_CD4_VS_CD8_TCELL_CLL_PATIENT_DN	GSE8835_CD4_VS_CD8_TCELL_CLL_PATIENT_DN		170	0.384296	1.45134	0.0175439	0.147767	1	2305	tags=31%, list=20%, signal=38%
GSE36078_UNTREATED_VS_AD5_INF_MOUSE_LUNG_DC_UP	GSE36078_UNTREATED_VS_AD5_INF_MOUSE_LUNG_DC_UP		102	0.408574	1.45134	0.03125	0.147685	1	2277	tags=43%, list=19%, signal=53%
GSE10325_MYELOID_VS_LUPUS_MYELOID_UP	GSE10325_MYELOID_VS_LUPUS_MYELOID_UP		112	0.405656	1.45117	0.017673	0.147771	1	1672	tags=34%, list=14%, signal=39%
GSE23568_CTRL_TRANSDUCED_VS_WT_CD8_TCELL_DN	GSE23568_CTRL_TRANSDUCED_VS_WT_CD8_TCELL_DN		167	0.386564	1.45087	0.0120805	0.148022	1	2132	tags=25%, list=18%, signal=30%
HP_DENTAL_CROWDING	HP_DENTAL_CROWDING		74	0.427641	1.45073	0.0298954	0.148112	1	1047	tags=19%, list=9%, signal=21%
HP_EPIPHYSEAL_DYSPLASIA	HP_EPIPHYSEAL_DYSPLASIA		18	0.568431	1.45062	0.0725664	0.148148	1	2679	tags=56%, list=23%, signal=72%
HP_ABNORMALITY_OF_THE_KNEE	HP_ABNORMALITY_OF_THE_KNEE		253	0.370568	1.45048	0.00539084	0.14823	1	1884	tags=26%, list=16%, signal=30%
GOMF_LIPOPROTEIN_PARTICLE_RECEPTOR_BINDING	GOMF_LIPOPROTEIN_PARTICLE_RECEPTOR_BINDING		19	0.556709	1.45028	0.0820244	0.148364	1	2515	tags=42%, list=21%, signal=53%
HP_ABNORMALITY_OF_THE_CHIN	HP_ABNORMALITY_OF_THE_CHIN		238	0.371263	1.45009	0.00674764	0.148491	1	1358	tags=18%, list=11%, signal=20%
GSE9988_LOW_LPS_VS_ANTI_TREM1_AND_LPS_MONOCYTE_DN	GSE9988_LOW_LPS_VS_ANTI_TREM1_AND_LPS_MONOCYTE_DN		148	0.387073	1.45005	0.0184136	0.148454	1	1805	tags=24%, list=15%, signal=28%
KEGG_MELANOGENESIS	KEGG_MELANOGENESIS		70	0.434522	1.44969	0.0451713	0.148773	1	1357	tags=23%, list=11%, signal=26%
HP_WEAKNESS_OF_MUSCLES_OF_RESPIRATION	HP_WEAKNESS_OF_MUSCLES_OF_RESPIRATION		65	0.43272	1.44948	0.0473934	0.148924	1	1253	tags=23%, list=11%, signal=26%
GOBP_DIGESTIVE_TRACT_MORPHOGENESIS	GOBP_DIGESTIVE_TRACT_MORPHOGENESIS		31	0.507429	1.44923	0.0509868	0.149108	1	1064	tags=35%, list=9%, signal=39%
GSE11961_FOLLICULAR_BCELL_VS_PLASMA_CELL_DAY7_UP	GSE11961_FOLLICULAR_BCELL_VS_PLASMA_CELL_DAY7_UP		141	0.390931	1.44897	0.0169972	0.149302	1	2425	tags=28%, list=21%, signal=34%
GOBP_FC_EPSILON_RECEPTOR_SIGNALING_PATHWAY	GOBP_FC_EPSILON_RECEPTOR_SIGNALING_PATHWAY		102	0.406172	1.44869	0.0337739	0.14955	1	133	tags=5%, list=1%, signal=5%
KRAS.300_UP.V1_DN	KRAS.300_UP.V1_DN		70	0.435875	1.44847	0.0368189	0.149709	1	1224	tags=26%, list=10%, signal=29%
GSE5589_WT_VS_IL10_KO_LPS_AND_IL6_STIM_MACROPHAGE_45MIN_UP	GSE5589_WT_VS_IL10_KO_LPS_AND_IL6_STIM_MACROPHAGE_45MIN_UP		123	0.398651	1.44834	0.0205882	0.149776	1	1527	tags=23%, list=13%, signal=26%
GOBP_NEGATIVE_REGULATION_OF_LIPID_LOCALIZATION	GOBP_NEGATIVE_REGULATION_OF_LIPID_LOCALIZATION		31	0.509057	1.44829	0.0599002	0.149749	1	2809	tags=45%, list=24%, signal=59%
GOBP_REGULATION_OF_LYASE_ACTIVITY	GOBP_REGULATION_OF_LYASE_ACTIVITY		23	0.537321	1.44828	0.0734095	0.149671	1	1234	tags=35%, list=10%, signal=39%
GOBP_LEUKOCYTE_CELL_CELL_ADHESION	GOBP_LEUKOCYTE_CELL_CELL_ADHESION		279	0.36084	1.44825	0.00651042	0.149619	1	1749	tags=24%, list=15%, signal=28%
GSE19923_WT_VS_E2A_KO_DP_THYMOCYTE_UP	GSE19923_WT_VS_E2A_KO_DP_THYMOCYTE_UP		134	0.396297	1.44824	0.0203193	0.149547	1	1644	tags=20%, list=14%, signal=23%
GSE29618_PRE_VS_DAY7_POST_TIV_FLU_VACCINE_BCELL_UP	GSE29618_PRE_VS_DAY7_POST_TIV_FLU_VACCINE_BCELL_UP		101	0.411679	1.44809	0.0206795	0.149637	1	1846	tags=33%, list=16%, signal=38%
GSE3982_BCELL_VS_TH1_DN	GSE3982_BCELL_VS_TH1_DN		153	0.387871	1.44785	0.00987306	0.149834	1	2156	tags=27%, list=18%, signal=33%
GOBP_GLUTAMINE_METABOLIC_PROCESS	GOBP_GLUTAMINE_METABOLIC_PROCESS		15	0.558153	1.44774	0.076225	0.149875	1	169	tags=13%, list=1%, signal=14%
HP_BUPHTHALMOS	HP_BUPHTHALMOS		18	0.560232	1.44768	0.0762411	0.149853	1	1248	tags=28%, list=11%, signal=31%
GOBP_VASCULOGENESIS	GOBP_VASCULOGENESIS		59	0.444682	1.44746	0.0577223	0.150013	1	1885	tags=39%, list=16%, signal=46%
HP_POSITIONAL_FOOT_DEFORMITY	HP_POSITIONAL_FOOT_DEFORMITY		283	0.358736	1.44733	0.00394737	0.150068	1	1941	tags=23%, list=16%, signal=27%
GOBP_PROTEIN_CONTAINING_COMPLEX_REMODELING	GOBP_PROTEIN_CONTAINING_COMPLEX_REMODELING		19	0.564171	1.44696	0.0779661	0.150395	1	2515	tags=53%, list=21%, signal=67%
GSE13762_CTRL_VS_125_VITAMIND_DAY5_DC_DN	GSE13762_CTRL_VS_125_VITAMIND_DAY5_DC_DN		82	0.42004	1.44687	0.037037	0.15041	1	2224	tags=30%, list=19%, signal=37%
GOBP_LIPID_LOCALIZATION	GOBP_LIPID_LOCALIZATION		312	0.359236	1.44653	0.00764331	0.150707	1	2374	tags=29%, list=20%, signal=35%
HP_CUTIS_MARMORATA	HP_CUTIS_MARMORATA		62	0.443216	1.44641	0.0477658	0.150752	1	1040	tags=19%, list=9%, signal=21%
GOBP_REGULATION_OF_MORPHOGENESIS_OF_A_BRANCHING_STRUCTURE	GOBP_REGULATION_OF_MORPHOGENESIS_OF_A_BRANCHING_STRUCTURE		31	0.499035	1.44586	0.059727	0.151313	1	643	tags=32%, list=5%, signal=34%
GOBP_CELLULAR_COMPONENT_MAINTENANCE	GOBP_CELLULAR_COMPONENT_MAINTENANCE		44	0.465611	1.44565	0.0463259	0.151472	1	2431	tags=45%, list=21%, signal=57%
GSE17721_PAM3CSK4_VS_GADIQUIMOD_0.5H_BMDC_UP	GSE17721_PAM3CSK4_VS_GADIQUIMOD_0.5H_BMDC_UP		135	0.391736	1.44543	0.0225035	0.151628	1	1992	tags=25%, list=17%, signal=30%
HP_PLEURAL_EFFUSION	HP_PLEURAL_EFFUSION		43	0.467224	1.44488	0.0665557	0.152161	1	1967	tags=30%, list=17%, signal=36%
GSE3039_CD4_TCELL_VS_B1_BCELL_UP	GSE3039_CD4_TCELL_VS_B1_BCELL_UP		152	0.386955	1.44482	0.0260989	0.152144	1	2151	tags=27%, list=18%, signal=33%
GSE9650_GP33_VS_GP276_LCMV_SPECIFIC_EXHAUSTED_CD8_TCELL_UP	GSE9650_GP33_VS_GP276_LCMV_SPECIFIC_EXHAUSTED_CD8_TCELL_UP		127	0.394946	1.44474	0.0236686	0.152155	1	2655	tags=34%, list=22%, signal=43%
GSE36888_UNTREATED_VS_IL2_TREATED_TCELL_2H_DN	GSE36888_UNTREATED_VS_IL2_TREATED_TCELL_2H_DN		132	0.394062	1.44456	0.018598	0.152245	1	1814	tags=24%, list=15%, signal=28%
GOBP_MEMORY	GOBP_MEMORY		61	0.440301	1.4445	0.0531108	0.152224	1	1299	tags=25%, list=11%, signal=27%
HP_ABNORMAL_LIGHT_AND_DARK_ADAPTED_ELECTRORETINOGRAM	HP_ABNORMAL_LIGHT_AND_DARK_ADAPTED_ELECTRORETINOGRAM		17	0.558289	1.44435	0.0834725	0.152308	1	2497	tags=53%, list=21%, signal=67%
GSE21360_TERTIARY_VS_QUATERNARY_MEMORY_CD8_TCELL_UP	GSE21360_TERTIARY_VS_QUATERNARY_MEMORY_CD8_TCELL_UP		161	0.384978	1.44414	0.0155587	0.152474	1	2487	tags=32%, list=21%, signal=40%
HP_ABNORMALITY_OF_THE_SPINAL_CORD	HP_ABNORMALITY_OF_THE_SPINAL_CORD		224	0.368722	1.44401	0.00651891	0.152535	1	1833	tags=20%, list=16%, signal=23%
GOBP_RESPONSE_TO_EXTRACELLULAR_STIMULUS	GOBP_RESPONSE_TO_EXTRACELLULAR_STIMULUS		323	0.358667	1.44399	0.00127389	0.152478	1	1499	tags=18%, list=13%, signal=20%
HP_ABNORMAL_DIAPHYSIS_MORPHOLOGY	HP_ABNORMAL_DIAPHYSIS_MORPHOLOGY		217	0.370671	1.44399	0.00536193	0.152396	1	1730	tags=24%, list=15%, signal=27%
KEGG_ADHERENS_JUNCTION	KEGG_ADHERENS_JUNCTION		67	0.440956	1.44359	0.0408805	0.152771	1	2425	tags=40%, list=21%, signal=50%
KENNEDY_PBMC_DRYVAX_AGE_18_40YO_STIMULATED_VS_UNSTIMULATED_1_TO_48MO_TOP_DEG_DN	KENNEDY_PBMC_DRYVAX_AGE_18_40YO_STIMULATED_VS_UNSTIMULATED_1_TO_48MO_TOP_DEG_DN		20	0.555393	1.44358	0.0855705	0.152694	1	1773	tags=45%, list=15%, signal=53%
GOBP_HYDROGEN_PEROXIDE_METABOLIC_PROCESS	GOBP_HYDROGEN_PEROXIDE_METABOLIC_PROCESS		29	0.509858	1.44358	0.0708535	0.152609	1	2409	tags=41%, list=20%, signal=52%
GSE26030_UNSTIM_VS_RESTIM_TH17_DAY5_POST_POLARIZATION_DN	GSE26030_UNSTIM_VS_RESTIM_TH17_DAY5_POST_POLARIZATION_DN		160	0.383138	1.44328	0.00725689	0.152869	1	1878	tags=27%, list=16%, signal=32%
HP_ABNORMAL_FEMORAL_HEAD_MORPHOLOGY	HP_ABNORMAL_FEMORAL_HEAD_MORPHOLOGY		53	0.453125	1.44307	0.0552995	0.153036	1	1917	tags=26%, list=16%, signal=31%
GSE18791_CTRL_VS_NEWCASTLE_VIRUS_DC_1H_DN	GSE18791_CTRL_VS_NEWCASTLE_VIRUS_DC_1H_DN		105	0.402286	1.44304	0.03207	0.152978	1	1225	tags=22%, list=10%, signal=24%
GSE17974_IL4_AND_ANTI_IL12_VS_UNTREATED_1H_ACT_CD4_TCELL_DN	GSE17974_IL4_AND_ANTI_IL12_VS_UNTREATED_1H_ACT_CD4_TCELL_DN		88	0.420403	1.443	0.0244275	0.152938	1	1357	tags=27%, list=11%, signal=31%
HP_ABNORMAL_PELVIS_BONE_MORPHOLOGY	HP_ABNORMAL_PELVIS_BONE_MORPHOLOGY		19	0.56312	1.44291	0.0690846	0.152941	1	1618	tags=26%, list=14%, signal=30%
GSE10094_LCMV_VS_LISTERIA_IND_EFF_CD4_TCELL_DN	GSE10094_LCMV_VS_LISTERIA_IND_EFF_CD4_TCELL_DN		117	0.40482	1.44282	0.0242857	0.152955	1	2039	tags=32%, list=17%, signal=38%
GSE42021_CD24INT_VS_CD24LOW_TREG_THYMUS_DN	GSE42021_CD24INT_VS_CD24LOW_TREG_THYMUS_DN		131	0.396304	1.44265	0.0127298	0.15306	1	1366	tags=17%, list=12%, signal=19%
GOBP_SENSORY_PERCEPTION_OF_LIGHT_STIMULUS	GOBP_SENSORY_PERCEPTION_OF_LIGHT_STIMULUS		92	0.412106	1.44241	0.0287443	0.153245	1	1401	tags=23%, list=12%, signal=26%
HP_CRANIAL_HYPEROSTOSIS	HP_CRANIAL_HYPEROSTOSIS		39	0.489281	1.44207	0.0577558	0.153568	1	1689	tags=28%, list=14%, signal=33%
GOBP_AORTIC_VALVE_MORPHOGENESIS	GOBP_AORTIC_VALVE_MORPHOGENESIS		24	0.529406	1.44203	0.0667808	0.153529	1	1416	tags=58%, list=12%, signal=66%
GSE20715_WT_VS_TLR4_KO_LUNG_UP	GSE20715_WT_VS_TLR4_KO_LUNG_UP		162	0.383483	1.44201	0.0142045	0.153454	1	1436	tags=18%, list=12%, signal=20%
HP_SHALLOW_ORBITS	HP_SHALLOW_ORBITS		22	0.53666	1.44193	0.0748299	0.153462	1	824	tags=27%, list=7%, signal=29%
GOMF_CALCIUM_DEPENDENT_PROTEIN_BINDING	GOMF_CALCIUM_DEPENDENT_PROTEIN_BINDING		42	0.466405	1.44151	0.0486224	0.153871	1	1721	tags=29%, list=15%, signal=33%
HP_CHOANAL_STENOSIS	HP_CHOANAL_STENOSIS		17	0.566351	1.44131	0.084507	0.154004	1	1836	tags=53%, list=16%, signal=63%
GOBP_MORPHOGENESIS_OF_EMBRYONIC_EPITHELIUM	GOBP_MORPHOGENESIS_OF_EMBRYONIC_EPITHELIUM		102	0.404623	1.44104	0.0294985	0.154238	1	1441	tags=25%, list=12%, signal=29%
RB_P130_DN.V1_UP	RB_P130_DN.V1_UP		84	0.418541	1.44096	0.0299401	0.154254	1	2291	tags=30%, list=19%, signal=37%
GOBP_POSITIVE_REGULATION_OF_CELL_PROJECTION_ORGANIZATION	GOBP_POSITIVE_REGULATION_OF_CELL_PROJECTION_ORGANIZATION		260	0.359969	1.44059	0.00642674	0.154612	1	2645	tags=32%, list=22%, signal=41%
GOBP_REGULATION_OF_CELLULAR_RESPONSE_TO_TRANSFORMING_GROWTH_FACTOR_BETA_STIMULUS	GOBP_REGULATION_OF_CELLULAR_RESPONSE_TO_TRANSFORMING_GROWTH_FACTOR_BETA_STIMULUS		92	0.41434	1.44034	0.0228659	0.154835	1	1888	tags=32%, list=16%, signal=37%
GOBP_NEGATIVE_REGULATION_OF_INTRINSIC_APOPTOTIC_SIGNALING_PATHWAY	GOBP_NEGATIVE_REGULATION_OF_INTRINSIC_APOPTOTIC_SIGNALING_PATHWAY		76	0.4309	1.43981	0.042618	0.155367	1	782	tags=14%, list=7%, signal=15%
GSE17721_ALL_VS_24H_PAM3CSK4_BMDC_UP	GSE17721_ALL_VS_24H_PAM3CSK4_BMDC_UP		156	0.382834	1.43965	0.0149864	0.155462	1	2765	tags=32%, list=23%, signal=41%
GOBP_MORPHOGENESIS_OF_AN_ENDOTHELIUM	GOBP_MORPHOGENESIS_OF_AN_ENDOTHELIUM		16	0.572349	1.43915	0.0877797	0.155957	1	2848	tags=63%, list=24%, signal=82%
GOBP_BODY_MORPHOGENESIS	GOBP_BODY_MORPHOGENESIS		36	0.483162	1.43896	0.0566038	0.156088	1	964	tags=28%, list=8%, signal=30%
GOBP_DEFENSE_RESPONSE_TO_GRAM_NEGATIVE_BACTERIUM	GOBP_DEFENSE_RESPONSE_TO_GRAM_NEGATIVE_BACTERIUM		34	0.492402	1.43886	0.0642504	0.156128	1	1271	tags=29%, list=11%, signal=33%
RPS14_DN.V1_UP	RPS14_DN.V1_UP		142	0.389023	1.43858	0.0283286	0.156385	1	2202	tags=35%, list=19%, signal=42%
GOBP_REGULATION_OF_STEROID_BIOSYNTHETIC_PROCESS	GOBP_REGULATION_OF_STEROID_BIOSYNTHETIC_PROCESS		66	0.435242	1.4383	0.0359477	0.15663	1	1416	tags=21%, list=12%, signal=24%
GOBP_T_HELPER_1_TYPE_IMMUNE_RESPONSE	GOBP_T_HELPER_1_TYPE_IMMUNE_RESPONSE		35	0.484757	1.43801	0.0619902	0.156902	1	3598	tags=60%, list=30%, signal=86%
HALLMARK_HEDGEHOG_SIGNALING	HALLMARK_HEDGEHOG_SIGNALING		28	0.509041	1.43797	0.0699187	0.156869	1	2530	tags=50%, list=21%, signal=63%
GSE28237_EARLY_VS_LATE_GC_BCELL_UP	GSE28237_EARLY_VS_LATE_GC_BCELL_UP		117	0.398671	1.43782	0.0311111	0.156959	1	1634	tags=21%, list=14%, signal=25%
GOBP_NEGATIVE_REGULATION_OF_VIRAL_PROCESS	GOBP_NEGATIVE_REGULATION_OF_VIRAL_PROCESS		57	0.4431	1.43774	0.0497592	0.156975	1	1136	tags=14%, list=10%, signal=15%
HP_DERMAL_ATROPHY	HP_DERMAL_ATROPHY		70	0.434212	1.43768	0.0467742	0.156956	1	776	tags=20%, list=7%, signal=21%
GSE2128_CTRL_VS_MIMETOPE_NEGATIVE_SELECTION_DP_THYMOCYTE_NOD_UP	GSE2128_CTRL_VS_MIMETOPE_NEGATIVE_SELECTION_DP_THYMOCYTE_NOD_UP		173	0.384194	1.43756	0.0144737	0.157009	1	2797	tags=37%, list=24%, signal=48%
QIU_PBMC_HEPTATITIS_B_SURFACE_ANTIGEN_AGE_UNDER50_NON_RESPONDERS_VS_RESPONDERS_7DY_UP	QIU_PBMC_HEPTATITIS_B_SURFACE_ANTIGEN_AGE_UNDER50_NON_RESPONDERS_VS_RESPONDERS_7DY_UP		20	0.542037	1.43752	0.0708117	0.156976	1	1782	tags=40%, list=15%, signal=47%
GSE19941_IL10_KO_VS_IL10_KO_AND_NFKBP50_KO_UNSTIM_MACROPHAGE_DN	GSE19941_IL10_KO_VS_IL10_KO_AND_NFKBP50_KO_UNSTIM_MACROPHAGE_DN		151	0.387416	1.43722	0.0151099	0.157238	1	2481	tags=36%, list=21%, signal=45%
GSE7460_WT_VS_FOXP3_HET_ACT_TCONV_UP	GSE7460_WT_VS_FOXP3_HET_ACT_TCONV_UP		156	0.385437	1.43705	0.0190736	0.157351	1	2452	tags=30%, list=21%, signal=38%
HOWARD_DENDRITIC_CELL_INACT_MONOV_INFLUENZA_A_INDONESIA_05_2005_H5N1_AGE_18_49YO_1DY_DN	HOWARD_DENDRITIC_CELL_INACT_MONOV_INFLUENZA_A_INDONESIA_05_2005_H5N1_AGE_18_49YO_1DY_DN		25	0.520761	1.43701	0.0759931	0.15731	1	1760	tags=44%, list=15%, signal=52%
GOMF_ISOPRENOID_BINDING	GOMF_ISOPRENOID_BINDING		17	0.575763	1.43653	0.0912409	0.157804	1	1952	tags=53%, list=17%, signal=63%
GSE24574_BCL6_LOW_TFH_VS_NAIVE_CD4_TCELL_DN	GSE24574_BCL6_LOW_TFH_VS_NAIVE_CD4_TCELL_DN		134	0.386524	1.4365	0.0281065	0.157759	1	1803	tags=28%, list=15%, signal=33%
GSE26488_CTRL_VS_PEPTIDE_INJECTION_HDAC7_DELTAP_TG_OT2_THYMOCYTE_UP	GSE26488_CTRL_VS_PEPTIDE_INJECTION_HDAC7_DELTAP_TG_OT2_THYMOCYTE_UP		106	0.405687	1.43647	0.011994	0.157709	1	955	tags=24%, list=8%, signal=25%
GOBP_DEVELOPMENTAL_MATURATION	GOBP_DEVELOPMENTAL_MATURATION		171	0.379824	1.43611	0.0138889	0.158028	1	1913	tags=29%, list=16%, signal=34%
GOBP_RENAL_TUBULE_DEVELOPMENT	GOBP_RENAL_TUBULE_DEVELOPMENT		50	0.45203	1.43606	0.0409836	0.158007	1	1504	tags=44%, list=13%, signal=50%
ATF2_UP.V1_UP	ATF2_UP.V1_UP		109	0.405019	1.43582	0.0219941	0.158197	1	1331	tags=23%, list=11%, signal=26%
HP_THORACIC_HYPOPLASIA	HP_THORACIC_HYPOPLASIA		104	0.405666	1.43564	0.0269865	0.158343	1	2300	tags=33%, list=19%, signal=40%
GOBP_INNERVATION	GOBP_INNERVATION		15	0.583675	1.43556	0.0778985	0.158351	1	2597	tags=53%, list=22%, signal=68%
GOBP_MESONEPHROS_DEVELOPMENT	GOBP_MESONEPHROS_DEVELOPMENT		56	0.449853	1.43547	0.0635179	0.158373	1	1329	tags=41%, list=11%, signal=46%
GSE39864_WT_VS_GATA3_KO_TREG_UP	GSE39864_WT_VS_GATA3_KO_TREG_UP		146	0.387937	1.43537	0.0210084	0.158405	1	1952	tags=25%, list=17%, signal=30%
GOCC_I_BAND	GOCC_I_BAND		81	0.416974	1.43518	0.0459418	0.158548	1	2304	tags=38%, list=20%, signal=47%
HP_ABNORMALITY_OF_THE_CALF_MUSCULATURE	HP_ABNORMALITY_OF_THE_CALF_MUSCULATURE		52	0.454966	1.43502	0.062701	0.158654	1	1261	tags=29%, list=11%, signal=32%
GOCC_CLATHRIN_COATED_PIT	GOCC_CLATHRIN_COATED_PIT		61	0.444858	1.43478	0.0510511	0.158844	1	1767	tags=26%, list=15%, signal=31%
GSE39152_SPLEEN_CD103_NEG_VS_BRAIN_CD103_POS_MEMORY_CD8_TCELL_DN	GSE39152_SPLEEN_CD103_NEG_VS_BRAIN_CD103_POS_MEMORY_CD8_TCELL_DN		137	0.386115	1.43475	0.0271041	0.158801	1	1987	tags=25%, list=17%, signal=29%
GOBP_MEMBRANE_PROTEIN_PROTEOLYSIS	GOBP_MEMBRANE_PROTEIN_PROTEOLYSIS		55	0.449636	1.43445	0.0461049	0.159053	1	2692	tags=33%, list=23%, signal=42%
GOBP_EMBRYONIC_EYE_MORPHOGENESIS	GOBP_EMBRYONIC_EYE_MORPHOGENESIS		23	0.528768	1.43414	0.0887372	0.159339	1	1273	tags=30%, list=11%, signal=34%
GSE360_T_GONDII_VS_M_TUBERCULOSIS_MAC_DN	GSE360_T_GONDII_VS_M_TUBERCULOSIS_MAC_DN		138	0.388185	1.43388	0.0215208	0.159562	1	1620	tags=20%, list=14%, signal=22%
GOBP_ACTIVATION_OF_PROTEIN_KINASE_B_ACTIVITY	GOBP_ACTIVATION_OF_PROTEIN_KINASE_B_ACTIVITY		27	0.511025	1.43381	0.0749574	0.159559	1	2257	tags=37%, list=19%, signal=46%
ESC_J1_UP_EARLY.V1_DN	ESC_J1_UP_EARLY.V1_DN		136	0.387895	1.43359	0.0186514	0.159727	1	1521	tags=22%, list=13%, signal=25%
GSE36826_NORMAL_VS_STAPH_AUREUS_INF_SKIN_UP	GSE36826_NORMAL_VS_STAPH_AUREUS_INF_SKIN_UP		161	0.383158	1.43336	0.02213	0.159946	1	1591	tags=20%, list=13%, signal=23%
GOBP_RHYTHMIC_PROCESS	GOBP_RHYTHMIC_PROCESS		196	0.374419	1.43321	0.00947226	0.160021	1	1302	tags=18%, list=11%, signal=20%
GOBP_REGULATION_OF_VOLTAGE_GATED_CALCIUM_CHANNEL_ACTIVITY	GOBP_REGULATION_OF_VOLTAGE_GATED_CALCIUM_CHANNEL_ACTIVITY		20	0.534461	1.43321	0.0954003	0.159934	1	1240	tags=25%, list=10%, signal=28%
GSE43700_UNTREATED_VS_IL10_TREATED_PBMC_UP	GSE43700_UNTREATED_VS_IL10_TREATED_PBMC_UP		140	0.3895	1.43314	0.0167131	0.159931	1	1044	tags=16%, list=9%, signal=17%
GSE20715_0H_VS_6H_OZONE_LUNG_DN	GSE20715_0H_VS_6H_OZONE_LUNG_DN		156	0.37986	1.43305	0.0169014	0.159957	1	2278	tags=31%, list=19%, signal=38%
GSE3039_CD4_TCELL_VS_ALPHAALPHA_CD8_TCELL_UP	GSE3039_CD4_TCELL_VS_ALPHAALPHA_CD8_TCELL_UP		167	0.380817	1.43304	0.013624	0.159889	1	1656	tags=19%, list=14%, signal=21%
GOBP_EMBRYONIC_APPENDAGE_MORPHOGENESIS	GOBP_EMBRYONIC_APPENDAGE_MORPHOGENESIS		76	0.425225	1.43222	0.049459	0.160772	1	1651	tags=30%, list=14%, signal=35%
HP_SKIN_NODULE	HP_SKIN_NODULE		85	0.419491	1.4319	0.0349014	0.161056	1	1811	tags=28%, list=15%, signal=33%
GSE29618_PDC_VS_MDC_DAY7_FLU_VACCINE_DN	GSE29618_PDC_VS_MDC_DAY7_FLU_VACCINE_DN		157	0.384068	1.43179	0.015919	0.161108	1	1950	tags=28%, list=17%, signal=33%
GSE17721_LPS_VS_CPG_2H_BMDC_UP	GSE17721_LPS_VS_CPG_2H_BMDC_UP		155	0.387399	1.43171	0.0159652	0.161116	1	1107	tags=17%, list=9%, signal=18%
GSE7509_FCGRIIB_VS_TNFA_IL1B_IL6_PGE_STIM_DC_DN	GSE7509_FCGRIIB_VS_TNFA_IL1B_IL6_PGE_STIM_DC_DN		105	0.406919	1.43139	0.0329513	0.161383	1	3361	tags=51%, list=28%, signal=71%
HP_JOINT_HYPERMOBILITY	HP_JOINT_HYPERMOBILITY		264	0.361727	1.43138	0.0115681	0.16131	1	1885	tags=20%, list=16%, signal=24%
GOBP_REGULATION_OF_JNK_CASCADE	GOBP_REGULATION_OF_JNK_CASCADE		102	0.400902	1.43127	0.0319635	0.161358	1	2391	tags=33%, list=20%, signal=41%
HP_MUSCULAR_DYSTROPHY	HP_MUSCULAR_DYSTROPHY		65	0.431986	1.43122	0.0439394	0.161326	1	1309	tags=23%, list=11%, signal=26%
GSE18281_SUBCAPSULAR_CORTICAL_REGION_VS_WHOLE_CORTEX_THYMUS_UP	GSE18281_SUBCAPSULAR_CORTICAL_REGION_VS_WHOLE_CORTEX_THYMUS_UP		157	0.380346	1.43119	0.0166898	0.161277	1	2507	tags=28%, list=21%, signal=35%
GOBP_REGULATION_OF_CELL_SHAPE	GOBP_REGULATION_OF_CELL_SHAPE		132	0.392533	1.43088	0.021645	0.161539	1	2094	tags=33%, list=18%, signal=39%
GSE6259_FLT3L_INDUCED_DEC205_POS_DC_VS_BCELL_UP	GSE6259_FLT3L_INDUCED_DEC205_POS_DC_VS_BCELL_UP		107	0.396452	1.43031	0.035061	0.162184	1	2722	tags=37%, list=23%, signal=48%
GOBP_NEGATIVE_REGULATION_OF_OSTEOCLAST_DIFFERENTIATION	GOBP_NEGATIVE_REGULATION_OF_OSTEOCLAST_DIFFERENTIATION		18	0.55525	1.43028	0.0839416	0.162134	1	3035	tags=50%, list=26%, signal=67%
KEGG_BLADDER_CANCER	KEGG_BLADDER_CANCER		38	0.478483	1.4302	0.0754098	0.162138	1	1944	tags=34%, list=16%, signal=41%
GSE7852_TREG_VS_TCONV_FAT_UP	GSE7852_TREG_VS_TCONV_FAT_UP		173	0.377828	1.43014	0.0163265	0.162118	1	2381	tags=34%, list=20%, signal=41%
GOBP_NEGATIVE_REGULATION_OF_POSTTRANSCRIPTIONAL_GENE_SILENCING	GOBP_NEGATIVE_REGULATION_OF_POSTTRANSCRIPTIONAL_GENE_SILENCING		19	0.543602	1.42996	0.0846847	0.162261	1	1384	tags=32%, list=12%, signal=36%
HP_ABNORMALITY_OF_FEMUR_MORPHOLOGY	HP_ABNORMALITY_OF_FEMUR_MORPHOLOGY		202	0.371267	1.42988	0.0112835	0.162254	1	1644	tags=22%, list=14%, signal=25%
GSE3982_MEMORY_CD4_TCELL_VS_BCELL_UP	GSE3982_MEMORY_CD4_TCELL_VS_BCELL_UP		143	0.387571	1.42987	0.0248276	0.162174	1	2464	tags=34%, list=21%, signal=43%
GOBP_REGULATION_OF_ACTIN_FILAMENT_BUNDLE_ASSEMBLY	GOBP_REGULATION_OF_ACTIN_FILAMENT_BUNDLE_ASSEMBLY		80	0.419675	1.42933	0.0266667	0.162724	1	2711	tags=36%, list=23%, signal=47%
HP_SPINAL_CORD_COMPRESSION	HP_SPINAL_CORD_COMPRESSION		20	0.539242	1.42921	0.111301	0.162779	1	1618	tags=25%, list=14%, signal=29%
HP_PECTUS_EXCAVATUM	HP_PECTUS_EXCAVATUM		211	0.366284	1.42882	0.0109439	0.163173	1	2007	tags=23%, list=17%, signal=27%
BCAT.100_UP.V1_UP	BCAT.100_UP.V1_UP		30	0.505851	1.42881	0.0711864	0.163107	1	1309	tags=30%, list=11%, signal=34%
GOMF_CHEMOKINE_ACTIVITY	GOMF_CHEMOKINE_ACTIVITY		20	0.552603	1.42866	0.0706897	0.163192	1	653	tags=30%, list=6%, signal=32%
HP_VENOUS_INSUFFICIENCY	HP_VENOUS_INSUFFICIENCY		29	0.510273	1.42853	0.078125	0.163262	1	1967	tags=38%, list=17%, signal=45%
GSE42021_CD24HI_VS_CD24INT_TCONV_THYMUS_DN	GSE42021_CD24HI_VS_CD24INT_TCONV_THYMUS_DN		138	0.392023	1.42793	0.0249633	0.163877	1	2319	tags=30%, list=20%, signal=37%
HP_BLOODY_DIARRHEA	HP_BLOODY_DIARRHEA		32	0.491464	1.42788	0.0740132	0.163849	1	1933	tags=31%, list=16%, signal=37%
GSE22025_UNTREATED_VS_PROGESTERONE_TREATED_CD4_TCELL_UP	GSE22025_UNTREATED_VS_PROGESTERONE_TREATED_CD4_TCELL_UP		128	0.393593	1.42765	0.033046	0.164051	1	1630	tags=25%, list=14%, signal=29%
HOFT_CD4_POSITIVE_ALPHA_BETA_MEMORY_T_CELL_BCG_VACCINE_AGE_18_45YO_7DY_UP	HOFT_CD4_POSITIVE_ALPHA_BETA_MEMORY_T_CELL_BCG_VACCINE_AGE_18_45YO_7DY_UP		30	0.500148	1.42728	0.0761421	0.164398	1	2986	tags=43%, list=25%, signal=58%
GSE29949_MICROGLIA_BRAIN_VS_CD8_NEG_DC_SPLEEN_DN	GSE29949_MICROGLIA_BRAIN_VS_CD8_NEG_DC_SPLEEN_DN		124	0.394678	1.42698	0.0231548	0.164672	1	957	tags=19%, list=8%, signal=20%
GSE17974_IL4_AND_ANTI_IL12_VS_UNTREATED_6H_ACT_CD4_TCELL_UP	GSE17974_IL4_AND_ANTI_IL12_VS_UNTREATED_6H_ACT_CD4_TCELL_UP		102	0.40358	1.42672	0.0360502	0.164898	1	1814	tags=33%, list=15%, signal=39%
GOBP_REGULATION_OF_STEM_CELL_PROLIFERATION	GOBP_REGULATION_OF_STEM_CELL_PROLIFERATION		29	0.50762	1.42656	0.0679934	0.165006	1	1816	tags=38%, list=15%, signal=45%
GSE7852_TREG_VS_TCONV_THYMUS_UP	GSE7852_TREG_VS_TCONV_THYMUS_UP		160	0.377908	1.42631	0.0178326	0.165213	1	2202	tags=30%, list=19%, signal=36%
HP_OVERLAPPING_FINGERS	HP_OVERLAPPING_FINGERS		20	0.55057	1.42625	0.0778761	0.165202	1	749	tags=20%, list=6%, signal=21%
GOBP_CARDIOCYTE_DIFFERENTIATION	GOBP_CARDIOCYTE_DIFFERENTIATION		93	0.408232	1.42623	0.0344311	0.165143	1	1393	tags=27%, list=12%, signal=30%
GSE15659_CD45RA_NEG_CD4_TCELL_VS_ACTIVATED_TREG_UP	GSE15659_CD45RA_NEG_CD4_TCELL_VS_ACTIVATED_TREG_UP		116	0.396397	1.42584	0.0231214	0.16553	1	2134	tags=28%, list=18%, signal=33%
HP_ARTHROGRYPOSIS_MULTIPLEX_CONGENITA	HP_ARTHROGRYPOSIS_MULTIPLEX_CONGENITA		81	0.417282	1.42557	0.0332829	0.16579	1	1141	tags=19%, list=10%, signal=20%
ATM_DN.V1_UP	ATM_DN.V1_UP		74	0.424371	1.42553	0.0531915	0.165746	1	1685	tags=31%, list=14%, signal=36%
GSE19923_WT_VS_HEB_KO_DP_THYMOCYTE_UP	GSE19923_WT_VS_HEB_KO_DP_THYMOCYTE_UP		133	0.390014	1.42552	0.0194715	0.165671	1	1647	tags=24%, list=14%, signal=28%
GSE43955_TH0_VS_TGFB_IL6_TH17_ACT_CD4_TCELL_42H_DN	GSE43955_TH0_VS_TGFB_IL6_TH17_ACT_CD4_TCELL_42H_DN		137	0.385742	1.42541	0.0263158	0.16572	1	1734	tags=22%, list=15%, signal=25%
OVSYANNIKOVA_PBMC_FLUARIX_AGE_50_74YO_COMMON_WITH_BOTH_HAI_AND_VNA_28DY_VS_3DY_USED_IN_HAI_AND_VNA_RESPONSE_MODELS_UP	OVSYANNIKOVA_PBMC_FLUARIX_AGE_50_74YO_COMMON_WITH_BOTH_HAI_AND_VNA_28DY_VS_3DY_USED_IN_HAI_AND_VNA_RESPONSE_MODELS_UP		23	0.521932	1.42533	0.0847458	0.165722	1	1454	tags=17%, list=12%, signal=20%
GOBP_REGULATION_OF_STEROID_METABOLIC_PROCESS	GOBP_REGULATION_OF_STEROID_METABOLIC_PROCESS		85	0.411519	1.42533	0.0335878	0.165637	1	2667	tags=33%, list=23%, signal=42%
HP_ABNORMAL_MITRAL_VALVE_MORPHOLOGY	HP_ABNORMAL_MITRAL_VALVE_MORPHOLOGY		90	0.41061	1.42523	0.0339233	0.165688	1	2311	tags=38%, list=20%, signal=47%
GOBP_POSITIVE_REGULATION_OF_ANION_TRANSPORT	GOBP_POSITIVE_REGULATION_OF_ANION_TRANSPORT		332	0.352172	1.42518	0.00627353	0.165665	1	1958	tags=23%, list=17%, signal=27%
GOBP_REGULATION_OF_CYCLASE_ACTIVITY	GOBP_REGULATION_OF_CYCLASE_ACTIVITY		21	0.539882	1.42508	0.0843373	0.165697	1	1234	tags=38%, list=10%, signal=42%
GOBP_TRANSMISSION_OF_NERVE_IMPULSE	GOBP_TRANSMISSION_OF_NERVE_IMPULSE		24	0.531155	1.42501	0.0711805	0.165688	1	2000	tags=46%, list=17%, signal=55%
GOBP_POSITIVE_REGULATION_OF_TRANSCRIPTION_FROM_RNA_POLYMERASE_II_PROMOTER_IN_RESPONSE_TO_STRESS	GOBP_POSITIVE_REGULATION_OF_TRANSCRIPTION_FROM_RNA_POLYMERASE_II_PROMOTER_IN_RESPONSE_TO_STRESS		20	0.553521	1.42481	0.110155	0.165865	1	973	tags=25%, list=8%, signal=27%
GOBP_REGULATION_OF_STRESS_ACTIVATED_PROTEIN_KINASE_SIGNALING_CASCADE	GOBP_REGULATION_OF_STRESS_ACTIVATED_PROTEIN_KINASE_SIGNALING_CASCADE		146	0.378988	1.42454	0.022695	0.166118	1	2311	tags=32%, list=20%, signal=39%
HP_ABNORMALLY_LAX_OR_HYPEREXTENSIBLE_SKIN	HP_ABNORMALLY_LAX_OR_HYPEREXTENSIBLE_SKIN		122	0.392142	1.42437	0.0311573	0.166253	1	1884	tags=26%, list=16%, signal=31%
GSE19923_E2A_KO_VS_HEB_AND_E2A_KO_DP_THYMOCYTE_UP	GSE19923_E2A_KO_VS_HEB_AND_E2A_KO_DP_THYMOCYTE_UP		163	0.380079	1.42419	0.0194444	0.166376	1	1606	tags=21%, list=14%, signal=24%
GSE40274_CTRL_VS_IRF4_TRANSDUCED_ACTIVATED_CD4_TCELL_UP	GSE40274_CTRL_VS_IRF4_TRANSDUCED_ACTIVATED_CD4_TCELL_UP		128	0.387971	1.42361	0.0269504	0.166994	1	1970	tags=23%, list=17%, signal=28%
HP_LIMITATION_OF_NECK_MOTION	HP_LIMITATION_OF_NECK_MOTION		18	0.550393	1.42343	0.0897666	0.167115	1	1821	tags=39%, list=15%, signal=46%
GSE17721_CTRL_VS_LPS_8H_BMDC_DN	GSE17721_CTRL_VS_LPS_8H_BMDC_DN		144	0.387939	1.42337	0.0182841	0.167094	1	1770	tags=26%, list=15%, signal=30%
GSE27670_CTRL_VS_LMP1_TRANSDUCED_GC_BCELL_DN	GSE27670_CTRL_VS_LMP1_TRANSDUCED_GC_BCELL_DN		169	0.375783	1.42308	0.0176152	0.167351	1	2880	tags=36%, list=24%, signal=47%
GOBP_GLUTAMINE_FAMILY_AMINO_ACID_CATABOLIC_PROCESS	GOBP_GLUTAMINE_FAMILY_AMINO_ACID_CATABOLIC_PROCESS		17	0.562101	1.42285	0.08	0.167554	1	932	tags=29%, list=8%, signal=32%
HP_MIGRAINE	HP_MIGRAINE		83	0.410546	1.42282	0.0421687	0.167508	1	1596	tags=22%, list=14%, signal=25%
GSE12198_CTRL_VS_HIGH_IL2_STIM_NK_CELL_UP	GSE12198_CTRL_VS_HIGH_IL2_STIM_NK_CELL_UP		136	0.39137	1.42274	0.0240113	0.167501	1	1966	tags=23%, list=17%, signal=27%
GOBP_POSITIVE_REGULATION_OF_PROTEIN_MATURATION	GOBP_POSITIVE_REGULATION_OF_PROTEIN_MATURATION		15	0.583262	1.42273	0.084991	0.167429	1	1819	tags=40%, list=15%, signal=47%
KRAS.50_UP.V1_DN	KRAS.50_UP.V1_DN		18	0.551381	1.42199	0.0865874	0.168239	1	1224	tags=33%, list=10%, signal=37%
GOBP_MITOTIC_CELL_CYCLE_ARREST	GOBP_MITOTIC_CELL_CYCLE_ARREST		15	0.582516	1.42193	0.103509	0.168233	1	1708	tags=40%, list=14%, signal=47%
BMI1_DN.V1_DN	BMI1_DN.V1_DN		94	0.410061	1.42187	0.0384068	0.168215	1	1280	tags=19%, list=11%, signal=21%
GSE46242_TH1_VS_ANERGIC_TH1_CD4_TCELL_WITH_EGR2_DELETED_UP	GSE46242_TH1_VS_ANERGIC_TH1_CD4_TCELL_WITH_EGR2_DELETED_UP		147	0.378356	1.42159	0.0294985	0.168476	1	2469	tags=27%, list=21%, signal=34%
GOCC_TERTIARY_GRANULE	GOCC_TERTIARY_GRANULE		119	0.393804	1.42136	0.03125	0.168679	1	1738	tags=22%, list=15%, signal=25%
GSE8921_UNSTIM_VS_TLR1_2_STIM_MONOCYTE_24H_DN	GSE8921_UNSTIM_VS_TLR1_2_STIM_MONOCYTE_24H_DN		155	0.379348	1.42126	0.0127841	0.1687	1	1403	tags=17%, list=12%, signal=20%
GSE360_CTRL_VS_T_GONDII_MAC_DN	GSE360_CTRL_VS_T_GONDII_MAC_DN		163	0.377089	1.42114	0.0152778	0.168766	1	1164	tags=18%, list=10%, signal=19%
GOMF_CATALYTIC_ACTIVITY_ACTING_ON_A_GLYCOPROTEIN	GOMF_CATALYTIC_ACTIVITY_ACTING_ON_A_GLYCOPROTEIN		17	0.557734	1.42105	0.090136	0.168797	1	1262	tags=35%, list=11%, signal=39%
GOBP_SPECIFICATION_OF_ANIMAL_ORGAN_IDENTITY	GOBP_SPECIFICATION_OF_ANIMAL_ORGAN_IDENTITY		22	0.537401	1.42101	0.0711805	0.168752	1	1349	tags=41%, list=11%, signal=46%
GOBP_GRANULOCYTE_MIGRATION	GOBP_GRANULOCYTE_MIGRATION		95	0.409234	1.42088	0.0489297	0.168838	1	2010	tags=35%, list=17%, signal=42%
HP_DISTAL_MUSCLE_WEAKNESS	HP_DISTAL_MUSCLE_WEAKNESS		138	0.382415	1.4204	0.020979	0.16931	1	1956	tags=22%, list=17%, signal=27%
HALLMARK_WNT_BETA_CATENIN_SIGNALING	HALLMARK_WNT_BETA_CATENIN_SIGNALING		35	0.481724	1.42031	0.0686275	0.16933	1	2185	tags=37%, list=18%, signal=45%
HP_THORACIC_KYPHOSCOLIOSIS	HP_THORACIC_KYPHOSCOLIOSIS		15	0.579138	1.42025	0.0971524	0.169326	1	958	tags=27%, list=8%, signal=29%
GSE36392_MAC_VS_NEUTROPHIL_IL25_TREATED_LUNG_DN	GSE36392_MAC_VS_NEUTROPHIL_IL25_TREATED_LUNG_DN		141	0.38745	1.42021	0.0212465	0.169291	1	1398	tags=23%, list=12%, signal=26%
HP_APLASIA_HYPOPLASIA_OF_THE_FEMUR	HP_APLASIA_HYPOPLASIA_OF_THE_FEMUR		39	0.467057	1.42003	0.0610561	0.169425	1	2300	tags=36%, list=19%, signal=44%
GOBP_PHAGOCYTOSIS	GOBP_PHAGOCYTOSIS		219	0.36879	1.42003	0.0203252	0.16934	1	1278	tags=17%, list=11%, signal=19%
HP_CARDIOVASCULAR_CALCIFICATION	HP_CARDIOVASCULAR_CALCIFICATION		24	0.529274	1.41987	0.0947546	0.169461	1	2774	tags=50%, list=23%, signal=65%
GOCC_DENDRITE_MEMBRANE	GOCC_DENDRITE_MEMBRANE		18	0.559056	1.4197	0.0769231	0.169591	1	1540	tags=39%, list=13%, signal=45%
GSE35825_UNTREATED_VS_IFNA_STIM_MACROPHAGE_DN	GSE35825_UNTREATED_VS_IFNA_STIM_MACROPHAGE_DN		136	0.390868	1.41956	0.0266272	0.169664	1	1669	tags=18%, list=14%, signal=21%
GOBP_REGULATION_OF_METAL_ION_TRANSPORT	GOBP_REGULATION_OF_METAL_ION_TRANSPORT		151	0.376257	1.41955	0.0226308	0.169587	1	1627	tags=23%, list=14%, signal=27%
GSE45739_UNSTIM_VS_ACD3_ACD28_STIM_WT_CD4_TCELL_UP	GSE45739_UNSTIM_VS_ACD3_ACD28_STIM_WT_CD4_TCELL_UP		155	0.377562	1.41947	0.0259918	0.169589	1	1618	tags=25%, list=14%, signal=29%
GSE3920_IFNA_VS_IFNB_TREATED_ENDOTHELIAL_CELL_UP	GSE3920_IFNA_VS_IFNB_TREATED_ENDOTHELIAL_CELL_UP		141	0.385926	1.41912	0.025974	0.16995	1	1946	tags=30%, list=16%, signal=35%
GOBP_MACROPHAGE_DIFFERENTIATION	GOBP_MACROPHAGE_DIFFERENTIATION		34	0.484436	1.41902	0.0653595	0.169987	1	774	tags=21%, list=7%, signal=22%
GSE13484_UNSTIM_VS_YF17D_VACCINE_STIM_PBMC_DN	GSE13484_UNSTIM_VS_YF17D_VACCINE_STIM_PBMC_DN		151	0.377976	1.41878	0.0214286	0.170212	1	2095	tags=22%, list=18%, signal=26%
GOCC_SPECIFIC_GRANULE	GOCC_SPECIFIC_GRANULE		127	0.383899	1.41875	0.0399429	0.170164	1	1738	tags=22%, list=15%, signal=26%
GSE9988_LPS_VS_LOW_LPS_MONOCYTE_DN	GSE9988_LPS_VS_LOW_LPS_MONOCYTE_DN		78	0.419414	1.4182	0.0416048	0.170777	1	1148	tags=21%, list=10%, signal=23%
GOMF_PHOSPHOLIPASE_C_ACTIVITY	GOMF_PHOSPHOLIPASE_C_ACTIVITY		18	0.550356	1.41819	0.0949153	0.170691	1	1269	tags=39%, list=11%, signal=44%
GOBP_POSITIVE_REGULATION_OF_CELL_CELL_ADHESION	GOBP_POSITIVE_REGULATION_OF_CELL_CELL_ADHESION		214	0.368845	1.41781	0.0132275	0.171086	1	1977	tags=27%, list=17%, signal=31%
GOBP_CELL_CELL_JUNCTION_ASSEMBLY	GOBP_CELL_CELL_JUNCTION_ASSEMBLY		91	0.410558	1.4177	0.0427729	0.171135	1	2371	tags=37%, list=20%, signal=46%
GSE42088_UNINF_VS_LEISHMANIA_INF_DC_2H_DN	GSE42088_UNINF_VS_LEISHMANIA_INF_DC_2H_DN		146	0.38036	1.4175	0.0242511	0.171312	1	867	tags=18%, list=7%, signal=19%
GOMF_PATTERN_RECOGNITION_RECEPTOR_ACTIVITY	GOMF_PATTERN_RECOGNITION_RECEPTOR_ACTIVITY		16	0.581887	1.41741	0.079932	0.171337	1	1625	tags=38%, list=14%, signal=43%
HP_ABNORMALITY_OF_THE_DIENCEPHALON	HP_ABNORMALITY_OF_THE_DIENCEPHALON		76	0.414425	1.41725	0.0440252	0.171448	1	2584	tags=33%, list=22%, signal=42%
GSE8835_HEALTHY_VS_CLL_CD4_TCELL_DN	GSE8835_HEALTHY_VS_CLL_CD4_TCELL_DN		123	0.3897	1.41687	0.037037	0.17187	1	2307	tags=31%, list=20%, signal=38%
GOBP_REGULATION_OF_BINDING	GOBP_REGULATION_OF_BINDING		273	0.35495	1.41647	0.0103493	0.172278	1	1883	tags=21%, list=16%, signal=24%
ATF2_S_UP.V1_UP	ATF2_S_UP.V1_UP		97	0.404367	1.41639	0.0345345	0.172294	1	1986	tags=34%, list=17%, signal=41%
GOMF_CARBOHYDRATE_BINDING	GOMF_CARBOHYDRATE_BINDING		161	0.378128	1.41566	0.0163711	0.173171	1	1791	tags=26%, list=15%, signal=30%
GOBP_REGULATION_OF_MACROPHAGE_CHEMOTAXIS	GOBP_REGULATION_OF_MACROPHAGE_CHEMOTAXIS		20	0.536368	1.41546	0.10052	0.173331	1	1985	tags=45%, list=17%, signal=54%
GOBP_REGULATION_OF_SYNAPTIC_TRANSMISSION_GLUTAMATERGIC	GOBP_REGULATION_OF_SYNAPTIC_TRANSMISSION_GLUTAMATERGIC		30	0.511118	1.41545	0.0747967	0.173252	1	887	tags=30%, list=8%, signal=32%
HP_MODERATE_GLOBAL_DEVELOPMENTAL_DELAY	HP_MODERATE_GLOBAL_DEVELOPMENTAL_DELAY		15	0.58242	1.41532	0.0998185	0.173342	1	62	tags=7%, list=1%, signal=7%
GOCC_CILIARY_TIP	GOCC_CILIARY_TIP		40	0.472752	1.41521	0.0805687	0.173386	1	3145	tags=43%, list=27%, signal=58%
HP_MUSCLE_HYPERTROPHY_OF_THE_LOWER_EXTREMITIES	HP_MUSCLE_HYPERTROPHY_OF_THE_LOWER_EXTREMITIES		36	0.486206	1.41508	0.0629252	0.173448	1	1261	tags=31%, list=11%, signal=34%
GOBP_POSITIVE_REGULATION_OF_MYELOID_CELL_DIFFERENTIATION	GOBP_POSITIVE_REGULATION_OF_MYELOID_CELL_DIFFERENTIATION		72	0.418443	1.41499	0.0519685	0.173462	1	1393	tags=21%, list=12%, signal=23%
GOBP_REGULATION_OF_VASCULAR_ASSOCIATED_SMOOTH_MUSCLE_CELL_PROLIFERATION	GOBP_REGULATION_OF_VASCULAR_ASSOCIATED_SMOOTH_MUSCLE_CELL_PROLIFERATION		40	0.464919	1.41499	0.0667752	0.173373	1	1704	tags=38%, list=14%, signal=44%
KEGG_NOD_LIKE_RECEPTOR_SIGNALING_PATHWAY	KEGG_NOD_LIKE_RECEPTOR_SIGNALING_PATHWAY		47	0.453679	1.4147	0.0670827	0.173675	1	608	tags=15%, list=5%, signal=16%
KEGG_ALANINE_ASPARTATE_AND_GLUTAMATE_METABOLISM	KEGG_ALANINE_ASPARTATE_AND_GLUTAMATE_METABOLISM		19	0.534268	1.41461	0.0928571	0.173694	1	1107	tags=21%, list=9%, signal=23%
GOBP_NEGATIVE_REGULATION_OF_PEPTIDE_SECRETION	GOBP_NEGATIVE_REGULATION_OF_PEPTIDE_SECRETION		44	0.461045	1.41426	0.0640809	0.174049	1	809	tags=20%, list=7%, signal=22%
GSE15324_ELF4_KO_VS_WT_NAIVE_CD8_TCELL_UP	GSE15324_ELF4_KO_VS_WT_NAIVE_CD8_TCELL_UP		151	0.381553	1.41376	0.0325779	0.174592	1	2365	tags=32%, list=20%, signal=39%
GSE10239_MEMORY_VS_KLRG1HIGH_EFF_CD8_TCELL_UP	GSE10239_MEMORY_VS_KLRG1HIGH_EFF_CD8_TCELL_UP		130	0.385089	1.41349	0.0271817	0.174823	1	1976	tags=25%, list=17%, signal=29%
HP_ARTHRALGIA	HP_ARTHRALGIA		121	0.394245	1.41348	0.0147493	0.174734	1	1040	tags=17%, list=9%, signal=18%
GSE32164_RESTING_DIFFERENTIATED_VS_ALTERNATIVELY_ACT_M2_MACROPHAGE_UP	GSE32164_RESTING_DIFFERENTIATED_VS_ALTERNATIVELY_ACT_M2_MACROPHAGE_UP		151	0.378187	1.41329	0.0307467	0.174891	1	1663	tags=21%, list=14%, signal=24%
GOBP_MECHANORECEPTOR_DIFFERENTIATION	GOBP_MECHANORECEPTOR_DIFFERENTIATION		37	0.475616	1.41301	0.0656	0.17516	1	1398	tags=30%, list=12%, signal=34%
GSE43955_TH0_VS_TGFB_IL6_TH17_ACT_CD4_TCELL_52H_UP	GSE43955_TH0_VS_TGFB_IL6_TH17_ACT_CD4_TCELL_52H_UP		148	0.380015	1.41288	0.0267606	0.175232	1	1358	tags=22%, list=11%, signal=24%
HP_ABNORMALITY_OF_THE_NASAL_DORSUM	HP_ABNORMALITY_OF_THE_NASAL_DORSUM		162	0.369884	1.41199	0.0142045	0.176272	1	1158	tags=18%, list=10%, signal=20%
GOBP_CELLULAR_RESPONSE_TO_MECHANICAL_STIMULUS	GOBP_CELLULAR_RESPONSE_TO_MECHANICAL_STIMULUS		62	0.429273	1.41179	0.0383387	0.176436	1	1974	tags=32%, list=17%, signal=39%
GSE22886_NAIVE_BCELL_VS_NEUTROPHIL_DN	GSE22886_NAIVE_BCELL_VS_NEUTROPHIL_DN		151	0.378122	1.41092	0.0211566	0.177454	1	1614	tags=22%, list=14%, signal=25%
GSE37534_UNTREATED_VS_PIOGLITAZONE_TREATED_CD4_TCELL_PPARG1_AND_FOXP3_TRASDUCED_DN	GSE37534_UNTREATED_VS_PIOGLITAZONE_TREATED_CD4_TCELL_PPARG1_AND_FOXP3_TRASDUCED_DN		161	0.377958	1.41091	0.0168303	0.177379	1	2454	tags=25%, list=21%, signal=31%
GSE13484_12H_UNSTIM_VS_YF17D_VACCINE_STIM_PBMC_DN	GSE13484_12H_UNSTIM_VS_YF17D_VACCINE_STIM_PBMC_DN		143	0.380004	1.41063	0.024531	0.177623	1	1362	tags=19%, list=12%, signal=21%
GOBP_REGULATION_OF_MONOCYTE_CHEMOTAXIS	GOBP_REGULATION_OF_MONOCYTE_CHEMOTAXIS		19	0.539138	1.41036	0.107266	0.177888	1	803	tags=32%, list=7%, signal=34%
GOBP_POSITIVE_REGULATION_OF_TRANSFORMING_GROWTH_FACTOR_BETA_PRODUCTION	GOBP_POSITIVE_REGULATION_OF_TRANSFORMING_GROWTH_FACTOR_BETA_PRODUCTION		16	0.571446	1.41	0.102113	0.178253	1	404	tags=25%, list=3%, signal=26%
GSE14769_UNSTIM_VS_40MIN_LPS_BMDM_DN	GSE14769_UNSTIM_VS_40MIN_LPS_BMDM_DN		166	0.373028	1.40987	0.0169252	0.178338	1	1284	tags=21%, list=11%, signal=23%
GSE37301_MULTIPOTENT_PROGENITOR_VS_LYMPHOID_PRIMED_MPP_DN	GSE37301_MULTIPOTENT_PROGENITOR_VS_LYMPHOID_PRIMED_MPP_DN		160	0.373828	1.40979	0.0204082	0.178354	1	1689	tags=25%, list=14%, signal=29%
GSE43955_1H_VS_60H_ACT_CD4_TCELL_DN	GSE43955_1H_VS_60H_ACT_CD4_TCELL_DN		144	0.382754	1.40973	0.02	0.178359	1	2381	tags=29%, list=20%, signal=36%
GSE20715_0H_VS_48H_OZONE_LUNG_DN	GSE20715_0H_VS_48H_OZONE_LUNG_DN		163	0.37786	1.40973	0.0172414	0.178273	1	849	tags=13%, list=7%, signal=14%
GOCC_MEMBRANE_MICRODOMAIN	GOCC_MEMBRANE_MICRODOMAIN		242	0.359076	1.40972	0.0170604	0.178186	1	2038	tags=31%, list=17%, signal=36%
GSE41978_WT_VS_BIM_KO_KLRG1_LOW_EFFECTOR_CD8_TCELL_UP	GSE41978_WT_VS_BIM_KO_KLRG1_LOW_EFFECTOR_CD8_TCELL_UP		131	0.383713	1.40947	0.0297872	0.178417	1	2656	tags=34%, list=22%, signal=43%
HP_LIPOATROPHY	HP_LIPOATROPHY		47	0.453015	1.40945	0.0733229	0.17835	1	2304	tags=36%, list=20%, signal=45%
GSE16385_UNTREATED_VS_12H_ROSIGLITAZONE_IFNG_TNF_TREATED_MACROPHAGE_UP	GSE16385_UNTREATED_VS_12H_ROSIGLITAZONE_IFNG_TNF_TREATED_MACROPHAGE_UP		126	0.386215	1.40936	0.0321637	0.178368	1	1328	tags=21%, list=11%, signal=24%
GOMF_G_PROTEIN_COUPLED_RECEPTOR_BINDING	GOMF_G_PROTEIN_COUPLED_RECEPTOR_BINDING		153	0.380517	1.40925	0.0194444	0.17842	1	1639	tags=27%, list=14%, signal=31%
GSE19401_UNSTIM_VS_RETINOIC_ACID_STIM_FOLLICULAR_DC_DN	GSE19401_UNSTIM_VS_RETINOIC_ACID_STIM_FOLLICULAR_DC_DN		147	0.376598	1.40921	0.0301291	0.178379	1	1568	tags=19%, list=13%, signal=22%
GSE11961_FOLLICULAR_BCELL_VS_MARGINAL_ZONE_BCELL_DN	GSE11961_FOLLICULAR_BCELL_VS_MARGINAL_ZONE_BCELL_DN		126	0.387403	1.40896	0.0255682	0.178612	1	2206	tags=34%, list=19%, signal=42%
GOBP_REGULATION_OF_MUSCLE_CELL_DIFFERENTIATION	GOBP_REGULATION_OF_MUSCLE_CELL_DIFFERENTIATION		95	0.405813	1.40882	0.0212443	0.178695	1	1164	tags=22%, list=10%, signal=24%
HP_ABNORMAL_CRY	HP_ABNORMAL_CRY		33	0.482543	1.40881	0.0713101	0.178615	1	1253	tags=24%, list=11%, signal=27%
GOBP_STRIATED_MUSCLE_CELL_DEVELOPMENT	GOBP_STRIATED_MUSCLE_CELL_DEVELOPMENT		68	0.424531	1.40862	0.061747	0.178766	1	861	tags=16%, list=7%, signal=17%
GSE22589_HEALTHY_VS_SIV_INFECTED_DC_UP	GSE22589_HEALTHY_VS_SIV_INFECTED_DC_UP		168	0.374668	1.40856	0.0262431	0.178755	1	2921	tags=36%, list=25%, signal=48%
GOBP_CELLULAR_RESPONSE_TO_LIPID	GOBP_CELLULAR_RESPONSE_TO_LIPID		397	0.34076	1.40844	0.00252207	0.178819	1	1973	tags=23%, list=17%, signal=27%
GSE1112_OT1_CD8AB_VS_HY_CD8AA_THYMOCYTE_RTOC_CULTURE_UP	GSE1112_OT1_CD8AB_VS_HY_CD8AA_THYMOCYTE_RTOC_CULTURE_UP		87	0.403102	1.40832	0.0474777	0.178881	1	2245	tags=33%, list=19%, signal=41%
GOBP_CYCLIC_NUCLEOTIDE_METABOLIC_PROCESS	GOBP_CYCLIC_NUCLEOTIDE_METABOLIC_PROCESS		28	0.501842	1.40828	0.0863192	0.178852	1	3001	tags=50%, list=25%, signal=67%
GSE41978_ID2_KO_AND_BIM_KO_VS_BIM_KO_KLRG1_LOW_EFFECTOR_CD8_TCELL_UP	GSE41978_ID2_KO_AND_BIM_KO_VS_BIM_KO_KLRG1_LOW_EFFECTOR_CD8_TCELL_UP		137	0.387901	1.40818	0.029872	0.178898	1	2099	tags=27%, list=18%, signal=32%
GSE17974_IL4_AND_ANTI_IL12_VS_UNTREATED_0.5H_ACT_CD4_TCELL_DN	GSE17974_IL4_AND_ANTI_IL12_VS_UNTREATED_0.5H_ACT_CD4_TCELL_DN		75	0.40947	1.40812	0.0569231	0.178878	1	2517	tags=43%, list=21%, signal=54%
HP_HYPEROSTOSIS	HP_HYPEROSTOSIS		48	0.45497	1.4081	0.0782209	0.178808	1	1689	tags=25%, list=14%, signal=29%
GOBP_POSITIVE_REGULATION_OF_BLOOD_CIRCULATION	GOBP_POSITIVE_REGULATION_OF_BLOOD_CIRCULATION		23	0.519772	1.40801	0.0824916	0.178841	1	1006	tags=39%, list=9%, signal=43%
HP_CELLULITIS	HP_CELLULITIS		36	0.471959	1.40768	0.0838608	0.179163	1	2186	tags=36%, list=19%, signal=44%
KEGG_CALCIUM_SIGNALING_PATHWAY	KEGG_CALCIUM_SIGNALING_PATHWAY		110	0.396684	1.40754	0.0327869	0.179264	1	1331	tags=21%, list=11%, signal=23%
GSE41176_WT_VS_TAK1_KO_ANTI_IGM_STIM_BCELL_24H_UP	GSE41176_WT_VS_TAK1_KO_ANTI_IGM_STIM_BCELL_24H_UP		178	0.369	1.40734	0.0257104	0.179427	1	2320	tags=24%, list=20%, signal=29%
GOCC_CELL_PROJECTION_MEMBRANE	GOCC_CELL_PROJECTION_MEMBRANE		230	0.358314	1.40694	0.0255376	0.179858	1	2391	tags=31%, list=20%, signal=38%
GSE30971_WBP7_HET_VS_KO_MACROPHAGE_DN	GSE30971_WBP7_HET_VS_KO_MACROPHAGE_DN		146	0.379254	1.40691	0.01983	0.179802	1	1835	tags=24%, list=16%, signal=28%
GOBP_POSITIVE_REGULATION_OF_OSTEOCLAST_DIFFERENTIATION	GOBP_POSITIVE_REGULATION_OF_OSTEOCLAST_DIFFERENTIATION		19	0.542873	1.40688	0.0927835	0.179759	1	1689	tags=32%, list=14%, signal=37%
HP_SEVERE_SHORT_STATURE	HP_SEVERE_SHORT_STATURE		76	0.410021	1.40641	0.0582822	0.180292	1	1612	tags=20%, list=14%, signal=23%
GOBP_NEGATIVE_REGULATION_OF_SMOOTHENED_SIGNALING_PATHWAY	GOBP_NEGATIVE_REGULATION_OF_SMOOTHENED_SIGNALING_PATHWAY		26	0.51437	1.40633	0.0894737	0.180317	1	1828	tags=35%, list=15%, signal=41%
GSE40274_FOXP3_VS_FOXP3_AND_SATB1_TRANSDUCED_ACTIVATED_CD4_TCELL_UP	GSE40274_FOXP3_VS_FOXP3_AND_SATB1_TRANSDUCED_ACTIVATED_CD4_TCELL_UP		72	0.420502	1.40537	0.0544118	0.18149	1	1250	tags=28%, list=11%, signal=31%
HP_ABNORMAL_SYSTEMIC_BLOOD_PRESSURE	HP_ABNORMAL_SYSTEMIC_BLOOD_PRESSURE		313	0.352256	1.40517	0.00766283	0.18167	1	1618	tags=21%, list=14%, signal=24%
GOBP_REGULATION_OF_AXONOGENESIS	GOBP_REGULATION_OF_AXONOGENESIS		118	0.388947	1.40479	0.0395315	0.18209	1	1828	tags=27%, list=15%, signal=32%
GSE37605_NOD_VS_C57BL6_IRES_GFP_TREG_UP	GSE37605_NOD_VS_C57BL6_IRES_GFP_TREG_UP		125	0.389301	1.4047	0.0278592	0.182108	1	2378	tags=34%, list=20%, signal=42%
GSE37534_GW1929_VS_PIOGLITAZONE_TREATED_CD4_TCELL_PPARG1_FOXP3_TRANSDUCED_UP	GSE37534_GW1929_VS_PIOGLITAZONE_TREATED_CD4_TCELL_PPARG1_FOXP3_TRANSDUCED_UP		120	0.390788	1.40412	0.0434132	0.182783	1	2660	tags=33%, list=23%, signal=42%
GOBP_INTERLEUKIN_6_PRODUCTION	GOBP_INTERLEUKIN_6_PRODUCTION		95	0.401858	1.40408	0.0346386	0.182737	1	2017	tags=25%, list=17%, signal=30%
GOBP_POSITIVE_REGULATION_OF_NEUTROPHIL_MIGRATION	GOBP_POSITIVE_REGULATION_OF_NEUTROPHIL_MIGRATION		25	0.510392	1.40405	0.0824742	0.182678	1	1614	tags=32%, list=14%, signal=37%
GSE43863_NAIVE_VS_LY6C_LOW_CXCR5NEG_CD4_EFF_TCELL_D6_LCMV_DN	GSE43863_NAIVE_VS_LY6C_LOW_CXCR5NEG_CD4_EFF_TCELL_D6_LCMV_DN		149	0.374359	1.40404	0.0281294	0.182601	1	2479	tags=32%, list=21%, signal=40%
HP_PREAXIAL_HAND_POLYDACTYLY	HP_PREAXIAL_HAND_POLYDACTYLY		39	0.474038	1.40393	0.0690846	0.182651	1	3214	tags=46%, list=27%, signal=63%
GSE17721_CTRL_VS_PAM3CSK4_4H_BMDC_DN	GSE17721_CTRL_VS_PAM3CSK4_4H_BMDC_DN		147	0.374443	1.40389	0.0265734	0.182618	1	1592	tags=17%, list=13%, signal=19%
GSE41867_NAIVE_VS_DAY15_LCMV_CONE13_EFFECTOR_CD8_TCELL_UP	GSE41867_NAIVE_VS_DAY15_LCMV_CONE13_EFFECTOR_CD8_TCELL_UP		65	0.423559	1.40385	0.056231	0.182568	1	891	tags=26%, list=8%, signal=28%
HP_MENINGOCELE	HP_MENINGOCELE		38	0.464895	1.40352	0.0673401	0.182908	1	1700	tags=29%, list=14%, signal=34%
[truncated: 5,786 more rows]

## Sheet: neg
Negatively enriched pathways in MYC mutated samples compared to wild-type.
NAME	GS<br> follow link to MSigDB	GS DETAILS	SIZE	ES	NES	NOM p-val	FDR q-val	FWER p-val	RANK AT MAX	LEADING EDGE
KEGG_RIBOSOME	KEGG_RIBOSOME	Details ...	40	-0.711966	-2.28793	0	0.0143755	0.013	1477	tags=63%, list=13%, signal=71%
GOCC_CYTOSOLIC_RIBOSOME	GOCC_CYTOSOLIC_RIBOSOME	Details ...	52	-0.639433	-2.229	0	0.0265521	0.048	1477	tags=54%, list=13%, signal=61%
GOCC_CYTOSOLIC_LARGE_RIBOSOMAL_SUBUNIT	GOCC_CYTOSOLIC_LARGE_RIBOSOMAL_SUBUNIT	Details ...	28	-0.73572	-2.21022	0	0.0232447	0.06	1477	tags=64%, list=13%, signal=73%
GOBP_NUCLEAR_TRANSCRIBED_MRNA_CATABOLIC_PROCESS_NONSENSE_MEDIATED_DECAY	GOBP_NUCLEAR_TRANSCRIBED_MRNA_CATABOLIC_PROCESS_NONSENSE_MEDIATED_DECAY	Details ...	71	-0.595571	-2.13567	0	0.0626755	0.2	1656	tags=41%, list=14%, signal=47%
GOBP_COTRANSLATIONAL_PROTEIN_TARGETING_TO_MEMBRANE	GOBP_COTRANSLATIONAL_PROTEIN_TARGETING_TO_MEMBRANE	Details ...	52	-0.625202	-2.10729	0	0.0821803	0.31	1477	tags=46%, list=13%, signal=53%
GSE44649_NAIVE_VS_ACTIVATED_CD8_TCELL_MIR155_KO_DN	GSE44649_NAIVE_VS_ACTIVATED_CD8_TCELL_MIR155_KO_DN	Details ...	182	-0.49518	-2.08637	0	0.0956728	0.405	3752	tags=63%, list=32%, signal=91%
GOBP_ESTABLISHMENT_OF_PROTEIN_LOCALIZATION_TO_ENDOPLASMIC_RETICULUM	GOBP_ESTABLISHMENT_OF_PROTEIN_LOCALIZATION_TO_ENDOPLASMIC_RETICULUM	Details ...	65	-0.565921	-2.01202	0	0.225266	0.758	1477	tags=42%, list=13%, signal=47%
HP_ABSENT_THUMB	HP_ABSENT_THUMB	Details ...	29	-0.675232	-2.00764	0	0.206502	0.778	1663	tags=52%, list=14%, signal=60%
HOWARD_NK_CELL_INACT_MONOV_INFLUENZA_A_INDONESIA_05_2005_H5N1_AGE_18_49YO_3DY_UP	HOWARD_NK_CELL_INACT_MONOV_INFLUENZA_A_INDONESIA_05_2005_H5N1_AGE_18_49YO_3DY_UP	Details ...	63	-0.543975	-1.98008	0	0.258965	0.88	4127	tags=76%, list=35%, signal=116%
HP_ERYTHROID_HYPOPLASIA	HP_ERYTHROID_HYPOPLASIA	Details ...	15	-0.764385	-1.97041	0.00471698	0.264076	0.902	1309	tags=60%, list=11%, signal=67%
GOBP_TRANSLATIONAL_INITIATION	GOBP_TRANSLATIONAL_INITIATION	Details ...	126	-0.487118	-1.94643	0	0.318156	0.949	3352	tags=55%, list=28%, signal=76%
THAKAR_PBMC_INACTIVATED_INFLUENZA_AGE_21_30YO_NONRESPONDER_28DY_UP	THAKAR_PBMC_INACTIVATED_INFLUENZA_AGE_21_30YO_NONRESPONDER_28DY_UP	Details ...	151	-0.470452	-1.92794	0	0.358068	0.974	3631	tags=57%, list=31%, signal=81%
HP_ABNORMAL_NUMBER_OF_ERYTHROID_PRECURSORS	HP_ABNORMAL_NUMBER_OF_ERYTHROID_PRECURSORS	Details ...	23	-0.669527	-1.92593	0	0.339265	0.98	1411	tags=48%, list=12%, signal=54%
GOMF_LIGAND_GATED_CATION_CHANNEL_ACTIVITY	GOMF_LIGAND_GATED_CATION_CHANNEL_ACTIVITY	Details ...	50	-0.559667	-1.9132	0	0.365237	0.991	559	tags=20%, list=5%, signal=21%
HP_RETICULOCYTOPENIA	HP_RETICULOCYTOPENIA	Details ...	23	-0.645241	-1.88811	0.00722892	0.444261	0.998	1770	tags=52%, list=15%, signal=61%
GSE23502_BM_VS_COLON_TUMOR_MYELOID_DERIVED_SUPPRESSOR_CELL_DN	GSE23502_BM_VS_COLON_TUMOR_MYELOID_DERIVED_SUPPRESSOR_CELL_DN	Details ...	174	-0.457675	-1.88533	0	0.427675	0.998	2105	tags=40%, list=18%, signal=48%
HP_DUODENAL_STENOSIS	HP_DUODENAL_STENOSIS	Details ...	26	-0.637362	-1.87436	0.00492611	0.451144	0.999	1868	tags=50%, list=16%, signal=59%
GOCC_RIBOSOMAL_SUBUNIT	GOCC_RIBOSOMAL_SUBUNIT	Details ...	116	-0.474799	-1.87162	0	0.436802	0.999	3572	tags=53%, list=30%, signal=75%
GOBP_CYTOPLASMIC_TRANSLATION	GOBP_CYTOPLASMIC_TRANSLATION	Details ...	72	-0.503868	-1.86401	0	0.448605	0.999	3352	tags=53%, list=28%, signal=73%
GOBP_RIBONUCLEOPROTEIN_COMPLEX_SUBUNIT_ORGANIZATION	GOBP_RIBONUCLEOPROTEIN_COMPLEX_SUBUNIT_ORGANIZATION	Details ...	155	-0.44344	-1.8639	0	0.42656	0.999	4308	tags=59%, list=36%, signal=91%
GOBP_RAB_PROTEIN_SIGNAL_TRANSDUCTION	GOBP_RAB_PROTEIN_SIGNAL_TRANSDUCTION		16	-0.705381	-1.86199	0.00456621	0.413937	0.999	674	tags=38%, list=6%, signal=40%
GSE15750_DAY6_VS_DAY10_TRAF6KO_EFF_CD8_TCELL_UP	GSE15750_DAY6_VS_DAY10_TRAF6KO_EFF_CD8_TCELL_UP		176	-0.449732	-1.85916	0	0.40661	0.999	3523	tags=57%, list=30%, signal=81%
GOMF_DNA_SECONDARY_STRUCTURE_BINDING	GOMF_DNA_SECONDARY_STRUCTURE_BINDING		29	-0.607683	-1.85828	0.0078534	0.392728	0.999	1032	tags=45%, list=9%, signal=49%
GOMF_STRUCTURAL_CONSTITUENT_OF_RIBOSOME	GOMF_STRUCTURAL_CONSTITUENT_OF_RIBOSOME		94	-0.487465	-1.85772	0	0.3782	0.999	3572	tags=51%, list=30%, signal=73%
GOBP_DRUG_METABOLIC_PROCESS	GOBP_DRUG_METABOLIC_PROCESS		15	-0.737226	-1.85015	0.00493827	0.390398	0.999	1393	tags=47%, list=12%, signal=53%
KRAS.PROSTATE_UP.V1_UP	KRAS.PROSTATE_UP.V1_UP		72	-0.514851	-1.8497	0.00289855	0.377592	1	217	tags=14%, list=2%, signal=14%
GSE25085_FETAL_LIVER_VS_ADULT_BM_SP4_THYMIC_IMPLANT_DN	GSE25085_FETAL_LIVER_VS_ADULT_BM_SP4_THYMIC_IMPLANT_DN		175	-0.443881	-1.84729	0	0.371462	1	3323	tags=54%, list=28%, signal=74%
GOCC_LARGE_RIBOSOMAL_SUBUNIT	GOCC_LARGE_RIBOSOMAL_SUBUNIT		74	-0.504709	-1.84591	0	0.363036	1	3349	tags=53%, list=28%, signal=73%
GOBP_VIRAL_GENE_EXPRESSION	GOBP_VIRAL_GENE_EXPRESSION		139	-0.457508	-1.83849	0	0.377677	1	3259	tags=49%, list=28%, signal=67%
GOBP_MITOTIC_SISTER_CHROMATID_SEGREGATION	GOBP_MITOTIC_SISTER_CHROMATID_SEGREGATION		137	-0.453288	-1.83741	0	0.368988	1	4628	tags=64%, list=39%, signal=103%
HALLMARK_E2F_TARGETS	HALLMARK_E2F_TARGETS		178	-0.437203	-1.83704	0	0.358545	1	4172	tags=58%, list=35%, signal=89%
THAKAR_PBMC_INACTIVATED_INFLUENZA_AGE_21_30YO_NONRESPONDER_7DY_UP	THAKAR_PBMC_INACTIVATED_INFLUENZA_AGE_21_30YO_NONRESPONDER_7DY_UP		117	-0.466096	-1.83562	0	0.351377	1	5032	tags=77%, list=43%, signal=133%
GOBP_RECOMBINATIONAL_REPAIR	GOBP_RECOMBINATIONAL_REPAIR		123	-0.456475	-1.83039	0	0.359334	1	3502	tags=49%, list=30%, signal=69%
GOBP_DNA_DEPENDENT_DNA_REPLICATION_MAINTENANCE_OF_FIDELITY	GOBP_DNA_DEPENDENT_DNA_REPLICATION_MAINTENANCE_OF_FIDELITY		41	-0.561648	-1.82973	0	0.351161	1	2227	tags=54%, list=19%, signal=66%
HP_YOUNG_ADULT_ONSET	HP_YOUNG_ADULT_ONSET		19	-0.668661	-1.82768	0.00963855	0.347373	1	270	tags=16%, list=2%, signal=16%
HP_MALIGNANT_GENITOURINARY_TRACT_TUMOR	HP_MALIGNANT_GENITOURINARY_TRACT_TUMOR		16	-0.710241	-1.82624	0.00689655	0.342569	1	1309	tags=56%, list=11%, signal=63%
GOBP_PROTEIN_LOCALIZATION_TO_ENDOPLASMIC_RETICULUM	GOBP_PROTEIN_LOCALIZATION_TO_ENDOPLASMIC_RETICULUM		87	-0.487635	-1.82235	0	0.345102	1	1309	tags=32%, list=11%, signal=36%
HP_ABNORMAL_SHAPE_OF_THE_PALPEBRAL_FISSURE	HP_ABNORMAL_SHAPE_OF_THE_PALPEBRAL_FISSURE		35	-0.584052	-1.81854	0	0.348724	1	1966	tags=46%, list=17%, signal=55%
HP_BILATERAL_MICROPHTHALMOS	HP_BILATERAL_MICROPHTHALMOS		16	-0.692058	-1.81656	0.0166271	0.345462	1	300	tags=19%, list=3%, signal=19%
GOMF_EXTRACELLULAR_LIGAND_GATED_ION_CHANNEL_ACTIVITY	GOMF_EXTRACELLULAR_LIGAND_GATED_ION_CHANNEL_ACTIVITY		20	-0.656823	-1.81349	0.00235294	0.34659	1	559	tags=30%, list=5%, signal=31%
HP_PERSISTENCE_OF_HEMOGLOBIN_F	HP_PERSISTENCE_OF_HEMOGLOBIN_F		17	-0.670269	-1.81241	0.0117925	0.341262	1	2195	tags=65%, list=19%, signal=79%
GOBP_AXONEME_ASSEMBLY	GOBP_AXONEME_ASSEMBLY		39	-0.570664	-1.81217	0.00254453	0.333845	1	585	tags=28%, list=5%, signal=30%
GOCC_NEUROTRANSMITTER_RECEPTOR_COMPLEX	GOCC_NEUROTRANSMITTER_RECEPTOR_COMPLEX		19	-0.657627	-1.81179	0.00966184	0.326747	1	326	tags=21%, list=3%, signal=22%
KEGG_RNA_DEGRADATION	KEGG_RNA_DEGRADATION		51	-0.526812	-1.81149	0.00261097	0.319951	1	3295	tags=57%, list=28%, signal=79%
HALLMARK_G2M_CHECKPOINT	HALLMARK_G2M_CHECKPOINT		181	-0.431356	-1.81097	0	0.314263	1	4207	tags=62%, list=36%, signal=95%
HP_ABSENT_TESTIS	HP_ABSENT_TESTIS		23	-0.631806	-1.81089	0.00488998	0.307624	1	1868	tags=52%, list=16%, signal=62%
HP_PYRIDOXINE_RESPONSIVE_SIDEROBLASTIC_ANEMIA	HP_PYRIDOXINE_RESPONSIVE_SIDEROBLASTIC_ANEMIA		22	-0.636685	-1.8062	0.00966184	0.312947	1	1868	tags=55%, list=16%, signal=65%
GSE27241_WT_VS_RORGT_KO_TH17_POLARIZED_CD4_TCELL_TREATED_WITH_DIGOXIN_UP	GSE27241_WT_VS_RORGT_KO_TH17_POLARIZED_CD4_TCELL_TREATED_WITH_DIGOXIN_UP		160	-0.438266	-1.8039	0	0.312542	1	3354	tags=40%, list=28%, signal=55%
GOMF_TRANSMITTER_GATED_CHANNEL_ACTIVITY	GOMF_TRANSMITTER_GATED_CHANNEL_ACTIVITY		15	-0.699047	-1.79827	0.00928074	0.320975	1	326	tags=33%, list=3%, signal=34%
GOMF_NUCLEOBASE_CONTAINING_COMPOUND_KINASE_ACTIVITY	GOMF_NUCLEOBASE_CONTAINING_COMPOUND_KINASE_ACTIVITY		28	-0.59863	-1.79692	0.00755667	0.317894	1	2259	tags=43%, list=19%, signal=53%
GOBP_ORGANIC_CATION_TRANSPORT	GOBP_ORGANIC_CATION_TRANSPORT		18	-0.661566	-1.79364	0.00740741	0.321136	1	1618	tags=56%, list=14%, signal=64%
GSE2405_0H_VS_9H_A_PHAGOCYTOPHILUM_STIM_NEUTROPHIL_DN	GSE2405_0H_VS_9H_A_PHAGOCYTOPHILUM_STIM_NEUTROPHIL_DN		130	-0.444299	-1.79321	0	0.31617	1	3085	tags=46%, list=26%, signal=62%
HP_ABNORMAL_ERYTHROCYTE_ENZYME_LEVEL	HP_ABNORMAL_ERYTHROCYTE_ENZYME_LEVEL		16	-0.682172	-1.79174	0.00705882	0.314419	1	1309	tags=50%, list=11%, signal=56%
GSE37532_TREG_VS_TCONV_CD4_TCELL_FROM_VISCERAL_ADIPOSE_TISSUE_DN	GSE37532_TREG_VS_TCONV_CD4_TCELL_FROM_VISCERAL_ADIPOSE_TISSUE_DN		138	-0.43541	-1.79065	0	0.311339	1	2527	tags=41%, list=21%, signal=52%
GSE15750_DAY6_VS_DAY10_EFF_CD8_TCELL_UP	GSE15750_DAY6_VS_DAY10_EFF_CD8_TCELL_UP		179	-0.429752	-1.78954	0	0.308691	1	2900	tags=49%, list=25%, signal=63%
GSE13547_CTRL_VS_ANTI_IGM_STIM_BCELL_12H_UP	GSE13547_CTRL_VS_ANTI_IGM_STIM_BCELL_12H_UP		154	-0.433656	-1.78789	0	0.30732	1	2899	tags=47%, list=25%, signal=61%
GSE10239_MEMORY_VS_DAY4.5_EFF_CD8_TCELL_DN	GSE10239_MEMORY_VS_DAY4.5_EFF_CD8_TCELL_DN		178	-0.427822	-1.78766	0	0.302608	1	4471	tags=62%, list=38%, signal=99%
GSE39556_CD8A_DC_VS_NK_CELL_MOUSE_3H_POST_POLYIC_INJ_UP	GSE39556_CD8A_DC_VS_NK_CELL_MOUSE_3H_POST_POLYIC_INJ_UP		166	-0.42516	-1.78689	0	0.299315	1	3141	tags=48%, list=27%, signal=65%
GOCC_RIBOSOME	GOCC_RIBOSOME		146	-0.430124	-1.78578	0	0.296398	1	3572	tags=51%, list=30%, signal=73%
GOBP_PROTEIN_TARGETING_TO_MEMBRANE	GOBP_PROTEIN_TARGETING_TO_MEMBRANE		123	-0.44649	-1.78193	0	0.301662	1	1477	tags=29%, list=13%, signal=33%
GOBP_RIBOSOMAL_LARGE_SUBUNIT_ASSEMBLY	GOBP_RIBOSOMAL_LARGE_SUBUNIT_ASSEMBLY		18	-0.650798	-1.77673	0.00731707	0.31028	1	992	tags=39%, list=8%, signal=42%
HP_ABNORMALITY_OF_THE_PREPUTIUM	HP_ABNORMALITY_OF_THE_PREPUTIUM		29	-0.594281	-1.77563	0.0049505	0.308124	1	1868	tags=45%, list=16%, signal=53%
HALLMARK_MYC_TARGETS_V1	HALLMARK_MYC_TARGETS_V1		168	-0.421724	-1.77092	0	0.314965	1	4749	tags=62%, list=40%, signal=102%
GOBP_DNA_SYNTHESIS_INVOLVED_IN_DNA_REPAIR	GOBP_DNA_SYNTHESIS_INVOLVED_IN_DNA_REPAIR		39	-0.545862	-1.76884	0.00515464	0.315884	1	2581	tags=51%, list=22%, signal=65%
NAKAYA_PBMC_FLUARIX_FLUVIRIN_AGE_18_50YO_CORRELATED_WITH_HAI_28DY_RESPONSE_AT_3DY_NEGATIVE	NAKAYA_PBMC_FLUARIX_FLUVIRIN_AGE_18_50YO_CORRELATED_WITH_HAI_28DY_RESPONSE_AT_3DY_NEGATIVE		299	-0.394185	-1.76741	0	0.314793	1	3219	tags=47%, list=27%, signal=63%
GOBP_ATTACHMENT_OF_SPINDLE_MICROTUBULES_TO_KINETOCHORE	GOBP_ATTACHMENT_OF_SPINDLE_MICROTUBULES_TO_KINETOCHORE		28	-0.5757	-1.76659	0.00753769	0.312129	1	4181	tags=75%, list=35%, signal=116%
GOCC_CUL4_RING_E3_UBIQUITIN_LIGASE_COMPLEX	GOCC_CUL4_RING_E3_UBIQUITIN_LIGASE_COMPLEX		27	-0.57937	-1.76525	0.0182292	0.311099	1	4299	tags=74%, list=36%, signal=116%
GOBP_PHOSPHATIDYLETHANOLAMINE_METABOLIC_PROCESS	GOBP_PHOSPHATIDYLETHANOLAMINE_METABOLIC_PROCESS		24	-0.604418	-1.76521	0.0025974	0.306572	1	1799	tags=33%, list=15%, signal=39%
GSE18893_TCONV_VS_TREG_24H_TNF_STIM_UP	GSE18893_TCONV_VS_TREG_24H_TNF_STIM_UP		166	-0.425996	-1.76447	0	0.303857	1	4080	tags=51%, list=35%, signal=76%
HP_ABNORMAL_FALLOPIAN_TUBE_MORPHOLOGY	HP_ABNORMAL_FALLOPIAN_TUBE_MORPHOLOGY		16	-0.66353	-1.76352	0.00883002	0.302071	1	3235	tags=81%, list=27%, signal=112%
GSE21380_NON_TFH_VS_GERMINAL_CENTER_TFH_CD4_TCELL_DN	GSE21380_NON_TFH_VS_GERMINAL_CENTER_TFH_CD4_TCELL_DN		170	-0.424112	-1.76167	0	0.302576	1	3934	tags=59%, list=33%, signal=87%
HP_MYELODYSPLASIA	HP_MYELODYSPLASIA		77	-0.477232	-1.76084	0	0.300902	1	2148	tags=43%, list=18%, signal=52%
GOBP_NADP_METABOLIC_PROCESS	GOBP_NADP_METABOLIC_PROCESS		29	-0.58218	-1.75764	0.0115741	0.304107	1	1459	tags=34%, list=12%, signal=39%
GOBP_NUCLEAR_TRANSCRIBED_MRNA_CATABOLIC_PROCESS	GOBP_NUCLEAR_TRANSCRIBED_MRNA_CATABOLIC_PROCESS		148	-0.422462	-1.75362	0	0.310203	1	3349	tags=47%, list=28%, signal=65%
GOMF_HISTONE_KINASE_ACTIVITY	GOMF_HISTONE_KINASE_ACTIVITY		15	-0.671123	-1.75245	0.0178571	0.308949	1	3339	tags=87%, list=28%, signal=121%
CAHOY_NEURONAL	CAHOY_NEURONAL		36	-0.560672	-1.75123	0.0151515	0.307807	1	768	tags=42%, list=7%, signal=44%
HP_PRODUCTIVE_COUGH	HP_PRODUCTIVE_COUGH		34	-0.551776	-1.75083	0.0130548	0.304813	1	585	tags=24%, list=5%, signal=25%
GSE10239_NAIVE_VS_MEMORY_CD8_TCELL_UP	GSE10239_NAIVE_VS_MEMORY_CD8_TCELL_UP		173	-0.414408	-1.74734	0	0.310302	1	3247	tags=46%, list=27%, signal=63%
GOBP_REPLICATION_FORK_PROCESSING	GOBP_REPLICATION_FORK_PROCESSING		34	-0.562821	-1.74728	0.00486618	0.306653	1	2227	tags=53%, list=19%, signal=65%
GOMF_MHC_PROTEIN_COMPLEX_BINDING	GOMF_MHC_PROTEIN_COMPLEX_BINDING		16	-0.67647	-1.74718	0.0153846	0.303054	1	2037	tags=56%, list=17%, signal=68%
GOMF_LIGAND_GATED_ION_CHANNEL_ACTIVITY	GOMF_LIGAND_GATED_ION_CHANNEL_ACTIVITY		53	-0.488446	-1.74498	0.0026455	0.304427	1	559	tags=19%, list=5%, signal=20%
GSE37532_WT_VS_PPARG_KO_VISCERAL_ADIPOSE_TISSUE_TREG_UP	GSE37532_WT_VS_PPARG_KO_VISCERAL_ADIPOSE_TISSUE_TREG_UP		168	-0.417055	-1.74259	0	0.306561	1	3523	tags=48%, list=30%, signal=68%
GOBP_CYTOPLASMIC_TRANSLATIONAL_INITIATION	GOBP_CYTOPLASMIC_TRANSLATIONAL_INITIATION		29	-0.567823	-1.74046	0.0152672	0.308307	1	4605	tags=79%, list=39%, signal=130%
THAKAR_PBMC_INACTIVATED_INFLUENZA_AGE_70PLS_NONRESPONDER_2DY_UP	THAKAR_PBMC_INACTIVATED_INFLUENZA_AGE_70PLS_NONRESPONDER_2DY_UP		96	-0.455848	-1.7386	0	0.309249	1	3962	tags=58%, list=34%, signal=87%
GOCC_INTRINSIC_COMPONENT_OF_PRESYNAPTIC_MEMBRANE	GOCC_INTRINSIC_COMPONENT_OF_PRESYNAPTIC_MEMBRANE		31	-0.560388	-1.73362	0.00512821	0.318453	1	559	tags=19%, list=5%, signal=20%
KEGG_METABOLISM_OF_XENOBIOTICS_BY_CYTOCHROME_P450	KEGG_METABOLISM_OF_XENOBIOTICS_BY_CYTOCHROME_P450		15	-0.655369	-1.73176	0.0211765	0.320005	1	8	tags=7%, list=0%, signal=7%
HP_SIDEROBLASTIC_ANEMIA	HP_SIDEROBLASTIC_ANEMIA		32	-0.553827	-1.72762	0.0175439	0.32729	1	1868	tags=47%, list=16%, signal=56%
GOBP_TRNA_TRANSPORT	GOBP_TRNA_TRANSPORT		29	-0.568586	-1.72629	0.0167464	0.326905	1	4479	tags=76%, list=38%, signal=122%
GOBP_GUANOSINE_CONTAINING_COMPOUND_METABOLIC_PROCESS	GOBP_GUANOSINE_CONTAINING_COMPOUND_METABOLIC_PROCESS		27	-0.590771	-1.72535	0.0214797	0.325663	1	1494	tags=33%, list=13%, signal=38%
GOCC_SITE_OF_DOUBLE_STRAND_BREAK	GOCC_SITE_OF_DOUBLE_STRAND_BREAK		57	-0.480543	-1.72171	0.00847458	0.331628	1	2136	tags=49%, list=18%, signal=60%
HP_OSTEOSARCOMA	HP_OSTEOSARCOMA		19	-0.627831	-1.72063	0.019656	0.330857	1	1411	tags=58%, list=12%, signal=66%
HP_NORMOCHROMIC_ANEMIA	HP_NORMOCHROMIC_ANEMIA		19	-0.635957	-1.71674	0.027907	0.33711	1	1779	tags=53%, list=15%, signal=62%
GOBP_DNA_CONFORMATION_CHANGE	GOBP_DNA_CONFORMATION_CHANGE		226	-0.396675	-1.71659	0	0.333793	1	3653	tags=48%, list=31%, signal=68%
GSE10239_MEMORY_VS_KLRG1HIGH_EFF_CD8_TCELL_DN	GSE10239_MEMORY_VS_KLRG1HIGH_EFF_CD8_TCELL_DN		171	-0.406832	-1.71565	0	0.332801	1	3376	tags=46%, list=29%, signal=64%
HP_ABNORMAL_HEMOGLOBIN	HP_ABNORMAL_HEMOGLOBIN		28	-0.568258	-1.71318	0.0148148	0.335634	1	1309	tags=39%, list=11%, signal=44%
GOMF_TRANSLATION_INITIATION_FACTOR_ACTIVITY	GOMF_TRANSLATION_INITIATION_FACTOR_ACTIVITY		42	-0.520873	-1.70979	0.00787402	0.340603	1	5068	tags=83%, list=43%, signal=145%
GOBP_CHROMOSOME_SEPARATION	GOBP_CHROMOSOME_SEPARATION		77	-0.472384	-1.70879	0	0.339425	1	4987	tags=75%, list=42%, signal=130%
GOBP_TRIGLYCERIDE_CATABOLIC_PROCESS	GOBP_TRIGLYCERIDE_CATABOLIC_PROCESS		21	-0.612617	-1.70762	0.0207852	0.339226	1	184	tags=10%, list=2%, signal=10%
HP_BICORNUATE_UTERUS	HP_BICORNUATE_UTERUS		38	-0.529683	-1.70439	0.0192837	0.344327	1	1868	tags=45%, list=16%, signal=53%
GOCC_CATION_CHANNEL_COMPLEX	GOCC_CATION_CHANNEL_COMPLEX		97	-0.441486	-1.70418	0.00276243	0.341414	1	519	tags=14%, list=4%, signal=15%
GOCC_CHROMOSOME_CENTROMERIC_REGION	GOCC_CHROMOSOME_CENTROMERIC_REGION		172	-0.407052	-1.70372	0	0.339226	1	4207	tags=60%, list=36%, signal=93%
GSE37532_VISCERAL_ADIPOSE_TISSUE_VS_LN_DERIVED_PPARG_KO_TCONV_CD4_TCELL_UP	GSE37532_VISCERAL_ADIPOSE_TISSUE_VS_LN_DERIVED_PPARG_KO_TCONV_CD4_TCELL_UP		141	-0.423902	-1.70169	0	0.340766	1	3116	tags=45%, list=26%, signal=61%
GOCC_SITE_OF_DNA_DAMAGE	GOCC_SITE_OF_DNA_DAMAGE		76	-0.460829	-1.7016	0.0110497	0.337747	1	2227	tags=46%, list=19%, signal=56%
GSE14000_TRANSLATED_RNA_VS_MRNA_4H_LPS_DC_UP	GSE14000_TRANSLATED_RNA_VS_MRNA_4H_LPS_DC_UP		171	-0.405806	-1.69664	0	0.347316	1	4708	tags=62%, list=40%, signal=102%
GSE40493_BCL6_KO_VS_WT_TREG_DN	GSE40493_BCL6_KO_VS_WT_TREG_DN		37	-0.528123	-1.69433	0.0148515	0.349876	1	907	tags=30%, list=8%, signal=32%
GOBP_POSTREPLICATION_REPAIR	GOBP_POSTREPLICATION_REPAIR		43	-0.512447	-1.69256	0.0025641	0.351354	1	2581	tags=44%, list=22%, signal=56%
HP_ASTROCYTOMA	HP_ASTROCYTOMA		19	-0.621199	-1.69034	0.0229885	0.354352	1	2188	tags=53%, list=19%, signal=64%
GOMF_SINGLE_STRANDED_DNA_BINDING	GOMF_SINGLE_STRANDED_DNA_BINDING		95	-0.442231	-1.68201	0.00282486	0.373561	1	3319	tags=49%, list=28%, signal=68%
GSE32533_WT_VS_MIR17_KO_ACT_CD4_TCELL_DN	GSE32533_WT_VS_MIR17_KO_ACT_CD4_TCELL_DN		174	-0.400595	-1.68159	0	0.371402	1	4290	tags=56%, list=36%, signal=87%
GSE14415_TCONV_VS_FOXP3_KO_INDUCED_TREG_DN	GSE14415_TCONV_VS_FOXP3_KO_INDUCED_TREG_DN		152	-0.408677	-1.68127	0	0.36898	1	3503	tags=50%, list=30%, signal=70%
KEGG_STEROID_BIOSYNTHESIS	KEGG_STEROID_BIOSYNTHESIS		16	-0.627262	-1.67836	0.0395349	0.373779	1	1142	tags=25%, list=10%, signal=28%
GOBP_MRNA_PROCESSING	GOBP_MRNA_PROCESSING		413	-0.365191	-1.67692	0	0.3746	1	4292	tags=49%, list=36%, signal=75%
GOMF_TRANSLATION_FACTOR_ACTIVITY_RNA_BINDING	GOMF_TRANSLATION_FACTOR_ACTIVITY_RNA_BINDING		69	-0.464097	-1.67435	0.00859599	0.378185	1	4314	tags=62%, list=37%, signal=98%
GOBP_SECONDARY_METABOLIC_PROCESS	GOBP_SECONDARY_METABOLIC_PROCESS		23	-0.573565	-1.67024	0.0208817	0.386229	1	1975	tags=39%, list=17%, signal=47%
GSE24972_WT_VS_IRF8_KO_MARGINAL_ZONE_SPLEEN_BCELL_DN	GSE24972_WT_VS_IRF8_KO_MARGINAL_ZONE_SPLEEN_BCELL_DN		91	-0.441952	-1.66996	0.00294985	0.383677	1	2360	tags=36%, list=20%, signal=45%
HP_CEREBRAL_WHITE_MATTER_ATROPHY	HP_CEREBRAL_WHITE_MATTER_ATROPHY		27	-0.547308	-1.66342	0.0283688	0.399488	1	3130	tags=56%, list=26%, signal=75%
GOCC_KINETOCHORE	GOCC_KINETOCHORE		121	-0.416951	-1.66289	0.00977199	0.397602	1	4181	tags=60%, list=35%, signal=91%
GSE6259_FLT3L_INDUCED_33D1_POS_DC_VS_CD4_TCELL_DN	GSE6259_FLT3L_INDUCED_33D1_POS_DC_VS_CD4_TCELL_DN		136	-0.411332	-1.66089	0	0.400258	1	1773	tags=30%, list=15%, signal=35%
GSE8515_CTRL_VS_IL6_4H_STIM_MAC_UP	GSE8515_CTRL_VS_IL6_4H_STIM_MAC_UP		145	-0.410218	-1.65954	0.00350877	0.40044	1	3300	tags=45%, list=28%, signal=61%
KEGG_DNA_REPLICATION	KEGG_DNA_REPLICATION		29	-0.545855	-1.65918	0.0129534	0.398061	1	2608	tags=52%, list=22%, signal=66%
GOBP_DNA_DEPENDENT_DNA_REPLICATION	GOBP_DNA_DEPENDENT_DNA_REPLICATION		135	-0.413453	-1.6573	0	0.400188	1	3864	tags=56%, list=33%, signal=82%
GOBP_RIBONUCLEOPROTEIN_COMPLEX_BIOGENESIS	GOBP_RIBONUCLEOPROTEIN_COMPLEX_BIOGENESIS		353	-0.370211	-1.65592	0	0.401256	1	4325	tags=51%, list=37%, signal=78%
GOBP_HISTONE_PHOSPHORYLATION	GOBP_HISTONE_PHOSPHORYLATION		32	-0.546962	-1.65582	0.00735294	0.398306	1	3339	tags=66%, list=28%, signal=91%
GOBP_REGULATION_OF_CHROMOSOME_SEPARATION	GOBP_REGULATION_OF_CHROMOSOME_SEPARATION		62	-0.475618	-1.65511	0.0174419	0.396984	1	4628	tags=69%, list=39%, signal=113%
GOMF_NEUROTRANSMITTER_RECEPTOR_ACTIVITY	GOMF_NEUROTRANSMITTER_RECEPTOR_ACTIVITY		25	-0.569066	-1.654	0.0156951	0.39696	1	476	tags=28%, list=4%, signal=29%
HP_HORSESHOE_KIDNEY	HP_HORSESHOE_KIDNEY		56	-0.482767	-1.65374	0.0132979	0.394598	1	1448	tags=32%, list=12%, signal=36%
HP_ABNORMALITY_OF_OCULAR_SMOOTH_PURSUIT	HP_ABNORMALITY_OF_OCULAR_SMOOTH_PURSUIT		46	-0.488566	-1.65301	0.0130208	0.39356	1	4073	tags=67%, list=34%, signal=102%
GOMF_MISFOLDED_PROTEIN_BINDING	GOMF_MISFOLDED_PROTEIN_BINDING		24	-0.557887	-1.65244	0.0271605	0.391866	1	2543	tags=42%, list=22%, signal=53%
GOMF_EXONUCLEASE_ACTIVITY_ACTIVE_WITH_EITHER_RIBO_OR_DEOXYRIBONUCLEIC_ACIDS_AND_PRODUCING_5_PHOSPHOMONOESTERS	GOMF_EXONUCLEASE_ACTIVITY_ACTIVE_WITH_EITHER_RIBO_OR_DEOXYRIBONUCLEIC_ACIDS_AND_PRODUCING_5_PHOSPHOMONOESTERS		54	-0.48786	-1.65153	0.0129199	0.391404	1	3401	tags=56%, list=29%, signal=78%
GSE22886_NAIVE_CD4_TCELL_VS_48H_ACT_TH2_DN	GSE22886_NAIVE_CD4_TCELL_VS_48H_ACT_TH2_DN		171	-0.390848	-1.65022	0.00369004	0.392162	1	4064	tags=51%, list=34%, signal=77%
GOCC_SIN3_TYPE_COMPLEX	GOCC_SIN3_TYPE_COMPLEX		15	-0.637553	-1.64873	0.0367647	0.393408	1	3502	tags=73%, list=30%, signal=104%
GOBP_SISTER_CHROMATID_SEGREGATION	GOBP_SISTER_CHROMATID_SEGREGATION		162	-0.393454	-1.64866	0	0.390562	1	4628	tags=64%, list=39%, signal=103%
GOBP_METAPHASE_ANAPHASE_TRANSITION_OF_CELL_CYCLE	GOBP_METAPHASE_ANAPHASE_TRANSITION_OF_CELL_CYCLE		57	-0.476487	-1.64622	0.00806452	0.394092	1	4628	tags=70%, list=39%, signal=115%
GSE44649_NAIVE_VS_ACTIVATED_CD8_TCELL_DN	GSE44649_NAIVE_VS_ACTIVATED_CD8_TCELL_DN		175	-0.383867	-1.64552	0	0.393316	1	3646	tags=50%, list=31%, signal=72%
GOBP_RNA_SPLICING	GOBP_RNA_SPLICING		363	-0.357636	-1.64546	0	0.390615	1	4292	tags=48%, list=36%, signal=74%
HP_ABNORMAL_ATRIAL_ARRANGEMENT	HP_ABNORMAL_ATRIAL_ARRANGEMENT		21	-0.59242	-1.64435	0.0285036	0.390567	1	585	tags=29%, list=5%, signal=30%
HP_MULTIPLE_CAFE_AU_LAIT_SPOTS	HP_MULTIPLE_CAFE_AU_LAIT_SPOTS		55	-0.469615	-1.64401	0.0114286	0.388604	1	2299	tags=44%, list=19%, signal=54%
HP_EEG_WITH_ABNORMALLY_SLOW_FREQUENCIES	HP_EEG_WITH_ABNORMALLY_SLOW_FREQUENCIES		46	-0.500987	-1.64382	0.013624	0.386293	1	1446	tags=22%, list=12%, signal=25%
GOBP_PURINE_NUCLEOSIDE_MONOPHOSPHATE_METABOLIC_PROCESS	GOBP_PURINE_NUCLEOSIDE_MONOPHOSPHATE_METABOLIC_PROCESS		32	-0.536952	-1.64318	0.02267	0.385087	1	1494	tags=31%, list=13%, signal=36%
HP_MELANOMA	HP_MELANOMA		57	-0.471222	-1.64271	0.0135135	0.383602	1	1940	tags=44%, list=16%, signal=52%
GOBP_POSITIVE_REGULATION_OF_CELL_KILLING	GOBP_POSITIVE_REGULATION_OF_CELL_KILLING		42	-0.516515	-1.64271	0.0162602	0.380881	1	2093	tags=50%, list=18%, signal=61%
GOBP_NUCLEOSIDE_MONOPHOSPHATE_METABOLIC_PROCESS	GOBP_NUCLEOSIDE_MONOPHOSPHATE_METABOLIC_PROCESS		51	-0.478049	-1.64233	0.00840336	0.379209	1	1495	tags=27%, list=13%, signal=31%
GOBP_TOLL_LIKE_RECEPTOR_2_SIGNALING_PATHWAY	GOBP_TOLL_LIKE_RECEPTOR_2_SIGNALING_PATHWAY		15	-0.628621	-1.63966	0.0322581	0.383321	1	1173	tags=33%, list=10%, signal=37%
HP_FEMALE_INFERTILITY	HP_FEMALE_INFERTILITY		24	-0.571485	-1.63639	0.0290557	0.389865	1	585	tags=25%, list=5%, signal=26%
KANNAN_BLOOD_2012_2013_TIV_AGE_65PLS_REVACCINATED_IN_6_9_MO_VS_REVACCINATED_IN_12_13_MO_UP	KANNAN_BLOOD_2012_2013_TIV_AGE_65PLS_REVACCINATED_IN_6_9_MO_VS_REVACCINATED_IN_12_13_MO_UP		148	-0.402631	-1.63503	0.00330033	0.391039	1	2149	tags=32%, list=18%, signal=39%
GOBP_PYRIMIDINE_RIBONUCLEOTIDE_METABOLIC_PROCESS	GOBP_PYRIMIDINE_RIBONUCLEOTIDE_METABOLIC_PROCESS		18	-0.588923	-1.63476	0.0289157	0.389124	1	3787	tags=72%, list=32%, signal=106%
HP_SLENDER_BUILD	HP_SLENDER_BUILD		25	-0.548048	-1.63103	0.0248756	0.396619	1	1562	tags=44%, list=13%, signal=51%
GOMF_STRUCTURAL_CONSTITUENT_OF_NUCLEAR_PORE	GOMF_STRUCTURAL_CONSTITUENT_OF_NUCLEAR_PORE		20	-0.58198	-1.62866	0.032419	0.400388	1	4479	tags=80%, list=38%, signal=129%
GOBP_NCRNA_EXPORT_FROM_NUCLEUS	GOBP_NCRNA_EXPORT_FROM_NUCLEUS		29	-0.545407	-1.62662	0.0228426	0.402767	1	4479	tags=72%, list=38%, signal=116%
GSE37533_PPARG1_FOXP3_VS_PPARG2_FOXP3_TRANSDUCED_CD4_TCELL_DN	GSE37533_PPARG1_FOXP3_VS_PPARG2_FOXP3_TRANSDUCED_CD4_TCELL_DN		174	-0.378716	-1.6253	0	0.403911	1	2276	tags=32%, list=19%, signal=39%
HP_ABNORMAL_GLYCOSYLATION	HP_ABNORMAL_GLYCOSYLATION		37	-0.512936	-1.62455	0.0180412	0.403195	1	1734	tags=32%, list=15%, signal=38%
GOBP_POSITIVE_REGULATION_OF_RNA_SPLICING	GOBP_POSITIVE_REGULATION_OF_RNA_SPLICING		30	-0.536746	-1.62445	0.014218	0.400861	1	2733	tags=47%, list=23%, signal=61%
GOBP_RIBOSOME_ASSEMBLY	GOBP_RIBOSOME_ASSEMBLY		43	-0.499783	-1.62441	0.0229885	0.398314	1	3953	tags=58%, list=33%, signal=87%
GOCC_CYTOSOLIC_SMALL_RIBOSOMAL_SUBUNIT	GOCC_CYTOSOLIC_SMALL_RIBOSOMAL_SUBUNIT		21	-0.571715	-1.62344	0.0343137	0.398332	1	2549	tags=62%, list=22%, signal=79%
GSE22886_NAIVE_BCELL_VS_NEUTROPHIL_UP	GSE22886_NAIVE_BCELL_VS_NEUTROPHIL_UP		146	-0.405532	-1.62115	0	0.402479	1	3459	tags=48%, list=29%, signal=67%
GOCC_TRANSCRIPTION_ELONGATION_FACTOR_COMPLEX	GOCC_TRANSCRIPTION_ELONGATION_FACTOR_COMPLEX		45	-0.482842	-1.61972	0.0246575	0.40392	1	3798	tags=56%, list=32%, signal=82%
GSE22611_NOD2_TRANSD_VS_CTRL_TRANSD_HEK293_MDP_STIM_2H_DN	GSE22611_NOD2_TRANSD_VS_CTRL_TRANSD_HEK293_MDP_STIM_2H_DN		45	-0.49402	-1.61772	0.016	0.406876	1	592	tags=22%, list=5%, signal=23%
GSE39820_CTRL_VS_TGFBETA3_IL6_IL23A_CD4_TCELL_UP	GSE39820_CTRL_VS_TGFBETA3_IL6_IL23A_CD4_TCELL_UP		177	-0.386648	-1.61769	0	0.404405	1	3867	tags=54%, list=33%, signal=79%
GOMF_RRNA_BINDING	GOMF_RRNA_BINDING		46	-0.467787	-1.61383	0.0276243	0.41279	1	3737	tags=54%, list=32%, signal=79%
GSE13485_CTRL_VS_DAY1_YF17D_VACCINE_PBMC_UP	GSE13485_CTRL_VS_DAY1_YF17D_VACCINE_PBMC_UP		166	-0.379964	-1.61317	0	0.41197	1	4613	tags=63%, list=39%, signal=102%
GOBP_DNA_PACKAGING	GOBP_DNA_PACKAGING		128	-0.40424	-1.61281	0.00337838	0.41044	1	3598	tags=48%, list=30%, signal=68%
GOBP_RIBOSOMAL_LARGE_SUBUNIT_BIOGENESIS	GOBP_RIBOSOMAL_LARGE_SUBUNIT_BIOGENESIS		49	-0.479054	-1.61213	0.0124688	0.409725	1	1450	tags=27%, list=12%, signal=30%
GOBP_TRANSLESION_SYNTHESIS	GOBP_TRANSLESION_SYNTHESIS		34	-0.522388	-1.61113	0.0328283	0.410163	1	2581	tags=47%, list=22%, signal=60%
HP_DECREASED_FERTILITY_IN_FEMALES	HP_DECREASED_FERTILITY_IN_FEMALES		39	-0.493445	-1.60745	0.0324324	0.418446	1	849	tags=21%, list=7%, signal=22%
GOCC_INTEGRATOR_COMPLEX	GOCC_INTEGRATOR_COMPLEX		18	-0.606132	-1.60612	0.0344037	0.41959	1	3515	tags=67%, list=30%, signal=95%
GOCC_NUCLEAR_PORE	GOCC_NUCLEAR_PORE		60	-0.467045	-1.60584	0.0105541	0.417879	1	4479	tags=68%, list=38%, signal=110%
GOMF_DNA_REPLICATION_ORIGIN_BINDING	GOMF_DNA_REPLICATION_ORIGIN_BINDING		22	-0.565873	-1.60335	0.0361174	0.422635	1	2471	tags=55%, list=21%, signal=69%
ZAK_PBMC_MRKAD5_HIV_1_GAG_POL_NEF_AGE_20_50YO_AD5_NAB_TITERS_GTE_200_VS_LTE_200_1DY_UP	ZAK_PBMC_MRKAD5_HIV_1_GAG_POL_NEF_AGE_20_50YO_AD5_NAB_TITERS_GTE_200_VS_LTE_200_1DY_UP		110	-0.413005	-1.60299	0.0121212	0.421046	1	3039	tags=50%, list=26%, signal=67%
GSE11386_NAIVE_VS_MEMORY_BCELL_UP	GSE11386_NAIVE_VS_MEMORY_BCELL_UP		156	-0.390338	-1.60108	0	0.424087	1	3576	tags=50%, list=30%, signal=71%
GSE19888_CTRL_VS_A3R_INHIBITOR_TREATED_MAST_CELL_UP	GSE19888_CTRL_VS_A3R_INHIBITOR_TREATED_MAST_CELL_UP		160	-0.384503	-1.5985	0.00378788	0.428678	1	3647	tags=46%, list=31%, signal=66%
GOBP_DNA_METHYLATION_DEPENDENT_HETEROCHROMATIN_ASSEMBLY	GOBP_DNA_METHYLATION_DEPENDENT_HETEROCHROMATIN_ASSEMBLY		16	-0.617999	-1.59849	0.0382883	0.426223	1	2453	tags=63%, list=21%, signal=79%
GOBP_G0_TO_G1_TRANSITION	GOBP_G0_TO_G1_TRANSITION		40	-0.482177	-1.59847	0.0203046	0.423777	1	4074	tags=65%, list=34%, signal=99%
GOBP_POSITIVE_REGULATION_OF_HISTONE_METHYLATION	GOBP_POSITIVE_REGULATION_OF_HISTONE_METHYLATION		28	-0.539648	-1.59801	0.029484	0.422578	1	2512	tags=43%, list=21%, signal=54%
GSE13485_CTRL_VS_DAY21_YF17D_VACCINE_PBMC_DN	GSE13485_CTRL_VS_DAY21_YF17D_VACCINE_PBMC_DN		62	-0.451393	-1.59755	0.0104167	0.421696	1	592	tags=15%, list=5%, signal=15%
KEGG_DRUG_METABOLISM_OTHER_ENZYMES	KEGG_DRUG_METABOLISM_OTHER_ENZYMES		17	-0.591564	-1.5965	0.0296128	0.422218	1	2247	tags=41%, list=19%, signal=51%
GOBP_RIBONUCLEOSIDE_METABOLIC_PROCESS	GOBP_RIBONUCLEOSIDE_METABOLIC_PROCESS		47	-0.482419	-1.59534	0.0294118	0.423063	1	1671	tags=34%, list=14%, signal=39%
GOMF_FATTY_ACID_DERIVATIVE_BINDING	GOMF_FATTY_ACID_DERIVATIVE_BINDING		17	-0.586446	-1.59373	0.0374707	0.425509	1	1383	tags=29%, list=12%, signal=33%
GOBP_DNA_GEOMETRIC_CHANGE	GOBP_DNA_GEOMETRIC_CHANGE		99	-0.411703	-1.59323	0.00623053	0.424564	1	2804	tags=42%, list=24%, signal=55%
GOBP_REGULATION_OF_RNA_SPLICING	GOBP_REGULATION_OF_RNA_SPLICING		115	-0.405868	-1.59187	0	0.425948	1	3448	tags=45%, list=29%, signal=63%
GSE24726_WT_VS_E2_2_KO_PDC_DAY6_POST_DELETION_UP	GSE24726_WT_VS_E2_2_KO_PDC_DAY6_POST_DELETION_UP		168	-0.379331	-1.59153	0.0037037	0.424618	1	4077	tags=57%, list=35%, signal=85%
GOBP_DENDRITIC_CELL_CHEMOTAXIS	GOBP_DENDRITIC_CELL_CHEMOTAXIS		18	-0.603347	-1.59082	0.0407674	0.424165	1	368	tags=22%, list=3%, signal=23%
HP_APLASIA_OF_THE_FINGERS	HP_APLASIA_OF_THE_FINGERS		44	-0.481379	-1.59033	0.00793651	0.42315	1	1804	tags=39%, list=15%, signal=45%
GOMF_CATALYTIC_ACTIVITY_ACTING_ON_RNA	GOMF_CATALYTIC_ACTIVITY_ACTING_ON_RNA		315	-0.354889	-1.58996	0	0.421814	1	3808	tags=44%, list=32%, signal=64%
GSE22886_NAIVE_CD4_TCELL_VS_NKCELL_DN	GSE22886_NAIVE_CD4_TCELL_VS_NKCELL_DN		170	-0.382002	-1.58986	0	0.419827	1	3836	tags=53%, list=32%, signal=77%
GOBP_NUCLEOSIDE_METABOLIC_PROCESS	GOBP_NUCLEOSIDE_METABOLIC_PROCESS		72	-0.433307	-1.58979	0.0116279	0.417742	1	2375	tags=39%, list=20%, signal=48%
HP_CAFE_AU_LAIT_SPOT	HP_CAFE_AU_LAIT_SPOT		118	-0.403395	-1.58648	0.00641026	0.424568	1	2188	tags=33%, list=19%, signal=40%
GOBP_DNA_STRAND_ELONGATION	GOBP_DNA_STRAND_ELONGATION		23	-0.559551	-1.58206	0.0413625	0.434594	1	3235	tags=70%, list=27%, signal=96%
HP_RHABDOMYOSARCOMA	HP_RHABDOMYOSARCOMA		16	-0.598919	-1.57834	0.0562061	0.442686	1	2707	tags=69%, list=23%, signal=89%
KEGG_DRUG_METABOLISM_CYTOCHROME_P450	KEGG_DRUG_METABOLISM_CYTOCHROME_P450		19	-0.583308	-1.57759	0.036855	0.442564	1	398	tags=21%, list=3%, signal=22%
HP_RESTING_TREMOR	HP_RESTING_TREMOR		36	-0.509729	-1.57724	0.0277078	0.441242	1	342	tags=14%, list=3%, signal=14%
GOMF_NUCLEOTIDE_DIPHOSPHATASE_ACTIVITY	GOMF_NUCLEOTIDE_DIPHOSPHATASE_ACTIVITY		16	-0.5907	-1.57539	0.0341463	0.444299	1	1597	tags=38%, list=14%, signal=43%
GOCC_RNA_POLYMERASE_II_HOLOENZYME	GOCC_RNA_POLYMERASE_II_HOLOENZYME		61	-0.458431	-1.57467	0.0212766	0.444371	1	4984	tags=77%, list=42%, signal=133%
GOCC_PROTEIN_ACETYLTRANSFERASE_COMPLEX	GOCC_PROTEIN_ACETYLTRANSFERASE_COMPLEX		84	-0.41733	-1.57352	0.00854701	0.445272	1	4852	tags=63%, list=41%, signal=106%
HP_ABNORMALITY_OF_THE_PULMONARY_VEINS	HP_ABNORMALITY_OF_THE_PULMONARY_VEINS		34	-0.507309	-1.57343	0.0394737	0.443279	1	585	tags=21%, list=5%, signal=22%
HP_ABNORMALITY_OF_THE_THENAR_EMINENCE	HP_ABNORMALITY_OF_THE_THENAR_EMINENCE		16	-0.600053	-1.57265	0.0727273	0.443328	1	1309	tags=50%, list=11%, signal=56%
GSE33162_HDAC3_KO_VS_HDAC3_KO_4H_LPS_STIM_MACROPHAGE_UP	GSE33162_HDAC3_KO_VS_HDAC3_KO_4H_LPS_STIM_MACROPHAGE_UP		174	-0.372241	-1.57263	0.00347222	0.441134	1	4567	tags=56%, list=39%, signal=90%
GSE2770_IL12_VS_TGFB_AND_IL12_TREATED_ACT_CD4_TCELL_6H_DN	GSE2770_IL12_VS_TGFB_AND_IL12_TREATED_ACT_CD4_TCELL_6H_DN		162	-0.380208	-1.57241	0	0.439584	1	2738	tags=36%, list=23%, signal=46%
GOBP_DNA_REPLICATION_INDEPENDENT_NUCLEOSOME_ORGANIZATION	GOBP_DNA_REPLICATION_INDEPENDENT_NUCLEOSOME_ORGANIZATION		34	-0.497779	-1.57233	0.0248139	0.437571	1	4397	tags=62%, list=37%, signal=98%
GSE22886_IGG_IGA_MEMORY_BCELL_VS_BM_PLASMA_CELL_UP	GSE22886_IGG_IGA_MEMORY_BCELL_VS_BM_PLASMA_CELL_UP		165	-0.378268	-1.57145	0.00337838	0.437769	1	4385	tags=62%, list=37%, signal=97%
GOBP_RNA_SPLICING_VIA_TRANSESTERIFICATION_REACTIONS	GOBP_RNA_SPLICING_VIA_TRANSESTERIFICATION_REACTIONS		291	-0.354894	-1.57137	0	0.435805	1	4669	tags=54%, list=40%, signal=87%
GOCC_NUCLEAR_REPLICATION_FORK	GOCC_NUCLEAR_REPLICATION_FORK		28	-0.517708	-1.57103	0.0453461	0.434611	1	2231	tags=54%, list=19%, signal=66%
GOMF_NUCLEOCYTOPLASMIC_CARRIER_ACTIVITY	GOMF_NUCLEOCYTOPLASMIC_CARRIER_ACTIVITY		27	-0.526538	-1.57075	0.0315534	0.433355	1	4192	tags=70%, list=35%, signal=109%
GOMF_OXIDOREDUCTASE_ACTIVITY_ACTING_ON_PAIRED_DONORS_WITH_INCORPORATION_OR_REDUCTION_OF_MOLECULAR_OXYGEN_NAD_P_H_AS_ONE_DONOR_AND_INCORPORATION_OF_ONE_ATOM_OF_OXYGEN	GOMF_OXIDOREDUCTASE_ACTIVITY_ACTING_ON_PAIRED_DONORS_WITH_INCORPORATION_OR_REDUCTION_OF_MOLECULAR_OXYGEN_NAD_P_H_AS_ONE_DONOR_AND_INCORPORATION_OF_ONE_ATOM_OF_OXYGEN		28	-0.520155	-1.56924	0.03125	0.435364	1	1027	tags=29%, list=9%, signal=31%
GOBP_LONG_CHAIN_FATTY_ACID_BIOSYNTHETIC_PROCESS	GOBP_LONG_CHAIN_FATTY_ACID_BIOSYNTHETIC_PROCESS		15	-0.600442	-1.5686	0.0464037	0.435073	1	547	tags=20%, list=5%, signal=21%
HP_ABNORMAL_PANCREAS_SIZE	HP_ABNORMAL_PANCREAS_SIZE		19	-0.569527	-1.56832	0.0440835	0.433797	1	1497	tags=32%, list=13%, signal=36%
NAKAYA_PBMC_FLUMIST_AGE_18_50YO_7DY_IFN_SUBSET_UP	NAKAYA_PBMC_FLUMIST_AGE_18_50YO_7DY_IFN_SUBSET_UP		32	-0.502745	-1.56691	0.0324826	0.435634	1	3639	tags=53%, list=31%, signal=77%
GOBP_SYNAPTIC_VESICLE_CYTOSKELETAL_TRANSPORT	GOBP_SYNAPTIC_VESICLE_CYTOSKELETAL_TRANSPORT		18	-0.562112	-1.56626	0.0345679	0.435353	1	1607	tags=44%, list=14%, signal=51%
HP_LARGE_FOR_GESTATIONAL_AGE	HP_LARGE_FOR_GESTATIONAL_AGE		28	-0.520423	-1.56617	0.0314961	0.433521	1	1291	tags=25%, list=11%, signal=28%
GSE22886_IGM_MEMORY_BCELL_VS_BM_PLASMA_CELL_UP	GSE22886_IGM_MEMORY_BCELL_VS_BM_PLASMA_CELL_UP		157	-0.375175	-1.56598	0.003861	0.431986	1	4391	tags=55%, list=37%, signal=86%
GOBP_NEGATIVE_REGULATION_OF_INTRACELLULAR_PROTEIN_TRANSPORT	GOBP_NEGATIVE_REGULATION_OF_INTRACELLULAR_PROTEIN_TRANSPORT		30	-0.519445	-1.56494	0.0473815	0.4328	1	1344	tags=30%, list=11%, signal=34%
HP_ABNORMAL_CALCIUM_PHOSPHATE_REGULATING_HORMONE_LEVEL	HP_ABNORMAL_CALCIUM_PHOSPHATE_REGULATING_HORMONE_LEVEL		30	-0.492449	-1.56456	0.0339426	0.431831	1	206	tags=7%, list=2%, signal=7%
GOCC_PHOTORECEPTOR_INNER_SEGMENT	GOCC_PHOTORECEPTOR_INNER_SEGMENT		24	-0.553134	-1.56178	0.0412371	0.437762	1	768	tags=21%, list=7%, signal=22%
GOCC_TRANSLATION_PREINITIATION_COMPLEX	GOCC_TRANSLATION_PREINITIATION_COMPLEX		17	-0.591104	-1.56117	0.0562771	0.437454	1	4605	tags=94%, list=39%, signal=154%
GOBP_RIBONUCLEOSIDE_MONOPHOSPHATE_METABOLIC_PROCESS	GOBP_RIBONUCLEOSIDE_MONOPHOSPHATE_METABOLIC_PROCESS		41	-0.485173	-1.56094	0.0233161	0.436028	1	1495	tags=27%, list=13%, signal=31%
GOBP_CHAPERONE_COFACTOR_DEPENDENT_PROTEIN_REFOLDING	GOBP_CHAPERONE_COFACTOR_DEPENDENT_PROTEIN_REFOLDING		25	-0.522843	-1.55995	0.0451128	0.43669	1	3704	tags=56%, list=31%, signal=81%
GOBP_PROTEIN_MONOUBIQUITINATION	GOBP_PROTEIN_MONOUBIQUITINATION		57	-0.446788	-1.55953	0.0162162	0.435971	1	3254	tags=51%, list=28%, signal=70%
GSE5099_UNSTIM_VS_MCSF_TREATED_MONOCYTE_DAY7_UP	GSE5099_UNSTIM_VS_MCSF_TREATED_MONOCYTE_DAY7_UP		168	-0.375262	-1.5595	0.00784314	0.434028	1	3562	tags=46%, list=30%, signal=65%
GOBP_MELANOCYTE_DIFFERENTIATION	GOBP_MELANOCYTE_DIFFERENTIATION		17	-0.591127	-1.55948	0.0477327	0.432103	1	568	tags=35%, list=5%, signal=37%
GOMF_SOLUTE_SODIUM_SYMPORTER_ACTIVITY	GOMF_SOLUTE_SODIUM_SYMPORTER_ACTIVITY		25	-0.532267	-1.55946	0.0383632	0.43018	1	1629	tags=40%, list=14%, signal=46%
HP_ABNORMAL_PROTEIN_GLYCOSYLATION	HP_ABNORMAL_PROTEIN_GLYCOSYLATION		31	-0.500757	-1.55733	0.0380711	0.434144	1	1734	tags=32%, list=15%, signal=38%
GSE14000_TRANSLATED_RNA_VS_MRNA_DC_UP	GSE14000_TRANSLATED_RNA_VS_MRNA_DC_UP		177	-0.371921	-1.55684	0.0111111	0.433443	1	5172	tags=64%, list=44%, signal=113%
GOCC_CYCLIN_DEPENDENT_PROTEIN_KINASE_HOLOENZYME_COMPLEX	GOCC_CYCLIN_DEPENDENT_PROTEIN_KINASE_HOLOENZYME_COMPLEX		34	-0.492183	-1.55612	0.03125	0.433543	1	3290	tags=65%, list=28%, signal=89%
GOMF_TRANSLATION_REGULATOR_ACTIVITY_NUCLEIC_ACID_BINDING	GOMF_TRANSLATION_REGULATOR_ACTIVITY_NUCLEIC_ACID_BINDING		82	-0.421526	-1.55451	0.00304878	0.436225	1	4314	tags=59%, list=37%, signal=92%
GSE10239_MEMORY_VS_KLRG1INT_EFF_CD8_TCELL_DN	GSE10239_MEMORY_VS_KLRG1INT_EFF_CD8_TCELL_DN		180	-0.365435	-1.55326	0.00738007	0.437865	1	3409	tags=47%, list=29%, signal=65%
GOBP_PROTEIN_LOCALIZATION_TO_CHROMOSOME_CENTROMERIC_REGION	GOBP_PROTEIN_LOCALIZATION_TO_CHROMOSOME_CENTROMERIC_REGION		21	-0.55272	-1.55316	0.0562061	0.436227	1	4251	tags=71%, list=36%, signal=111%
HP_FACIAL_HYPOTONIA	HP_FACIAL_HYPOTONIA		30	-0.509895	-1.55075	0.043578	0.441291	1	2440	tags=27%, list=21%, signal=34%
GOMF_NUCLEAR_LOCALIZATION_SEQUENCE_BINDING	GOMF_NUCLEAR_LOCALIZATION_SEQUENCE_BINDING		19	-0.562321	-1.55072	0.0380048	0.439454	1	3994	tags=74%, list=34%, signal=111%
GOMF_DNA_HELICASE_ACTIVITY	GOMF_DNA_HELICASE_ACTIVITY		67	-0.42562	-1.55067	0.0141243	0.437643	1	2581	tags=42%, list=22%, signal=53%
KEGG_CYSTEINE_AND_METHIONINE_METABOLISM	KEGG_CYSTEINE_AND_METHIONINE_METABOLISM		23	-0.538035	-1.55067	0.04	0.435737	1	3664	tags=57%, list=31%, signal=82%
HOFT_CD4_POSITIVE_ALPHA_BETA_MEMORY_T_CELL_BCG_VACCINE_AGE_18_45YO_ID_56D_TOP_100_DEG_AFTER_IN_VITRO_RE_STIMULATION_DN	HOFT_CD4_POSITIVE_ALPHA_BETA_MEMORY_T_CELL_BCG_VACCINE_AGE_18_45YO_ID_56D_TOP_100_DEG_AFTER_IN_VITRO_RE_STIMULATION_DN		34	-0.499299	-1.55036	0.0336538	0.434625	1	1843	tags=41%, list=16%, signal=49%
GOBP_ERROR_FREE_TRANSLESION_SYNTHESIS	GOBP_ERROR_FREE_TRANSLESION_SYNTHESIS		19	-0.571883	-1.54854	0.0461894	0.437683	1	2581	tags=58%, list=22%, signal=74%
HP_AKINESIA	HP_AKINESIA		20	-0.572978	-1.54659	0.0483871	0.44141	1	1677	tags=40%, list=14%, signal=47%
GOMF_HELICASE_ACTIVITY	GOMF_HELICASE_ACTIVITY		132	-0.381532	-1.54541	0	0.44298	1	3808	tags=48%, list=32%, signal=70%
HP_ABNORMAL_ST_SEGMENT	HP_ABNORMAL_ST_SEGMENT		23	-0.539514	-1.54524	0.0605327	0.441624	1	1291	tags=30%, list=11%, signal=34%
GOMF_CATION_TRANSMEMBRANE_TRANSPORTER_ACTIVITY	GOMF_CATION_TRANSMEMBRANE_TRANSPORTER_ACTIVITY		330	-0.337504	-1.54421	0	0.442563	1	1729	tags=22%, list=15%, signal=25%
GOMF_CATION_CHANNEL_ACTIVITY	GOMF_CATION_CHANNEL_ACTIVITY		152	-0.374928	-1.54413	0.00655738	0.440903	1	559	tags=14%, list=5%, signal=15%
GSE22886_NAIVE_TCELL_VS_NEUTROPHIL_UP	GSE22886_NAIVE_TCELL_VS_NEUTROPHIL_UP		166	-0.372709	-1.5441	0	0.439145	1	4077	tags=49%, list=35%, signal=74%
HP_MALE_PSEUDOHERMAPHRODITISM	HP_MALE_PSEUDOHERMAPHRODITISM		23	-0.540744	-1.54377	0.0389294	0.438329	1	6	tags=4%, list=0%, signal=4%
QI_PBMC_ZOSTAVAX_AGE_50_75YO_CORRELATED_WITH_28D_PEAK_T_CELL_RESPONSE_14DY_NEGATIVE	QI_PBMC_ZOSTAVAX_AGE_50_75YO_CORRELATED_WITH_28D_PEAK_T_CELL_RESPONSE_14DY_NEGATIVE		33	-0.505245	-1.54356	0.0325	0.437119	1	4080	tags=64%, list=35%, signal=97%
GSE21063_WT_VS_NFATC1_KO_BCELL_DN	GSE21063_WT_VS_NFATC1_KO_BCELL_DN		180	-0.367492	-1.54294	0	0.436969	1	3442	tags=43%, list=29%, signal=59%
ZAK_PBMC_MRKAD5_HIV_1_GAG_POL_NEF_AGE_20_50YO_CORRELATED_WITH_CD8_T_CELL_RESPONSE_3DY_POSITIVE	ZAK_PBMC_MRKAD5_HIV_1_GAG_POL_NEF_AGE_20_50YO_CORRELATED_WITH_CD8_T_CELL_RESPONSE_3DY_POSITIVE		61	-0.437059	-1.54236	0.00795756	0.436701	1	4493	tags=67%, list=38%, signal=108%
GSE39820_CTRL_VS_TGFBETA1_IL6_IL23A_CD4_TCELL_UP	GSE39820_CTRL_VS_TGFBETA1_IL6_IL23A_CD4_TCELL_UP		173	-0.375893	-1.54136	0	0.437791	1	3981	tags=56%, list=34%, signal=83%
GOCC_REPLICATION_FORK	GOCC_REPLICATION_FORK		55	-0.444152	-1.53951	0.0182768	0.440996	1	4367	tags=71%, list=37%, signal=112%
GSE5679_CTRL_VS_PPARG_LIGAND_ROSIGLITAZONE_TREATED_DC_UP	GSE5679_CTRL_VS_PPARG_LIGAND_ROSIGLITAZONE_TREATED_DC_UP		171	-0.3651	-1.53857	0.00328947	0.441775	1	3424	tags=39%, list=29%, signal=54%
GSE27859_DC_VS_CD11C_INT_F480_HI_MACROPHAGE_UP	GSE27859_DC_VS_CD11C_INT_F480_HI_MACROPHAGE_UP		160	-0.37351	-1.53831	0	0.440689	1	3955	tags=47%, list=33%, signal=70%
GOBP_VITAMIN_BIOSYNTHETIC_PROCESS	GOBP_VITAMIN_BIOSYNTHETIC_PROCESS		15	-0.597814	-1.53827	0.0575221	0.439036	1	8	tags=7%, list=0%, signal=7%
GOBP_PURINE_NUCLEOSIDE_METABOLIC_PROCESS	GOBP_PURINE_NUCLEOSIDE_METABOLIC_PROCESS		44	-0.468378	-1.53763	0.0151515	0.439099	1	1596	tags=32%, list=14%, signal=37%
GSE4748_CTRL_VS_CYANOBACTERIUM_LPSLIKE_STIM_DC_3H_UP	GSE4748_CTRL_VS_CYANOBACTERIUM_LPSLIKE_STIM_DC_3H_UP		157	-0.374398	-1.5376	0.00716846	0.437387	1	2284	tags=31%, list=19%, signal=37%
GOCC_EUKARYOTIC_TRANSLATION_INITIATION_FACTOR_3_COMPLEX	GOCC_EUKARYOTIC_TRANSLATION_INITIATION_FACTOR_3_COMPLEX		16	-0.588079	-1.53632	0.0572082	0.439385	1	4605	tags=94%, list=39%, signal=153%
GOMF_RNA_METHYLTRANSFERASE_ACTIVITY	GOMF_RNA_METHYLTRANSFERASE_ACTIVITY		58	-0.430221	-1.53492	0.0169492	0.441652	1	4601	tags=64%, list=39%, signal=104%
HP_ACUTE_MYELOID_LEUKEMIA	HP_ACUTE_MYELOID_LEUKEMIA		47	-0.454353	-1.5342	0.0131234	0.441909	1	1411	tags=36%, list=12%, signal=41%
GOBP_NUCLEAR_TRANSCRIBED_MRNA_CATABOLIC_PROCESS_EXONUCLEOLYTIC	GOBP_NUCLEAR_TRANSCRIBED_MRNA_CATABOLIC_PROCESS_EXONUCLEOLYTIC		31	-0.501797	-1.53395	0.038835	0.440833	1	3265	tags=45%, list=28%, signal=62%
HP_ABNORMALITY_OF_THE_PUBIC_HAIR	HP_ABNORMALITY_OF_THE_PUBIC_HAIR		27	-0.510707	-1.5339	0.0513447	0.439239	1	830	tags=22%, list=7%, signal=24%
GOBP_RNA_METHYLATION	GOBP_RNA_METHYLATION		71	-0.42917	-1.53351	0.0231884	0.438536	1	4601	tags=65%, list=39%, signal=105%
GOBP_CHROMOSOME_CONDENSATION	GOBP_CHROMOSOME_CONDENSATION		24	-0.524254	-1.53334	0.0322581	0.437327	1	3576	tags=54%, list=30%, signal=78%
GOBP_VITAMIN_D_METABOLIC_PROCESS	GOBP_VITAMIN_D_METABOLIC_PROCESS		15	-0.583848	-1.53327	0.0589569	0.435795	1	119	tags=13%, list=1%, signal=13%
KEGG_RETINOL_METABOLISM	KEGG_RETINOL_METABOLISM		16	-0.567956	-1.53297	0.0593824	0.434903	1	46	tags=13%, list=0%, signal=13%
GSE20198_IL12_VS_IL12_IL18_TREATED_ACT_CD4_TCELL_UP	GSE20198_IL12_VS_IL12_IL18_TREATED_ACT_CD4_TCELL_UP		171	-0.370952	-1.53281	0	0.433671	1	4092	tags=47%, list=35%, signal=71%
GOBP_REGULATION_OF_B_CELL_APOPTOTIC_PROCESS	GOBP_REGULATION_OF_B_CELL_APOPTOTIC_PROCESS		16	-0.584684	-1.53257	0.0544554	0.432593	1	1454	tags=38%, list=12%, signal=43%
GOBP_PROTEIN_REFOLDING	GOBP_PROTEIN_REFOLDING		17	-0.581401	-1.53218	0.060241	0.43202	1	2200	tags=47%, list=19%, signal=58%
GOMF_CYCLIN_DEPENDENT_PROTEIN_SERINE_THREONINE_KINASE_REGULATOR_ACTIVITY	GOMF_CYCLIN_DEPENDENT_PROTEIN_SERINE_THREONINE_KINASE_REGULATOR_ACTIVITY		35	-0.499787	-1.53159	0.039604	0.431979	1	3290	tags=57%, list=28%, signal=79%
HP_KETONURIA	HP_KETONURIA		16	-0.575712	-1.53134	0.0395349	0.431059	1	3342	tags=56%, list=28%, signal=78%
GOBP_SNRNA_TRANSCRIPTION	GOBP_SNRNA_TRANSCRIPTION		69	-0.428804	-1.53053	0.0215054	0.431749	1	4241	tags=64%, list=36%, signal=99%
GSE14415_TCONV_VS_FOXP3_KO_INDUCED_TREG_UP	GSE14415_TCONV_VS_FOXP3_KO_INDUCED_TREG_UP		141	-0.378602	-1.53032	0.00974026	0.430657	1	3815	tags=46%, list=32%, signal=67%
GOBP_TOLERANCE_INDUCTION	GOBP_TOLERANCE_INDUCTION		19	-0.559697	-1.53026	0.053528	0.429178	1	1397	tags=37%, list=12%, signal=42%
GOBP_DNA_STRAND_ELONGATION_INVOLVED_IN_DNA_REPLICATION	GOBP_DNA_STRAND_ELONGATION_INVOLVED_IN_DNA_REPLICATION		17	-0.585006	-1.52993	0.0531178	0.428403	1	2524	tags=65%, list=21%, signal=82%
GOBP_MITOCHONDRIAL_OUTER_MEMBRANE_PERMEABILIZATION	GOBP_MITOCHONDRIAL_OUTER_MEMBRANE_PERMEABILIZATION		44	-0.462971	-1.52937	0.0337662	0.428433	1	2171	tags=41%, list=18%, signal=50%
GOBP_NEGATIVE_REGULATION_OF_LEUKOCYTE_MEDIATED_IMMUNITY	GOBP_NEGATIVE_REGULATION_OF_LEUKOCYTE_MEDIATED_IMMUNITY		33	-0.492057	-1.52928	0.0334928	0.427132	1	1183	tags=27%, list=10%, signal=30%
GOBP_REGULATION_OF_CELLULAR_RESPONSE_TO_HEAT	GOBP_REGULATION_OF_CELLULAR_RESPONSE_TO_HEAT		65	-0.43453	-1.52892	0.0130548	0.426501	1	3493	tags=49%, list=30%, signal=70%
GOBP_NCRNA_TRANSCRIPTION	GOBP_NCRNA_TRANSCRIPTION		97	-0.397655	-1.52835	0.00607903	0.426469	1	3652	tags=49%, list=31%, signal=71%
GOBP_DE_NOVO_PROTEIN_FOLDING	GOBP_DE_NOVO_PROTEIN_FOLDING		31	-0.489769	-1.52815	0.0425532	0.425372	1	3704	tags=48%, list=31%, signal=70%
GOBP_RESPONSE_TO_XENOBIOTIC_STIMULUS	GOBP_RESPONSE_TO_XENOBIOTIC_STIMULUS		46	-0.457332	-1.52738	0.0396825	0.425927	1	822	tags=11%, list=7%, signal=12%
GOBP_NEUTRAL_LIPID_CATABOLIC_PROCESS	GOBP_NEUTRAL_LIPID_CATABOLIC_PROCESS		29	-0.530558	-1.52702	0.0609418	0.425466	1	184	tags=7%, list=2%, signal=7%
GOBP_INORGANIC_ION_IMPORT_ACROSS_PLASMA_MEMBRANE	GOBP_INORGANIC_ION_IMPORT_ACROSS_PLASMA_MEMBRANE		56	-0.437828	-1.52648	0.0218579	0.425287	1	893	tags=18%, list=8%, signal=19%
GOCC_U2_TYPE_CATALYTIC_STEP_2_SPLICEOSOME	GOCC_U2_TYPE_CATALYTIC_STEP_2_SPLICEOSOME		26	-0.515768	-1.52485	0.0732861	0.428176	1	3849	tags=58%, list=33%, signal=85%
GSE10325_BCELL_VS_LUPUS_BCELL_DN	GSE10325_BCELL_VS_LUPUS_BCELL_DN		172	-0.360368	-1.5222	0	0.43367	1	2985	tags=30%, list=25%, signal=40%
GOMF_PHOSPHOTRANSFERASE_ACTIVITY_PHOSPHATE_GROUP_AS_ACCEPTOR	GOMF_PHOSPHOTRANSFERASE_ACTIVITY_PHOSPHATE_GROUP_AS_ACCEPTOR		26	-0.514259	-1.52176	0.0623441	0.433215	1	1069	tags=23%, list=9%, signal=25%
GOBP_T_CELL_CHEMOTAXIS	GOBP_T_CELL_CHEMOTAXIS		17	-0.554485	-1.5216	0.0592255	0.432097	1	1736	tags=47%, list=15%, signal=55%
GSE46025_WT_VS_FOXO1_KO_KLRG1_LOW_CD8_EFFECTOR_TCELL_DN	GSE46025_WT_VS_FOXO1_KO_KLRG1_LOW_CD8_EFFECTOR_TCELL_DN		143	-0.375442	-1.52071	0	0.432893	1	3462	tags=52%, list=29%, signal=73%
GOBP_POSITIVE_REGULATION_OF_MEIOTIC_CELL_CYCLE	GOBP_POSITIVE_REGULATION_OF_MEIOTIC_CELL_CYCLE		16	-0.582103	-1.5202	0.0847059	0.432783	1	251	tags=13%, list=2%, signal=13%
GOBP_RNA_EXPORT_FROM_NUCLEUS	GOBP_RNA_EXPORT_FROM_NUCLEUS		107	-0.389363	-1.52016	0.00630915	0.431365	1	4698	tags=57%, list=40%, signal=94%
GSE37416_12H_VS_48H_F_TULARENSIS_LVS_NEUTROPHIL_DN	GSE37416_12H_VS_48H_F_TULARENSIS_LVS_NEUTROPHIL_DN		122	-0.385303	-1.52002	0.00328947	0.430188	1	2223	tags=30%, list=19%, signal=36%
GOBP_REGULATION_OF_HISTONE_H3_K9_METHYLATION	GOBP_REGULATION_OF_HISTONE_H3_K9_METHYLATION		15	-0.595474	-1.51987	0.0538793	0.429097	1	2436	tags=47%, list=21%, signal=59%
HP_HYPOPLASIA_OF_THE_FRONTAL_LOBES	HP_HYPOPLASIA_OF_THE_FRONTAL_LOBES		30	-0.502277	-1.51909	0.040201	0.429724	1	3711	tags=47%, list=31%, signal=68%
GOMF_TRNA_METHYLTRANSFERASE_ACTIVITY	GOMF_TRNA_METHYLTRANSFERASE_ACTIVITY		28	-0.515847	-1.51838	0.0493151	0.430244	1	4469	tags=68%, list=38%, signal=109%
GOCC_DNA_REPAIR_COMPLEX	GOCC_DNA_REPAIR_COMPLEX		33	-0.494531	-1.51822	0.0541237	0.429145	1	4785	tags=76%, list=41%, signal=127%
GSE9878_CTRL_VS_EBF_TRANSDUCED_PAX5_KO_PRO_BCELL_DN	GSE9878_CTRL_VS_EBF_TRANSDUCED_PAX5_KO_PRO_BCELL_DN		174	-0.360036	-1.51731	0.0123967	0.430279	1	3564	tags=49%, list=30%, signal=70%
HP_WHEEZING	HP_WHEEZING		24	-0.516055	-1.51662	0.0509709	0.430772	1	585	tags=25%, list=5%, signal=26%
HP_OVERWEIGHT	HP_OVERWEIGHT		15	-0.576109	-1.51605	0.0819672	0.430801	1	27	tags=7%, list=0%, signal=7%
GSE12003_4D_VS_8D_CULTURE_BM_PROGENITOR_DN	GSE12003_4D_VS_8D_CULTURE_BM_PROGENITOR_DN		107	-0.389878	-1.51584	0.0153846	0.429898	1	1827	tags=23%, list=15%, signal=27%
GOBP_RNA_MODIFICATION	GOBP_RNA_MODIFICATION		138	-0.373065	-1.51394	0.0033557	0.433763	1	4522	tags=54%, list=38%, signal=86%
GOBP_PROTEIN_DNA_COMPLEX_SUBUNIT_ORGANIZATION	GOBP_PROTEIN_DNA_COMPLEX_SUBUNIT_ORGANIZATION		173	-0.365348	-1.51207	0.00334448	0.437478	1	2933	tags=39%, list=25%, signal=52%
GOBP_PROTEIN_LOCALIZATION_TO_KINETOCHORE	GOBP_PROTEIN_LOCALIZATION_TO_KINETOCHORE		16	-0.570945	-1.51168	0.0653753	0.437107	1	2624	tags=56%, list=22%, signal=72%
GSE13547_CTRL_VS_ANTI_IGM_STIM_ZFX_KO_BCELL_2H_UP	GSE13547_CTRL_VS_ANTI_IGM_STIM_ZFX_KO_BCELL_2H_UP		130	-0.378239	-1.51096	0.0163934	0.437694	1	3181	tags=38%, list=27%, signal=52%
GSE22601_DOUBLE_POSITIVE_VS_CD4_SINGLE_POSITIVE_THYMOCYTE_DN	GSE22601_DOUBLE_POSITIVE_VS_CD4_SINGLE_POSITIVE_THYMOCYTE_DN		173	-0.362503	-1.51021	0.0101351	0.43828	1	3371	tags=44%, list=29%, signal=61%
GOBP_RNA_3_END_PROCESSING	GOBP_RNA_3_END_PROCESSING		121	-0.376469	-1.50962	0.00662252	0.438449	1	4777	tags=57%, list=40%, signal=95%
GOMF_5_3_EXONUCLEASE_ACTIVITY	GOMF_5_3_EXONUCLEASE_ACTIVITY		18	-0.55724	-1.50915	0.0607477	0.438327	1	3542	tags=67%, list=30%, signal=95%
HP_GLIOBLASTOMA_MULTIFORME	HP_GLIOBLASTOMA_MULTIFORME		19	-0.554451	-1.50891	0.0722892	0.437471	1	2188	tags=47%, list=19%, signal=58%
GOBP_MITOCHONDRIAL_GENOME_MAINTENANCE	GOBP_MITOCHONDRIAL_GENOME_MAINTENANCE		17	-0.560258	-1.50873	0.0646552	0.436551	1	1760	tags=41%, list=15%, signal=48%
GSE16385_MONOCYTE_VS_12H_ROSIGLITAZONE_TREATED_MACROPHAGE_DN	GSE16385_MONOCYTE_VS_12H_ROSIGLITAZONE_TREATED_MACROPHAGE_DN		165	-0.367478	-1.50867	0.00738007	0.435272	1	4425	tags=54%, list=37%, signal=85%
GOBP_TRICARBOXYLIC_ACID_CYCLE	GOBP_TRICARBOXYLIC_ACID_CYCLE		28	-0.503744	-1.50785	0.055	0.436022	1	5025	tags=71%, list=43%, signal=124%
GOBP_GLYCOSYL_COMPOUND_METABOLIC_PROCESS	GOBP_GLYCOSYL_COMPOUND_METABOLIC_PROCESS		84	-0.401327	-1.50745	0.0200573	0.435533	1	1853	tags=30%, list=16%, signal=35%
HP_TRIPHALANGEAL_THUMB	HP_TRIPHALANGEAL_THUMB		49	-0.44502	-1.50723	0.0213415	0.434793	1	1318	tags=39%, list=11%, signal=43%
GSE7568_IL4_TGFB_DEXAMETHASONE_VS_IL4_TGFB_TREATED_MACROPHAGE_DN	GSE7568_IL4_TGFB_DEXAMETHASONE_VS_IL4_TGFB_TREATED_MACROPHAGE_DN		151	-0.358992	-1.5071	0.0103806	0.43373	1	4056	tags=46%, list=34%, signal=69%
GSE10094_LCMV_VS_LISTERIA_IND_EFF_CD4_TCELL_UP	GSE10094_LCMV_VS_LISTERIA_IND_EFF_CD4_TCELL_UP		174	-0.357298	-1.50703	0.00387597	0.432517	1	4338	tags=55%, list=37%, signal=86%
GOBP_TELOMERE_MAINTENANCE_VIA_SEMI_CONSERVATIVE_REPLICATION	GOBP_TELOMERE_MAINTENANCE_VIA_SEMI_CONSERVATIVE_REPLICATION		23	-0.527178	-1.50677	0.0685279	0.431763	1	2608	tags=57%, list=22%, signal=72%
GOBP_NATURAL_KILLER_CELL_MEDIATED_IMMUNITY	GOBP_NATURAL_KILLER_CELL_MEDIATED_IMMUNITY		39	-0.465188	-1.50595	0.0417755	0.432508	1	1624	tags=33%, list=14%, signal=39%
GSE34156_NOD2_LIGAND_VS_TLR1_TLR2_LIGAND_24H_TREATED_MONOCYTE_DN	GSE34156_NOD2_LIGAND_VS_TLR1_TLR2_LIGAND_24H_TREATED_MONOCYTE_DN		138	-0.370988	-1.50418	0.00974026	0.436093	1	3394	tags=45%, list=29%, signal=62%
GOMF_POTASSIUM_ION_TRANSMEMBRANE_TRANSPORTER_ACTIVITY	GOMF_POTASSIUM_ION_TRANSMEMBRANE_TRANSPORTER_ACTIVITY		62	-0.428747	-1.50399	0.0242588	0.435207	1	149	tags=13%, list=1%, signal=13%
GOBP_REGULATION_OF_CHROMOSOME_SEGREGATION	GOBP_REGULATION_OF_CHROMOSOME_SEGREGATION		75	-0.408293	-1.50337	0.0216216	0.435422	1	4628	tags=69%, list=39%, signal=113%
HP_CHRONIC_RHINITIS	HP_CHRONIC_RHINITIS		26	-0.514903	-1.50329	0.0502645	0.434253	1	585	tags=23%, list=5%, signal=24%
GSE6269_HEALTHY_VS_FLU_INF_PBMC_UP	GSE6269_HEALTHY_VS_FLU_INF_PBMC_UP		134	-0.369476	-1.50324	0.0134228	0.432971	1	2139	tags=24%, list=18%, signal=29%
GOBP_RIBOSOME_BIOGENESIS	GOBP_RIBOSOME_BIOGENESIS		243	-0.344082	-1.50306	0	0.432033	1	4253	tags=47%, list=36%, signal=72%
GOCC_CONDENSED_CHROMOSOME	GOCC_CONDENSED_CHROMOSOME		165	-0.359029	-1.5028	0.00359712	0.431366	1	2650	tags=38%, list=22%, signal=48%
GSE11924_TH1_VS_TH17_CD4_TCELL_DN	GSE11924_TH1_VS_TH17_CD4_TCELL_DN		144	-0.367735	-1.5012	0.00390625	0.434147	1	2691	tags=33%, list=23%, signal=42%
HP_DEEP_PALMAR_CREASE	HP_DEEP_PALMAR_CREASE		15	-0.580668	-1.50115	0.0888889	0.43285	1	2679	tags=47%, list=23%, signal=60%
GSE22611_UNSTIM_VS_2H_MDP_STIM_MUTANT_NOD2_TRANSDUCED_HEK293T_CELL_DN	GSE22611_UNSTIM_VS_2H_MDP_STIM_MUTANT_NOD2_TRANSDUCED_HEK293T_CELL_DN		167	-0.364837	-1.50113	0	0.43154	1	4238	tags=51%, list=36%, signal=78%
GOBP_DNA_REPLICATION_INITIATION	GOBP_DNA_REPLICATION_INITIATION		35	-0.468797	-1.50058	0.0520548	0.431707	1	2471	tags=46%, list=21%, signal=58%
GOMF_RNA_POLYMERASE_CORE_ENZYME_BINDING	GOMF_RNA_POLYMERASE_CORE_ENZYME_BINDING		36	-0.477929	-1.50057	0.0588235	0.430381	1	4139	tags=56%, list=35%, signal=85%
GSE24634_TEFF_VS_TCONV_DAY5_IN_CULTURE_UP	GSE24634_TEFF_VS_TCONV_DAY5_IN_CULTURE_UP		178	-0.35228	-1.49995	0.0107914	0.430665	1	4468	tags=56%, list=38%, signal=88%
HP_CLUBBING_OF_TOES	HP_CLUBBING_OF_TOES		28	-0.495456	-1.49917	0.052356	0.431575	1	1872	tags=46%, list=16%, signal=55%
TSANG_PBMC_FLUVIRIN_PANDEMRIX_ADULT_CORR_WITH_CELL_FREQ_CD27HI_CD38HI_CD20_NEG_PLASMABLASTS_AND_CD38PLUS_OF_IGD_CD27PLUS_MEM_B_CELLS_7DY_POSITIVE	TSANG_PBMC_FLUVIRIN_PANDEMRIX_ADULT_CORR_WITH_CELL_FREQ_CD27HI_CD38HI_CD20_NEG_PLASMABLASTS_AND_CD38PLUS_OF_IGD_CD27PLUS_MEM_B_CELLS_7DY_POSITIVE		65	-0.424326	-1.49883	0.0412088	0.431066	1	1502	tags=22%, list=13%, signal=25%
GOCC_TRANSPORTER_COMPLEX	GOCC_TRANSPORTER_COMPLEX		147	-0.366501	-1.49869	0.00680272	0.430076	1	393	tags=10%, list=3%, signal=10%
GSE2770_IL12_AND_TGFB_VS_IL4_TREATED_ACT_CD4_TCELL_6H_UP	GSE2770_IL12_AND_TGFB_VS_IL4_TREATED_ACT_CD4_TCELL_6H_UP		165	-0.361561	-1.49715	0	0.432869	1	4172	tags=56%, list=35%, signal=85%
HP_DECREASED_FERTILITY_IN_MALES	HP_DECREASED_FERTILITY_IN_MALES		71	-0.408021	-1.49665	0.0451977	0.432979	1	1472	tags=27%, list=12%, signal=30%
GOBP_NEGATIVE_REGULATION_OF_METAPHASE_ANAPHASE_TRANSITION_OF_CELL_CYCLE	GOBP_NEGATIVE_REGULATION_OF_METAPHASE_ANAPHASE_TRANSITION_OF_CELL_CYCLE		37	-0.460287	-1.49532	0.0580475	0.435444	1	4541	tags=65%, list=38%, signal=105%
GOBP_MRNA_MODIFICATION	GOBP_MRNA_MODIFICATION		22	-0.523098	-1.49524	0.0761905	0.434319	1	3571	tags=55%, list=30%, signal=78%
GOBP_REGULATION_OF_DOUBLE_STRAND_BREAK_REPAIR_VIA_HOMOLOGOUS_RECOMBINATION	GOBP_REGULATION_OF_DOUBLE_STRAND_BREAK_REPAIR_VIA_HOMOLOGOUS_RECOMBINATION		43	-0.453423	-1.49496	0.0238727	0.433756	1	1983	tags=33%, list=17%, signal=39%
GOBP_MRNA_METHYLATION	GOBP_MRNA_METHYLATION		16	-0.555996	-1.49375	0.0741573	0.435688	1	4601	tags=75%, list=39%, signal=123%
GSE21670_UNTREATED_VS_TGFB_IL6_TREATED_CD4_TCELL_UP	GSE21670_UNTREATED_VS_TGFB_IL6_TREATED_CD4_TCELL_UP		170	-0.356135	-1.4921	0.00673401	0.438911	1	3758	tags=48%, list=32%, signal=69%
GOMF_DAMAGED_DNA_BINDING	GOMF_DAMAGED_DNA_BINDING		61	-0.422543	-1.49014	0.0297619	0.443009	1	1600	tags=33%, list=14%, signal=38%
GOBP_ERROR_PRONE_TRANSLESION_SYNTHESIS	GOBP_ERROR_PRONE_TRANSLESION_SYNTHESIS		18	-0.5586	-1.48917	0.0696517	0.444406	1	3642	tags=67%, list=31%, signal=96%
GOMF_ACYL_COA_BINDING	GOMF_ACYL_COA_BINDING		18	-0.548853	-1.489	0.0857143	0.443487	1	1383	tags=28%, list=12%, signal=31%
HP_PROXIMAL_TUBULOPATHY	HP_PROXIMAL_TUBULOPATHY		43	-0.445719	-1.48751	0.0434783	0.446275	1	3521	tags=42%, list=30%, signal=59%
GSE12366_PLASMA_CELL_VS_MEMORY_BCELL_DN	GSE12366_PLASMA_CELL_VS_MEMORY_BCELL_DN		157	-0.357556	-1.48676	0	0.446992	1	4399	tags=55%, list=37%, signal=87%
HP_ABNORMALITY_OF_EXOCRINE_PANCREAS_PHYSIOLOGY	HP_ABNORMALITY_OF_EXOCRINE_PANCREAS_PHYSIOLOGY		29	-0.489734	-1.48665	0.0552764	0.446033	1	1411	tags=31%, list=12%, signal=35%
HP_OPISTHOTONUS	HP_OPISTHOTONUS		31	-0.471995	-1.48654	0.0595855	0.445056	1	4275	tags=55%, list=36%, signal=86%
GOCC_CONDENSED_CHROMOSOME_CENTROMERIC_REGION	GOCC_CONDENSED_CHROMOSOME_CENTROMERIC_REGION		101	-0.38113	-1.48613	0.00321543	0.444783	1	4181	tags=58%, list=35%, signal=90%
GOBP_NUCLEOSOME_ORGANIZATION	GOBP_NUCLEOSOME_ORGANIZATION		91	-0.387902	-1.48581	0.0253968	0.44441	1	3598	tags=42%, list=30%, signal=60%
GOBP_PROTEIN_TETRAMERIZATION	GOBP_PROTEIN_TETRAMERIZATION		56	-0.428705	-1.48566	0.0306122	0.443522	1	2268	tags=38%, list=19%, signal=46%
GOBP_REGULATION_OF_CELL_CYCLE_G2_M_PHASE_TRANSITION	GOBP_REGULATION_OF_CELL_CYCLE_G2_M_PHASE_TRANSITION		186	-0.348879	-1.48431	0	0.446086	1	4450	tags=53%, list=38%, signal=83%
GOCC_DNA_PACKAGING_COMPLEX	GOCC_DNA_PACKAGING_COMPLEX		29	-0.48729	-1.48382	0.0564706	0.446063	1	4602	tags=62%, list=39%, signal=101%
GOBP_REGULATION_OF_CELL_CYCLE_CHECKPOINT	GOBP_REGULATION_OF_CELL_CYCLE_CHECKPOINT		28	-0.488691	-1.48373	0.0607595	0.445039	1	2364	tags=43%, list=20%, signal=53%
GOMF_SODIUM_ION_TRANSMEMBRANE_TRANSPORTER_ACTIVITY	GOMF_SODIUM_ION_TRANSMEMBRANE_TRANSPORTER_ACTIVITY		62	-0.412587	-1.48321	0.0454545	0.44518	1	1184	tags=23%, list=10%, signal=25%
GSE12845_NAIVE_VS_PRE_GC_TONSIL_BCELL_DN	GSE12845_NAIVE_VS_PRE_GC_TONSIL_BCELL_DN		174	-0.354784	-1.48303	0	0.444391	1	4212	tags=51%, list=36%, signal=77%
GOBP_B_CELL_RECEPTOR_SIGNALING_PATHWAY	GOBP_B_CELL_RECEPTOR_SIGNALING_PATHWAY		61	-0.417959	-1.4828	0.039548	0.443754	1	2061	tags=36%, list=17%, signal=43%
GOBP_RESPIRATORY_BURST	GOBP_RESPIRATORY_BURST		24	-0.512558	-1.48233	0.0477327	0.44378	1	409	tags=25%, list=3%, signal=26%
GOBP_MITOTIC_SISTER_CHROMATID_COHESION	GOBP_MITOTIC_SISTER_CHROMATID_COHESION		24	-0.508618	-1.48226	0.0618812	0.442708	1	3798	tags=63%, list=32%, signal=92%
GOBP_ARP2_3_COMPLEX_MEDIATED_ACTIN_NUCLEATION	GOBP_ARP2_3_COMPLEX_MEDIATED_ACTIN_NUCLEATION		31	-0.48179	-1.48197	0.0514706	0.442211	1	2601	tags=42%, list=22%, signal=54%
GOBP_B_CELL_APOPTOTIC_PROCESS	GOBP_B_CELL_APOPTOTIC_PROCESS		22	-0.509836	-1.48193	0.0674699	0.441051	1	1454	tags=32%, list=12%, signal=36%
KEGG_CITRATE_CYCLE_TCA_CYCLE	KEGG_CITRATE_CYCLE_TCA_CYCLE		27	-0.517456	-1.48123	0.0716049	0.441797	1	5142	tags=78%, list=44%, signal=137%
GOCC_TRANSFERASE_COMPLEX_TRANSFERRING_PHOSPHORUS_CONTAINING_GROUPS	GOCC_TRANSFERASE_COMPLEX_TRANSFERRING_PHOSPHORUS_CONTAINING_GROUPS		194	-0.346739	-1.47895	0.00692042	0.446554	1	3675	tags=48%, list=31%, signal=68%
GOBP_REGULATION_OF_MICROTUBULE_BASED_MOVEMENT	GOBP_REGULATION_OF_MICROTUBULE_BASED_MOVEMENT		19	-0.545696	-1.47858	0.0760369	0.446283	1	3170	tags=68%, list=27%, signal=93%
GSE29617_CTRL_VS_DAY3_TIV_FLU_VACCINE_PBMC_2008_DN	GSE29617_CTRL_VS_DAY3_TIV_FLU_VACCINE_PBMC_2008_DN		159	-0.353619	-1.47855	0.00367647	0.44512	1	3766	tags=48%, list=32%, signal=70%
GOBP_HISTONE_EXCHANGE	GOBP_HISTONE_EXCHANGE		31	-0.481439	-1.47821	0.0661578	0.444905	1	4094	tags=58%, list=35%, signal=89%
GSE21360_NAIVE_VS_QUATERNARY_MEMORY_CD8_TCELL_UP	GSE21360_NAIVE_VS_QUATERNARY_MEMORY_CD8_TCELL_UP		173	-0.355353	-1.47773	0.0138889	0.445043	1	3477	tags=45%, list=29%, signal=62%
GSE27786_BCELL_VS_NKCELL_UP	GSE27786_BCELL_VS_NKCELL_UP		163	-0.352878	-1.47751	0.00993378	0.444403	1	3370	tags=37%, list=29%, signal=51%
GSE3565_DUSP1_VS_WT_SPLENOCYTES_POST_LPS_INJECTION_UP	GSE3565_DUSP1_VS_WT_SPLENOCYTES_POST_LPS_INJECTION_UP		131	-0.364758	-1.47562	0.015873	0.448252	1	3757	tags=44%, list=32%, signal=63%
GOCC_H4_HISTONE_ACETYLTRANSFERASE_COMPLEX	GOCC_H4_HISTONE_ACETYLTRANSFERASE_COMPLEX		43	-0.447145	-1.47375	0.0498753	0.452284	1	4769	tags=67%, list=40%, signal=113%
GOBP_PIGMENT_CELL_DIFFERENTIATION	GOBP_PIGMENT_CELL_DIFFERENTIATION		26	-0.502549	-1.47219	0.0854503	0.455323	1	568	tags=23%, list=5%, signal=24%
GOBP_REGULATION_OF_MITOCHONDRIAL_MEMBRANE_PERMEABILITY	GOBP_REGULATION_OF_MITOCHONDRIAL_MEMBRANE_PERMEABILITY		56	-0.424406	-1.4721	0.045584	0.454276	1	2171	tags=34%, list=18%, signal=41%
GOBP_POSITIVE_REGULATION_OF_MEMBRANE_PERMEABILITY	GOBP_POSITIVE_REGULATION_OF_MEMBRANE_PERMEABILITY		51	-0.430572	-1.4721	0.0503979	0.453034	1	2171	tags=39%, list=18%, signal=48%
GOBP_NEGATIVE_REGULATION_OF_TRANSLATIONAL_INITIATION	GOBP_NEGATIVE_REGULATION_OF_TRANSLATIONAL_INITIATION		16	-0.561002	-1.47188	0.0819672	0.452315	1	2708	tags=56%, list=23%, signal=73%
GOBP_TRANSLATIONAL_ELONGATION	GOBP_TRANSLATIONAL_ELONGATION		107	-0.375917	-1.4717	0.003367	0.45153	1	5450	tags=68%, list=46%, signal=126%
GOMF_FOUR_WAY_JUNCTION_DNA_BINDING	GOMF_FOUR_WAY_JUNCTION_DNA_BINDING		15	-0.574876	-1.47086	0.0853933	0.452506	1	4345	tags=73%, list=37%, signal=116%
HP_ABNORMALITY_OF_ADRENAL_PHYSIOLOGY	HP_ABNORMALITY_OF_ADRENAL_PHYSIOLOGY		87	-0.397622	-1.46968	0.0297619	0.454574	1	206	tags=7%, list=2%, signal=7%
SOBOLEV_PBMC_PANDEMRIX_AGE_18_64YO_HIGH_VS_LOW_RESPONDERS_MEDIUM_HIGH_ADVERSE_EVENTS_SCORE_1DY_CORRELATED_WITH_TRANSITIONAL_B_CELLS_UP	SOBOLEV_PBMC_PANDEMRIX_AGE_18_64YO_HIGH_VS_LOW_RESPONDERS_MEDIUM_HIGH_ADVERSE_EVENTS_SCORE_1DY_CORRELATED_WITH_TRANSITIONAL_B_CELLS_UP		18	-0.532414	-1.46923	0.0690476	0.454497	1	736	tags=28%, list=6%, signal=30%
GSE41867_NAIVE_VS_DAY30_LCMV_CLONE13_EXHAUSTED_CD8_TCELL_DN	GSE41867_NAIVE_VS_DAY30_LCMV_CLONE13_EXHAUSTED_CD8_TCELL_DN		172	-0.34556	-1.46852	0	0.455405	1	3173	tags=38%, list=27%, signal=51%
GOMF_BASAL_TRANSCRIPTION_MACHINERY_BINDING	GOMF_BASAL_TRANSCRIPTION_MACHINERY_BINDING		50	-0.431328	-1.46728	0.0381679	0.457631	1	4139	tags=60%, list=35%, signal=92%
KEGG_BASAL_TRANSCRIPTION_FACTORS	KEGG_BASAL_TRANSCRIPTION_FACTORS		26	-0.498697	-1.46553	0.0632319	0.461183	1	2962	tags=54%, list=25%, signal=72%
HP_TETRAPLEGIA	HP_TETRAPLEGIA		21	-0.521605	-1.46522	0.0800971	0.460862	1	920	tags=19%, list=8%, signal=21%
GOBP_DNA_REPLICATION	GOBP_DNA_REPLICATION		243	-0.334358	-1.46461	0.00749064	0.461338	1	2608	tags=37%, list=22%, signal=46%
GOBP_ANTEROGRADE_AXONAL_TRANSPORT	GOBP_ANTEROGRADE_AXONAL_TRANSPORT		39	-0.443809	-1.46365	0.0564516	0.462682	1	1607	tags=33%, list=14%, signal=38%
HP_ABNORMALITY_OF_CIRCULATING_FIBRINOGEN	HP_ABNORMALITY_OF_CIRCULATING_FIBRINOGEN		25	-0.500244	-1.46342	0.0644391	0.462079	1	1000	tags=24%, list=8%, signal=26%
GOBP_NUCLEOSOME_ASSEMBLY	GOBP_NUCLEOSOME_ASSEMBLY		64	-0.413451	-1.46141	0.0509383	0.466663	1	4397	tags=53%, list=37%, signal=84%
GOMF_NUCLEOBASE_CONTAINING_COMPOUND_TRANSMEMBRANE_TRANSPORTER_ACTIVITY	GOMF_NUCLEOBASE_CONTAINING_COMPOUND_TRANSMEMBRANE_TRANSPORTER_ACTIVITY		32	-0.455628	-1.45962	0.0833333	0.470329	1	2521	tags=38%, list=21%, signal=48%
GSE12845_IGD_POS_BLOOD_VS_DARKZONE_GC_TONSIL_BCELL_DN	GSE12845_IGD_POS_BLOOD_VS_DARKZONE_GC_TONSIL_BCELL_DN		168	-0.349893	-1.45873	0.00357143	0.471674	1	4311	tags=48%, list=36%, signal=74%
HP_CONGENITAL_MALFORMATION_OF_THE_RIGHT_HEART	HP_CONGENITAL_MALFORMATION_OF_THE_RIGHT_HEART		41	-0.44379	-1.45832	0.0785908	0.471563	1	585	tags=17%, list=5%, signal=18%
THAKAR_PBMC_INACTIVATED_INFLUENZA_AGE_21_30YO_RESPONDERS_28DY_UP	THAKAR_PBMC_INACTIVATED_INFLUENZA_AGE_21_30YO_RESPONDERS_28DY_UP		352	-0.321223	-1.45787	0	0.471659	1	3307	tags=42%, list=28%, signal=57%
GOBP_ESTABLISHMENT_OF_PROTEIN_LOCALIZATION_TO_MEMBRANE	GOBP_ESTABLISHMENT_OF_PROTEIN_LOCALIZATION_TO_MEMBRANE		230	-0.331444	-1.45733	0.00809717	0.471945	1	1705	tags=24%, list=14%, signal=28%
GOCC_METHYLTRANSFERASE_COMPLEX	GOCC_METHYLTRANSFERASE_COMPLEX		80	-0.397026	-1.45694	0.0266272	0.47173	1	5001	tags=63%, list=42%, signal=108%
GOMF_POSTSYNAPTIC_NEUROTRANSMITTER_RECEPTOR_ACTIVITY	GOMF_POSTSYNAPTIC_NEUROTRANSMITTER_RECEPTOR_ACTIVITY		15	-0.557918	-1.45687	0.0753425	0.470682	1	476	tags=27%, list=4%, signal=28%
GOBP_NUCLEOSIDE_DIPHOSPHATE_METABOLIC_PROCESS	GOBP_NUCLEOSIDE_DIPHOSPHATE_METABOLIC_PROCESS		115	-0.369059	-1.45667	0.0167224	0.470039	1	1852	tags=23%, list=16%, signal=28%
GOBP_RNA_CATABOLIC_PROCESS	GOBP_RNA_CATABOLIC_PROCESS		306	-0.326044	-1.45566	0.00465116	0.471614	1	3529	tags=42%, list=30%, signal=59%
GOBP_REGULATION_OF_TRANSCRIPTION_INVOLVED_IN_G1_S_TRANSITION_OF_MITOTIC_CELL_CYCLE	GOBP_REGULATION_OF_TRANSCRIPTION_INVOLVED_IN_G1_S_TRANSITION_OF_MITOTIC_CELL_CYCLE		26	-0.489247	-1.45552	0.0610687	0.470736	1	2949	tags=38%, list=25%, signal=51%
GOBP_NUCLEOBASE_CONTAINING_SMALL_MOLECULE_CATABOLIC_PROCESS	GOBP_NUCLEOBASE_CONTAINING_SMALL_MOLECULE_CATABOLIC_PROCESS		35	-0.462969	-1.45514	0.0872818	0.470522	1	1671	tags=37%, list=14%, signal=43%
GOBP_CELLULAR_PIGMENTATION	GOBP_CELLULAR_PIGMENTATION		40	-0.453475	-1.45454	0.0577889	0.471063	1	1705	tags=28%, list=14%, signal=32%
GSE18281_MEDULLARY_THYMOCYTE_VS_WHOLE_MEDULLA_THYMUS_DN	GSE18281_MEDULLARY_THYMOCYTE_VS_WHOLE_MEDULLA_THYMUS_DN		139	-0.358294	-1.45292	0.0228758	0.474395	1	3424	tags=42%, list=29%, signal=59%
GOBP_DEVELOPMENTAL_PIGMENTATION	GOBP_DEVELOPMENTAL_PIGMENTATION		30	-0.48379	-1.45242	0.0716113	0.474679	1	811	tags=23%, list=7%, signal=25%
GOBP_CELL_CYCLE_G2_M_PHASE_TRANSITION	GOBP_CELL_CYCLE_G2_M_PHASE_TRANSITION		235	-0.3287	-1.45169	0	0.475679	1	4259	tags=51%, list=36%, signal=79%
GOBP_INTERSTRAND_CROSS_LINK_REPAIR	GOBP_INTERSTRAND_CROSS_LINK_REPAIR		43	-0.447812	-1.45064	0.0536193	0.477432	1	2713	tags=47%, list=23%, signal=60%
GOBP_TRANSCRIPTION_ELONGATION_FROM_RNA_POLYMERASE_II_PROMOTER	GOBP_TRANSCRIPTION_ELONGATION_FROM_RNA_POLYMERASE_II_PROMOTER		72	-0.397968	-1.45054	0.0277778	0.476493	1	3747	tags=46%, list=32%, signal=67%
GOCC_POLYSOMAL_RIBOSOME	GOCC_POLYSOMAL_RIBOSOME		16	-0.536597	-1.45026	0.0681818	0.476061	1	1458	tags=50%, list=12%, signal=57%
GOMF_RNA_HELICASE_ACTIVITY	GOMF_RNA_HELICASE_ACTIVITY		61	-0.409868	-1.45015	0.0338028	0.475141	1	3951	tags=48%, list=33%, signal=71%
GOBP_PROTEIN_AUTOUBIQUITINATION	GOBP_PROTEIN_AUTOUBIQUITINATION		55	-0.418123	-1.4497	0.0520231	0.475212	1	3497	tags=47%, list=30%, signal=67%
GOBP_SECRETION_BY_TISSUE	GOBP_SECRETION_BY_TISSUE		18	-0.533697	-1.44958	0.080786	0.474356	1	1595	tags=39%, list=14%, signal=45%
GSE34156_NOD2_LIGAND_VS_NOD2_AND_TLR1_TLR2_LIGAND_24H_TREATED_MONOCYTE_DN	GSE34156_NOD2_LIGAND_VS_NOD2_AND_TLR1_TLR2_LIGAND_24H_TREATED_MONOCYTE_DN		142	-0.359599	-1.44875	0.0144404	0.475579	1	3691	tags=43%, list=31%, signal=62%
GSE40666_STAT1_KO_VS_STAT4_KO_CD8_TCELL_UP	GSE40666_STAT1_KO_VS_STAT4_KO_CD8_TCELL_UP		164	-0.347488	-1.44854	0.00732601	0.474942	1	2656	tags=31%, list=22%, signal=40%
HP_MITOCHONDRIAL_RESPIRATORY_CHAIN_DEFECTS	HP_MITOCHONDRIAL_RESPIRATORY_CHAIN_DEFECTS		17	-0.535385	-1.44775	0.0769231	0.476109	1	4911	tags=82%, list=42%, signal=141%
GOMF_POTASSIUM_CHANNEL_ACTIVITY	GOMF_POTASSIUM_CHANNEL_ACTIVITY		44	-0.435233	-1.44765	0.0473684	0.475239	1	136	tags=14%, list=1%, signal=14%
GSE10325_LUPUS_BCELL_VS_LUPUS_MYELOID_UP	GSE10325_LUPUS_BCELL_VS_LUPUS_MYELOID_UP		155	-0.347256	-1.44567	0.00952381	0.479723	1	4002	tags=52%, list=34%, signal=77%
GOBP_NUCLEOTIDE_BINDING_DOMAIN_LEUCINE_RICH_REPEAT_CONTAINING_RECEPTOR_SIGNALING_PATHWAY	GOBP_NUCLEOTIDE_BINDING_DOMAIN_LEUCINE_RICH_REPEAT_CONTAINING_RECEPTOR_SIGNALING_PATHWAY		34	-0.454434	-1.44506	0.0684932	0.480348	1	3698	tags=53%, list=31%, signal=77%
HP_CLUBBING	HP_CLUBBING		91	-0.38173	-1.44471	0.021148	0.480238	1	1931	tags=30%, list=16%, signal=35%
GSE25087_TREG_VS_TCONV_ADULT_UP	GSE25087_TREG_VS_TCONV_ADULT_UP		163	-0.353738	-1.44468	0.0171821	0.479156	1	2225	tags=33%, list=19%, signal=40%
HP_ADENOCARCINOMA_OF_THE_LARGE_INTESTINE	HP_ADENOCARCINOMA_OF_THE_LARGE_INTESTINE		19	-0.52566	-1.44391	0.0732861	0.480156	1	1931	tags=53%, list=16%, signal=63%
GOMF_RNA_POLYMERASE_II_GENERAL_TRANSCRIPTION_INITIATION_FACTOR_ACTIVITY	GOMF_RNA_POLYMERASE_II_GENERAL_TRANSCRIPTION_INITIATION_FACTOR_ACTIVITY		31	-0.474799	-1.44366	0.0911392	0.479731	1	2962	tags=52%, list=25%, signal=69%
GSE28737_WT_VS_BCL6_KO_MARGINAL_ZONE_BCELL_DN	GSE28737_WT_VS_BCL6_KO_MARGINAL_ZONE_BCELL_DN		155	-0.351196	-1.44325	0.013289	0.47976	1	3531	tags=43%, list=30%, signal=60%
GSE1460_INTRATHYMIC_T_PROGENITOR_VS_NAIVE_CD4_TCELL_CORD_BLOOD_UP	GSE1460_INTRATHYMIC_T_PROGENITOR_VS_NAIVE_CD4_TCELL_CORD_BLOOD_UP		184	-0.336215	-1.44322	0.00724638	0.478635	1	4236	tags=55%, list=36%, signal=84%
HP_ADRENAL_OVERACTIVITY	HP_ADRENAL_OVERACTIVITY		23	-0.497334	-1.4426	0.0902439	0.479317	1	206	tags=13%, list=2%, signal=13%
HP_ABNORMAL_VENA_CAVA_MORPHOLOGY	HP_ABNORMAL_VENA_CAVA_MORPHOLOGY		31	-0.470898	-1.44195	0.0888889	0.480012	1	585	tags=19%, list=5%, signal=20%
KEGG_OOCYTE_MEIOSIS	KEGG_OOCYTE_MEIOSIS		85	-0.38249	-1.44044	0.0317919	0.483316	1	2900	tags=41%, list=25%, signal=54%
GSE14415_NATURAL_TREG_VS_TCONV_DN	GSE14415_NATURAL_TREG_VS_TCONV_DN		141	-0.353696	-1.43976	0.0190476	0.484128	1	2899	tags=45%, list=25%, signal=59%
GSE37605_TREG_VS_TCONV_C57BL6_FOXP3_FUSION_GFP_UP	GSE37605_TREG_VS_TCONV_C57BL6_FOXP3_FUSION_GFP_UP		69	-0.394299	-1.43894	0.0321543	0.485359	1	834	tags=19%, list=7%, signal=20%
GSE41978_ID2_KO_VS_ID2_KO_AND_BIM_KO_KLRG1_LOW_EFFECTOR_CD8_TCELL_DN	GSE41978_ID2_KO_VS_ID2_KO_AND_BIM_KO_KLRG1_LOW_EFFECTOR_CD8_TCELL_DN		139	-0.354787	-1.43758	0.0157233	0.488194	1	2990	tags=40%, list=25%, signal=52%
HP_ABNORMAL_NASAL_MUCOSA_MORPHOLOGY	HP_ABNORMAL_NASAL_MUCOSA_MORPHOLOGY		29	-0.479757	-1.43752	0.0799032	0.487182	1	585	tags=24%, list=5%, signal=25%
GOMF_PEPTIDE_N_ACETYLTRANSFERASE_ACTIVITY	GOMF_PEPTIDE_N_ACETYLTRANSFERASE_ACTIVITY		42	-0.435967	-1.43655	0.071618	0.488892	1	5157	tags=71%, list=44%, signal=126%
GOBP_NEGATIVE_REGULATION_OF_CHROMOSOME_ORGANIZATION	GOBP_NEGATIVE_REGULATION_OF_CHROMOSOME_ORGANIZATION		77	-0.394131	-1.43593	0.0329341	0.489493	1	4541	tags=60%, list=38%, signal=96%
GOBP_REGULATION_OF_DNA_RECOMBINATION	GOBP_REGULATION_OF_DNA_RECOMBINATION		82	-0.392245	-1.43442	0.0227273	0.49285	1	4510	tags=57%, list=38%, signal=92%
GOBP_GLYCEROLIPID_CATABOLIC_PROCESS	GOBP_GLYCEROLIPID_CATABOLIC_PROCESS		49	-0.426354	-1.43405	0.027027	0.4928	1	257	tags=6%, list=2%, signal=6%
GOBP_PIGMENT_GRANULE_LOCALIZATION	GOBP_PIGMENT_GRANULE_LOCALIZATION		18	-0.522866	-1.43266	0.0864198	0.495592	1	2961	tags=56%, list=25%, signal=74%
GOBP_MATURATION_OF_LSU_RRNA	GOBP_MATURATION_OF_LSU_RRNA		20	-0.512639	-1.43231	0.1	0.495465	1	5200	tags=80%, list=44%, signal=143%
HP_SICK_SINUS_SYNDROME	HP_SICK_SINUS_SYNDROME		17	-0.533451	-1.43142	0.101149	0.496956	1	1291	tags=29%, list=11%, signal=33%
GOBP_CHROMATIN_ASSEMBLY_OR_DISASSEMBLY	GOBP_CHROMATIN_ASSEMBLY_OR_DISASSEMBLY		124	-0.354975	-1.43081	0.0190476	0.497637	1	4010	tags=48%, list=34%, signal=71%
GOCC_CHROMOSOMAL_REGION	GOCC_CHROMOSOMAL_REGION		277	-0.31981	-1.43043	0	0.497543	1	4244	tags=56%, list=36%, signal=86%
GOBP_ESTABLISHMENT_OF_PIGMENT_GRANULE_LOCALIZATION	GOBP_ESTABLISHMENT_OF_PIGMENT_GRANULE_LOCALIZATION		17	-0.533129	-1.42982	0.0831234	0.498097	1	2961	tags=59%, list=25%, signal=78%
GSE12366_GC_VS_MEMORY_BCELL_UP	GSE12366_GC_VS_MEMORY_BCELL_UP		167	-0.341895	-1.42972	0.0184502	0.497169	1	2500	tags=34%, list=21%, signal=42%
GOMF_CATALYTIC_ACTIVITY_ACTING_ON_A_TRNA	GOMF_CATALYTIC_ACTIVITY_ACTING_ON_A_TRNA		108	-0.371884	-1.42899	0.0341615	0.498132	1	4469	tags=52%, list=38%, signal=83%
GOCC_PRESYNAPTIC_MEMBRANE	GOCC_PRESYNAPTIC_MEMBRANE		73	-0.391176	-1.42855	0.0375723	0.49827	1	809	tags=16%, list=7%, signal=18%
GSE24634_NAIVE_CD4_TCELL_VS_DAY5_IL4_CONV_TREG_DN	GSE24634_NAIVE_CD4_TCELL_VS_DAY5_IL4_CONV_TREG_DN		175	-0.333501	-1.42845	0.00729927	0.497389	1	3797	tags=43%, list=32%, signal=62%
NAKAYA_PBMC_FLUARIX_FLUVIRIN_AGE_18_50YO_CORRELATED_WITH_HAI_28DY_RESPONSE_AT_7DY_NEGATIVE	NAKAYA_PBMC_FLUARIX_FLUVIRIN_AGE_18_50YO_CORRELATED_WITH_HAI_28DY_RESPONSE_AT_7DY_NEGATIVE		405	-0.309076	-1.42821	0	0.496963	1	3174	tags=39%, list=27%, signal=51%
HP_INFERTILITY	HP_INFERTILITY		81	-0.382034	-1.42719	0.0301205	0.498865	1	585	tags=15%, list=5%, signal=15%
GOBP_NEGATIVE_REGULATION_OF_LYMPHOCYTE_MEDIATED_IMMUNITY	GOBP_NEGATIVE_REGULATION_OF_LYMPHOCYTE_MEDIATED_IMMUNITY		26	-0.486042	-1.42697	0.0790123	0.498385	1	1831	tags=38%, list=15%, signal=45%
KEGG_ANTIGEN_PROCESSING_AND_PRESENTATION	KEGG_ANTIGEN_PROCESSING_AND_PRESENTATION		36	-0.436781	-1.42655	0.0787402	0.498554	1	1089	tags=22%, list=9%, signal=24%
GOBP_REGULATION_OF_LYMPHOCYTE_MEDIATED_IMMUNITY	GOBP_REGULATION_OF_LYMPHOCYTE_MEDIATED_IMMUNITY		109	-0.359563	-1.4259	0.0116959	0.499271	1	1941	tags=28%, list=16%, signal=34%
HP_APLASIA_HYPOPLASIA_OF_THE_UVULA	HP_APLASIA_HYPOPLASIA_OF_THE_UVULA		23	-0.48554	-1.4233	0.105263	0.505882	1	1868	tags=52%, list=16%, signal=62%
GOBP_MRNA_EXPORT_FROM_NUCLEUS	GOBP_MRNA_EXPORT_FROM_NUCLEUS		88	-0.377413	-1.4232	0.0325444	0.505012	1	4698	tags=55%, list=40%, signal=90%
HP_APLASIA_HYPOPLASIA_OF_THE_SPLEEN	HP_APLASIA_HYPOPLASIA_OF_THE_SPLEEN		45	-0.425392	-1.42262	0.0508475	0.505516	1	585	tags=16%, list=5%, signal=16%
GAUCHER_PBMC_YF_VAX_STAMARIL_UNKNOWN_AGE_3DY_DN	GAUCHER_PBMC_YF_VAX_STAMARIL_UNKNOWN_AGE_3DY_DN		81	-0.390669	-1.42261	0.0591549	0.504407	1	1882	tags=36%, list=16%, signal=42%
GOCC_CILIARY_PLASM	GOCC_CILIARY_PLASM		72	-0.392107	-1.42258	0.0552486	0.503333	1	585	tags=14%, list=5%, signal=15%
GOCC_SAGA_TYPE_COMPLEX	GOCC_SAGA_TYPE_COMPLEX		23	-0.493369	-1.42255	0.0793269	0.502279	1	3124	tags=48%, list=26%, signal=65%
GOBP_POSITIVE_REGULATION_OF_CHROMOSOME_SEPARATION	GOBP_POSITIVE_REGULATION_OF_CHROMOSOME_SEPARATION		15	-0.55358	-1.42253	0.0909091	0.50118	1	4928	tags=87%, list=42%, signal=149%
HP_URETHRAL_ATRESIA	HP_URETHRAL_ATRESIA		17	-0.529941	-1.42185	0.0942928	0.502072	1	386	tags=18%, list=3%, signal=18%
GSE13485_DAY1_VS_DAY3_YF17D_VACCINE_PBMC_DN	GSE13485_DAY1_VS_DAY3_YF17D_VACCINE_PBMC_DN		168	-0.344556	-1.42124	0.00692042	0.502773	1	4596	tags=54%, list=39%, signal=86%
GSE29618_PRE_VS_DAY7_POST_LAIV_FLU_VACCINE_PDC_DN	GSE29618_PRE_VS_DAY7_POST_LAIV_FLU_VACCINE_PDC_DN		172	-0.343378	-1.42122	0.0140845	0.501716	1	3704	tags=46%, list=31%, signal=66%
KEGG_ALDOSTERONE_REGULATED_SODIUM_REABSORPTION	KEGG_ALDOSTERONE_REGULATED_SODIUM_REABSORPTION		31	-0.455831	-1.42008	0.078125	0.50412	1	876	tags=23%, list=7%, signal=24%
GSE12845_IGD_POS_BLOOD_VS_PRE_GC_TONSIL_BCELL_DN	GSE12845_IGD_POS_BLOOD_VS_PRE_GC_TONSIL_BCELL_DN		177	-0.341162	-1.41992	0.0138889	0.503512	1	2900	tags=36%, list=25%, signal=46%
GOBP_DEMETHYLATION	GOBP_DEMETHYLATION		47	-0.427504	-1.41979	0.0777202	0.502752	1	1967	tags=19%, list=17%, signal=23%
GOMF_METAL_ION_TRANSMEMBRANE_TRANSPORTER_ACTIVITY	GOMF_METAL_ION_TRANSMEMBRANE_TRANSPORTER_ACTIVITY		206	-0.332969	-1.41964	0.0037594	0.502071	1	590	tags=12%, list=5%, signal=12%
GSE7568_IL4_TGFB_DEXAMETHASONE_VS_IL4_TGFB_TREATED_MACROPHAGE_UP	GSE7568_IL4_TGFB_DEXAMETHASONE_VS_IL4_TGFB_TREATED_MACROPHAGE_UP		146	-0.347476	-1.4192	0.0136986	0.50226	1	3658	tags=40%, list=31%, signal=58%
GSE7568_IL4_VS_IL4_AND_DEXAMETHASONE_TREATED_MACROPHAGE_UP	GSE7568_IL4_VS_IL4_AND_DEXAMETHASONE_TREATED_MACROPHAGE_UP		139	-0.354594	-1.41904	0.0160256	0.501559	1	4208	tags=52%, list=36%, signal=80%
GOBP_POSITIVE_REGULATION_OF_NITRIC_OXIDE_SYNTHASE_ACTIVITY	GOBP_POSITIVE_REGULATION_OF_NITRIC_OXIDE_SYNTHASE_ACTIVITY		17	-0.529134	-1.41853	0.107759	0.501963	1	654	tags=18%, list=6%, signal=19%
GOMF_PEPTIDE_RECEPTOR_ACTIVITY	GOMF_PEPTIDE_RECEPTOR_ACTIVITY		60	-0.404647	-1.41755	0.0661376	0.503899	1	759	tags=27%, list=6%, signal=28%
GOBP_POSITIVE_REGULATION_OF_TELOMERE_MAINTENANCE_VIA_TELOMERE_LENGTHENING	GOBP_POSITIVE_REGULATION_OF_TELOMERE_MAINTENANCE_VIA_TELOMERE_LENGTHENING		32	-0.46941	-1.41728	0.0951219	0.503593	1	3449	tags=50%, list=29%, signal=70%
GSE33292_WT_VS_TCF1_KO_DN3_THYMOCYTE_DN	GSE33292_WT_VS_TCF1_KO_DN3_THYMOCYTE_DN		168	-0.337363	-1.41477	0.00682594	0.509933	1	2593	tags=35%, list=22%, signal=44%
GOBP_REGULATION_OF_MITOTIC_SISTER_CHROMATID_SEGREGATION	GOBP_REGULATION_OF_MITOTIC_SISTER_CHROMATID_SEGREGATION		39	-0.436211	-1.41429	0.0697674	0.510283	1	4541	tags=62%, list=38%, signal=100%
GOMF_PEPTIDE_LYSINE_N_ACETYLTRANSFERASE_ACTIVITY	GOMF_PEPTIDE_LYSINE_N_ACETYLTRANSFERASE_ACTIVITY		36	-0.448175	-1.41318	0.0749354	0.51254	1	5157	tags=69%, list=44%, signal=123%
GOMF_SOLUTE_CATION_SYMPORTER_ACTIVITY	GOMF_SOLUTE_CATION_SYMPORTER_ACTIVITY		45	-0.429023	-1.41316	0.0682415	0.511479	1	1688	tags=29%, list=14%, signal=34%
GOBP_PROTEIN_LOCALIZATION_TO_CHROMOSOME_TELOMERIC_REGION	GOBP_PROTEIN_LOCALIZATION_TO_CHROMOSOME_TELOMERIC_REGION		27	-0.473815	-1.41162	0.0700483	0.515068	1	3742	tags=59%, list=32%, signal=87%
GOBP_NADPH_REGENERATION	GOBP_NADPH_REGENERATION		15	-0.53136	-1.41077	0.106754	0.51667	1	1459	tags=33%, list=12%, signal=38%
GOBP_NUCLEOTIDE_EXCISION_REPAIR_DNA_DAMAGE_RECOGNITION	GOBP_NUCLEOTIDE_EXCISION_REPAIR_DNA_DAMAGE_RECOGNITION		17	-0.534994	-1.41057	0.115108	0.516113	1	4608	tags=71%, list=39%, signal=116%
GOBP_RRNA_METABOLIC_PROCESS	GOBP_RRNA_METABOLIC_PROCESS		194	-0.330024	-1.40992	0.0142349	0.516909	1	4325	tags=46%, list=37%, signal=71%
GSE19512_NAUTRAL_VS_INDUCED_TREG_UP	GSE19512_NAUTRAL_VS_INDUCED_TREG_UP		106	-0.365124	-1.4098	0.0415335	0.516173	1	854	tags=16%, list=7%, signal=17%
GOBP_POSITIVE_REGULATION_OF_CELL_CYCLE_G2_M_PHASE_TRANSITION	GOBP_POSITIVE_REGULATION_OF_CELL_CYCLE_G2_M_PHASE_TRANSITION		27	-0.470906	-1.40974	0.104278	0.515222	1	3115	tags=48%, list=26%, signal=65%
GOBP_P_BODY_ASSEMBLY	GOBP_P_BODY_ASSEMBLY		18	-0.519079	-1.40934	0.114416	0.515273	1	5050	tags=83%, list=43%, signal=145%
GSE13485_DAY1_VS_DAY21_YF17D_VACCINE_PBMC_DN	GSE13485_DAY1_VS_DAY21_YF17D_VACCINE_PBMC_DN		159	-0.340631	-1.40892	0.0144928	0.515354	1	3979	tags=49%, list=34%, signal=73%
GSE24634_IL4_VS_CTRL_TREATED_NAIVE_CD4_TCELL_DAY7_UP	GSE24634_IL4_VS_CTRL_TREATED_NAIVE_CD4_TCELL_DAY7_UP		162	-0.336693	-1.40863	0.010274	0.515152	1	3028	tags=39%, list=26%, signal=52%
GSE31082_DP_VS_CD4_SP_THYMOCYTE_UP	GSE31082_DP_VS_CD4_SP_THYMOCYTE_UP		157	-0.33908	-1.40861	0.00684931	0.514101	1	2925	tags=37%, list=25%, signal=48%
GOBP_MRNA_3_END_PROCESSING	GOBP_MRNA_3_END_PROCESSING		81	-0.385204	-1.40845	0.0438597	0.513455	1	4773	tags=63%, list=40%, signal=105%
GOBP_SNRNA_METABOLIC_PROCESS	GOBP_SNRNA_METABOLIC_PROCESS		35	-0.448164	-1.40817	0.0773067	0.513234	1	3658	tags=43%, list=31%, signal=62%
GSE5503_LIVER_DC_VS_PLN_DC_ACTIVATED_ALLOGENIC_TCELL_DN	GSE5503_LIVER_DC_VS_PLN_DC_ACTIVATED_ALLOGENIC_TCELL_DN		170	-0.335542	-1.4078	0.0321429	0.513299	1	2818	tags=35%, list=24%, signal=46%
GOBP_MICROTUBULE_BUNDLE_FORMATION	GOBP_MICROTUBULE_BUNDLE_FORMATION		66	-0.395497	-1.40779	0.0569801	0.512238	1	585	tags=18%, list=5%, signal=19%
HP_ABNORMAL_METABOLISM	HP_ABNORMAL_METABOLISM		92	-0.371135	-1.40703	0.0425532	0.513375	1	2228	tags=30%, list=19%, signal=37%
GSE7764_IL15_TREATED_VS_CTRL_NK_CELL_24H_UP	GSE7764_IL15_TREATED_VS_CTRL_NK_CELL_24H_UP		178	-0.338227	-1.40664	0.0145985	0.513382	1	4109	tags=49%, list=35%, signal=75%
GSE34156_NOD2_LIGAND_VS_NOD2_AND_TLR1_TLR2_LIGAND_6H_TREATED_MONOCYTE_UP	GSE34156_NOD2_LIGAND_VS_NOD2_AND_TLR1_TLR2_LIGAND_6H_TREATED_MONOCYTE_UP		141	-0.344437	-1.40611	0.0301003	0.513965	1	3453	tags=43%, list=29%, signal=60%
GSE3920_UNTREATED_VS_IFNB_TREATED_ENDOTHELIAL_CELL_DN	GSE3920_UNTREATED_VS_IFNB_TREATED_ENDOTHELIAL_CELL_DN		153	-0.338685	-1.40593	0.0137457	0.51343	1	4149	tags=47%, list=35%, signal=72%
GOBP_SENSORY_PERCEPTION_OF_MECHANICAL_STIMULUS	GOBP_SENSORY_PERCEPTION_OF_MECHANICAL_STIMULUS		94	-0.370659	-1.40523	0.0350318	0.514351	1	433	tags=14%, list=4%, signal=14%
GOCC_PROTEIN_KINASE_COMPLEX	GOCC_PROTEIN_KINASE_COMPLEX		81	-0.377719	-1.40506	0.052795	0.513752	1	3290	tags=47%, list=28%, signal=65%
GOBP_REGULATION_OF_NMDA_RECEPTOR_ACTIVITY	GOBP_REGULATION_OF_NMDA_RECEPTOR_ACTIVITY		24	-0.486489	-1.40468	0.0954654	0.513764	1	637	tags=33%, list=5%, signal=35%
GSE21546_ELK1_KO_VS_SAP1A_KO_AND_ELK1_KO_DP_THYMOCYTES_DN	GSE21546_ELK1_KO_VS_SAP1A_KO_AND_ELK1_KO_DP_THYMOCYTES_DN		167	-0.337395	-1.40437	0.0143885	0.513544	1	4050	tags=49%, list=34%, signal=74%
HP_ABNORMAL_SPERM_MOTILITY	HP_ABNORMAL_SPERM_MOTILITY		32	-0.455451	-1.40415	0.0771144	0.513179	1	585	tags=22%, list=5%, signal=23%
GSE3720_UNSTIM_VS_PMA_STIM_VD2_GAMMADELTA_TCELL_UP	GSE3720_UNSTIM_VS_PMA_STIM_VD2_GAMMADELTA_TCELL_UP		139	-0.346569	-1.40366	0.0348432	0.513573	1	1531	tags=23%, list=13%, signal=26%
GOBP_MAGNESIUM_ION_TRANSPORT	GOBP_MAGNESIUM_ION_TRANSPORT		15	-0.549724	-1.40352	0.100446	0.512942	1	2367	tags=33%, list=20%, signal=42%
PTEN_DN.V1_UP	PTEN_DN.V1_UP		106	-0.35625	-1.40317	0.0213415	0.512946	1	537	tags=13%, list=5%, signal=14%
GOMF_NUCLEAR_IMPORT_SIGNAL_RECEPTOR_ACTIVITY	GOMF_NUCLEAR_IMPORT_SIGNAL_RECEPTOR_ACTIVITY		18	-0.522855	-1.40301	0.106635	0.512352	1	3994	tags=67%, list=34%, signal=101%
HP_INCREASED_MEAN_CORPUSCULAR_VOLUME	HP_INCREASED_MEAN_CORPUSCULAR_VOLUME		25	-0.473195	-1.40265	0.093199	0.512452	1	2195	tags=44%, list=19%, signal=54%
GOBP_NCRNA_METABOLIC_PROCESS	GOBP_NCRNA_METABOLIC_PROCESS		402	-0.300185	-1.40219	0	0.512716	1	3736	tags=40%, list=32%, signal=56%
GOCC_RNA_POLYMERASE_COMPLEX	GOCC_RNA_POLYMERASE_COMPLEX		83	-0.375968	-1.4021	0.0489914	0.511976	1	4035	tags=57%, list=34%, signal=85%
GOBP_DNA_TEMPLATED_TRANSCRIPTION_ELONGATION	GOBP_DNA_TEMPLATED_TRANSCRIPTION_ELONGATION		95	-0.371514	-1.4017	0.0470588	0.512022	1	5381	tags=66%, list=46%, signal=121%
GOBP_O_GLYCAN_PROCESSING	GOBP_O_GLYCAN_PROCESSING		34	-0.459043	-1.40135	0.0916031	0.512051	1	200	tags=12%, list=2%, signal=12%
GSE5503_MLN_DC_VS_SPLEEN_DC_ACTIVATED_ALLOGENIC_TCELL_DN	GSE5503_MLN_DC_VS_SPLEEN_DC_ACTIVATED_ALLOGENIC_TCELL_DN		162	-0.338399	-1.40121	0.018315	0.511413	1	3863	tags=52%, list=33%, signal=77%
GSE2405_0H_VS_24H_A_PHAGOCYTOPHILUM_STIM_NEUTROPHIL_UP	GSE2405_0H_VS_24H_A_PHAGOCYTOPHILUM_STIM_NEUTROPHIL_UP		133	-0.34247	-1.39962	0.0193548	0.515293	1	3085	tags=40%, list=26%, signal=53%
HP_WIDE_INTERMAMILLARY_DISTANCE	HP_WIDE_INTERMAMILLARY_DISTANCE		78	-0.376472	-1.39962	0.0447761	0.514257	1	3928	tags=49%, list=33%, signal=73%
GOBP_OOCYTE_DIFFERENTIATION	GOBP_OOCYTE_DIFFERENTIATION		29	-0.478917	-1.39917	0.0978836	0.514527	1	204	tags=10%, list=2%, signal=11%
GSE33425_CD161_HIGH_VS_INT_CD8_TCELL_UP	GSE33425_CD161_HIGH_VS_INT_CD8_TCELL_UP		172	-0.337603	-1.39903	0.0248227	0.513854	1	2377	tags=30%, list=20%, signal=37%
HP_RECURRENT_MYCOBACTERIAL_INFECTIONS	HP_RECURRENT_MYCOBACTERIAL_INFECTIONS		30	-0.459579	-1.39877	0.0949868	0.513653	1	742	tags=23%, list=6%, signal=25%
HP_NASAL_OBSTRUCTION	HP_NASAL_OBSTRUCTION		26	-0.471422	-1.39755	0.0919037	0.516407	1	585	tags=23%, list=5%, signal=24%
GSE13547_CTRL_VS_ANTI_IGM_STIM_BCELL_2H_UP	GSE13547_CTRL_VS_ANTI_IGM_STIM_BCELL_2H_UP		160	-0.337216	-1.39752	0.0113636	0.515452	1	3758	tags=55%, list=32%, signal=80%
HP_ACUTE_KIDNEY_INJURY	HP_ACUTE_KIDNEY_INJURY		16	-0.526197	-1.39652	0.115207	0.517514	1	111	tags=13%, list=1%, signal=13%
HP_BONE_MARROW_HYPERCELLULARITY	HP_BONE_MARROW_HYPERCELLULARITY		22	-0.490291	-1.39636	0.100478	0.516963	1	1444	tags=32%, list=12%, signal=36%
GSE12366_GC_BCELL_VS_PLASMA_CELL_UP	GSE12366_GC_BCELL_VS_PLASMA_CELL_UP		160	-0.341636	-1.39561	0.010101	0.518277	1	4154	tags=51%, list=35%, signal=77%
GOMF_LIGAND_GATED_CALCIUM_CHANNEL_ACTIVITY	GOMF_LIGAND_GATED_CALCIUM_CHANNEL_ACTIVITY		18	-0.516859	-1.39542	0.123457	0.517786	1	517	tags=17%, list=4%, signal=17%
GOBP_CYTOPLASMIC_PATTERN_RECOGNITION_RECEPTOR_SIGNALING_PATHWAY	GOBP_CYTOPLASMIC_PATTERN_RECOGNITION_RECEPTOR_SIGNALING_PATHWAY		59	-0.399923	-1.39453	0.0668449	0.519471	1	3954	tags=49%, list=33%, signal=74%
GSE37416_CTRL_VS_6H_F_TULARENSIS_LVS_NEUTROPHIL_UP	GSE37416_CTRL_VS_6H_F_TULARENSIS_LVS_NEUTROPHIL_UP		163	-0.33108	-1.39409	0.0172414	0.519777	1	3897	tags=43%, list=33%, signal=63%
GOMF_PROTON_CHANNEL_ACTIVITY	GOMF_PROTON_CHANNEL_ACTIVITY		17	-0.531467	-1.3935	0.102041	0.520537	1	2662	tags=53%, list=23%, signal=68%
GOBP_TRIGLYCERIDE_METABOLIC_PROCESS	GOBP_TRIGLYCERIDE_METABOLIC_PROCESS		65	-0.399437	-1.39345	0.047486	0.519631	1	361	tags=6%, list=3%, signal=6%
HP_MALE_INFERTILITY	HP_MALE_INFERTILITY		46	-0.42274	-1.3934	0.0725806	0.518791	1	585	tags=17%, list=5%, signal=18%
GSE29164_UNTREATED_VS_CD8_TCELL_AND_IL12_TREATED_MELANOMA_DAY7_UP	GSE29164_UNTREATED_VS_CD8_TCELL_AND_IL12_TREATED_MELANOMA_DAY7_UP		172	-0.33319	-1.39324	0.0138889	0.518286	1	3491	tags=45%, list=30%, signal=63%
HP_IMPAIRED_SMOOTH_PURSUIT	HP_IMPAIRED_SMOOTH_PURSUIT		28	-0.467211	-1.39283	0.0951157	0.518533	1	3975	tags=61%, list=34%, signal=91%
GOBP_RIBONUCLEOSIDE_MONOPHOSPHATE_BIOSYNTHETIC_PROCESS	GOBP_RIBONUCLEOSIDE_MONOPHOSPHATE_BIOSYNTHETIC_PROCESS		23	-0.468163	-1.39266	0.0800915	0.517989	1	3051	tags=43%, list=26%, signal=59%
KEGG_NUCLEOTIDE_EXCISION_REPAIR	KEGG_NUCLEOTIDE_EXCISION_REPAIR		38	-0.432359	-1.39253	0.10101	0.517453	1	2804	tags=45%, list=24%, signal=58%
GOBP_TELOMERE_CAPPING	GOBP_TELOMERE_CAPPING		35	-0.4419	-1.39235	0.0955882	0.516985	1	3401	tags=49%, list=29%, signal=68%
GOMF_CYSTEINE_TYPE_ENDOPEPTIDASE_INHIBITOR_ACTIVITY	GOMF_CYSTEINE_TYPE_ENDOPEPTIDASE_INHIBITOR_ACTIVITY		23	-0.483563	-1.39218	0.10514	0.516443	1	1000	tags=17%, list=8%, signal=19%
GOBP_CELL_CYCLE_DNA_REPLICATION	GOBP_CELL_CYCLE_DNA_REPLICATION		55	-0.403868	-1.39182	0.0805556	0.516545	1	3647	tags=53%, list=31%, signal=76%
GOMF_TRANSLATION_REGULATOR_ACTIVITY	GOMF_TRANSLATION_REGULATOR_ACTIVITY		105	-0.354012	-1.39168	0.0341615	0.515955	1	4175	tags=55%, list=35%, signal=85%
GOBP_PIGMENTATION	GOBP_PIGMENTATION		65	-0.386963	-1.39078	0.0518293	0.517681	1	1705	tags=25%, list=14%, signal=29%
GSE6259_33D1_POS_VS_DEC205_POS_SPLENIC_DC_UP	GSE6259_33D1_POS_VS_DEC205_POS_SPLENIC_DC_UP		145	-0.341607	-1.39072	0.0180505	0.516869	1	2317	tags=30%, list=20%, signal=37%
GOBP_NEGATIVE_REGULATION_OF_NUCLEAR_DIVISION	GOBP_NEGATIVE_REGULATION_OF_NUCLEAR_DIVISION		48	-0.429433	-1.39059	0.0566038	0.516252	1	2262	tags=35%, list=19%, signal=44%
HP_FRECKLING	HP_FRECKLING		35	-0.428829	-1.39058	0.0837696	0.515319	1	2542	tags=37%, list=22%, signal=47%
GOCC_NUCLEAR_CHROMOSOME	GOCC_NUCLEAR_CHROMOSOME		178	-0.333984	-1.39052	0.0113636	0.514526	1	2471	tags=39%, list=21%, signal=49%
GOBP_POSITIVE_REGULATION_OF_RESPONSE_TO_BIOTIC_STIMULUS	GOBP_POSITIVE_REGULATION_OF_RESPONSE_TO_BIOTIC_STIMULUS		171	-0.333393	-1.38965	0.0144404	0.51614	1	2117	tags=23%, list=18%, signal=28%
[truncated: 4,033 more rows]
