# Supplementary material for: The genomic landscape of canine diffuse large B-cell lymphoma identifies distinct subtypes with clinical and therapeutic implications
Source: Research Square preprint supplement (doi:10.21203/rs.3.rs-916612/v1), 2021-09-21
Supplement: Supplementary file 17 [file 71e63b3378e18d2b84cd6934.xlsx]

## Sheet: Index
Supplementary Data 4: Variants' filtering for known cancer genes (COSMIC) and genes reported in human DLBCL (hDLBCL).

## Sheet: COSMIC genes
Genes reported in COSMIC database	N. of mutated cases
SETD2	24
POT1	22
TP53	19
MYC	16
FBXW7	15
DDX3X	13
TBL1XR1	13
RARA	6
CIC	6
LRP1B	6
TRRAP	4
KDM6A	4
SUZ12	4
ETV1	4
NCOR2	3
PTEN	3
CSMD3	3
PALB2	3
PTCH1	3
PTPRD	3
NSD3	3
ELL	3
FAT3	3
PPP6C	3
AFDN	2
RPN1	2
MB21D2	2
PTPRK	2
CCND3	2
CTNNA2	2
EZH2	2
DICER1	2
ARID1A	2
RBM15	2
CNTRL	2
SFPQ	2
MYH9	2
ZNRF3	2
TSC2	2
CCR7	2
EP300	2
CTNND1	2
MED12	2
CREBBP	2
NBEA	2
PIM1	2
CASP8	2
IRS4	2
NBN	2
HNRNPA2B1	2
POLD1	2
TET2	2
N4BP2	1
CDH10	1
MSH2	1
MITF	1
NFKB2	1
BRCA1	1
CLTC	1
NOTCH1	1
BAZ1A	1
CDH1	1
EPHA7	1
NUMA1	1
ATR	1
QKI	1
STAG1	1
ASXL1	1
ESR1	1
TAF15	1
KMT2C	1
HNF1A	1
GPC5	1
POU2AF1	1
NUP214	1
ACSL6	1
RET	1
PREX2	1
ABI1	1
MLLT10	1
ID3	1
FLT4	1
HOXA13	1
XPC	1
MYH11	1
PTPRC	1
KLK2	1
FGFR2	1
GAS7	1
RMI2	1
KIT	1
PIK3R1	1
CTNNB1	1
MACC1	1
MYO5A	1
MAF	1
AR	1
FAM135B	1
MTOR	1
SLC34A2	1
IKZF1	1
ROBO2	1
AFF1	1
SMAD2	1
IKBKB	1
CBLB	1
BCL11B	1
ATRX	1
JAK1	1
IL21R	1
BCR	1
MAP3K13	1
BIRC6	1
RNF213	1
ZFHX3	1
TNFAIP3	1
ACVR1	1
NF2	1
FGFR4	1
CRTC3	1
SDHAF2	1
POLG	1
POLQ	1
FANCA	1
DCC	1
WNK2	1
GLI1	1
PTPRB	1
MRTFA	1
CSF3R	1
KAT6A	1
MLLT1	1
PATZ1	1
CLTCL1	1
ETV5	1
COL3A1	1
PRF1	1
ZBTB16	1
PRDM16	1
BIRC3	1
STIL	1
EPAS1	1
FOXO1	1
PTPN13	1
MYB	1
NSD2	1
DDX6	1
ARNT	1
COL2A1	1
SDHC	1
ELF4	1
ARID1B	1
LRIG3	1
RSPO2	1
JAZF1	1
FGFR1	1
IL6ST	1
FBLN2	1
BAP1	1
EWSR1	1
RUNX1	1
BTK	1
BCORL1	1
GPC3	1
ELK4	1
ERBB3	1
ITGAV	1
BCL9L	1
SRSF2	1
ATM	1
CDK12	1
CACNA1D	1

## Sheet: hDLBCL genes
Genes mutated in hDLBCL	N. of mutated cases
TRAF3	41
SETD2	24
POT1	22
TP53	19
MYC	16
FBXW7	15
DDX3X	13
TBL1XR1	13
ABCA13	8
TTN	6
RARA	6
CIC	6
LRP1B	6
PIK3CD	6
GBE1	5
DIAPH2	5
EHD3	5
FAM50A	5
VWF	5
TRRAP	4
HIVEP3	4
MYT1L	4
KDM6A	4
LAMA1	4
ANKRD11	4
PLEC	4
TLR5	4
MEF2C	4
SYNE2	4
SYNE1	4
KIF21A	4
ATXN1	4
LRRN3	4
SUZ12	4
LRRIQ1	4
ETV1	4
FSIP2	4
SEMA6A	3
LRAT	3
CARMIL1	3
SLC8A1	3
SORCS1	3
PIGQ	3
NBEAL2	3
BPTF	3
NR1H3	3
NCOR2	3
PTEN	3
ADAMTSL1	3
CLCN5	3
NEFM	3
FBN1	3
CSMD3	3
PALB2	3
SBF1	3
MAGI1	3
PREX1	3
PTCH1	3
MANBA	3
MYH13	3
PTPRD	3
TACC2	3
SEMA5A	3
CTNNA3	3
BIRC2	3
AMZ1	3
MED13	3
LAMA2	3
NSD3	3
PCDHGC3	3
PCNX4	3
KALRN	3
ZNF804B	3
GREB1L	3
WDFY3	3
CELSR1	3
LRP2	3
COL11A1	3
RYR1	3
NFASC	3
PRAG1	3
DMD	3
NCAN	3
ELL	3
DNAH8	3
CTTNBP2	3
FAT3	3
CD83	3
FHOD3	3
HSPG2	3
BAZ2A	3
MUC5B	3
NEBL	3
TRAF2	3
ADGRL3	3
TIAM1	3
DNAH11	2
MRPS5	2
APBB1IP	2
PLXNA1	2
RPH3A	2
SCARF2	2
ADD2	2
LARS2	2
KLHL1	2
SLIT2	2
ACTN2	2
AFDN	2
ARHGAP35	2
STAT2	2
APOB	2
RPN1	2
TSHZ2	2
HNRNPA1	2
MYBL1	2
MB21D2	2
OTOGL	2
CROCC	2
SLC5A12	2
SOX18	2
ADAMTSL3	2
NQO1	2
DPYD	2
PTPRK	2
TGFB1	2
PAK4	2
MYRFL	2
SVIL	2
CPAMD8	2
TNS2	2
FAM234A	2
PTCHD1	2
ZNF862	2
POLRMT	2
THSD1	2
RNF17	2
IL1RL2	2
KDM3B	2
FSTL5	2
ICAM5	2
USH2A	2
MYH3	2
POU2F1	2
PTPRM	2
ACIN1	2
SETX	2
DMXL2	2
KLHL34	2
IL1RL1	2
CCND3	2
TH	2
FERMT3	2
ITPR1	2
EYA1	2
ZFHX4	2
TMPRSS7	2
MYH10	2
GABRA3	2
CTNNA2	2
AKAP13	2
NLRP3	2
FANCM	2
UNC93B1	2
SPOCK3	2
EZH2	2
IRF2BP2	2
BAHCC1	2
PXDN	2
UBR4	2
MYO7A	2
IQSEC3	2
LYST	2
PARP1	2
DICER1	2
CDH20	2
IPO7	2
RPS6KA6	2
ZNF628	2
ARID1A	2
DNAH12	2
ADCY6	2
PLCL1	2
CDH8	2
ACE	2
MICAL2	2
TSC22D2	2
BPIFB4	2
MGA	2
ATG2B	2
DNAJC5G	2
INCENP	2
LAPTM5	2
NISCH	2
KIAA1671	2
CABIN1	2
RBM15	2
CAMSAP2	2
FBN2	2
ARHGEF5	2
SEMA3C	2
BDP1	2
PGR	2
DMBT1	2
INTS1	2
SUPT6H	2
CSMD1	2
ZNF687	2
CCDC191	2
CACNA1H	2
ASPHD2	2
SRGAP1	2
CNTRL	2
SIK3	2
COL4A6	2
KCND3	2
ACACB	2
USP32	2
PCDH10	2
NEB	2
GAD2	2
FN1	2
SYMPK	2
EPHA5	2
COL6A3	2
TLN2	2
SH3TC2	2
ZNF865	2
ZNF618	2
MYO18B	2
PCNT	2
ATP1A4	2
CFP	2
MYH9	2
BICRAL	2
MAK16	2
ZNRF3	2
SLCO3A1	2
CEMIP	2
TSC2	2
CCR7	2
BCAT2	2
EP300	2
SYT12	2
INTU	2
CFAP46	2
NCAM2	2
MPDZ	2
LRIG2	2
CTNND1	2
DOCK3	2
CECR2	2
USP31	2
SEMA6C	2
NCKAP5	2
TRANK1	2
PKHD1L1	2
ARHGAP32	2
QRICH2	2
MED12	2
TNFRSF1A	2
MAP2K6	2
ENTPD2	2
CCDC138	2
ANKHD1	2
ANKLE1	2
GOLGA3	2
PXDNL	2
ROBO1	2
PDE9A	2
CNKSR3	2
JAG1	2
ROBO3	2
PPFIA3	2
MYO9B	2
GBA3	2
MYH1	2
CILP2	2
FAM171B	2
CREBBP	2
NBEA	2
MAN2A2	2
PELP1	2
DIP2B	2
MAP3K20	2
SPEG	2
IL12RB2	2
CACHD1	2
KATNAL1	2
TTC33	2
RERE	2
HCRTR2	2
DMAP1	2
SI	2
KIF13A	2
KIAA2012	2
KCNMA1	2
HIC1	2
ARHGAP12	2
NEFL	2
TGM7	2
MYO10	2
OGT	2
RPS6KA2	2
TBK1	2
NEIL3	2
CTBP2	2
DNAJC6	2
XYLT2	2
PIM1	2
MTMR2	2
GRIK1	2
HYDIN	2
ACRBP	2
TTC37	2
TRPA1	2
DNAH9	2
FBXO30	2
ADGRB1	2
UBAC2	2
ADD1	2
PPP1R10	2
DAB2	2
EPB41L4B	2
TGM3	2
ZNF536	2
SH3RF3	2
CACNA1C	2
CDH19	2
ETAA1	2
FOXP4	2
C1GALT1	2
SLC6A15	2
NXF1	2
EPHA8	2
ATP2B2	2
ADAMTS9	2
RGL3	2
TRIM8	2
SH3TC1	2
CASP8	2
UNC80	2
TMCC2	2
CDH9	2
AKAP10	2
CACNA1E	2
SLITRK2	2
KDM2A	2
SHROOM2	2
IRS4	2
RBFOX1	2
EFTUD2	2
POLA2	2
NBN	2
PPP1R9A	2
SLC15A5	2
HNRNPA2B1	2
MAP1S	2
MYCBP2	2
SCN9A	2
POLD1	2
RAB3GAP1	2
DLGAP4	2
LIMK2	2
GLI3	2
MROH5	2
PCID2	2
TET2	2
ZNF148	2
MXRA5	2
TMEM132B	2
KCNH7	2
FGD6	2
KIAA1217	2
ABCA12	2
DAB2IP	2
SATB2	2
KCNV2	1
SCUBE1	1
APLF	1
PPP2R5D	1
COL1A2	1
UNC5D	1
TPO	1
SLC20A1	1
BSN	1
PLXNB1	1
ARHGAP42	1
ZNF143	1
LRCH1	1
PCCA	1
CDC25B	1
ZNF341	1
DHX37	1
ARVCF	1
N4BP2	1
UMODL1	1
TBR1	1
RAPGEF4	1
CDH10	1
WDR59	1
MAD1L1	1
FAM71A	1
JAG2	1
FASN	1
SCN4A	1
ZNF236	1
ESYT1	1
MSH2	1
ROCK2	1
GREB1	1
MITF	1
C2CD3	1
PTPRA	1
SEC23IP	1
ERAP1	1
CERS6	1
OTC	1
PSD2	1
KIF13B	1
NFKB2	1
MAPKBP1	1
ISLR	1
NIT1	1
NTM	1
JMJD8	1
ZNF496	1
BRCA1	1
STXBP1	1
NOM1	1
PRKCQ	1
SF3A2	1
D2HGDH	1
EP400	1
CCT8	1
RYR2	1
PPARGC1B	1
WWOX	1
CLTC	1
IRF1	1
ANO4	1
DKK1	1
SDK1	1
ADGRL4	1
MAOB	1
ZNF407	1
PKDREJ	1
SHOC1	1
COL19A1	1
ADCY8	1
NRF1	1
MAST2	1
DLC1	1
HBP1	1
GANAB	1
TAF3	1
DAG1	1
KIAA0319	1
CRYZ	1
GJC1	1
NOTCH1	1
CACNA1F	1
RSPH3	1
PRKD2	1
RPS6KB2	1
CELF2	1
STAU1	1
SEZ6L	1
ZNF710	1
CDHR2	1
SCIMP	1
TNRC18	1
SCNN1G	1
STXBP3	1
MTCL1	1
BAZ1A	1
KIF19	1
PCYT1B	1
YTHDC2	1
FREM1	1
BRINP1	1
ZNF292	1
CUBN	1
USP19	1
PDCD11	1
KIAA0232	1
CENPE	1
JMJD1C	1
CDH1	1
FBF1	1
EHMT1	1
USP20	1
NHS	1
PLPPR1	1
COL11A2	1
EPHA7	1
MTSS1	1
CFAP57	1
TBXAS1	1
TM2D2	1
SLC6A2	1
SAFB	1
NUMA1	1
ATR	1
LZTS3	1
RNF6	1
PCDH15	1
SCNN1A	1
WHAMM	1
HOMER2	1
RYR3	1
SCN2A	1
TM4SF5	1
KCNN3	1
AMOT	1
LRCH2	1
IKBKG	1
TBCD	1
QKI	1
CLVS2	1
PSMC4	1
RBMS2	1
UHRF2	1
GUF1	1
TUSC3	1
IFRD2	1
HNRNPM	1
PTPRS	1
TTBK2	1
PDE6A	1
PIEZO2	1
ACTG1	1
TDRD12	1
BNC2	1
GRIP2	1
SLC2A13	1
CNNM2	1
ZNF511	1
FMN1	1
PKD1L2	1
GBA	1
LTBP2	1
GRIN2D	1
POU3F3	1
PTCH2	1
TRIM23	1
ADCY7	1
USP48	1
STXBP2	1
PCDH17	1
STAG1	1
PSPC1	1
CSRNP2	1
URB1	1
FILIP1L	1
NMD3	1
PRKAG3	1
DISP1	1
ITGA1	1
KIAA0753	1
ARHGAP17	1
LOXHD1	1
SLC4A1	1
CLDN34	1
OPRM1	1
SPTBN1	1
MKLN1	1
KDM7A	1
SHANK2	1
ASXL1	1
DISP2	1
SLC9A3	1
RHEX	1
HTR4	1
PARN	1
EPB41L3	1
PRKD1	1
PLXDC1	1
PRRC2B	1
GRIPAP1	1
TNMD	1
NARF	1
ESR1	1
DST	1
SNX31	1
MGAM2	1
KIAA1549L	1
MAP4K2	1
MTA2	1
KIAA1109	1
CNTNAP5	1
TRIM13	1
DIAPH3	1
KLHL40	1
SCAND1	1
GABRA5	1
GABRB3	1
LCORL	1
LIPI	1
SKIL	1
F13A1	1
RGS1	1
RHOBTB1	1
ACAP3	1
VWA3A	1
TJP2	1
ZNF677	1
DHX34	1
MAGI3	1
DEPDC7	1
ZBTB17	1
MAPKAPK3	1
FYCO1	1
TNPO2	1
AMOTL2	1
MLPH	1
INTS13	1
DDX47	1
B4GALNT3	1
ADGRV1	1
SLC12A1	1
KCNT2	1
HS3ST2	1
NEXN	1
GPR142	1
RABL6	1
ADGB	1
NTRK2	1
TMEM131L	1
ASIC5	1
KMT2C	1
HS6ST3	1
ACSS2	1
TRPC4AP	1
SLC13A3	1
CUX2	1
HNF1A	1
SCN8A	1
SPG11	1
RASGEF1B	1
DLG1	1
PLXNA2	1
SPIRE1	1
FNDC1	1
ZBTB32	1
MOV10L1	1
SMC1B	1
OR2L13	1
ALX1	1
PRKAG2	1
TRIML2	1
PC	1
SLITRK5	1
GPC5	1
TFAP2C	1
PRAME	1
CHAT	1
TOX	1
GOLGB1	1
AGPS	1
POU2AF1	1
MARVELD3	1
XYLT1	1
LAD1	1
FAM161B	1
RHBDF2	1
MAP3K3	1
NUP214	1
ATP1A3	1
CHSY3	1
ACSL6	1
ZNF318	1
COL14A1	1
OR2T2	1
POMGNT1	1
PTPN12	1
SLC6A1	1
RET	1
MCM4	1
CCDC158	1
PSMD2	1
NRSN1	1
ZNF311	1
MNDA	1
CCAR1	1
GRID2IP	1
INTS7	1
SLC35A2	1
CHM	1
STEAP2	1
INSIG1	1
POGZ	1
PELI3	1
DRC7	1
TMPRSS9	1
KANSL2	1
PREX2	1
PTDSS1	1
FAM217A	1
CAMK2G	1
LEXM	1
IGFALS	1
SLC44A5	1
HELZ	1
COQ8B	1
SLC27A6	1
UBA6	1
NCAPG2	1
MSR1	1
SMC6	1
ABI1	1
MLLT10	1
ID3	1
MTG2	1
KSR2	1
LMO4	1
PDK2	1
ADGRG4	1
SAMM50	1
PCLO	1
AMER3	1
PFKP	1
C1QA	1
IER2	1
RPL36	1
MBNL1	1
PI4K2B	1
TXNDC5	1
CWC22	1
GPRIN2	1
RAI1	1
SDCCAG8	1
SOHLH1	1
TLR7	1
FLT4	1
HOXA13	1
RELN	1
PACSIN3	1
CCDC88B	1
NRG2	1
SLC30A5	1
GLT8D1	1
HDAC7	1
ZFYVE16	1
NCSTN	1
CDH15	1
TAOK2	1
HAUS1	1
SLC7A9	1
SMAP1	1
XPC	1
P4HA3	1
RALGAPA2	1
ITGA5	1
PTPRE	1
ASPH	1
ARL13B	1
CLK1	1
NBEAL1	1
SIPA1L2	1
MYH11	1
RPUSD1	1
UNK	1
IKZF3	1
ACAT2	1
GRM4	1
SLC4A1AP	1
ALMS1	1
FBXL13	1
FOXM1	1
HTRA3	1
HSPBAP1	1
MYLK	1
MMP3	1
PTPRC	1
PIK3C3	1
PHF21B	1
RRAGC	1
GALNT14	1
ACCS	1
PFN2	1
STRC	1
HERC1	1
CACYBP	1
PSMD8	1
ARHGEF40	1
DDX60	1
ADRA2B	1
LINGO4	1
STAM	1
IL5RA	1
CELF5	1
PCNA	1
FGFR2	1
LPCAT1	1
DOCK2	1
NIM1K	1
KCNAB3	1
GAS7	1
RMI2	1
GPR161	1
ARFGEF3	1
SLC35D2	1
POU2F2	1
USP15	1
CTNNA1	1
KIT	1
PCDHA13	1
PIK3R1	1
MACO1	1
SLC25A42	1
SUGP2	1
SBNO2	1
GIGYF2	1
ATXN2	1
KIAA0825	1
SEL1L3	1
NSG2	1
ABCC1	1
RGSL1	1
MPZL1	1
ELK1	1
SNX14	1
IRF2	1
BEST1	1
OR7E24	1
INSR	1
COL17A1	1
EIF3A	1
SPTBN5	1
PATL2	1
CSK	1
CNTN2	1
MIB2	1
ADAM15	1
ASXL3	1
FAM184A	1
KANK1	1
GFPT2	1
TFAP2B	1
TECRL	1
CDK17	1
VWCE	1
HTR2A	1
CTNNB1	1
AGAP1	1
R3HCC1L	1
GULP1	1
MYPN	1
DNAAF5	1
INTS2	1
MYH14	1
GRM6	1
MACC1	1
GASK1B	1
PTPN4	1
PTH	1
DACH1	1
IPO5	1
FBXL2	1
SNX5	1
KIF16B	1
POSTN	1
ACADSB	1
JAKMIP1	1
TRPM7	1
MYO5A	1
ZC3H15	1
NDUFS1	1
TTC13	1
SNX19	1
PGM1	1
MAF	1
CHST9	1
MMP14	1
SYNE3	1
AR	1
GCNA	1
LRP3	1
CDCP1	1
PLPP2	1
CDC16	1
GRK7	1
UQCR10	1
ATP10A	1
SLTM	1
SPEF2	1
CLN3	1
YY1	1
GRIN2C	1
MRC2	1
KIF2B	1
PTCHD4	1
NDRG2	1
KDM4D	1
KLHL35	1
KCNH3	1
FAM160B1	1
LAMC1	1
FIBCD1	1
DACT2	1
PIP4K2C	1
FRS3	1
XPO5	1
FAM135B	1
ADAM9	1
NOL10	1
GTPBP4	1
ARHGEF28	1
MYOM3	1
SLC9A9	1
TANGO2	1
ZNF74	1
CFAP58	1
ZNF639	1
DSCAML1	1
LEPR	1
IVNS1ABP	1
MAP4K1	1
CSF2RB	1
PAPPA	1
BRD2	1
KIF2A	1
NDRG4	1
BNC1	1
TMPRSS15	1
SLC19A1	1
XXYLT1	1
URB2	1
UNC5A	1
GBA2	1
SLC35B4	1
LRP5	1
CDC123	1
MTOR	1
NFIC	1
HAPLN1	1
CMYA5	1
TLNRD1	1
SLC34A2	1
ADRB2	1
MROH2B	1
SIK2	1
WDR24	1
BRWD3	1
HMGXB4	1
QPCT	1
IKZF1	1
SUPT20H	1
ROBO2	1
AFF1	1
SLC22A23	1
NHEJ1	1
TRIM67	1
SNX18	1
ZFP90	1
FMN2	1
SLC14A2	1
DHX8	1
TUT7	1
TCF20	1
CNNM4	1
KIAA1958	1
TLR4	1
FARP1	1
GALNTL6	1
XKR4	1
HAUS3	1
TIGD2	1
CADM1	1
CPSF4	1
NSL1	1
SMAD2	1
CELF4	1
KIAA0586	1
TBC1D32	1
UBQLN1	1
PPP1R18	1
IKBKB	1
VPS51	1
ALDH1L1	1
DGAT2	1
CAPN7	1
RPAP3	1
FAM234B	1
NIPA1	1
TJP1	1
SLC30A10	1
SLC9A5	1
COP1	1
ODF2	1
RS1	1
ARHGAP36	1
APBA1	1
EML2	1
ACP7	1
NDUFS3	1
ATP11A	1
THAP7	1
NELL2	1
SCD5	1
UNC5B	1
KIAA0513	1
MRPL38	1
SLC16A6	1
TSHZ1	1
LURAP1L	1
FAM83B	1
REV3L	1
FRK	1
SLA	1
TSNARE1	1
CAPN13	1
WDR33	1
AP3D1	1
PLSCR4	1
ALPK3	1
CBLB	1
CDT1	1
JDP2	1
ADAMTS13	1
SPAST	1
NAT10	1
DPYSL3	1
LACTBL1	1
GRM2	1
FER	1
SEMA4B	1
RUBCN	1
LGALS8	1
MICU1	1
BCL11B	1
ATRX	1
AIFM1	1
IGSF1	1
G6PD	1
NPAS2	1
CUL7	1
RNF11	1
TRNT1	1
NCOA3	1
ANGPTL2	1
ANOS1	1
CCDC106	1
LONRF2	1
RASGEF1C	1
PRIM2	1
DGKB	1
MINDY3	1
DDX4	1
CHD9	1
ZBTB7A	1
ST18	1
ARAP2	1
KLHL6	1
SLC38A11	1
JAK1	1
NHSL1	1
TMEM200A	1
TMEM131	1
NRXN1	1
HEATR5B	1
EXOC6B	1
KCNA4	1
CHD6	1
BCR	1
RERG	1
TICRR	1
PLA1A	1
MAP3K13	1
NAALADL2	1
PDE1A	1
USP54	1
SLC45A1	1
GTF3C1	1
CAPN15	1
SYT4	1
SMAD7	1
FAM104A	1
SLC27A4	1
VSIG4	1
CENPI	1
THSD7A	1
SLC7A2	1
TMEM214	1
BIRC6	1
LRRC4C	1
RAB3C	1
HELQ	1
PGAP1	1
ZNF142	1
CYB561D1	1
FOS	1
RNF213	1
EFCAB5	1
CHRDL1	1
ALDH1A1	1
MOB3B	1
RPL10A	1
TDRD6	1
ITPRID1	1
ZMYM4	1
MYLK3	1
RPS7	1
ANO9	1
HIPK3	1
DDB1	1
INPP4B	1
PDCD6IP	1
KY	1
XRN2	1
ZNF217	1
PITPNM2	1
PAPSS2	1
TMTC1	1
NEO1	1
ADAMTS1	1
CRYBG3	1
LSAMP	1
ABCC5	1
PATJ	1
ZFHX3	1
LUC7L	1
RBBP8	1
CASK	1
KLHL4	1
FOXK2	1
ZC3H4	1
SLC26A4	1
ZBTB40	1
PGD	1
HCN2	1
PTPRO	1
MKI67	1
HNF4G	1
IGF1R	1
CEP152	1
RANBP3L	1
KDM6B	1
TNFAIP3	1
SCAF1	1
JADE2	1
SLC25A32	1
LOXL2	1
COPS7B	1
ANKLE2	1
PRSS12	1
CFAP44	1
JARID2	1
GALNT13	1
ACVR1	1
INHA	1
SAR1A	1
LIMK1	1
LRRC7	1
SLC9C2	1
RTTN	1
OSCAR	1
NOTCH4	1
PEX1	1
TTC29	1
ZNF786	1
EPS8L2	1
PTPRU	1
PTPRG	1
GNAI2	1
TYK2	1
GLRA3	1
PDE6D	1
OAS2	1
CIT	1
KIF11	1
HPS1	1
EVC	1
SPATA17	1
MYH4	1
FBXL19	1
GPR137C	1
SIX4	1
GPATCH2L	1
HGS	1
DIPK1C	1
PNPLA5	1
TNFRSF13C	1
DDX58	1
TG	1
GLI2	1
IFFO2	1
USP47	1
MAN2A1	1
RNF44	1
ACADVL	1
GAS8	1
GSE1	1
DACT1	1
SIPA1L1	1
PRKCA	1
BTBD9	1
MGAM	1
FGFR4	1
LRRC40	1
CFHR5	1
BRF1	1
SARDH	1
WFS1	1
CNGB1	1
DOT1L	1
CSPG4	1
SLX4	1
KANSL1	1
VTN	1
UTRN	1
AXL	1
CYP27B1	1
ELFN2	1
RFX4	1
HSD17B4	1
LGSN	1
PCDH18	1
EPHA2	1
GXYLT2	1
CACNA2D2	1
DNAJC13	1
RBL1	1
HELZ2	1
LIPF	1
CRTC3	1
WDR76	1
CFAP65	1
SLC29A3	1
MLXIPL	1
DDAH1	1
ASPM	1
CNST	1
SHB	1
SLC6A9	1
TLR3	1
LAMB1	1
RBBP4	1
BTBD2	1
SESN3	1
TMCO3	1
TRIM71	1
MATN4	1
NEK1	1
CRYBB3	1
EXOC6	1
POLG	1
ACSBG1	1
POLQ	1
FXR1	1
UBR3	1
SCRN3	1
CNPPD1	1
KIRREL3	1
MYSM1	1
FANCA	1
DSG1	1
GNA13	1
PTGS1	1
FAM199X	1
WDR7	1
DCC	1
MC2R	1
WNK2	1
PTPRH	1
ZNF541	1
IRF2BP1	1
SIX5	1
CYP2A13	1
CYP2F1	1
LTBP4	1
PMEL	1
NEMP1	1
MBD6	1
MSRB3	1
PTPRB	1
ZFC3H1	1
KCNC2	1
TGFBRAP1	1
SLC9A4	1
FANCL	1
PLEK	1
TDRD7	1
ABCA1	1
DHX16	1
PACSIN1	1
CLPS	1
ANXA13	1
WASHC5	1
KHDRBS3	1
TMPRSS11F	1
ABCB1	1
GNL2	1
GRIK3	1
CSF3R	1
PTPRF	1
NAV3	1
NR3C2	1
MAB21L2	1
GRIA2	1
FNIP2	1
RAPGEF2	1
UBN2	1
SLC4A2	1
FASTK	1
KAT6A	1
WWC2	1
RNF144A	1
LRRTM1	1
LPXN	1
TNKS1BP1	1
BIN1	1
ZEB2	1
GPR158	1
ARHGAP21	1
GMEB1	1
TMEM51	1
PEX14	1
CADPS	1
LAMB2	1
CCRL2	1
TM6SF2	1
DDX49	1
ZNF358	1
MLLT1	1
UVRAG	1
ARHGEF17	1
PCDH20	1
COL4A1	1
VILL	1
SCN10A	1
PANK2	1
SPO11	1
DOCK5	1
HR	1
DNER	1
DIS3L2	1
ATP6V0A2	1
ABCB9	1
NAA25	1
RNF10	1
TTC28	1
PATZ1	1
CLTCL1	1
SLC11A2	1
C2CD5	1
A2ML1	1
CALHM3	1
SORCS3	1
LYN	1
SLC26A7	1
VIRMA	1
PJA2	1
LETM1	1
PDS5A	1
RFC1	1
PCDH7	1
MAP1A	1
UNC13C	1
ZNF280D	1
ANXA2	1
DOP1B	1
DYRK1A	1
RIPK4	1
MCM3AP	1
BMP2K	1
CCSER1	1
GRID2	1
NSUN3	1
CMSS1	1
EIF4G1	1
ETV5	1
RNF39	1
ITGB6	1
RBM45	1
OSBPL6	1
ZNF804A	1
COL3A1	1
STK36	1
UCK2	1
ZP4	1
TSPAN14	1
RANBP17	1
PANK3	1
GABRA6	1
TNIP1	1
HCN1	1
C7	1
FYB1	1
ZBTB16	1
ELP5	1
CHD3	1
PRDM16	1
GPR153	1
ESRP2	1
CDH5	1
MCM7	1
ARPC1A	1
TTLL7	1
NR5A2	1
FCMR	1
CEP350	1
PLD5	1
SMG5	1
GATAD2B	1
GALNT1	1
KCTD1	1
PSME2	1
KLHDC2	1
ZBTB1	1
BTBD7	1
SLC38A10	1
USP36	1
EVPL	1
P3H4	1
LUC7L3	1
BCAS3	1
RNF135	1
CAMKK1	1
COL5A1	1
IL1RAPL1	1
TMEM47	1
FGF16	1
ESX1	1
RTL9	1
ACTRT1	1
BGN	1
MED23	1
SKIV2L	1
MERTK	1
KDF1	1
STAB1	1
RALGAPB	1
AEBP2	1
BOD1L1	1
BIRC3	1
CHD5	1
RADIL	1
SMURF2	1
ZDHHC15	1
MROH1	1
ATP7B	1
SLCO2A1	1
RHOBTB2	1
MROH2A	1
FAM186A	1
SIN3A	1
ZCCHC24	1
ITGAL	1
ZNF24	1
USP14	1
STIL	1
POU4F2	1
RBM46	1
ZNF638	1
FMNL2	1
TXNRD3	1
CHL1	1
TM9SF2	1
ZNF385D	1
GJB6	1
FOXN4	1
PRR14L	1
TDRD1	1
IQCH	1
DNAH5	1
PCNX2	1
UNC79	1
NUP85	1
CYLC1	1
ITIH4	1
EPAS1	1
MEIS1	1
TEK	1
CFAP206	1
ASIC3	1
RBL2	1
KLF15	1
PCF11	1
FOXO1	1
UBL3	1
PAQR5	1
PTPN13	1
KIAA1328	1
KLHDC1	1
NUP188	1
TTLL8	1
EIF5B	1
DDX46	1
ABRA	1
WNT4	1
FAIM	1
PPP1R16B	1
TNFRSF6B	1
COMT	1
BTAF1	1
EMX2	1
PRKG2	1
NPFFR1	1
DRD2	1
GLRA2	1
PAK3	1
NUAK1	1
ZNF462	1
IBTK	1
FHL5	1
SKAP2	1
PARVA	1
GINS1	1
XRN1	1
RGS12	1
FSIP1	1
CFAP45	1
SPTA1	1
GSG1L	1
COQ8A	1
FSCN2	1
SNAPC4	1
KIAA1755	1
ATG16L1	1
FAM110B	1
FAM184B	1
BMX	1
TBC1D8B	1
ADCY1	1
CSGALNACT1	1
ZNF703	1
UBXN4	1
PROSER2	1
OR52L1	1
FNDC3A	1
EXTL3	1
ACOX3	1
MCCC1	1
ST6GAL1	1
SPAG16	1
REEP3	1
TEKT3	1
ZNF644	1
RFX3	1
SSC5D	1
CD63	1
CYHR1	1
TMTC2	1
EFR3B	1
SLC4A8	1
CACNB3	1
NSD2	1
CAPN6	1
UGT2A1	1
KCNIP3	1
APEH	1
NDUFS7	1
DIDO1	1
C8orf88	1
DDX6	1
ENO3	1
KIF4A	1
FNIP1	1
NXPH1	1
KLHL7	1
ARNT	1
MYO3A	1
HTT	1
HCLS1	1
MARK1	1
CRTAM	1
UBE4B	1
ZNF276	1
ROCK1	1
VRTN	1
GALK1	1
HDAC5	1
DCX	1
PRUNE2	1
PEG3	1
NLRP8	1
LRFN2	1
HS3ST5	1
IQUB	1
AGO3	1
DPYSL5	1
ZNF697	1
OR5I1	1
FAM107A	1
NALCN	1
RHBDD1	1
PER2	1
SP1	1
WNT8B	1
CIAO2A	1
NAA11	1
SLC15A2	1
SDHC	1
CCSER2	1
CDH3	1
NEGR1	1
GRIN1	1
ELF4	1
RIMS3	1
HRH1	1
ILK	1
UGT1A6	1
IL1RAP	1
ACTB	1
AQP4	1
ZFP36L1	1
NFATC1	1
SALL3	1
ALPK2	1
ARID1B	1
SYTL3	1
PRKN	1
SERINC1	1
TRDN	1
SLC28A3	1
TRPM3	1
FAM120A	1
ZNF135	1
KMT2B	1
SHMT2	1
LRIG3	1
LGR5	1
RAB21	1
ZBED4	1
SREBF2	1
SGSM3	1
EIF3L	1
TRIOBP	1
STPG4	1
PPP4R3B	1
DMXL1	1
SPOCK1	1
ALDOB	1
MRPS18B	1
TNXB	1
ATF6B	1
RAB44	1
CDC5L	1
TINAG	1
COL21A1	1
GABRR2	1
SOBP	1
DLL1	1
LAPTM4B	1
VPS13B	1
RSPO2	1
ABCB4	1
JAZF1	1
DPY19L2	1
PLK3	1
TEP1	1
OSBPL8	1
CEP83	1
FAM160A1	1
SSPO	1
ATG9B	1
PSD3	1
FGFR1	1
SNTG2	1
MAP4K3	1
HTRA2	1
SLC1A2	1
QSER1	1
SPI1	1
TPCN2	1
SPTBN2	1
NAA15	1
DPP10	1
HNMT	1
TNFAIP6	1
RNF14	1
IL6ST	1
TOX3	1
CLCN6	1
FBLN2	1
LRRN1	1
FRMD4B	1
FLNB	1
CACNA2D3	1
BAP1	1
IQCN	1
HSH2D	1
AKAP8	1
NOTCH3	1
KANK2	1
ICAM1	1
MOB3A	1
APC2	1
ARHGAP45	1
TMEM259	1
ELANE	1
TENM4	1
ACER3	1
OR51T1	1
TRIM22	1
DGKH	1
SLITRK6	1
DOCK9	1
VSX1	1
PYGB	1
MED12L	1
ZMYND8	1
PTGIS	1
HRH3	1
YTHDF1	1
ZBTB46	1
CENPJ	1
ATP6V1B2	1
DOCK10	1
HDAC4	1
GPC1	1
RNPEPL1	1
ANO7	1
FBRSL1	1
CAMKK2	1
HECTD4	1
MVK	1
EWSR1	1
ZDHHC8	1
MED15	1
MAP3K12	1
ANO6	1
SOX5	1
SLCO1B3	1
PIK3C2G	1
MLF2	1
NCAPD2	1
DDX11	1
PARG	1
PPP1R3C	1
PDE6C	1
DPYSL4	1
CYP7B1	1
C1QTNF7	1
UACA	1
LARP6	1
RUNX1	1
LIN54	1
HERC6	1
CSNKA2IP	1
PEX5L	1
RREB1	1
PRSS16	1
ZNF184	1
SCN7A	1
FKBP7	1
DLGAP2	1
COL13A1	1
CDH23	1
DUSP13	1
GPRIN1	1
KIAA1191	1
SGCD	1
ADAMTS15	1
ST14	1
BACE1	1
RNF214	1
WSCD1	1
MAP2K3	1
ADAD2	1
DDX19A	1
ATXN1L	1
NSUN5	1
PLK1	1
SMG1	1
VASN	1
MFSD14A	1
PPFIA4	1
BRINP2	1
TP53BP2	1
MEX3A	1
MOCOS	1
CDH2	1
DLGAP1	1
SEC23A	1
MAP4K5	1
ABHD12B	1
DCXR	1
STRADA	1
STAT5A	1
PCTP	1
ALDOC	1
TAOK1	1
NSRP1	1
EXD3	1
SPTAN1	1
PPP2R3B	1
ARHGAP6	1
RBBP7	1
NR0B1	1
PPP1R3F	1
BTK	1
SLC6A14	1
XIAP	1
BCORL1	1
GPC3	1
PNCK	1
ATP6AP1	1
HIPK4	1
KCTD8	1
HERPUD2	1
TNFRSF8	1
DNAH10	1
ZFYVE27	1
ENPEP	1
PLEKHG4B	1
GRIA1	1
SRRM2	1
LAMB3	1
NOL4	1
KIAA0100	1
CCNB3	1
KIF27	1
ERBB3	1
CHRNA3	1
ASAP2	1
HECW1	1
NLRC5	1
LHFPL4	1
CNTN6	1
SCAP	1
RASA1	1
KRTAP24-1	1
CDS1	1
ITGAV	1
KIF21B	1
KCNH1	1
CCDC102A	1
DYNC1LI1	1
PDZRN4	1
APBA2	1
PLEKHH1	1
ANKS6	1
LRRC73	1
POP1	1
ATP2B1	1
SEC13	1
IL17RB	1
EGF	1
SESTD1	1
BCL9L	1
SERPINA5	1
SRSF2	1
WTAP	1
MYO1A	1
MAP4K4	1
INVS	1
NCDN	1
HCFC2	1
ADAM32	1
SETD5	1
COL7A1	1
PPP1CC	1
CCDC157	1
SLIT1	1
CRMP1	1
CAMK2D	1
ATM	1
SSC4D	1
CHST12	1
ABCA4	1
LRFN5	1
TDRD9	1
CDK12	1
PRPF8	1
WNK3	1
ATP1B4	1
PDE7B	1
C6orf58	1
PCSK5	1
MRPL2	1
MDN1	1
PRIMPOL	1
LARP1B	1
CACNA1D	1
ABHD8	1
MTUS2	1
PRKDC	1
STXBP5L	1
SAMD8	1
ZNF839	1
MAGEB10	1
COL12A1	1
CDCA7L	1
ADAM17	1
NUP210	1
ULK4	1
KCNAB1	1
GCN1	1
FIGN	1
SLIT3	1
ADAMTS18	1
GGA2	1
PPM1A	1
VLDLR	1
LENG8	1
TRAPPC9	1
DCHS1	1
RBM26	1
RIT2	1
ACE2	1
