# Supplementary material for: The genomic landscape of canine diffuse large B-cell lymphoma identifies distinct subtypes with clinical and therapeutic implications
Source: Research Square preprint supplement (doi:10.21203/rs.3.rs-916612/v1), 2021-09-21
Supplement: Supplementary file 18 [file f0583e91f727cf8b06943c89.xlsx]

## Sheet: Index
Supplementary Data 6: Copy Number Aberrations (CNAs) significantly associated with TTP and LSS.

## Sheet: TTP
CNAs significantly associated with TTP.
			Median TTP (days)	p-value		Hazard ratio (95% CI)
				Log-rank test	Cox univariate
CH	CN Gain chr13_62,817,304-63,119,257	no	78			ref
		yes	24	p=0.038	p=0.0399	2.257(1.038-4.909)
	CN Gain chr17_59,763,697-59,834,574	no	78			ref
		yes	26	p=0.026	p=0.0329	2.649(1.082-6.484)
	CN Gain chr17_54,990,179-56,651,602	no	78			ref
		yes	26	p=0.019	p=0.0272	3.187(1.139-8.916)
	CN Gain chr6_43,053,915-43,061,496	no	63			ref
		yes	26	p=0.039	p=0.0452	2.633(1.021-6.79)
	CN Gain chr7_80,947,502-80,965,220	no	78			ref
		yes	25	p=0.006	p=0.00821	3.357(1.368-8.241)
	CN Gain chr10_61,353,861-61,496,904	no	63			ref
		yes	21	p=0.014	p=0.0172	2.981(1.213-7.322)
	CN Loss chr12_50,812,198-52,090,545	no	63			ref
		yes	11	p=0.01	p=0.0152	4.065(1.31-12.31)
	CN Loss chr5_41,294,063-41,457,455	no	44			ref
		yes	16.5	p=0.012	p=0.0183	4.991(1.313-18.96)
CH-IM	CN Loss chr1_60,597,430-60,599,676	no	260			ref
		yes	988	p=0.044	p=0.0503	0.4074(0.1658-1.001)
	CN Loss chr3_91,533,445-91,705,905	no	317			ref
		yes	200	p=0.011	p=0.0157	3.047(1.234-7.526)
	CN Loss chr38_23,726,534-23,898,042	no	300			ref
		yes	203	p=0.04	p=0.0457	2.298(1.016-5.197)
	CN Loss chr28_40,730,710-40,794,931	no	300			ref
		yes	237	p=0.045	p=0.0519	2.535(0.9923-6.478)
	CN Loss chr4_88,146,496-88,239,174	no	300			ref
		yes	148	p=0.046	p=0.0523	2.431(0.991-5.964)
	CN Loss chr28_40,584,480-40,592,820	no	300			ref
		yes	162	p=0.05	p=0.0593	2.615(0.9631-7.098)
	CN Loss chr28_41,035,402-41,038,431	no	300			ref
		yes	237	p=0.046	p=0.0555	2.653(0.9771-7.202)
	CN Gain chr27_4,392,245-4,997,355	no	291			ref
		yes	87	p=0.042	p=0.0489	2.644(1.004-6.962)
	CN Loss chr37_30,727,721-30,860,972	no	300			ref
		yes	148	p=0.014	p=0.0214	3.648(1.211-10.99)
	CN Loss chr6_76,975,995-77,471,110	no	300			ref
		yes	162	p=0.019	p=0.0277	3.451(1.146-10.4)
	CN Loss chr30_40,174,236-40,178,803	no	300			ref
		yes	158	p=0.011	p=0.0175	3.979(1.273-12.44)
	CN Loss chr4_87,349,959-88,102,548	no	300			ref
		yes	162	p=0.019	p=0.0277	3.451(1.146-10.4)

## Sheet: LSS
CNAs significantly associated with LSS.
			Median LSS (days)	p-value		Hazard ratio (95% CI)
				Log-rank test	Cox univariate
CH	CN Gain chr13_21,425,011-21,977,119	no	178			ref
		yes	61	p=0.035	p=0.0395	2.244(1.039-4.846)
	CN Gain chr6_43,061,594-43,079,328	no	165			ref
		yes	64.5	p=0.046	p=0.0511	2.218(0.9961-4.939)
	CN Gain chr13_38,102,396-38,331,240	no	178			ref
		yes	61	p=0.035	p=0.0395	2.244(1.039-4.846)
	CN Gain chr22_17,199,974-22,202,430	no	160			ref
		yes	43	p=0.02	p=0.0258	2.949(1.139-7.631)
	CN Gain chr4_19,569,563-19,979,774	no	160			ref
		yes	30	p=0.016	p= 0.0227	3.301(1.182-9.222)
	CN Gain chr17_40,193,870-48,593,768	no	160			ref
		yes	44.5	p=0.018	p=0.0272	3.623(1.156-11.35)
	CN Gain chr2_54,555,187-54,819,204	no	160			ref
		yes	41	p=0.024	p=0.0374	4.166(1.087-15.97)
	CN Gain chr17_57,782,741-58,664,941	no	165			ref
		yes	65	p=0.014	p=0.0195	2.966(1.191-7.386)
CH-IM	CN Gain chr27_13,184,171-13,191,237	no	547			ref
		yes	356	p=0.024	p=0.0273	2.34 (1.1-4.978)
	CN Gain chr27_4,392,245-4,997,355	no	544			ref
		yes	202	p=0.044	p=0.0531	2.591(0.9872-6.803)
	CN Gain chr27_1,899,890-2,261,508	no	544			ref
		yes	202	p=0.044	p=0.0531	2.591(0.9872-6.803)
	CN Gain chr2_36,391,086-36,400,737	no	442			ref
		yes	na	p=0.032	p= 0.062	0.1476(0.01979-1.101)
	CN Gain chr37_0-10,561,893	no	544			ref
		yes	148	p=0.0003	p=0.00165	6.471(2.022-20.71)
	CN Gain chr4_10,404,105-10,444,750	no	544			ref
		yes	94	p=0.041	p=0.0783	6.939(0.8031-59.96)
	CN Gain chr22_26,911,246-33,367,372	no	544			ref
		yes	140	p=0.0045	p=0.015	7.129(1.464-34.71)
	CN Loss chr2_85,320,500-85,426,708	no	544			ref
		yes	76.5	p=0.00011	p=0.00269	12.58(2.407-65.76)
	CN Gain chr13_50,189,922-53,626,865	no	267			ref
		yes	603	p=0.047	p=0.0517	0.5002(0.2489-1.005)
