# Supplementary material for: The genomic landscape of canine diffuse large B-cell lymphoma identifies distinct subtypes with clinical and therapeutic implications
Source: Research Square preprint supplement (doi:10.21203/rs.3.rs-916612/v1), 2021-09-21
Supplement: Supplementary file 19 [file fe3810bf12f2a172f04af02c.xlsx]

## Sheet: Index
Supplementary Data 14: Survival analysis of 56 cDLBCLs analyzed for TP53 mutation.

## Sheet: TTP
Median TTP and survival analysis for validation cohort dogs (n=56).
		Median TTP (days)	p-value			Hazard ratio (95% CI)
			Log-rank test	Cox univariate	Cox multivariate
Breed	Pure	213	p=0.8	p=0.8		1.10 (0.59-2.05)
	Mixed	194				ref
Age	<10 years	213	p=0.5	p=0.5		1.21 (0.66-2.23)
	≥10 years	202				ref
Sex	Male	202	p=0.4	p=0.4		1.27 (0.71-2.27)
	Female	197				ref
Weight	<10 Kg	118	p=0.6	p=0.6		1.38 (0.43-4.49)
	≥10 Kg	213				ref
Stage	3	210				ref
	4	122				0.71 (0.15-3.35)
	5	235	p=0.9	p=0.9		0.72 (0.17-3.07)
Substage	a	239				ref
	b	164	p=0.09	p=0.1		1.69 (0.91-3.14)
Bone marrow	Infiltrated	197	p=0.9	p=0.9		1.02 (0.57-1.86)
	Not infiltrated	213				ref
Bone marrow infiltration (%)				p=0.1	p=0.04	1.02 (0.996-1.044)
Blood infiltration (%)				p=0.975		1 (0.98-1.02)
LDH	Normal	226				ref
	Increased	194	p=0.08	p=0.08	p=0.012	1.71 (0.93-3.14)
Pre-treatment with steroids	yes	128	p=0.005	p=0.007		2.41 (1.28-4.56)
	no	239				ref
TP53	mut	66	p=8e-07	p=4e-05	p=2e-06	6.02 (2.71-13.34)
	wt	249				ref

## Sheet: LSS
Median LSS and survival analysis for validation cohort dogs (n=56).
		Median LSS (days)	p-value			Hazard ratio (95% CI)
			Log-rank test	Cox univariate	Cox multivariate
Breed	Pure	361	p=0.9	p=0.9		0.98 (0.51-1.86)
	Mixed	352				ref
Age	<10 years	361	p=0.3	p=0.3		0.72 (0.37-1.38)
	≥10 years	352				ref
Sex	Male	385	p=0.9	p=0.9		1.03 (0.56-1.89)
	Female	352				ref
Weight	<10 Kg	270	p=0.3	p=0.3		1.87 (0.57-1.17)
	≥10 Kg	354				ref
Stage	3	343				ref
	4	156				1.01 (0.21-4.78)
	5	364	p=0.5	p=0.5		0.67 (0.16-2.84)
Substage	a	364				ref
	b	215	p=0.2	p=0.2		1.59 (0.82-3.08)
Bone marrow	Infiltrated	361	p=0.9	p=0.9		1.03 (0.55-1.93)
	Not infiltrated	354				ref
Bone marrow infiltration (%)				p=0.09		1.02 (0.996-1.053)
Blood infiltration (%)				p=0.413		0.99 (0.969-1.013)
LDH	Normal	385				ref
	Increased	331	p=0.1	p=0.1	p=0.01	1.63 (0.86-3.07)
Pre-treatment with steroids	yes	196	p=0.02	p=0.03		2.17 (1.12-4.23)
	no	361				ref
TP53	mut	112	p=6e-05	p=1.7e-04	p=4.4e-06	3.79 (1.89-7.59)
	wt	364				ref
